# Supplementary material for: Anatomical and single-cell transcriptional profiling of the murine habenular complex
Source: eLife. 2020 Feb 11;9:e51271. doi: 10.7554/eLife.51271 (PMC7012610; doi:10.7554/eLife.51271)
Supplement: Supplementary file 1. [file elife-51271-supp1.csv]

	Fibroblasts	Macrophages	Microglia	Microglia	Ependymal Cells	Endothelial cells	Pericytes	Astrocytes	Polydendrocytes	Neurons_mhb(1)	Neurons_lhb(1)	Oligodendrocytes	Diff. Oligodendrocytes
X0610006L08Rik	0	0	0	0	0	0	0	0	0	0.000766645051659721	0.00170932807680763	0	0
X0610007P14Rik	0.862645057878786	0.424223546725487	0.233840084022209	0.241520906894341	0.472706024097336	0.143921152195802	0.216330557275922	1.42932629837441	1.69980598151762	0.621824608187529	0.479391051649167	0.827613101814551	1.27495760347633
X0610009B22Rik	0.10016627601819	0.100577131059769	0.219723346182156	0.233829772317716	0.202544441769114	0.251199888341724	0.20886645081402	0.24327106668203	0.43975261582057	0.471376459111047	0.351360389964245	0.418427901886898	0.827710603151358
X0610009E02Rik	0	0.0771497785801355	0	0.0188616610333172	0.18806183473126	0.00909911483810855	0	0	0.025740405618728	0.0365035644102674	0.0420824526631354	0.0272484372873479	0.00236158736456296
X0610009L18Rik	0	0.0785141174800995	0.0337159070190744	0.0633719276598291	0.998139458108892	0.0291937356512045	0.228398373977919	0.134994082268155	0.111497376071765	0.0621728363370582	0.0898141823024849	0.106492971632328	0.0839860991886442
X0610009O20Rik	0.272719768881552	0.303741335371753	0.192716122309936	0.0684560616984767	0.29825817227392	0.292782986672331	0.283879230120541	0.637774376780273	0.257588521700807	0.15363076197138	0.146003273554844	0.253077247040498	0.135700422760187
X0610010F05Rik	0.173955482336292	0.106613054747525	0.00395823116149148	0.0836984821312211	0.56466831760845	0.09478558179443	0.0875107619617902	0.0659472885855025	0.120276512242695	0.286714395422133	0.416611238757853	0.192301470826276	0.113215850159426
X0610010K14Rik	0	0.180417455808925	0.0121343171837706	0.0802092896808509	0	0.0412550031312163	0	0.0298680233476265	0.0405039836469923	0.0143845529294777	0.0115620013214825	0.0119794193575437	0.00803213428110094
X0610011F06Rik	0	0.0777246288790663	0.139699385563872	0.121196750971724	0.552036359382015	0.191864914525517	0.636327575300526	0.538002376176869	0.957908179697234	0.688985921871031	0.711992779970189	0.328076023257266	0.229288480436991
X0610012D04Rik	0	0	0.0386845381562255	0	0	0.0244882342078212	0.0306597988717194	0	0.00760221067457414	0.00608094303587174	0.00725648787940454	0	0
X0610012G03Rik	0.56632288391945	1.61237441000007	0.606982065747823	0.602617476648856	0.440426065826431	0.641225850907464	0.590921223443381	0.995502673463719	0.997536229012703	1.47874466513894	1.40940832172869	0.34929011077648	0.611054762186553
X0610025J13Rik	0	0	0	0	0	0	0	0	0	0.00310365717931506	0	0	0
X0610030E20Rik	0	0.073901539780936	0.140830802734121	0.130590192694607	0	0.0416650576044002	0.374751727066509	0.107489188385119	0.248243724881696	0.107649971136539	0.117043580459139	0.116022729358948	0.241779300813578
X0610031O16Rik	0	0	0.0932198569447581	0.134850029867461	0.195419369967951	0.117611795529706	0	0.0558886702936712	0.27526257898915	0.463484945591409	0.406652659108473	0.0642976577415908	0.227165054235195
X0610033M10Rik	0	0	0	0	0	0.0356507954155826	0.0992881042922247	0	0	0.00339100093331632	0.0032890625513916	0	0
X0610037L13Rik	1.42217460743576	0.202126860909561	0.317774752125462	0.184321279352103	0.199481055761705	0.35097432071281	0.218560736275622	0.514749885111474	0.546839980885127	0.323296052866578	0.270117847245332	0.218406450406751	0.174050427878607
X0610038B21Rik	0	0	0.0727620261855975	0.0688683903794076	0	0.0332025190180106	0	0.0635809637628187	0.0155814764800831	0.0311461508400682	0.0100995183655848	0.0810897254137355	0.048868302307699
X0610040B10Rik	0	0.123897313906235	0	0	0.0733848005401121	0.0218847429233424	0	0.0235906364045983	0.0975538825429119	0.0702619924884922	0.093649496248256	0.0664215726788273	0.0692594702621483
X0610040F04Rik	0	0	0	0	0	0	0	0	0.0153582228693153	0.0025884781557225	0.00769914015627911	0	0
X0610040J01Rik	0	0.722998784407979	1.5794294707835	1.05007881678299	0	0.0242172103222491	0	0.00505333032154846	0.638523067044181	0.0137382883984858	0.00967376861415532	0.039618260758661	0.0615885973474112
X0610043K17Rik	0.102011670135063	0	0	0	0	0	0	0	0.00993699942365403	0.00372475369066823	0.00299219873944652	0	0
X1010001B22Rik	0	0	0	0	0	0	0	0	0	0.000228040992192675	0.00660935038016983	0	0
X1010001N08Rik	0	0	0	0	0	0	0	0.0261723238144592	0.0143952207866988	0.00138501385010986	0.00262370391864038	0	0
X1110001J03Rik	0.596729920038191	0.141940612047919	0.0928064380405855	0	0.19931051586103	0.177491228137399	0.49298228009326	0.992532113196762	0.56620282709878	0.572758433316858	0.615784395849564	0.3787589949566	0.281913110464123
X1110002J07Rik	0	0	0	0	0	0	0.026725248411184	0	0	0.00610836749929653	0.00409979894585969	0	0
X1110002L01Rik	0	0	0.0903278307899601	0.212070791349422	0.0688496598826802	0.0630642395174337	0	0.0254636863515011	0.0663339618922502	0.207423102504969	0.186779552672933	0.0660594084362031	0.0217149813898172
X1110002O04Rik	0	0	0	0	0	0	0	0	0	0.000480636709061228	0.00135872518967804	0.0132013201320132	0
X1110004E09Rik	0.112574580659687	0.238920056033011	0.0442335408285632	0.0493388311295639	0.891016206572701	0.154459902226929	0.123504815455445	0.261623729613811	0.223846496134064	0.415742193609402	0.23768546212765	0.194783450453857	0.159573233625791
X1110004F10Rik	1.87098334201227	1.25052620228776	1.32924499552843	0.463373090236184	1.52062279805647	0.860226684996798	1.99356362502103	1.63314963071185	2.66942595241391	3.07596657009606	2.40143395332165	1.84931482655093	3.28882028641131
X1110008F13Rik	1.94040027957296	1.50725962656134	2.00284930214911	0.834341590427307	0.827462090933019	1.03381173097591	1.5372310377419	1.50898214624441	1.68127318534379	1.53182297724267	1.16343606191644	1.45154394620118	1.42432294480159
X1110008L16Rik	0	0.0909951226614253	0.00673310898614191	0.0680531358885017	0	0.0619473384102238	0	0	0.0253313740108633	0.0304803334296835	0.0195461109661212	0.0146356099024537	0.0470792456351086
X1110008P14Rik	0	0.151632321945746	0.060071682010686	0	0.112958611964576	0.302157911728945	0	0.296225452216553	0.204180418181894	0.637302523065215	0.677413026225843	0.177517506368877	0.20150519246273
X1110012L19Rik	0	0.0604127398385772	0.0742232570002858	0	0	0.109630679196842	0.0726950225718045	0.151367215344559	0.183169671613436	0.223967628118471	0.171764332456732	0.102420321319272	0.0930358284078488
X1110017D15Rik	0	0	0	0	5.16605474932614	0	0	0	0.0146005159303437	0.0332251832528967	0.018323492767356	0	0
X1110018N20Rik	0.206311368515119	0.0590452057449272	0.0216033580259716	0.0360189027201475	0.131905239276104	0.021157908364837	0.0544948368089634	0	0.0236494158270832	0.100457332064991	0.0437376020982694	0	0
X1110019D14Rik	0	0.048490491014712	0.0585167173787096	0.0798008171603677	0.272336401075886	0.0238305847651615	0	0	0.0740957843442682	0.0323274727962582	0.0451761523701193	0.00969497194517493	0.0256227490637234
X1110020A21Rik	0	0	0	0	0	0	0	0.0804639591918824	0.0480229587962146	0.0165924078444182	0.00764074830022038	0.00540004914044718	0
X1110025L11Rik	0	0	0	0.0286907822254866	0	0	0	0	0	0.000566692479509108	0	0	0
X1110028F11Rik	0	0	0	0	0	0	0	0	0.00550913497215408	0.00118546073458237	0	0	0
X1110028F18Rik	0	0	0	0	0	0	0	0.0175456142105439	0.0058299383658916	0.00745035693528223	0.00188497718423616	0	0
X1110032A03Rik	1.60334130217083	0.303449478633363	0.304217406486276	0.020967525496511	2.70756714156051	0.0491937204568655	0.763598385593483	0.370266701358588	0.276410792175949	0.554814011811943	0.301607542941615	0.322724957721599	0.370079359875475
X1110032F04Rik	0	0	0	0	0	0	0	0	0.071872469956313	0.0105978726931242	0.0906696251989449	0.0153958797370627	0.00654849685803121
X1110034G24Rik	0	0.0951223968241286	0.11225023271055	0	0	0.252859649791581	0.0278140132561587	0.269569736826564	0.0968308598842578	0.0651589584623394	0.0544961214560008	0.0994859168641975	0.0913372065044576
X1110036E04Rik	0.116144018583043	0.0369344413665743	0	0	0	0	0	0	0.00358813776009065	0.00229627136623685	0	0	0
X1110037F02Rik	0.217438573602957	0.346035001480905	0.234462325473669	0.268631225373817	0.292125632858694	0.72081929326704	0.330360344091962	0.331122405019939	0.466323417102385	0.36541160855208	0.342766425523162	0.317496333064746	0.466739146582303
X1110038B12Rik	0.645536270564552	0.121610396367842	0.261402036744882	0.802999746804399	0.664016201435358	1.35401637903071	0.492868547194272	0.151687608147724	0.270833783253441	0.230254405951419	0.265488909283385	0.351809211182588	0.429544795608918
X1110038F14Rik	0.0773790179055047	0.0529705907280278	0.277392566276065	0.419253916453713	0.55045368143601	0.347470743406991	0.0521457996558377	0.155686112004331	0.35246084324813	0.286800275363015	0.143261014711352	0.298966781543801	0.410848165734874
X1110046J04Rik	0	0	0.0370062951278382	0	0	0.0374094803850063	0.045735611576598	0.0776574528793219	0.0400264327618922	0.0556791228817792	0.0760074079269809	0.0446026775934507	0.0071655001232466
X1110051M20Rik	0	0.0726127481505086	0.156466855707824	0.0250561257216164	0.688802219208045	0.0929098624829041	0.19591181810549	0.180243497765209	0.299957124724742	1.1501237504423	1.32464207187899	0.549813565102547	0.280108107899098
X1110057P08Rik	0	0	0	0	0	0	0	0	0.0069898053688695	0.000806271265280504	0	0	0
X1110059E24Rik	0.201946766832263	0.0690865300363519	0.078887287917859	0	0	0.203209752619341	0.374455391254834	0.176966642789321	0.128586506449389	0.271083845536139	0.346067239547737	0.0957407250324412	0.103107788341265
X1110059G10Rik	0.57824010138776	0.623215057330631	0.195821161533916	0.279154933470677	0.486574285358929	0.517111754013023	0.889441540897591	0.302325331726338	0.473561733198334	0.31466409672035	0.273157248872109	0.315646345251959	0.44903153864949
X1110065P20Rik	0.335135851514253	0.130066034584918	0.268517377244303	0.132258701762017	0.397696609920031	0.151093954954937	0.328730162280552	0.394930226443804	0.662418981952651	0.911981703453609	0.705691400163638	0.842384988752887	0.547717643866874
X1190002N15Rik	0.240979135932467	0.465709848578181	0.357104821888174	0.356306373698517	1.11641284458987	0.421543241829145	0.776093472628556	0.676325013039708	0.434877107380836	0.760172971532959	0.216354929753207	0.892730177674046	1.43329594430382
X1190003K10Rik	0	0	0	0	0	0.00807118136267369	0	0	0	0.000654743782389357	0	0	0
X1190005I06Rik	0	0	0.00982066768964885	0.0510928376393673	0.126732696886699	0.0304192194427998	0.110570180051277	0.626879017214004	0.0338222104574813	0.560087464632097	0.179859124411765	0.56057744503298	0.0438020854396317
X1190007I07Rik	0.234576589256392	0.270585845831737	0.162753560877051	0	0.195526350545785	0.0543062672603666	0.0428503174137262	0.217197331116317	0.285737501689428	0.158282552350094	0.133250698385684	0.0377114725981903	0.186937363223858
X1200007C13Rik	0	0.0500823855241873	0.00352274796887159	0	0	0.00546634480828436	0	0	0.0160056718761658	0.008288673662323	0.0156158179293798	0	0.00641254190596135
X1300002E11Rik	0	0.0348645859481773	0.0210691805151894	0.0185437930215998	0.103211956072991	0.170496022886027	0.0776379432156083	0.0822309451947127	0.0739520680016912	0.0564198720549073	0.0484904275555503	0.0332477614412461	0.0983812876887831
X1300017J02Rik	0	0	0	0	0	0.00959707634666175	0	0	0.00673865345531195	0.0100074934988357	0.010475368545565	0.00854270068939595	0
X1500002F19Rik	0	0	0	0	0	0	0	0	0.00240266676789903	0.0101201876510378	0.00505056667011564	0	0
X1500004A13Rik	0.0532175319837367	0.307420787749455	0.155112842138079	0.427449523287011	0.757337866283247	0.666442519580095	0.368078736214326	0.621726980589453	1.0021928068663	1.00832759094712	0.971393387474627	1.39603578235457	1.67231906472625
X1500009C09Rik	0	0.0253377522373235	0.0162213105845674	0.0564838667018109	1.54714791595898	0.0567134405047823	0.0280734063429054	1.62485285918386	0.98339500947945	2.0523145629289	1.86767883019473	0.145866214202682	0.406818213522693
X1500009L16Rik	1.26917009229958	0	0.0115248250644726	0.0102324819908317	0.158931977113795	0.0558861556677608	0.335968563301467	0.128541543816869	0.22396340481628	0.765619110325567	0.598223098582936	0.0654659581263157	0.0753375119812856
X1500011B03Rik	0.505541920274047	0.178651637941825	0.261995806021187	0.0751083105018161	0.234132442560136	0.283316331341765	0.303341868201772	0.402623112303563	0.782547038664576	2.46209542935062	2.18506971683348	0.828813776554089	0.879217662550858
X1500011K16Rik	0	0.448846184200743	0.521477294887905	0.0621173211675367	1.55039669163204	0.620340833072068	0.478036813588184	0.692492363384845	0.7386021963999	0.770481629591783	0.50605057052007	0.496674245138958	0.467171928053104
X1500012K07Rik	0	0	0	0	0	0	0	0	0.00672843821510682	0.0095319901113862	0.00105391313732235	0	0
X1500015A07Rik	0	0	0	0.0399004085801839	0	0	0	0	0.00549776186114633	0.00627218722469288	0.00299129133610139	0	0
X1500015L24Rik	0	0	0	0	0	0	0	0	0	0.00064340686508691	0.00168354249665312	0.0253769322317504	0.00415472184137272
X1500015O10Rik	0	0	0.029028671618958	0	9.50523937134302	0	0	0.588871845160564	0	0.00796156896689145	0.00334398056746013	0	0
X1500017E21Rik	0	0	0	0.0435698280571708	0	0.0135211145725164	0.0288940512927199	0.0655442034701418	0.044120119736545	0.0229346221917824	0.0393130339021277	0.0509891120649857	0.010653013902919
X1500026H17Rik	0	0.0547040064257765	0	0	0	0	0.102391353067624	0.110881403278672	0.103380650186138	0.0471618564302964	0.0587155361939935	0.0251465429697112	0.0345339778572718
X1500035N22Rik	0	0.0657073395098232	0	0	0	0	0	0	0.00240483641461015	0.0640646968151844	0.0317768859552969	0.0045179055893269	0
X1520401A03Rik	0	0	0.00848562916273146	0	0	0	0	0	0.00415203593005812	0.0131335708285674	0.0333708195358189	0.014266556338631	0.0035631721924341
X1600002D24Rik	0	0	0	0	0	0	0	0	0	0.00164915482123324	0	0.0205185643170365	0
X1600002H07Rik	0	0.0362177119098324	0.0373485062249506	0.0476662599145821	0.108690926481457	0.00727471657704216	0.115064864919612	0.147983953749047	0.0320645257289354	0.137856947915471	0.0972435013270114	0.0495602597675738	0.0360563693171252
X1600002K03Rik	0.197544099983124	0.153640062914571	0.111876326570492	0.133713393992021	0.123005264625326	0.0680547178226469	0.188215001129236	0.0461391290505275	0.069746397085765	0.097752647440489	0.052768825664962	0.0483029214774924	0.0361144304359722
X1600010M07Rik	0	0.18797059764054	0	0.0249202551834131	0	0	0	0	0.0297295794832301	0.01457927864179	0.0123051309621702	0.0101862038055657	0.0131721987936038
X1600012H06Rik	0.196529292691076	0.369288957122662	0.41428792516036	0.212285138250509	0.195419369967951	0.202734422976282	0.161866767374733	0.514936709958361	0.363809148486379	0.101614157508351	0.0655935238690471	0.299556184873617	0.407468694140703
X1600012P17Rik	0	0	0	0	0	0	0	0.0476926305347298	0	0.00315214013924035	0.00333910283376413	0	0.0116323976232685
X1600014C10Rik	0	0.0992913650362257	0.655835375926204	0.0360521458237194	0.292962781696617	0.147102320222565	0.0964106644316379	0.250084827676598	0.165929707325038	0.797887831063669	0.812918925937487	0.105288344892733	0.243243820382689
X1600014C23Rik	0	0	0	0	0	0	0	0	0.006721645243663	0.00621531758906862	0	0	0
X1600015I10Rik	0	0	0	0	0	0	0.0960481008889252	0	0.0056952862393911	0.00637803691942901	0	0	0
X1600019K03Rik	0	0	0	0.015628125625125	0	0.00718886588451806	0	0	0	0.000584175921169648	0	0	0
X1600020E01Rik	0	0.281838357613708	0.0850528701603054	0.0794308876595651	0.0688496598826802	0.170741725439286	0.61307795867448	0.112180556027167	0.143196046192789	0.137691608915333	0.086919858631083	0.132595812443934	0.0694109339731369
X1600025M17Rik	0	0	0	0	0	0.0022843567251462	0	0	0	0.00103672427267127	0	0	0
X1600029O15Rik	0.159261028826246	0.0369344413665743	0.0159330302870973	0.0193714356558393	0.130316930775646	0.060741341070437	0	0.012876824163103	0.0156456300197943	0.0478857082352272	0.0497582024780676	0.0791718230871531	0.00734026841893554
X1700001C02Rik	0	0	0	0	3.29558782897795	0	0	0	0	0.00156938509670426	0.00547033745023699	0.00913796963452691	0
X1700001C19Rik	0	0.0620362788158515	0.0237978798468844	0	0	0	0	0	0	0.0054353076722577	0.00215378359471651	0	0
X1700001D01Rik	0	0	0	0	0	0	0	0	0	0.00181738620833968	0	0	0
X1700001F09Rik	0	0	0	0	0	0	0	0	0	0.00032990087963121	0	0	0
X1700001G01Rik	0	0	0	0	0	0	0	0.0103621037142961	0	0.00518509210824268	0.00113844284698144	0	0
X1700001G11Rik	0	0	0	0	0	0.00238444047673549	0	0.0168212539908425	0	0.00691741929831556	0.00953419712300338	0	0.0089165023058075
X1700001J03Rik	0	0	0	0	0.274562236888207	0	0	0	0.00340639018360102	0.00172644992187392	0	0	0
X1700001J04Rik	0	0	0	0	0	0	0	0.0164195524030015	0	0.00293434706134899	0.00122753006221122	0	0
X1700001K19Rik	0	0	0	0	0	0	0	0	0	0.00542244302040392	0	0	0
X1700001L05Rik	0	0	0.0248343286562306	0	0	0	0	0	0	0.00309554369062781	0.0111054097231991	0	0
X1700001L19Rik	0	0	0	0	1.62981278145662	0.0102304720749034	0	0	0	0.028213782985621	0.128258234578926	0.0069371098959607	0
X1700001N15Rik	0	0	0	0	0	0.0120730953484778	0	0	0	0.00183400792148305	0	0	0.00281330038395924
X1700001O22Rik	0	0	0	0	0	0.023010901539699	0	0	0.0613327039730042	0.0157358145685043	0.00993514466782756	0	0
X1700001P01Rik	0	0	0	0	0	0	0	0	0.0109773942520168	0.00139593648109169	0	0	0
X1700003C15Rik	0	0	0	0	0	0	0	0	0	0.00277953413873966	0	0	0
X1700003D09Rik	0	0	0	0	0	0.0037997616789475	0	0	0	0.00571238031637136	0	0	0
X1700003E16Rik	0	0	0.0270772998045725	0.0695062277580071	0.697264734807041	0.00155384508288831	0	0.0236491363140602	0.00203198218032907	0.146739935089758	0.0762577386945526	0	0.0220545979610967
X1700003E24Rik	0	0	0	0	0	0	0	0	0	0	0	0	0
X1700003F12Rik	0	0.0872087221065633	0.0375534804693309	0	0.089937763067957	0	0	0	0.00832744166835297	0.00627464604869432	0.00569457921615256	0	0
X1700003G13Rik	0	0	0	0	0	0	0	0	0	0.00515041362169263	0	0	0
X1700003G18Rik	0	0	0	0	0	0	0	0	0	0	0	0	0.00957088002327638
X1700003H04Rik	0	0	0	0	0	0	0	0	0	0.00438099407617143	0.00260464689843857	0	0.00356605910529003
X1700003I16Rik	0	0	0	0.0361522443313281	0	0.0105928028290534	0	0	0.0243937203242851	0.0194418105099491	0.00424007391565843	0.00787981703064855	0.0143646856986297
X1700003I22Rik	0	0	0	0	0	0	0	0	0	0	0.00226034060620527	0	0
X1700003L19Rik	0	0	0	0	0	0	0	0	0	0.00076253136471512	0	0	0
X1700003M07Rik	0	0	0	0	0	0.0227836103820356	0	0	0	0.00398236060537814	0.0161588161892757	0	0
X1700003P14Rik	0	0	0	0	0	0	0	0	0	0.000409683609542023	0	0	0
X1700006A11Rik	0	0	0	0	0	0	0	0	0	0.00273078965593542	0.00189819307205085	0	0.0034531006772221
X1700006E09Rik	0	0	0	0	0	0	0	0	0	0.000839998716502688	0	0	0.00833994969342345
X1700006F04Rik	0	0	0	0	0	0	0	0	0	0.00117158639823785	0	0	0
X1700006H21Rik	0	0	0.0123791945353284	0	0	0.00815841687552214	0	0	0	0.00157506054089219	0.00187675006943975	0	0.00321681596981855
X1700006J14Rik	0	0.050675504474647	0	0	0	0	0	0	0.00866899689303151	0.0120969449695431	0.00912628288935657	0.00483446782178218	0
X1700007B14Rik	0	0	0	0	0	0.00626981260784078	0	0	0	0.00523993808870851	0.0112768187523439	0.0172879779468757	0
X1700007F19Rik	0	0	0	0	0	0.00477478303385894	0	0	0	0.00322828696628911	0	0	0
X1700007G11Rik	0	0	0	0	1.17122150429268	0	0	0.0136039984872354	0	0.00980406093924127	0.00348227448008791	0.00380807311500381	0.0112194599953551
X1700007J10Rik	0.110382586043226	0	0.0422044613448303	0	0	0.0544078470759051	0	0.0323917088609113	0.0602426604004142	0.0304906367404107	0.0394501573771942	0.0393537736998513	0.0695770614690112
X1700007K09Rik	0	0	0	0.0268194301407484	0	0	0	0.0211018544309674	0.00681278036720205	0.00402485508177761	0.00136328637084443	0	0
X1700007K13Rik	0	0	0	0	2.59403429353332	0.00321561606058735	0	0.252612555689749	0	0.0668144007381515	0.0325562929542813	0.010049216035534	0
X1700007L15Rik	0	0	0.00979001398992999	0	0.484411722114167	0.0280202121678444	0	0	0.0135250496457675	0.042791568319015	0.0143808981353733	0.00712045314563819	0.063713832085745
X1700007M16Rik	0	0	0	0	0	0	0	0	0	0.00335257693300355	0.00164619784269065	0	0
X1700007P06Rik	0	0	0	0	0	0	0	0	0.0232168590691154	0.00102265355930069	0	0	0
X1700008K24Rik	0	0	0	0	0	0.00363812051783552	0	0	0.0104847080533043	0.000776664270446571	0	0.00729623441341923	0
X1700008O03Rik	0	0	0.00360836274148968	0.0475212895377129	0.408574908373485	0.0164560294892048	0.0150477540474696	0.106338326724567	0.0930799564145439	0.0458834790163236	0.0621974352768825	0.00361218172163805	0.0611644244300965
X1700008P02Rik	0	0	0	0	0	0	0	0	0	0.00198160610018282	0	0	0
X1700009C05Rik	0	0	0	0	0	0	0	0	0	0.00162348751920345	0	0	0
X1700009J07Rik	0	0	0	0	0	0	0	0	0	0.000206110814655056	0	0	0
X1700009N14Rik	0	0	0	0	0	0.00996619466768721	0	0.0242671325956125	0.00549776186114633	0.0099902189594369	0.00104929900530651	0.0185727067432026	0
X1700010B08Rik	0	0	0	0	0	0	0	0.0224207203329029	0	0.000354639356599094	0	0	0
X1700010D01Rik	0	0	0	0	0	0	0	0	0	0	0	0	0
X1700010H22Rik	0	0	0.0161203480705555	0	0	0	0	0	0	0.00209827275124845	0.00716022390598698	0	0
X1700010I02Rik	0	0	0	0	0	0.0382813423795854	0	0.0233986890375201	0.0603537110774119	0.0618604122511921	0.0414332149072558	0.00790724309839547	0.0726502540982945
X1700010I14Rik	0	0	0.0190285904571619	0	0	0.023708769201201	0	0	0.0142933724368032	0.0435149722828717	0.00319498642659655	0	0.0557874632486413
X1700010J16Rik	0	0	0	0	0	0	0	0	0	0.000441411652119946	0	0	0
X1700010K23Rik	0	0	0	0	0	0	0	0	0	0.00112201242726047	0	0	0
X1700010K24Rik	0	0	0	0	0.18806183473126	0	0	0	0	0.000896370653393219	0	0	0
X1700010L04Rik	0	0	0	0	0	0	0	0	0	0.000529397454083261	0	0	0
X1700010N08Rik	0	0	0	0	0	0	0	0	0	0.000500302557971934	0	0	0
X1700011B04Rik	0	0	0	0	0	0	0	0	0.0180183751389667	0.00355319903120244	0.00226034060620527	0	0.00423415916373663
X1700011C11Rik	0	0	0	0	0	0	0	0	0	0.000930759198615656	0	0	0
X1700011E24Rik	0	0	0	0	0	0	0	0	0.00654328217577219	0.00487812945361289	0.00512967525116019	0	0
X1700011H14Rik	0	0	0.00322585431912861	0	0	0	0	0	0	0.00184587500658525	0.00219221518082706	0	0
X1700011I03Rik	0	0	0.0622788437103587	0	0	0	0	0	0.00437724497951887	0.00350110612816294	0.00799868530644023	0	0.0388787767581535
X1700011L22Rik	0	0	0	0	0	0	0	0	0	0.000700863039958291	0.00264182924483839	0	0
X1700011M02Rik	0	0	0.0150193449162521	0	0	0	0	0	0	0	0	0	0.00408910319424385
X1700012A03Rik	0	0	0	0	0	0	0	0	0	0.00415189427291713	0	0	0
X1700012B07Rik	0	0	0	0	0	0.0144095964195783	0	0.0280163839813523	0.00567103033547547	0.00229907553406539	0.0028697279740637	0.0199818165469423	0
X1700012B09Rik	0	0	0	0	8.13156257948351	0.00936413760038355	0	0	0	0.00694583247333251	0.0277604417191878	0	0.00281330038395924
X1700012C08Rik	0	0	0	0	1.00674226985703	0	0	0	0.00795910294542523	0	0	0	0
X1700012C14Rik	0	0	0	0	0	0	0	0	0.0107210782831694	0.00757319600844209	0.00289789554825286	0	0
X1700012D16Rik	0	0	0	0	0	0	0	0	0	0	0	0	0
X1700012E03Rik	0	0	0.0140421827168815	0	0	0	0	0	0	0.00159265618997527	0	0	0
X1700012I11Rik	0	0	0	0	0	0	0	0	0	0.0028135743636237	0	0	0
X1700012L04Rik	0	0	0	0	0	0	0	0	0	0	0	0	0
X1700012P22Rik	0	0	0	0	0.237976249970253	0	0	0	0	0.000480298789642712	0	0	0
X1700013D24Rik	0	0	0	0	0	0	0	0	0	0.000727400617526754	0	0	0.00830356505261969
X1700013F07Rik	0	0.0237721675462369	0	0	0.0733848005401121	0	0	0.0459016694437177	0	0.00716543220236288	0.0106194431162427	0	0
X1700013G24Rik	0	0	0	0	0	0	0	0	0	0.00117378086874561	0	0	0
X1700013H16Rik	0	0	0	0	0	0.0367374039422944	0	0	0	0.000399501581826513	0.00110497188730524	0	0
X1700014D04Rik	0	0	0	0	0	0.0543522619894037	0	0	0	0.00253065834682507	0.00376311604595169	0	0.0079465735963967
X1700014F14Rik	0	0	0.0146603920188826	0	0	0	0	0	0	0.00121547592567608	0.00189917940256374	0	0
X1700015E13Rik	0	0	0	0	0	0	0	0	0	0.00072571017821239	0	0	0.00349526182307264
X1700015F17Rik	0	0	0	0	0	0	0	0	0.0194369541583233	0.00577588227113448	0.022914820043599	0	0
X1700015G11Rik	0	0	0	0	0	0.0129948436460412	0	0	0	0	0	0	0
X1700015O11Rik	0	0	0	0	0	0	0	0	0.00723338031614798	0.00720269529371903	0	0	0
X1700016C15Rik	0	0	0	0	0.0820035097502173	0	0	0	0	0.00112388165437907	0	0	0.0171594871372484
X1700016D06Rik	0	0	0	0	0	0	0	0.0836715117185713	0.020737353813729	0.0142801545782721	0.0151392227132587	0.0382398979827228	0.0225780850634877
X1700016F12Rik	0	0	0	0	0	0	0	0	0.0096911056970134	0.000907397274925394	0	0	0
X1700016G14Rik	0	0	0	0	0	0.0156275259293293	0	0	0.0108168799575113	0.00184696222502326	0.00361463769051699	0	0
X1700016G22Rik	0	0	0	0	0	0.121784258639394	0.0903481112727338	0	0	0.00251775485765883	0.0032890625513916	0	0
X1700016H13Rik	0	0	0	0.0638276143790849	0	0	0	0	0	0.00138536764697208	0.000832946845996791	0	0.0232571120248572
X1700016K19Rik	0	0	0	0	3.24722405650237	0	0	0	0.0210802631014214	0.0115922220233944	0.00651224007072856	0	0
X1700016L21Rik	0	0	0	0	0	0	0	0	0.00471181147476872	0	0	0	0
X1700016P03Rik	0	0	0	0.0343557607739666	0	0.0484962242050915	0.270925248162082	0	0	0.00533385980188826	0.00345705439605951	0	0
X1700016P04Rik	0	0	0	0	0	0	0	0	0	0.00167209147358821	0	0	0
X1700017B05Rik	0	0.454245633441548	1.00147850328035	0.463253865405686	0.110380149233962	0.104904181944204	0.567556015075554	0.0532627423544941	0.0522719847548931	0.0898318862338638	0.034511765447721	0.0351031775118194	0.0171558762526132
X1700017D01Rik	0	0	0.0148282591030683	0	0.0688496598826802	0.112573865605016	0.245248461856132	0.0320109605528933	0.128943611968944	0.0697815260532472	0.051954759133964	0.0415102968289163	0.0427337478503444
X1700017G19Rik	0	0	0	0	0	0	0.0634340666311436	0	0	0.00153283066390693	0.00841526206217664	0	0
X1700017I07Rik	0	0	0	0	0	0	0	0	0	0.00429710330520106	0	0	0
X1700017J07Rik	0	0	0	0	0	0	0	0	0	0.000239013476655374	0	0	0
X1700017L05Rik	0	0	0	0	0	0	0	0	0	0.000757139541953291	0.00343512289495669	0	0.00322093556582819
X1700017N19Rik	0	0	0	0	0	0	0	0	0	0.000609246299177956	0.00120685843164402	0	0
X1700018A04Rik	0.100973383416132	0	0	0	0	0.103020468921168	0.0802729279550471	0	0	0.0059626493731484	0.00171836895168496	0	0
X1700018B08Rik	0	0	0	0	0	0.00985307100517089	0	0	0	0.00246429859967201	0	0	0
X1700018B24Rik	0	0	0	0	0	0	0	0	0	0.00112913588359964	0	0	0
X1700018C11Rik	0	0	0	0	0	0	0	0	0	0.000704628438082039	0	0	0.00335185793485329
X1700018F24Rik	0	0	0	0	0	0	0	0	0	0.00164912410895763	0	0	0
X1700019A02Rik	0	0	0	0	0	0	0	0	0	0.00265579543805995	0	0	0
X1700019B21Rik	0	0	0	0.0193714356558393	0	0	0.00744772442228002	0	0	0.002905720186415	0.00562605791509279	0	0.00423415916373663
X1700019D03Rik	0	0	0.00748097913036307	0.03125625125025	0.872605544948573	0.0526366100378317	0	0.877027808497774	1.23648519531426	0.689323370438862	1.00679647097508	0.215994915881949	0.0872458458503013
X1700019E08Rik	0	0	0	0	0	0.0130534670008354	0	0	0	0.00169551822232822	0.00201264909704511	0	0
X1700019G24Rik	0	0	0	0	0.726932146962821	0	0	0	0	0	0	0	0
X1700019N19Rik	0	0	0.010663322648684	0.0102324819908317	0	0	0	0	0	0.000421264771649218	0.00177103368151855	0	0
X1700019O17Rik	0	0	0	0	0	0	0	0	0	0.000677695482956297	0.00121832358674464	0	0.00609718919578074
X1700019P21Rik	0	0	0	0	0	0	0	0	0	0.000312054785586377	0.00184501300365165	0	0
X1700020A23Rik	0	0	0	0	0	0.0127280873248615	0	0	0.00520139813581891	0.000180223628687421	0.00215378359471651	0	0
X1700020D05Rik	0	0	0.00848562916273146	0.0727420856610801	0	0.0139334760121277	0	0	0.0233212661616374	0.00485728624680363	0	0.0115936652213231	0.00758046665352719
X1700020G17Rik	0	0	0	0	0	0.00150573383444155	0	0	0	0.0057398093218295	0.0071751849530757	0.00586377856026645	0
X1700020I14Rik	0.159261028826246	0.720627670307495	0.66369756443804	0.14204643526629	0.907063298967416	1.56935089312494	0.687494298814058	0.885261971224511	0.687390389480248	0.931340267243591	0.960093150173771	0.435655021570415	0.604535060451128
X1700020L24Rik	0	0	0.018558935756388	0	0.131905239276104	0	0	0	0.0559111015548195	0.0153770347340881	0	0.0366739715519352	0.0196200352824292
X1700020M21Rik	0	0	0	0	0	0	0	0	0	0.00258749853459887	0.00612287014151348	0.00410233689621293	0.01331742345145
X1700020N01Rik	0	0	0.0203048983536788	0	0	0	0	0	0	0.00718786174613611	0.00295231886933273	0	0
X1700020N15Rik	0	0	0	0	0	0	0	0	0	0	0	0	0
X1700020N18Rik	0	0	0	0	0	0	0	0	0	0.00126715290698964	0	0	0
X1700021A07Rik	0	0	0	0	0	0	0	0	0	0.00196023165875714	0	0.00476581954224303	0
X1700021F05Rik	0	0.0620362788158515	0.081080306765366	0	0	0.146878287718353	0.134453826259698	0.154601778604794	0.15610544969796	0.171511302413369	0.19247234742709	0.165313166795156	0.0537830943850602
X1700021F07Rik	0	0	0	0	0	0	0	0	0	0.00133558722472332	0.00290335342774718	0	0.0056637071908692
X1700021F13Rik	0	0	0	0	0	0.00238444047673549	0	0	0	0	0.00224248531956986	0	0
X1700021J08Rik	0	0	0	0	0	0	0	0	0	0.00127469565542337	0	0	0
X1700021L23Rik	0	0	0	0	0	0	0.0150477540474696	0	0	0.00354971703197896	0.00910377780907751	0	0
X1700021N21Rik	0	0	0	0	0	0	0	0	0	0.00092836804965655	0	0	0
X1700021P04Rik	0	0	0	0	0	0.00840324835968592	0	0	0	0	0	0	0
X1700022A21Rik	0	0	0	0	0	0	0	0	0	0.000776211167873304	0.00625720457854071	0	0
X1700022A22Rik	0	0	0	0	0	0	0	0	0	0.00134285454960553	0	0	0
X1700022E09Rik	0	0	0	0	0	0.0199095310907238	0	0	0	0	0	0	0
X1700022H16Rik	0	0	0	0	0	0	0	0	0	0	0.00148727192685002	0	0
X1700022I11Rik	0	0	0	0	0	0.0199095310907238	0	0	0.00583504786489763	0.00860506147295919	0.00665197077389239	0	0.0209312909756855
X1700022N22Rik	0	0	0	0	0	0	0	0	0	0.00174314218853601	0.00104929900530651	0	0
X1700023C21Rik	0	0	0	0	0	0	0	0	0	0.000482427988010082	0	0	0
X1700023F02Rik	0	0	0	0	0	0	0	0	0	0	0.00394499690529427	0	0
X1700023F06Rik	0	0	0	0	0	0.0175630866070927	0	0	0	0.0160603950833149	0.0313530850456843	0	0
X1700023G09Rik	0	0	0	0	0	0	0	0	0	0.00457598563446612	0.00235349050884348	0	0.0305388270647301
X1700023H06Rik	0	0	0	0	0	0	0	0	0	0.00161907487651293	0.0217958297317228	0	0.00654849685803121
X1700024B05Rik	0	0	0	0	0	0	0	0	0.00601426342714381	0.000768981710224176	0.00160077554373543	0	0
X1700024B18Rik	0	0	0.0151462139766233	0	0	0	0	0	0	0	0	0	0
X1700024G13Rik	0	0	0	0	1.6364913186562	0	0.0297107068474266	0	0.0146004158198426	0.00403119004081481	0	0	0
X1700024P04Rik	0	0	0	0	0	0	0	0	0	0.000916498124253377	0	0	0
X1700024P16Rik	0	0.0434253951710961	0	0	0	0	0	0	0	0.0012303020084548	0.012987784333454	0.00365957867270741	0
X1700025B11Rik	0	0	0	0	0	0	0	0	0	0.000267304776629436	0.000869248055231326	0	0
X1700025C18Rik	0	0	0	0	0	0	0	0	0.0295400217799643	0.00181631362055009	0.00518164258092271	0	0
X1700025D23Rik	0	0	0	0	0	0	0	0	0	0.00091796627272088	0.0018183934130517	0	0
X1700025F22Rik	0	0	0	0	0	0	0	0	0	0.00208041941298468	0.0138847471510848	0	0
X1700025F24Rik	0	0	0	0	0	0	0	0	0	0.000649029502166242	0	0	0
X1700025G04Rik	0	0	0.0581956632530288	0.237932426115713	0	0.0966079668440376	0.0303645876033535	0.135799601381283	1.5649257373171	0.422033175030324	0.499259712582789	0.256653988536396	0.371116240698214
X1700025H01Rik	0	0	0	0	0	0	0	0	0	0.00204427757218975	0.00330467519008492	0	0
X1700025J12Rik	0	0	0	0	0	0	0	0.0386918107177614	0.00492804560610526	0.00730224434814946	0.00660421808938113	0.00372077794025175	0.00985678375859011
X1700025K24Rik	0	0	0	0	0	0	0	0	0	0.00373398331359434	0.00165140438731906	0	0
X1700025M24Rik	0	0	0	0	0	0	0.0304064121041845	0	0	0.000698527964104136	0	0	0
X1700025N21Rik	0	0	0	0	0	0	0	0	0	0.00182476424046013	0	0	0
X1700025N23Rik	0	0	0	0	0	0	0	0	0.0158195155477486	0.0106599386499292	0.0324200405959559	0.0240196210437534	0
X1700025O08Rik	0	0	0	0	0	0	0	0	0.00393602696650795	0	0	0.0113543464438187	0
X1700026D11Rik	0	0	0	0	0	0.00952860104890841	0	0.0135537167679807	0	0.00847558258218284	0.00456269002377037	0	0
X1700026F02Rik	0	0	0	0	0	0	0	0	0	0	0	0.0274265653712186	0
X1700026J12Rik	0	0	0	0	0	0	0	0.0313421655555869	0	0.00527573772150127	0.00273729321118436	0	0.00346704092217741
X1700026J14Rik	0	0	0	0	0.131905239276104	0	0	0.0245280655623681	0	0.00188076341142417	0.00449565899167764	0	0
X1700027A07Rik	0	0	0	0	0	0	0	0.0136039984872354	0.0153405290641664	0.00465157287351477	0	0	0
X1700027A15Rik	0	0	0	0	0	0	0	0	0	0	0.00186074621877761	0	0
X1700027F06Rik	0	0	0	0	0	0	0	0	0	0.000701797971312604	0	0	0
X1700027F09Rik	0	0	0	0	0	0	0	0.0135537167679807	0	0.0031311268414313	0	0	0
X1700027H10Rik	0	0	0	0	0	0	0	0.0080949964017741	0	0.00372769361549675	0.00104929900530651	0	0.00371622877104314
X1700027I24Rik	0	0	0	0	0	0	0	0	0	0.00617882731664625	0	0	0
X1700028B04Rik	0	0	0	0	0	0.0103155740410642	0	0	0.0165164123635212	0.0234385046079198	0.0221337402881007	0	0.0543207859000611
X1700028D13Rik	0	0	0	0	0	0	0	0	0	0.00239777398362329	0.00260464689843857	0	0
X1700028E10Rik	0	0	0.113417719724731	0	0	0.103135624296006	0	0.0188213859880428	0.0532058908453337	0.0420147909369174	0.0442625789160061	0.0644643478725537	0.0468282973292295
X1700028I16Rik	0	0	0	0	0	0	0	0	0.00288841197997753	0.00358486330694154	0.00111525540017817	0	0
X1700028J19Rik	0.120737950352555	0	0	0.0102324819908317	0	0	0	0	0.0322992011343404	0.00330220728212405	0.00297575474067488	0.0146898962893322	0
X1700028K03Rik	0	0	0.0287069252586494	0.0369734973970658	0	0.0278222934472934	0	0.00714048038295824	0	0.115204246607347	0.0183193213141178	0.0245508013642057	0
X1700028M03Rik	0	0	0	0	0	0	0	0	0.00538874108769583	0.00199116472082289	0.00315491649567019	0	0
X1700028N14Rik	0	0	0	0	0	0	0	0	0	0.00208882208921117	0.0129315504563798	0	0
X1700028P14Rik	0	0	0	0	0.432077924190216	0	0	0	0.00645760389316024	0.02465034512685	0.00539208707478845	0	0
X1700028P15Rik	0	0	0	0	0.112958611964576	0	0	0	0.0216513483377177	0.0104031679367064	0.00235918719395444	0.020954476400021	0
X1700029B22Rik	0	0	0	0	0	0	0	0	0.0196976024078349	0.00215040139483228	0.00184968155882283	0.00522893588540264	0.00555733390240433
X1700029E06Rik	0	0.0411248468099456	0	0	0	0	0	0	0	0.0053069349485423	0.00227653114932041	0	0
X1700029F12Rik	0	0	0	0	0	0.0101586372797607	0	0	0.00203198218032907	0.00237352946017755	0.00147155340120138	0	0.0235036714908232
X1700029H14Rik	0	0	0	0	0	0	0	0	0.00430228731104892	0.00423164049119404	0	0	0
X1700029I15Rik	0	0	0	0	0	0	0	0.0272010221805942	0.0318580294460754	0.010660987001767	0.0123070567777066	0	0.0107944466501112
X1700029J03Rik	0	0	0	0	0	0	0	0	0.00539310620805849	0.00111369144579	0	0	0
X1700029J07Rik	0.13574414942716	0	0.0180377979659892	0.041935050993022	1.50661278578321	0.0218378756114605	0.0382141751661361	0.272182470149547	0.0141216610449929	0.0518174370053013	0.0358939016455973	0.0928960569539929	0.0426352076008974
X1700029M03Rik	0	0	0	0	0	0.00973156452416542	0	0	0	0	0	0	0
X1700029M20Rik	0	0	0.0141961165103674	0	0	0	0	0	0.00957817883182604	0.00345410381219646	0.00261302645950593	0	0.00531009917141212
X1700029N11Rik	0	0	0	0	0	0	0	0	0.00369671827531827	0.00121735471710034	0.00408148605274586	0	0
X1700029P11Rik	0	0	0	0	0	0	0	0	0	0.00250420790899994	0.00534352450326596	0	0
X1700030A11Rik	0	0	0	0	0	0.00363735828852108	0	0	0.00795910294542523	0.00585523350600004	0.00192899894985297	0	0
X1700030C10Rik	0	0.184939463996115	0.0943908339683186	0.0433065410199557	0	0.0361924335998333	0	0	0.00582229087350083	0.0227423960150238	0.0297556724260302	0.0332451168182903	0.00383356206920346
X1700030C12Rik	0	0	0	0	0	0.0539245436632703	0	0	0	0.00257911204703174	0.00335780501629207	0	0
X1700030C14Rik	0	0.109103604783102	0	0	0	0	0	0.0180507431076664	0	0.026812765073407	0.00707470876961568	0	0.00826749650284898
X1700030F04Rik	0	0	0	0	0	0	0	0	0	0	0	0	0
X1700030J22Rik	0	0	0	0	0.137741046831956	0.00906585436611546	0	0.0242829925723985	0.0100419149530139	0.034327028589728	0.0168073135594679	0	0.0193339020486986
X1700030K09Rik	0	0	0.102994753710323	0.0320184426229508	0.0962612144314813	0.076449233276773	0.206225904822348	0.0680124992556236	0.119558232593518	0.139498798123889	0.0628773734695624	0.045493882372356	0.180117576656772
X1700030L20Rik	0	0	0	0	0	0	0	0	0	0.00123194582091422	0	0	0.00668272302251543
X1700030M09Rik	0	0	0	0	0	0	0	0	0	0.00138054007598338	0.00405733889071734	0	0
X1700030N03Rik	0	0.0954609709707686	0.0203403344764601	0	0	0.0525019794071777	0.0788110493823165	0.0174805616154836	0.0656899816406117	0.0199211240783071	0.0231339663254357	0.0251239277489266	0.0221568824208318
X1700030O20Rik	0	0	0	0	0	0.00697233377956269	0	0	0	0.00377408014394003	0	0	0.0200129002279554
X1700031A10Rik	0	0	0	0	0	0	0	0	0	0.00418217849105848	0	0	0.0158085867464088
X1700031F05Rik	0	0	0	0	0	0	0	0	0	0.00191506688294197	0	0	0
X1700031F10Rik	0	0	0	0	0	0	0	0	0	0.000333904811418075	0	0	0.00466745328812749
X1700031L13Rik	0	0	0	0	0	0	0	0	0	0.00169152852808943	0.00100924223670687	0	0
X1700031M16Rik	0	0.0344808562286219	0.0202695854869768	0	0	0	0	0	0.00988939045928638	0.00448593130589472	0.0018183934130517	0.00945653304585473	0
X1700031P21Rik	0	0	0	0	0	0	0	0	0.00843291908023838	0.0100993160049699	0.0070965242206018	0	0.022445271507081
X1700034B16Rik	0	0	0	0	0	0	0	0	0	0.000312088822975729	0.00275223701824843	0	0
X1700034E13Rik	0	0	0	0	0	0	0	0	0	0.000388542956143602	0	0	0
X1700034G24Rik	0	0	0	0	0	0	0	0	0	0.000464334685011601	0.00381698007838928	0	0
X1700034H15Rik	0	0	0	0	0	0	0	0.00411256078878916	0.00315161638525359	0.00250806494156125	0	0	0
X1700034I23Rik	0	0	0	0	0	0	0	0.0448342255065654	0.0331287871034068	0.0102389298214353	0.00401973179705248	0	0.00680618436510143
X1700034J05Rik	0.100973383416132	0	0	0	0	0.0147879992428544	0	0.0157533653126649	0	0.00711429174542987	0.02058274239294	0	0.00473524308843919
X1700034K08Rik	0	0	0	0	0	0	0	0	0	0.002343175493804	0	0	0
X1700034O15Rik	0	0	0	0	0	0	0	0	0	0.002701737267688	0	0	0
X1700034P13Rik	0	0.0620362788158515	0	0	0	0.0172312292446256	0	0	0.0272668816297778	0.0180416395190071	0.0129407577372163	0	0
X1700036A12Rik	0	0	0	0	0	0.006294819112078	0	0.0366703337000367	0.0117792834123335	0.0218366868212991	0.0078934483230193	0	0.00496422777465583
X1700036G14Rik	0	0	0	0.139012455516014	0	0	0	0	0	0.000657671308571038	0	0	0
X1700036O09Rik	0	0	0	0	0	0	0	0.0125966795152798	0	0.00038436731986049	0	0	0
X1700037C18Rik	0	0.0224231334983676	0.0667668292637219	0.084277238403452	0.482903042893074	0.0383645319349279	0	0.0607771553773717	0.0868419414773538	0.107119439573791	0.112907170324606	0.148819402145366	0.0905836848888383
X1700037F24Rik	0	0	0	0	0	0	0	0	0	0.00147341613850719	0	0.0201035331959592	0
X1700037H04Rik	0.201946766832263	0.165948152954616	0.178537781830769	0.0295369050202362	0	0.0187794783207522	0.0586063412061185	0.135491825932197	0.285859798425629	0.532127483875888	0.980814174890892	0.0152240926495104	0.0833145737298694
X1700039E15Rik	0	0	0.0118989399234422	0	0	0	0	0	0	0.000863614935408636	0.00234067932131535	0	0
X1700039E22Rik	0	0	0	0	0	0	0	0	0	0.000867828428584012	0.00127930373126843	0	0
X1700039M10Rik	0	0	0	0	0	0	0	0	0	0.000462234301945313	0.00164601250179415	0	0
X1700039M15Rik	0	0	0	0	0	0	0	0	0	0.00124709756736774	0.00381281938029434	0	0.00236158736456296
X1700040D17Rik	0	0.040790187512492	0	0	0	0	0	0.0780479730947509	0.0109773942520168	0.0188205955908886	0.0399320639720386	0.0141723241003707	0.0157528956165522
X1700040F17Rik	0	0	0	0	0	0	0	0	0	0.00175245461405163	0	0.00701948961291025	0
X1700040L02Rik	0	0	0	0	1.78005991896083	0	0	0	0	0.00522410108847208	0.00475881621411149	0	0.00732499846175032
X1700040L08Rik	0	0	0	0	0	0.0218378756114605	0	0	0.0135458588277685	0	0	0	0
X1700041C23Rik	0	0	0	0	0	0	0	0	0	0	0	0	0
X1700041G16Rik	0	0	0.0276996205170732	0	0	0.0248625475035918	0	0.0202102267789547	0.039540602515249	0.0167104260185089	0.00135872518967804	0	0.00976699758583819
X1700041M05Rik	0	0	0	0	0	0	0	0	0	0	0	0	0
X1700041M19Rik	0	0	0	0	0	0.00723982948753591	0	0	0	0.00232508617338759	0.00434613162859583	0.0261551293274003	0
X1700042D02Rik	0	0	0.00850420405327374	0	0	0	0	0.0235906364045983	0.00801660399018447	0.000658056653413406	0.00151894888736994	0	0
X1700042G07Rik	0	0	0	0	0	0	0	0	0	0.00604813969198699	0.0115355382945944	0	0
X1700042G15Rik	0	0	0	0	0	0	0	0	0	0.000561576119537093	0	0	0
X1700042O10Rik	0	0	0	0	0	0.00363812051783552	0.0639856672105449	0	0	0.00167625169192517	0.00251243908591436	0	0.011609385956358
X1700044C05Rik	0.20033255203638	0	0	0	0	0	0	0	0	0.00526708215614245	0.00914196377150296	0	0
X1700044K03Rik	0	0	0	0	0	0	0	0	0	0.000981360323327602	0.0194413338310315	0.0112831796000113	0
X1700045H11Rik	0	0	0	0	0	0	0	0	0	0.000959002708550499	0	0	0
X1700046C09Rik	0	0	0	0	0	0	0	0	0	0.00150394660539423	0.0035701790087755	0	0.00629222080157859
X1700047A11Rik	0	0	0	0	0	0	0	0	0	0.000362043569409273	0	0	0
X1700047F07Rik	0	0	0	0	0	0	0	0	0	0.00218707231362222	0.00666523899843881	0	0.00396925573279606
X1700047G03Rik	0	0	0	0	0	0	0	0	0.0111895623762155	0.000975489972721419	0.00114075242204554	0	0
X1700047I17Rik2	0	0.0556065282064114	0	0	0	0.10242635124407	0.0299661382637619	0.0600359739434773	0.0849542711850887	0.0792580723764653	0.0438972029140596	0.235857836949961	0.156794903583773
X1700047K16Rik	0	0	0	0	0	0	0	0	0.0134299874860735	0.00183808445595691	0.00183736119654841	0	0
X1700047L14Rik	0	0	0	0	0	0	0	0	0	0.000467139645557794	0	0	0
X1700047M11Rik	0	0	0.0104529252511315	0.0188616610333172	0	0.00622485159953787	0	0.0471307394930853	0.273239461521928	0.0106187487196862	0.00772904862488898	1.30728356258041	2.231750347674
X1700048F04Rik	0	0	0	0	0	0	0	0	0.00509394767700704	0.00188108786586867	0	0	0
X1700048M11Rik	0	0	0	0	0	0	0	0	0	0.000430295095249201	0	0	0
X1700048O20Rik	0	0.136446920352023	0.00862057075074826	0	0	0.0394807343403051	0	0.0590470361759343	0.0255992472622474	0.116142473075399	0.0886288720459767	0.0129763959357928	0.0727711006245534
X1700049E15Rik	0	0	0	0	0	0	0	0	0	0.00206170056541934	0.00224852092293689	0	0
X1700049E17Rik1	0	0	0	0	0	0	0	0	0	0.00684362459985894	0.00259539908413557	0	0
X1700049E22Rik	0	0	0	0.0361522443313281	0	0	0	0	0	0.00123882814953603	0	0	0
X1700049G17Rik	0	0.0423151462834607	0.0750548866930938	0.0780388676627129	0	0.0614446563456642	0.0990413035144949	0.0146032302345279	0.091375439445797	0.0900607136595031	0.0818792232520404	0.007815861248314	0.0477449194596796
X1700049J03Rik	0	0	0	0	0	0	0	0	0	0	0.00412757849828788	0	0
X1700051A21Rik	0	0	0	0	0.113579573849439	0	0	0	0.00382302016299064	0.0177882186269014	0.0205787244852001	0.0160210195776859	0
X1700052I22Rik	0	0	0	0.015628125625125	0	0	0	0	0	0	0.00184083140782368	0	0
X1700054A03Rik	0	0	0	0	0	0	0	0	0	0.00503911308371336	0	0	0
X1700054K19Rik	0	0	0.014514335809479	0	0	0	0	0	0	0.000326214836283376	0	0	0
X1700054M17Rik	0	0	0	0.0343557607739666	0	0	0	0	0	0.00116867956066209	0	0	0.00629222080157859
X1700055C04Rik	0	0	0	0	0	0	0	0.0534033985922864	0	0.000789657655115502	0	0	0
X1700056E22Rik	0	0.0523072738495015	0	0	0	0	0	0	0.0147187684904529	0.00191178904104216	0.00308696854749486	0	0.00379595381690748
X1700056N10Rik	0	0	0	0	0	0.0212803588081675	0.0941281060931004	0.0144371392519829	0.0279576179958807	0.0206658530345014	0.0127810923177384	0	0.00658277577222543
X1700057G04Rik	0	0.0501826649002369	0	0	0	0.0123049125127403	0	0	0	0.00552296290087358	0.00176185623535017	0.0087658168207259	0
X1700057H15Rik	0	0	0.0205013397625535	0	0	0	0	0	0.00174813958614893	0.000494338342958101	0	0	0.0101105534292799
X1700057H21Rik	0	0	0	0	0	0.0103463117467885	0	0	0	0.00285044798997683	0	0	0
X1700058P15Rik	0	0	0.0138174412033333	0	0	0.0218378756114605	0	0	0	0	0	0	0
X1700060C16Rik	0	0	0	0	0	0	0	0	0	0	0	0	0
X1700060C20Rik	0	0	0	0.0390234765234765	0	0	0	0	0.00837984847557986	0.00402506737894198	0.00649615700419364	0	0
X1700060J05Rik	0	0	0	0	0	0	0	0	0	0.00150059954096945	0	0	0.00452180141333425
X1700060O08Rik	0	0	0	0	0	0	0	0	0	0.000749013175141751	0	0	0
X1700061E17Rik	0	0	0.03315792789477	0	0	0	0	0	0	0.00399166661583135	0.0138180901626906	0	0.0112892810534254
X1700061E18Rik	0	0	0	0	0	0	0	0	0	0	0.00117674525442174	0.0176488237059	0
X1700061F12Rik	0	0	0	0	0	0.00493073306194579	0	0	0.00996675091893443	0.00215648274730637	0	0	0
X1700061G19Rik	0	0	0	0	0	0.0119156562190193	0	0	0.00322880194658012	0.00300154428372722	0.00116725613101283	0	0
X1700061H18Rik	0	0	0	0	0	0	0.043199716609859	0	0.00751637912163195	0.00125170721692458	0.00364767540941509	0	0.0137544014084507
X1700061I17Rik	0	0	0.0106682028878825	0	0	0	0	0	0	0.00105129315589279	0	0	0
X1700061J23Rik	0	0	0	0	0	0	0	0	0	0.000255193571980154	0.00127930373126843	0	0
X1700063A18Rik	0	0.0462410639143985	0	0.0577537715285446	0	0.129802561806861	0.135131979646794	0	0.0688821541755611	0.00559409461371952	0	0.00522893588540264	0
X1700063D05Rik	0	0.0506462461002391	0	0	0	0.012098335269067	0	0.0107467601204927	0.044014310837276	0.0349317208429619	0.0200540231827952	0.10014659252639	0.0162474532065901
X1700063H04Rik	0	0	0	0.0652673350041771	0	0.013605886450714	0	0	0	0.00017309318385006	0	0	0
X1700063H06Rik	0	0	0	0	0	0	0	0	0	0.000794786202511524	0	0	0
X1700063K16Rik	0	0	0	0	0	0	0	0	0	0.00165003693175133	0.00435883894606385	0	0
X1700063O14Rik	0	0	0	0	0	0	0	0	0	0.000498775212860376	0.00343512289495669	0	0
X1700064H15Rik	0	0	0	0	0	0	0	0	0	0	0	0	0
X1700064J06Rik	0	0	0	0	0	0	0	0	0.0178493019138021	0.0006073172720639	0	0	0.0069808222850186
X1700064M15Rik	0	0	0	0	0	0	0	0	0.0044698151150374	0.0164411312988179	0.00232238629891962	0	0
X1700065D16Rik	0	0	0	0	0	0	0	0.0270963056896823	0	0.00508993429494421	0.0116070237631098	0	0.0172368005362253
X1700065I16Rik	0	0	0	0.0360189027201475	0	0	0	0	0	0.00232038400611362	0.00138879861697879	0	0.00304622091925199
X1700065J11Rik	0	0	0	0	0	0	0	0	0	0	0	0	0
X1700065L07Rik	0	0	0	0	0	0	0	0	0	0.00341889088795781	0	0	0
X1700065O20Rik	0	0	0	0	0	0	0	0	0	0.000273018161168081	0	0	0
X1700066B17Rik	0	0	0	0	0	0	0	0	0	0.00020049263044226	0	0	0
X1700066B19Rik	0	0	0	0	0	0.0280269010341251	0	0	0.00822457024564324	0.0134627065040737	0.0107202629716247	0.00787981703064855	0
X1700066C05Rik	0	0	0	0	0	0	0	0	0	0.000726753957084452	0	0	0
X1700066J03Rik	0	0	0	0	0	0	0	0.0433362654259386	0.0217930920256897	0.000418798350269539	0	0	0
X1700066M21Rik	0.0567298637348673	0.169110846875413	0.0301590294959579	0	0.113522840795568	0.0277322765317262	0	0.252887343189559	0.557080769630234	0.0788259543241019	0.146297095496851	0.401839431555039	0.462739238336212
X1700066N21Rik	0	0	0	0	0	0	0	0	0	0.00347571327305246	0	0	0.0197594094307709
X1700066O22Rik	0	0	0	0	0	0.002375305939405	0	0	0.00623972784803018	0.0055738105211792	0.00822248389972221	0	0.00335185793485329
X1700067G17Rik	0	0	0	0	0	0	0	0	0	0.000603709982336494	0	0	0
X1700067K01Rik	0	0	0	0	0	0	0	0	0	0.00584718840758491	0.00164619784269065	0	0
X1700067P10Rik	0	0	0	0	0	0.0225762173096373	0	0	0	0	0	0	0
X1700069L16Rik	0	0	0	0	0	0	0	0	0.00955112921093196	0.00403567512337571	0.00174357579498338	0	0
X1700069P05Rik	0	0	0	0	0	0	0.0304064121041845	0	0	0.00478332775548445	0	0.00540004914044718	0
X1700071G01Rik	0	0	0	0	0	0	0	0	0	0.000759605681718394	0	0	0
X1700071M16Rik	0	0	0	0	0	0.0160602322951999	0	0	0.019684678710238	0.00778639182968106	0.00541519688582014	0.004229384920551	0
X1700072B07Rik	0	0	0	0	0	0	0	0	0	0	0	0	0
X1700072G22Rik	0	0	0	0	0	0.0140758572207284	0.0977493218640795	0	0	0.00065607053348309	0	0	0
X1700073E17Rik	0.405944491126305	0.757588762205569	1.0844896625563	0.500263405099368	0.402526902298585	0.654828369071969	0.567058493490507	0.275771433355306	0.282107694125723	0.361752098683397	0.285546633615316	0.455401162249018	0.197403308811646
X1700074H08Rik	0	0	0	0	0	0	0	0	0	0	0	0	0.00383356206920346
X1700074P13Rik	0	0.0235046351140445	0	0	0	0	0	0	0.0149104511295834	0.0038481181036434	0	0.0076190766441015	0
X1700080E11Rik	0	0	0	0	0	0	0	0	0.00509394767700704	0.00143755390485143	0	0	0
X1700080G11Rik	0	0	0	0	0	0	0	0	0	0.000496913916123912	0	0	0.00778493645934862
X1700080N15Rik	0	0	0	0	0	0	0	0	0	0.00108397647772277	0	0	0
X1700080O16Rik	0	0	0	0	0	0.0184496398630299	0	0	0	0.00134874737268929	0.00164249893730319	0	0
X1700081H04Rik	0	0	0	0	0	0.0304038416139854	0	0	0	0.00143114040290914	0	0.00871949810568904	0.00452180141333425
X1700082M22Rik	0	0.0463632654575127	0	0.0102324819908317	0	0.022303102214312	0.0214251587068631	0.0167444446118889	0.026209178841351	0.0308541521513418	0.0165272809217187	0.00361218172163805	0.0484615027098755
X1700083H02Rik	0	0	0	0	0	0	0	0.00502256891341242	0	0.00516171174034893	0.00197539292540679	0	0
X1700084C06Rik	0	0	0	0	0	0	0	0	0	0.00946794495022611	0.00861296477104102	0	0.00555733390240433
X1700084F23Rik	0	0	0	0.0202974798649	0	0	0	0	0	0.0017121608706209	0.00325208902643091	0	0
X1700084M14Rik	0	0	0	0.0204301778242678	0	0	0	0	0	0.00117753189768635	0.00312925578787151	0	0
X1700085C21Rik	0	0	0	0	0	0	0	0	0	0.00101255249173372	0.00212962608025283	0	0.00980815253638825
X1700086D15Rik	0	0	0	0	0	0.0101113052481719	0	0	0.017353321555948	0.000897536329677493	0.00678206677025381	0	0.0128660141029952
X1700086L19Rik	0	0	0	0	0	0.00155384508288831	0	0	0.289768931610102	0.0631860512614095	0.0490537070547388	0	0.00974032298911032
X1700086O06Rik	0.217438573602957	0.150345595098749	0	0	0	0.0317933571467412	0.0144187166477061	0.0202102267789547	0.0140161792743587	0.0971972144567306	0.0581033448136306	0.0524083397285548	0.0335239513176377
X1700086P04Rik	0	0.0390731840737702	0.010825088224469	0	0.110380149233962	0.0116836259918177	0	0	0.0265945786677158	0.0350225452497449	0.0132796388725873	0	0
X1700087M22Rik	0	0	0	0	0	0	0	0	0	0.000182348500990471	0	0.00682591526991375	0
X1700088E04Rik	0.340622658219225	0	0.0297321725893154	0	6.3181248571101	0.0194256849731127	0.0369560075685903	0.0444875437108241	0.04137804736561	0.187368305378204	0.108154463321549	0.0289502634473974	0
X1700091H14Rik	0	0	0	0	0	0	0	0	0	0.00812731104189095	0.00445721152547899	0	0
X1700092C02Rik	0	0	0	0	0	0	0	0	0	0	0	0	0
X1700092C10Rik	0	0	0	0	0	0.00865890828484344	0	0	0	0.000950135899237644	0	0.00627837038618256	0
X1700092C17Rik	0	0	0	0	0	0	0	0	0	0.00037134721986262	0	0	0
X1700092E19Rik	0	0.0328536697549116	0.0278605188597294	0	0.145315043013253	0.0521976281513829	0.0303645876033535	0.0377612131922574	0.0260268643769082	0.0269417578126565	0.00356107192719857	0.018093113659192	0
X1700092K14Rik	0	0	0	0	0	0	0	0	0	0.000891389137413183	0.00396409103808704	0	0
X1700092M07Rik	0	0	0	0	0	0	0	0	0.0171359321857398	0.00464984171356427	0.00536115989766618	0	0
X1700093J21Rik	0	0	0	0	0	0	0	0	0.0203664411558526	0.00447661262954894	0.00482996947007649	0.0162045664468247	0
X1700093K21Rik	0	0	0	0	0	0.00607244180171777	0	0.0733406674000733	0	0.00334028025872545	0.0043626946559863	0	0
X1700094J05Rik	0	0	0	0	0	0	0	0	0	0.000681718692107455	0.00312925578787151	0	0
X1700094M24Rik	0	0	0	0	0	0	0	0	0.0125975205560042	0.000415333187551384	0	0.0191693903175409	0.00417838704232038
X1700095A13Rik	0	0	0	0	0	0	0	0	0	0.00246244390631776	0	0.0275410016662306	0.00415178252630984
X1700095A21Rik	0	0	0	0	0	0	0	0	0	0.000881389909941453	0	0	0
X1700095B10Rik	0	0	0	0	0	0	0	0	0	0.00167443241707488	0	0	0
X1700095J03Rik	0	0	0	0	0	0	0	0.0331104840879086	0	0.0201362805816481	0.0192101713697527	0	0
X1700095J07Rik	0.102011670135063	0.0909951226614253	0.0714489086532441	0.0754653538739515	0.0940309173656298	0.185391873036682	0.0519005999709357	0.0681519433434392	0.18380913299098	0.148934180112877	0.146627228382614	0.144546715681593	0.203907720933047
X1700095J12Rik	0	0	0	0	0	0	0	0	0	0.00248281663362184	0.00481392263448656	0	0
X1700095K22Rik	0	0	0	0	0	0	0	0	0.00550685658713664	0	0	0	0
X1700096J18Rik	0	0	0	0	0	0	0	0	0	0.00101392786846187	0	0	0
X1700099I09Rik	0	0	0	0.0533276450511945	0	0.00807118136267369	0	0	0.00366618370806619	0.000371443636121185	0	0	0
X1700100L14Rik	0	0	0	0.0475212895377129	0	0	0	0	0	0.00201215857820555	0.00194827865684111	0	0
X1700101I11Rik	0	0	0	0.0448455030526081	0	0	0	0	0	0.0209769345969075	0.0315491768102702	0.0203514698849124	0.0194495300725905
X1700101O22Rik	0	0	0	0	0	0	0	0	0	0.000227859387516245	0	0.00484748597258747	0
X1700102P08Rik	0	0	0	0	0	0.112079363197718	0	0.0259223584667869	0.0190543499286156	0.0817445175617178	0.0223492821390252	0.0265222253654076	0.00800897848201446
X1700104B16Rik	0	0	0	0	0.131068470168816	0.00457352768996605	0	0	0.00490625616348431	0.00341547697888249	0.00349340096557603	0	0
X1700108F19Rik	0	0	0	0	0	0.0853465257800743	0	0	0.00240266676789903	0.00313731395728233	0.00394279477910887	0	0
X1700108J01Rik	0	0	0	0	0	0	0.0719057172235765	0	0	0.00515158480720491	0.0043484781419466	0	0
X1700108N11Rik	0	0	0	0	0	0	0	0	0	0.00156188203563349	0.00293689896362709	0	0
X1700109G14Rik	0	0	0	0	0	0	0	0	0	0.000894242034472184	0	0	0
X1700109G15Rik	0	0	0	0	0	0	0	0	0	0.000748957677570752	0.00299956566289201	0	0
X1700109H08Rik	0	0.0167467159689985	0.038689990076273	0	0	0.132676194058236	0	0.0803137554324117	0.0387806724924771	0.0756759964378247	0.0425782932042561	0.0342335644238664	0.121370170857007
X1700109I08Rik	0	0	0	0	0	0.00442546803749965	0	0	0.00288841197997753	0.00089707804811234	0.00414678161415874	0	0
X1700109K24Rik	0.100973383416132	0	0	0	0	0	0	0	0	0.000998881625200554	0	0	0
X1700110C19Rik	0	0	0	0	0	0	0	0	0	0.000843809158336527	0	0	0
X1700110I01Rik	0	0	0	0.214559805822782	0.159377789111309	0.0155565511748307	0	0	0	0.00232183453285044	0	0	0.00415178252630984
X1700110K17Rik	0	0.0496149876954831	0	0.0446939359267735	0	0	0	0	0	0.00111215438671069	0	0	0.00864716787957608
X1700111E14Rik	0	0	0	0	0	0	0	0	0	0.00256411354819878	0	0	0.0186007752803137
X1700111N16Rik	0	0	0	0	0	0	0	0	0	0.00675377625942302	0.00490387586334586	0	0.0067081858650474
X1700112D23Rik	0	0	0	0.0468375299760192	0	0	0	0.016452293285161	0	0.00551347633850462	0.0047172117246424	0	0
X1700112E06Rik	0	0	0.0118868043396345	0	0	0.0312868009752298	0	0	0.0123367856041851	0.00310434394493521	0.011590894916025	0.00570497844944391	0
X1700112H15Rik	0	0	0	0	0	0	0	0	0	0.000633576246466229	0.00625315784471158	0	0
X1700112J05Rik	0	0	0	0	0	0	0	0	0	0.000735061236203162	0.00158309507752417	0	0.010089188425683
X1700112J16Rik	0.524262334034965	0.0237721675462369	0.032587055511345	0	0.113579573849439	0.0904269445276369	0	0	0.0453220357509665	0.0455356930681568	0.0392399968980589	0.00771706165160553	0.0226508971798325
X1700112K13Rik	0	0	0	0.0620532168387609	0	0	0	0	0.0114186910881639	0.000637618277184447	0	0	0
X1700113A16Rik	0	0.041105575560269	0.00864294523916326	0	0	0	0	0.117892800206972	0.00766584872060818	0.0250004415045523	0.0185332137689882	0.0666968668165719	0.0120495150371895
X1700113H08Rik	0	0	0	0	0	0	0	0	0	0.00196550281615529	0	0	0.00945268929010304
X1700116B05Rik	0	0	0	0	0	0	0	0	0	0.00116720065240495	0	0	0.0124125230186863
X1700119I11Rik	0	0	0	0	0	0	0	0	0	0	0.00177792570119612	0	0
X1700120B22Rik	0	0	0	0	0	0	0	0	0	0.000227859387516245	0	0	0
X1700120C14Rik	0	0.0654133469393095	0	0	0	0.0382310028992199	0.145187433314134	0	0.0185170848567622	0.0163439532576781	0.00905186899742958	0	0
X1700120C18Rik	0	0	0	0	0	0.0185284003320289	0	0	0	0.00138403277441264	0.00174586613815807	0	0
X1700120G07Rik	0	0	0	0	0	0.0230865839243499	0	0	0	0.00298908790435754	0.00151926457871097	0	0
X1700120G11Rik	0	0	0	0	0	0	0.0684144272344152	0	0	0.000244069805428771	0	0.0045179055893269	0
X1700120O09Rik	0	0	0	0	0	0	0	0	0	0.0015529456799391	0	0	0
X1700121L03Rik	0	0	0	0	0	0	0	0	0	0.00135622404608533	0.00436154028667532	0	0
X1700121L16Rik	0	0	0	0	0	0	0	0	0	0.00124080381060384	0.0025359727737963	0	0
X1700121N20Rik	0	0	0	0	0	0	0	0	0	0	0	0	0
X1700122D07Rik	0	0	0	0	0	0.00957590243304529	0	0	0	0.00866139262585098	0.00343512289495669	0	0
X1700122E12Rik	0	0	0	0	0	0	0	0	0.0250956817798276	0.000759935510586652	0	0.0210659363808721	0
X1700122O11Rik	0	0.0373432517009851	0	0	0	0	0	0	0	0.00199960415502971	0	0.0319902749564133	0
X1700123I01Rik	0	0	0.0176323928215002	0.0599118098159509	0.227500227500227	0.0165645620789623	0.0727749072119933	0	0	0.00231938368731178	0	0	0
X1700123K08Rik	0	0	0	0	0	0	0	0	0.0101028673958243	0.00104902128086229	0	0	0
X1700123L14Rik	0	0	0	0	0	0.00919550376647834	0.0511391239868061	0	0.0284656141907062	0.00874369350115677	0.0174118636210413	0.0351173539739212	0
X1700123M08Rik	0	0	0	0	0	0.0194195873726075	0	0.0508809084688681	0	0.00795677006177633	0.0171105422661566	0	0.0116055595272359
X1700123O12Rik	0	0	0	0.015628125625125	0	0.0481136461100627	0	0	0	0.000765767494476826	0.00715446939703233	0	0
X1700123O20Rik	0.238041685410106	0.122567824577109	0.319704730385189	0.176586138969787	0.813381826004946	0.404796937264222	0.0601500141352533	0.539543398318376	0.43967304653072	0.375386660365907	0.218306179014524	0.283750378613764	0.378436927921948
X1700123O21Rik	0	0	0	0	0	0	0	0	0	0.000892261262740246	0.00266057926131677	0	0
X1700124L16Rik	0	0	0.00263658220902876	0	0.110380149233962	0	0	0	0.020015018070158	0.0335524418596795	0.0330773718262905	0	0.00680016755612858
X1700125G02Rik	0	0	0	0	0	0	0	0	0	0	0	0.0076190766441015	0
X1700125G22Rik	0	0	0	0	0	0	0	0	0	0.00721512090433811	0	0	0.00850103032487538
X1700125H03Rik	0	0	0	0	0	0	0	0	0	0.000713709921596998	0	0	0
X1700125H20Rik	0	0	0	0	0	0	0	0.0447805974627313	0.0037090749937873	0.00150171748470121	0.00207462509449917	0.0256502334171241	0
X1700126G02Rik	0	0	0	0	0	0	0	0	0	0.00574930060819671	0	0.0041487492558181	0
X1700126H18Rik	0	0	0	0	0	0	0	0	0	0	0	0	0
X1700128A07Rik	0	0	0	0	0	0	0	0	0.0125500275473105	0.00230679310028188	0.000832946845996791	0	0.00901927961209882
X1700128E19Rik	0	0.0445501768642022	0	0	0	0.0219192215384996	0	0.0125966795152798	0	0.00163680999862824	0	0	0
X1700128F08Rik	0	0	0	0	0	0	0	0	0.011439501054722	0.0044320684990357	0.00120685843164402	0	0
X1700129C05Rik	0	0	0	0	0	0	0	0.00921879897486955	0	0.000930008179912391	0.00265961124994282	0	0
X1700129L04Rik	0	0	0	0	0	0	0	0.0178299839708444	0	0.00246253020861401	0	0	0.00333914344292402
X1810006J02Rik	0	0	0	0.0279417024320458	0	0.00363051257028672	0	0	0	0.0091371131209922	0.00395306906437206	0	0
X1810007C17Rik	0	0	0	0	0	0	0	0	0	0.000773883331878627	0	0	0
X1810007D17Rik	0	0	0	0	0	0	0	0	0	0.00216649918500045	0	0	0
X1810008B01Rik	0	0	0	0	0	0	0	0.0154005134531185	0	0.00179448022817835	0.00618320083512101	0	0
X1810009A15Rik	0	0.10094746118756	0.0833423954265098	0.0234468787515006	0.977551427146709	0.347309051839348	0.178261094775937	0.1602270365127	0.178061847433051	0.230408649532172	0.174793843836413	0.128509745503421	0.216394638016963
X1810009J06Rik	0	0	0	0	0	0	0	0	0	0	0	0	0
X1810010H24Rik	0.374080177612982	0	0.117870573461922	0	0.163322563608069	0.0044883948063886	0.0363076565586151	0.0572590564527046	0.828637767652985	0.0658416121123447	0.0710859955917946	0.0344498212795965	0.00363489910247071
X1810010K12Rik	0	0	0	0	0	0	0	0.0759861097391397	0	0.00553495745958872	0.0012877550463257	0.00478539879120827	0.00839662992861185
X1810011H11Rik	0.0761904761904762	0.364016030013277	0.485813280932726	0.150529865125241	0	0	0.00744772442228002	0.0189239107396978	0	0.00710563264330315	0.00172201213674154	0	0.00452180141333425
X1810011O10Rik	0.167112449778093	0	0.097491204978506	0	0	0.980236470244272	2.02089478137297	0	0.00681103796813115	0.0061604418096175	0	0.0278060159588555	0.00423415916373663
X1810012K08Rik	0	0	0	0	0	0	0	0	0	0.00017309318385006	0	0	0
X1810012K16Rik	0	0	0	0	0	0	0	0	0	0.000282228282604211	0	0	0.00654849685803121
X1810013L24Rik	0.531904785633598	0.530521986194011	0.103094921642941	1.10243561097327	0.183284571948588	0.808734929233899	0.440755835198243	0.682959792495815	0.234208588835609	0.460064947376065	0.348889066896006	0.0985192532524456	0.280134127475541
X1810014B01Rik	0	0.104263803236578	0	0	0	0.00346183671208596	0	0.061052543982261	0.044746966453062	0.0111997762901717	0	0	0.0435012838616594
X1810018F18Rik	0	0	0	0	0.180949623624783	0	0	0	0	0.0059225051927161	0	0.00483446782178218	0
X1810019D21Rik	0	0	0	0.0335300429184549	0	0.0434157420684819	0.0683438241103343	0	0.00732833199102719	0.00732222724984133	0.0061804049674674	0.0283695991375642	0.0564735647243525
X1810019N24Rik	0	0.0506462461002391	0	0.103203434610304	0	0.00986146612389157	0	0.0167444446118889	0	0.0139579212499185	0.00178052405808497	0	0
X1810020O05Rik	0	0	0	0	0.984263075988698	0	0	0	0.0068495777920249	0.0052952457639647	0.0148145742600502	0	0
X1810021B22Rik	0.613647520864016	0.0354851530119798	0.029816807296373	0.0325928243637881	1.88712146958626	0	0	0.168649092640279	0.0233714487849289	0.0180785761287103	0.0188252655393232	0.039309428653475	0.0181163747200424
X1810022K09Rik	0.0814000814000814	0.427850745826238	0.267277124587734	0.0742016006678878	1.22278858489984	0.471478981279592	0.415087421665614	0.330972794902264	0.532636621621116	0.479280524794624	0.432858104593504	0.388086586812414	0.592053241822721
X1810024B03Rik	0.336471844263226	0.0257543447579607	0.0454721875185634	0.020967525496511	0	0.00301146766888311	0	0.052292949291942	0.0523000913393877	0.018076817684051	0.0125532506681641	0.0268964120946737	0.0776663081109661
X1810026B05Rik	0.667723893375189	0.645557828335113	0.513897477446001	0.0857495292804474	0.566364950243675	0.986922094527259	1.5819124275109	0.547808594919633	0.528347580103734	0.636059926166254	0.369439890443568	0.247676906532354	0.378485464938002
X1810026J23Rik	3.25004901620764	0.0422539972281378	0.430672700462954	0.67398156953688	0.215537418979821	0.25549100219044	0.55084942209083	0.845791569088679	0.852135016716851	0.806207036663799	0.948069742790944	0.470772221434326	0.495245993326871
X1810030O07Rik	0.764431438095907	0.339769552714437	0.608824854038367	0.353781210797491	0.299735393304178	0.337004076145	0.0855433036252326	0.301836191974906	0.411522588578293	0.249382681544927	0.296142985608429	0.205995916862112	0.274139905830129
X1810032O08Rik	0	0	0.0343564925642534	0.374246864798018	0	0.0695493854619491	0.117066348364472	0.0165637642810705	0.0639521295599698	0.19474995655645	0.0892242555538248	0.0271800671614328	0.163335238728835
X1810034E14Rik	0	0	0.0133352536098532	0.0426446506550218	0	0.0121832358674464	0	0	0.00428981289552075	0.00187880792385937	0.00435115566694514	0.0213059650245388	0.00827721382360926
X1810037I17Rik	1.0062719461404	0.938050159596225	1.06481175240257	1.14765616448981	3.289897977463	2.44436100264449	1.4897857099584	1.69512107325375	1.86859166268944	1.03267415097634	0.912528895862393	3.11222893579866	2.29252799552274
X1810041H14Rik	0	0	0	0	0	0	0	0	0	0.00778322584205605	0.0133898029432626	0	0
X1810041L15Rik	0	0	0.328793981744218	0.270509728697847	0.61782689997483	0.153064711690912	0.0528954996508897	0.707617174963874	3.70448253412593	6.280684667313	5.37724317307589	0.241044612339489	9.49019736786213
X1810043G02Rik	0.789702282239596	0.0463632654575127	0.102608928061738	0	0.124396676120814	0.115731766257825	0.226850551509955	0.252864814399039	0.091003537494187	0.356374506652843	0.376006119265961	0.120779795991223	0.0833480818811068
X1810043H04Rik	0.175643664251043	0.181509558108195	0.454790992141216	0	2.59130082907316	0.508430931980235	0.401390213780625	0.362925348068558	0.310063981165208	0.479773857213396	0.421828246828446	0.29601970623919	0.253532930069072
X1810044D09Rik	0	0.0237721675462369	0.014514335809479	0	0	0.00698940540443095	0	0.00714048038295824	0.0210142287244229	0.0178230511940251	0.00937267743959357	0.0041487492558181	0
X1810046K07Rik	0	0	0	0	0	0.00855227148330597	0	0	0	0.000883917866142397	0	0	0
X1810049J17Rik	0	0	0	0	0	0	0	0	0.00230652680195677	0.00321125738388495	0	0	0
X1810053B23Rik	0	0	0	0	0.0410017548751086	0	0	0	0	0.0074000654856182	0.00281752671207243	0.0111938836619671	0.0054667392649641
X1810055G02Rik	0.222651667296757	0.226675138872108	0.131153208479559	0.0884099471709157	0	0.0977361516249429	0.580577507804811	0.167521426117016	0.401087882090017	0.0831546967255815	0.069596248159845	0.144606490827352	0.191375214686551
X1810058I24Rik	1.15167644761002	0.515986600859635	0.367743311868892	0.222820238662429	2.34487563612228	0.319932380043447	0.335307624782402	0.347724130749675	0.345866947169226	0.189572550052917	0.184916016652193	0.49731676597206	0.813881127103967
X1810059C17Rik	0	0	0	0	0	0	0	0	0	0.00269588969618832	0	0	0
X1810059H22Rik	0.0959287824718929	0.0584795321637427	0	0	0.431786272510964	0.0801868398277139	0.0847192864246144	0	0.103808124732263	0.0910476369802277	0.0754538015168277	0.0494720157933125	0.126457561080274
X1810062G17Rik	0	0	0	0	0.272940766783195	0	0.0871383757406762	0	0	0.00480588225022413	0	0	0
X1810062O18Rik	0	0	0.0148094176048433	0	0	0	0	0.0318557577417036	0.02087899526099	0.0245355127519981	0.0219668065121826	0	0.0035631721924341
X1810063I02Rik	0	0	0	0	0	0	0	0	0	0	0	0	0
X1810064F22Rik	0	0.0654621628698612	0.0253876399984824	0.130160099809736	0.113579573849439	0.0238829409800484	0	0.0748667522107171	0.0440840440705899	0.0307293858592206	0.0354213048384129	0.0218578274634754	0.0246661956032773
X1810065E05Rik	0	0	0	0	0	0	0	0	0	0.00257382825364593	0	0	0
X2010001A14Rik	0	0.0348645859481773	0.00941819123637306	0	0.218699843553365	0.0443735129753866	0.0264477498254448	0.0326442139762938	0.046771010644496	0.0867832761497726	0.0580426449510651	0.193525817963798	0.0832641238258662
X2010003K11Rik	0	0	0	0	0	0	0	0	0.00524441875844679	0.000763721053660162	0.00270438088067622	0	0.00865992808795716
X2010005H15Rik	0	0	0	0	0	0	0	0.0136039984872354	0	0.00589512338794772	0	0.00254230070586979	0
X2010007H06Rik	0	0	0.00532070835654492	0	0	0.140284405022013	0	0.0377180575200377	0	0.0118821425675452	0.0152888440886061	0	0
X2010009K17Rik	0	0	0	0	0	0	0	0	0	0.0019746367359565	0	0	0
X2010010A06Rik	0	0	0	0	0	0	0	0	0	0.00376446518845102	0	0.00753786836620472	0
X2010013B24Rik	0	0	0.0399730446379293	0.204802093388477	0	0	0	0	0	0.00222837253040614	0	0	0.0056637071908692
X2010015M23Rik	0	0.041105575560269	0.0296866340117569	0.0599118098159509	0.223803768855467	0.122285303722994	0.0534504968223679	0.11957444545449	0.252669608015415	0.196309590535589	0.181605503216398	0.17307047111878	0.176999914294622
X2010016I18Rik	0	0.0339865549188741	0	0	0	0	0	0	0.0160043019563659	0.00372561033934203	0	0	0
X2010103J01Rik	0	0	0	0	0	0	0	0	0	0.000984146823039563	0	0	0
X2010106C02Rik	0	0	0	0	0	0	0	0	0	0.000543546795030678	0.00165984139883466	0	0
X2010106E10Rik	0	0	0	0	0	0	0	0	0.0222668548958134	0.00469975270070237	0.00639539940548367	0.0219534148536805	0
X2010107E04Rik	0.862772890571207	0.967494295407087	1.51852066752516	1.38520025023207	0.825153369024207	1.13756490415253	1.11370012398466	1.14825752416565	1.75362320536905	2.88771029712839	2.08264925303423	1.38907192140352	1.02445258738181
X2010107G12Rik	0	0	0	0	0	0	0.00744772442228002	0.065961341074266	0.0238639777041687	0.0275477191964139	0.0326874825693429	0	0.00408910319424385
X2010107G23Rik	0	0	0.0587908463513218	0	0.169101731601732	0.0341022744690788	0.111558960033031	0.00505333032154846	0.165453789580966	0.531562269034626	0.778063728285484	0.111391699720362	0.052590446378416
X2010109A12Rik	0	0	0.0636724098626709	0	0	0	0	0	0	0.0118095991131827	0.0171009206797082	0.00641463563265948	0.00662987527878626
X2010109I03Rik	0.10016627601819	0.0683584968403711	0.207901248693572	0.0847996055528142	0.154751868625222	0.240363033653969	0.264931585210034	0.187827132349898	0.377071735705581	0.261458971313856	0.21151224543682	0.160061078045904	0.162231653904545
X2010110G14Rik	0	0	0	0	0	0	0	0	0	0.00102996052161321	0	0	0
X2010110K18Rik	0	0	0	0	0	0.00363812051783552	0	0.00411256078878916	0.00690284044981669	0.00852861965327792	0.00741954416515822	0	0.0121249606387171
X2010111I01Rik	0	0	0	0.208317337073277	0.131905239276104	0.175307607387857	0.211636451967103	0.0235653697465427	0.0862244840385723	0.17257698007235	0.0947619311349588	0.0441442164208105	0.127993326847327
X2010204K13Rik	0	0	0.0211551407903718	0.0204649639816634	1.14944522489791	0.0135346371484535	0	0.0897343482664938	0	0.89058036173214	0.612635708660557	0.0304192230390215	0.010578795956944
X2010300C02Rik	0	0	0.0573395973267187	0	1.84530910627698	0.0249597719607684	0	0.0293047768081859	0.202223272852389	0.164086389607282	0.507172922429443	0.0184221463518215	0.00477635208974957
X2010300F17Rik	0	0	0	0	0	0	0	0.0103621037142961	0	0.00516834405617158	0	0	0.00654849685803121
X2010308F09Rik	0	0	0	0	0	0.0240792109724149	0	0	0.00351891628638911	0.00695873943451993	0.00639988792968542	0.0058275397875279	0.0165544276472185
X2010310C07Rik	0	0	0	0	0	0	0	0	0.00629132021152677	0.00870079781613736	0.00621085757386664	0	0.00654606202001
X2010315B03Rik	0	0.0506462461002391	0.152651672533043	0.0695062277580071	0.182599773632794	0.0577455283842351	0.0558404701884167	0.0844248372553281	0.00658209551542086	0.119687204219101	0.0943695728951784	0.0251933590305595	0.127308306099639
X2010320O07Rik	0	0	0	0	0	0.0116556637201149	0	0	0.0626266535398623	0.00505232480688219	0.002124983000136	0	0
X2200002D01Rik	0	0	0	0	0	0.0652340295295953	0.0775470322750749	0	0.0165034325397962	0.0141066313633655	0.00738976686329484	0	0.00304622091925199
X2210008F06Rik	0	0	0	0	0	0	0	0	0	0.032360988137094	0.0180969258001683	0	0
X2210010C04Rik	0	0	0.0168790900144991	0	0	0	0.0992881042922247	0	0.0135970644122324	0.00595529004210883	0.00963643296423181	0	0
X2210011C24Rik	0	0.0788398781005534	0	0	0.321495464457341	0.00457352768996605	0	0.0290921188364643	0.0663636142743392	0.0166125121516896	0.00753661466009541	0.0318704376543042	0.323931330881397
X2210011K15Rik	0	0	0	0	0	0	0	0	0	0.00254160316323915	0.00114075242204554	0	0.00335185793485329
X2210013O21Rik	0.675324827754195	0.147635639331717	0.321330856570313	0.116953592814371	0.712384894919162	0.743736189233329	0.790208775632837	0.265693707397193	0.43241359851265	1.4660266261494	1.32909194928189	0.350878574789441	0.52272074567147
X2210016F16Rik	0.449264719415433	0.355558062313808	0.589468840546337	0.114549659166287	0.207854514007288	0.106322962918097	0.2908435449297	0.234269488709829	0.228601757081585	0.258219365478223	0.242766122085059	0.0433819636016261	0.180182906914411
X2210016L21Rik	0.515553567634879	0.200420145263896	0.139029228826422	0.106942619151387	0.527962842298167	0.342300943175805	0.657538280571085	0.332761847929805	0.68451387963633	1.46099615716271	1.7791175582072	0.59136848535935	0.448708254848159
X2210017I01Rik	0	0	0	0	0	0	0	0.0230148537866339	0.0129760748710791	0.000898962927698831	0.00124700469472327	0.0097642900384713	0.0107679717448421
X2210019I11Rik	0	0	0	0	0	0	0	0.00828188214053526	0.00560420001165673	0.0023871478514333	0.00686216914192077	0	0
X2210404O09Rik	0	0.090215354335938	0.0187078838764232	0	0	0.0543804226784741	0	0.0548716458134805	0.0542398260854021	0.0332426569742812	0.0507543302413524	0.0329980036025175	0.024891603657964
X2210406O10Rik	0	0	0.0289061106496123	0	0	0	0	0.012876824163103	0.105196401694932	0.0917541761808156	0.129724150324387	0.00961986661299044	0.0346185378731993
X2210407C18Rik	0	0	0	0	0	0	0	0	0.00203198218032907	0.000310969495602814	0	0.0166858968669566	0.00762643872766597
X2210408F21Rik	0	0	0	0	0	0.0190572020978168	0	0.0174805616154836	0.00997421664995985	0.0485432272595803	0.107021925833178	0	0
X2210408I21Rik	0	0.037957290456778	0.00992760788331487	0	0.436855186972888	0	0	0.0136264658670656	0.00673524493054952	0.0262236832945802	0.0545045281519381	0.0463343644953159	0.0175795337917605
X2210411M09Rik	0	0	0	0	0	0.00295911217165691	0	0	0	0.0013488782908708	0	0	0
X2210414B05Rik	0	0	0	0	0	0	0	0	0	0.000283795906471086	0.00483941841805219	0	0
X2210417A02Rik	0	0	0	0	0	0.0259782801784733	0.178504489387908	0	0.01030617587283	0.00037134721986262	0	0	0.00423415916373663
X2210418O10Rik	0	0	0	0	0	0	0	0	0	0	0	0	0
X2210420H20Rik	0	0	0	0	0	0	0	0	0	0.00548987889076333	0	0	0
X2300002M23Rik	0	0	0	0	0	0.00632232742575059	0	0	0	0.000919908766901374	0	0	0.0111217005507386
X2300003K06Rik	0	0	0.0175131655221813	0	0	0	0	0	0	0.00150320506347092	0.00182429286759866	0	0
X2300009A05Rik	0.301029255978029	0.0385748892900677	0.0518959852070849	0.0352886077124481	0.319104901558189	0.441047092671938	0.704143283448002	0.850834119145458	0.388566860113159	0.372457978692246	0.601105164216506	0.22990912031622	0.595969199727637
X2310001H17Rik	0	0.268150167872112	0.029510015039392	0.0228302162478083	0.185377428444313	0.205807784038966	0	0.0794140801761247	0.0319446932947941	0.00650982742386279	0.0169716266525596	0	0.0301777871522606
X2310001K24Rik	0	0	0.0168790900144991	0	0	0	0	0	0.00314566010576338	0.0068491789648842	0.00474142762525342	0	0
X2310002F09Rik	0	0	0	0	0	0	0	0	0.00490625616348431	0.00274017360218265	0.00094805025879876	0	0
X2310002L09Rik	0	0	0	0	0	0	0	0	0	0.00315720218342716	0	0	0
X2310003L06Rik	0.100973383416132	0	0	0	0	0	0	0	0.00821442271912178	0.00305115792386999	0.00176185623535017	0	0
X2310005A03Rik	0	0.0237721675462369	0	0	0	0	0	0	0	0.0035803142789044	0.00264384454450379	0	0
X2310005E17Rik	0	0	0	0	0	0	0	0	0.0147296230394872	0.0026562628923509	0.00250405592040143	0	0
X2310007B03Rik	0	0	0	0	0.0688496598826802	0	0	0	0	0.00161357421764681	0.00850919229641632	0.0128919141914191	0.0100691754201005
X2310008N11Rik	0	0	0	0	0	0	0	0	0	0.000236289563881533	0	0	0.00901927961209882
X2310009A05Rik	0.3045473984932	0.170239843335412	0.138380904135252	0.0821978495738445	0.13769931976536	0.145468410477926	0.36875541802867	0.0334752411710948	0.163549958670537	0.308471816546931	0.13554494303994	0.0621933847318953	0.234462846444624
X2310009B15Rik	0	0.037074935860361	0.0901347627982405	0.112248599150363	0.546637702987373	0.048247696846978	0.0636291216765285	0.154390639893507	0.320563922337431	0.647106970185373	0.42892970174294	0.0993123146812079	0.227801329502826
X2310010J17Rik	0.207975567794746	0	0.0808287507074364	0.0193714356558393	0.488296537944223	0.296143545671037	0.200695221468797	0.206511862941574	0.124652740620829	0.0921567597058024	0.132021274006593	0.305329459138589	0.0943439340923931
X2310011J03Rik	1.61635603903218	0.275180378558053	0.299850566737075	0.0790264397112573	0.271108370455903	0.122122772357229	0.153474052636371	0.454129311426521	0.173322756823534	0.267542876631584	0.257339961692574	0.538901380433437	0.227659593742212
X2310014F06Rik	0	0	0	0	0	0.0146754954447262	0	0	0.0072420425758391	0.00434943356026307	0.00835736570773635	0	0
X2310015A10Rik	0	0.0339865549188741	0.034679626215676	0.026672925913281	0.576356506375109	0.0248090960773878	0.162915536440133	0.138585483626257	0.185324044553866	0.0596313770663469	0.0676343353441917	0.398399569745486	0.0966923543240165
X2310015D24Rik	0	0	0	0	0	0	0	0	0	0.000791982678324932	0	0.0147996862466516	0.00698925200610908
X2310015K22Rik	0	0	0	0	0	0	0.0719057172235765	0.0127475088180892	0.0163357516698998	0.00856520920038553	0.0025789174529786	0	0.00629222080157859
X2310016D03Rik	0	0	0	0	0	0	0	0.0213337429411978	0.00631369332749948	0.0108090783099562	0.00224852092293689	0	0
X2310016D23Rik	0	0	0	0	0	0.00740661736822146	0	0	0	0.00218690600181469	0.0151528662485998	0	0.00631592244047243
X2310016G11Rik	0	0	0	0	0	0	0	0.0233238871590339	0	0.00129777928211203	0	0	0
X2310020H05Rik	0	0	0.0119111003117135	0	0	0	0	0	0.00784191945094017	0.000802814345971237	0	0	0.00346704092217741
X2310022A10Rik	0.422301625329988	0.438056161706351	0.806047369275404	0.17994727401671	0.602523590508381	0.48013910903221	1.30297199138334	2.43015482818722	1.24629148607885	0.838846231024156	0.811166112599143	0.651665706966004	0.802052921778906
X2310022B05Rik	0.713297233815994	0.23292436330994	0.244967137381897	0.104515078228418	0.134799956864014	0.87575909264151	1.29268863250272	11.741115605332	0.54538743027242	0.0522356535368909	0.081396654482756	1.85563817762808	0.932114448077686
X2310026I22Rik	0	0	0	0	0	0.00447220791115691	0	0	0	0.00491859389811646	0.00732372456181514	0.00746962663071286	0.0148752191835716
X2310026L22Rik	0	0	0	0	0	0.00598246420093422	0	0	0	0.0137349878190995	0	0	0
X2310030A07Rik	0	0	0	0	0	0	0	0	0	0.00149724245371088	0	0	0
X2310030G06Rik	0	0	0	0	0	0.00559092199999235	0.01489544884456	0.013262085533595	0.0046444294480978	0.0454169782340527	0.0302047698013257	0	0
X2310031A07Rik	0	0	0	0	0	0	0	0	0	0.00125679044796163	0	0	0
X2310033P09Rik	0	0.0831250661542699	0.274218206414075	0.084277238403452	0.113579573849439	0.150954365113541	0.263339308537788	0.229925789369024	0.100859907163206	0.244259474290442	0.220951305599232	0.0773865539285868	0.114435827618631
X2310034C09Rik	0	0	0.0178075044385205	0	0	0	0	0	0.0104536278277298	0.00734220570704937	0.00946206199893341	0	0
X2310034O05Rik	0	0	0	0.0483147804576376	0	0	0	0	0	0.00587879520474473	0	0	0
X2310035C23Rik	0	0.0224231334983676	0.0202168458890055	0.0515561158303146	0	0.0554906418949945	0.130473625570057	0.0217269916590079	0.0130417034551385	0.0708467963275818	0.100130731919974	0.0685978361348354	0.0965308031652765
X2310036O22Rik	0.61790889450004	1.40451626567508	1.12165182948417	1.13188295421713	0.933920211445753	0.988681011915249	1.46019724967055	0.673669160105622	1.49997972689162	1.19507816209367	0.98390675565331	0.637599172237459	1.12021409393655
X2310039H08Rik	0	0.0411248468099456	0.0812673082878066	0	0.901854576809434	0.0896638870124607	0.227750751700298	0.111974231665101	0.0986232427801803	0.0495858589502127	0.125803652812038	0.0474197995944539	0.0797715462563685
X2310039L15Rik	0	0.0984503908480517	0	0	0	0.00591519969714178	0	0	0	0.00295967705344083	0.00986212950208386	0.0147412017982133	0
X2310040G24Rik	0	0.325840113433697	0.176130063613555	0.0250561257216164	0	0.043377528811985	0.0250473394716013	0.119075050852669	0.0105150377379043	0.0495519587370139	0.0291491461356164	0	0
X2310043L19Rik	0	0	0	0	0	0	0	0	0	0.000327859554147071	0	0	0
X2310043M15Rik	0	0	0	0	0	0	0.0519005999709357	0	0	0.00177113117472782	0.00383982552269018	0	0.0149550894685841
X2310043O21Rik	0	0	0	0	0	0	0	0	0	0.00108714632362593	0	0	0
X2310044K18Rik	0	0	0	0	0	0	0	0	0	0.000578255417174705	0.00260464689843857	0	0
X2310046K23Rik	0	0	0	0	0	0	0	0.0486057442268527	0	0.00100355759741377	0	0	0
X2310047D07Rik	0	0	0	0	0	0	0	0	0	0.00551825906665802	0.00771080794508396	0.0136518305398275	0
X2310050C09Rik	0	0	0	0	0	0	0	0	0.00339250426183348	0.000540293116127076	0	0	0
X2310057J18Rik	0	0	0	0	0	0	0	0	0	0.00268573459240201	0	0	0
X2310057M21Rik	0.23857238286096	0.193187537455287	0.0589057407239225	0.0468375299760192	0.0857309420115908	0.122549614751952	0	0.0588273645602397	0.149066517793146	0.270944418767485	0.303431901217839	0.0590931518118683	0.216213098752093
X2310057N15Rik	0	0	0	0	0	0.0113249257084874	0	0.00984585332041557	0	0.00201336912667703	0.00752983008674902	0.00372077794025175	0.00732499846175032
X2310058D17Rik	0	0.0204903756705475	0.0591597611383315	0.0390234765234765	0.0410017548751086	0.057829774719007	0	0	0.0469338515233612	0.0557936375038306	0.0534035328392049	0.0433353569978023	0.0603136858977059
X2310061I04Rik	0	0.037074935860361	0.128686851347562	0	0.296179344482978	0.37623313325886	0.117379398823971	0.466838290705401	0.476835032988801	0.695903005981017	0.822033849416909	0.264235563894525	0.148344379230674
X2310061N02Rik	0	0	0	0	0	0	0	0	0	0.000723647635368845	0	0	0
X2310065F04Rik	0	0	0	0	0	0	0	0	0.00174813958614893	0.0048354074954633	0.00859354473808678	0	0.00447411278343504
X2310069B03Rik	0	0	0	0	0	0.00376678479303778	0	0	0.0144108000299745	0.00428446411098684	0.00189819307205085	0.00346855494798035	0
X2310069G16Rik	0	0	0	0	0	0.0120396054862074	0	0.0784321923475271	0.050983769856259	0.0203510831841081	0.010036542320795	0	0.0211438346600334
X2310075C17Rik	0	0	0	0	0	0	0	0	0	0	0	0	0
X2310079G19Rik	0	0	0	0	0	0	0	0.0247772525000248	0	0.000876769863102864	0	0	0
X2310081O03Rik	0	0	0	0	0.0410017548751086	0	0	0	0	0.000595065910137702	0	0	0
X2410002F23Rik	0	0.695331295956525	0.35330809555947	0.377359119746212	0.145315043013253	0.320263120239823	0.285347277645443	0.292452328354203	1.29001708731134	0.91997629245269	0.91610399799703	0.457871435388683	1.33575050628245
X2410003L11Rik	0	0	0	0	0	0	0	0	0.00784191945094017	0.000992192581210845	0.0024534121565591	0.0224512247143082	0
X2410004B18Rik	0.272028774831017	0.263923783738036	0.153829275261733	0.0234468787515006	0.207271069104174	0.446030939205517	0.259423620737095	0.324048794568647	0.39372352026518	0.505576543752274	0.555157762811317	0.53915628141122	0.798125893473433
X2410004I01Rik	0	0	0	0	0	0	0	0.0185303231241157	0	0.00218330691443782	0.0042984990856457	0	0.00711770115335229
X2410004P03Rik	0.342625785280143	0.249698045713673	0.0573994405782312	0.0645981835488672	5.58975305776482	0.277836107300041	0.214850929226824	0.212082078489068	0.268441239291318	0.313121864531059	0.308089823957343	0.0462270976856629	0.192349372239696
X2410006H16Rik	1.20249517156358	0.265161434522829	0.834053631608792	0.929370398217478	0.668413744208078	1.30258608037677	0.52193443107341	0.180094287058636	0.656365088254349	0.751530281139948	0.565648007383434	0.547913702387163	0.703804339243179
X2410012E07Rik	0	0	0.0111906016850808	0	0	0	0	0.023624409685063	0	0.00703838518223585	0.00100924223670687	0	0
X2410015M20Rik	0.681995505254038	0.318459516205305	0.437639391811051	0.61187215563414	0.520684746404431	0.552150281186681	0.388558026062093	0.466202881824253	0.446064954735742	0.750168417178567	0.631772977423351	0.300866034132759	0.375003410913306
X2410016O06Rik	0.484919018523907	0	0.15710164918714	0.108999022171492	0.179875526135914	0.00500176061973815	0	0.0272079969744707	0.0625668136632125	0.0944157460934206	0.068569145579455	0.0337092945724338	0.103784859806242
X2410017I17Rik	0	0	0.00929426766747341	0	0	0.0442391375874203	0	0.063023168658884	0.0302998484684925	0.0330354864809907	0.0346965031365197	0	0.0540924049447245
X2410018L13Rik	0.102011670135063	0	0.0246012176381675	0	0	0.070739000448733	0.122700397053029	0.0489517118812079	0.148909074451678	0.0957867916812171	0.262588234954215	0.114361350532127	0.141784575751401
X2410021H03Rik	0	0	0	0	0	0	0	0.016452293285161	0	0.0103411196700448	0.0101890533727603	0.00584301569726167	0
X2410080I02Rik	0	0	0	0	0	0.0161498708010336	0	0	0.0167937265913236	0.00118139505145096	0.00113844284698144	0	0.018845668699558
X2410089E03Rik	0	0.231351169930589	0.0720139058227893	0.247632379089944	0.278741329915675	0.0823302054573874	0	0.0680474231168653	0.0932231926097968	0.0826786496824916	0.0934540722078175	0.0494581718725607	0.0693105760358583
X2410124H12Rik	0	0	0	0	0	0	0	0	0.0185690587103504	0.00156118592261566	0.0134797602671604	0	0.00236158736456296
X2410131K14Rik	0	0.379048289159671	0.0928582073959207	0.0906876851414659	0.0730545571432746	0.0393271219611254	0.257611896517972	0.091076859541733	0.228924689657834	0.198245617685337	0.376667956333017	0.0699814331833672	0.166566727990142
X2410137M14Rik	0	0	0	0	0.18462447382025	0	0	0	0	0.00240412377911876	0.00378294180899829	0	0
X2410141K09Rik	0	0	0	0	0	0	0	0.0230148537866339	0	0.00187249191576584	0	0	0
X2410152P15Rik	0	0	0	0	0	0.0155705032386647	0	0	0	0.00458050148006016	0.00348396473333195	0	0
X2500002B13Rik	0	0.293961540886821	0.00395823116149148	0.0249202551834131	0	0	0.0609630097256448	0.0270963056896823	0.035956980592317	0.0317303420542749	0.011226752905627	0.0145450030117123	0.0371189216145053
X2500004C02Rik	0	0.194939977878131	0.0691772627422662	0.223601182910044	0.0688496598826802	0.363475607307458	0.300047758535088	0.277974194850428	0.178964365947154	0.332204713022742	0.260071233687966	0.215371433414566	0.425738638409555
X2510002D24Rik	0.302920150248395	0.12335526918016	0.180766436542067	0.0325928243637881	0.108690926481457	0.369923333895339	0.0806876895792127	0.391091620793162	0.268693075420094	0.49973288858721	0.299112822021591	0.166580401218615	0.167254017635406
X2510009E07Rik	1.06905720044294	0.0708109602116897	0.169748813879144	0.223399245171592	0	0.440381184450736	0.0616048051748036	0.646226616533622	0.692770725501525	1.32608737247887	0.511356705634535	0.667583686053325	0.396892643422932
X2510039O18Rik	1.32543375352636	0.919365072911843	1.04661352373395	0.791140266196477	0.235117195349096	0.378003162310198	0.243428590481929	0.362178636296269	0.246629701977808	0.278443084384026	0.232106197224406	0.589782825958768	0.60323068087317
X2600006K01Rik	0	0	0.0387853965225013	0	0	0.00919550376647834	0	0	0.0251878367359994	0.0214328957225578	0.0376405960230434	0	0.0186007752803137
X2610001J05Rik	0.757805581619955	1.46849567914155	1.12470292542124	1.03839593710487	0.0410017548751086	0.823938722918746	0.570419532342795	1.13502850731376	1.40327760834718	1.06992432028501	0.95741683576948	1.62728370945877	1.23421842295047
X2610002M06Rik	0.232288037166086	0.15572777737995	0.0912826404657591	0.211962742539264	0	0.128036522298292	0.106497129547836	0.0765977578456128	0.282443144467783	0.667847514101546	0.780797911662018	0.168124280646267	0.20413094956473
X2610005L07Rik	0.520955384927595	0.0348645859481773	0	0.0220505221563647	0	0.0705716961954761	0	0.0978303881708397	0.0591441556046318	0.0814260010861548	0.0671358339800088	0.0412678192550925	0.0719961639980066
X2610008E11Rik	0.102011670135063	0.061185281268738	0.0956419747889488	0	0	0.102095640831648	0.175245187737786	0.180857663175006	0.299176703372666	0.246991623298063	0.17615633491346	0.0457938207946732	0.166164153183627
X2610016A17Rik	0	0	0	0	0	0	0	0	0	0.00300425215279904	0.00208974886234072	0	0
X2610020C07Rik	0	0	0	0	0.185377428444313	0.00949213292023571	0	0.00828188214053526	0.008865232508453	0.0309931990981154	0.0468560541490236	0.00836762315572356	0.00610458869723194
X2610020F03Rik	0	0	0	0	0	0	0	0	0	0.00241132285613141	0.00159483833761707	0	0
X2610020H08Rik	0.0567298637348673	0	0.0765692475537507	0	0	0.0420952162580416	0.0577881025854397	0.0644170849367406	0.0266507645351986	0.020307145602244	0.00528019892272715	0	0
X2610021A01Rik	0	0	0.0212707023081757	0.108573876024133	0	0.0456548966279751	0	0.229300938591559	0.108668027476756	0.154347126644207	0.119491919238433	0.0354177972490262	0.112304852093319
X2610027K06Rik	0	0	0	0	0	0.018825070062834	0	0	0	0.00191464983676196	0	0	0
X2610028E06Rik	0	0	0.0134895968229302	0	0	0	0	0	0	0.0166228025689944	0.0314118397261473	0	0.00662987527878626
X2610028H24Rik	0	0	0	0	0.24486385124068	0.00582783186005744	0	0	0	0.0132951756368653	0.00700729549019175	0	0
X2610035D17Rik	0	0.0250411927620936	0.022761078076684	0.148572305888853	0.135032672240738	0.0201519939373568	0.29023677877141	0.353361943703576	0.343457568015092	0.13005703324164	0.0870472722068831	0.211082282155528	0.670161653563574
X2610035F20Rik	0.234008795772697	0	0.0166738364163257	0	0	0.0267307415812951	0	0.0435238419564738	0	0.164216773274716	0.0481883836991186	0.004229384920551	0
X2610037D02Rik	0	0.0434253951710961	0.0698564436430041	0	0	0.036622089597017	0.0671654823153285	0.0179268334220712	0.0242161711960955	0.0717003103309381	0.111607283926034	0.0817049145486919	0.0530030213178648
X2610042L04Rik	0	0.0765438902666789	0.398165326979315	0.0537310866574966	0	0.002375305939405	0	0.0421137060654884	0.142248499291396	0.201162639229592	0.116821675445475	0	0.0325233863164238
X2610044O15Rik8	0	0.0353992325446384	0.133105948037434	0.15361060152224	0.214004451292587	0.167557169037165	0.369459780894052	0.192346110675094	0.237863524428075	0.247177905574315	0.319415007786285	0.0959524559839888	0.238157016524982
X2610203C20Rik	0.291253947041656	0	0.00854656267567353	0	0	0.00607882041705571	0	0.254462568448873	0.0515040416680609	0.0200094107506363	0.19219984585759	0.007765482430596	0.00850101535733095
X2610203C22Rik	0	0.400619890424871	0.281941289800415	0.138012879380345	0	0	0	0	0.0318141599061124	0.00648719026268259	0.00178574362293095	0	0.0179558217754851
X2610204G07Rik	0	0	0	0	0	0	0	0	0	0.000806436314565067	0	0	0
X2610301B20Rik	0.799074889572738	0	0.106369085266087	0.216778450986522	4.04288961915771	0.245437482413924	0.18037123764589	0.529952997957978	0.335036489066641	1.13464162516135	0.801883682495772	0.249746420800189	0.809516884850789
X2610303G11Rik	0	0	0	0.0557239657631954	0	0	0	0	0	0.0012312489423617	0	0.00927058998034635	0
X2610305D13Rik	0	0	0	0	0	0.184463199065474	0	0.140810093387173	0.0867723352900357	0.124679796210577	0.119451711198389	0.0235878263228348	0.0211506329932944
X2610307P16Rik	0.106435063967473	0.0663534782493298	0	0	0	0.0798153237470322	0	0	0.0152716248841398	0.0446024055781621	0.0294497429156227	0	0.0298395410177824
X2610316D01Rik	0	0	0	0	0	0	0	0.0533460704838071	0.124698156836669	0.00170571039136655	0.0204739067480578	0.0279629612477072	0.0700324762993632
X2610318N02Rik	0	0	0	0	0	0.00363812051783552	0	0	0.00240483641461015	0.060243478151805	0.0190605507879905	0	0
X2610507B11Rik	0.961610708857789	1.57368182421343	0.937124704646252	0.966244804122804	0.523463258330396	0.646577194044733	0.923542038170345	1.09871500914807	1.62042334401753	1.198838765408	1.36423670387687	0.956071922185983	0.959906319035255
X2610507I01Rik	0	0	0	0	0	0.0138909889925537	0	0	0	0.0171265907093993	0.00136417682569149	0.0142255604870832	0.00371622877104314
X2610524H06Rik	0.243220878723712	0	0.0106682028878825	0	0	0.057405263762	0.177416289951719	0.248076416037502	0.330893062687167	0.142621500522057	0.244841468723142	0.137526358115295	0.104586836288134
X2610528A11Rik	0	0	0.281496371696994	0.245292800905512	0	0.0315565456395485	0.0523519095359003	0	0.0124446866787845	0.00719263520388361	0.00991367486621506	0.019353626696108	0
X2610528J11Rik	0	0	0	0	0	0	0	0	0	0.0037276856890731	0	0	0
X2700012I20Rik	0	0	0	0	0.089937763067957	0.012589638224156	0.0404305040066629	0	0.00786507928393172	0.00634922307571073	0.00203733041261645	0	0.00835536348253771
X2700016F22Rik	0	0.0817514429129674	0.0612119994161245	0.143086080586081	0	0.0886884116066091	0	0.0373064961738793	0.0670183047846075	0.0692477988427398	0.0898390942695422	0.0131662102380451	0.0951539448681912
X2700029M09Rik	0.370214398902519	0.339483115838372	0.618184776817358	0.373434294508492	0.280084030006536	0.371057234829642	0.0445960710861373	0.407534326682807	1.05575038692164	0.786954508552785	0.716470755854761	0.388429400928655	0.326917836755441
X2700033N17Rik	0	0	0	0	0	0	0	0	0	0.000635578383338074	0	0.00753786836620472	0
X2700038G22Rik	0.0814000814000814	0.0204903756705475	0.00925115198574745	0.226933713821866	0.169101731601732	0.122121256753569	0	0.0972317070342796	0.0848264340013189	0.0878376819273764	0.0490771160918495	0.0186769563375477	0.0745612389208063
X2700046A07Rik	0.398576460403348	0	0	0	0	0.177127454009417	0.485280339685649	0.0682942763596358	0	0.007766168582893	0.0046704319937604	0.165967858113138	0.01238000147898
X2700046G09Rik	0	0.037957290456778	0.0108016790129858	0	0.666791889106646	0.0067031317031317	0.0506695987474475	0.042298068734319	0.0368331725253653	0.0508373545225046	0.0452554845807248	0.06906335185835	0.0251053200426049
X2700049A03Rik	0	0.0362177119098324	0.0584840766586495	0.134331988064595	0	0.134159310057153	0.0888146043999431	0.0788050068264895	0.098933086161641	0.0752611905193854	0.111752501718389	0.0602099689782308	0.0356219132659891
X2700060E02Rik	1.46285652525584	1.16260314698331	1.184006098305	0.921196755101431	1.31113046071307	1.7133118356213	0.723637164315955	0.578533997080099	1.13716872743054	1.59429174547061	1.34857550650771	0.947285360304843	1.0975880414377
X2700062C07Rik	0	0.054551802391551	0.0826394794492749	0.0909487776484284	0	0.0300718546686289	0.130266174507316	0.0263604635223906	0.0625841276439572	0.109422304866688	0.103780878305576	0.0595730777823697	0.0677239281686076
X2700068H02Rik	0	0	0	0	0	0	0	0	0.0205804933967487	0.00384926405321752	0.0101902332376686	0	0
X2700069I18Rik	0	0	0	0	0	0	0	0.0288311847694445	0.0460166569081323	0.00326341104525177	0.030734282680389	0	0.00600669867035718
X2700081O15Rik	0	0	0.0536834002715619	0.0204301778242678	0	0.039913717092888	0.0299661382637619	0.0295728497580941	0.056785995479763	0.0488924057417239	0.0249419690883951	0	0.136509420458363
X2700089I24Rik	0	0	0	0	0	0	0.0770060064685045	0	0.00527767706210718	0.00355156960488409	0.00660935038016983	0	0
X2700094K13Rik	0.242459509261953	0.220256002440019	0.35637129240163	0.344244854281242	0.39241653318441	0.338972486195162	0.554910446456418	0.3305524196406	0.954504501259208	0.853027747712776	0.769990285279345	0.459383060040583	0.322575864697905
X2700097O09Rik	0	0.159254715116522	0.129934379311229	0.182406195955299	0.556014311402282	0.220144103707471	0.204168927191641	0.19344361622652	0.471616679258804	0.436468365901167	0.495829219281928	0.174423770983187	0.497318919800323
X2700099C18Rik	0	0	0	0	0	0.0204121098969959	0	0	0.0460066678134013	0.00507428737761566	0.0105750232515506	0.0061098365313236	0.0116055595272359
X2810001G20Rik	0.214114422747516	0	0.0243798693411097	0.0173418423973363	0.0410017548751086	0.304795685686329	0.259336573011421	0.23522506123842	0.355747811619429	0.277776705709694	0.237279741866954	0.0303233900493171	0.159914832042183
X2810002D19Rik	0	0	0.0609005207040156	0.10911312849162	0	0.0356319200274028	0	0.0247401051949273	0.106925580057393	0.103999269117387	0.070796808348314	0.124534552481816	0.0307642158259872
X2810004N23Rik	0.23857238286096	0.195173931029382	0.0351732894170759	0	0.582493201641436	0.0906309163358517	0.0806640262642069	0.225800063974049	0.220974864983957	0.0983933646435358	0.204773912964699	0.211133233663552	0.095949603352296
X2810006K23Rik	0	0	0.180647168005718	0.182235510823987	0.113579573849439	0.106283134673413	0.0488746609320398	0.123638881296286	0.0712683635091551	0.131510590678212	0.102010675667891	0.0620315077569171	0.248375734751473
X2810021J22Rik	0	0.13956928917361	0.0783502894697835	0	0.0730545571432746	0	0.022757788853235	0.067122181726907	0.0420184277674686	0.0678897520198199	0.0422574773518442	0	0.0375262428724928
X2810025M15Rik	0.0982646463455378	1.11859980582424	0.338609873831875	0.195635346507784	0	0.583562231188281	0.294211987015005	0.0494751993564099	0.214650900646283	0.299631232192013	0.235406562512769	0.303410980640728	0.0925141305643635
X2810029C07Rik	0	0	0	0	0.178742801707065	0.0346034637542271	0	0.0957916831502919	0.0268564629898781	0.116229346126551	0.0992140317836481	0.0100568716089486	0.0046251500861203
X2810030D12Rik	0	0	0	0	0	0	0	0	0.00672504001398808	0.00530230423544301	0.0132170202684399	0	0
X2810032G03Rik	0	0	0.00352274796887159	0	0	0	0	0	0.0116090490215313	0.0811253115386358	0.0926330538061237	0.00833767587285044	0.00636156596307747
X2810039B14Rik	0	0.0217019540439421	0.0406837869884161	0	0	0.0114059208859956	0	0.150108444072609	0.139625546722643	0.0566551120362953	0.0775054795138428	0.0585149143457541	0.0475064647360584
X2810049E08Rik	0	0	0	0	0	0.0160602322951999	0	0.0500000748392586	0.0284128154996499	0.0180977958538987	0.0286031805828194	0.0182759392690538	0
X2810403A07Rik	0.958920666356324	1.18378051892333	0.511252765770793	0.979223304364847	0.859613553575186	1.51667985751572	1.57596840536297	1.09164705043413	1.22936700692685	0.89702594626979	0.763124710447056	0.288496964249786	0.864079202490276
X2810403D21Rik	0.892799142680435	0.366046599084174	0.226566596174532	0.423335896556318	0.985108277087697	0.283558469455791	0.577915494665244	0.72818759989338	0.621784363950923	0.789340556953355	0.94396472902426	0.361171683500501	0.798433908846203
X2810404F17Rik	0	0	0.0112229288926448	0	0	0.0107832988267771	0.0445061596524959	0	0.00855915986053789	0.00275108253446288	0.00135872518967804	0	0
X2810404M03Rik	0	0	0	0	0	0	0	0	0.0044003896985117	0.00275317503514057	0.00151894888736994	0	0
X2810407A14Rik	0	0	0	0	0	0.00672390050778897	0.100646148271906	0.0390109932979113	0.0232770465710394	0.0104737256963683	0.00610038142443022	0.0102654122332918	0.0099003547928845
X2810408A11Rik	0	0	0	0	0	0	0.0616048051748036	0.00828188214053526	0.0509243272816933	0.00335495357890429	0.00402242692904161	0.0193946916728891	0
X2810408I11Rik	0	0	0	0	0	0.0885646418802175	0.0820634021845278	0	0.0174287686226393	0.0131696036642814	0.0098029348922666	0	0.0143634727549979
X2810410L24Rik	0	0	0.0153959266031123	0	0	0.0355895498967788	0	0.0374100908002861	0.0504362829776394	0.0439585458520091	0.0525921682121579	0.166302482122996	0.292932087627505
X2810414N06Rik	0.265731292517007	0	0.0258275288265774	0	0	0	0.0632523071279025	0.17437625522709	0.0412628997629137	0.0439944624618129	0.0501216189844896	0.033009417977693	0.0845382622902964
X2810417H13Rik	0.202985053551195	0	0.0559166495874062	0.105731783669991	0.200754899158784	0.258150175343357	0.213470482661849	0.113804027403223	0.447230016307688	0.134585787008155	0.151822722407252	0.24166967645898	0.499610233320713
X2810428I15Rik	0.216382459686077	0.463365115064092	0.358516014489815	0.150793786665822	0	0.270595198283973	0.713976111885294	0.252071065060116	0.60541113587959	0.409594265464352	0.421296821017587	0.491825653978298	0.307666627238912
X2810429I04Rik	0	0	0.0235485024421084	0.108675490383677	0.263810478552208	0.0277809480155212	0.067645725804815	0.0459016694437177	0.0928272955224155	0.0663069220012843	0.0958298141972942	0.117304871079074	0.148343467082311
X2810430I11Rik	0	0	0	0	0	0	0	0	0	0.00373310207644419	0.00298812440580427	0	0
X2810433D01Rik	0	0	0	0	0	0.00369071239606954	0	0	0.0534746316699793	0.0347466537512731	0.0404772565523015	0.0327282461296805	0.0871813798064828
X2810442N19Rik	0	0	0.0237131468057206	0	0	0.00967192819560508	0	0	0	0.00325961756816756	0.00238497276361104	0	0
X2810455O05Rik	0	0	0.0194088453871968	0	0.111901884427734	0.0299846478602955	0	0	0.00317339829068075	0.0447115125645624	0.0534624666438228	0	0.0287563699647206
X2810459M11Rik	0	0	0	0.124024720430722	0.234704004720903	0	0	0.561530954365532	0.146937611877724	0.00779097757372457	0.0111086900558199	0.0201752218013447	0
X2810468N07Rik	0.0532175319837367	0.0628075296042111	0.0659338113824838	0	0	0.0297020377974092	0.0551468095804592	0.266226330191225	2.0822058581525	0.0198725540846949	0.0878360111084547	5.59152474987699	5.01994977735087
X2810471M01Rik	0	0	0	0	0	0	0	0.0136039984872354	0	0.00150031340234009	0	0	0
X2810474O19Rik	0.120737950352555	0.852101271182977	0.645476238141062	0.404306049768903	0.176034427115847	0.334584783484062	0.606918620243398	0.477317981658058	0.442320287111546	0.265944823469195	0.35583613371743	0.0999105853486773	0.194508381965337
X2900005J15Rik	0	0	0	0	0	0	0.0523519095359003	0	0	0.00844867775824836	0.00833623549426079	0	0
X2900009J06Rik	0	0	0	0	0.0940309173656298	0	0	0	0.00806027798286707	0.0131388721877447	0.00753730435879987	0	0
X2900011O08Rik	0	0.0462410639143985	0.028386156604252	0	0	0.0268605919950931	0	0.0994695138225027	1.68626309294362	1.25001251768001	2.59010944284612	0.137828798072938	1.32126733942695
X2900026A02Rik	0	0.122942254023285	0.0466998100846284	0	0.447521361631099	0.582790200443536	0.198517045538974	0.0490642501330197	0.0269984723486497	0.0176828031815438	0.127159619623726	0	0.00619514943376643
X2900041M22Rik	0	0	0	0	0	0.0278669520242554	0	0	0.00578435240125821	0.00372453574449563	0.0522246149576943	0.011526181721781	0.0206899191685414
X2900052L18Rik	0	0.0318054018294467	0.00352274796887159	0	0.396636522290972	0	0	0.163613551356644	0.0532954518123168	0.03298178958451	0.0170932268207157	0.171172109092001	0.0793860439195857
X2900052N01Rik	0	0.145084786512918	0.0166329972995934	0	0	0	0	0.241805043401551	0	0.0455935176528061	0.0110483681975598	0	0
X2900055J20Rik	0	0	0	0	0	0	0	0	0.0286308858404517	0.00686551534524268	0.0694611078701859	0	0
X2900072N19Rik	0	0	0.0183543490630105	0	0	0	0	0	0	0.00932036270457762	0.00493748160788101	0	0
X2900076A07Rik	0	0	0.0399700214564007	0	0.113750113750114	0.121800286537703	0.13695124465041	0.0995586930539401	0.118655579365875	0.182454101567548	0.136219512829683	0.0799996699079586	0.202664028208123
X2900079G21Rik	0	0	0.00778297940234501	0	0	0.0119921389333548	0	0	0.116802670402302	0.0158654213543505	0.0338978228514983	0.00537367169552776	0.00705353918382087
X2900089D17Rik	0.0567298637348673	0.117271789098415	0.0207016192806601	0	0	0.0294481130786357	0	0.0463672411872298	0.0308741600870028	0.0432858401665383	0.0203723271660493	0	0.0307295710522737
X2900092C05Rik	0	0	0	0	0	0	0	0	0	0.000962281040676041	0.00845602000090457	0	0
X3000002C10Rik	0	0.0237721675462369	0.118897684971525	0.15409411745208	0	0.133981801569828	0.109169678207742	0.214698861918384	0.151552232364854	0.362539570719531	0.322195369002376	0.145396824152369	0.0586293821415875
X3010001F23Rik	0	0	0.0248012907142681	0.0325928243637881	0	0.00939288506203092	0.0737474004041357	0.0542333760516656	0.0536839164571534	0.0543428131929093	0.0575895346651918	0.0061098365313236	0.0787405163554613
X3010003L21Rik	0	0	0.0532677569012608	0.0537310866574966	0	0.0294882134473036	0	0	0	0.00991388273886227	0.00386513758445821	0.0209323257907186	0
X3010026O09Rik	0.485987706624013	0	0.0514730111035218	0	0.131068470168816	0.0335108684663459	0.166186111826635	0.0231439693758997	0.0441959820934785	0.114463277061377	0.107940614585012	0.0061098365313236	0.0117072802278872
X3100002H09Rik	0	0	0	0	0	0.0138398861873176	0.0614333632309034	0	0.147934989829382	0.0153210230861622	0.0094611654799535	0	0.0228793161829979
X3100003L05Rik	0	0	0	0	0	0	0	0	0	0.00121030334694088	0.00528623727843166	0	0
X3110001I22Rik	0	0.0868507903421921	0.012372623837592	0.143815913450925	0	0.0992340625848067	0.0303645876033535	0	0.0102288047469513	0.0228057761166773	0.0212393395097147	0	0.0112712124217778
X3110002H16Rik	0	0.0909951226614253	0.131083534482306	0.155295148289787	0	0.19817085517712	0.0628190336057144	0.083408794370843	0.050971588992788	0.216242906357243	0.117848577346169	0.139106829330519	0.125056131872689
X3110004A20Rik	0	0	0	0	0	0	0	0	0	0.000502058313571063	0	0	0
X3110009E18Rik	0.156641604010025	0.0652188091045458	0.0302334932685127	0	0.183063010288141	0.0520082119660038	0	0	0.0418380082054607	0.031205825954052	0.0124676895397327	0.0212311000385563	0.173086094242655
X3110018I06Rik	0	0	0	0	0	0	0	0	0	0.00641795378857472	0.00164619784269065	0	0
X3110035E14Rik	0	0.215914149862102	0.0134584430196439	0.0625869715058588	0.0730545571432746	0.0343079891874231	0.044384854911468	0.121388137768473	8.50340407983207	0.0192113289790365	0.148172718515538	0.0305372019806881	3.76001572312347
X3110039M20Rik	0	0	0	0.020967525496511	0	0	0	0	0.00936496172004571	0.000321631107131462	0	0	0.00827721382360926
X3110040N11Rik	0	0.308933245710481	0.0378157499912692	0	0.111901884427734	0.0208553630983273	0.284493572157033	0.0168814835447739	0.0386192166870431	0.0851553463592268	0.0670835802581171	0.0514709405670217	0.0503093041626316
X3110043O21Rik	0.102011670135063	0.0533440454254592	0.208210796773058	1.08493159667094	0.0688496598826802	0.207750904623567	0.559539704254192	0.113435578999199	0.144176591751744	0.3541153119355	0.338342925234441	0.122452077234095	0.366457116572395
X3110045C21Rik	0	0	0	0	0	0.0647891710831706	0.0725795659954013	0.0326442139762938	0.0245667080590293	0.0334572779211256	0.00789777052305214	0.0303944438956559	0.144128007845828
X3110052M02Rik	0	0	0.0131102493307218	0	0	0.002375305939405	0	0	0.0282022694804768	0.0376665138555695	0.0178219180486028	0.0945087107400606	0.0423273915266518
X3110053B16Rik	0	0	0.00322585431912861	0	0	0	0	0	0.0441534215786494	0.025911421139042	0.0298232525192483	0	0.00833994969342345
X3110056K07Rik	0	0	0.0306341398195407	0	0	0.032384335493589	0.0683438241103343	0.043442044605198	0.00801660399018447	0.0221123286779501	0.0118364321754588	0.062058875622732	0.00702904065269046
X3110062M04Rik	0.0982646463455378	0.41607259096056	0.103696980925556	0.088677639046538	0.146769601080224	0.0434612144816379	0.157801376566348	0.143528981316626	0.116580083586655	0.133806716832226	0.0952613610565948	0.128802021172956	0.151494067524401
X3110070M22Rik	0	0	0.00263658220902876	0.0173418423973363	0	0	0	0	0.0123750736316881	0.00605374922438187	0	0	0
X3110079O15Rik	0	0	0	0	0	0	0	0	0.0338141593259744	0.00101826635855016	0	0	0.00593581719582498
X3110082I17Rik	0	0.183896205983002	0.0947115298511784	0.0234468787515006	0	0.0719646696106697	0.0299661382637619	0.0762818125956199	0.129913217952357	0.05050317766384	0.0653332936636757	0.0454225283564386	0.0820629660000459
X3110082J24Rik	0	0	0	0	0	0.00672390050778897	0	0.163582674841872	0.029233968102705	0.00287135973497329	0	0.0123036460694325	0.0699314719637138
X3110083C13Rik	0	0	0	0	0	0	0	0	0	0.0158089730845614	0.0135227835889709	0.0347403161368769	0
X3110099E03Rik	0	0	0	0	0	0	0	0	0.00430228731104892	0.00468033420416742	0.0161565613357677	0	0.00452180141333425
X3300002A11Rik	0	0	0	0	2.80005795177735	0	0	0	0.00322880194658012	0.00563255557790836	0.00627500559732556	0.0130019567944976	0.00423415916373663
X3300002I08Rik	0	0	0.0131102493307218	0	0	0	0	0.131487252310888	0.010627672494635	0.0114862114974206	0.0072921791799891	0.0275497263107414	0
X3300002P13Rik	0	0	0	0	0	0	0	0.0103621037142961	0	0.00165118988044085	0.0127640250997233	0	0
X3300005D01Rik	0	0	0.0114433104123826	0.0249202551834131	0	0	0	0	0	0.00334841377390251	0	0	0.00859860014789592
X3425401B19Rik	0	0	0	0	0.0733848005401121	0	0	0	0.00921493372158921	0.00410958377649003	0.00517541834114068	0.00964069143038939	0
X3632451O06Rik	1.04797489331616	0.0604127398385772	0.133921678793547	0	0.227635159037546	0.0559135663123502	0.0506695987474475	0.242687325542002	2.87513749810485	2.33661781713934	0.971191946066477	0.0867254324706331	1.00359290166713
X3632454L22Rik	0	0.0763017012023348	0.0235720126253915	0.103614058355438	0	0.00742093353158333	0	0.0258444011981464	0	0.0437784795035889	0.0300018385932987	0	0.0317791223877561
X3830403N18Rik	0	0	0.0491181738479972	0.236654818554923	0	0.0127517870452877	0	0	0	0	0.00356695445520506	0	0
X3830406C13Rik	0.0959287824718929	0.331476279580809	0.255834481796918	0.378329297820823	0.472752296599441	0.195256669239795	0.428773139081022	0.512218302474829	0.297292772386877	0.21776877193329	0.377076613046946	0.293794156555086	0.241744631022339
X3830408C21Rik	0	0	0	0	0	0.0362526281258251	0	0.0666984578582893	0.0225233016775213	0.047077918257532	0.0422031699674909	0.0413978680097975	0.00583547689851405
X3830417A13Rik	0	0	0	0.0351527371742448	0	0	0	0	0.00521974881524751	0.00196787588999898	0.00269242781601025	0	0
X3830432H09Rik	0	0	0	0	0.0410017548751086	0	0	0	0.0243733492094579	0.00598273709413114	0.00847044872202105	0	0
X3930402G23Rik	0	0	0	0	0	0.00901875901875902	0	0	0.0135114908618551	0.00417143604280286	0.00808305691820582	0	0.00655947608152641
X4430402I18Rik	0	0	0	0	1.99604547860059	0.0105860433604336	0	0.0352599362500353	0.0489206228169594	0.0293337506008126	0.0133910927407297	0	0.0245033177492232
X4631405J19Rik	0	0	0	0	0	0	0	0.00714048038295824	0.00593121569162423	0.00687359541454891	0.00207462509449917	0	0
X4631405K08Rik	0	0	0	0	0	0	0	0	0.0141957134623629	0.0025928731475593	0	0	0.0154910988146211
X4632404H12Rik	0.0959287824718929	0.0496149876954831	0.037080955615674	0.224898456806352	0	0.0759867729057664	0.0977493218640795	0.18176052094071	0.053636394175377	0.0994938770618507	0.10611588817256	0.0249541811164242	0.0162293639970959
X4632411P08Rik	0	0	0	0.0185437930215998	0	0.0183741645845997	0	0	0.00573700095980026	0.0269419475351995	0.0190712354850837	0.007765482430596	0.0187491165136402
X4632427E13Rik	0.0982646463455378	0	0.422596880217456	0.100298222331149	0.373894722584329	0.198574450640401	0.27274201110594	0.487282472591463	0.49510697419557	0.474666325846501	0.412325555206366	0.175530329385662	0.266722502347324
X4632428C04Rik	0	0	0.0111852319145985	0	0	0	0	0	0.0078697276759435	0.0388666888875988	0.0550356214063164	0.0140104414834287	0.0107617994620771
X4731419I09Rik	0.341600054656009	0	0	0	0	0.00322337748071131	0	0.0187093539285901	0	0.00889949936851117	0.00573040951196759	0	0
X4732414G09Rik	0	0	0.00527316441805753	0	0.0962612144314813	0.00598246420093422	0	0	0	0.0229386044660482	0.0279784249036164	0	0
X4732419C18Rik	0.335016345398939	0.116513169678027	0.0870562822366774	0.139649574960604	0.158931977113795	0.219779212045635	0.170465547661699	0.240632252387371	0.308014269063568	0.255978294189233	0.258561912057172	0.171849196747281	0.318941782137843
X4732463B04Rik	0	0	0	0	0.172906994151213	0.0113856572525931	0.0264477498254448	0.00411256078878916	0.0158206918270833	0.0165973381233177	0.0543535195010447	0.0277417152418922	0
X4732465J04Rik	0	0	0	0	0	0.00742067388799875	0	0	0.00536269803773516	0.0100363866767331	0.0363544792290161	0	0
X4732471J01Rik	0	0.0390731840737702	0.00768800241095756	0.015628125625125	0	0	0	0.0117911040836131	0.0148699254896191	0.0198664180262806	0.0278136666837472	0.0241224815056168	0
X4732487G21Rik	0	0.0765438902666789	0	0	0	0	0	0	0.0297886557193975	0.000877678611865764	0.00358808965852258	0.0132454717043611	0.00694091614540387
X4732490B19Rik	0	0	0.0213266452973681	0	0	0.00541688334200035	0	0	0.00929184683902493	0.00357851405204578	0.00178574362293095	0.0183450944489274	0.0108594065741157
X4732491K20Rik	0	0	0.0106002834515795	0	0	0.0432164829821407	0	0.0479350767320741	0.00643886809849923	0.0405031072799629	0.0729953735850853	0	0
X4831440E17Rik	0	0	0	0	0	0.0122347506068436	0	0.0220315756542276	0	0.00542727858516108	0.00113844284698144	0	0.0119818157365618
X4833407H14Rik	0	0	0	0	0	0	0	0	0	0.00583636711524049	0.00393387867494839	0	0.00349526182307264
X4833412C05Rik	0	0	0.0131695046949284	0.0557239657631954	0	0	0	0.0227139024983021	0.00511350968805546	0.00789715331141209	0.00525928502942745	0	0.00923211001720865
X4833413E03Rik	0	0	0	0	0	0	0	0.0486057442268527	0	0.00495775948655513	0.00114692735866758	0	0.00609718919578074
X4833417C18Rik	0	0	0.0226530838775737	0	0	0	0	0.0707319532607465	0.00759588090570246	0.00524866594333072	0.0118975502058143	0	0
X4833418N02Rik	0	0.054551802391551	0.0133352536098532	0	0	0.036420272885185	0	0.00502256891341242	0.0109144092030298	0.0174672295550227	0.0447834870401606	0	0.00356605910529003
X4833420G17Rik	0.623246800470548	0.440078862327336	0.358964844404614	0.293132842250447	1.08333343168914	0.456330656855939	0.823508888438632	0.969318809224895	0.928212700797024	0.451262969610445	0.39669784132242	0.188270896692178	0.580878341098842
X4833422C13Rik	0	0.0235046351140445	0	0	0	0.0348870825902163	0.489054503105713	0.0154005134531185	0.0628066259952009	0.010899674206585	0.0679984032232793	0	0
X4833422M21Rik	0.10016627601819	0	0.051928918516876	0	0	0.0188707729468599	0	0.0218420253673283	0.00957955340122043	0.0230937411383768	0.0118832861911276	0	0.0151903656624822
X4833423E24Rik	0	0	0.118397864007849	0	0.187209824771604	0.0228967756533156	0.0473375021893595	0.0263499403832599	0	0.247127761193262	1.09347440654458	0.0090358111786538	0.0337596046075108
X4833427F10Rik	0	0	0	0	0	0	0	0	0	0.0106735524251635	0.00441931913903188	0	0.0134857401783354
X4833427G06Rik	0	0	0.0142656201407731	0	0.904712894257103	0	0	0	0	0.000734141492958594	0	0	0
X4833428L15Rik	0	0	0	0	0	0.00711520947176685	0	0	0.0322572646073004	0.000695993755544025	0	0	0
X4833439L19Rik	0.126781276941021	0.407314248432811	0.920033768721562	0.251401722774941	2.39425484124161	0.901734637062477	0.876964009671355	1.21980659795849	1.14664068018116	0.877656686769663	0.672182304866862	1.05754553397818	1.6859662139725
X4921501E09Rik	0	0.0908760005604752	0.0890517428073439	0	0	0.00368757670159539	0.0304064121041845	0	0.00697150744905571	0.00175770771558718	0.00503231941797392	0	0.0117991112451854
X4921504A21Rik	0	0	0	0	0	0	0	0.0314317146000314	0.04653136503846	0.026131475088504	0.0453673013181723	0	0.0115826538176427
X4921504E06Rik	0	0	0	0	0	0	0	0	0.00736481151974359	0.00416136758703066	0.00458533507850329	0.014045917728538	0
X4921507G05Rik	0	0	0	0	0	0	0	0	0.0110944596966797	0.0101578527073707	0.0115162797094667	0	0
X4921507P07Rik	0	0	0	0	0	0.0329123106310276	0.0144187166477061	0.00822512157757832	0	0.0445805336317014	0.0148922982670051	0	0.00419831496430593
X4921508D12Rik	0	0	0	0	0	0	0	0	0	0.00214263034685436	0	0	0
X4921508M14Rik	0	0	0	0	0	0	0	0	0	0.00192973701147954	0	0	0
X4921509C19Rik	0	0	0	0.0193714356558393	0	0	0	0	0	0.00417696699894877	0.00422222041983121	0	0
X4921511C10Rik	0	0	0	0	0	0	0	0	0	0.000845338351617405	0	0	0
X4921511C20Rik	0	0	0	0	0	0	0	0	0	0.000721007463854371	0	0	0
X4921511H03Rik	0.0532175319837367	0	0.0222414748997817	0	0	0	0	0	0	0.00735553101758516	0.00114075242204554	0	0
X4921511M17Rik	0	0	0	0	0	0	0	0	0	0	0	0	0
X4921513D11Rik	0	0.0423151462834607	0	0	0	0	0	0	0	0.00218393746526332	0	0	0
X4921513I03Rik	0	0	0	0	0	0	0	0	0	0.00193804254097931	0	0	0
X4921513I08Rik	0	0	0	0	0	0	0	0	0	0.00410884054106764	0.00338501575386332	0.015104485276903	0.00415178252630984
X4921514A10Rik	0	0	0	0.0399004085801839	0	0	0.0150477540474696	0	0.0174059859185574	0.0121800219729927	0.00589550181629354	0	0
X4921517D22Rik	0	0	0	0.144944341372913	0	0.0091906358449503	0.026725248411184	0	0.0240607869892295	0.00825378025936319	0.00919605147249915	0.0310913295576272	0.00773703968482395
X4921518K17Rik	0	0.102058057994411	0	0	0	0.00581806672624367	0.0528532845673694	0	0	0.0292503346592235	0.0123838254293171	0.00980296049406921	0
X4921521D15Rik	0	0	0	0	0	0.0130338672005339	0	0	0.00663456862366537	0.00269846205411735	0.00607585715512899	0.0272754548182091	0
X4921522P10Rik	0	0	0	0	0	0	0	0	0	0.00694923243854514	0.0061058958139657	0	0.00641254190596135
X4921523L03Rik	0	0.154482141966997	0.139660701255664	0.118134763731716	0.089937763067957	0.047665689253449	0.236115886463031	0.193098506674758	0.216843921224449	0.162392035379009	0.172433822726215	0.0465432088467252	0.0853119639187524
X4921524J17Rik	0.0959287824718929	0.331507580196011	0.174374888366525	0.330583556693558	0	0.992093297408993	0.542388892885477	0.213069526272502	0.175744743807224	0.508334942422397	0.486436885153444	0.174716093512917	0.418995278162362
X4921524L21Rik	0	0	0.00395823116149148	0	0	0.00632463064157053	0	0	0	0.00538951631466422	0	0	0
X4921528I07Rik	0	0	0	0	0	0	0	0	0	0.00136408292216426	0.00187747310144288	0	0
X4921529L05Rik	0	0	0.0151560619701062	0	0	0	0	0	0.00997421664995985	0.00774531464345123	0.0130581975139174	0	0
X4921530L21Rik	0	0	0	0	0	0.00150573383444155	0	0.0199656989292396	0	0.00418251260631445	0	0.00380807311500381	0.027506495333308
X4921531C22Rik	0.408046680540254	0.0954162054883401	0.0356731692790137	0.452154502262475	0.27088738669274	0.26270691389571	0.122053191927571	0.180880271840644	0.515062929105793	0.0528754474317609	0.0931834076361728	0.0952456943545044	0.177662959262384
X4921534H16Rik	0	0	0	0.0102324819908317	0	0.00493073306194579	0	0	0	0.0107500971333304	0.00364793702973743	0.0106290822318947	0.0154910988146211
X4921536K21Rik	0	0.0217019540439421	0.0129428224930724	0	0.137741046831956	0.0267505564115734	0	0	0	0.0108182531864119	0.0105595021635497	0	0.020068002203944
X4921539E11Rik	0.0959287824718929	0	0	0	0	0.00155384508288831	0	0	0	0.00549194128698049	0.00294934094027349	0	0.00322093556582819
X4921539H07Rik	0	0	0.0317143174286031	0	0	0.0110953575589034	0	0.0080949964017741	0	0.00403199526065348	0.00315491649567019	0	0
X4922502D21Rik	0	0	0	0	0	0	0	0.0337457058589294	0	0.00214040845818338	0.0119746340129947	0	0
X4922502N22Rik	0	0	0	0	0	0	0	0	0	0.00359456094000383	0	0	0
X4930401G09Rik	0	0	0	0	0	0	0	0	0	0.00216349038571429	0	0.00605750388437437	0
X4930401O10Rik	0	0	0	0	0	0	0	0	0	0.00174300812555039	0.00357853672095882	0.0300941948298173	0
X4930402C01Rik	0	0	0	0	0	0	0	0	0	0.000655741259018889	0.00327762454140752	0	0
X4930402F06Rik	0	0	0	0	0	0	0	0	0	0.00215024051351562	0.000936571623378326	0	0
X4930402H24Rik	0.961523622776001	0.586841454634419	0.328599132719806	0.342127082571988	3.00767293668136	0.717112013464538	1.35549222103382	3.91733752286314	1.27463370892333	1.39645147781653	1.38805296127222	7.37787824990889	8.67465051393841
X4930402K13Rik	0	0	0	0	0	0	0	0	0.0183916840161553	0.00204714467539749	0	0	0
X4930403D09Rik	0	0	0	0	0	0	0	0	0	0	0.00207462509449917	0	0
X4930403O15Rik	0	0	0	0.045421511627907	0	0.0487727663336811	0.0823696089090969	0	0.0280509909067574	0.0152495628444623	0.0253608774156847	0.0300938435343473	0.0239053516836249
X4930404A12Rik	0	0	0	0	0	0	0	0	0	0.000942846418937305	0	0	0
X4930404H24Rik	0	0	0	0	0	0	0	0.025763700491829	0.00984152197168988	0.000371299030501101	0	0	0
X4930404I05Rik	0	0	0	0.103614058355438	0	0	0.013529145160963	0.0314317146000314	0.0174673437691079	0.0149413737719163	0.0239490555966445	0.0478583729424216	0.0290091377048883
X4930404N11Rik	0	0	0	0	0	0.0137404844412852	0	0.00445088338908065	0.0087029929592787	0.0223497985487666	0.00938790367078301	0	0.0144679990673243
X4930405A21Rik	0	0.0430207446030476	0	0	0	0.00150573383444155	0.0528532845673694	0	0	0.00890166359910124	0.00732771351184252	0	0
X4930405D11Rik	0	0	0	0	0	0.00838296045925211	0.0726950225718045	0	0	0.00427254789024075	0.00411844548786085	0.00802674511472225	0
X4930405H06Rik	0	0	0	0	0	0	0	0	0	0.00325195677439583	0.00806087042787077	0	0.0140228066928052
X4930405L22Rik	0	0	0	0	0	0	0	0	0	0.000177859782995057	0	0	0
X4930405O22Rik	0	0	0	0	0	0	0	0	0	0.0018711605527958	0.00234970797829246	0	0.00415178252630984
X4930406D18Rik	0	0	0	0.0286907822254866	0	0	0	0	0	0.00059946162351592	0.00302877212366598	0	0
X4930407G08Rik	0	0	0	0	0	0	0	0	0.00476407128003449	0.00175949355613404	0	0.0045179055893269	0
X4930407I10Rik	0	0	0	0	0	0	0.0306597988717194	0	0.0046106576273187	0.00276058532934031	0.00242257304052551	0	0
X4930408K08Rik	0	0	0.0213657408891139	0	0	0	0	0.0204735113709882	0.00917682924031455	0.00262301659257399	0.0109967795947223	0	0
X4930408O17Rik	0	0	0	0	0	0	0	0	0	0	0.00448881753022913	0	0
X4930412B13Rik	0	0	0	0	0	0	0	0.0240047115173645	0	0.00031661285039742	0	0	0
X4930412C18Rik	0	0	0.0140421827168815	0.026672925913281	0.891929979373677	0.0127502265643731	0	0.0100451378268248	0.00569816588839526	0.0700772029765983	0.0565265773879188	0	0.0546442936229636
X4930412E21Rik	0	0	0	0	0	0.00220095221996845	0	0	0	0.000686682621617451	0	0	0
X4930412F09Rik	0	0	0	0	0	0	0	0	0	0.00134160121734055	0	0	0
X4930412L05Rik	0	0	0	0	0	0	0	0.0223448208057095	0	0.000871484425300964	0	0	0
X4930412M03Rik	0	0	0	0	0	0	0	0	0	0	0.00275223701824843	0.0142631721552022	0
X4930412O13Rik	0	0	0	0	0	0.00959707634666175	0	0	0	0.000540620336669772	0	0	0
X4930413E15Rik	0	0	0	0	0	0.00251719749327405	0	0	0.00874299358351701	0.000812354494754773	0	0	0.00833994969342345
X4930415F15Rik	0	0	0	0	0	0	0	0.0233403821287362	0	0.00174291235872894	0	0	0
X4930415L06Rik	0	0	0	0	0	0.00816609177380579	0	0	0	0.00225577699646931	0.00411584504422031	0	0.0254515988398905
X4930415O20Rik	0	0	0	0	0.335521740877745	0	0	0	0	0.000825513655234128	0	0	0
X4930417H01Rik	0	0	0.0286240339128276	0	0	0.0325558292098724	0	0.0125966795152798	0	0.00939137182184044	0.00216751416470507	0	0
X4930417O13Rik	0	0	0.0418288749898954	0.124044236179705	0	0.00815841687552214	0	0.00770025672655926	0.011457122901452	0.00874519159534033	0.00632827940691595	0	0.020268103860349
X4930417O22Rik	0.298364960019095	0.138604824976539	0.0139414015012101	0	0	0.0348802982867912	0	0.0127475088180892	0.0108168799575113	0.0196971752514492	0.0101572287276875	0	0.0104116373103313
X4930419G24Rik	0	0	0	0	0	0.0067031317031317	0	0	0.00481924691556149	0.00503737733986177	0	0	0
X4930422M22Rik	0	0	0	0	0	0	0	0	0	0.00100323561123904	0.00345460374313225	0	0
X4930423M02Rik	0	0	0	0.0516017173051519	0.113579573849439	0	0	0	0	0.000622178768243778	0.011620295871606	0	0
X4930425K10Rik	0	0	0.0126547357817716	0	0	0	0	0	0.00730822131048101	0.00017309318385006	0	0	0
X4930425L21Rik	0	0	0	0	0	0	0	0.0192326925000192	0.0206763652603981	0.00187764234686492	0	0	0
X4930425O10Rik	0	0	0	0	0	0.163189501689942	0	0.0171445716000171	0	0.00113629179568784	0	0	0
X4930426D05Rik	0	0	0.030981663965515	0	0	0	0	0.00411256078878916	0.00637414036749469	0.0128644625427447	0.0399439574613673	0	0.01423252530543
X4930426I24Rik	0	0.054551802391551	0	0	0	0	0	0	0	0.000929630792761877	0	0	0
X4930426L09Rik	0	0	0	0	0	0.0301312249255546	0	0.00410437760602326	0.0118097103978674	0.0287569741301532	0.00585947638481377	0.0256502334171241	0
X4930427A07Rik	0	0.0257543447579607	0	0	0	0	0	0.0132013201320132	0.0120150210775289	0.00870276954856476	0.0297745450659929	0.00501315954380248	0.0383607705334855
X4930428N03Rik	0	0	0	0	0	0.00363812051783552	0	0	0.00679019848429189	0.0101236072100546	0.00276734488755171	0	0.00775749451545138
X4930428O21Rik	0	0	0	0	0	0.0248343044122767	0	0	0	0.00171587923351759	0.0058981510031468	0	0.0179101055979826
X4930429D17Rik	0	0	0.0439051720588763	0	0	0	0	0	0	0.00160410964081009	0	0	0
X4930429F24Rik	0	0	0	0	0	0	0	0	0	0.00224348814360368	0.0126545459051806	0	0
X4930429H19Rik	0	0	0	0	0	0	0	0	0.00536702105106667	0.00476662808995173	0.00157457006364412	0	0
X4930429P21Rik	0	0	0	0	0	0	0	0	0	0.00212146974707416	0	0	0
X4930430A15Rik	0	0	0	0	0	0	0	0	0.0113735716243363	0.000635828962009219	0	0	0
X4930430F08Rik	0.0567298637348673	0.107592051968857	0.0628437943893532	0.112124517798039	0.0688496598826802	0.119741437325221	0.155739875788397	0.766422788857822	0.472205099759974	0.282256247724039	0.257769392181477	0.394380446154763	0.388193711803195
X4930431F12Rik	0	0	0.0144334509659587	0	0	0	0	0.0433890076815909	0.00567103033547547	0.00392058251192536	0.00389969820024045	0	0
X4930431L21Rik	0	0	0	0	0	0	0	0	0.0166236944165998	0	0	0	0
X4930431P03Rik	0	0	0.00360836274148968	0	0	0	0	0	0	0.00692060717798721	0.00546847271658727	0	0.0118048257699864
X4930432B10Rik	0	0	0	0	0	0	0	0	0	0.00901444848789568	0.0030272463260999	0.00641463563265948	0.0226003001319858
X4930432E11Rik	0	0	0	0	0	0	0	0	0	0.00505803366496459	0.0209991833159522	0	0.0077082459732123
X4930432H08Rik	0	0	0	0	0	0	0	0	0	0.00477066161569305	0	0.00898048988572327	0
X4930432K21Rik	0	0	0.0189975740097989	0	0	0	0	0	0.00358813776009065	0.0199570958046085	0.0194712329162002	0	0
X4930432L08Rik	0	0.0837016204633722	0	0	0	0	0	0	0	0.000263659263641862	0	0	0.014325169896515
X4930432M17Rik	0	0	0	0	0	0	0	0	0	0.00592719605881903	0	0	0
X4930433B08Rik	0	0	0	0	0	0	0	0	0.00648275522283175	0.000970777961055829	0	0	0
X4930433I11Rik	0	0	0	0	0	0.0058122233381691	0	0	0	0.00367522436743489	0.00151926457871097	0	0.00452180141333425
X4930433J02Rik	0	0	0	0	0	0	0	0	0	0.00257580603913362	0	0	0
X4930433N12Rik	0	0	0	0	0	0	0	0	0.00939039437778308	0.000780500586439421	0	0.00798789035821694	0
X4930434B07Rik	0	0	0.0371770706698936	0.0204301778242678	0.108690926481457	0	0	0	0	0.00307345239785515	0	0	0
X4930435E12Rik	0	0	0	0	0	0	0	0	0.00203198218032907	0.00295840434600027	0	0	0
X4930438E09Rik	0	0	0	0	0	0	0	0	0	0.00193663261621687	0	0	0
X4930439A04Rik	0	0	0	0	0	0	0	0	0	0	0	0	0
X4930440C22Rik	0	0	0	0	0	0.00238444047673549	0	0	0.0107210782831694	0.00561065652260779	0.00180314295028807	0	0
X4930440I19Rik	0	0	0	0	0	0	0.0650541901403869	0	0.0137507388565384	0.00589251105413973	0.00405874917631324	0.0145817232680558	0.0160573457928499
X4930441H08Rik	0	0	0	0	0	0	0	0	0	0.00100630939889441	0	0	0
X4930441J16Rik	0	0	0	0	0	0	0	0	0	0.000533314134024509	0.00294340306843883	0	0
X4930442H23Rik	0	0	0	0	0	0	0	0	0	0.00424339565216363	0	0	0
X4930442J19Rik	0	0	0	0	0	0	0	0	0	0	0	0	0
X4930442L01Rik	0	0	0	0	0	0	0	0	0	0.000504359303550412	0.0231327263305944	0	0
X4930443O20Rik	0	0	0	0.0102324819908317	0	0.00812025776946263	0.0240033220597731	0	0	0.000557341057475372	0.00190611252163438	0	0
X4930444A19Rik	0	0.0240920896032997	0	0.0185437930215998	0	0	0	0.0103621037142961	0.012583154310041	0.00841083144375392	0.00111636248021806	0.0303438363609998	0.00668272302251543
X4930444E06Rik	0	0	0.00529292082425597	0	0	0	0	0	0.02084077890411	0.0193363636223033	0.00578217032346789	0.0107677978238281	0.0205433103720483
X4930444G20Rik	0	0	0	0	0	0	0	0	0	0.000655493775267237	0	0	0
X4930444M15Rik	0	0	0	0	0	0	0	0	0	0.00267030997329793	0.010199451129502	0	0
X4930444P10Rik	0	0	0	0	0.205290039816216	0.00906585436611546	0	0	0.046176627994161	0.0512957878405311	0.045216443459108	0.00418646515814372	0.00814134605116302
X4930445B16Rik	0	0	0	0	0	0.00155384508288831	0	0	0	0.00367978289299206	0.0162804933640709	0	0.0182769104806913
X4930445N08Rik	0	0	0	0	0	0.00262173227289506	0	0	0	0.000512031197036773	0.00245506012442245	0	0
X4930445N18Rik	0	0	0.0179445906928586	0	0	0.0458251123683211	0	0.0103621037142961	0.0200017272866145	0.00205056093695602	0	0.0112002150441288	0
X4930447A16Rik	0	0	0	0	0	0	0	0	0	0.000241555958551413	0	0	0
X4930447C04Rik	0	0.0410478700260243	0.0510580576843626	0.0652673350041771	0.172387042839397	0.0569395396082492	0.0278140132561587	0.14817499274503	0.164614676265236	0.120352911165326	0.242088172047445	0.152701198126697	0.133777675235781
X4930447F04Rik	0	0	0	0	0	0	0	0	0	0.000404071505301721	0	0	0
X4930447F24Rik	0	0	0	0	0	0.0184603243379408	0	0.00828188214053526	0	0.194192715471938	0.0157557874465036	0.00418646515814372	0
X4930447M23Rik	0	0	0	0	0	0	0	0	0.00512531917925189	0.00235528626386098	0	0.0202474235153577	0
X4930447N08Rik	0	0	0	0	0	0	0	0	0.00795910294542523	0.00925569081678836	0.00884131868449294	0	0
X4930448A20Rik	0	0	0	0	0	0	0	0	0.00434298083095121	0.00161807601115934	0	0.0224512247143082	0.00631592244047243
X4930448D08Rik	0	0	0	0	0	0	0	0	0	0.00538869716762126	0.00852298892380231	0	0.01423252530543
X4930448E22Rik	0	0.0237721675462369	0	0	0	0	0	0.00445088338908065	0	0.0202277902069773	0.0118950066808634	0.0179333304415087	0.0035631721924341
X4930448I06Rik	0	0	0	0	0	0	0	0	0	0.00237700305228803	0.00281910586982948	0.00939372874668871	0.00628323833076977
X4930448I18Rik	0	0	0	0	0	0	0	0	0.0165822904454501	0.00358282805948395	0	0	0
X4930448N21Rik	0	0	0	0	0	0	0	0	0	0.00407470415384279	0.00436805588315975	0	0
X4930449A18Rik	0	0	0	0	0	0.00238444047673549	0	0	0	0.00139440181476395	0	0	0.0089165023058075
X4930449E01Rik	0	0	0	0	0	0	0	0	0	0	0.00270438088067622	0	0.00686781111871149
X4930449I24Rik	0	0	0	0	0	0	0	0	0	0.0018375116329719	0.00351270616072457	0.0193378712871287	0.00957088002327638
X4930451E10Rik	0	0	0	0	0	0	0	0	0	0.00127968007317795	0	0	0
X4930451G09Rik	0	0	0	0	0	0	0	0	0.0294390469745826	0.0251344439747994	0.020334335764904	0	0.0172916176560126
X4930451I11Rik	0	0	0	0	0	0	0	0	0	0.000795105026064908	0	0	0
X4930452B06Rik	0	0	0.00395823116149148	0	0.226481452760144	0	0	0.0622410190099632	0.0328255439895065	0.0544132116732302	0.0903127305031861	0.0143077891604189	0.0335665086802991
X4930452N14Rik	0	0	0	0	0	0	0	0	0	0.000377172916653302	0.00732504885729859	0	0
X4930453H23Rik	0	0	0	0.0180260729118597	0	0	0	0	0	0.000995898230273984	0	0	0
X4930453N24Rik	0	0.128114873673297	0.204350269498002	0.127679821918715	0.201839647495691	0.252809851120251	0.369093521088295	0.219417122931527	0.28805532578059	0.277756438049251	0.211507127071495	0.191561036259322	0.270508086743482
X4930453O03Rik	0	0.0204903756705475	0	0	0	0	0	0	0	0	0.00211514511587611	0	0
X4930455B14Rik	0	0	0	0.0188616610333172	0	0	0	0	0.0037090749937873	0.0014807018701943	0.00139675962940056	0	0
X4930455D15Rik	0	0	0	0	0	0	0	0	0	0.00177956554407901	0	0	0
X4930455G09Rik	0	0	0	0	0	0.0189937995654841	0	0.0154005134531185	0	0.00893064403944478	0.00203610212226932	0.0743879536796782	0
X4930455H04Rik	0	0	0	0	0	0.00718886588451806	0	0	0.0134773069106239	0.00167211992737912	0.00189868610921243	0.0342003112228321	0
X4930456L15Rik	0	0	0	0	0	0	0	0	0	0.0019726241947457	0.00189819307205085	0	0
X4930458D05Rik	0	0	0	0	0.142234460422792	0	0	0	0	0.0135956413888141	0.0229115561756295	0	0.0142449884926134
X4930459L07Rik	0	0	0.0146144346771306	0	0	0	0	0	0.01169058755724	0	0.00271947229184071	0.0244167450037236	0
X4930461C15Rik	0	0	0	0	0	0.0088577097505669	0	0	0.030156241912436	0.00591239585485692	0.0101822182913259	0	0
X4930461G14Rik	0	0	0	0	0	0	0	0	0	0.00124907918363427	0.00139051579236596	0	0
X4930463O16Rik	0	0	0.00850420405327374	0.0193714356558393	0	0.0105860433604336	0	0	0	0.00169707003294718	0	0	0
X4930465M20Rik	0	0	0.0203048983536788	0	0	0	0	0.0261723238144592	0	0.00478041443466853	0	0	0
X4930466I24Rik	0	0	0	0	0	0	0	0	0.00344963192427368	0	0.00269242781601025	0	0
X4930467D21Rik	0	0	0.0108116991233874	0.0647929472837463	0	0.0151493116152802	0	0.0165511733769796	0.0105679200219813	0.00654584089393879	0.0109066027467012	0	0.0170336522224931
X4930467K11Rik	0	0	0	0	0	0	0	0	0	0.001125293482849	0	0	0
X4930469G21Rik	0	0	0	0	0	0	0	0.0164195524030015	0	0.00211560058080193	0	0	0
X4930469K13Rik	0	0	0	0.039437152953054	0	0	0	0	0	0.00278750293472669	0	0	0
X4930470G03Rik	0	0	0	0	0	0.0130978510754819	0	0.0365153523203662	0.00893663035415866	0.0194118065665743	0.0275158483982312	0	0
X4930470P17Rik	0	0	0	0	0	0	0	0	0	0.00109997212017787	0.00181703741498082	0	0
X4930471C04Rik	0	0	0	0	0	0	0	0	0	0.00110429550010537	0.00260464689843857	0	0.00423415916373663
X4930471C06Rik	0	0	0	0	0	0.00957590243304529	0	0	0	0.000196256967490328	0	0	0
X4930471D02Rik	0	0.0496149876954831	0	0.0936867891153451	0	0.0124096576920022	0.0232859231937109	0.0326442139762938	0.0186133588580213	0.0186998924461232	0.0171461375652344	0.0942415895938958	0
X4930471M09Rik	0	0	0	0.0343557607739666	0	0.0301124033547326	0	0	0	0.00231168478038868	0.00104929900530651	0.00372077794025175	0.00764797298124105
X4930473A02Rik	0	0	0	0	0	0	0	0	0	0.000372410559552452	0	0	0
X4930473D10Rik	0	0	0	0	0	0	0	0	0	0	0	0	0
X4930474H06Rik	0	0	0.00871402740561619	0	0	0	0	0	0	0	0	0	0
X4930474N05Rik	0	0	0	0	0	0	0	0	0.0221024298132543	0.0211796195554005	0.0126597563500738	0.0182037779835622	0
X4930477E14Rik	0	0	0.0315000315000315	0	0	0	0	0	0	0.0026725678647045	0.000832946845996791	0	0
X4930478K11Rik	0	0	0	0.026672925913281	0	0	0	0	0	0.00473616214639915	0.00225025135307614	0	0.00770318696251013
X4930478P22Rik	0	0	0	0.0102324819908317	0	0	0	0	0.0187807887555662	0.00136830955838903	0.00338997832662186	0	0
X4930479D17Rik	0	0	0	0	0	0	0	0	0	0.00906474476509241	0.00464072740786168	0	0
X4930480E11Rik	0	0	0.0171523350331297	0.107167352537723	0	0	0	0.00411256078878916	0	0.00488721696219359	0	0	0
X4930480K15Rik	0	0	0	0	0	0	0	0	0.00571729464478163	0.00316061253839275	0.0167249050228434	0.00570662253545239	0.0415663576942958
X4930480K23Rik	0	0.020395093756246	0	0	0.0733848005401121	0.0058122233381691	0	0.0348136079430728	0.0183224568966797	0.0346185517778825	0.0155049612184422	0	0.012172186665525
X4930481A15Rik	0	0.0523072738495015	0.168304617971693	0	0	0.0615128517041788	0.0306597988717194	0.00714048038295824	0.0425773151278828	0.118836646737648	0.071559720552281	0.0212725521795051	0.0695053479851379
X4930481B07Rik	0	0	0	0	0	0.0107035210302781	0	0	0.0056952862393911	0.0031881588552338	0.00147675586272077	0.0106749219396333	0
X4930483J18Rik	0.204023340270127	0	0	0	0.0410017548751086	0.00983075374355103	0	0	0	0.00420440946102497	0.00535063220587267	0.00478539879120827	0
X4930483K19Rik	0	0	0	0.0427379649890591	0	0	0	0	0	0.0056898485737244	0	0	0
X4930486I03Rik	0	0	0	0	0	0	0	0	0	0	0	0	0.00982457243460765
X4930486L24Rik	0	0.213417909456843	0	0.0360189027201475	0	0.249168482673818	0.0304064121041845	0	0.0166236944165998	0.000789740637328592	0	0	0.00732195209100308
X4930487D11Rik	0	0	0	0	0	0	0	0.0157533653126649	0	0	0	0	0.0109984825204345
X4930488B22Rik	0	0	0	0.0369734973970658	0	0	0	0	0	0.00322751348582221	0	0	0
X4930500F04Rik	0	0	0	0	0	0	0.0232859231937109	0	0.00490625616348431	0.000474971834170234	0.00226805507926399	0	0
X4930500F10Rik	0	0	0	0	0	0	0	0	0	0.00665777587125268	0.0229699628911094	0.00757825495523146	0
X4930500L23Rik	0	0	0	0	0	0.00601980274310372	0	0.0293087963016136	0	0.00259451368575614	0	0	0.0232571120248572
X4930502E09Rik	0	0	0	0	0	0	0	0	0	0.00109788830191989	0	0	0.0402414486921529
X4930502E18Rik	0	0	0	0	0	0.00262173227289506	0	0	0.010578473781263	0.0199464247935902	0.0129511553534012	0.023896487138067	0
X4930503B20Rik	0	0.0709482133630741	0	0	0	0.00320374812901109	0	0	0.011965574377761	0.00781583156599498	0	0.0143077891604189	0.0173449899603865
X4930503E14Rik	0	0	0	0	0	0	0	0	0.00624558125126473	0.00044353283662091	0	0	0
X4930503L19Rik	0	0	0	0	0	0.00805246340960627	0	0	0	0.00561609864869422	0.00398843497155314	0	0.00665745275205782
X4930503O07Rik	0	0	0	0	0	0	0	0	0.00481924691556149	0.00202672323214839	0	0	0
X4930504D19Rik	0	0	0	0	0	0	0	0	0	0.000364859771619675	0.00323898290276038	0	0
X4930504O13Rik	0	0	0	0	0	0	0	0	0.0195297494616398	0.000737240486740914	0	0	0
X4930505A04Rik	0	0	0	0	0	0	0	0	0.00412119443754144	0.00170101446993029	0.00395131974079342	0	0
X4930505G20Rik	0	0	0	0	0	0	0	0	0	0.00253063383746887	0	0	0
X4930505K14Rik	0	0	0	0	0	0	0	0	0	0.00125989886791787	0.00295769432347475	0	0
X4930505M18Rik	0	0	0	0	0	0.0278222934472934	0	0	0.00463957464379666	0.00249764133730728	0.02833310666848	0	0
X4930505N22Rik	0.242459509261953	0	0	0.103614058355438	0	0	0	0	0.0037090749937873	0.004254084688456	0.00835161584836918	0.00833767587285044	0
X4930505O20Rik	0	0	0	0	0	0.0263727719823018	0	0	0	0.00340180494548076	0.00636993848427665	0	0.0114920509452454
X4930506C21Rik	0	0.0253377522373235	0	0	0	0	0	0.0397617208392508	0.022994791094584	0.0147047968999051	0.00918306559329061	0.317293296880456	0.0353241448503226
X4930507D05Rik	0	0	0	0	0	0	0	0.0549323291811164	0.035296413244589	0.00843511630056702	0.00168121930093556	0	0.00667385663488131
X4930507D10Rik	0	0	0	0	0	0	0.0515772317468177	0	0	0.00415297073629228	0.004322851283541	0.0106749219396333	0
X4930509E16Rik	0	0	0.0132142989285846	0	0	0.0276429053540193	0	0	0.0165000981755841	0.00921211142501314	0	0.0076190766441015	0.00901927961209882
X4930509G22Rik	0.565552705704064	0	0.0317990355547633	0	0	0.205737918625909	0.266499144234541	0.252670927795062	0.119718941511093	0.151181754744665	0.11894023830452	0.0312049798971882	0.160357017419522
X4930509J09Rik	0	0	0	0	0	0	0	0	0	0.00225744220759198	0.00361254466516877	0	0
X4930509K18Rik	0	0	0	0	0	0	0	0	0	0.00763946564765123	0.00307186681923165	0.0126754798330543	0
X4930510E17Rik	0	0	0	0	0	0	0	0	0	0.00160815608077613	0.00232135329325749	0	0.0186007752803137
X4930511A02Rik	0	0	0	0	0	0.0111718861718862	0	0	0.00642333778470642	0.00184538640171762	0.0141929630733436	0.0276563969246087	0
X4930511E03Rik	0	0.047009270228089	0	0.0599118098159509	0	0.0223484369349177	0.00744772442228002	0	0.0339461199940619	0.0122878621139557	0.0215350997797156	0.109282733903022	0.0303197048160701
X4930511M06Rik	0	0	0.0520023471383385	0.12586623883456	0	0.0898659293620729	0	0.109496398940021	0.107132056599072	0.288965350295749	0.193729526829197	0	0.0511268086614677
X4930511M18Rik	0	0	0	0	0	0	0	0	0	0.000414723199073851	0.00361788741423798	0	0
X4930511O05Rik	0	0	0	0	0	0	0	0	0	0.000453013034997069	0	0	0
X4930512B01Rik	0	0	0	0	0	0	0	0.0377612131922574	0	0.00275598919107337	0.00757833833490419	0	0
X4930512H18Rik	0	0	0	0	0	0	0	0	0	0.00498832361325604	0.00153039705233285	0	0.00363489910247071
X4930512M02Rik	0	0	0	0	0	0	0	0	0.0120569875982856	0.00278701572542193	0.00357911744129614	0	0
X4930513D17Rik	0	0	0	0	0	0.0167792263700563	0	0	0.00686724044749686	0.00576526819799751	0.00507956227236045	0	0.0283100963870769
X4930513N10Rik	0	0	0	0	0	0	0	0	0.00672504001398808	0.00916915556363182	0.00256669294960247	0.0316393899846482	0
X4930513O06Rik	0	0	0	0	0	0	0	0	0.00829114522272503	0.000708417953771373	0	0	0.0137544014084507
X4930515B02Rik	0	0	0	0	0.187209824771604	0	0	0	0	0.000888535465534763	0	0	0
X4930515L19Rik	0	0	0	0	0	0	0	0	0.00601426342714381	0.0010757498069953	0	0	0
X4930516B21Rik	0	0	0	0	0	0.0080749354005168	0	0	0.0068495777920249	0	0	0	0
X4930516K23Rik	0	0	0	0	0	0.00926914634869787	0	0	0	0.00215066094824397	0.00154120630834236	0	0
X4930517E11Rik	0	0	0	0	0	0	0	0	0.00288841197997753	0.00165176541425057	0.00212993634046266	0	0
X4930517L18Rik	0	0	0	0	0	0.00856492901386833	0	0	0	0.00193608409032517	0.00261302645950593	0	0
X4930518C09Rik	0	0	0	0	0	0	0	0	0	0.000254739167471642	0.0056057833745919	0	0
X4930518I15Rik	0	0	0.0266949755441609	0	0.0857309420115908	0.036320421995817	0	0	0.0482406241811832	0.0349358576179789	0.0252437797581428	0.0197849697134402	0.0155335218344855
X4930519A11Rik	0	0	0	0	0	0	0	0	0	0.00229685384335897	0	0	0
X4930519D14Rik	0	0	0	0	0	0	0	0.0431415690588667	0.0170673356710416	0.000849835645170248	0.00497815912341595	0	0
X4930519F09Rik	0	0	0.0150678883710558	0.13302639070361	0	0.0468157004976987	0.0459577831803705	0.0106910593877658	0.060730499040926	0.0171283531064788	0.0191614701421028	0.0211333833490073	0.0406757913371652
X4930519F16Rik	0	0	0	0	0	0	0	0	0.00648275522283175	0.00706428590092766	0.010465106058227	0	0.0181685565786783
X4930519F24Rik	0	0	0.032107470123999	0	0	0	0	0	0	0.00278991033205797	0.00306946946062055	0	0
X4930519G04Rik	0	0	0	0.0185437930215998	0	0	0.0383691573365666	0	0.0561128049009419	0.00743149059497702	0.0114472211182074	0.0276563969246087	0.0162140700992457
X4930519H02Rik	0	0	0	0	0	0	0	0	0	0.00401833062290582	0.00105391313732235	0	0
X4930519L02Rik	0	0	0	0	0	0	0	0.0213199614535097	0.00779600657359274	0.000331852276622766	0.00517006725505172	0	0.0133832259998608
X4930519P11Rik	0	0	0	0	0	0	0	0	0	0.000289744843447239	0.00245506012442245	0	0
X4930520M14Rik	0	0	0	0	0	0	0	0	0.00230652680195677	0.00231014029274363	0	0	0.00628323833076977
X4930520O04Rik	0	0	0	0.0249202551834131	0	0.00810242345138987	0	0.0230148537866339	0.0553854770398925	0.0172129552489809	0.0278710112050645	0	0.0227710909561185
X4930521E06Rik	0	0	0	0	0	0.0173611111111111	0	0	0	0.00158700536998809	0.00410431466272321	0	0
X4930522H14Rik	0	0	0	0	0	0	0	0	0.0111520764051059	0.000924481461906658	0	0	0
X4930522L14Rik	0	0.109924296414349	0.0120547734454018	0	0	0.00363812051783552	0.0374364983396913	0	0.0161215427465312	0.0133575098075007	0.0150380842631617	0.0140739020597156	0.0373894703635558
X4930522N08Rik	0	0	0	0	0	0	0	0	0	0.00342848345708395	0	0	0
X4930522O17Rik	0	0.0422539972281378	0	0	0	0	0	0	0	0.00396680956498208	0	0	0.00668272302251543
X4930523C07Rik	0.196529292691076	0	0.0295916383682593	0.195951376753148	0	0.307528769741302	1.39600323725599	0.025763700491829	0.0366341525337104	0.0161982319496337	0.0228765317984648	0	0.0613598938144814
X4930524B15Rik	0	0	0	0	0	0	0	0	0.0204693074341752	0.00165001364491655	0.0145204350503618	0	0
X4930524B17Rik	0	0	0	0	0	0.00962901337277377	0	0	0.00408202919303998	0.00176267278977066	0.00446019531873004	0	0
X4930524J08Rik	0	0.0765438902666789	0	0	0	0.00763125763125763	0	0	0.038223200876981	0.0030680696753274	0.00737540095796842	0	0.00788606217371418
X4930524N10Rik	0	0	0	0	0	0	0	0	0	0.000873455428046945	0	0.00522893588540264	0.00477635208974957
X4930524O07Rik	0	0	0	0	0	0	0	0.00927058998034635	0	0.00522384668446547	0	0	0
X4930524O08Rik	0	0	0	0	0	0	0	0	0	0.00398596943739985	0.00234142905844582	0.0101600719333093	0.00415472184137272
X4930525G20Rik	0	0.0278032641032057	0	0	0	0	0	0.0314353785305103	0.0322801920671428	0.016090911008798	0.0077712667044074	0	0
X4930526F13Rik	0	0	0.032107470123999	0	0.130316930775646	0.00155384508288831	0	0	0.00909534100252487	0.0142238746119372	0.00169211609270089	0	0
X4930526L06Rik	0	0	0.00263658220902876	0	0	0	0	0	0	0.00361829134840512	0.00372228539857854	0	0.014800869107034
X4930527A07Rik	0	0	0	0	0	0.00749940004799616	0	0.00714048038295824	0	0.000809544529338888	0.00338501575386332	0	0
X4930527B05Rik	0	0	0	0	0	0	0	0	0	0.00154813568738087	0	0	0
X4930527E20Rik	0	0.0237721675462369	0	0	0	0	0	0	0	0.000523981151436575	0	0	0
X4930528D03Rik	0.0532175319837367	0	0	0.0349995612809643	0	0.0472991092406563	0	0.0131749701916299	0.0040252657883	0.0152978113398687	0.0117809649637124	0	0.00835536348253771
X4930528G23Rik	0	0	0	0	0	0	0	0	0.0175756533347609	0.00260430318727926	0.00111636248021806	0	0
X4930528P14Rik	0	0	0	0	0	0	0	0	0	0.00125866501732813	0.00718273449146248	0	0
X4930529I22Rik	0	0	0	0	0	0	0.0288374332954121	0	0	0.00674685096393422	0.00188522025028184	0	0
X4930532G15Rik	0	0	0.00673310898614191	0	0	0	0	0	0	0.000180223628687421	0	0	0.0277691384902475
X4930532M18Rik	0	0	0	0	0	0.00251719749327405	0	0	0.00317339829068075	0.0105204804349593	0.00272352515665717	0	0
X4930533B01Rik	0	0	0	0	0	0	0	0	0	0.000535510074684913	0.00176185623535017	0	0
X4930533D04Rik	0	0	0	0	0	0	0	0	0.0174745134221738	0.00323146826364989	0.00518792719326174	0.00484748597258747	0.00667385663488131
X4930533I22Rik	0	0	0	0	0	0.0441960775509484	0	0	0.00960027341578688	0.0131260311628248	0.00780054048754607	0	0
X4930533O14Rik	0.13574414942716	0.38521861077685	0.63884225400325	0.352203506684674	0.18462447382025	0.283719672257847	0.0817639183951892	0.18256323276283	0.339729387552719	0.375601662205354	0.386356325172094	0.596221333719034	0.530248785994718
X4930533P14Rik	0	0	0	0	0	0	0	0	0	0	0	0	0
X4930534D22Rik	0	0	0.0148094176048433	0	0	0	0	0.0422848178475759	0.0147296230394872	0.00566470408376822	0.00721839081724191	0	0.00950884893481874
X4930535E02Rik	0	0	0	0	0	0	0	0	0	0.00219463073741659	0.00122814877696032	0	0
X4930535G08Rik	0	0	0	0	0	0	0	0.0229189585625229	0.0056517738657455	0.000244069805428771	0	0	0
X4930535I16Rik	0	0	0	0	0	0	0	0	0	0.000243820224034213	0	0	0
X4930535L15Rik	0	0	0	0	0	0	0	0	0	0.000955335669129044	0	0	0
X4930535O05Rik	0	0	0	0	0	0	0	0.00445088338908065	0	0.00177603785191782	0	0	0
X4930538E20Rik	0	0	0	0	0	0.00632463064157053	0	0.0131749701916299	0	0.000938637314783121	0.00147096116721357	0	0
X4930538K18Rik	0	0.0240920896032997	0	0	0	0.002375305939405	0	0	0.0227971785968705	0.0356739809454398	0.0459402079611123	0	0
X4930539C22Rik	0	0	0.0276512732028746	0	0	0	0	0	0.00366618370806619	0.000759453423099152	0	0	0
X4930539E08Rik	0	0	0	0.0102324819908317	0	0.00952860104890841	0	0.0241428678346986	0.0168954207247977	0.0509708176740243	0.0882601832139404	0.00372077794025175	0
X4930539J05Rik	0	0	0.0196543198229539	0	0	0.0368413369224449	0	0	0.0135604030675854	0.0472791300458198	0.030406390457055	0.113987918440987	0.0229295492847007
X4930539M17Rik	0	0	0	0	0	0	0	0	0.00464281005149805	0.00340743530789143	0.004322851283541	0.0045179055893269	0
X4930540M05Rik	0	0	0	0	0	0	0	0.0144371392519829	0.0193822113940268	0.00977671050239887	0.00318788530756808	0	0.00658277577222543
X4930542C16Rik	0	0	0	0	0	0	0	0	0.00407328823117051	0.0100170060839894	0	0	0
X4930544D05Rik	0	0	0	0	0	0	0	0.0155602547524908	0	0.00165826611324332	0	0	0
X4930544G11Rik	0	0	0	0	0	0	0	0	0.0164784878775113	0.000541430620852236	0.0011253855008033	0	0.00335185793485329
X4930544I03Rik	0	0	0	0	0	0	0	0	0	0.0019531099840557	0	0.00584301569726167	0.00901927961209882
X4930544M13Rik	0	0	0	0	0	0	0	0	0.0101311577171454	0.00701553028867111	0.00111525540017817	0	0
X4930545L23Rik	0	0	0	0	0	0	0	0	0.00697515936495359	0.00292645567308171	0.0156517924995723	0.0188410848696668	0
X4930547E08Rik	0	0.0253377522373235	0.00322585431912861	0	0	0	0	0	0	0.000439041020261085	0	0	0
X4930547M16Rik	0	0	0	0	0.238301106224295	0	0.0677148932136134	0	0	0.0061168898460518	0	0	0
X4930548G14Rik	0	0	0	0	0	0	0	0	0	0.00162704793657268	0.00183967321516744	0	0
X4930548H24Rik	0	0.0237721675462369	0	0.148047332576057	0.0730545571432746	0.0348889160756522	0	0.0622922884461016	0.0465210834224937	0.0203045719467893	0.0167704995792639	0.00418646515814372	0.0233104424091392
X4930548K13Rik	0	0	0	0	0	0	0	0	0.0111241263389277	0.00108916266807822	0.00165028592853998	0	0
X4930549C01Rik	0	0	0	0.0173418423973363	0	0	0	0	0	0.00037081782387785	0	0	0
X4930550C14Rik	0	0	0	0	0.258837883808821	0.0364683555729048	0	0.057801753211308	0	0.0083266629479719	0.00134820020665213	0.0502161574130162	0.00781084019645825
X4930550C17Rik	0	0	0	0	0	0	0	0.0195054966489557	0	0.00585509914857546	0	0	0
X4930550L24Rik	0	0	0.0176591085681995	0	0	0	0	0	0	0.000882025839601105	0.0129071411450446	0.0179691290363156	0.00356605910529003
X4930551L18Rik	0	0	0	0	0	0	0	0	0	0.000627172970050816	0.00250198095846873	0	0
X4930551O13Rik	0	0	0	0	0	0	0	0	0.00669124584306352	0.00179116049129496	0	0	0.00901927961209882
X4930552N02Rik	0	0	0.0126547357817716	0	0	0.0603877902729351	0	0	0.0154157898870016	0.025826711854556	0.0382164829888785	0	0.0311832921395347
X4930552P12Rik	0	0	0	0	0	0.00553077767158685	0	0	0.00261705566582083	0.00166086496331913	0.00776002284550726	0	0
X4930553M12Rik	0	0	0	0	0	0	0	0	0	0.00292491810179845	0	0	0
X4930553P18Rik	0	0	0	0	0.113579573849439	0.0132831760605288	0	0	0	0.0459412315386285	0.0237550139632128	0.0181575779445108	0.043470700747696
X4930554C24Rik	0	0	0	0	0	0	0	0	0.0152578387861656	0.00161456850896608	0.00116725613101283	0.020185504789011	0
X4930554G24Rik	0	0	0	0	0	0	0	0	0.00642643785120483	0.000912659185612422	0.00392188904418968	0	0
X4930554H23Rik	0	0	0	0	0	0	0	0	0	0.00131353721649935	0.00535527485011668	0	0
X4930555A03Rik	0	0	0	0	0	0.0618309209444998	0	0	0	0.00487370079987058	0	0.0101862038055657	0
X4930555B11Rik	0	0	0	0	0	0	0	0	0	0.00146531502902509	0	0	0.00718597298074159
X4930555B12Rik	0	0	0	0	0	0	0	0	0	0.00248155275719123	0	0	0
X4930555F03Rik	0	0	0.0668730121180338	0	0	0.0398013514115702	0.0382141751661361	0.0618164855916407	0.112196523340706	0.109732527162029	0.0664005665273398	0.0145348491303232	0.0278367997404291
X4930555G01Rik	0	0	0	0	0	0	0	0	0	0	0	0	0
X4930555M17Rik	0	0	0	0	0	0.00815458483377694	0	0.00941069299402139	0.0031184026294371	0.00456430471217314	0	0	0.00386003810629619
X4930555O08Rik	0	0	0	0.0390234765234765	0	0	0	0	0	0.00135254785282293	0.00259539908413557	0	0
X4930556G22Rik	0	0	0	0	0	0	0	0	0	0.000279553525065119	0	0	0
X4930556I23Rik	0	0	0	0	0	0.00457352768996605	0	0	0	0	0	0	0
X4930556J24Rik	0	0	0.00263658220902876	0	0	0.00395920435829216	0	0	0	0	0	0	0
X4930556L07Rik	0	0	0	0	0	0.014137712631198	0	0	0	0.000410683268127098	0.00127930373126843	0.00826805018706464	0.0102686694679597
X4930556M19Rik	0	0	0.00263658220902876	0	0.0410017548751086	0.0608915706110506	0	0.0314317146000314	0.00691359253774476	0.0157326237863094	0.00423423867168994	0.00701948961291025	0
X4930556N13Rik	0	0	0.0189666585110035	0	0	0	0	0	0	0.00167943248226175	0.00344078207600275	0	0
X4930557A04Rik	0	0	0	0	0	0	0	0	0	0.00205648731652924	0	0	0
X4930557F10Rik	0	0	0	0	0	0	0	0	0	0	0	0	0
X4930557J02Rik	0	0	0	0	0	0	0	0	0.00917050910998375	0.00262405294833637	0.0026720225720059	0	0
X4930558C23Rik	0	0	0	0	0	0	0	0	0	0.00286532891267358	0	0	0
X4930558F17Rik	0	0	0	0	0	0	0	0	0	0	0	0	0
X4930558J18Rik	0	0	0	0	0	0	0	0	0.0048367523529591	0.00605029077629061	0.00109022244898849	0	0
X4930558J22Rik	0	0	0	0	0	0.006294819112078	0	0	0	0.0041902343718071	0	0	0
X4930558K02Rik	0	0	0	0	0	0.00553077767158685	0	0	0.0180313797686994	0.00205440198742753	0.00740529206884448	0.024002023048904	0.0342438985787625
X4930558N11Rik	0	0	0	0.0399004085801839	0	0.0146507266760431	0	0	0	0.000245936937342401	0	0	0
X4930562A09Rik	0	0	0	0	0	0.0100760946669246	0	0	0	0.00167161111033462	0	0	0
X4930562C15Rik	0	0	0.0362486276165014	0	0	0.0380761991860761	0	0.0859481491005363	0.00340639018360102	0.0312630862017259	0.0260146024650275	0.0100517665979796	0.0270258127879919
X4930562D21Rik	0	0.0909951226614253	0	0	0	0	0	0.023624409685063	0	0.00132319772699316	0.00255771221849819	0	0
X4930562F07Rik	0	0	0	0	0	0	0	0	0	0.000919469768934894	0	0	0
X4930563D23Rik	0	0	0	0	0	0	0	0	0	0.00582433844362369	0	0	0
X4930563E18Rik	0	0	0	0	0	0	0	0	0	0.00388633302419359	0	0	0
X4930563E22Rik	0.292141396435875	0.0551000617120691	0.0125788019122397	0	0	0.0328399113278745	0	0.0356599679416888	0.0357333136197637	0.169624264942905	0.244780279706907	0.0218432719437102	0.0158662955780962
X4930563F08Rik	0	0	0	0	0	0	0	0	0	0.00287837063095908	0	0	0
X4930563H07Rik	0	0	0	0	0	0	0	0	0	0	0.00144265670425653	0	0
X4930563I02Rik	0	0	0	0	0	0.00437859044416422	0	0	0	0.00133526256921031	0	0	0
X4930563M21Rik	0	0	0	0	0	0	0	0	0.011439501054722	0.00131066310876814	0.00194594476786046	0	0
X4930564D02Rik	0	0	0	0	0	0	0	0	0	0.00158648326291627	0	0	0
X4930565D16Rik	0	0	0	0	0	0	0.0150477540474696	0	0	0.00541534910667485	0.00148727192685002	0	0
X4930565N06Rik	0.0567298637348673	0	0	0	0	0	0	0	0	0.00454675771736636	0	0.0101862038055657	0
X4930566F21Rik	0	0	0.0232634963173885	0	0	0	0.0306597988717194	0	0	0.00461969805098279	0.00149273872176186	0	0
X4930567H17Rik	0	0	0.0354794875342821	0	0	0.0264835138419042	0	0	0	0.010796032635334	0.00866736124063589	0.00515945289161537	0
X4930568A12Rik	0	0	0	0	0	0	0	0	0.00534547540252766	0.006069776590082	0.00457837369393131	0	0
X4930568D16Rik	0	0	0.0121028158411336	0.0227769679300291	0	0	0	0	0	0.00701847293930557	0.00235424847680124	0	0
X4930568G15Rik	0	0	0	0	0	0	0	0	0.0584986550295119	0.0113898233987923	0.0185076297639938	0	0.0461148690857891
X4930570D08Rik	0	0	0	0	0	0	0	0	0	0	0	0	0
X4930570G19Rik	0.144300144300144	0	0.18340010996732	0.272277447465368	0	0	0	0.182031101009862	0.0778521560126528	0.152909050609351	0.113339883273369	0.0189874120256274	0.0279079667230423
X4930570N18Rik	0	0	0	0	0	0	0	0	0	0.00330628513886545	0	0	0
X4930571N24Rik	0	0	0	0.0204301778242678	0	0	0	0.0248331830925756	0	0.00302464988129689	0.00214493589215605	0	0
X4930572K03Rik	0	0	0	0	0	0.00711812673682292	0	0	0	0.00401416539673203	0	0	0
X4930572O03Rik	0	0	0	0	0	0	0	0	0	0	0	0	0
X4930573C15Rik	0	0	0	0	0	0	0	0	0.0044003896985117	0	0	0	0.00371622877104314
X4930573I07Rik	0	0	0	0	0	0	0	0	0	0	0.0020165355918532	0	0
X4930577H14Rik	0	0	0	0.0390234765234765	0	0	0	0	0.00805540183163727	0	0	0	0
X4930578C19Rik	0	0	0	0	0	0.006294819112078	0	0	0	0.00103698332433814	0.0053885724218272	0	0
X4930578G10Rik	0	0	0	0	0	0	0	0	0	0.0015727888185567	0.00148727192685002	0	0
X4930578I06Rik	0	0	0	0	0	0	0	0	0.00464281005149805	0.00133987221303878	0.00139316590822715	0.00372077794025175	0
X4930578M01Rik	0	0	0	0	0	0	0	0.0304318121992006	0	0.0357215815469225	0.023615901858242	0.0218444348571647	0.00448894283600635
X4930579C12Rik	0	0	0	0	0	0	0	0	0.00613904067666962	0.00498633242963028	0	0	0
X4930579D09Rik	0	0	0	0	0	0	0	0	0	0.00105223129456018	0	0	0
X4930579F01Rik	0	0.0240920896032997	0	0.0173418423973363	0	0	0	0.03981097747893	0.00745553148247279	0.000447486757748121	0	0.0202474235153577	0
X4930579G18Rik	0	0	0	0	0	0	0	0	0	0.000511207848676342	0.00139675962940056	0	0
X4930579G24Rik	0	0.0887234442185903	0.0313280235704118	0.0193714356558393	0	0.0879510911378458	0.0445061596524959	0.0280879151744962	0.10313714103706	0.0914165726049705	0.063942928682252	0.039053926371117	0.0755808710330912
X4930579H20Rik	0	0	0	0	0	0.0118728804155735	0	0	0	0.00169250793935274	0.000929485856757306	0	0
X4930579K19Rik	0	0	0.00529292082425597	0	0	0	0	0	0.0332473888331995	0.00385184059988079	0.00689396460842356	0	0.00379595381690748
X4930579M01Rik	0	0	0	0	0	0	0	0	0.00310676136903789	0.00149006619741321	0.0173225972838888	0	0
X4930579O11Rik	0	0	0	0	0	0	0	0	0	0.00284552707661751	0	0	0
X4930580E04Rik	0	0	0	0	0	0.00238444047673549	0	0	0	0.00379927938864281	0	0	0
X4930581F22Rik	0.0814000814000814	0	0.0468587155598409	0.015628125625125	0	0.0751823014065251	0.0232859231937109	0.230367891518848	0.0870794381275142	0.0139111628282878	0.0657187372462366	0.0672863013244175	0
X4930583I09Rik	0	0	0	0	0	0	0	0	0	0.00173683399878213	0	0	0
X4930583K01Rik	0	0	0.0298433411112541	0.0500616685206599	0	0.0114974245768948	0	0	0	0.00309007590648773	0.0117951810375353	0.00427503890285402	0
X4930583P06Rik	0	0.0348645859481773	0	0.0188616610333172	0	0	0.0144187166477061	0	0	0.00317134296220602	0.00183967321516744	0	0
X4930584F24Rik	0	0	0	0	0	0	0	0.0131749701916299	0	0.00247221848189311	0	0	0
X4930586N03Rik	0	0	0	0.0188616610333172	0	0	0	0	0	0.00154875347863403	0.00289273506943721	0	0.00335185793485329
X4930587A21Rik	0	0	0	0	0	0	0	0	0	0.00211073628473142	0.00225476296127941	0	0
X4930588K23Rik	0	0	0.0152353093529564	0	0	0.0247158821792463	0.0488746609320398	0	0	0.0078509798785673	0.00174357579498338	0.0247524752475248	0.0107484241751602
X4930589L23Rik	0	0.109103604783102	0	0	0	0.00833779480245637	0.0299661382637619	0	0.0457887275207192	0.00883014005221013	0.00491556750511715	0.0540412606626727	0.0109334785299282
X4930589P08Rik	0	0	0.013966460940697	0	0	0	0	0	0	0.000788136466716893	0	0	0
X4930590J08Rik	0.0567298637348673	0	0.04033515340048	0	0	0.0141765571388047	0	0	0.0146602017021379	0.0250319081642461	0.00924793372965701	0	0
X4930590L14Rik	0	0	0.0121091030181939	0	0	0	0	0.0195981593408747	0	0.00242063804025304	0.00270438088067622	0	0.0101356556147478
X4930590L20Rik	0	0	0	0	0	0	0	0	0	0.0024648580178919	0	0	0
X4930591A17Rik	0	0	0	0	0	0	0	0	0	0.000431167921796487	0	0	0
X4930593A02Rik	0	0	0	0	0	0.0087329532752068	0	0	0	0.00186366213171217	0	0.0041487492558181	0
X4930593C16Rik	0	0.0501826649002369	0	0	0	0.00558055644844459	0.0304064121041845	0	0.022404920914561	0.0197322206063389	0.00925563400860062	0	0
X4930594M17Rik	0	0	0	0	0	0	0	0	0.0196685069833034	0.00123063670066301	0	0	0
X4930594M22Rik	0.414800066368011	0	0	0.0173418423973363	0	0.0835137536882532	0	0	0.00501150893025834	0.035402225215905	0.0329036825375605	0	0.00711770115335229
X4930594O21Rik	0	0	0	0	0	0.0410847681003991	0	0.021142408923788	0	0	0	0	0.00477635208974957
X4930595D18Rik	0	0	0	0	0	0	0	0	0	0.000788348088921565	0	0.0159693388693708	0
X4930595M18Rik	0	0	0	0	0	0	0	0	0	0.00512048449262177	0.00215823487465835	0	0
X4930596D02Rik	0	0	0	0	0	0	0	0	0	0.00148387997469287	0	0	0
X4930596I21Rik	0	0	0	0	0	0	0	0	0	0.00104723903888744	0.00551692915456026	0	0
X4930597A21Rik	0	0	0	0	0	0.00262173227289506	0	0	0	0.00184144880193353	0	0	0
X4930597O21Rik	0	0	0	0	0	0.0196170747018205	0	0	0.00615038301510227	0.00744879850033164	0.0141432056274701	0.0485128906758306	0
X4930598A11Rik	0	0	0	0	0	0	0	0	0.0102600336254928	0.00243545152067059	0.00366504964676251	0.0251740558650163	0.00882045781704253
X4930598F16Rik	0	0	0	0	0	0.0208416700013339	0	0.0364677351713072	0	0.0027628629179309	0.00657664554248118	0	0
X4930599A14Rik	0	0	0	0	0	0	0	0	0	0	0	0	0
X4930599N23Rik	0	0	0.0186480186480187	0	0	0	0.0453286554160944	0	0	0.00475935630746228	0	0.00570662253545239	0
X4931400O07Rik	0	0	0	0	0	0	0	0	0	0.000307460813350686	0.00295769432347475	0	0
X4931403E22Rik	0	0	0	0	0	0.0124720625798212	0	0	0	0.00429864879186621	0	0	0.0046251500861203
X4931403G20Rik	0	0	0	0	0.0730545571432746	0.0044883948063886	0	0	0.00578435240125821	0.00246577698673336	0	0	0
X4931403M11Rik	0	0	0	0	0	0	0	0	0.00240266676789903	0.000953774648443443	0	0	0
X4931406B18Rik	0	0.0762113798832442	0.0112175280606464	0	0	0.00901875901875902	0	0	0.0245448465026662	0.0269049687928422	0.0113744378289711	0	0.0258796431021808
X4931406C07Rik	1.12261296228584	0.90538073225708	0.495727039709476	0.250921248834987	1.97294792333021	0.284893035915514	0.17629585575761	0.631269925187405	0.757510926282283	0.163067322777507	0.232999129026703	0.441492297005972	0.507894017271649
X4931406G06Rik	0	0	0	0	0	0	0	0	0.0162782142147878	0.000658056653413406	0.00408490724809603	0	0.00371622877104314
X4931406P16Rik	0.271168928909025	0.205835578846539	0.516655598420305	0.305617101020357	0.179761859377221	2.99260767726543	1.30277983985638	0.482539506266716	0.601610597075317	0.232216000470356	0.224642633144905	1.26861182232516	1.04448802248104
X4931408C20Rik	0	0	0	0	0	0	0	0	0	0.00782796980440103	0.00356843618280099	0.0222639513273496	0
X4931409K22Rik	0	0	0	0	0	0	0	0	0	0.00051115256286898	0.00348398943389033	0	0
X4931413I07Rik	0	0	0	0	0	0	0	0	0	0.00370599506618622	0	0	0
X4931413K12Rik	0	0	0	0	0	0	0	0	0.00230652680195677	0.00167877101844037	0.00189868610921243	0	0.00833994969342345
X4931414P19Rik	0	0	0.109188966650079	0	0.134799956864014	0.0473679931976911	0.0150477540474696	0	0.047140521419697	0.0846811827872111	0.0477365801581759	0.0526723269532311	0.0685359048726656
X4931415C17Rik	0	0	0	0	0	0	0	0	0.0208708138365147	0.016732660273443	0.0226859604847006	0	0
X4931417E11Rik	0	0.0462410639143985	0	0	0	0	0	0	0	0.00127033599152067	0	0	0.00417838704232038
X4931419H13Rik	0	0	0	0	0	0	0	0	0	0.00183695178382733	0.00223477270573764	0	0
X4931422A03Rik	0	0	0	0	0	0	0	0	0	0.00547564517979322	0.00284488870226419	0	0
X4931423N10Rik	0	0	0	0	0	0.00363735828852108	0	0	0.0358804442146626	0.00553479373946823	0.0140110329364176	0	0
X4931428F04Rik	0	0	0.0369931767763899	0.121209178830058	0.159377789111309	0.00598246420093422	0	0.066683781055006	0.365616973453339	0.248258939856072	0.356455404778398	0.020156457332511	0.142954548360225
X4931428L18Rik	0	0	0	0	0	0	0.0726950225718045	0	0	0.00247808309907736	0.00113844284698144	0	0
X4931429L15Rik	0	0	0	0	0	0	0	0	0	0.00187006545278458	0	0.00930981673625755	0
X4931429P17Rik	0	0	0	0	0	0	0	0	0	0.00154143675464759	0.00492251954240258	0	0.0153131593398519
X4931431B13Rik	0	0	0	0.0193714356558393	0	0	0	0	0	0.002543537309599	0.00148199523983129	0	0.00452180141333425
X4931431C16Rik	0	0	0	0	0	0	0	0	0.00693158731269985	0.00114987973650663	0.00139675962940056	0	0
X4931431F19Rik	0	0	0	0.030517578125	0	0	0	0.0178299839708444	0	0.00111961637416294	0.00197299366274436	0	0
X4931440F15Rik	0	0	0.0205412873179887	0.0408817373103087	0	0.031029415729936	0	0	0.0285489677193303	0.0295569961550486	0.0271327036772144	0	0.0487404057172398
X4931440J10Rik	0	0	0	0	0	0	0	0	0	0.00215831295171505	0.00269242781601025	0	0.00329323490512849
X4931440P22Rik	0	0.32708740171635	0.0474622336226745	0.0423979681189527	0.23198653425707	0.0666041677955121	0.120223748008787	0.153146957185075	0.152124653328359	0.05120558974967	0.0642708279305628	0.0500571889535796	0.0373762779791503
X4932411E22Rik	0	0	0.0129428224930724	0	0	0.00967192819560508	0	0.0305303425809741	0	0.00685584974172563	0.014005886889334	0	0
X4932411K12Rik	0	0	0.00768800241095756	0	0.318309766225105	0.00369071239606954	0	0	0	0.00292769369900593	0.00392019786709035	0.015220584318232	0.0100776381241081
X4932411N23Rik	0	0	0	0	0	0.0168064967193718	0	0	0.00608295076642138	0.00715137006863583	0.00185390350506412	0	0
X4932412D23Rik	0	0	0	0	0	0	0.0601500141352533	0.0193681339964982	0.00560420001165673	0.00828906278437876	0.00579538272107722	0	0.0360885220226354
X4932413F04Rik	0	0	0	0	0	0	0	0	0.0428195191176214	0.00213436322938966	0.00381919619669166	0	0.00980815253638825
X4932414J04Rik	0	0	0	0	0	0	0	0.0247772525000248	0	0	0	0.00528757815701463	0
X4932414N04Rik	0	0	0	0	0	0	0	0	0	0.00417426397978945	0.000869248055231326	0	0
X4932415D10Rik	0	0	0	0	0	0	0	0	0.0112652954549039	0.000439513107379645	0.009991746397021	0	0
X4932415M13Rik	0	0	0	0	0	0	0	0	0	0.00438356658488576	0.00183023072620627	0	0
X4932429P05Rik	0	0	0	0	0	0	0.0473375021893595	0.00411256078878916	0.0291734819026034	0.00137153532462678	0	0	0.00415472184137272
X4932430I15Rik	0	0	0.0313201554933911	0	0	0.00150573383444155	0	0	0.0271292612100032	0.0286847263096056	0.0234872773593414	0.00924893984027081	0.0220621896020882
X4932435O22Rik	0	0.0167467159689985	0	0	0	0.0173274738970464	0.094472418777338	0	0.00756137378063396	0.01109101846811	0.00626023492352082	0	0.0660153566543582
X4932438A13Rik	0	0.39456444926296	0.450693618258571	0.309208199133902	0.50992215935977	0.513628376706488	0.800567402908115	0.842285604737083	0.637903740687686	0.977107022274964	1.13650386461364	0.585094737314023	0.322624050526213
X4932438H23Rik	0	0	0.012372623837592	0	0.183063010288141	0.00437859044416422	0	0.366683582258296	0.00957955340122043	0.0102993284584078	0.00478217881340395	0	0.0492619091708704
X4932441J04Rik	0	0	0	0	0	0	0	0	0	0.00181910721765998	0	0	0.0206644714968685
X4932443I19Rik	0	0	0.00360836274148968	0	1.13560683627232	0	0	0.0738923605863404	0	0.0424424243885602	0.0411157007985559	0	0
X4932443L11Rik	0	0	0	0	0	0.00150573383444155	0	0.0674312966664104	0.0103329443183343	0.00307341877323562	0.0032018018377535	0	0
X4932702P03Rik	0	0	0	0	0.089937763067957	0	0	0.0294672324375295	0	0.0173681672943996	0.0171434361791715	0.00372077794025175	0
X4933400A11Rik	0	0	0.00263658220902876	0	0	0	0	0	0	0.000893783688393089	0.00225025135307614	0	0.014395448734928
X4933400C23Rik	0	0	0	0	0	0.00534516967706623	0	0	0.0159824699144506	0.00117432887769441	0.00226034060620527	0.015350372246527	0
X4933400F21Rik	0	0	0	0	0	0.00718886588451806	0	0.0179560937595392	0	0.0120016930421608	0.00527356958691972	0	0
X4933401H06Rik	0	0	0	0	0	0	0	0	0	0.00151284954342777	0	0	0
X4933402C06Rik	0	0.0217019540439421	0	0	0	0	0	0	0	0.00231785804539692	0.0048684259210575	0.00768114049574081	0.0105142374047784
X4933402D24Rik	0	0	0	0	0	0	0	0	0	0.00474300096619347	0.013130285023969	0	0
X4933402E13Rik	0	0	0	0	0	0	0	0	0	0.00436775608420809	0	0.00729623441341923	0.0172016597191291
X4933402J07Rik	0	0	0	0	0	0.00904695732731168	0	0.012876824163103	0	0.00127941231169733	0	0.00958933665763671	0
X4933402J10Rik	0	0.0430207446030476	0	0	0	0	0	0	0	0	0.00250083527898318	0	0.00415178252630984
X4933402N03Rik	0	0	0	0	0	0.00457625815937344	0.0443274200554979	0	0.0058299383658916	0.00132944273286738	0.00260464689843857	0	0
X4933402N22Rik	0	0	0	0	0	0	0	0	0	0	0	0	0
X4933402P03Rik	0	0	0	0	0	0	0	0	0.00875448995903774	0.00199117516662002	0	0	0.018244041321999
X4933403O08Rik	0	0	0	0	0	0	0	0	0.00580905695150005	0.000996083114991718	0.00464483401300273	0	0.0200001464739654
X4933404I11Rik	0	0	0	0	0	0.00546634480828436	0	0.0328718130777221	0	0.00132197860275034	0	0	0
X4933404K08Rik	0	0	0	0.0382778049975502	0	0	0	0	0	0.00468215196630331	0.00328241648875969	0	0
X4933404O12Rik	0	0	0	0	0	0.0338690278851149	0	0.12332105252973	0.0720246547428992	0.0751501505217728	0.0823329903491013	0.0920862696848393	0.104037093186869
X4933405D12Rik	0	0	0.0732249246847544	0.0468375299760192	0.124396676120814	0.174431544677938	0.0586063412061185	0.0693630683925895	0.0513161502097925	0.111839793544017	0.121986260274976	0.0565802144190708	0.0341052829628784
X4933405E24Rik	0	0	0	0	0	0.00749940004799616	0	0	0	0.00213662518726161	0	0	0
X4933405L10Rik	0	0	0	0	0	0	0	0	0	0.00247067502569861	0.00246874080394051	0.00410233689621293	0
X4933405O20Rik	0	0	0	0	0	0.00500176061973815	0	0	0	0.00182712140517362	0	0	0
X4933406C10Rik	0	0	0	0	0	0.0153914547320082	0	0	0	0.0103932300670275	0.0149980835540509	0.0435747375569477	0.0143720852000809
X4933406D12Rik	0	0	0	0	0	0	0	0	0	0.000791115020251569	0	0	0.00522655003794475
X4933406F09Rik	0	0	0	0	0	0	0	0	0	0.000176347015657411	0	0	0
X4933406G16Rik	0	0	0	0	0	0	0	0	0	0	0.00213991262308777	0	0
X4933406I18Rik	0	0	0	0	0	0	0	0	0	0.0311698332751689	0.0168959653083983	0.00346855494798035	0.00691637548725865
X4933406J08Rik	0	0	0.0133352536098532	0	0	0	0	0	0.00837984847557986	0.00534233120939262	0	0.00537367169552776	0.0248351352438924
X4933406J10Rik	0	0	0	0	0	0	0	0	0	0.00161842730775007	0	0	0
X4933406K04Rik	0	0	0	0.0193714356558393	0	0.0140235146293305	0	0	0	0.00134995869838945	0	0	0
X4933406M09Rik	0	0	0	0	0	0	0	0	0	0.00156987818607882	0.000832946845996791	0	0
X4933406P04Rik	0	0	0	0	0	0	0.0655694708543702	0	0	0.00751891679248643	0.0035104793472615	0	0
X4933407E24Rik	0	0.0194715423408688	0.0213657408891139	0	0	0	0	0	0	0.000520223696189361	0	0	0
X4933407I08Rik	0	0	0	0	0	0	0	0	0	0.00192654087362012	0.00279645811800606	0	0
X4933407K13Rik	0	0	0.00740470880242164	0.112087517934003	0.130316930775646	0.0410435544076735	0	0.108211647595785	0.0600685770694948	0.0232139861778886	0.0236133716739475	0	0.0480282966118851
X4933407L21Rik	0	0.0556947925368978	0	0	0.924090731651941	0.023519916675875	0	0.370382575655847	0.075285796739302	0.23031304480946	0.0702201408306245	0.00418646515814372	0
X4933408A14Rik	0	0	0	0	0	0	0.0671654823153285	0	0	0.00160388377654716	0	0	0
X4933408B17Rik	0	0	0.00322585431912861	0	0	0.116292452596534	0.0383691573365666	0.210534861339264	0.0569925989991685	0.0476000049582569	0.0373014561263047	0	0.0678232871493946
X4933408J17Rik	0	0	0	0	0.158931977113795	0.00936413760038355	0	0.00921879897486955	0	0.00230557776725729	0.00847853545055235	0	0
X4933409D19Rik	0	0.130924325739722	0	0	0	0.00238444047673549	0	0.0260278393769976	0.00918949567128807	0.000399763621013016	0.00286608175670176	0	0
X4933409G03Rik	0	0	0	0	0	0.0128791625453347	0	0	0	0.00221417029263678	0	0	0
X4933411G06Rik	0	0	0	0	0	0	0	0.0278508863544582	0	0.00128285492288202	0	0	0
X4933411K16Rik	0	0	0	0	0	0	0	0	0	0.00241239237837073	0.00147096116721357	0	0
X4933411O13Rik	0	0	0	0	0	0	0	0	0	0	0.00260557530581637	0	0
X4933412E24Rik	0	0	0	0	0	0	0	0	0.00261705566582083	0.00116296450921039	0.00753238359412502	0	0
X4933413C19Rik	0	0	0	0	0	0	0	0	0.0137367884886168	0.00393764729807114	0.00910164854241095	0	0.00885372582490163
X4933413G19Rik	0	0	0	0	0	0.00582392187558239	0	0	0.0090767411231741	0.001327159142024	0	0.0468098152905091	0
X4933413J09Rik	0	0	0	0	0	0	0	0.0476926305347298	0.00230652680195677	0.00736461291844783	0	0	0.00750364046116313
X4933413L06Rik	0	0	0	0.045421511627907	0	0.0286520106538061	0	0.0303060609091212	0.00960720001998298	0.00703103813944316	0.00266737512149894	0.00606678314890313	0.00649294995493893
X4933414I15Rik	0	0	0	0	0	0.0138115442411385	0	0	0.0161400960335714	0.00518544728169836	0.0144125900070437	0.00729623441341923	0.00236158736456296
X4933415A04Rik	0	0	0.0109027237184393	0	0	0	0	0	0.0193136604201928	0.00423401498481222	0.00587983619265834	0.00718243750381567	0.0504890258184402
X4933415F23Rik	0	0.0348645859481773	0	0	0	0.00500176061973815	0	0	0.00608295076642138	0.00113837110899093	0	0	0
X4933416C03Rik	0	0	0	0	0	0	0	0	0.0078697276759435	0.00302420366389548	0	0	0
X4933416E03Rik	0	0	0.00848562916273146	0	0	0	0.0820634021845278	0	0	0.00346963243488324	0	0	0.00322093556582819
X4933416M07Rik	0	0	0	0	0	0	0	0	0	0.00508691073644717	0	0	0
X4933417A18Rik	0	0	0	0	0	0	0	0.0351847551492889	0	0.000512031197036773	0.0018245205342488	0	0
X4933417D19Rik	0	0	0	0	0	0	0	0	0.00473358664333324	0.00769727301659739	0	0	0.00865992808795716
X4933417E11Rik	0	0	0.00929426766747341	0	0	0.00363812051783552	0	0	0.00775966155460164	0.000521551281268955	0.00150891557858764	0	0
X4933417O13Rik	0	0	0	0	0	0	0	0	0	0.00130772858840761	0.00276734488755171	0	0
X4933421A08Rik	0	0	0	0	0	0	0	0	0	0.000297734685644276	0.00538551203362417	0	0
X4933421I07Rik	0	0	0	0	0	0.00251719749327405	0	0	0.00485084853467993	0.00114422576549954	0.00380924519044702	0.0220757861739351	0
X4933421O10Rik	0	0	0.0938769695641549	0.119972588456384	0.258216136446358	0.18966175989093	0.450590120749672	0.116952132616046	0.195618412241458	0.274569889312757	0.234634104749432	0.126424599758783	0.203652743635018
X4933423P22Rik	0	0	0	0.0185437930215998	0	0.032135494781967	0.0348737048777851	0.0239501453773824	0.019784363187965	0.0198135695544632	0.0264768400570971	0	0
X4933424G06Rik	0	0	0	0	0	0	0	0	0	0	0.00703721249347348	0	0
X4933424M12Rik	0	0	0.0468714815783344	0	0	0.00865890828484344	0	0	0	0.00953872071423815	0	0.00530173499277639	0
X4933425L06Rik	0	0	0	0	0	0	0	0	0	0.00215026070259292	0	0.0090751513281484	0
X4933426K07Rik	0	0	0.0125188095112907	0	0	0	0	0	0	0.000653836350296195	0.00100924223670687	0	0.00744896712621828
X4933427D06Rik	0	0	0	0	0	0.0445311375673851	0	0.0488173045167519	0.059743878329423	0.0454039344631244	0.0454076634958239	0.00427503890285402	0.0547010417369079
X4933427D14Rik	0.10016627601819	0.0580346002286563	0.038984165142742	0.037291169451074	0.089937763067957	0.0846742573066268	0.164594983768896	0.0132476904909907	0.0961210409460959	0.144963769852452	0.220432595536368	0.0382775761101457	0.0898064064944069
X4933427E13Rik	0	0	0	0	0	0.00500176061973815	0	0	0	0.00304119026739284	0.00159919963256789	0	0
X4933427G17Rik	0	0	0.0123529535294241	0	0	0	0.0651822495697972	0	0	0.0712451536111703	0.0220689684179749	0.102966033857855	0.026956895447888
X4933427G23Rik	0	0	0	0.0966893564356436	0.220981260789085	0	0	0	0.00795910294542523	0.00961687204488266	0.0103038213361526	0	0
X4933427I04Rik	0	0	0.0405165378824338	0	0	0.0154539419873956	0.0488746609320398	0.0939373951415797	0.148307378653306	0.101661127279036	0.192997298309021	0.0266104795598288	0.0456007954610086
X4933427I22Rik	0	0	0	0	0	0	0	0	0	0.00203409871506257	0.00150798174738893	0	0.00447411278343504
X4933427J07Rik	0	0	0	0	0.180949623624783	0	0	0.0179560937595392	0.0162131611143296	0.0319338604699579	0.0399060503952758	0.00546261522703995	0.00743795259941567
X4933428C19Rik	0	0	0	0	0	0	0	0	0.00560655967481954	0.000206110814655056	0	0	0
X4933428G20Rik	0	0	0	0	0	0.00952860104890841	0	0.0247772525000248	0	0.00187746191624282	0.00232911949035139	0	0.00371622877104314
X4933428M09Rik	0	0	0	0	0	0	0	0	0.00415203593005812	0.00221970577492629	0	0.0066183088897125	0
X4933430I17Rik	0	0	0	0	0	0	0.0651822495697972	0	0	0.0051284716153313	0.0223787188707491	0.00605010088543226	0.0131189521630528
X4933430L12Rik	0	0	0	0	0	0	0	0	0	0.000237111985501076	0.00186074621877761	0	0
X4933430M04Rik	0	0	0.0196543198229539	0	0	0	0	0	0	0.00107772285437744	0	0	0
X4933431E20Rik	0.410031436817151	0.0907205632557521	0.102758857203693	0	0.123005264625326	0.245725055568541	0.0617333589172942	1.48758005207637	0.744062159427201	0.704609923103229	1.01993344609457	2.31301147146994	1.38977686052475
X4933431G14Rik	0	0	0	0	0	0	0	0	0.00642333778470642	0.000833843083484259	0	0	0.00415178252630984
X4933431K23Rik	0	0	0	0	0	0.00493073306194579	0	0.0167784953380951	0.0118530423730775	0.0122634669105483	0.0106420363854852	0.0289545576541183	0.00396925573279606
X4933431M02Rik	0	0.0533572373756776	0	0	0	0.0204618866116672	0	0	0	0.00185486425344096	0.00295769432347475	0	0
X4933432K03Rik	0	0	0	0	0	0	0	0.0422037088619348	0.00952473478375995	0.0038067107501768	0.00191685892761711	0	0
X4933433F19Rik	0	0	0.00322585431912861	0	0	0.00150573383444155	0	0	0.00340639018360102	0.00179977542922699	0	0	0
X4933433G15Rik	0	0	0	0	0	0.0189325093905247	0	0	0.0196976024078349	0.00353911091766458	0.00454916645104775	0.0176488237059	0
X4933434E20Rik	2.35348737623893	0.526300271571845	0.890304153133994	0.733555194133239	12.8123109044258	0.599250662407928	0.386471718574992	1.12388254659528	1.08489029309908	1.02070289111786	1.07640108170221	0.537170491292994	1.1308085826894
X4933434M16Rik	0	0	0	0	0	0.0060554974227803	0	0	0.0255721700042467	0.00157863487752693	0.0035476542200766	0	0
X4933435F18Rik	0	0	0.0468973183863893	0	0	0.0113992850368425	0	0.0215005213876437	0.0308721723215434	0.0200460306115679	0.012568021549098	0.0244354871634284	0
X4933436E23Rik	0	0	0	0	0	0	0	0	0.00553202294461837	0.000750535859149187	0.00245300051022411	0	0.00615474001147244
X4933436I01Rik	0	0	0	0	0	0	0	0.00411256078878916	0	0.000581905700435527	0.00250083527898318	0	0
X4933436I20Rik	0	0	0	0	0	0.0070373372967617	0	0	0	0.00332506336086	0	0	0
X4933438A12Rik	0	0.042644286944878	0	0	0	0	0	0	0	0.00127220685589124	0	0	0
X4933438B17Rik	0	0	0	0	0	0.00816609177380579	0	0	0.0210106618085955	0.000661447031597233	0	0	0
X4933438K21Rik	0	0	0	0	0	0	0	0.00502256891341242	0	0.00283870148367561	0.00365679915981382	0	0.00668272302251543
X4933439C10Rik	0	0.0556947925368978	0.101145105054503	0	0.0733848005401121	0.0672977149894952	0.0278140132561587	0.127735025219188	0.122942728340017	0.230632697545402	0.217856870163526	0.007765482430596	0.0424751457544237
X4933439K11Rik	0	0	0	0	0	0.00310769016577662	0	0	0.00852469860928067	0.00687947275484043	0.0124273135926007	0	0
X4933440J02Rik	0	0	0	0	0	0	0	0	0	0.00198143164754216	0	0	0
X4933440M02Rik	0	0	0.0107271161113775	0	0	0	0.0947427261272016	0	0.0240683783930195	0.0122669750669894	0.00216751416470507	0	0
X5031410I06Rik	0	0	0	0	0	0	0	0	0	0.0049664879949085	0	0	0
X5031414D18Rik	0	0.435533373516121	0.176077389590574	0.131302521008403	0	0	0	0.0219291032093243	0	0.00619291030596108	0.00148019469888991	0	0
X5031415H12Rik	0	0	0	0	0	0.0113619837114602	0	0	0.0145704014242954	0.00377158369894196	0	0	0
X5031425E22Rik	0	0.0635647088736334	0	0	0.123005264625326	0.00807118136267369	0	0.0391149718957519	0.0473017699034242	0.0300146818456403	0.00851593361748659	0	0.0697863345840493
X5031425F14Rik	0	0	0	0	0	0.0178320681133153	0	0	0.0242640915218094	0.0237698466062516	0.00684343364187078	0	0
X5031434C07Rik	0	0	0	0	0	0.0037997616789475	0	0	0.00203198218032907	0.00560111023864743	0.00318903161447581	0.0150242641866615	0
X5031434O11Rik	0	0.0235046351140445	0.0134895968229302	0.0297279299847793	0.131068470168816	0.0252687110367896	0	0.185471560502055	0.0533351700768528	0.112166919535816	0.0920194637986751	0.0518648248078918	0.140030642839728
X5031439G07Rik	0.112574580659687	3.09165949593048	1.530322197361	2.38123445824764	0.113750113750114	0.665388321272796	1.22947151697372	2.96863915348361	0.874727210002575	0.327258845635176	0.484873170100751	6.87888237887216	4.6748798963197
X5033403F01Rik	0	0	0	0	0.11108148938061	0.0105860433604336	0	0	0	0.00223836916518697	0.00489840205803746	0	0.0239866203392178
X5033403H07Rik	0	0	0	0	0	0.0120730953484778	0	0	0	0.00693047127071948	0	0	0.00379595381690748
X5033404E19Rik	0	0	0	0	0	0.0546034625951834	1.58654298664949	0.0195981593408747	0.0186231877310439	0.00259335102686511	0	0	0.01576548101342
X5033417F24Rik	0	0	0	0	0	0	0	0	0.0108521428098585	0.0187748096746359	0.00789523184338155	0.0178069038127193	0
X5033426O07Rik	0	0	0	0	0	0.0311549258858844	0	0.0107467601204927	0.156612159928801	0.00366309432863516	0.00568791634991238	0	0.0549416215846868
X5033428I22Rik	0	0	0	0	0.103211956072991	0	0	0	0.0107716121342495	0.00418216978826532	0.00306047088705334	0	0.0186007752803137
X5033430I15Rik	0	0	0	0	0	0.036835975271873	0.0264477498254448	0.0206787596052838	0	0.029667055247483	0.0567693437757997	0.00346855494798035	0
X5330411J11Rik	0	0	0.0131102493307218	0	0	0	0	0	0	0.00494417785521603	0.0118411826075248	0.00999595163958597	0.00923211001720865
X5330411O13Rik	0	0	0.0180139283694152	0	0.159377789111309	0	0	0	0	0.00112880415556521	0.0111517033111637	0	0
X5330413P13Rik	0	0	0.0121153967307813	0	0.464731496315708	0	0	0	0.0341795038692966	0.0351031508553745	0.0293939375705226	0.0157396030096566	0.0657318501155969
X5330416C01Rik	0.100973383416132	0	0	0.0360189027201475	0	0	0	0	0.0324005190090466	0.0103989069528208	0.00245501117733853	0.0254530845137111	0.0126799649680062
X5330417C22Rik	0	0	0.00263658220902876	0.0102324819908317	0	0	0	0.048534265191225	0.00807396325483714	0.147330008675353	0.148179136788626	0.0074415558805035	0.00281330038395924
X5330417H12Rik	0	0	0	0	0	0.0221160651096957	0	0	0	0.0011454084583833	0.00136328637084443	0	0
X5330429C05Rik	0	0	0	0	0	0.0152558094122242	0	0	0	0.00941755113899859	0.00762765135636551	0	0
X5330434G04Rik	0	0.130924325739722	0.00791646232298296	0	0	0.0127045248978131	0	0.0564514150025911	0.0598173390416444	0.291975433601916	0.412703826500183	0.0146993526222773	0.0284762541052913
X5330439A09Rik	0	0	0	0	0	0	0	0	0	0.0137110940057766	0	0	0
X5330439B14Rik	0	0	0	0	0	0	0	0	0	0.00682387548318075	0	0	0
X5330439K02Rik	0	0	0.0153355416513311	0	0	0	0	0	0.0199335018378689	0.0118477034395236	0.00116725613101283	0.0168814835447739	0.00610458869723194
X5430400D12Rik	0	0	0.0121343171837706	0	0	0	0	0.0387310673448005	0.0126154232379881	0.0131269953251708	0.0147638371820811	0	0
X5430401F13Rik	0	0	0	0	0	0	0	0	0	0	0	0	0
X5430402E10Rik	0	0	0	0	0	0	0	0	0	0	0	0	0
X5430402O13Rik	0	0	0.0263874288090958	0	0.262136940337632	0.0137661646087539	0	0.00505333032154846	0	0.0149248001463651	0.0155050906138099	0.0206485716350571	0.0313705055129751
X5430405H02Rik	0	0.0821534455862934	0.00352274796887159	0	0	0.0755825850259084	0.0267576426516824	0.127213238814333	0.0439720556046537	0.0718625003533843	0.0431818168786124	0.0253196758603008	0.0916910898835822
X5430416N02Rik	0.780687143180296	0.0360836274148968	0.0625874391197203	0	0	0.435342669323311	0.12283336377391	0.00890176677816129	0.14343671617657	0.185581099494629	0.12924398940895	0.112799357427802	0.136030863310305
X5430416O09Rik	0	0	0	0	0	0.104920610137602	0.31207138595954	0	0.00430228731104892	0.0278425822372787	0.0109557945134551	0.0208222715015981	0.0085163273760354
X5430419D17Rik	0	0.0348645859481773	0	0	0	0.0252771187547208	0	0	0.00329430460853449	0.00416479746466318	0.015199264261419	0	0.011926895435422
X5430427O19Rik	0	0.260950151204761	0.0336601046354783	0.560739714781922	0	0.0196846527411281	0	0.0520556787539953	0	0.00447064873725547	0.00596267052805722	0	0.0124862651083808
X5430434I15Rik	0	0	0	0	0	0	0	0.0476926305347298	0	0.00113146185365823	0	0	0
X5530400C23Rik	0	0	0	0	0	0	0	0	0	0.000833274736269214	0.00466680752533484	0.0166403194941343	0.00827721382360926
X5530401A14Rik	0	0	0	0	0.336316305875696	0	0	0	0.00441937578084846	0.00882801451895471	0.00464431388119033	0.00522893588540264	0
X5530601H04Rik	0.563629695290194	0.0235046351140445	0.231134349870101	0.235974389793176	0.269072091508208	0.300623830499147	0.11602307467155	0.173730173200879	0.477887131876401	0.485557950050398	0.377044529623604	0.248452906798529	0.308329672812349
X5730403I07Rik	0	0	0	0	0	0.0117067505806548	0	0	0.0147459349143925	0.00479200309127208	0.016774744210715	0.0421073214288712	0.0207849250053739
X5730405O15Rik	0.298364960019095	0	0	0	0	0.0047189755670321	0	0.0532712687649112	0	0.00748325674037456	0.0129379495937484	0.00944300438627554	0.019068452644859
X5730409E04Rik	0	0.15044054941431	0.0450832868563713	0.194372793297111	0.179875526135914	0.265074545564546	0.0512578680827507	0.203135781226885	0.0793005397183873	0.585923318799562	0.512756604438835	0.186677876453553	0.174246410987715
X5730419F03Rik	0	0	0	0	0	0	0	0	0.0122498428957649	0.00262309664346104	0.0102477802182771	0	0
X5730420D15Rik	0	0	0	0	0	0	0	0	0	0.000808506169328488	0.00275223701824843	0	0
X5730422E09Rik	0	0	0	0.0681124673060157	0	0	0	0.021142408923788	0	0.0050871879022002	0.0148862667608778	0.00361218172163805	0.00833663065616731
X5730435O14Rik	0	0	0	0	0	0	0	0	0	0.000441207452435079	0.0111517033111637	0	0
X5730455P16Rik	0.0773790179055047	0.158806635293336	0.405117594576606	0.207496387821886	0.759864128684933	0.438884364469516	0.205838426994168	0.750287717248306	0.777322100849843	1.1594625926503	1.36845681906535	0.534667337330238	0.633222753390643
X5730460C07Rik	0	0	0	0	0	0	0	0	0	0.00468203149347938	0.00677340563845737	0.00826805018706464	0
X5730480H06Rik	0.394851141119798	0	0.0198912614485887	0.116953592814371	0.103211956072991	0.19498797411021	0.0521457996558377	0.143901928775145	0.417487376759107	0.207847075296685	0.181970367984644	0.130866812722668	0.179692702583852
X5730507C01Rik	0.0982646463455378	0	0.0203403344764601	0	0.214004451292587	0.0200705844803	0	0.00984585332041557	0.00656738650171042	0.00987798031093284	0.0176283729025134	0	0.025863665757814
X5730508B09Rik	0.0814000814000814	0	0.0104529252511315	0.0102324819908317	0.159377789111309	0.352927614894172	0.60617566987457	0.0135778299085163	0.0344531383397112	0.733211896070304	0.10562310543559	0.210643277099732	0.145217245758676
X5730522E02Rik	0	0	0	0	0	0.0240792109724149	0	0	0.00648275522283175	0.00481143744454291	0	0.00746962663071286	0
X5730559C18Rik	0	0	0	0.0102324819908317	0.524019948167341	0.0189810073989651	0	0	0.740882340920509	0.0128611730543824	0.0133118255894336	0	0.601880875645043
X5730596B20Rik	0	0	0	0	0	0	0	0.00927058998034635	0.00679366287127368	0.00455490825338252	0.00989124155352953	0	0.0034531006772221
X5830405F06Rik	0	0	0	0	0	0	0	0	0	0.00519038486187658	0.00163460230779692	0	0
X5830411N06Rik	0	0	0	0	0	0.0164868021552183	0.013529145160963	0	0	0.00420755930536343	0.00192899894985297	0	0.00878743888336257
X5830416I19Rik	0	0	0.00263658220902876	0	0	0	0	0	0.00825309700853892	0.004127016584607	0.00722498921369356	0	0
X5830418P13Rik	0	0	0	0	0	0.00493073306194579	0.128842734558198	0	0.005719750527361	0.032512462827239	0.0223330213546459	0.00484748597258747	0.0135646030204594
X5830432E09Rik	0	0.154787706945704	0.0477175502764039	0.152886497064579	0	0.00807118136267369	0	0	0.00672843821510682	0.00347334715666784	0.0112088664559595	0.00959863315463878	0.00885372582490163
X5830444B04Rik	0	0.0556947925368978	0.206014250182759	0.125578768385016	0	0.0958506580552682	0	0.0486265349351346	0.0272489496358062	0.0234847829683466	0.0188857722088013	0.00584301569726167	0.0074600143232275
X5830454E08Rik	0	0	0	0	0	0.102197635978336	0.0748729966793826	0.0337457058589294	0	0.0441725957933677	0.0300086307049603	0	0.0425477539979777
X5830468F06Rik	0	0	0	0	0	0.00919550376647834	0	0	0.00569041847337453	0.00222226757123026	0.00110497188730524	0	0
X5930403N24Rik	0	0.0233171978324333	0.0340044103720252	0	0	0	0.0598780882123995	0.0415658694332909	0	0.0113473721787714	0.00616702099729911	0	0.00411250497613102
X5930412G12Rik	0	0	0.0166738364163257	0.030517578125	0.168182145578802	0.0160069274144913	0.446428970534142	0.241280377388357	0.00752798662377419	0.0105296728847147	0.00744794313886389	0	0.0089778856720127
X5930422O12Rik	0	0	0	0	0	0	0	0	0	0.0334920613142465	0.00912052850492918	0	0
X5930430L01Rik	0	0.0204903756705475	0	0.0188616610333172	0	0.025832635171533	0	0.115230235995918	0.066324134916791	0.0638660020954154	0.0557411139209399	0.0131476417084404	0.0213091435688504
X6030407O03Rik	0	0	0	0	0	0	0	0	0.00736481151974359	0.00145524810921269	0.00234067932131535	0.0343397678291337	0.00593581719582498
X6030408B16Rik	0	0.865442146558614	0	0	0	0.0253623700483017	0.106642778684241	0.161000595464262	0.0211969889439801	0.0553175863860642	0.0304313675592434	0	0.0195143383554962
X6030419C18Rik	0	0	0.0364797892009507	0.114385065885798	0	0.0354257719121746	0	0.233508980272895	0.39685952125128	1.55263240833533	0.68088429708008	0.0208822351001064	0.0560019174473398
X6030442E23Rik	0	0	0	0	0	0	0	0	0.0090767411231741	0	0.00207462509449917	0	0
X6030442K20Rik	0	0	0	0	0	0	0	0	0	0.0112588135184252	0.0152058187574949	0	0
X6030443J06Rik	0	0.215242991669652	0.145926952904682	0.439588296445428	0.199933731988904	0.426548452449847	0.20553836151749	0.632076348744786	0.450250612723518	0.381819018614364	0.472191813117037	0.30925292313508	0.542231858065521
X6030445D17Rik	0	0	0	0	0	0.00962901337277377	0	0	0	0.00279426921809908	0.006861121275605	0	0
X6030452D12Rik	0	0	0	0	0	0	0	0	0	0.00160471002862655	0.00115736882844646	0	0
X6030458C11Rik	0.298364960019095	0.121547095083961	0.122850239340019	0.0490426867545512	0	0.0402098186080713	0.073181356760683	0.137407882756809	0.185934657830337	0.256670512613057	0.206748757659316	0.0833990489906418	0.36130293752992
X6030468B19Rik	0	0	0.0278205379210123	0	0	0.011421783625731	0	0	0	0.00156974696936749	0	0	0
X6030469F06Rik	0	0	0	0	0	0	0	0.0521379152133223	0	0.000885503748703312	0	0	0
X6030471H07Rik	0	0	0	0	0	0	0	0	0	0	0.020403527170177	0	0
X6030498E09Rik	0	0	0	0	0	0	0	0	0	0.00236355096583699	0.00270138267570873	0	0
X6230400D17Rik	0	0	0	0	0	0.0442129577249119	0	0.0297595133724373	0.0220475187824184	0.0653157858121973	0.0310302267684902	0.0288782227252521	0.0431814575292615
X6330403A02Rik	0	0	0.0378136940424337	0.151025682139689	0	0.122304553660308	0.404642481186725	0.123614281493391	0.067779416949258	2.46722369565407	1.35662190857873	0.13992854577206	0.0569630767200919
X6330403K07Rik	0.0773790179055047	0.0760132567119706	0.218891006439001	0.164378036747078	2.61665606237333	0.146876005082564	0.0612930850768716	0.849428338713362	1.82356442460772	5.02003862145417	11.6328621271902	0.268094239897441	0.23212116336211
X6330403N20Rik	0	0	0	0.0659564477540271	0	0.0260760726902006	0	0.0278508863544582	0.0146482191666552	0.0220452861721757	0.0119094630894722	0	0.0317306797743775
X6330408A02Rik	0	0.0509107941065665	0.022185696976096	0.0680531358885017	0	0.146953548319245	0.323918853568928	0.0121630492963707	0.117694046079962	0.212903473774761	0.195119615926798	0.0320960559538327	0.0846335012315328
X6330409D20Rik	0	0	0	0	0	0.00575633657530209	0	0	0.00699347648513467	0.0608376336828634	0.136038286734508	0.0158976211245527	0
X6330410L21Rik	0	0	0	0	0	0.0354384568437577	0	0	0.0074181499875746	0.0366601463039122	0.00256338271451903	0	0.0278849858226571
X6330416G13Rik	0	0.410085915962335	0.566479746588599	0.288973061369895	0.606867516499794	0.0182149515303155	0	0.0321790087912136	0.0495432939821408	0.0897302034986547	0.180583639125519	0.230447780244887	0.0845341086453414
X6330418K02Rik	0	0	0.0580322062446352	0.030517578125	0	0.0155241831509193	0.0278140132561587	0.105779808750106	0.048487038510553	0.0789244553019931	0.0438493397543098	0	0.0125351611269611
X6330549D23Rik	0	0	0.00360836274148968	0	0.267379679144385	0	0	0.160210195776859	0	0.0270804547949767	0.0206851580797129	0	0.0127897633259692
X6330562C20Rik	0	0.190953014620385	0.0490458912633753	0	0	0.00321561606058735	0.157963355163857	0.0770810006049804	0.0819348822624521	0.0861337155577296	0.023927398387475	0.110261124982567	0.15421711188187
X6430503K07Rik	0	0	0	0	0	0	0	0.0761291676870867	0.104245729158925	0	0	0.0493191643850146	0.0623284851657329
X6430531B16Rik	0	0	0.030711493162086	0	0.159377789111309	0	0.0369560075685903	0.0218275795833552	0.00814906929479584	0.0158173097560236	0.0139353059645804	0.0228961470874238	0.0158251419774329
X6430548M08Rik	0.199576896978406	0.0556947925368978	0.0105379852215295	0	0.223338761198538	0.0924732797215931	0.0369560075685903	0.206477683404853	0.13003483092674	0.561930999868839	1.30578193811201	0.171242686285997	0.163111225419939
X6430550D23Rik	0	0	0.00991072419643848	0.0815843460175059	0	0.0058122233381691	0	0.0751386447788998	0.0158448237028357	0.0201270592619732	0.0100723617181787	0.0130447827391435	0.0109022017517847
X6430562O15Rik	0	0	0	0	0	0.0185200722257256	0	0	0	0.0198887253215492	0.0224371053158093	0	0.0108324322842199
X6430571L13Rik	0.144387651968004	0	0.0167584037981658	0	0	0.029895838899048	0	0.033168944352252	0.0341191313525366	0.124481680531447	0.166423054183751	0	0.00865992808795716
X6430573F11Rik	0	0	0.00263658220902876	0	0.286231512845595	0.109875225502125	0.301663678632516	0.346430938605614	0.115647697271155	0.140320980301142	0.208513126429639	0.0744727736172322	0.0320078935331414
X6430584L05Rik	0	0	0	0	0.220530898875605	0.0200706486833654	0	0	0	0.00478298136350829	0.0139495807379964	0	0
X6430590A07Rik	0	0	0.026749902985818	0.0599118098159509	0	0.0570061030306295	0	0	0.0557107167104582	0.0249463810940393	0.0215474698080429	0.0164879102398167	0.0162925446101329
X6430628N08Rik	0	0	0	0	0	0	0	0	0.00497406769805618	0.055408727451761	0.00428316583566189	0	0
X6430710C18Rik	0	0	0	0	0	0	0	0.00783926373634988	0	0.00411925529180742	0.00632530067964231	0	0
X6530401F13Rik	0	0	0	0.0343406593406593	0	0	0.0992881042922247	0	0	0.00479009448448741	0.00169211609270089	0	0.0056637071908692
X6530402F18Rik	0	0	0.0111906016850808	0.10490823065908	0	0.0947618375449785	0	0.252800199113013	0.0227292293155695	0.0155568640375024	0.0194612468191391	0.0280971630946402	0.010089188425683
X6530403H02Rik	0	0.0339865549188741	0	0	0	0.0171722167271129	0	0	0	0.0253301621189229	0.0164145937651486	0	0.0276897434161185
X6530409C15Rik	0	0	0	0	0	0.00594558599695586	0	0	0	0.0030095622950021	0.0135774723138789	0.0200650247846364	0.0222727183879343
X6530411M01Rik	0	0	0	0	0	0.0305116188244484	0	0.0144371392519829	0.0202668572355885	0.00176010254788671	0.00437850145556421	0	0.00859860014789592
X6720483E21Rik	0.191087671023466	0	0.00263658220902876	0	0	0.002375305939405	0	0.0185724818964733	0	0.0152398128723845	0.0122141454675004	0	0.0109590001884948
X6720489N17Rik	0	0.313987907665067	0.0127796180427759	0.0185437930215998	0	0.0514948215958347	0	0.187043267252201	0.122244129125839	0.0495264399586379	0.0457415158230448	0.0536642977971369	0.0247459998951435
X6820408C15Rik	0	0	0	0	2.36008119370803	0	0	0	0.0161412837660045	0.0398035552245677	0.0444242584931098	0.00254230070586979	0.013403603961033
X6820431F20Rik	0.288669037000459	0.20492631952544	0.359440672193316	0.302575274583081	0	0.62885537169577	0.889136009120349	0.49201688744487	0.626266884413665	0.692963748890344	0.706172955880185	0.275019578510995	0.377653412853612
X7330404K18Rik	0	0	0.0152852611869005	0	0	0	0	0	0.0420612341106039	0	0	0	0
X7420426K07Rik	0	0	0	0	0	0	0	0	0	0.00191555189024471	0.00260464689843857	0	0
X7420461P10Rik	0	0	0	0	0	0	0.0240033220597731	0	0	0.0010599668609544	0	0	0
X7530416G11Rik	0	0	0.0156864221467182	0	0	0	0.013529145160963	0	0	0.00472483434659914	0.00208974886234072	0.0194117289687936	0.0170432079407714
X7530428D23Rik	0	0	0	0	0	0.00712396844936853	0	0	0.295832251929203	0.00272971721743402	0.00425227744403627	0.040480225544243	0.154506678016853
X7630403G23Rik	0	0	0	0	0	0	0	0	0.00741309242217913	0.0010008500250222	0.00234067932131535	0	0.03916714972818
X8030411F24Rik	0	0	0	0	0	0	0	0	0	0	0	0	0
X8030423F21Rik	0	0	0	0	0	0	0	0	0.00909534100252487	0.00720150813749552	0.00567455300550942	0	0
X8030423J24Rik	0	0	0.012191434785577	0	0	0	0	0	0.0213049267643142	0.000814437993507267	0.00120685843164402	0	0
X8030442B05Rik	0	0	0.013974834118719	0	0	0	0	0	0	0.00190072426046818	0.00226805507926399	0	0
X8030443G20Rik	0	0	0	0	0	0	0	0	0	0.0040399887080926	0	0	0
X8030451A03Rik	0	0	0	0.0188616610333172	0	0	0	0	0.0162782142147878	0.0111817119513256	0.00572565383348304	0	0.0074600143232275
X8030453O22Rik	0	0	0.0179445906928586	0	0	0.00998338764296211	0	0	0	0.00635385929823501	0	0	0
X8030462N17Rik	0.0761904761904762	0.0318054018294467	0	0	0	0.0194519418485597	0	0	0	0.0085541254192209	0.0200683582830319	0	0.0333718867155457
X8030474K03Rik	0	0	0	0	0	0.0299001971311848	0	0	0.00676604635553679	0.00318521306832289	0.0325342238535509	0	0
X8430408G22Rik	0	0.0579770642733735	0.0339425166509258	0	0	0.827646808545602	0	0	0.011499316210584	0.00192568840963751	0	0	0.00884260864028976
X8430423G03Rik	0	0	0	0	0	0	0.0264477498254448	0	0	0.000920209898550418	0	0	0
X8430429K09Rik	0	0	0.0154473315507113	0.0306974459724951	0.340738721548317	0.00957590243304529	0.00744772442228002	0.0276950140106215	0.0505875424565017	0.154656961160102	0.114596123045892	0.0457270922349234	0.0208075677773911
X8430436N08Rik	0	0	0	0	0	0	0	0	0	0.000857500174798884	0	0	0.014002959476928
X8430437L04Rik	0	0	0.0187832581063846	0	0	0	0	0	0	0.000887055515479602	0	0	0
X9030204H09Rik	0	0	0	0	0	0	0	0	0.0111989732781299	0.00241040885098235	0.00966669312933727	0.0117939131614174	0
X9030407P20Rik	0	0	0.0168097839869744	0	0.344218662081641	0.0452333871360224	0	0.0259052592857402	0.00509394767700704	0.0975095943701065	0.0602485337907151	0.0349180917160812	0.0209873392295676
X9030612E09Rik	0	0	0	0	0.113750113750114	0.0345074864542348	0	0.0644594657826888	0.0360156047798341	0.0181926414087697	0.0621848423507545	0	0.00694091614540387
X9030616G12Rik	0	0	0	0	0	0	0	0	0	0.000558834048640915	0	0	0
X9030617O03Rik	0	0.115267018640012	0.24517441774303	0.026672925913281	0.0730545571432746	0.00954606184332455	0	0.0404834777126436	0.0140223165130443	0.0741437210516565	0.136947355335739	0	0.00522655003794475
X9030619P08Rik	0	0	0	0	0	0	0	0	0.0141354344243062	0.00190554204993752	0.00259539908413557	0	0.00593581719582498
X9030622O22Rik	0	0	0	0	0	0	0	0	0.00697515936495359	0.000253497858513466	0.00245506012442245	0	0
X9030624G23Rik	0	0	0	0	0	0.0134062634062634	0	0	0	0.00129316874574818	0	0	0
X9030624J02Rik	0.862614163480706	0.777646054387129	0.811586884138711	0.504178063636839	0.701160165372499	0.381968969857967	0.278634168083901	0.474012920223767	0.661330114941084	0.520638801984433	0.554088850653553	0.612182280895559	0.488699542998318
X9130008F23Rik	0	0	0.0213266452973681	0	0	0	0.0150477540474696	0	0	0.000255170813256175	0	0	0
X9130015L21Rik	0	0	0	0	0	0	0	0	0.0166236944165998	0.00442136736285655	0.00308892521464941	0	0.0170762694498709
X9130017K11Rik	0	0	0	0.0545184926727146	0	0	0.0306597988717194	0	0.0147459349143925	0.00402922934356166	0.0208376211312407	0.00427503890285402	0.00236158736456296
X9130019O22Rik	0	0	0.0141358540388255	0.0286907822254866	0	0.103207852641432	0.0540172639175481	0	0.0545474626550796	0.0258267932725974	0.0144419783623148	0.00949735261295914	0.0357972942279685
X9130019P16Rik	0	0	0	0	0	0.0164560294892048	0	0	0	0.00511257133506406	0.0134936449464887	0.00827841981522567	0.038921119197112
X9130023H24Rik	0.207975567794746	0	0.0682584186228369	0	0	0	0	0.129447505260356	0.0467164183516786	0.0627708936229703	0.0325211381754161	0.022619266667882	0.027666877392989
X9130024F11Rik	0.120737950352555	0	0	0	0	0	0	0	0.0128528757024097	0.00422172020808394	0.00742395705510726	0	0.0524266406621188
X9130204K15Rik	0.0982646463455378	0	0.00740470880242164	0	0	0.00920037684743567	0	0.0144371392519829	0.0273837639261609	0.003217036088476	0.00390384059838069	0.0142255604870832	0.00775749451545138
X9130204L05Rik	0	0	0	0	0	0	0	0	0	0	0	0	0
X9130213A22Rik	0	0	0.0162871834556187	0	0.0857309420115908	0	0.0214251587068631	0.0293397851239935	0.00760021645416461	0.00945905078460519	0.0118562399610053	0	0
X9130221F21Rik	0	0.0278032641032057	0.0315000315000315	0	0.0915315051440706	0.0159825591553431	0	0	0.0215080460074258	0.014708214463386	0.00903614169586585	0.0181045600407084	0
X9130221H12Rik	0	0	0.0284042767330688	0.0361522443313281	0	0.0106640731640732	0	0.00921879897486955	0.0552246937859685	0.0641290783213327	0.038735044969022	0.0209766739385803	0.013857260103329
X9130227L01Rik	0	0	0	0	0	0.0121576408341114	0	0	0	0.00387998939938004	0.00117674525442174	0	0
X9130230L23Rik	0	0.0648970143561825	0.161051867798885	0.369638718694024	0.113750113750114	0.128677101155733	0.0448842227619713	0.0579109928619977	0.193675394209265	0.10479125664563	0.0774518116935182	0.0215451639254939	0.130107907231403
X9130401M01Rik	0.0532175319837367	0.30260835625185	0.131295438351624	0.136106271777003	0	0.0473371644733956	0	0.0671936850892337	0.266364612706766	0.228866168661814	0.183611446371219	0.119410296863885	0.0635433047295961
X9130409I23Rik	0	0	0	0	0	0	0	0	0	0.00692871361226117	0.00294577534574565	0	0.0477764825042521
X9130409J20Rik	0	0	0	0	0	0	0	0	0	0.00122198944584528	0.00220844154696914	0	0.0619916683197778
X9130410C08Rik	0	0	0.0111531212009681	0	0	0.00262173227289506	0	0	0	0	0	0	0
X9230009I02Rik	0	0	0.0302334932685127	0.0102324819908317	0	0	0	0.0157308390514933	0	0.00100033804237214	0.00302689089874445	0	0.00711770115335229
X9230019H11Rik	0	0.0235046351140445	0	0	0	0	0	0.0168814835447739	0	0.000724489618055702	0.00610493353062792	0	0
X9230020A06Rik	0	0	0	0	0	0	0	0	0	0.00018821407242741	0.00299710599445176	0	0
X9230102O04Rik	0	0	0	0	0	0	0	0	0	0.00312265346399454	0	0.02124675986912	0
X9230104L09Rik	0	0	0	0	0	0	0	0	0	0	0.00270138267570873	0	0
X9230104M06Rik	0	0	0	0	0	0	0	0	0.00613904067666962	0.00450166612873181	0	0	0
X9230105E05Rik	0	0	0.00527316441805753	0.0156909017875075	0.111901884427734	0.0677437831882594	0.129357916004405	0.0277364714117145	0.0445953639699173	0.196628403035807	0.107580450015787	0	0.0227205367476599
X9230109A22Rik	0	0	0.0286728938718352	0	0	0	0	0	0.0160622186100077	0.0118074659567718	0.0148339122386444	0	0
X9230110C19Rik	0.179830240253201	0	0	0.0185437930215998	1.21619232264186	0.043912330584374	0.127233747479181	0.0918149230521623	0.0122273454799783	0.0613587408500389	0.0282464983965689	0.00924462194118572	0.00558023258409411
X9230110F15Rik	0	0	0	0	0	0	0	0	0	0.00179621535626903	0	0	0
X9230111E07Rik	0	0	0	0	0	0	0	0	0.00481924691556149	0.00873671030854881	0.00121508336443947	0	0
X9230112D13Rik	0	0	0	0	0	0	0	0	0	0.00155772265135095	0.00197726305665887	0	0.00346704092217741
X9230113P08Rik	0	0	0	0	0	0	0	0	0	0.0045220327107906	0.00630597913485305	0	0
X9230114J08Rik	0	0	0	0	0	0	0	0	0	0.00254001209818521	0	0	0
X9230114K14Rik	0.0959287824718929	0	0.0775513487513156	0.135729551754893	0.2765151610068	0.0793611197935224	0.270369217052054	0.0985120843589731	0.109363246375711	0.166593487663178	0.174074543213417	0.0731252280133478	0.19434114405382
X9230116N13Rik	0	0	0	0	0	0.0193526527242106	0	0.0190991321354358	0.00230652680195677	0.0051669995733023	0.00384796056658476	0	0.017106259343304
X9230117E06Rik	0	0	0	0	0	0	0	0	0	0.000804102354400994	0.00225025135307614	0	0
X9330020H09Rik	0	0.0521517825479275	0	0.106148097826087	0.145315043013253	0.091108236737774	0	0.0478388689803827	0.0335265875794444	0.0424564027353231	0.0430662457428478	0.0590106429079191	0.047546007330541
X9330102E08Rik	0	0	0.00352274796887159	0.0102324819908317	0	0.00908483051340194	0	0	0.032920489727242	0.0532956735601332	0.0718477887690861	0.0209939468871378	0.0200681295982952
X9330104G04Rik	0	0	0	0	0	0.00582392187558239	0	0.00411256078878916	0.027446730671452	0.0500058235149363	0.0293292546515213	0	0.0179347781232456
X9330111N05Rik	0.0982646463455378	0	0	0	0.0730545571432746	0.00952860104890841	0	0	0.013355646166195	0.00735471625152035	0	0.0209323257907186	0
X9330118I20Rik	0	0	0	0	0	0	0	0	0	0.000797368970466374	0.00110497188730524	0.00418381157786178	0
X9330136K24Rik	0.116144018583043	0	0.0232943349327924	0	0	0.0445341552564173	0.0280734063429054	0.0562775330859727	0.120209807730902	0.079373504569681	0.08227919854472	0.0238946636165721	0.0609357375548711
X9330151L19Rik	0	0	0	0	0.222162978761219	0.0244433750399078	0.0634340666311436	0.49906946902032	0.283589187823382	0.344969324739101	0.250996985222856	0.200229857245417	0.321921441096448
X9330154J02Rik	0	0.0373432517009851	0	0	0	0.0121067720440105	0	0	0.0161140472368863	0.0102718012988887	0.0060188299990698	0	0
X9330158H04Rik	0	0	0.0340630893493481	0.0360189027201475	0.145315043013253	0.0474648430392622	0	0.0676655021991408	0.0762984121461734	0.036715430504235	0.078396100755801	0.0141347756552403	0.0987618154259234
X9330159F19Rik	0	0.0235046351140445	0.0486131676717023	0	0	0.0233277247681866	0	0.471069998680564	1.0256281389868	1.16562730464483	1.0654559368798	0.394092533608368	0.273140338482287
X9330159M07Rik	0	0.0982298972515275	0.0602386290812102	0.0251610305958132	0	0.0681867837216591	0.022757788853235	0.0273723402015817	0.0636248222386127	0.0876168750933162	0.0747894772064917	0.0119721766614388	0.154378207780487
X9330161L09Rik	0	0	0	0	0	0.00711520947176685	0	0	0.0096747863076209	0.0265268389551332	0.0257951213175904	0	0
X9330162012Rik	0	0	0.0121850618452814	0	0	0	0.0299661382637619	0.0234942689385819	0.0136528798665387	0.116424723894791	0.131799347825509	0.0170530459616331	0.00420232338055064
X9330162B11Rik	0	0	0	0	0	0	0	0	0	0.00118673691466145	0.00409178801408332	0	0
X9330175E14Rik	0	0.0762113798832442	0.029028671618958	0.112087517934003	0	0.0277450202532662	0	0.0204735113709882	0.00815405953931194	0.0154120853346222	0.0279917112889922	0.0174026636984591	0.0162447366581577
X9330175M20Rik	0	0	0	0	0	0	0	0.0528899043750529	0.0176156191741649	0.00324946520339318	0.00143698476911104	0.00499293499697927	0
X9330178D15Rik	0	0	0	0	0	0	0	0	0.00706396776005114	0.0296883942795267	0.0526061792946537	0	0
X9330179D12Rik	0	0	0	0	0	0	0	0	0.0510069280188769	0.00292318405480106	0.0251164048365062	0.00427503890285402	0.00415178252630984
X9330182L06Rik	0	0	0.0168177458887286	0.0409299279633268	0.114056312018383	0.0288751013621556	0	0.0967003121772647	0.46194732040885	0.43671957770439	0.667211342639146	0.754690662601687	0.451331058700448
X9330185C12Rik	0	0	0	0	0	0	0	0	0	0.00462491019362263	0.0042066951917596	0.0087658168207259	0.0261532563028013
X9330198N18Rik	0	0	0	0	0.177262447155661	0	0	0.0358731525326446	0.133099945043314	0.00291143955328005	0.0113408872104855	0.368095988878577	0.38483205131806
X9430007A20Rik	0	0	0	0	0	0	0	0	0	0.00327812706377421	0.0160910467773664	0	0
X9430015G10Rik	0	0.153916718741823	0.0286845627456634	0.0390234765234765	0.0915315051440706	0.0984005342735358	0	0.00445088338908065	0.122461677443292	0.144308192056368	0.179839076983532	0.0443588537809386	0.0280536108807656
X9430016H08Rik	0.209222529081932	0.144141824819171	0.206252348056573	0.40994530374139	0.0730545571432746	0.175759168688764	0.201586354218921	0.713219299725145	0.707453933254859	0.59609576430545	0.492029236374704	0.408632003805906	0.458050984562497
X9430018G01Rik	0	0	0	0	0	0	0	0	0.0104847080533043	0.00315710013015325	0.0070134217970767	0	0
X9430021M05Rik	0.0761904761904762	0	0	0	0	0.014137712631198	0	0.0239501453773824	0.0145684674263637	0.0045852217875128	0.0327352578137819	0	0.0164692551944031
X9430024E24Rik	0	0	0.0166738364163257	0	0	0	0	0	0	0.00103774189474263	0	0	0
X9430037G07Rik	0	0	0	0	0.0410017548751086	0.0162761260363958	0	0.0157308390514933	0.050098114973601	0.0320140179054588	0.0154396797240614	0.0184763025556627	0.00737408745667724
X9430038I01Rik	0.190628693430935	0.0794147628123794	0.0302819661203874	0.170255542364483	0	0.136693138403608	0.0251806713166973	0.0989168996434721	0.0949816883749384	0.0375861621933809	0.0610735053711938	0	0.0779319353361907
X9430041J12Rik	0	0	0	0	0.111901884427734	0.00663651036357458	0	0.213948296313493	0.0619987405015828	0.0113612773390774	0.0388797079151785	0	0.0664487539669328
X9430060I03Rik	0.102011670135063	0.0567028430805521	0.0551852225365593	0.0228302162478083	0	0	0.0280734063429054	0	0.0357148372480888	0.0242207158659032	0.0499253900934417	0.00722259462572963	0
X9430065F17Rik	0	0	0	0.084277238403452	0.187209824771604	0	0	0	0.0348434286389413	0.04522173211997	0.00562740759982093	0.0365211118081698	0.0367597683866927
X9430073C21Rik	0	0	0.0126547357817716	0	0	0	0.0240033220597731	0	0	0.00748628986095614	0.00400660778995783	0	0
X9430076C15Rik	0	1.96925225113674	0.0333487703586673	1.20852331491679	0.590483370386953	0.0359444498158305	0	0.111079909404224	0.835380066476289	0.0639158777223229	0.0534529594080643	0.970491442731367	0.415554040695357
X9430091E24Rik	0	0	0	0.0220505221563647	0.137741046831956	0.0794201034719427	0	0.0125966795152798	0.0108965460128448	0.00999917910796106	0.013389284166102	0	0.0182989670887934
X9430093N23Rik	0	0	0	0	0	0	0	0	0	0.000560366300243143	0	0	0
X9430097D07Rik	0	0	0	0	0	0	0	0	0	0.00731470080339189	0.00328579882765338	0	0
X9530002B09Rik	0	0	0	0	0	0	0	0	0.00373823111389568	0.00386310804959105	0.00257755342752745	0	0
X9530003J23Rik	0	0	0	0	0	0	0	0	0	0.00122452898199358	0	0.0175083821379485	0
X9530026F06Rik	0.0633906384705107	0	0	0	0	0.0160031586467699	0.0144187166477061	0.00927058998034635	0.0451226558092252	0.018340059338357	0.0280777839602212	0	0.0137597763210761
X9530026P05Rik	0	0	0	0.0228302162478083	0.103211956072991	0.130966547044901	0.0488746609320398	0.104530646355361	0.0303465921858271	0.0212882279323742	0.0445422097533538	0.0230242576867463	0.0349367845679286
X9530027J09Rik	0	0	0	0	0	0	0	0	0.0113614157232904	0.00283050650661568	0	0.00958933665763671	0.0554206053248611
X9530034A14Rik	0	0	0	0	0	0	0	0.0280879151744962	0	0.00231869363500165	0.00281910586982948	0	0
X9530034E10Rik	0	0	0	0	0	0	0	0	0	0	0.0013413967374012	0	0
X9530036M11Rik	0	0	0	0	0	0	0	0	0.00805540183163727	0.0116541697441822	0.00528523214251396	0	0
X9530036O11Rik	0	0	0.0265187978498559	0	0	0.0231790535528853	0	0	0.0056517738657455	0.00744997872475399	0.0230586234825553	0.00365957867270741	0.0143719459614832
X9530046B11Rik	0	0.0556947925368978	0	0	0	0.00598246420093422	0	0	0	0.00972676819157297	0.00886411334144924	0	0
X9530051G07Rik	0	0	0.023858775138202	0	0	0.0368625027577043	0	0	0.0120299347938125	0.0204217510743406	0.0356190768241292	0.0169537501695375	0
X9530052C20Rik	0	0	0.0153355416513311	0	0	0	0	0	0.00560420001165673	0.00141065149232799	0.00306946946062055	0	0
X9530052E02Rik	0	0	0	0	0	0	0	0.0538566386251109	0.0200041186451107	0.0206690411159359	0.0152696873390362	0.0161253910407327	0.00833994969342345
X9530059O14Rik	0	0	0.0137198489170237	0.015628125625125	0	0.0484238334250336	0	0.0080949964017741	0.0150665301252302	0.0117279485113945	0.0361493866536842	0.0240521032018284	0.163308028482632
X9530062K07Rik	0	0	0	0.136106271777003	0.131068470168816	0.0591812558969365	0	0	0	0.0551563098644781	0.0297626250723306	0.00837293031628744	0.00447411278343504
X9530068E07Rik	1.70939219951175	1.05739486554891	2.40681176398872	1.20665234501183	2.8788518671959	1.37182253403592	2.63295214027198	1.1089924851408	1.896921768774	1.06627259601735	1.44379108454918	1.75616126134239	1.39025837328319
X9530077C05Rik	0.209222529081932	0	0	0.0180260729118597	1.00674732580554	0	0	0.0138320621668202	0.0960245454576195	0.12628485591743	0.12405799059009	0.0725218190966712	0.0196523540218812
X9530080O11Rik	0	0	0	0	0	0	0	0.0127475088180892	0.0270712350936251	0.0125514309373509	0.0101122211905144	0	0
X9530082P21Rik	0	0	0	0	0.0940309173656298	0.096054342398213	0.0383691573365666	0.0326442139762938	0.0218148236307554	0.064479925337134	0.0888022836327737	0.0380076395355466	0.0262422045756723
X9630001P10Rik	0	0	0.00862057075074826	0	0	0.00569964251842124	0	0.0361878293092467	0.163515130586828	0.0103928797054042	0.0382847835705742	0.00502460801776701	0.00394303108685709
X9630013D21Rik	0	0	0	0	0	0.00569964251842124	0	0.0179560937595392	0.0203757227943886	0.00234875016147552	0	0	0
X9630013K17Rik	0	0	0	0	0	0	0	0	0	0.00139193064648597	0.00166608353742857	0	0
X9630028B13Rik	0	0	0.0129137612684451	0	0.137741046831956	0.0070373372967617	0	0.047123235869981	0.0421697418503955	0.0249376024961526	0.0463068844387307	0.0101862038055657	0.0150545200545021
X9630028H03Rik	0.340622658219225	0	0	0	0.089937763067957	0.0168554476806904	0	0	0.0431391670865717	0.00541125366600741	0.00363981752016484	0.00682591526991375	0
X9630041A04Rik	0	0	0	0	0	0.00632463064157053	0	0	0	0.00127288705375547	0	0	0
X9830004L10Rik	0	0	0	0	0	0.056731667452208	0	0.026657032582895	0	0.0170227603285222	0.0186519553951988	0	0.0425256855140505
X9830107B12Rik	0	0	0.0196543198229539	0	0	0	0	0	0.0247962369230846	0.00411258846331077	0.00442657073050612	0	0.00423415916373663
X9830132P13Rik	0	0	0.0192010076688825	0	0	0.0176593298085347	0.0488746609320398	0	0.0141179003373038	0.0129810807143614	0.0358956957697952	0.0602539577124969	0.00236158736456296
X9830144P21Rik	0	0	0	0	0	0	0	0	0.00536269803773516	0.00877994390129528	0.00345705439605951	0	0.00641254190596135
X9830147E19Rik	0	0	0.037594251601875	0	0	0.0551477886852797	0.113837737380025	0	0.0401111859043859	0.0487368053214625	0.0360661582196684	0	0
X9930012K11Rik	0	0.0278032641032057	0.00360836274148968	0	0	0.0510109355420839	0.169747687519342	0	0	0.0204522420140651	0.0248440289428481	0.0387083646755552	0.0172190601472861
X9930014A18Rik	0	0	0.0121343171837706	0	0.154580601894271	0.0305834827315219	0	0.0199114934117846	0.0365832503653789	0.101450680144071	0.0551587015443043	0	0.0558306058672299
X9930022D16Rik	0	0	0	0	0	0.00363812051783552	0	0	0.00351891628638911	0.0103182433240318	0.00755900112763771	0.00537367169552776	0
X9930038B18Rik	0	0	0	0	0	0.0163784067085954	0	0	0	0.00320150759548942	0	0	0.00641254190596135
X9930104L06Rik	0.275759022725094	0.258880739310738	0.172559212652496	0.027574324388168	0	0.0705917033695939	0.132643971960807	0.136593333193433	0.207084259336011	0.274249239267115	0.278454989188707	0.0692059410033969	0.156050197488221
X9930111H07Rik	0	0.0567080875803799	0.0400942478964847	0	0.0962612144314813	0.0703676664491477	0.045735611576598	0.178968483683651	0.230070526866599	0.157253860082669	0.121227058946841	0.0444294342949858	0.126732179967182
X9930111J21Rik1	0	0	0	0	0	0	0	0	0	0	0.00399014275134707	0	0
X9930111J21Rik2	1.18437826664117	2.39298759972678	1.09225912298857	0.983437829589216	1.24277730642234	1.83509290849146	1.22948754961796	1.41696498096551	1.75732544625036	1.25443160616056	1.34804859629598	0.479371148692883	1.21558481067899
A130010J15Rik	0.116144018583043	0.414601080640762	0.145129162418154	0.157427908949258	0	0.22341963045493	0.0410571392206534	0.0498522829337776	0.262042130051197	0.177089611558167	0.66218801848371	0.112706167375372	0.0807923411865344
A130023I24Rik	0	0	0	0	0	0.011421783625731	0.0445960710861373	0	0	0.00455086417092215	0.00436805588315975	0	0
A130030D18Rik	0	0	0	0	0	0	0	0	0	0.00183345273930405	0	0	0
A130051J06Rik	0	0	0	0	0	0.0200895439719967	0	0	0	0.0118914369845601	0.00224852092293689	0	0.00694502319637748
A130057D12Rik	0	0	0	0	0	0	0	0.0311793106566207	0	0.0044702502588792	0.00725210680793	0	0
A1bg	0	0	0	0	0	0	0	0	0	0.000376032373379089	0.00239004136683598	0	0
A1cf	0	0	0	0	0	0.00384947031288495	0.0297107068474266	0.0262974504621777	0.00340639018360102	0.00320081689964313	0.0128853612775246	0	0.021731314980227
A230001M10Rik	0	0.076079183213889	0	0	0	0	0	0.0107467601204927	0.0183019529490941	0.010859517552	0.00677136699935779	0.420392576274309	0.00545066062006715
A230004M16Rik	0	0	0.0229203769026778	0	0	0.0303332798410117	0	0.0103393798026419	0.0116598767317832	0.00398264368472676	0.00814104256565551	0	0.0226003001319858
A230005M16Rik	0	0	0	0	0	0	0.0979296836736329	0.0301422937258236	0	0.00185235609679808	0	0	0.00807783152228351
A230009B12Rik	0	0.0509107941065665	0.012191434785577	0	0	0	0	0	0.00663456862366537	0.00926221865580164	0.00208974886234072	0.812611517372768	0.120650316770578
A230020J21Rik	0	0	0	0	0	0.00457352768996605	0	0	0.010764413280272	0.00137096369965763	0.00284378195699974	0	0
A230028O05Rik	0	0.0687994496044032	0.0362700315114386	0	0	0.0120396054862074	0.0404305040066629	0	0.00664450061262296	0.00970688466329409	0.0161354596260076	0	0
A230050P20Rik	0.844458907363662	0.429034921271834	0.287543271586649	0.502209674052363	0.494447327525718	0.698592092822994	0.382917056370245	0.802174639886323	0.749818198693135	1.28854261564382	1.42576227580541	0.228327079206969	0.503419981559638
A230052G05Rik	0	0	0	0	0	0	0	0	0.0134333112748085	0.00300202312003907	0.00464746108083891	0.00411085326925883	0.0117205971800711
A230056P14Rik	0	0	0.00673310898614191	0	0.134799956864014	0.00322337748071131	0	0.0645677033779842	0.0678302376827788	0.0363633401702042	0.0540936339188279	0.0462717508793986	0.0645297746014068
A230059L01Rik	0.190628693430935	0.037957290456778	0.0903891789698569	0.134295435211708	0.0940309173656298	0.300822996628137	0.694284052801201	0.245887382347716	0.222239598717569	0.314308235986009	0.231297758686	0.137745446687511	0.170892441575853
A230065H16Rik	0	0	0	0	0	0.013605886450714	0	0	0	0.00260701387476906	0.138101977058802	0	0
A230072C01Rik	0	0	0	0	0	0.00457352768996605	0.0726950225718045	0.0106910593877658	0.0152869815993558	0.00906583904495911	0.00610630474331213	0.0169853979978849	0.0282459410778738
A230072E10Rik	0	0	0	0	0	0	0	0.0814708283558833	0	0.0876119091796877	0.0449339391578864	0	0.0163216440269382
A230072I06Rik	0	0	0	0	0	0.0155565511748307	0.0304064121041845	0	0	0.00183861927395657	0	0	0.00236158736456296
A230077H06Rik	0.298364960019095	0	0	0.0249202551834131	0	0.0283469654144022	0.0313269468131097	0.0458966415753613	0.165949306378874	0.142580780075975	0.109320251883649	0.0695614729261216	0.044679373196423
A230083G16Rik	0	0.0670636836740168	0.00529292082425597	0	0	0	0.102278247973612	0	0.0144892048179504	0.013303373833009	0.0193079416290882	0	0
A230087F16Rik	0	0	0.0215037115406119	0.0325928243637881	0	0	0	0.0285960495983128	0.0144973338478201	0.107085041307199	0.0946680695726895	0	0.00329323490512849
A230103J11Rik	0	0	0	0	0	0	0	0	0.00645134652504671	0.0201527030658027	0.0361000410285792	0.0159693388693708	0
A230107N01Rik	0	0	0	0	0	0.0230865839243499	0	0.0816399973467415	0.0189510303850212	0.0134359192314424	0.0198282613961839	0.00434730630033365	0.014062007829726
A230108P19Rik	0	0	0	0	0	0	0	0	0	0.00560844559007527	0.00149273872176186	0	0
A2m	0.979876161871023	0	0	0	1.14500907035945	0.00697233377956269	0.110868022705771	1.32140293111235	0.021693550960716	0.00901144766173985	0.0131653161975598	0	0.0205744922218601
A330008L17Rik	0	0.0250411927620936	0.00529292082425597	0.0694444444444444	0	0.0132170463417149	0	0	0.0677232949795199	0.0849012279975028	0.0645570344957084	0.05604512733403	0.024963667637939
A330009N23Rik	0	0	0	0	0	0.0618219360758562	0	0	0.0146004158198426	0.00717786296248392	0.00712613828885925	0	0
A330015K06Rik	0	0	0	0	0	0.0182173254051533	0	0.024952098098215	0.00420580518878598	0.00640489755071605	0	0.125738940633994	0.0128890160823349
A330017A19Rik	0	0	0.0670575722617697	0	0	0.0287684588952527	0.0267576426516824	0.0420620076348021	0.0257308832702947	0.0516249741476019	0.140223642362807	0.052534514662479	0.0290370058639568
A330023F24Rik	0	0	0.00659481337052024	0.152265976151477	0	0.0463209200007432	0.084386703370178	0.148792269787732	0.0418752478007742	0.452702886158803	0.40865835814293	0.0269691491335499	0.0204963086179935
A330032B11Rik	0.102011670135063	0.0635647088736334	0.0479916076793348	0.0691984056687334	0.0688496598826802	0.0382573483071541	0.121007910144453	0.044659405047406	0.0865124705605077	0.120790144599107	0.0886213384629225	0.0373988133283729	0.171139547545768
A330033J07Rik	0	0.0240920896032997	0	0.0180260729118597	0	0.0664502465331397	0	0.0793240840256218	0.0040252657883	0.0256782151880905	0.106268361173372	0.0161648817943019	0.0374169818366096
A330035P11Rik	0	0	0	0	0	0.0215398400882272	0	0	0.0197743773471032	0.016383828878297	0.00865796311274848	0	0.0268014395548924
A330040F15Rik	0	0	0	0	0	0	0	0.0270963056896823	0	0.0126086182042045	0.0105756767129214	0.00978358705435761	0.00383356206920346
A330041J22Rik	0	0	0	0.030517578125	0	0.00585534944725501	0.0278140132561587	0.0569649953543579	0.0361556913150839	0.0288558459767974	0.0216931265042729	0	0
A330043C09Rik	0	0	0	0	0	0.0101349160018162	0	0	0.0171863819044112	0.000674182452648795	0	0	0
A330044P14Rik	0	0.0348645859481773	0.0277290734936836	0	0.198664971392244	0.0323965400671194	0	0.0959407101628509	0.144135842912945	0.130762127282995	0.108331557388111	0.0415423312168649	0.113122818769868
A330048O09Rik	0	0	0	0	0	0.00321561606058735	0	0.05089175070167	0.015843771193578	0.0105781149595143	0.00975116169514083	0	0.00415178252630984
A330069E16Rik	0	0.0194715423408688	0.0197385802354582	0.0490426867545512	0.0993324856961221	0.0838762164484694	0	0.0206013110674363	0.0808758399379575	0.0803093794833622	0.064535443408851	0.0469427974613056	0.0687047971738887
A330069K06Rik	0	0	0	0	0	0	0	0	0	0.000982870576248496	0.0111563611253523	0	0
A330070K13Rik	0	0	0	0	0	0	0	0	0	0.00173913236021808	0.00147675586272077	0	0
A330074K22Rik	0	0	0	0	0	0.00369071239606954	0	0.0195054966489557	0	0.012483643451078	0.0133725804866604	0.0546043180880284	0
A330087D11Rik	0	0	0	0.0102324819908317	0	0	0	0.0303339157445156	0	0.00255907936529091	0.0026480498172316	0	0
A330093E20Rik	0	0	0	0	0	0	0	0	0.00732027445172974	0.00878819743711917	0.00111525540017817	0	0
A330094K24Rik	0	0	0.0106002834515795	0	0	0	0	0	0	0.00235897292647148	0	0	0
A330102I10Rik	0	0	0.0341761607594255	0	0	0	0.0586063412061185	0.0136039984872354	0.0444830444384389	0.283186979139812	0.103978750477855	0.00836762315572356	0.149643437765027
A3galt2	0	0.042644286944878	0.0147812449651384	0.0286907822254866	0	0.0538869881381641	0	0	0.0250778995632005	0.0194449866460421	0.0134653861654924	0.00666060551564743	0.0514784614117453
A430005L14Rik	0.126781276941021	0.480640436742337	0.0340734666029252	0.0102324819908317	0	0.179216927575156	0.169046292046423	0.102850549164924	0.182918173647293	0.120690489072304	0.20217664013716	0.0529774233815967	0.0939041434541199
A430010J10Rik	0	0	0	0	0	0	0	0	0.0275123620694407	0.00803838191778358	0.00539009729257652	0.0179691290363156	0.0195889120232202
A430018G15Rik	0.217438573602957	0.0404050199196748	0.0289898771529002	0	1.05095891152935	0.0244178777934052	0	0	0.0074207232680249	0.0795739969079569	0.054956611747855	0.0450840040144365	0.0109412078863695
A430027H14Rik	0	0	0	0.0188616610333172	0	0	0	0	0.0422630437830463	0.00579864449131407	0.00769526718333995	0	0
A430033K04Rik	0	0.0462410639143985	0.021000021000021	0.0652673350041771	0	0.0173556558599945	0.0597161096148908	0.0740730347573501	0.118316538570497	0.129229702178578	0.128859985137084	0.0139043532841713	0.142162624678024
A430034D21Rik	0	0	0	0	0	0	0	0.025763700491829	0.0150273483798337	0.00686926912235776	0.00370882717055336	0	0
A430035B10Rik	0	0	0.0436090352204919	0	0	0.0861058807517572	0.180933155183765	0.0276110017727134	0.0950404550208007	0.0575802661630042	0.0390282871523505	0.142881226892898	0.115277881850054
A430046D13Rik	0	0.0762113798832442	0.0142656201407731	0	0	0.0283549444085962	0.113704742552461	0.00927058998034635	0.0290695091909628	0.0820016138807228	0.12052400745639	0.0565141049047844	0.0175553324903757
A430048G15Rik	0	0	0	0	0	0	0	0	0	0.000343361373939936	0	0	0
A430057M04Rik	0	0	0	0	0	0.0112152365882821	0	0	0.0147088521849329	0.0111070786889521	0.0141346285840819	0.00537367169552776	0
A430072P03Rik	0	0	0	0	0	0	0	0	0	0.00164907745734016	0.00240577308555795	0	0
A430073D23Rik	0.0567298637348673	0.197917138190852	0.152070209257014	0.0500688816283344	0.35529301474046	0.190449348921387	0.137453654588375	0.311570830609638	0.605173862590772	0.36822909498295	0.31868177393779	0.143232187987948	0.330142846464873
A430078I02Rik	0	0	0	0.0185437930215998	0	0	0	0	0	0.00884495438468292	0.00865546763229251	0	0.0176941043244391
A430089I19Rik	0	0	0	0	0	0	0	0	0	0	0	0	0
A430093F15Rik	0	0	0.0305659403138125	0.0818920335429769	0	0.188674898144073	0.103476821192053	0.0708301888935416	0.0280050923967015	0.012738538661457	0.0158527824850841	0.00600241897484686	0
A430105I19Rik	0	0	0	0.0361522443313281	0	0.0985258039702801	0.151958309675046	0.105554265447867	0.0278497217124549	0.00803551514140782	0.0178099163030741	0.0849684335116112	0.0280804524310365
A430105J06Rik	0	0	0	0	0	0	0	0	0	0.00435678574579631	0.00557947803257673	0	0.0112712124217778
A430108G06Rik	0	0	0	0	0.0688496598826802	0.00712396844936853	0	0	0	0.0112039902943909	0.0102119303161649	0	0
A4galt	0.369752945199857	0	0.013883277730806	0	0	0.111278801928226	0	0.0135537167679807	0.0146004158198426	0.00146215884969182	0.0078421427124891	0	0
A4gnt	0.298364960019095	0.0318054018294467	0	0	0	0	0.0264477498254448	0	0.00850292415561712	0.00419035036778027	0	0	0
A530006G24Rik	0	0	0	0	0	0	0	0	0	0.00381398328296	0.00136328637084443	0	0
A530010F05Rik	0	0	0	0	0	0	0	0	0.00437724497951887	0.000479589394743796	0	0	0
A530013C23Rik	0	0	0	0	0	0.0163437637533886	0	0	0.0208419748138339	0.0154370936739487	0.0160284514716452	0.0169063977929748	0.0089959141967693
A530016L24Rik	0	0	0	0	0	0.017155248133509	0	0	0	0.0034178117483882	0	0	0
A530020G20Rik	0	0	0	0	0	0.00208191762934538	0	0.0641449238198908	0	0.0114614429839034	0.0047027142642804	0	0.00415472184137272
A530032D15Rik	0	0	0	0	0	0.0150574474407239	0	0	0	0.000626928502550506	0.00131426492636962	0	0
A530040E14Rik	0	0	0.013883277730806	0	0	0.00606395777544922	0	0	0	0.00123004880852949	0	0	0
A530053G22Rik	0	0	0	0	0	0	0	0.0190880857894928	0.0128902025437526	0.00690358487099726	0.00691658784951538	0	0
A530053M12Rik	0	0	0	0	0	0	0	0.00505333032154846	0.00690284044981669	0.000809569248465701	0	0	0.0056792367105861
A530058N18Rik	0	0.115596011839546	0.00864294523916326	0.0102324819908317	0	0.00632463064157053	0.0313269468131097	0	0.00937245752145188	0.0302584687798098	0.159830911942508	0.0272288699690306	0.0524893506940977
A530064D06Rik	0	0	0	0	0	0.00737202170323189	0	0	0	0.0037282798001824	0.00320753387996487	0	0
A530072M11Rik	0	0	0.0574851656043006	0	0	0.00944958162669018	0	0	0.00613056133871842	0.00999904317818164	0.0179155102235341	0	0
A530076I17Rik	0	0	0	0	0	0	0	0	0	0.0264986821294844	0.00479736753864219	0	0
A530083I20Rik	0	0	0	0	0	0.0347186552733303	0	0	0.00565657571270026	0.0147725567623636	0.00757020911705554	0	0.00236158736456296
A530084C06Rik	0	0	0	0	0	0.093206568519876	0	0.0273659206716692	0	0.00340841738762245	0.00199289572531839	0.00686853284704121	0.00655947608152641
A530095I07Rik	0	0	0	0	0	0.00952860104890841	0	0	0	0.00535685697574558	0.00677435062365196	0.004229384920551	0
A530099J19Rik	0	0.0253377522373235	0.0126547357817716	0.0599118098159509	0	0.00814693153970488	0	0	0.0161400960335714	0.00664285853587659	0.00143698476911104	0	0.0124323440129532
A630001G21Rik	0	0.435929457600857	0.589836770645192	1.1727575521754	0.108690926481457	0.0047189755670321	0.0651822495697972	0	0	0.00665293528569776	0.00613016451974598	0	0
A630010A05Rik	0	0	0	0	0	0	0	0	0.00908635329263721	0.000466302204863345	0	0	0
A630012P03Rik	0	0	0	0	0	0	0	0	0.0201748050927335	0.00483461342071634	0.00233656433449507	0.0278828703634197	0.0136327997863408
A630014C17Rik	0	0	0	0	0	0.0143551636489855	0	0	0	0.0375929057363385	0.0359338579887649	0.00365957867270741	0.0327322870563094
A630023A22Rik	0	0.0411248468099456	0	0	0	0	0	0	0	0.000821419053355615	0.00270138267570873	0	0
A630023P12Rik	0	0	0	0	0	0	0	0	0	0	0	0	0
A630031M04Rik	0	0	0	0	0	0.00546634480828436	0	0	0	0.00703198439622207	0.00289273506943721	0.0100876109006723	0
A630033H20Rik	0	0	0.124208410644183	0.381987652196869	0	0.0776200605757998	0	0	0.00524441875844679	0.0205899708039678	0.0159104894822363	0	0.0180578780465647
A630035G10Rik	0	0	0	0.0557239657631954	0	0.0167255405694712	0	0	0.0177882327289019	0.00737325816726912	0.00465279426885765	0	0
A630050E04Rik	0	0	0	0	0	0	0	0	0	0	0.00142911857682656	0	0
A630052C17Rik	0	0	0	0	0.089937763067957	0.0215941714298276	0	0.0222244446666889	0.0312192800562239	0.0456931684584815	0.0160576651007114	0	0
A630072L19Rik	0	0	0	0	0	0	0.0506695987474475	0.0117911040836131	0.052700573669491	0.00607813822604345	0.00361788741423798	0	0
A630073D07Rik	0	0	0	0	0	0.0108578113256495	0.0363076565586151	0	0	0.0117101848724815	0.012813792975125	0	0.0115926744407884
A630075F10Rik	0	0	0	0	0	0	0	0	0.0115363213863936	0.00821400451953849	0.002833310666848	0	0
A630076J17Rik	0	0	0	0	0	0	0	0.0262765130016186	0	0.00190000009909967	0	0	0
A630091E08Rik	0	0	0	0	0	0	0	0	0	0.000206318887297483	0	0	0
A630095E13Rik	0	0	0	0	0	0	0	0.0125966795152798	0.020204108949433	0.0023225789808385	0.00395666658753333	0	0
A630095N17Rik	0	0	0	0.0102324819908317	0	0	0	0	0.00323036856567113	0.000402990187188942	0	0	0
A730004F24Rik	0	0	0	0	0	0	0	0.0211018544309674	0	0.00078486807589748	0	0	0.00555733390240433
A730011C13Rik	0	0	0	0	0	0.00477478303385894	0	0.0434826091304783	0.0106952443595955	0.0262879034122483	0.0334730172986411	0.0126288139017983	0.01187163439165
A730015C16Rik	0	0	0	0	0	0	0	0.0479699132703968	0	0.0011853233331917	0.0010386390338829	0	0
A730017C20Rik	0	0.0445501768642022	0.0417353471479636	0	0.386107301497186	0.0764962860741621	0.0865977639606982	0.120376749774184	1.0116103715932	1.57176110251055	1.66839300276798	0.0602903717151178	0.275242921884204
A730017L22Rik	0	0	0.0550200307573443	0.0678893085590974	0.103635534552087	0.00807118136267369	0	0.0578048551715714	0.0470174524075771	0.0309506484838887	0.044896661373879	0.0142409062912764	0.0231981623830621
A730018C14Rik	0	0	0	0	0	0	0	0	0	0	0.00122814877696032	0	0.00447411278343504
A730020E08Rik	0.30437551657443	0.206323276471247	0.192895193907187	0.0620532168387609	0.425641977869114	0.336825623321701	0.260358629279687	0.356950619266516	0.355378181913821	0.440048012092393	0.311158294187907	0.0550194896471392	0.146294291943655
A730020M07Rik	0	0	0	0	0	0.0110159334461365	0	0.110560626593853	0.00534547540252766	0.0398857299500472	0.0109349671964007	0	0
A730032A03Rik	0	0	0	0	0	0	0	0	0	0.00205293492727143	0.00655688426680065	0	0
A730035I17Rik	0	0	0	0	0.0940309173656298	0	0	0	0.00954670606949571	0.000376032373379089	0	0	0.0079465735963967
A730036I17Rik	0	0	0	0	0	0	0.0214251587068631	0	0	0.0225457979689977	0.00722797321073572	0	0.0536475414862775
A730045E13Rik	0	0	0	0	0	0	0	0	0	0.00123441802268923	0	0	0
A730046J19Rik	0	0	0	0	0	0	0	0	0.014811545303333	0.00942378726929504	0	0.0360615473916407	0.0034531006772221
A730049H05Rik	0	0	0.0121850618452814	0	0	0.0224014336917563	0.0737474004041357	0	0.00476407128003449	0.00467297912359256	0.00442195266484772	0	0
A730056A06Rik	0.156641604010025	0	0	0	0	0.0189946511062485	0.377779222191691	0.0647710927442373	0.0459235691079019	0.0631636428400868	0.0500748557887828	0.0167911629290029	0.014528835404693
A730060N03Rik	0	0	0	0	0	0	0	0	0	0.00312004665093383	0.0191654379905618	0	0
A730061H03Rik	0	0	0	0	0	0	0	0	0.00906438340891518	0.00182243970002643	0	0	0
A730071L15Rik	0	0	0	0.045421511627907	0	0	0.0973054795958402	0	0.0671770773083984	0.0183384276369379	0.0083406397735464	0	0.0232571120248572
A730081D07Rik	0	0	0	0	0	0.0262496126981339	0	0.0283870332811083	0.0155920970907484	0.0324405532411124	0.0379921928476764	0	0
A730082K24Rik	0	0	0.0503788290670902	0.0631092706340088	0	0.0597034053029796	0	0.074771818795775	0.0979256062523004	0.0868488793754252	0.114067667544967	0.0828737478215742	0.0231481226535067
A730085K08Rik	0	0	0	0	0	0	0	0	0.00651447124642681	0.00331627990682196	0	0	0
A730090N16Rik	0	0.0237721675462369	0	0.0866562603276155	0.185377428444313	0.00384947031288495	0	0.0344862072414138	0	0.00321112196282437	0.0142115766674273	0	0
A730098A19Rik	0	0	0	0	0	0	0	0	0	0.0275858768244607	0.0407625015921778	0	0.00333914344292402
A830005F24Rik	0	0	0	0	0	0	0	0	0	0.00508483030420807	0.00649097703217815	0.00380807311500381	0.00787371815868377
A830008E24Rik	0.158741533869931	0.15724725356957	0.0282995213970192	0.371996000033784	0.11108148938061	0.176656113044181	0.118896167976506	0.112795714710519	0.159958774279687	0.0944215117652471	0.0427502363824769	0.0706797108947575	0.240269040949231
A830009L08Rik	0	0	0	0	0	0.00652182986893731	0	0	0.00893663035415866	0.00788364786122905	0.0060559731667358	0.00325744040105606	0.00654849685803121
A830010M20Rik	0	0.0250411927620936	0.0420782460161748	0.0595043004939608	0.456766733795129	0.0597793553219583	0.202111390324254	0.193109380315418	0.202384020792486	1.4703697577495	0.594362875862113	0.405006666608831	0.193201329426586
A830011K09Rik	0	0.0167467159689985	0	0	0.268809517000772	0	0	0	0.0346121362237367	0.0266059917399346	0.0183276118804683	0.0547081023687247	0
A830012C17Rik	0	0	0.0126410104718131	0	0	0	0	0	0.00288841197997753	0.00311285895752474	0.00260557530581637	0	0
A830018L16Rik	0.23591042544535	0	0.0118868043396345	0.0427379649890591	0.0733848005401121	0.0181707770707848	0	0	0.0899236355618769	0.0880529803541527	0.26987405114195	0.0685741876175393	0.0508703599987786
A830019L24Rik	0	0	0	0	0	0	0	0	0	0.00265134693113857	0	0	0
A830019P07Rik	0.563342562472457	0	0	0	0	0	0	0.0501340851792911	0	0.0104817759925674	0.0164343141779209	0	0
A830029E22Rik	0.100973383416132	0.308791862143446	0.152644311377451	0.0873340652759756	0	0.00915187723305804	0.0641617467508753	0	0.00673865345531195	0.00636254442592177	0.0067855290680458	0.00570662253545239	0.0279300177523849
A830031A19Rik	0	0	0	0	0	0	0	0	0	0.00046245843365791	0	0	0
A830035A12Rik	0.0982646463455378	0	0	0	0	0	0	0	0.0215728661196754	0.00115790822235683	0	0	0
A830036E02Rik	0.159261028826246	0	0.0356162039941986	0.0234468787515006	0	0.0578923353057492	0.00744772442228002	0.04860046378395	0.043377879401296	0.0270227787144017	0.0449957845206114	0	0
A830052D11Rik	0	0	0.09215229408046	0	0	0	0	0	0	0.0126080350155665	0.00309305861257268	0.00980296049406921	0.0651826183029563
A830080D01Rik	0.265731292517007	0.100365329800474	0.184176851108952	0.052930216802168	0.164916305684183	0.450700359151093	0.479730756479799	0.0777799632608966	0.236247634871497	0.207184659987559	0.147755598484668	0.0489514091832749	0.03329417811287
A830082K12Rik	0	0.0318054018294467	0.0153963165852202	0	0.0410017548751086	0.0492054220262066	0.104039182517396	0.116948208296997	0.0921853274193628	0.0485545704656519	0.140859992440653	0.0076190766441015	0.0207033963332835
A930001A20Rik	0	0	0	0	0	0	0	0	0	0.000768631384564537	0	0	0.00600669867035718
A930001C03Rik	0	0	0	0	0	0	0	0	0	0.000466764682759447	0	0	0.00322093556582819
A930002H24Rik	0	0	0	0	0	0	0	0	0.00549776186114633	0.000466530299860018	0	0	0
A930002I21Rik	0	0	0	0	0	0	0	0.0258444011981464	0.00663456862366537	0.00290498803571019	0	0	0.00762643872766597
A930003A15Rik	0	0	0.0235138777879958	0	0	0.00322337748071131	0	0	0.102174139557237	0.0305202656323386	0	0.355676045512844	0.037020383627156
A930003O13Rik	0	0	0.0126547357817716	0.0457674282366725	0.0993324856961221	0	0	0	0.0937199613827305	0.0201381170057227	0.0229720137039151	0	0.0163537941060312
A930004D18Rik	0	0	0.00263658220902876	0.026672925913281	0	0.0892545436995889	0	0.0493322874888386	0.0286383212674581	0.0194552139060124	0.0186226521777943	0.00447907265279796	0.0113037777225149
A930005H10Rik	0	0.0390731840737702	0.0365462612480698	0.0661158868549233	0.596516344547841	0.0333863007408809	0.0797893560998963	0.281955256109573	0.129322418608612	0.133503581751709	0.146668897067145	0.0970989695834531	0.121534032163688
A930006I01Rik	0	0	0	0	0	0	0	0	0.00240266676789903	0.00195783991766275	0.00430646990284888	0	0
A930006K02Rik	0	0	0.00395823116149148	0	0.23735528808539	0.0348345317506429	0	0	0.0233401914595905	0.0231094098971701	0.0194066919762036	0	0.0122346308567178
A930006L05Rik	0	0	0.0196875196875197	0	0	0.0123371439096654	0	0	0.00490625616348431	0.00909551756307716	0.00329658220038566	0.01445400014454	0
A930007I19Rik	0	0.0167467159689985	0	0.324098836275397	0	0	0	0	0.0308719701933617	0.0262954439342686	0.00725936981520638	0	0.00447411278343504
A930009A15Rik	0	0	0	0	0.0730545571432746	0	0	0	0.770305012682427	0.00211821352300589	0.00234970797829246	0	0.584720669400021
A930011G23Rik	0	0	0	0.0193714356558393	0	0.00553077767158685	0	0.0190286422610279	0.029883244157699	0.148931678599917	0.112794600792825	0.0061098365313236	0.0398255161897906
A930012L18Rik	0	0	0	0	0	0.0147879992428544	0	0.0600706930378671	0.00631369332749948	0.0231891827096806	0.0225877448150964	0	0
A930012O16Rik	0	0	0	0	0	0.00320374812901109	0.0541055274206813	0	0	0.0180375040339567	0.00826493189848248	0.00715648001374044	0.00787371815868377
A930014E10Rik	0	0	0	0	0	0	0	0	0	0.00506145905412449	0.0015342515522023	0	0
A930015D03Rik	0	0	0	0.0680531358885017	0	0	0	0	0.0430271820844779	0.0118122084131497	0.00718813573328382	0.00995574670589231	0.0139256422083934
A930016O22Rik	0	0	0	0	0	0	0	0	0.00884756094863549	0.00705415893881406	0.0151049576810809	0	0
A930017K11Rik	0	0	0	0	0	0	0	0.0235653697465427	0	0.0156689696353154	0.00871268357624295	0.137329896667324	0.0383150740870905
A930018M24Rik	0	0	0	0	0	0	0	0	0.00601426342714381	0.00137157314876101	0	0	0
A930018P22Rik	0	0	0	0	0	0	0	0	0.00203198218032907	0.00156199724173178	0	0	0.0107679717448421
A930019D19Rik	0	0	0	0	0	0	0	0	0	0.00086610065564817	0	0.0168527491046977	0
A930024E05Rik	0	0.0558365997744201	0.0872716967465648	0.0193044230294045	0	0.00689578793743826	0	0	0.0389525479928518	0.110139798545147	0.0174164346344609	0.00482504390789956	0.0524663255470051
A930024N18Rik	0	0	0	0	0	0	0	0	0	0.0037314587414619	0.0106061543391485	0.0128919141914191	0.0150365243042261
A930029G22Rik	0	0	0	0	0	0.0174392587127476	0	0	0.0567060595782279	0.024196047421157	0.00493633592217957	0	0
A930031H19Rik	0	0	0	0	0	0	0	0	0	0	0	0	0
A930033H14Rik	0	0.166153268393058	0.0531119985982224	0	0	0.116731432869916	0	0	0.0160645591742777	0.0225228141041596	0.024752772842835	0.00757825495523146	0.00982457243460765
A930038B10Rik	0	0	0	0.131302521008403	0	0.00736606842105741	0	0	0.0292680078227154	0.00844835315763407	0.00164898297326141	0	0
A930041C12Rik	0	0	0	0	0	0	0	0	0.0161400960335714	0.00205929286140121	0	0	0
A930104D05Rik	0	0	0	0	0	0	0	0	0	0.000283795906471086	0.00794175479235539	0	0.0171873842511456
AA415398	0	0.101821588213133	0	0	0.0733848005401121	0.0330424688366127	0	0.0356792436000357	0.0571551743835283	0.0599730702836852	0.0580115659015969	0.0280272555249055	0.0268267793060468
AA465934	0.116144018583043	0.048490491014712	0	0	0	0	0.0973052440305403	0.283551827347994	0.0360102163525902	0.045592280454513	0.0857423623790429	0.0147468098406322	0.047408579348552
AA467197	0	0	0	0	0	0.00416383525869076	0	0.0290266493667836	0.0190655459925816	0.0510176408882534	0.00249406937483048	0.01445400014454	0.00420232338055064
AA543186	0	0	0	0	0	0.0455928347485139	0.0251806713166973	0.0183913161143251	0.00663456862366537	0.01197237458214	0.00318088147800901	0.00508460141173958	0.0367552066917618
AA545190	0	0	0	0	0	0	0	0	0	0.00208017702606425	0	0	0.00609718919578074
AA645442	0	0	0	0	0	0	0	0	0	0.0245150782909021	0	0	0
AA672651	0	0	0	0	0	0	0	0.0241428678346986	0	0.00421465959090596	0	0	0
AA792892	0	0	0	0	0	0	0	0	0	0	0	0	0
AA986860	0	0	0.0401517301886306	0	0	0.115224760121553	0	0.0484636492127627	0.0129781473954156	0.0221717250543965	0.0179490143904739	0.0423815614752386	0.028258226072768
AB041806	0	0.0204903756705475	0.0570767194983048	0.0258606076159567	0	0.198785678440018	0.159935340650996	0.196164941735727	0.203526586053991	0.153017054569766	0.203459389666416	0.0806582234700949	0.156334493635127
AB124611	0	1.89205443751736	0.079740030699265	0.0193044230294045	0	0.00632232742575059	0	0	0	0.00839842245182204	0	0	0
AC087559.2	0	0	0	0	0	0	0	0	0	0.00253443808187411	0.00516355773543544	0	0
AC087559.3	0	0	0	0	0	0	0	0	0	0	0	0	0
AC102264.1	0	0	0	0	0	0	0	0	0	0	0	0	0
AC123873.2	0	0	0	0	0	0	0	0	0	0	0	0	0
AC123873.3	0	0	0	0	0	0	0	0	0	0	0	0	0
AC124606.1	0	0	0	0	0	0	0	0	0	0	0	0	0
AC124606.2	0	0	0	0	0	0	0	0	0	0	0	0	0
AC125149.3	0	0	0	0	0	0	0	0	0	0	0	0	0
AC125178.1	0	0	0	0	0	0	0	0	0	0	0	0	0
AC132444.1	0	0	0	0	0	0.0125623090529024	0	0.0344862072414138	0.0159211201453463	0.0370461714789679	0.0231963115255747	0	0.00690620135444421
AC132444.2	0	0	0	0	0	0	0	0	0	0	0	0	0
AC132444.4	0	0	0	0	0	0	0	0	0	0	0	0	0
AC132444.6	0	0.123941695033604	0.0593308018759669	0	0	0.052524694334341	0.0348737048777851	0.108559611487652	0.111200643567625	0.0699624821988838	0.0934448395959183	0.00917820634902424	0.0958745345865658
AC133095.2	0	0	0	0	0	0	0	0	0	0	0	0	0
AC133103.1	0	0	0	0	0	0	0	0	0	0	0	0	0
AC133103.5	0	0	0	0	0	0	0	0	0	0.000325509707513252	0	0	0
AC133103.6	0	0	0	0	0	0	0	0	0	0	0	0	0
AC133103.7	0	0	0	0	0	0	0	0	0	0	0	0	0
AC140325.2	0	0	0	0	0	0	0	0	0	0	0	0	0
AC140325.4	0	0	0	0	0	0	0	0	0	0	0	0	0
AC149090.1	0.817351652925942	1.76434452716783	1.31957739094756	0.903675964047086	1.08517305084174	0.33085333446565	0.209292744088941	0.698854758038576	1.14637121724415	0.689534216531946	1.49264940829833	0.313011296323098	1.23649858437395
AC163611.2	0	0	0	0	0	0	0	0	0	0	0	0	0
AC164084.1	0	0	0	0	0	0	0	0	0	0.00179570630017038	0.0113617750348482	0	0
AC164084.2	0	0	0	0	0	0	0	0	0	0	0	0	0
AC165294.2	0	0	0	0	0	0	0	0	0	0	0	0	0
AC165294.3	0	0	0	0	0	0	0	0	0	0	0	0	0
AC168977.1	0.112574580659687	0	0.011941610302266	0.0815215847840401	0	0.00368757670159539	0	0	0	0.0857141497859726	0.0225131949664983	0.0146624386099474	0.00850103032487538
AC234645.1	0	0	0	0	0	0	0	0	0	0	0	0	0
AF067061	0	0	0	0	0	0.017351079503902	0	0	0	0.000269774686879265	0.00394832975351436	0	0
AF067063	0	0	0	0	0	0	0	0	0	0	0.00779727095516569	0	0.00356245119441864
AF366264	0	0	0.0206989046372893	0	0	0.00369071239606954	0	0.0239501453773824	0.00780677988211272	0.00737825804242967	0.00402703979703374	0	0.00335185793485329
AF529169	0	0	0.0752399506079081	0.0514544853971053	0	0.0475830895379447	0	0.0575661280059413	0.1209780006974	1.78321830728189	0.149467244584913	0.0453528571285958	0.038548759460528
AI115009	0	0	0	0	0	0	0	0	0.00415592360414994	0.00477020058936758	0.0178757309943559	0	0
AI182371	0	0	0	0.0529704469798908	0	0.00423338481129264	0	0	0.0253613488009494	0.00551071473960636	0.00441715806589195	0.0097691071524518	0.00555733390240433
AI314180	2.45790269634897	0.313089190469104	0.677381138249567	0.750371737884672	0.868386986397931	0.522691912952118	0.68971812939405	0.910921435149191	0.439841299677009	0.785499097432816	0.880353212714372	0.41814148019354	0.42273162174324
AI413582	0.0814000814000814	0.702015494795187	0.520429768747001	0.286608739016674	0	0.152364846892439	0.0932371137070842	0.738469549872495	0.419173731197189	0.562688892521247	0.541486124536933	0.776179155332243	0.194824421274556
AI427809	0	0	0.00395823116149148	0	0.0993324856961221	0	0	0	0	0.00120954787925087	0.00398383984552678	0.0151993633493682	0
AI429214	0	0	0	0	0.113579573849439	0.0508626302083333	0	0.0486521818306488	0.0190261051828327	0.00969581915639573	0.0250607704339655	0	0.0276169316876232
AI464131	0	0	0.0170526406453558	0.0441010443127293	0	0.0167156405133175	0.0512578680827507	4.0903497256122	0.333771832324065	0.02581852134992	0.00478221485772355	0.144885431568215	0.121851940467987
AI467606	0	0.727730181182793	0.513230386262256	0.0712169553327256	0.220760298467924	0.480144149723497	0	0	0	0.00969457473803402	0.0290891373649168	0	0
AI480526	0	0	0.0210181809750614	0	0.145315043013253	0.0120303857209658	0.161877536252672	0.357496134493878	0.0531531515224507	0.194078649550379	0.0999026753959678	0.0473703509721644	0.0825198217352392
AI481877	0	0	0	0	0	0	0	0	0	0.00319001247996991	0	0	0
AI504432	0	0.0890551251224508	0.0386771318604203	0.0917777825415881	0	0	0.0807946512636555	0.0399662276329315	0.373672882127264	0.489999831276085	0.826495839076281	0.0189988471556388	0.0782700722663414
AI506816	1.69835536455563	7.40127848054055	6.83636030547006	10.28115768646	3.958711468564	0.941223363455866	1.4654276196706	1.65670944286105	4.15567285135423	1.43102141173785	0.920524421572347	0.554155399777824	2.00308582006203
AI507597	0	0.117439284359475	0	0	0	0.00815458483377694	0	0	0	0.00302170323095366	0.00271391925764538	0	0
AI593442	0	0	0.027228284579231	0	0	0.0275505190471139	0.0297107068474266	0.0448650315606767	0.447062636961062	0.0787776582458254	1.54669680913855	0.0423759893870456	0.0112712124217778
AI597479	0.352275712094891	0.0801787596340392	0.156478616104374	0.0180260729118597	0	0.121175282473033	0.396917126905088	0.244061079297341	0.314655077503734	0.397967698501746	0.441633422879045	0.160856852915705	0.288013523003111
AI606181	0.106435063967473	0.0942205136902406	0.0471898145200701	0.0325928243637881	0.111901884427734	0.0414643687010101	0.305744313361913	0.0305303425809741	0.0687587323380943	0.0905971224394244	0.0630860228723512	0.0797840925313894	0.0828328489862566
AI606473	0	0	0	0	0	0	0	0	0	0.00177461437086129	0.00617328542204135	0	0
AI607873	0	3.40137718412151	0.0438632961705885	0.170366353464071	0	0.00990527814838895	0	0.0471635261084098	0.0050266437250647	0.00254965382623903	0	0	0.0197594094307709
AI646519	0	0	0	0	0	0	0	0	0	0.000590066060845842	0.00286608175670176	0	0
AI661453	0	0	0	0.0361522443313281	0	0.0168607940801231	0	0	0	0.0074913748422169	0.00725147810833024	0	0
AI662270	0	0	0	0	0	0	0	0	0	0	0	0	0
AI837181	0.814358556146499	0.39582935059444	0.232727909372278	0.0770004114289884	0.44441924698393	0.297204615765139	0.102503673463313	0.335918253321941	0.585387656081102	0.755501139362274	0.618547029003375	0.312229367686486	0.335970640081338
AI838599	0	0	0.0138174412033333	0.015628125625125	0	0.0293341958223457	0.0250473394716013	0.044436365321537	0.040843338586327	0.052761790379888	0.0640783636819473	0.0318212607520508	0.0382071704287241
AI839979	0	0	0	0.0804582904222451	0	0.0481873393556437	0.0383691573365666	0	0	0.0589819722394196	0.037653135393874	0	0
AI846148	0.335345405767941	0.172215976247039	0.12744021792865	0.21968139592138	0.76881714713902	1.00724779071435	0.565359381355432	0.248572689285837	0.292062737260831	0.342729770194397	0.320577749221807	0.143665842305589	0.360073395757962
AI847159	0	0	0	0	0	0	0	0.0473505026255854	0	0.00403268500291526	0.00549459955366221	0	0.00333914344292402
AI854703	0	0	0	0	0	0.0139536945588998	0	0.0163059784239293	0.0685524225508624	0.0338868481792171	0.0778656582082728	0.0145728576570674	0.011609385956358
AI987944	0	0.233719103264435	0.370325288336752	0	0.381342425570908	0.223247000977743	0.203739830821652	0.118900075118616	0.469125311420498	0.246993033918775	0.297569872109553	0.295328469323071	0.345254568563542
AK010878	0.213123167332664	0.495503610722591	0.607515749163099	0.86891521853833	1.02614611879109	0.402447941323246	0.752898741324622	0.78576737606391	0.523656002524377	0.634910000596097	0.709220059768306	0.27309352299768	0.416432541320388
AK157302	0	0	0	0	0	0.0100760946669246	0	0	0	0.000956564496946875	0	0.00502460801776701	0.00884260864028976
AU015836	0	0	0	0	0	0.00785926261254464	0.034745627262809	0	0	0.00412476193173844	0.0015084485184622	0	0
AU016765	0	0	0	0	0	0	0	0	0	0.000776029711733888	0	0	0
AU018091	0	0	0	0	0	0.00320374812901109	0	0	0.00490625616348431	0.00242719766834335	0.00951651421698967	0	0.00629447043361348
AU019823	0.58855639386847	0.503634763268371	0.236734119959508	0.120939518688404	0.0733848005401121	0.440336141675884	0.212818239984033	0.28134865900065	0.287458127001545	0.240478806621099	0.212557181198275	0.18408738298868	0.226009710566399
AU019990	0	0	0	0	0	0	0	0	0	0.00385712368933447	0.00392164957579453	0.00418381157786178	0
AU020206	0	0	0	0.0202974798649	0	0	0	0	0	0.000253497858513466	0.00139675962940056	0	0
AU021092	0	0	0	0.0268194301407484	0	1.52048311406137	0	0	0	0.00782392330621111	0.00425522824930634	0	0
AU022252	0.422483487679052	0.360279969597166	0.615801286630703	1.2601290501646	0.659256522710873	0.826551485881709	1.05675779967444	1.49468321604339	1.46517256644776	1.34838842849285	1.5835940314742	1.2779449902639	1.93409137936175
AU022751	0	0	0	0	0	0	0	0	0.014467640387377	0.015930445115897	0.0118561521045344	0	0.00737408745667724
AU022754	0	0.0584795321637427	0	0	0	0.0292923444903298	0	0.037007404611458	0	0.00492907685372664	0.0124591948773636	0	0.00771784163159988
AU023070	0	0	0	0	0	0	0	0	0	0.000427176818310165	0	0	0
AU040320	0.23857238286096	0.444117062814136	0.580094667684178	0.426012904553512	0.227329684600297	0.294979907964356	0.0983641893013894	0.519083439598231	0.505591137902324	0.806336059033296	0.80645309157933	0.736636915657687	1.64771397888533
AU041133	0	0.0635647088736334	0.00958865623612641	0.0638276143790849	0.130316930775646	0.0323926539071881	0	0.0538591214569819	0.0418165405835806	0.0434607961674891	0.0540019847471047	0.0119577175108815	0
AV026068	0	0	0	0.0824103375527426	0.0688496598826802	0.00652182986893731	0	0	0.0134272078862096	0.0169233444667438	0.00764478640457534	0	0.013890046392755
AV039307	0	0	0	0	0	0	0	0.0283047172641793	0.00626320753889765	0.0106084826753402	0.00185897171351461	0.0105222389956748	0.00901927961209882
AV064505	0	0	0	0	0	0	0	0	0	0.00114428084155635	0	0	0
AV099323	0	0	0	0	0.0962612144314813	0	0	0	0	0.00259764165751491	0.00466632991025808	0	0.00718597298074159
AV320801	0	0	0	0	0	0	0	0	0	0	0	0	0
AW011738	0	0.0984503908480517	0	0.0180260729118597	0	0.0166692920924456	0.199542285211673	0.0691929277922889	0.0282186260650687	0.0176304955148983	0.00535314066512868	0.00482504390789956	0.0519542394921908
AW047730	0.217438573602957	0	0.0353980415638398	0	0	0.00493073306194579	0	1.50950654423356	0.818050786739783	0.00715883599874478	0.0021962263639741	0.0210457984993507	0.0089778856720127
AW112010	0	0.131374264241244	0.331835921522985	0.12612815650616	0	0.751639416837058	0	0	0	0.00353974622430526	0	0	0
AW121686	0	0	0	0	0	0	0	0.0157308390514933	0.00673865345531195	0.00480870439036651	0	0	0
AW146154	0	0	0.190582256522693	0.0837405929311407	0	0.124448713600449	0	0.217575322581179	0.0960171607494637	0.103002937232929	0.0855772651503578	0.0914922254018062	0.0986808398724046
AW209491	0	0.185845970859352	0.0737321444961923	0.0448478760045924	0	0.0913260534591215	0.113041345405296	0.0946676238780664	0.092760172933549	0.260061031289769	0.225637973333774	0.013049493725935	0.157082204830836
AW495222	0	0	0.00877966979661895	0	0	0	0	0	0.0475005778548441	0.00852003092993852	0.00661849156043798	0	0
AW549877	0.815181679288722	0.226343411016882	0.664541252538839	0.112086285459257	0.131068470168816	0.527487760527815	0.90879727931893	1.37760751794364	1.42016366818415	0.908455370504272	0.73903342916316	0.977924450527518	1.7268708980089
AW551984	0	0	0.0507188798910284	0	0	0.00493073306194579	0	0	0.327400174012844	0.236042979882654	2.19601642812618	0.0540424618259912	0.0347161449286024
AW554918	0	0	0.0233627798199277	0	0	0.00959707634666175	0	0	0	0.00691118772403306	0.000929485856757306	0	0.00955270417949913
AW822073	0	0	0	0	0	0	0	0	0	0	0	0	0
AW822252	0	0	0	0.0102324819908317	0	0.00322337748071131	0	0	0.00832744166835297	0.0414544038961199	0.0395777835480145	0.0155548564973335	0.00631592244047243
AY074887	0	0.0318054018294467	0.0629234290796033	0	0.257049627662346	0.0531358530463348	0	0.112356232476456	0.09649856120454	0.140027859477329	0.135842632340014	0.147507898182011	0.134912596929108
AY358078	0	0	0	0	0	0	0	0	0.00366618370806619	0.00419754450119075	0.00121751191213655	0	0
AY512915	0	0	0	0	0	0	0.0515772317468177	0	0.00230652680195677	0.00815693087563056	0.0159972251974486	0.0097691071524518	0
AY512931	0	0.0874569274632244	0	0	0	0	0	0	0.0231882600029559	0.00736230509084867	0.00860054974949584	0	0
AY702103	0	0	0.0243065936496593	0.0173418423973363	0	0	0	0	0.00203198218032907	0.00920002983383176	0.00863856675646162	0	0.0223755639427458
AY761184	0	0	0	0	0	0	0	0	0	0	0	0	0
AY761185	0	0	0	0	0	0	0	0	0	0	0	0	0
Aaas	0	0.13087405275788	0.0782752264854643	0	0.726295399295553	0.178220807798217	0.0232859231937109	0.0572591576539457	0.0791615725904397	0.0847874024677508	0.146706981101144	0.049484114671788	0.087232924725394
Aacs	0	0.0470344762711067	0.179637900362286	0.039437152953054	0.718793698426849	0.092656549755837	0.238439901840616	0.284250751178638	0.616570711332822	0.31081483349143	0.567600192329024	0.900035988028286	1.32374427532784
Aadac	0	0	0	0	0	0.00807118136267369	0	0	0.00538656117625259	0.00527341675606673	0.00765523419189907	0	0
Aadacl2	0	0	0	0	0	0.0022843567251462	0	0	0	0.00079814156614673	0	0	0
Aadat	0	0	0	0	0	0.0121576408341114	0	0	0.0176274728448679	0.00383213534428362	0.0112878528121884	0	0.0035631721924341
Aaed1	0	0	0.015571157855727	0	0	0.0596150346721211	0	0	0.0601307759686084	0.00389889788405049	0.00133235059153702	0.0148218414655837	0.00814887007767503
Aagab	0.0814000814000814	1.0584604488869	1.78662222711015	0.854451140363518	1.08666613141759	0.286049866683284	0.0404305040066629	0.255619794055586	0.282428659130544	0.849881920369501	0.935246763674413	0.354563116188576	0.288262204323086
Aak1	0	0.523891504669137	0.05532821831383	0.0249202551834131	0.0962612144314813	0.363384309339447	0.14480894795166	0.580142880533196	0.764174958662267	1.34395669485513	1.64320618747547	0.372161938343191	0.161658847790682
Aamdc	2.85194341133434	0.228273678994977	0.413717023294813	0.304378021478433	0.164586062287345	0.484287023023561	0.596331248000019	0.499290500511015	0.687274966639352	0.6066563780093	0.482806060250985	1.22432813435218	0.828473973726899
Aamp	1.34171725477356	1.90608490980042	1.31166354847524	0.816687369793923	1.88576787214226	0.853844552966876	0.929011392780313	1.41141389199599	1.73769391048816	1.89563375506358	1.89469849111133	2.07097136430832	1.26550368154021
Aanat	0	0	0.0141358540388255	0	0	0	0.0214251587068631	0	0	0.00639417942145346	0	0.00516618319802239	0
Aar2	0.280976978378487	0.229240249859891	0.0446704437523668	0.265446507387599	0.0940309173656298	0.10564442009715	0	0.257102719840535	0.151187548194788	0.192045238620635	0.235012567331851	0.0996561072998107	0.0887718047826584
Aard	0	0	0	0	0.0688496598826802	0.002375305939405	0.329779921307144	0.0373118751623108	0.13815331695923	0.0612987956555072	0.125085737971052	0.0274265653712186	0.110353431088869
Aars	0.696678912602979	0.907354982927103	1.302186406771	1.14101650209141	0.155058066893492	0.514939273848457	0.566400995139308	0.626554379498636	1.66645215449776	2.02300246992917	1.95201131989671	1.24325896575846	1.39395097069114
Aars2	0.579537197915569	0.100164771048375	0.0403903221271184	0.112393641524156	0.205112406746239	0.0130930424591418	0.0875448020969487	0.0920594151465356	0.190372536564934	0.188449096206628	0.223744551396648	0.163335852647988	0.0546771019151699
Aarsd1	0.329450620030848	0.0990235928134782	0.234654274045133	0.145176096189549	0.250595143507412	0.160516795564887	0.369662073078323	0.283073125464636	0.503993298585221	0.536243878781228	0.442950141231946	0.204531563072115	0.295538686381668
Aasdh	0	0.0339865549188741	0.106118112595758	0	0.113579573849439	0.0292589141339399	0	0.0791629983438258	0.0688231464996342	0.0540670954531587	0.0543551902821768	0.0417958304519141	0.0775117350280129
Aasdhppt	0.144387651968004	0.128706637302303	0.161047083282127	0.076428431030374	0.0940309173656298	0.290230044825357	0.160869029691593	0.320253784860088	0.34604655222247	0.473661339922728	0.46771359390005	0.242516695114427	0.490050349510216
Aass	0.116144018583043	0	0	0	0	0	0	0.176960240088627	0	0.0123218521451668	0.00278888166662244	0	0
Aatf	0	0.037074935860361	0.0980919663730405	0.0719405025969915	0	0.107321559415894	0.352144316636333	0.104855814282028	0.20732648038412	0.145476404385958	0.160434653651217	0.173093228886983	0.332151238840653
Aatk	0	0.0619486569531172	0.130352755575309	0.029603917646671	0.183968680433587	0.101990939133869	0.355802557426227	0.642980749374372	0.785236865490989	0.866161159244085	1.48580484009516	7.89779261433815	9.54579012860157
Abat	1.38314281909286	0.0463632654575127	0.187515395632205	0.448350071736012	1.83427255790055	0.134919129611821	0.507359823740926	4.15119913672726	1.92098856409093	1.30606070448172	2.54545212024697	0.381252935449659	2.83617103596004
Abca1	2.50814793239587	9.06582100726541	1.95451775326809	1.66726447879037	0.918421057046412	0.631834211637968	0.0313269468131097	2.68846213797115	0.930269030942219	0.0730317794718763	0.0560308323665529	0.0884110747813251	0.275534382924626
Abca12	0.292141396435875	0.0278032641032057	0	0	0.130316930775646	0.0617589483613574	0.0240033220597731	0.190157624241891	0.0628920451726674	0.0721042076233152	0.0737943176960138	0.0442881677824174	0.0244739165242086
Abca13	0	0	0	0	0	0	0	0.0377612131922574	0	0.00251649754049699	0.00200244939610131	0	0.00304622091925199
Abca14	0	0	0.01287846591714	0.0519448138297872	0	0	0	0	0	0.00510732350310109	0.00964332162827489	0	0.00775749451545138
Abca15	0	0	0	0	0	0.00320374812901109	0	0	0.00591277940839094	0.00910564780126522	0.00381725502839036	0	0
Abca16	0	0	0	0	0	0	0	0	0	0.00320351618861698	0.000929485856757306	0.016099170892699	0.0226087999679734
Abca17	0	0	0	0	0	0	0	0	0	0.0086501121294196	0.00631388450783033	0.0129763959357928	0.00972007755413331
Abca2	0.100973383416132	0.229944257975159	0.41732218479619	0	1.55641884550513	0.0249562640674892	0.453206559644637	0.905494572320834	0.792881562043057	0.755186236856244	1.15791810002901	11.7714163639503	4.24511850783451
Abca3	0.173773224513737	0.772157341076041	0.359743764127992	0.065984614367824	0.346198684729705	0.398815784502389	0.134277917415478	0.955760089631568	0.863292873686933	0.432483569651939	0.57150768167416	0.151991209090251	0.330166512050403
Abca4	0	0	0.0134351719366129	0	0	0.0912190357992086	0	0	0.0177801352416842	0.0156922016209087	0.00975743721746715	0.0300941948298173	0.019311735310855
Abca5	0.541568958156302	0.0502401479069954	0	0.015628125625125	0	0.0829824509003494	0.19291446081231	0.477872094008461	0.461557614320873	0.304166666125006	0.558529112402907	0.351619968879396	0.222157423235503
Abca6	0	0	0	0	0	0	0	0	0.141326107424396	0.00757671641453404	0.00959918609016962	0.016954622293088	0.00947048617687838
Abca7	0	0.0348645859481773	0.143423500916363	0.0660595164064834	0	0.234943513478802	0.256479934512906	0.149607454698025	0.155058935456327	0.105208122870302	0.105004499346473	0.0844026104454932	0.140837793062456
Abca8a	0	0	0	0.118550834597876	0	0	0	0	0.0109337993011013	0.00395915036960758	0	0.0106749219396333	0
Abca8b	0.487603711853202	0	0.0317741113465579	0.0325928243637881	0.0820035097502173	0	0	0.254474838306327	0.296820166361643	0.196023432320315	0.205018706129631	0.27061801106657	0.107882527154705
Abca9	0.577997704081482	1.00446944587729	0.783867572073077	0.0516017173051519	0	0.023392767898057	0.0683438241103343	0.0254655095139144	0.017328983872224	0.00481162125847815	0	0.0133436524245416	0.0145709980812216
Abcb10	0.102011670135063	0.113405686161104	0.0713869514405336	0	0.109899771408475	0.329903489657367	0.385815123547203	0.30194057972897	0.28128896307929	0.210689424394231	0.422872355838411	0.734116602378142	0.239544297558809
Abcb11	0	0	0	0	0	0	0	0	0	0.00681494552317551	0.00348725377800375	0	0.0120267300154469
Abcb1a	0	0	0.0254568874881944	0.0501122514432328	0	19.3067971701093	0.381748797646122	0	0.0417902134195715	0.0260685210653417	0.00633392299059804	0.0135038590708728	0.0261793458664314
Abcb1b	0	0.833710659704641	0.332729866604563	0.782550070670854	0.275482093663912	0.285106145354636	0	0.0628739710210858	0.0847575562495732	0.0447736356598289	0.030781422219372	0.0199818165469423	0.0752033860638799
Abcb4	0	0.525285009144608	0.806497789057674	0.634847056646027	0.529281164343156	0.86459348479162	0.0814876432273163	0.648921236396817	0.868318278185526	0.515262348628477	0.472674063563086	0.180092594295777	0.678424006158467
Abcb5	0	0	0	0	0	0	0	0	0	0.00683308424934681	0.0103667244116715	0	0
Abcb6	0	0.0812215724496426	0.036877269985091	0.0180260729118597	0.131068470168816	0.0685269232686729	0.0505921814842734	0	0.0828632804756197	0.0855171088980481	0.110212809413898	0.0451925663333987	0.0903073279829483
Abcb7	0.225149161319374	0.132455208745915	0.439647647168781	0.592930449073735	0.358907148320206	0.226780644550014	0.475312155768726	0.290461856844394	0.433006146161478	0.493396653665204	0.530395949072925	0.185382038476233	0.307462943381185
Abcb8	0.491718293414281	0.0353992325446384	0.163066200034367	0.0568464438046742	0.201911654378032	0.118817058090206	0.306399753420089	0.690990256530362	0.465379809066892	0.410749123246422	0.52654234587894	1.03934427591862	0.429515074668088
Abcb9	0.13574414942716	0	0.0853188186521419	0.262022007661327	0	0.140166897281403	0	0.723864725095116	0.133547872400982	0.247817182130819	0.297318844540908	0.140560679979803	0.192229002982427
Abcc1	0	0.223754788283432	0.446405791767011	0.483320795803598	0.421871970071561	0.0703786400083927	0.0947427261272016	0.0555088427890704	0.506930798809009	0.161167988432034	0.175168309733389	0.249188865139892	0.537561921270058
Abcc10	0	0.0233171978324333	0.0527960449410339	0.161522671486253	0.187209824771604	0.0473083397413627	0.144737914166654	0.0630336648617931	0.0837287396266825	0.0750584865055599	0.0957603378536316	0.0681403609770967	0.0364445688206343
Abcc12	0	0	0	0	0	0.0118022509252965	0	0.0231764749508659	0.0223373253504377	0.0305728539973951	0.0147325975964547	0.00757535585234116	0.0100791353157386
Abcc2	0	0	0	0	0	0.0218173987771399	0	0	0.00567828538494516	0.0051584273762907	0.00990472770788713	0	0
Abcc3	0	0.207607838868573	0.611718760216326	0.294564067870111	0	0	0	0	0.0119744417515255	0.00316969352450548	0.00481357214303037	0.0276563969246087	0
Abcc4	0.0761904761904762	0.0901256457955667	0.147902992185616	0.0910244346329147	0.370628474681508	2.16138664236338	0	0.222786538116612	0.0751090686924817	0.0312304157539314	0.0197306156724759	0.00502460801776701	0.134579404972945
Abcc5	0.321238017908249	0.456406163042288	0.628131204200204	0.47735848437443	2.65491396375366	0.46489799945568	0.253220838386942	0.932952916541372	0.777138675396177	0.797006116290584	1.25212625904292	0.550618713620423	0.534420347232473
Abcc6	0	0	0	0.0250561257216164	0	0.0904159680610456	0	0	0	0.00467874068883238	0	0	0
Abcc8	0	0	0	0	0	0.0105731492759507	0	0.0368340405469118	0.00635892035706609	0.0700545535540408	0.106474649395139	0	0
Abcc9	0.201946766832263	0	0.0192010076688825	0.10911312849162	0	0.834856986066164	24.5113127991979	0	0.0177309937996422	0.021569366775315	0.0240871752371364	0	0.0440602034110949
Abcd1	0	0.491512061061566	0.799898177711409	0.191038670495541	0.0730545571432746	0.191397641129928	0.225074190209717	0.117762139557294	0.168987096866259	0.153967812253743	0.104735249691254	0.198561058860197	0.133823222197487
Abcd2	1.06482327241681	0.766306958161064	1.21461634291451	1.03298171321834	0.47314029981724	0.255954661730958	0.285455889299889	1.40276362089771	0.488846983233311	0.596520315592883	0.642910770705054	0.160798701730197	0.412286794344864
Abcd3	0.26952782658497	0.226238628194892	0.384135916910784	0.228891175655003	1.01525951555174	0.365401682777115	0.391330333091063	1.99346048436595	1.39855026221021	0.67450960404355	0.542147454549581	0.518981715527187	1.425108200153
Abcd4	0.382789771857296	0.257534293249191	0.194813651774459	0.376380382136218	0.615767779333409	0.196666470348804	0.280422762246259	0.731652283766096	0.544415435580256	0.255454037967517	0.269914325682376	0.420268851029016	0.282473398465195
Abce1	0.486628248875104	0.404297217301176	0.747796130318436	0.635247378541531	1.37414264073561	1.0399865860488	0.591817312142146	0.438313887486204	1.26773402386035	1.41297075124431	0.930931624044919	0.797865576502946	1.29789238371104
Abcf1	0.735296586838992	0.354568164877301	0.355361817423197	0.342576602951803	0.392453871113279	0.378028134571202	0.274210569511662	0.406581116067594	0.386313190986715	0.403050246066638	0.527380269903414	0.356745092322141	0.222679567587068
Abcf2	0.319972464261041	0.394883190666326	0.332198405679318	0.0349325486545295	0	0.207113571693847	0.135040705848293	0.327104192538506	0.31806492854265	0.966738099659025	0.806800160778752	0.133128883556518	0.391159967160554
Abcf3	0.349432944237778	0.111389585073796	0.277558703689868	0.2334175959509	0.439921675221739	0.268654774773001	0.3596572735051	0.1716507927801	0.367468023493458	0.550560238726705	0.501032138852106	0.188165386445866	0.335603055106846
Abcg1	0	0.346758832277612	0.497818661161322	0.443609917445459	0	0.0327242140949761	0.0903481112727338	0.147844665398517	0.552864198689044	0.287462294129851	0.235898852820672	0.584605646703864	0.102841098937698
Abcg2	0.379110626438871	0.196728056133493	0.436654439859439	0.199661507702005	0	6.39065216231684	0.561741617446948	0.0247772525000248	0.493463571162521	0.0348716429630793	0.0654166107902156	0.0757676634129323	0.148883977013722
Abcg3	0.0761904761904762	0.621773646213243	0.0792000820115355	0.082847295864263	0	0.0741017703501287	0	0	0	0.00668465649818559	0.00291406877435433	0	0
Abcg4	0	0	0.00263658220902876	0	0	0.0681934248451733	0	0.300751129669808	0.459384999960861	0.657723812967869	0.754196779318485	0.00346855494798035	0.165123793515332
Abcg5	0	0	0	0	0	0.00815075639019301	0	0	0	0.00181850735038419	0.00220744119597398	0	0
Abcg8	0	0	0	0	0	0.0067031317031317	0	0.0192326925000192	0	0.00495813956754876	0.0084170992877092	0	0
Abhd1	0.346852075024191	0.0760132567119706	0.0730261243685863	0.0483147804576376	0	0.0436982915963836	0	0.0437709553448713	0.0659018877057045	0.0597978846178801	0.0160728970867682	0.0180436614023954	0.0336154137011356
Abhd10	0.213123167332664	0.151772344763001	0.0935685525664749	0.200101191676318	0.701870140420415	0.666304569063706	0.614789045317433	0.662297746082369	0.337717550959745	0.545187680048626	0.501155635043984	0.201317748440458	0.073483285058391
Abhd11	0.179830240253201	0.0235046351140445	0.14957069782139	0	0.195419369967951	0.0771848645645534	0	0.125455543945997	0.115272748480661	0.230205011441837	0.285920314163702	0.0806820565651863	0.14527775510567
Abhd11os	0	0	0.0732651633299714	0.0432825484764543	0	0.0382551852825502	0.0264477498254448	0.045104910035902	0.00240483641461015	0.772307379489397	0.412819332135615	0.0637943972432419	0.0565452158137259
Abhd12	0.361624875265613	3.18850099340844	7.54266472831528	3.5414383591057	0.234776825354776	0.214379787564244	0.508687243366798	1.25360973330212	3.00306670339612	0.813016515578721	1.42380245228531	1.26437390500844	1.70123535366766
Abhd12b	0	0	0	0	0	0	0.0459577831803705	0	0	0.0139997207272506	0.0263417629902306	0.00570497844944391	0
Abhd13	0	0	0.165917181450565	0.0408603556485356	0.647076871748732	0.158646518174814	0.383053067594037	0.614996482330558	0.518089745015658	0.413949533652357	0.449780757076316	0.0423175063080154	0.231246791995267
Abhd14a	0.0761904761904762	0	0.0776806482509233	0	2.77626226190452	0.0761928077643033	0.283559406979999	0.35681548943882	0.277482166857981	0.118130507192812	0.101015239506767	0.337282508514203	0.114345488116158
Abhd14b	0.199576896978406	0.054551802391551	0.12809777280037	0.0591408024224073	1.21143110069866	0.136076827348874	0.174818656803123	0.323641936344382	0.0253128226323067	0.129221559159281	0.126935728229378	0.0350359467896356	0.0325774272097399
Abhd15	0	0	0.0801800527504976	0	0	0.00960769845661932	0	0.0312827491279934	0.0048262338628838	0.039787324663833	0.0124389318033698	0.0111623338207552	0.00668272302251543
Abhd16a	1.06417462555922	0.969092430649621	0.729260602558516	0.331301291286519	0.748614060979039	1.09037829156805	0.978447668970011	1.24878929078903	1.27900325326748	1.08634333309835	1.14647497279001	1.2520397301429	1.29349026157194
Abhd16b	0	0	0	0	0	0.0042169325020916	0	0	0	0.00125743449520201	0	0	0
Abhd17a	0.297094702561221	0.34087335391758	0.394987433771974	0.258121226795653	0.403840592362789	0.4750321581057	0.389969951858941	0.566592134894141	0.464235107122038	0.553214750242702	0.452011059360921	0.76539934565294	0.547801799998026
Abhd17c	0.403076104158413	0.125655817541311	1.64384447792572	1.23048614903509	0.369248947640499	0.337292927767257	0	0.285583327062126	0.678431711237473	0.131631516193141	0.158339369177471	0.288883235232038	0.515670940697408
Abhd18	0	0.0445275625612254	0.0544619835593571	0.0102324819908317	0	0.0717842178923365	0	0.215022548834133	0.232124955455688	0.243044680745391	0.292161967347395	0.184257970416373	0.116438255201865
Abhd2	0.403893533664526	0.309309225292291	0.425873665462144	0.126572905993852	0.218590697889933	5.26951556947039	1.57635095760961	0.505090035063189	3.60197616788243	0.260865684566071	0.188525685766487	0.161213600463588	0.324083391572109
Abhd3	0	0.163363165376127	0.195222488638488	0.373617922024247	4.82327010459805	0.0992995432490526	0.345538823589518	7.6840892566939	0.984017709714118	0.421658378573562	0.36150785073914	1.1486945010031	2.39607708111909
Abhd4	1.21413358239399	0.238492500347261	0.994365875329782	0.290817383904303	1.11928733444333	0.429601634562879	0.652046655826912	2.87652033311954	2.11901916305187	0.171938455551355	0.0677191885283479	1.83295384555123	1.95893993534622
[truncated: 23,290 more rows]
