# Supplementary material for: Anatomical and single-cell transcriptional profiling of the murine habenular complex
Source: eLife. 2020 Feb 11;9:e51271. doi: 10.7554/eLife.51271 (PMC7012610; doi:10.7554/eLife.51271)
Supplement: Supplementary file 2. [file elife-51271-supp2.xlsx]

## Sheet: Table_2_allcells_DEGs_MAST
	p_val	avg_logFC	pct.1	pct.2	p_val_adj	cluster	gene
Dcn	2.18038e-103	4.26251	0.952	0.005	5.51395e-99	14	Dcn
Igfbp2	5.44232e-103	3.71972	1	0.011	1.37631e-98	14	Igfbp2
Igf2	4.54299e-101	4.99857	1	0.027	1.14888e-96	14	Igf2
Col1a2	4.64177e-96	3.92809	0.976	0.024	1.17386e-91	14	Col1a2
Apod	1.21216e-91	4.20011	1	0.076	3.06542e-87	14	Apod
Col1a1	5.87917e-90	3.47706	0.857	0.006	1.48678e-85	14	Col1a1
Spp1	5.18309e-73	3.22071	0.786	0.005	1.31075e-68	14	Spp1
Col15a1	3.3257e-68	2.95603	0.81	0.013	8.41037e-64	14	Col15a1
Bgn	1.55851e-62	3.09141	0.857	0.028	3.94131e-58	14	Bgn
Slc7a11	4.5348e-61	3.08453	0.905	0.05	1.14681e-56	14	Slc7a11
Col3a1	4.55508e-61	2.94719	0.714	0.007	1.15194e-56	14	Col3a1
Serping1	2.72906e-59	2.6023	0.738	0.01	6.90152e-55	14	Serping1
Lum	5.26807e-59	2.52015	0.619	0.001	1.33224e-54	14	Lum
Itih5	1.61606e-56	3.1016	0.857	0.043	4.08684e-52	14	Itih5
Slc22a6	4.96004e-54	2.38014	0.619	0.003	1.25435e-49	14	Slc22a6
Slc6a13	8.04584e-52	2.70446	0.643	0.005	2.03471e-47	14	Slc6a13
Ptgds	8.10096e-52	3.91007	0.833	0.143	2.04865e-47	14	Ptgds
Lama1	4.3215e-49	1.94585	0.595	0.013	1.09287e-44	14	Lama1
Clmp	2.43966e-48	2.22201	0.667	0.04	6.16966e-44	14	Clmp
Edn3	1.4078e-47	2.81564	0.667	0.018	3.5602e-43	14	Edn3
Nupr1	4.50701e-46	2.59298	0.667	0.013	1.13978e-41	14	Nupr1
Tbx18	6.17314e-46	2.56672	0.595	0.006	1.56113e-41	14	Tbx18
Prelp	6.29611e-46	2.59371	0.69	0.016	1.59222e-41	14	Prelp
Ptn	2.09173e-45	2.41954	1	0.35	5.28978e-41	14	Ptn
Slc6a20a	5.89664e-45	2.60239	0.786	0.022	1.4912e-40	14	Slc6a20a
Vtn	1.90058e-43	2.44841	0.81	0.028	4.80639e-39	14	Vtn
Col13a1	4.69632e-43	2.22978	0.5	0.004	1.18765e-38	14	Col13a1
Pcolce	6.19696e-42	2.04003	0.524	0.006	1.56715e-37	14	Pcolce
Aldh1a2	6.16792e-41	2.02235	0.476	0.002	1.5598e-36	14	Aldh1a2
Cyp1b1	5.50685e-40	2.12488	0.476	0.004	1.39263e-35	14	Cyp1b1
Islr	6.55236e-40	2.06402	0.476	0.002	1.65703e-35	14	Islr
Colec12	1.58065e-39	2.30224	0.69	0.066	3.99732e-35	14	Colec12
Slc13a4	1.27138e-38	2.26428	0.452	0.005	3.21518e-34	14	Slc13a4
Laptm4a	4.4664e-38	1.66327	0.952	0.653	1.12951e-33	14	Laptm4a
Aldh1a1	4.78148e-38	2.39628	0.548	0.011	1.20919e-33	14	Aldh1a1
Itih2	4.95315e-38	1.75441	0.429	0.001	1.2526e-33	14	Itih2
Fam180a	9.52006e-38	1.99755	0.429	0.001	2.40753e-33	14	Fam180a
Serpinh1	2.19917e-36	2.29706	0.786	0.071	5.56149e-32	14	Serpinh1
Lamc1	3.65458e-34	2.27816	0.714	0.068	9.24208e-30	14	Lamc1
Flrt2	8.74749e-34	1.87405	0.619	0.084	2.21215e-29	14	Flrt2
Cemip	2.16784e-33	1.83794	0.405	0.021	5.48225e-29	14	Cemip
Cmbl	3.56329e-33	1.82799	0.476	0.08	9.01121e-29	14	Cmbl
Col4a5	4.6567e-33	2.20476	0.476	0.008	1.17763e-28	14	Col4a5
Atp1a2	5.11283e-32	1.99233	0.976	0.241	1.29298e-27	14	Atp1a2
Gjb2	1.51436e-31	1.90336	0.476	0.006	3.82966e-27	14	Gjb2
Efemp1	3.16626e-31	2.11282	0.429	0.005	8.00714e-27	14	Efemp1
Cxcl12	3.35631e-31	2.35467	0.762	0.067	8.48778e-27	14	Cxcl12
Serpinf1	3.40215e-31	1.87482	0.5	0.014	8.60369e-27	14	Serpinf1
Vwa1	1.45625e-28	2.13885	0.69	0.065	3.68272e-24	14	Vwa1
Mxra8	4.11592e-28	1.73198	0.524	0.034	1.04088e-23	14	Mxra8
Fos	2.99552e-27	2.40654	0.667	0.227	7.57538e-23	14	Fos
Cp	4.18698e-27	2.07361	0.548	0.064	1.05884e-22	14	Cp
Nr2f1	2.4133e-26	1.91253	0.667	0.068	6.10299e-22	14	Nr2f1
Col6a2	4.23716e-26	1.53266	0.381	0.007	1.07154e-21	14	Col6a2
Nid1	9.77365e-26	1.72315	0.5	0.016	2.47166e-21	14	Nid1
Enpp1	1.47728e-25	1.68464	0.429	0.019	3.7359e-21	14	Enpp1
Col6a1	2.24417e-25	1.38448	0.333	0.006	5.67527e-21	14	Col6a1
Wnt5a	8.16189e-25	1.6942	0.429	0.02	2.06406e-20	14	Wnt5a
S100a6	9.80019e-25	1.81408	0.595	0.043	2.47837e-20	14	S100a6
Egr1	1.11058e-24	2.38978	0.69	0.173	2.80854e-20	14	Egr1
Tgfbi	1.63949e-24	1.93504	0.429	0.011	4.14611e-20	14	Tgfbi
Foxc1	2.13542e-24	1.9974	0.571	0.036	5.40027e-20	14	Foxc1
Timp3	2.17692e-24	1.92807	0.81	0.157	5.50522e-20	14	Timp3
Id3	1.36612e-23	2.27563	0.69	0.088	3.45479e-19	14	Id3
Fosb	2.16901e-23	2.12226	0.595	0.175	5.48522e-19	14	Fosb
Pdgfra	2.54289e-23	1.41046	0.786	0.112	6.43071e-19	14	Pdgfra
Col4a1	1.28238e-22	1.9078	0.667	0.08	3.24301e-18	14	Col4a1
Col5a2	1.82155e-22	1.57874	0.381	0.009	4.60653e-18	14	Col5a2
Rtn1	5.82038e-22	-2.98075	0.024	0.69	1.47192e-17	14	Rtn1
Sparc	1.23321e-21	1.56645	0.929	0.281	3.11866e-17	14	Sparc
Lamb1	1.43179e-21	1.64917	0.429	0.027	3.62086e-17	14	Lamb1
Lgals1	1.73311e-21	1.74828	0.452	0.02	4.38287e-17	14	Lgals1
Trf	2.73463e-21	1.58467	0.881	0.214	6.9156e-17	14	Trf
Tgfbr3	6.77188e-21	1.67252	0.452	0.035	1.71254e-16	14	Tgfbr3
Gjb6	8.03195e-21	1.62411	0.524	0.033	2.0312e-16	14	Gjb6
Bmp7	2.55852e-20	1.41978	0.524	0.164	6.47025e-16	14	Bmp7
Ctgf	5.82072e-20	1.75474	0.31	0.005	1.472e-15	14	Ctgf
Kcne4	2.02646e-19	1.72127	0.381	0.012	5.12472e-15	14	Kcne4
Oaf	2.74187e-19	1.24077	0.357	0.009	6.93392e-15	14	Oaf
Cebpb	3.61059e-19	2.21397	0.595	0.124	9.13083e-15	14	Cebpb
Col4a6	8.55056e-19	1.23107	0.262	0.003	2.16235e-14	14	Col4a6
Inmt	1.28373e-18	1.63563	0.214	0.001	3.24642e-14	14	Inmt
Serpine1	1.40705e-18	2.18013	0.333	0.013	3.55829e-14	14	Serpine1
Il34	1.48452e-18	1.53578	0.405	0.036	3.7542e-14	14	Il34
Syt11	2.07006e-18	-2.24758	0.048	0.699	5.23497e-14	14	Syt11
Fgfr1	2.23184e-18	1.6844	0.476	0.053	5.64411e-14	14	Fgfr1
Hic1	2.90575e-18	1.4386	0.333	0.008	7.34835e-14	14	Hic1
Lamc3	2.93363e-18	1.66237	0.357	0.03	7.41887e-14	14	Lamc3
Gpr182	4.54881e-18	1.43576	0.31	0.007	1.15035e-13	14	Gpr182
Mdk	5.6636e-18	1.70781	0.476	0.049	1.43227e-13	14	Mdk
Atf5	5.78519e-18	1.72917	0.381	0.136	1.46302e-13	14	Atf5
Selenbp1	1.02648e-17	1.21389	0.333	0.009	2.59586e-13	14	Selenbp1
Jund	1.14613e-17	1.25164	0.643	0.585	2.89844e-13	14	Jund
Nsg2	1.31585e-17	-2.60085	0	0.589	3.32764e-13	14	Nsg2
Junb	6.82667e-17	2.16926	0.643	0.15	1.7264e-12	14	Junb
Col18a1	8.69066e-17	1.22469	0.381	0.036	2.19778e-12	14	Col18a1
Pcsk1n	1.1328e-16	-1.80512	0	0.568	2.86474e-12	14	Pcsk1n
Fmo1	1.14552e-16	1.13981	0.333	0.012	2.8969e-12	14	Fmo1
Slc3a2	2.31094e-16	1.51667	0.69	0.3	5.84413e-12	14	Slc3a2
Vcam1	2.35456e-16	1.86228	0.476	0.048	5.95443e-12	14	Vcam1
Uchl1	2.63595e-16	-2.47537	0.024	0.61	6.66605e-12	14	Uchl1
Zcchc18	2.72497e-16	-2.03449	0	0.559	6.89119e-12	14	Zcchc18
Olfml3	3.79339e-16	1.50093	0.571	0.072	9.5931e-12	14	Olfml3
Bicc1	6.39611e-16	1.42969	0.333	0.033	1.61751e-11	14	Bicc1
Igfbp4	7.83695e-16	1.39524	0.452	0.037	1.98189e-11	14	Igfbp4
Srpx2	7.84644e-16	1.19687	0.19	0.002	1.98429e-11	14	Srpx2
Eef1a2	1.18458e-15	-1.96943	0	0.543	2.99568e-11	14	Eef1a2
H2.Q4	1.52057e-15	-1.39862	0.333	0.848	3.84536e-11	14	H2.Q4
Lamb2	1.79537e-15	1.32147	0.476	0.044	4.54031e-11	14	Lamb2
Tcf4	2.06336e-15	1.35606	0.762	0.41	5.21803e-11	14	Tcf4
Cpe	3.42904e-15	-1.50828	0.071	0.668	8.67171e-11	14	Cpe
Herpud1	3.50508e-15	1.36804	0.571	0.299	8.86399e-11	14	Herpud1
Ncald	3.6351e-15	-1.82829	0	0.531	9.19281e-11	14	Ncald
Dpp6	3.76863e-15	-1.71497	0	0.53	9.53049e-11	14	Dpp6
Gnao1	3.99469e-15	-2.15138	0.048	0.594	1.01022e-10	14	Gnao1
Kif1b	4.00191e-15	-1.51548	0	0.529	1.01204e-10	14	Kif1b
Gypc	4.56376e-15	1.28974	0.262	0.008	1.15413e-10	14	Gypc
Sparcl1	5.3253e-15	1.02255	0.857	0.296	1.34672e-10	14	Sparcl1
Arhgap29	5.74661e-15	1.37647	0.452	0.043	1.45326e-10	14	Arhgap29
Fmod	7.21872e-15	1.46196	0.167	0.002	1.82554e-10	14	Fmod
Pltp	7.22069e-15	1.033	0.595	0.097	1.82604e-10	14	Pltp
Mrc2	7.26039e-15	1.4411	0.31	0.013	1.83608e-10	14	Mrc2
Mapt	9.08969e-15	-1.63806	0	0.52	2.29869e-10	14	Mapt
Elavl3	9.30627e-15	-1.56332	0	0.52	2.35346e-10	14	Elavl3
Slc1a5	9.77643e-15	1.32091	0.286	0.018	2.47236e-10	14	Slc1a5
Snap25	1.13626e-14	-2.0446	0	0.518	2.87348e-10	14	Snap25
Epha7	1.20192e-14	1.17462	0.429	0.235	3.03953e-10	14	Epha7
Meg3	1.20303e-14	-2.57008	0.071	0.648	3.04235e-10	14	Meg3
Basp1	1.26245e-14	-1.8657	0	0.516	3.19262e-10	14	Basp1
Thy1	1.36998e-14	-2.02277	0	0.516	3.46453e-10	14	Thy1
Ndrg4	1.66429e-14	-2.4359	0.024	0.577	4.20883e-10	14	Ndrg4
Emp1	1.76123e-14	1.53055	0.238	0.013	4.45397e-10	14	Emp1
Kif1a	2.20439e-14	-1.46785	0	0.51	5.57467e-10	14	Kif1a
Tspan13	2.31393e-14	-2.32718	0.071	0.623	5.85171e-10	14	Tspan13
Aplp1	2.35192e-14	-2.12841	0.024	0.581	5.94776e-10	14	Aplp1
2019-03-06	2.42801e-14	1.11001	0.548	0.403	6.1402e-10	14	2019-03-06
Nr1d1	2.70347e-14	1.38829	0.548	0.148	6.83681e-10	14	Nr1d1
Ctsl	3.61741e-14	1.34685	0.738	0.34	9.14807e-10	14	Ctsl
Stxbp1	3.65153e-14	-1.65003	0	0.504	9.23436e-10	14	Stxbp1
Necab2	4.23397e-14	-1.92795	0	0.502	1.07073e-09	14	Necab2
Pcsk2	4.68938e-14	-1.67224	0	0.501	1.1859e-09	14	Pcsk2
Fkbp9	4.76283e-14	1.56482	0.452	0.081	1.20447e-09	14	Fkbp9
Col4a2	5.0024e-14	1.49679	0.5	0.068	1.26506e-09	14	Col4a2
Dclk1	5.81352e-14	-1.73817	0	0.499	1.47018e-09	14	Dclk1
Srcin1	5.81352e-14	-1.51559	0	0.499	1.47018e-09	14	Srcin1
Hist1h1c	6.38933e-14	1.74835	0.381	0.046	1.6158e-09	14	Hist1h1c
X1810041L15Rik	7.3629e-14	-1.65872	0	0.496	1.862e-09	14	X1810041L15Rik
Snrpn	8.304e-14	-1.89055	0.048	0.601	2.1e-09	14	Snrpn
Atp1b1	9.50763e-14	-2.38859	0.048	0.568	2.40439e-09	14	Atp1b1
Ndnf	1.13639e-13	1.84595	0.333	0.025	2.87381e-09	14	Ndnf
Hspa5	1.40942e-13	1.03262	0.738	0.645	3.56428e-09	14	Hspa5
Cntn1	1.43605e-13	-1.68567	0	0.488	3.63163e-09	14	Cntn1
Scg5	1.62135e-13	-1.44779	0	0.486	4.10023e-09	14	Scg5
P4hb	1.76034e-13	1.16254	0.643	0.337	4.45173e-09	14	P4hb
Nr4a1	1.83871e-13	1.73106	0.524	0.116	4.64991e-09	14	Nr4a1
Slc22a17	1.9388e-13	-1.62604	0.095	0.652	4.90302e-09	14	Slc22a17
Gpm6a	2.06237e-13	-1.4003	0.071	0.629	5.21552e-09	14	Gpm6a
Ank3	2.06466e-13	-1.39534	0	0.483	5.22132e-09	14	Ank3
Gstm2	2.40047e-13	1.31411	0.214	0.003	6.07055e-09	14	Gstm2
Vat1l	2.5412e-13	-1.67146	0	0.481	6.42643e-09	14	Vat1l
Stmn3	3.25968e-13	-1.89374	0.024	0.548	8.24341e-09	14	Stmn3
Hes1	3.57734e-13	2.04329	0.476	0.072	9.04673e-09	14	Hes1
Kl	3.62012e-13	1.04861	0.167	0.023	9.15493e-09	14	Kl
Syp	3.83823e-13	-1.53271	0	0.476	9.70651e-09	14	Syp
Spock2	5.50154e-13	-1.89074	0.095	0.621	1.39128e-08	14	Spock2
Acot7	5.8997e-13	-1.44533	0	0.47	1.49197e-08	14	Acot7
Ifitm2	6.06294e-13	0.999965	0.333	0.02	1.53326e-08	14	Ifitm2
Pcp4	6.43766e-13	-2.81581	0.024	0.526	1.62802e-08	14	Pcp4
Tmem176b	7.22551e-13	-1.46684	0	0.468	1.82726e-08	14	Tmem176b
Ctnnbip1	7.22551e-13	-1.89355	0	0.468	1.82726e-08	14	Ctnnbip1
Mdh1	8.45591e-13	-1.72193	0.119	0.645	2.13842e-08	14	Mdh1
Tmem130	8.75563e-13	-1.85887	0.024	0.539	2.21421e-08	14	Tmem130
Cntnap2	8.93509e-13	-1.55446	0	0.465	2.25959e-08	14	Cntnap2
Gabbr1	1.10828e-12	-2.02351	0.143	0.652	2.80272e-08	14	Gabbr1
Kcnma1	1.12729e-12	-1.90918	0	0.462	2.8508e-08	14	Kcnma1
Zbtb20	1.1936e-12	1.45473	0.405	0.07	3.0185e-08	14	Zbtb20
Nr2f2	1.32542e-12	1.38493	0.381	0.059	3.35186e-08	14	Nr2f2
Ncdn	1.37649e-12	-1.35972	0	0.46	3.48101e-08	14	Ncdn
Nwd2	1.38951e-12	-2.65498	0.024	0.525	3.51392e-08	14	Nwd2
Cped1	1.4234e-12	1.16273	0.238	0.007	3.59965e-08	14	Cped1
B3gat1	1.45056e-12	-1.40632	0	0.459	3.66831e-08	14	B3gat1
Pdgfrb	1.51596e-12	0.907589	0.357	0.029	3.83372e-08	14	Pdgfrb
Map1b	1.79502e-12	-2.0874	0.095	0.608	4.53942e-08	14	Map1b
Rcn3	1.80734e-12	1.17905	0.262	0.035	4.57058e-08	14	Rcn3
Atp6v1a	2.01765e-12	-1.57986	0.048	0.57	5.10244e-08	14	Atp6v1a
Ptprn	2.31821e-12	-1.32313	0	0.453	5.86252e-08	14	Ptprn
Rtn3	2.40609e-12	-1.25679	0.238	0.763	6.08477e-08	14	Rtn3
Syt9	2.46682e-12	-1.84487	0	0.452	6.23833e-08	14	Syt9
Ina	2.67952e-12	-1.37843	0	0.451	6.77623e-08	14	Ina
Syt4	3.16003e-12	-1.49095	0	0.449	7.99139e-08	14	Syt4
Nrn1	3.20537e-12	-1.89262	0.024	0.527	8.10606e-08	14	Nrn1
Rit2	3.25906e-12	-1.3529	0	0.449	8.24183e-08	14	Rit2
Ncam1	3.36112e-12	-1.40842	0	0.448	8.49994e-08	14	Ncam1
Gja1	3.39441e-12	0.347198	0.452	0.076	8.58412e-08	14	Gja1
Cadm1	3.67069e-12	-1.45003	0.024	0.518	9.28281e-08	14	Cadm1
Lhfp	4.13814e-12	1.41067	0.429	0.13	1.0465e-07	14	Lhfp
Flna	4.38583e-12	1.4647	0.452	0.084	1.10913e-07	14	Flna
Rab3a	4.84402e-12	-1.37295	0.024	0.516	1.225e-07	14	Rab3a
Cacnb3	5.07995e-12	-2.14981	0.024	0.516	1.28467e-07	14	Cacnb3
Calm3	5.13475e-12	-1.46971	0.095	0.627	1.29853e-07	14	Calm3
Syt1	5.19363e-12	-1.86322	0.024	0.499	1.31342e-07	14	Syt1
Enc1	6.5214e-12	-1.32553	0	0.439	1.6492e-07	14	Enc1
Tnfsf12	7.49188e-12	1.2406	0.333	0.035	1.89462e-07	14	Tnfsf12
Sh3gl2	7.82148e-12	-1.41742	0	0.437	1.97797e-07	14	Sh3gl2
Nid2	1.0399e-11	0.857856	0.262	0.011	2.62979e-07	14	Nid2
Bmp5	1.1606e-11	0.963288	0.238	0.012	2.93503e-07	14	Bmp5
Sncb	1.25284e-11	-1.28697	0	0.431	3.1683e-07	14	Sncb
Klc1	1.43663e-11	-1.77157	0.095	0.575	3.63309e-07	14	Klc1
Fbln2	1.4455e-11	1.23656	0.262	0.014	3.65554e-07	14	Fbln2
Thbs2	1.54966e-11	0.891544	0.238	0.012	3.91893e-07	14	Thbs2
Pbx1	1.57239e-11	-1.28742	0.071	0.584	3.97642e-07	14	Pbx1
Gm20604	1.72627e-11	0.733938	0.024	0.179	4.36557e-07	14	Gm20604
Eid1	1.72903e-11	-1.4119	0.071	0.575	4.37255e-07	14	Eid1
Lin54	1.7533e-11	-1.08729	0.119	0.636	4.43393e-07	14	Lin54
Gria1	1.83228e-11	-1.64124	0.024	0.507	4.63366e-07	14	Gria1
Cdk5r1	1.86341e-11	-1.30495	0	0.425	4.71239e-07	14	Cdk5r1
Dner	1.86341e-11	-1.31578	0	0.425	4.71239e-07	14	Dner
Chchd10	1.99674e-11	-1.25601	0	0.424	5.04956e-07	14	Chchd10
St6galnac5	2.03652e-11	-1.50298	0	0.424	5.15015e-07	14	St6galnac5
Gabbr2	2.0567e-11	-1.48777	0	0.424	5.20118e-07	14	Gabbr2
Sh3bp1	2.36055e-11	-1.21237	0	0.422	5.96959e-07	14	Sh3bp1
Apba1	2.43115e-11	-1.28234	0	0.422	6.14814e-07	14	Apba1
Nrxn1	2.77427e-11	-1.36929	0.048	0.543	7.01586e-07	14	Nrxn1
Sv2a	2.94595e-11	-1.3425	0.048	0.537	7.45002e-07	14	Sv2a
Klf4	3.11961e-11	1.94469	0.476	0.123	7.88918e-07	14	Klf4
Sulf2	3.52528e-11	-1.57633	0	0.417	8.91508e-07	14	Sulf2
Cfh	3.74685e-11	1.29103	0.381	0.042	9.47542e-07	14	Cfh
Tcf7l2	3.98582e-11	-1.7088	0.071	0.547	1.00798e-06	14	Tcf7l2
Arxes2	4.03931e-11	-1.21059	0	0.415	1.0215e-06	14	Arxes2
Tac2	4.11848e-11	-2.40742	0	0.415	1.04152e-06	14	Tac2
Gucy1a3	4.24008e-11	-1.35563	0	0.414	1.07228e-06	14	Gucy1a3
Elavl4	4.74381e-11	-1.34367	0.024	0.485	1.19966e-06	14	Elavl4
Nrsn2	4.76258e-11	-1.35223	0	0.413	1.20441e-06	14	Nrsn2
Ubl3	5.05441e-11	-1.50554	0.095	0.601	1.27821e-06	14	Ubl3
Camk2b	5.50477e-11	-1.21634	0	0.411	1.3921e-06	14	Camk2b
Map2	5.68148e-11	-0.884593	0.048	0.525	1.43679e-06	14	Map2
Stmn2	6.73673e-11	-1.39547	0	0.408	1.70365e-06	14	Stmn2
Dynll2	6.74246e-11	-1.41423	0.286	0.64	1.7051e-06	14	Dynll2
P3h1	6.81955e-11	1.23026	0.238	0.03	1.72459e-06	14	P3h1
Mfap4	7.63388e-11	0.686275	0.143	0.001	1.93053e-06	14	Mfap4
Hlf	8.6521e-11	1.37645	0.381	0.113	2.18803e-06	14	Hlf
Usp22	9.97809e-11	-1.31853	0.024	0.485	2.52336e-06	14	Usp22
Celf4	1.08136e-10	-1.30346	0.048	0.52	2.73465e-06	14	Celf4
Syt13	1.10642e-10	-1.31019	0	0.401	2.79801e-06	14	Syt13
Tspyl4	1.15263e-10	-1.38419	0.048	0.525	2.91488e-06	14	Tspyl4
Emp3	1.16063e-10	0.897031	0.238	0.01	2.93513e-06	14	Emp3
Cygb	1.16507e-10	-1.64533	0.024	0.48	2.94634e-06	14	Cygb
Rell1	1.21285e-10	1.16322	0.357	0.096	3.06718e-06	14	Rell1
Cxx1a	1.21492e-10	-1.78464	0.167	0.634	3.0724e-06	14	Cxx1a
Olfm1	1.41785e-10	-1.82563	0.071	0.546	3.58559e-06	14	Olfm1
Slc22a8	1.4291e-10	1.53	0.429	0.072	3.61406e-06	14	Slc22a8
Rap1gap	1.43749e-10	-1.43423	0.024	0.481	3.63527e-06	14	Rap1gap
Tubb4a	1.59935e-10	-1.3493	0	0.395	4.04459e-06	14	Tubb4a
Mapk8ip2	1.60322e-10	-1.37981	0.024	0.478	4.05439e-06	14	Mapk8ip2
Lama2	1.62377e-10	1.15892	0.31	0.028	4.10636e-06	14	Lama2
Sult4a1	1.8587e-10	-1.21762	0	0.393	4.70046e-06	14	Sult4a1
Gucy1b3	2.04121e-10	-1.15855	0	0.392	5.16202e-06	14	Gucy1b3
Pfn2	2.11666e-10	-1.32629	0.071	0.553	5.35282e-06	14	Pfn2
Tmem204	2.37304e-10	0.886865	0.31	0.025	6.00118e-06	14	Tmem204
Pdia3	2.6086e-10	0.852403	0.429	0.375	6.59688e-06	14	Pdia3
Ppp2r2c	2.65053e-10	-1.12754	0	0.388	6.70292e-06	14	Ppp2r2c
Aox3	2.76362e-10	1.01774	0.143	0.01	6.98892e-06	14	Aox3
Irx2	2.80256e-10	-1.25464	0	0.387	7.08739e-06	14	Irx2
Scg3	2.82871e-10	-1.1048	0	0.387	7.15354e-06	14	Scg3
Rian	2.9032e-10	-1.53704	0.024	0.471	7.34189e-06	14	Rian
Tfpi	3.06053e-10	1.27468	0.286	0.026	7.73978e-06	14	Tfpi
Lrp1	3.13746e-10	1.08066	0.69	0.31	7.93431e-06	14	Lrp1
Nptx2	3.50059e-10	-1.22427	0	0.384	8.85264e-06	14	Nptx2
Flrt3	3.62416e-10	1.27373	0.31	0.058	9.16514e-06	14	Flrt3
Slc6a6	3.7344e-10	-1.5806	0	0.383	9.44392e-06	14	Slc6a6
Nrp2	3.76902e-10	-1.22371	0	0.383	9.53148e-06	14	Nrp2
Pde2a	3.91805e-10	-1.74639	0.024	0.466	9.90835e-06	14	Pde2a
Emilin1	4.10297e-10	0.842434	0.19	0.005	1.0376e-05	14	Emilin1
Nrsn1	4.20979e-10	-1.13828	0	0.382	1.06461e-05	14	Nrsn1
Eya1	4.21325e-10	1.09809	0.214	0.031	1.06549e-05	14	Eya1
Kcnip1	4.74416e-10	-1.36137	0	0.38	1.19975e-05	14	Kcnip1
Man1a2	5.22718e-10	0.468395	0.048	0.238	1.3219e-05	14	Man1a2
Tmod2	5.24766e-10	-1.06892	0	0.378	1.32708e-05	14	Tmod2
Faim2	5.34465e-10	-1.00844	0	0.378	1.35161e-05	14	Faim2
Mfap2	6.11779e-10	0.839767	0.238	0.016	1.54713e-05	14	Mfap2
Scg2	6.30025e-10	-1.30024	0	0.376	1.59327e-05	14	Scg2
Rundc3a	6.41622e-10	-0.987738	0	0.375	1.6226e-05	14	Rundc3a
Rbp1	6.52305e-10	1.03066	0.262	0.018	1.64961e-05	14	Rbp1
Crmp1	6.53427e-10	-1.04449	0	0.375	1.65245e-05	14	Crmp1
Angpt2	7.2184e-10	1.4172	0.143	0.005	1.82546e-05	14	Angpt2
Ndrg3	7.56493e-10	-0.932454	0.048	0.478	1.9131e-05	14	Ndrg3
Snca	7.62728e-10	-1.28037	0	0.373	1.92886e-05	14	Snca
Eva1b	8.1851e-10	1.23189	0.238	0.014	2.06993e-05	14	Eva1b
Syt6	8.35168e-10	-1.18884	0	0.372	2.11206e-05	14	Syt6
Foxc2	8.38153e-10	0.467274	0.143	0.001	2.11961e-05	14	Foxc2
Ier2	8.43995e-10	1.50304	0.429	0.086	2.13438e-05	14	Ier2
Wnt4	8.74181e-10	1.04393	0.238	0.095	2.21072e-05	14	Wnt4
Fam20c	9.18902e-10	1.2683	0.262	0.054	2.32381e-05	14	Fam20c
Scrn1	9.32292e-10	-1.23226	0.024	0.452	2.35767e-05	14	Scrn1
Zcchc12	1.01676e-09	-1.55527	0.024	0.45	2.57127e-05	14	Zcchc12
Dlgap1	1.02825e-09	-1.19135	0	0.368	2.60035e-05	14	Dlgap1
Hopx	1.07567e-09	-1.18567	0	0.368	2.72027e-05	14	Hopx
Cpq	1.11339e-09	1.17775	0.381	0.059	2.81566e-05	14	Cpq
Igfbp5	1.1859e-09	1.37369	0.286	0.125	2.99902e-05	14	Igfbp5
Chgb	1.19837e-09	-1.06877	0	0.366	3.03056e-05	14	Chgb
Trim2	1.20919e-09	-1.0861	0	0.366	3.05793e-05	14	Trim2
Atp5k	1.22512e-09	-0.984145	0.071	0.526	3.09822e-05	14	Atp5k
Mllt11	1.23112e-09	-1.0138	0	0.366	3.11339e-05	14	Mllt11
Nfic	1.24248e-09	1.14426	0.429	0.252	3.1421e-05	14	Nfic
Atp6v1g1	1.36288e-09	-0.847727	0.119	0.572	3.44658e-05	14	Atp6v1g1
Ctsk	1.41533e-09	1.02952	0.19	0.009	3.57923e-05	14	Ctsk
Atp6v1g2	1.42114e-09	-1.13847	0	0.364	3.59392e-05	14	Atp6v1g2
Gdi1	1.45869e-09	-1.06921	0.167	0.646	3.68889e-05	14	Gdi1
Ywhae	1.48824e-09	-0.73685	0.333	0.778	3.76361e-05	14	Ywhae
Cend1	1.55415e-09	-1.0451	0	0.362	3.9303e-05	14	Cend1
Kdelr3	1.56993e-09	1.01735	0.143	0.002	3.97019e-05	14	Kdelr3
Tpcn1	1.58666e-09	1.32335	0.31	0.058	4.01249e-05	14	Tpcn1
Cdip1	1.62515e-09	-0.986965	0	0.362	4.10985e-05	14	Cdip1
Slc38a3	1.74003e-09	1.0756	0.381	0.053	4.40035e-05	14	Slc38a3
Foxd1	1.75056e-09	1.19598	0.19	0.006	4.427e-05	14	Foxd1
Apoe	1.76464e-09	0.78775	0.714	0.254	4.46259e-05	14	Apoe
Vav3	1.8577e-09	-1.15116	0	0.36	4.69795e-05	14	Vav3
Dpysl2	1.89246e-09	-1.15262	0.143	0.615	4.78584e-05	14	Dpysl2
Ctdspl	1.89998e-09	1.12823	0.214	0.061	4.80486e-05	14	Ctdspl
Rbms1	1.9626e-09	1.05865	0.571	0.326	4.96322e-05	14	Rbms1
Notch2	2.00827e-09	0.849298	0.286	0.024	5.07871e-05	14	Notch2
Gria2	2.11159e-09	-1.31901	0.024	0.439	5.34e-05	14	Gria2
Magee1	2.19804e-09	-0.282162	0.095	0.475	5.55863e-05	14	Magee1
Rab6a	2.19857e-09	-1.24144	0.167	0.625	5.55996e-05	14	Rab6a
Aldoa	2.2332e-09	-1.2498	0.071	0.517	5.64753e-05	14	Aldoa
Dnajb1	2.55979e-09	1.51435	0.31	0.197	6.47346e-05	14	Dnajb1
Plat	2.66751e-09	1.46452	0.452	0.125	6.74586e-05	14	Plat
Anxa2	2.79756e-09	1.03682	0.31	0.032	7.07475e-05	14	Anxa2
Nnat	2.80991e-09	-1.85072	0.048	0.471	7.10597e-05	14	Nnat
Slc41a1	2.82166e-09	0.960759	0.357	0.054	7.13568e-05	14	Slc41a1
Scoc	2.84712e-09	-1.11218	0.048	0.483	7.20009e-05	14	Scoc
Gng3	2.89824e-09	-1.00615	0.024	0.429	7.32935e-05	14	Gng3
Kif5a	2.97043e-09	-1.01854	0	0.352	7.51193e-05	14	Kif5a
Wdr6	2.99671e-09	-1.01769	0	0.352	7.57839e-05	14	Wdr6
Kif21a	3.01634e-09	-1.35343	0.024	0.429	7.62803e-05	14	Kif21a
Fam131a	3.31181e-09	0.859127	0.262	0.178	8.37524e-05	14	Fam131a
Gsn	3.32013e-09	1.40536	0.548	0.166	8.39629e-05	14	Gsn
Tex2	3.54152e-09	-0.970782	0	0.35	8.95614e-05	14	Tex2
Gng8	3.54152e-09	-1.29643	0	0.35	8.95614e-05	14	Gng8
Nfasc	3.57273e-09	-1.56503	0	0.35	9.03507e-05	14	Nfasc
Phyhipl	3.60421e-09	-1.15919	0	0.35	9.11468e-05	14	Phyhipl
Got1	3.67277e-09	-1.24956	0.048	0.477	9.28807e-05	14	Got1
Gapdh	3.72369e-09	-0.907149	0.548	0.831	9.41684e-05	14	Gapdh
Cacna2d2	3.91891e-09	-1.26481	0.024	0.434	9.91054e-05	14	Cacna2d2
Eno2	4.06352e-09	-1.16023	0.024	0.434	0.000102762	14	Eno2
Calb2	4.14635e-09	-2.08692	0	0.347	0.000104857	14	Calb2
Pianp	4.18277e-09	-0.950437	0	0.347	0.000105778	14	Pianp
Snap47	4.34487e-09	-1.06699	0.048	0.471	0.000109877	14	Snap47
Caly	4.36957e-09	-1.03879	0	0.347	0.000110502	14	Caly
Dst	4.41591e-09	-1.18692	0.048	0.476	0.000111674	14	Dst
Cbln2	4.44655e-09	-1.11676	0	0.346	0.000112449	14	Cbln2
Napb	4.45822e-09	-1.20755	0.024	0.43	0.000112744	14	Napb
Tm9sf2	4.51487e-09	0.9894	0.405	0.337	0.000114176	14	Tm9sf2
Amigo2	4.52486e-09	-1.34367	0	0.346	0.000114429	14	Amigo2
Map4	4.54644e-09	-1.12175	0.048	0.477	0.000114975	14	Map4
Slc17a6	4.56452e-09	-1.10814	0	0.346	0.000115432	14	Slc17a6
Ndufab1	4.80971e-09	-0.988452	0	0.345	0.000121633	14	Ndufab1
Btg2	4.86278e-09	1.47811	0.405	0.127	0.000122975	14	Btg2
Lpar1	4.86472e-09	1.18879	0.476	0.156	0.000123024	14	Lpar1
Amph	5.06776e-09	-1.02894	0	0.344	0.000128159	14	Amph
Cyfip2	5.30301e-09	-0.705512	0.048	0.433	0.000134108	14	Cyfip2
Emc1	5.57646e-09	-1.02222	0	0.343	0.000141023	14	Emc1
Arf3	5.77201e-09	-0.851497	0.071	0.491	0.000145968	14	Arf3
Fam171b	6.2263e-09	-1.11187	0.024	0.427	0.000157457	14	Fam171b
Bex2	6.35135e-09	-1.01523	0	0.341	0.000160619	14	Bex2
S100a11	6.6268e-09	0.935408	0.262	0.021	0.000167585	14	S100a11
Gstm1	6.76897e-09	1.15425	0.476	0.115	0.000171181	14	Gstm1
X6330403K07Rik	6.86913e-09	-1.47434	0.024	0.422	0.000173713	14	X6330403K07Rik
Reep1	7.2312e-09	-0.965766	0	0.339	0.00018287	14	Reep1
Tcn2	7.23948e-09	1.08654	0.452	0.1	0.000183079	14	Tcn2
Alg2	7.30087e-09	-1.10614	0.024	0.422	0.000184632	14	Alg2
Sncg	7.55015e-09	-1.30441	0	0.338	0.000190936	14	Sncg
Asgr1	7.72529e-09	0.788385	0.143	0.003	0.000195365	14	Asgr1
Cspg5	7.80509e-09	-2.02996	0.024	0.424	0.000197383	14	Cspg5
Dpp10	7.88509e-09	-1.16381	0.024	0.425	0.000199406	14	Dpp10
Fry	8.1631e-09	-0.927235	0.024	0.412	0.000206437	14	Fry
Fam49b	8.45773e-09	-1.24798	0.024	0.419	0.000213887	14	Fam49b
Pacsin1	8.51819e-09	-0.883571	0	0.336	0.000215417	14	Pacsin1
Jun	8.71466e-09	1.27364	0.571	0.247	0.000220385	14	Jun
Jakmip2	8.96929e-09	-0.942132	0	0.335	0.000226824	14	Jakmip2
Cnn2	9.38743e-09	1.17665	0.286	0.03	0.000237399	14	Cnn2
Lrp11	9.69005e-09	-0.990445	0	0.334	0.000245052	14	Lrp11
Slc1a3	1.02655e-08	1.16833	0.5	0.13	0.000259605	14	Slc1a3
Pdzrn3	1.03041e-08	0.709157	0.167	0.01	0.00026058	14	Pdzrn3
Twsg1	1.05814e-08	1.02572	0.333	0.126	0.000267593	14	Twsg1
Cadm2	1.11971e-08	-1.1197	0.024	0.411	0.000283163	14	Cadm2
Dnajc7	1.12627e-08	-1.11275	0.048	0.461	0.000284823	14	Dnajc7
Araf	1.12736e-08	-1.21292	0.071	0.499	0.000285097	14	Araf
Opcml	1.31038e-08	-1.2239	0.024	0.417	0.000331382	14	Opcml
Nkain3	1.40199e-08	-0.847344	0.214	0.668	0.00035455	14	Nkain3
Atp2a2	1.41838e-08	-1.25479	0.095	0.526	0.000358695	14	Atp2a2
Pcdh9	1.46013e-08	-1.13614	0	0.328	0.000369252	14	Pcdh9
Ogn	1.49369e-08	0.877989	0.167	0.005	0.000377739	14	Ogn
B3gnt9	1.55357e-08	0.922229	0.214	0.02	0.000392883	14	B3gnt9
Tubb3	1.57615e-08	-1.01105	0	0.327	0.000398594	14	Tubb3
Auh	1.57615e-08	-0.892787	0	0.327	0.000398594	14	Auh
Fto	1.58181e-08	-1.06028	0.024	0.415	0.000400024	14	Fto
Sulf1	1.64947e-08	1.2637	0.238	0.034	0.000417136	14	Sulf1
Map7d2	1.70118e-08	-0.919175	0	0.325	0.000430212	14	Map7d2
Atp6v1e1	1.71651e-08	-0.585376	0.095	0.503	0.000434089	14	Atp6v1e1
Dip2c	1.73555e-08	0.303726	0.024	0.198	0.000438904	14	Dip2c
Cmip	1.73654e-08	-1.05321	0.024	0.413	0.000439155	14	Cmip
Lhx9	1.74497e-08	-1.01905	0	0.325	0.000441286	14	Lhx9
Clstn1	1.78293e-08	-1.12214	0.19	0.627	0.000450884	14	Clstn1
Gsk3b	1.81073e-08	-0.967511	0.048	0.451	0.000457915	14	Gsk3b
Fam172a	1.81529e-08	0.579203	0.024	0.168	0.000459068	14	Fam172a
Idh3a	1.83577e-08	-0.748113	0.048	0.423	0.000464249	14	Idh3a
Tmem45a	1.89655e-08	0.948496	0.167	0.005	0.000479619	14	Tmem45a
Apbb1	1.9654e-08	-1.13114	0.071	0.485	0.00049703	14	Apbb1
Rcan2	2.11939e-08	-0.920958	0	0.322	0.000535972	14	Rcan2
Snap91	2.17368e-08	-0.939681	0	0.322	0.000549701	14	Snap91
C1qtnf2	2.19621e-08	0.767816	0.119	0.001	0.000555399	14	C1qtnf2
Txndc5	2.21959e-08	0.991693	0.262	0.15	0.000561311	14	Txndc5
Ece1	2.25334e-08	1.15114	0.357	0.121	0.000569847	14	Ece1
Resp18	2.3057e-08	-0.979085	0	0.321	0.000583088	14	Resp18
Mapk8ip3	2.37038e-08	-0.880921	0.024	0.396	0.000599445	14	Mapk8ip3
Cpne4	2.44555e-08	-1.09297	0	0.32	0.000618456	14	Cpne4
Clip3	2.44964e-08	-0.949601	0.048	0.448	0.000619488	14	Clip3
Sdc2	2.50181e-08	1.26549	0.333	0.104	0.000632682	14	Sdc2
Camk2d	2.52916e-08	-0.904522	0	0.319	0.000639599	14	Camk2d
Rps16	2.5942e-08	0.670087	0.667	0.602	0.000656048	14	Rps16
2019-09-11	2.68081e-08	0.96654	0.333	0.169	0.000677949	14	2019-09-11
Gabra2	2.68752e-08	-1.21046	0.024	0.404	0.000679647	14	Gabra2
Ndufa4	2.73003e-08	-1.09253	0.167	0.6	0.000690397	14	Ndufa4
Amotl2	2.74985e-08	1.09017	0.31	0.068	0.000695409	14	Amotl2
Irs2	2.82055e-08	0.957454	0.31	0.204	0.000713288	14	Irs2
Hspa4	2.86189e-08	-0.3536	0.095	0.443	0.000723745	14	Hspa4
Glud1	2.91894e-08	-0.77436	0.095	0.503	0.000738172	14	Glud1
Ghitm	2.9413e-08	-1.14947	0.143	0.577	0.000743826	14	Ghitm
Ptgis	2.98764e-08	0.797402	0.143	0.004	0.000755543	14	Ptgis
Nap1l5	2.99095e-08	-1.91673	0	0.316	0.000756382	14	Nap1l5
Vdac1	2.999e-08	-1.03943	0.095	0.522	0.000758416	14	Vdac1
Nek7	3.0321e-08	-1.19991	0.071	0.487	0.000766787	14	Nek7
Cyb5b	3.04714e-08	-0.336976	0.048	0.354	0.000770591	14	Cyb5b
Tmem179	3.09274e-08	-0.849918	0	0.316	0.000782124	14	Tmem179
Gpx8	3.09772e-08	0.983206	0.238	0.018	0.000783381	14	Gpx8
Cltb	3.10772e-08	-0.470318	0.071	0.418	0.000785912	14	Cltb
Nrcam	3.19792e-08	-0.918307	0	0.315	0.000808723	14	Nrcam
Srp54b	3.20097e-08	-0.980473	0.071	0.483	0.000809493	14	Srp54b
Ilf2	3.22476e-08	-0.821856	0	0.315	0.000815509	14	Ilf2
Tceal3	3.27909e-08	-0.798797	0	0.315	0.00082925	14	Tceal3
Cycs	3.40544e-08	-0.977053	0.024	0.403	0.000861203	14	Cycs
Kpnb1	3.45868e-08	-0.84691	0.024	0.386	0.000874665	14	Kpnb1
Enpp5	3.47641e-08	-0.895019	0	0.314	0.000879149	14	Enpp5
Cd164	3.55117e-08	1.21958	0.524	0.228	0.000898055	14	Cd164
Vstm2b	3.62441e-08	-0.894653	0	0.313	0.000916577	14	Vstm2b
Sh3bgrl2	3.68532e-08	-0.97619	0	0.313	0.000931981	14	Sh3bgrl2
Cdk14	3.98429e-08	-0.796511	0.048	0.428	0.00100759	14	Cdk14
Nedd8	4.12915e-08	-0.29778	0.119	0.486	0.00104422	14	Nedd8
Cbr1	4.16281e-08	0.397547	0.071	0.19	0.00105273	14	Cbr1
Hint1	4.20405e-08	-0.400541	0.19	0.588	0.00106316	14	Hint1
Atp6v1b2	4.28913e-08	-1.05007	0.119	0.548	0.00108468	14	Atp6v1b2
Sv2b	4.31248e-08	-1.16052	0.024	0.394	0.00109058	14	Sv2b
Sfxn1	4.57435e-08	-0.887765	0	0.31	0.00115681	14	Sfxn1
Atxn10	4.69009e-08	-0.612884	0.095	0.474	0.00118608	14	Atxn10
Cplx1	4.70136e-08	-1.59525	0.024	0.398	0.00118893	14	Cplx1
Ndn	4.70608e-08	-1.30264	0.143	0.564	0.00119012	14	Ndn
Ywhah	4.81138e-08	-1.27812	0.095	0.514	0.00121675	14	Ywhah
Ppp2ca	4.84545e-08	-0.752144	0.167	0.585	0.00122537	14	Ppp2ca
Dpy30	4.87458e-08	0.50478	0.024	0.166	0.00123273	14	Dpy30
Gdap1	4.96946e-08	-0.841661	0	0.308	0.00125673	14	Gdap1
Smo	5.09308e-08	0.979214	0.238	0.021	0.00128799	14	Smo
Gpr108	5.11026e-08	1.11253	0.262	0.137	0.00129233	14	Gpr108
Itm2b	5.15117e-08	0.563641	0.952	0.865	0.00130268	14	Itm2b
Marveld1	5.25091e-08	1.35958	0.286	0.056	0.0013279	14	Marveld1
Ywhaq	5.5128e-08	-1.05739	0.238	0.668	0.00139413	14	Ywhaq
Zfp36l1	5.55379e-08	1.07208	0.524	0.146	0.0014045	14	Zfp36l1
Nsf	5.58137e-08	-0.9944	0.048	0.439	0.00141147	14	Nsf
Ahcyl2	5.62544e-08	-0.797095	0	0.306	0.00142262	14	Ahcyl2
X1500009C09Rik	5.71907e-08	-0.849618	0	0.306	0.00144629	14	X1500009C09Rik
Armcx2	5.91848e-08	0.531902	0.119	0.249	0.00149672	14	Armcx2
Gstt1	5.96926e-08	1.02239	0.214	0.018	0.00150957	14	Gstt1
Rufy3	6.24163e-08	-0.936622	0.024	0.392	0.00157845	14	Rufy3
Akap12	6.3753e-08	1.22023	0.357	0.075	0.00161225	14	Akap12
Tm4sf1	6.43371e-08	0.772579	0.333	0.055	0.00162702	14	Tm4sf1
Dnajc5	6.58908e-08	-1.01002	0.024	0.393	0.00166631	14	Dnajc5
Nptx1	6.79892e-08	-0.950496	0	0.303	0.00171938	14	Nptx1
Prkar1b	7.12101e-08	-1.08012	0.048	0.436	0.00180083	14	Prkar1b
Chst1	7.13031e-08	-1.10054	0.024	0.389	0.00180318	14	Chst1
Crispld2	7.2576e-08	1.0641	0.167	0.009	0.00183538	14	Crispld2
Vimp	7.2782e-08	1.11735	0.429	0.281	0.00184058	14	Vimp
Lsamp	7.46845e-08	-1.02694	0.048	0.433	0.0018887	14	Lsamp
Ppp1r15a	7.75941e-08	1.53308	0.405	0.121	0.00196228	14	Ppp1r15a
Ifitm1	7.83167e-08	0.811836	0.214	0.016	0.00198055	14	Ifitm1
Dynlt3	7.98945e-08	-0.390992	0.024	0.311	0.00202045	14	Dynlt3
Chrnb4	8.07742e-08	-1.06571	0	0.3	0.0020427	14	Chrnb4
Kctd8	8.07742e-08	-0.919497	0	0.3	0.0020427	14	Kctd8
Nhlh2	8.27828e-08	-0.925676	0	0.3	0.0020935	14	Nhlh2
Kif1bp	8.47102e-08	0.513386	0.143	0.427	0.00214224	14	Kif1bp
Cxx1b	8.50231e-08	-0.983057	0.024	0.389	0.00215015	14	Cxx1b
Sox9	9.11662e-08	1.07449	0.333	0.051	0.0023055	14	Sox9
Tuba1a	9.14844e-08	-1.10219	0.595	0.821	0.00231355	14	Tuba1a
Usp9x	9.16589e-08	-0.492037	0.048	0.395	0.00231796	14	Usp9x
Sipa1l2	9.20662e-08	-0.928856	0	0.298	0.00232826	14	Sipa1l2
Mtss1l	9.28211e-08	-0.941815	0	0.298	0.00234735	14	Mtss1l
Rnf11	9.31155e-08	-0.700855	0.048	0.41	0.0023548	14	Rnf11
Atrnl1	9.35422e-08	0.758573	0.167	0.096	0.00236559	14	Atrnl1
Syngr3	9.45742e-08	-1.21656	0.048	0.428	0.00239169	14	Syngr3
Mapk1	9.51361e-08	-0.547784	0.071	0.444	0.0024059	14	Mapk1
Fez1	9.63574e-08	-1.31337	0.024	0.386	0.00243678	14	Fez1
Sec61b	9.67938e-08	0.89902	0.238	0.159	0.00244782	14	Sec61b
Lhfpl4	9.82773e-08	-0.820458	0	0.297	0.00248533	14	Lhfpl4
Arf4	1.03302e-07	0.853383	0.405	0.339	0.00261241	14	Arf4
Astn1	1.04898e-07	-0.836525	0	0.296	0.00265276	14	Astn1
Chst10	1.05755e-07	-0.810757	0	0.296	0.00267445	14	Chst10
Ctnnd2	1.09255e-07	-0.891589	0	0.295	0.00276295	14	Ctnnd2
Ank2	1.09862e-07	-0.861622	0.119	0.526	0.00277831	14	Ank2
Noct	1.13014e-07	-0.754647	0.095	0.486	0.00285802	14	Noct
Celf3	1.13789e-07	-0.865954	0	0.295	0.00287762	14	Celf3
Tubb2b	1.15654e-07	-1.41906	0	0.294	0.00292477	14	Tubb2b
Trappc2	1.16316e-07	-0.964774	0.024	0.383	0.00294151	14	Trappc2
Phb	1.18353e-07	0.483623	0.071	0.132	0.00299304	14	Phb
Irf2bp1	1.19179e-07	0.55173	0.071	0.138	0.00301391	14	Irf2bp1
Axl	1.24007e-07	1.10328	0.286	0.038	0.00313602	14	Axl
Gfra1	1.24563e-07	-1.34339	0.048	0.423	0.00315007	14	Gfra1
Adam11	1.26457e-07	-0.860237	0	0.293	0.00319797	14	Adam11
Ptges	1.27414e-07	0.944325	0.143	0.01	0.00322218	14	Ptges
Ap3b2	1.28525e-07	-0.781614	0	0.293	0.00325026	14	Ap3b2
Dync1li1	1.33839e-07	-0.736742	0	0.292	0.00338467	14	Dync1li1
Dusp8	1.38246e-07	-0.788674	0	0.292	0.00349609	14	Dusp8
Etnk1	1.41311e-07	-0.75181	0.119	0.52	0.00357363	14	Etnk1
Klf2	1.46085e-07	1.18426	0.405	0.09	0.00369435	14	Klf2
Lrrc4b	1.48684e-07	-0.815737	0	0.29	0.00376008	14	Lrrc4b
Rbfox3	1.52333e-07	-0.969025	0	0.29	0.00385234	14	Rbfox3
Wbp2	1.53631e-07	-0.80551	0.143	0.554	0.00388518	14	Wbp2
Spry1	1.58231e-07	1.0317	0.262	0.034	0.0040015	14	Spry1
Zwint	1.59113e-07	-0.822035	0.119	0.519	0.00402381	14	Zwint
Arhgef9	1.62494e-07	-0.767292	0	0.289	0.00410932	14	Arhgef9
Pafah1b1	1.6508e-07	-0.760832	0.167	0.571	0.00417472	14	Pafah1b1
Kcnd2	1.65137e-07	-0.892095	0	0.289	0.00417614	14	Kcnd2
Fam26e	1.67182e-07	0.646636	0.143	0.028	0.00422787	14	Fam26e
Jph4	1.73318e-07	-0.768082	0	0.288	0.00438304	14	Jph4
P4ha1	1.76285e-07	1.1608	0.238	0.156	0.00445808	14	P4ha1
Ufc1	1.77096e-07	0.444749	0.19	0.278	0.00447858	14	Ufc1
Gabrb3	1.80438e-07	-0.808448	0	0.287	0.0045631	14	Gabrb3
Syt7	1.80438e-07	-0.894452	0	0.287	0.0045631	14	Syt7
Necab3	1.81896e-07	-1.07778	0	0.287	0.00459997	14	Necab3
Ldhb	1.8222e-07	-1.08266	0.143	0.556	0.00460815	14	Ldhb
Itga3	1.91673e-07	0.734807	0.238	0.139	0.00484722	14	Itga3
Arl8a	1.93103e-07	-0.640141	0.143	0.53	0.00488339	14	Arl8a
Grin3a	2.01931e-07	-0.908342	0	0.285	0.00510663	14	Grin3a
Kitl	2.03559e-07	-1.01911	0	0.285	0.0051478	14	Kitl
Tmx4	2.0565e-07	-1.02614	0.095	0.494	0.00520068	14	Tmx4
Ppa1	2.10178e-07	-0.294194	0.048	0.319	0.00531519	14	Ppa1
Wdr1	2.16157e-07	-0.471508	0.071	0.42	0.00546638	14	Wdr1
Fam43a	2.16522e-07	1.05271	0.19	0.021	0.00547563	14	Fam43a
Bmp2	2.18163e-07	1.07481	0.167	0.014	0.00551712	14	Bmp2
Rangap1	2.27807e-07	-1.05283	0.024	0.374	0.00576102	14	Rangap1
Taok1	2.31222e-07	-0.907436	0.095	0.487	0.00584738	14	Taok1
Abr	2.40511e-07	-0.434995	0.095	0.428	0.00608228	14	Abr
Cacnb4	2.40862e-07	-0.851981	0	0.282	0.00609115	14	Cacnb4
Arl2bp	2.45498e-07	-0.867987	0.119	0.52	0.0062084	14	Arl2bp
Wdfy1	2.47327e-07	-0.706089	0.024	0.346	0.00625465	14	Wdfy1
Hmgcs1	2.50195e-07	-1.33825	0.024	0.369	0.00632717	14	Hmgcs1
Calr	2.50618e-07	0.605436	0.452	0.575	0.00633788	14	Calr
Dcaf12l1	2.52696e-07	-0.841962	0	0.281	0.00639043	14	Dcaf12l1
Bnip3l	2.5299e-07	-0.270742	0.238	0.609	0.00639786	14	Bnip3l
Hprt	2.55535e-07	-0.971547	0.048	0.417	0.00646223	14	Hprt
Rhob	2.5593e-07	0.956619	0.619	0.311	0.00647221	14	Rhob
Gpr151	2.58613e-07	-1.69044	0.024	0.369	0.00654006	14	Gpr151
Atp6v0a1	2.59962e-07	-0.931063	0.048	0.417	0.00657418	14	Atp6v0a1
Dync1i2	2.61279e-07	-0.273121	0.095	0.442	0.00660748	14	Dync1i2
Clec3b	2.66613e-07	0.737445	0.19	0.012	0.00674239	14	Clec3b
Psip1	2.72853e-07	-0.855381	0.095	0.48	0.00690018	14	Psip1
Tns2	2.7438e-07	1.05792	0.262	0.033	0.00693879	14	Tns2
Klf9	2.75406e-07	0.945494	0.333	0.218	0.00696474	14	Klf9
Fbxo3	2.76513e-07	-0.645033	0.024	0.333	0.00699274	14	Fbxo3
Fstl1	2.80682e-07	0.883527	0.381	0.209	0.00709817	14	Fstl1
Plekhb2	2.81878e-07	-0.828962	0.095	0.479	0.00712841	14	Plekhb2
Tmsb4x	2.93677e-07	-1.52087	0.571	0.867	0.00742679	14	Tmsb4x
Hhip	2.9911e-07	-1.29892	0.024	0.368	0.0075642	14	Hhip
Agtpbp1	3.08435e-07	-0.743208	0	0.278	0.0078	14	Agtpbp1
Clstn3	3.18404e-07	-0.795023	0	0.278	0.00805213	14	Clstn3
Syn1	3.20946e-07	-0.76358	0	0.277	0.0081164	14	Syn1
Uqcrc2	3.21187e-07	-0.658952	0.095	0.471	0.00812251	14	Uqcrc2
Ndufs1	3.22982e-07	-0.613371	0.024	0.331	0.00816789	14	Ndufs1
Atp6v1f	3.24439e-07	-0.688531	0.119	0.499	0.00820474	14	Atp6v1f
Pak1	3.28689e-07	-0.886896	0	0.277	0.00831223	14	Pak1
P2ry1	3.29688e-07	1.12256	0.167	0.02	0.00833749	14	P2ry1
Atp1b3	3.3229e-07	0.917587	0.5	0.443	0.00840328	14	Atp1b3
Nlgn3	3.36616e-07	-0.830564	0	0.277	0.00851268	14	Nlgn3
Nono	3.36807e-07	-1.00344	0.071	0.45	0.00851751	14	Nono
Dync1h1	3.38035e-07	-0.772146	0.071	0.431	0.00854856	14	Dync1h1
Plekha6	3.38042e-07	0.71771	0.119	0.207	0.00854873	14	Plekha6
Erc2	3.42004e-07	-0.853577	0	0.276	0.00864893	14	Erc2
Gm5741	3.47476e-07	-1.05134	0	0.276	0.00878732	14	Gm5741
Sphkap	3.55845e-07	-1.05095	0	0.276	0.00899897	14	Sphkap
Ppme1	3.58238e-07	-0.308122	0.048	0.316	0.00905949	14	Ppme1
Pias3	3.58525e-07	0.76778	0.167	0.107	0.00906674	14	Pias3
Pfdn2	3.61273e-07	-0.829683	0.048	0.4	0.00913622	14	Pfdn2
Mme	3.64856e-07	-0.917069	0.214	0.626	0.00922685	14	Mme
Pou4f1	3.66181e-07	-1.01326	0.048	0.407	0.00926036	14	Pou4f1
Rnf208	3.70235e-07	-0.708496	0	0.275	0.00936286	14	Rnf208
Actr2	3.76894e-07	-0.622624	0.071	0.423	0.00953128	14	Actr2
Cmas	3.7914e-07	-0.823642	0	0.275	0.00958807	14	Cmas
Ywhag	3.95931e-07	-1.12172	0.167	0.568	0.0100127	14	Ywhag
Pak3	3.9791e-07	-0.828033	0.024	0.355	0.0100628	14	Pak3
Mapk10	4.02345e-07	-0.885711	0.024	0.363	0.0101749	14	Mapk10
Phkg1	4.03729e-07	-0.625729	0.143	0.521	0.0102099	14	Phkg1
Fkbp4	4.10261e-07	-1.00403	0.048	0.408	0.0103751	14	Fkbp4
Disp2	4.16905e-07	-0.818177	0	0.273	0.0105431	14	Disp2
Tmem163	4.16905e-07	-0.969781	0	0.273	0.0105431	14	Tmem163
Frmd6	4.19728e-07	1.00444	0.238	0.111	0.0106145	14	Frmd6
Trim8	4.20941e-07	0.493199	0.19	0.28	0.0106452	14	Trim8
Atp1a1	4.21207e-07	-0.500669	0.214	0.594	0.0106519	14	Atp1a1
Gem	4.25867e-07	1.27059	0.238	0.025	0.0107697	14	Gem
Cox4i1	4.27065e-07	-0.775528	0.238	0.647	0.0108	14	Cox4i1
Dmxl2	4.27535e-07	0.252832	0.048	0.262	0.0108119	14	Dmxl2
X1810026J23Rik	4.29633e-07	0.91381	0.119	0.186	0.010865	14	X1810026J23Rik
Dhx36	4.33705e-07	-0.733432	0	0.272	0.010968	14	Dhx36
Dnajc9	4.34345e-07	0.400997	0.071	0.193	0.0109842	14	Dnajc9
Dbn1	4.44102e-07	-0.729357	0	0.272	0.0112309	14	Dbn1
Nbl1	4.51109e-07	1.1821	0.333	0.06	0.0114081	14	Nbl1
Sccpdh	4.51168e-07	-0.829843	0	0.272	0.0114096	14	Sccpdh
Pkm	4.59046e-07	-0.960507	0.262	0.655	0.0116088	14	Pkm
Pkia	4.60257e-07	-0.851305	0.024	0.352	0.0116394	14	Pkia
Khdrbs3	4.80548e-07	-0.782358	0	0.271	0.0121526	14	Khdrbs3
Fgl2	4.8443e-07	0.561999	0.143	0.005	0.0122507	14	Fgl2
Ola1	4.95932e-07	-0.719823	0	0.27	0.0125416	14	Ola1
Mlf2	4.97588e-07	-0.642625	0.143	0.524	0.0125835	14	Mlf2
Plch2	5.28161e-07	-1.10132	0	0.269	0.0133567	14	Plch2
Nkx6.1	5.36177e-07	0.452374	0.119	0.002	0.0135594	14	Nkx6.1
Ncs1	5.36533e-07	-0.679206	0	0.269	0.0135684	14	Ncs1
Tulp4	5.38761e-07	-0.748637	0.071	0.431	0.0136247	14	Tulp4
Atp8a1	5.40768e-07	-1.01429	0	0.269	0.0136755	14	Atp8a1
Engase	5.49213e-07	0.90461	0.167	0.031	0.0138891	14	Engase
Setd3	5.56325e-07	-0.781903	0.024	0.347	0.0140689	14	Setd3
Tppp	5.58036e-07	-1.00092	0	0.268	0.0141122	14	Tppp
Anp32a	5.60473e-07	-0.621645	0.024	0.326	0.0141738	14	Anp32a
Tagln3	5.71566e-07	-0.870701	0.024	0.351	0.0144543	14	Tagln3
Ly6h	5.73624e-07	-0.902135	0.024	0.358	0.0145064	14	Ly6h
Tecpr1	5.76058e-07	-0.895879	0.024	0.358	0.0145679	14	Tecpr1
Mff	5.80456e-07	-0.739169	0.095	0.463	0.0146792	14	Mff
Mzt1	5.81334e-07	-0.742929	0.024	0.339	0.0147013	14	Mzt1
Ppp1r9a	5.89563e-07	-0.776383	0	0.267	0.0149095	14	Ppp1r9a
BC051077	5.9805e-07	-0.632715	0.071	0.416	0.0151241	14	BC051077
Sez6l2	5.99166e-07	-1.02057	0.024	0.357	0.0151523	14	Sez6l2
Ccnd3	6.13896e-07	1.03487	0.286	0.111	0.0155248	14	Ccnd3
Tmem35	6.27731e-07	-0.887218	0	0.266	0.0158747	14	Tmem35
Il33	6.31932e-07	0.71123	0.214	0.021	0.0159809	14	Il33
Tcaf1	6.41594e-07	-1.10193	0.095	0.474	0.0162253	14	Tcaf1
Aldoc	6.47712e-07	-1.45398	0	0.266	0.01638	14	Aldoc
Dcdc2a	6.4892e-07	0.99701	0.143	0.027	0.0164105	14	Dcdc2a
Pin1	6.52946e-07	-0.583505	0.024	0.319	0.0165123	14	Pin1
Ogdh	6.56458e-07	-0.847306	0.071	0.441	0.0166012	14	Ogdh
Creb3l1	6.6841e-07	0.858084	0.167	0.016	0.0169034	14	Creb3l1
Slc19a1	6.6943e-07	1.16117	0.286	0.085	0.0169292	14	Slc19a1
Tmx2	6.86384e-07	-0.455396	0.119	0.47	0.017358	14	Tmx2
Pcnx	7.05923e-07	-0.771493	0	0.264	0.0178521	14	Pcnx
Tril	7.23575e-07	0.953951	0.381	0.083	0.0182985	14	Tril
Syne1	7.31221e-07	-1.25956	0.071	0.43	0.0184918	14	Syne1
Chrna3	7.39802e-07	-0.871804	0	0.263	0.0187089	14	Chrna3
Got2	7.41746e-07	-0.810784	0.048	0.393	0.018758	14	Got2
Tmem178b	7.63267e-07	-0.760686	0	0.263	0.0193023	14	Tmem178b
Idh3b	7.72228e-07	-0.553254	0.095	0.448	0.0195289	14	Idh3b
Ints3	7.74055e-07	-0.969872	0.024	0.349	0.0195751	14	Ints3
Celf6	7.81342e-07	-0.803179	0	0.262	0.0197594	14	Celf6
Kcnmb4	7.81342e-07	-1.124	0	0.262	0.0197594	14	Kcnmb4
Trappc10	7.8478e-07	0.327814	0.024	0.153	0.0198463	14	Trappc10
Stk39	7.8746e-07	-0.709852	0	0.262	0.0199141	14	Stk39
Pitpna	7.92339e-07	-0.708721	0.071	0.421	0.0200375	14	Pitpna
Rab6b	7.95284e-07	-0.925165	0.024	0.351	0.0201119	14	Rab6b
Aff4	7.97962e-07	-0.31598	0.119	0.424	0.0201797	14	Aff4
Cul4a	8.11116e-07	-0.658806	0.19	0.576	0.0205123	14	Cul4a
Ctsh	8.20998e-07	0.799558	0.357	0.074	0.0207622	14	Ctsh
Galnt16	8.25162e-07	-0.712173	0	0.261	0.0208675	14	Galnt16
Tmem63b	8.28666e-07	-0.924293	0.024	0.351	0.0209561	14	Tmem63b
Copz2	8.31488e-07	0.787434	0.214	0.037	0.0210275	14	Copz2
Sytl2	8.44671e-07	-0.698934	0	0.261	0.0213609	14	Sytl2
Clcn3	8.56314e-07	-0.821174	0.095	0.464	0.0216553	14	Clcn3
Kcna2	8.57403e-07	-0.981866	0.024	0.352	0.0216829	14	Kcna2
Gnb1	8.57758e-07	-0.319693	0.214	0.577	0.0216918	14	Gnb1
Srp9	8.69431e-07	0.525781	0.238	0.35	0.021987	14	Srp9
Aak1	8.71385e-07	-0.670291	0	0.26	0.0220365	14	Aak1
A2m	8.71794e-07	0.613915	0.167	0.009	0.0220468	14	A2m
Rarres2	8.90968e-07	0.875808	0.214	0.021	0.0225317	14	Rarres2
Rab5a	8.95351e-07	-0.608481	0.048	0.362	0.0226425	14	Rab5a
Susd4	8.98927e-07	-0.703917	0	0.26	0.022733	14	Susd4
Hnrnpab	9.06308e-07	-0.645185	0.095	0.445	0.0229196	14	Hnrnpab
Tspan3	9.11055e-07	-0.906393	0.286	0.681	0.0230397	14	Tspan3
Nlgn2	9.17687e-07	-0.463056	0.048	0.362	0.0232074	14	Nlgn2
Twist1	9.25551e-07	0.877529	0.119	0.003	0.0234062	14	Twist1
Cnih1	9.46117e-07	0.388703	0.167	0.394	0.0239264	14	Cnih1
Spry4	9.47289e-07	0.865275	0.167	0.072	0.023956	14	Spry4
Stmn4	9.49188e-07	-1.2348	0	0.259	0.024004	14	Stmn4
Vmp1	9.53454e-07	-0.474913	0.024	0.295	0.0241119	14	Vmp1
Rab34	9.62968e-07	1.14851	0.214	0.063	0.0243525	14	Rab34
Fth1	9.63882e-07	0.482768	0.929	0.831	0.0243756	14	Fth1
Elfn1	9.64047e-07	-0.751652	0	0.259	0.0243798	14	Elfn1
Atp6v0e2	9.69194e-07	-0.869057	0.024	0.35	0.02451	14	Atp6v0e2
Cthrc1	9.94686e-07	1.08666	0.19	0.052	0.0251546	14	Cthrc1
Tiparp	9.97612e-07	1.21877	0.238	0.06	0.0252286	14	Tiparp
Ccdc92	1.0022e-06	-0.666849	0	0.258	0.0253446	14	Ccdc92
Kcnd3	1.01787e-06	-0.783838	0	0.258	0.0257409	14	Kcnd3
Aatk	1.03378e-06	-0.943714	0	0.258	0.0261432	14	Aatk
Grsf1	1.04076e-06	-0.881	0.024	0.349	0.0263198	14	Grsf1
Mat2a	1.04433e-06	0.344134	0.286	0.462	0.0264101	14	Mat2a
Top1	1.05682e-06	0.314833	0.143	0.343	0.026726	14	Top1
Bin1	1.06368e-06	-0.83076	0.071	0.43	0.0268995	14	Bin1
Extl2	1.08624e-06	-0.88863	0.024	0.345	0.02747	14	Extl2
X2900011O08Rik	1.09141e-06	-0.722893	0	0.257	0.0276006	14	X2900011O08Rik
Tnfrsf1a	1.09295e-06	0.982213	0.31	0.053	0.0276397	14	Tnfrsf1a
Eif4b	1.10457e-06	-0.760225	0.071	0.414	0.0279335	14	Eif4b
Ap2b1	1.1069e-06	-0.904783	0.048	0.392	0.0279925	14	Ap2b1
Plekhh2	1.11524e-06	1.01317	0.167	0.02	0.0282034	14	Plekhh2
Prelid1	1.12447e-06	0.268536	0.19	0.354	0.0284367	14	Prelid1
Ndufa12	1.12528e-06	0.256909	0.119	0.25	0.0284571	14	Ndufa12
Glul	1.13988e-06	0.794238	0.69	0.423	0.0288264	14	Glul
Tesc	1.17014e-06	-0.755297	0	0.255	0.0295916	14	Tesc
Galnt13	1.20689e-06	-0.726147	0	0.255	0.030521	14	Galnt13
Slc17a7	1.23519e-06	-0.744325	0	0.254	0.0312367	14	Slc17a7
Fbxo2	1.25442e-06	-0.72982	0	0.254	0.031723	14	Fbxo2
Cd63	1.25679e-06	0.78509	0.571	0.431	0.0317831	14	Cd63
Arnt2	1.27364e-06	0.380507	0.167	0.331	0.0322091	14	Arnt2
Insig1	1.28919e-06	0.297782	0.071	0.212	0.0326023	14	Insig1
Fis1	1.30378e-06	-0.700764	0	0.253	0.0329713	14	Fis1
Fam155a	1.31388e-06	-0.751325	0	0.253	0.0332267	14	Fam155a
Cacng7	1.31388e-06	-0.782231	0	0.253	0.0332267	14	Cacng7
Vdac2	1.31683e-06	-0.738061	0.19	0.579	0.0333014	14	Vdac2
Hmgn3	1.32154e-06	0.477241	0.167	0.272	0.0334205	14	Hmgn3
Epha3	1.33102e-06	0.61682	0.143	0.02	0.0336603	14	Epha3
Cacng4	1.37616e-06	-0.529248	0.024	0.296	0.0348016	14	Cacng4
Srp14	1.42501e-06	-0.457681	0.143	0.485	0.036037	14	Srp14
Mgll	1.43014e-06	-0.898893	0	0.252	0.0361667	14	Mgll
Thbs1	1.43098e-06	0.813046	0.143	0.007	0.036188	14	Thbs1
Fkbp10	1.44459e-06	0.54672	0.143	0.006	0.0365322	14	Fkbp10
Mphosph8	1.45233e-06	-0.695495	0	0.252	0.036728	14	Mphosph8
Dbndd2	1.49774e-06	-0.9945	0	0.251	0.0378763	14	Dbndd2
Unc80	1.49774e-06	-0.672966	0	0.251	0.0378763	14	Unc80
Btf3	1.50882e-06	0.442697	0.405	0.549	0.0381564	14	Btf3
Dock3	1.52096e-06	-0.664078	0	0.251	0.0384635	14	Dock3
Hnrnpr	1.5337e-06	-0.391832	0.071	0.359	0.0387856	14	Hnrnpr
Stox2	1.54453e-06	-0.750943	0	0.251	0.0390596	14	Stox2
Mapre2	1.54486e-06	-0.885411	0.095	0.462	0.0390679	14	Mapre2
Arl3	1.56491e-06	-0.409747	0.024	0.279	0.039575	14	Arl3
Omg	1.56846e-06	-0.954818	0	0.25	0.0396648	14	Omg
Zfp706	1.57526e-06	-0.510219	0.143	0.5	0.0398368	14	Zfp706
Tnr	1.57938e-06	-0.989001	0.024	0.33	0.0399411	14	Tnr
X1500011B03Rik	1.61274e-06	-0.541028	0.048	0.345	0.0407845	14	X1500011B03Rik
Gnl3l	1.65475e-06	-0.847414	0.071	0.422	0.041847	14	Gnl3l
Dtna	1.65511e-06	-0.74602	0	0.249	0.0418561	14	Dtna
Dnajb6	1.67339e-06	-0.367904	0.143	0.459	0.0423183	14	Dnajb6
Atp6v1c1	1.68977e-06	-0.879152	0.048	0.386	0.0427326	14	Atp6v1c1
Nmnat2	1.69367e-06	-0.691574	0	0.249	0.0428311	14	Nmnat2
Rasl10b	1.71986e-06	-0.632399	0	0.249	0.0434934	14	Rasl10b
Gm13889	1.7331e-06	-0.928548	0	0.249	0.0438283	14	Gm13889
Trove2	1.7331e-06	-0.730358	0	0.249	0.0438283	14	Trove2
Nsg1	1.74133e-06	-0.871676	0.048	0.382	0.0440364	14	Nsg1
Spag9	1.74817e-06	-0.674463	0.095	0.438	0.0442096	14	Spag9
Btg1	1.75613e-06	0.828469	0.5	0.262	0.0444108	14	Btg1
Enah	1.84105e-06	-0.65005	0.048	0.363	0.0465584	14	Enah
Dusp26	1.8427e-06	-0.774673	0	0.247	0.0466001	14	Dusp26
Tmem56	1.84295e-06	-0.97773	0.024	0.335	0.0466064	14	Tmem56
Maf	1.85128e-06	0.974372	0.381	0.091	0.0468171	14	Maf
Cacna1e	1.85907e-06	-0.778051	0.024	0.331	0.0470139	14	Cacna1e
Prkar2a	1.89223e-06	-1.09064	0.071	0.423	0.0478526	14	Prkar2a
Dzank1	1.90002e-06	-0.661273	0	0.247	0.0480497	14	Dzank1
Pafah1b2	1.90846e-06	-0.822831	0.024	0.337	0.048263	14	Pafah1b2
Il1r1	1.91872e-06	0.971794	0.143	0.01	0.0485226	14	Il1r1
Snai1	1.92308e-06	0.559136	0.143	0.008	0.0486327	14	Snai1
Ier5	1.96193e-06	0.985574	0.452	0.175	0.0496151	14	Ier5
Slc38a1	1.97225e-06	-0.867551	0.024	0.338	0.0498762	14	Slc38a1
Arxes1	1.97413e-06	-0.655588	0	0.246	0.0499238	14	Arxes1
Tgm2	1.98007e-06	1.0431	0.286	0.052	0.050074	14	Tgm2
Impad1	1.99006e-06	-0.352087	0.095	0.383	0.0503265	14	Impad1
Timm8b	1.99564e-06	-0.505265	0.071	0.381	0.0504677	14	Timm8b
Actr3	1.99637e-06	-0.715128	0.071	0.401	0.0504863	14	Actr3
Bend6	2.01995e-06	-0.663797	0	0.246	0.0510824	14	Bend6
Acly	2.02372e-06	-0.860999	0.024	0.337	0.0511779	14	Acly
Lamp2	2.02893e-06	1.09044	0.429	0.218	0.0513097	14	Lamp2
Becn1	2.02996e-06	0.370196	0.119	0.235	0.0513358	14	Becn1
Grina	2.09508e-06	-0.84763	0.119	0.489	0.0529825	14	Grina
Rtn4	2.10486e-06	-0.863898	0.31	0.684	0.0532299	14	Rtn4
BC005624	2.11472e-06	-0.682997	0	0.245	0.0534792	14	BC005624
Nr4a2	2.12426e-06	-1.46004	0.095	0.436	0.0537205	14	Nr4a2
Epha5	2.13094e-06	-0.718173	0	0.245	0.0538892	14	Epha5
Prpf19	2.14997e-06	-0.686884	0.024	0.317	0.0543706	14	Prpf19
Samd14	2.16373e-06	-0.676325	0	0.245	0.0547186	14	Samd14
Plppr4	2.18031e-06	-0.78477	0	0.245	0.0551379	14	Plppr4
Dctn1	2.18316e-06	-0.596776	0.119	0.469	0.05521	14	Dctn1
Rgs4	2.24789e-06	-0.869254	0	0.244	0.0568469	14	Rgs4
Tmem176a	2.24971e-06	-0.364276	0.024	0.265	0.0568929	14	Tmem176a
Arl4a	2.29134e-06	1.00531	0.333	0.135	0.0579458	14	Arl4a
Fyn	2.38926e-06	-1.24983	0	0.243	0.060422	14	Fyn
Htra3	2.39645e-06	0.955096	0.167	0.019	0.0606038	14	Htra3
Car10	2.44524e-06	-0.830786	0.024	0.333	0.0618377	14	Car10
Ssr2	2.44591e-06	0.850552	0.333	0.169	0.0618546	14	Ssr2
Scn8a	2.46317e-06	-0.681561	0	0.242	0.0622912	14	Scn8a
Rps15a	2.47062e-06	0.250757	0.381	0.568	0.0624795	14	Rps15a
Lrp8	2.52008e-06	-0.725233	0	0.242	0.0637302	14	Lrp8
Cd200	2.57826e-06	-0.70414	0	0.242	0.0652017	14	Cd200
Ugcg	2.60804e-06	0.387285	0.048	0.201	0.0659547	14	Ugcg
Tcf25	2.61184e-06	-0.57504	0.19	0.55	0.0660507	14	Tcf25
Npr1	2.61778e-06	-0.751181	0	0.241	0.0662011	14	Npr1
Nptxr	2.61899e-06	-0.888035	0.048	0.355	0.0662317	14	Nptxr
Ensa	2.65447e-06	-0.773705	0.048	0.371	0.0671289	14	Ensa
Snhg11	2.67701e-06	-1.33447	0.238	0.564	0.0676989	14	Snhg11
Rap1gap2	2.67818e-06	-0.73685	0	0.241	0.0677284	14	Rap1gap2
Tppp3	2.69861e-06	-0.817879	0	0.241	0.0682451	14	Tppp3
Pard6g	2.71928e-06	0.856745	0.19	0.032	0.068768	14	Pard6g
Eif5b	2.77236e-06	0.340003	0.119	0.248	0.0701101	14	Eif5b
Srsf1	2.77472e-06	-0.713927	0.071	0.404	0.07017	14	Srsf1
Map2k7	2.80309e-06	-0.632838	0	0.24	0.0708873	14	Map2k7
Tmem132c	2.82816e-06	0.926493	0.119	0.013	0.0715212	14	Tmem132c
Hexim1	2.87664e-06	1.1617	0.381	0.24	0.0727473	14	Hexim1
Tceal5	2.9337e-06	-0.661606	0	0.239	0.0741903	14	Tceal5
Swi5	2.93746e-06	0.252489	0.238	0.472	0.0742854	14	Swi5
Pbx3	2.96044e-06	-0.707516	0.024	0.308	0.0748666	14	Pbx3
Ifrd1	3.02398e-06	0.999489	0.476	0.235	0.0764733	14	Ifrd1
Alkbh5	3.03428e-06	0.74335	0.31	0.195	0.0767339	14	Alkbh5
Arl6	3.04708e-06	-0.603853	0	0.239	0.0770575	14	Arl6
Uba2	3.07882e-06	-0.482037	0.071	0.374	0.0778602	14	Uba2
Epb41l1	3.08241e-06	-0.683905	0.095	0.437	0.077951	14	Epb41l1
Chd4	3.11277e-06	-0.434823	0.143	0.463	0.078719	14	Chd4
Tub	3.11408e-06	-0.701794	0.024	0.317	0.0787519	14	Tub
Ssbp3	3.12267e-06	-0.725576	0.024	0.322	0.0789693	14	Ssbp3
Ptprd	3.13701e-06	-1.23631	0.024	0.33	0.0793319	14	Ptprd
Nefl	3.14086e-06	-0.71106	0	0.238	0.0794292	14	Nefl
Fcgrt	3.14752e-06	0.952891	0.286	0.048	0.0795976	14	Fcgrt
Prkce	3.18881e-06	-0.729678	0	0.238	0.0806417	14	Prkce
BC023829	3.18881e-06	-0.611095	0	0.238	0.0806417	14	BC023829
Kctd13	3.21305e-06	-0.646319	0	0.238	0.0812548	14	Kctd13
Irx1	3.23747e-06	-0.692139	0	0.238	0.0818724	14	Irx1
Antxr1	3.3236e-06	0.98681	0.214	0.026	0.0840505	14	Antxr1
Mylip	3.46222e-06	1.12338	0.262	0.053	0.0875561	14	Mylip
Gria4	3.4656e-06	-0.747152	0	0.236	0.0876417	14	Gria4
Fubp1	3.50022e-06	-0.848842	0.119	0.482	0.0885171	14	Fubp1
Atg12	3.54509e-06	-0.750159	0	0.236	0.0896518	14	Atg12
Hras	3.54615e-06	-0.60412	0.024	0.306	0.0896785	14	Hras
Csnk1e	3.56118e-06	-0.674038	0.071	0.401	0.0900586	14	Csnk1e
Psd	3.57198e-06	-0.58339	0	0.236	0.0903319	14	Psd
Lhfpl3	3.59907e-06	-1.04605	0	0.236	0.091017	14	Lhfpl3
Scn2b	3.62622e-06	-0.416818	0.024	0.27	0.0917035	14	Scn2b
Gnaz	3.62636e-06	-0.658611	0	0.236	0.0917071	14	Gnaz
Nt5dc3	3.62636e-06	-0.659107	0	0.236	0.0917071	14	Nt5dc3
Cnp	3.65386e-06	-2.20406	0	0.235	0.0924024	14	Cnp
Ndufv2	3.6552e-06	-0.706817	0.071	0.399	0.0924363	14	Ndufv2
Tonsl	3.65615e-06	-0.660555	0.024	0.311	0.0924603	14	Tonsl
Meaf6	3.70946e-06	-0.642008	0	0.235	0.0938086	14	Meaf6
Cdipt	3.75501e-06	-0.728063	0.048	0.365	0.0949604	14	Cdipt
Cct2	3.86315e-06	-0.755385	0.095	0.443	0.0976951	14	Cct2
Nipal3	3.88129e-06	-0.613147	0	0.234	0.0981539	14	Nipal3
Ids	3.90636e-06	-0.538603	0.19	0.554	0.098788	14	Ids
Ccdc80	3.91734e-06	0.827236	0.119	0.006	0.0990655	14	Ccdc80
Tle1	3.91741e-06	0.868051	0.19	0.094	0.0990674	14	Tle1
Suclg1	3.95097e-06	-0.611924	0.048	0.347	0.0999161	14	Suclg1
Rasa3	3.9701e-06	-0.830195	0	0.234	0.1004	14	Rasa3
Ociad2	4.0609e-06	-0.631555	0	0.234	0.102696	14	Ociad2
Ogfod1	4.0609e-06	-0.59918	0	0.234	0.102696	14	Ogfod1
C1qbp	4.13425e-06	-0.738286	0.024	0.318	0.104551	14	C1qbp
Serp2	4.15374e-06	-0.611502	0	0.233	0.105044	14	Serp2
Lrrc4c	4.21678e-06	-0.644775	0	0.233	0.106638	14	Lrrc4c
Dag1	4.31302e-06	0.890093	0.452	0.224	0.109072	14	Dag1
Tnik	4.3131e-06	-0.643326	0	0.232	0.109074	14	Tnik
Epm2aip1	4.39113e-06	-0.833759	0.048	0.369	0.111047	14	Epm2aip1
Armc1	4.42376e-06	-0.533019	0.048	0.331	0.111872	14	Armc1
Adgrg1	4.44489e-06	-0.992224	0	0.232	0.112407	14	Adgrg1
Il13ra1	4.47206e-06	0.779725	0.214	0.026	0.113094	14	Il13ra1
Agap1	4.47845e-06	-0.697326	0	0.232	0.113256	14	Agap1
Nfyc	4.48599e-06	0.424766	0.071	0.124	0.113446	14	Nfyc
Sgsm1	4.54632e-06	-0.660583	0	0.232	0.114972	14	Sgsm1
Ddx39b	4.63898e-06	-0.589878	0.143	0.493	0.117315	14	Ddx39b
Dync1li2	4.72042e-06	-0.669471	0	0.231	0.119375	14	Dync1li2
Prkcq	4.76448e-06	-0.98084	0.024	0.322	0.120489	14	Prkcq
Klc2	4.79187e-06	-0.547591	0	0.231	0.121182	14	Klc2
Yif1a	4.80909e-06	0.82225	0.19	0.064	0.121617	14	Yif1a
Arpc5l	4.87022e-06	-0.769441	0.024	0.313	0.123163	14	Arpc5l
Ndufb2	4.92623e-06	-0.788516	0.024	0.32	0.12458	14	Ndufb2
Mgat3	4.94331e-06	0.645443	0.214	0.119	0.125011	14	Mgat3
Kcnb1	5.01265e-06	-0.640572	0	0.23	0.126765	14	Kcnb1
Nefm	5.01265e-06	-0.692799	0	0.23	0.126765	14	Nefm
Rbfox2	5.04018e-06	-0.415635	0.071	0.357	0.127461	14	Rbfox2
G0s2	5.05532e-06	0.955907	0.19	0.019	0.127844	14	G0s2
Gosr2	5.0777e-06	0.465898	0.095	0.256	0.12841	14	Gosr2
Sema3e	5.08843e-06	-0.66746	0	0.23	0.128681	14	Sema3e
Nme1	5.09284e-06	-0.785118	0.071	0.402	0.128793	14	Nme1
Sybu	5.12674e-06	-0.666225	0	0.229	0.12965	14	Sybu
Chst2	5.26271e-06	-0.979101	0.095	0.442	0.133089	14	Chst2
Sec23b	5.27297e-06	-0.250141	0.048	0.275	0.133348	14	Sec23b
Yipf5	5.28284e-06	-0.652049	0	0.229	0.133598	14	Yipf5
Fam219a	5.34188e-06	-0.844697	0.071	0.405	0.135091	14	Fam219a
Slc24a3	5.35704e-06	0.981857	0.286	0.149	0.135474	14	Slc24a3
Lama4	5.3759e-06	0.979227	0.167	0.02	0.135951	14	Lama4
Sel1l	5.39261e-06	-0.838429	0.048	0.363	0.136374	14	Sel1l
Gabarap	5.41197e-06	0.402779	0.31	0.462	0.136863	14	Gabarap
Ndufa2	5.46815e-06	0.306974	0.262	0.432	0.138284	14	Ndufa2
Rps3a1	5.49088e-06	0.441078	0.595	0.664	0.138859	14	Rps3a1
Acot13	5.49383e-06	0.344252	0.071	0.139	0.138934	14	Acot13
A730017C20Rik	5.65126e-06	-0.70463	0	0.228	0.142915	14	A730017C20Rik
Mtpn	5.66988e-06	-0.369166	0.071	0.339	0.143386	14	Mtpn
Cdh2	5.69372e-06	-0.779576	0	0.227	0.143988	14	Cdh2
Bmp4	5.71517e-06	0.973454	0.19	0.02	0.144531	14	Bmp4
Frrs1l	5.80299e-06	-0.807092	0.024	0.309	0.146752	14	Frrs1l
Cadps2	5.81914e-06	-0.883146	0.071	0.4	0.14716	14	Cadps2
Yeats4	5.82298e-06	-0.675178	0	0.227	0.147257	14	Yeats4
Efr3b	5.8667e-06	-0.663169	0	0.227	0.148363	14	Efr3b
Fam57b	5.91074e-06	-0.584256	0	0.227	0.149477	14	Fam57b
Rpl24	5.9419e-06	0.385122	0.452	0.596	0.150265	14	Rpl24
Zyg11b	5.9833e-06	-0.607642	0.024	0.299	0.151312	14	Zyg11b
Cnih2	5.99051e-06	-0.516886	0.048	0.334	0.151494	14	Cnih2
Mdh2	5.99401e-06	-0.495488	0.119	0.44	0.151583	14	Mdh2
Fam174a	6.0383e-06	-0.714322	0.048	0.347	0.152702	14	Fam174a
Bcat1	6.09018e-06	-0.629312	0	0.226	0.154014	14	Bcat1
Jag1	6.12357e-06	0.861324	0.214	0.029	0.154859	14	Jag1
X1110051M20Rik	6.13586e-06	-0.571552	0	0.226	0.15517	14	X1110051M20Rik
Tomm70a	6.16733e-06	-0.572089	0.024	0.29	0.155966	14	Tomm70a
Pou3f1	6.18188e-06	-0.760984	0	0.226	0.156334	14	Pou3f1
Tgfb2	6.18188e-06	-0.770996	0	0.226	0.156334	14	Tgfb2
Numbl	6.20078e-06	0.370686	0.048	0.109	0.156812	14	Numbl
Ddr2	6.2187e-06	0.942713	0.119	0.008	0.157265	14	Ddr2
Slc12a2	6.27494e-06	-1.14986	0	0.226	0.158687	14	Slc12a2
Olig1	6.32199e-06	-2.2861	0	0.226	0.159877	14	Olig1
Set	6.35539e-06	-0.583274	0.214	0.569	0.160721	14	Set
Ppp2r1a	6.36856e-06	-0.71505	0.214	0.585	0.161055	14	Ppp2r1a
C530008M17Rik	6.37998e-06	-0.753424	0.024	0.317	0.161343	14	C530008M17Rik
Gm4631	6.41711e-06	-0.612277	0	0.225	0.162282	14	Gm4631
Svop	6.41711e-06	-0.574679	0	0.225	0.162282	14	Svop
Kifap3	6.45397e-06	-0.760144	0.048	0.361	0.163214	14	Kifap3
Rragc	6.55498e-06	0.342801	0.143	0.26	0.165769	14	Rragc
Hmbox1	6.61159e-06	-0.608568	0	0.225	0.1672	14	Hmbox1
Imp3	6.64634e-06	0.728981	0.262	0.187	0.168079	14	Imp3
Rnf115	6.76122e-06	-0.648854	0	0.224	0.170985	14	Rnf115
Strn4	6.82378e-06	-0.304112	0.048	0.291	0.172567	14	Strn4
Arfgef3	6.86282e-06	-0.610451	0	0.224	0.173554	14	Arfgef3
Mrps21	6.91525e-06	0.453355	0.167	0.235	0.17488	14	Mrps21
Chmp4b	6.92913e-06	-0.635538	0.214	0.58	0.175231	14	Chmp4b
Ipo7	7.01802e-06	-0.670023	0	0.224	0.177479	14	Ipo7
Smarcc2	7.04433e-06	-0.63562	0.119	0.456	0.178144	14	Smarcc2
Mvb12b	7.11638e-06	-0.683612	0.048	0.351	0.179966	14	Mvb12b
Mkks	7.182e-06	0.251954	0.024	0.119	0.181626	14	Mkks
Strap	7.20651e-06	-0.817428	0.024	0.315	0.182245	14	Strap
Atpif1	7.24035e-06	-0.286836	0.119	0.401	0.183101	14	Atpif1
Adgrb3	7.28437e-06	-0.639728	0	0.223	0.184214	14	Adgrb3
Pld5	7.33881e-06	-0.672707	0	0.223	0.185591	14	Pld5
Prkcz	7.33881e-06	-0.616187	0	0.223	0.185591	14	Prkcz
Gdpd5	7.39366e-06	-0.737275	0	0.223	0.186978	14	Gdpd5
Appbp2	7.41527e-06	-0.70935	0.071	0.391	0.187525	14	Appbp2
Mark2	7.4489e-06	-0.608136	0	0.223	0.188375	14	Mark2
Atp6v0c	7.45855e-06	-0.730819	0.452	0.751	0.188619	14	Atp6v0c
Klf7	7.47387e-06	-0.639369	0.071	0.379	0.189007	14	Klf7
D630003M21Rik	7.48933e-06	0.495019	0.119	0.005	0.189398	14	D630003M21Rik
Dctn3	7.56061e-06	-0.599117	0	0.222	0.1912	14	Dctn3
Prrc2b	7.64282e-06	-0.768285	0.095	0.431	0.193279	14	Prrc2b
Tbc1d9	7.73126e-06	-0.619359	0	0.222	0.195516	14	Tbc1d9
Nrgn	7.75017e-06	-1.75612	0.024	0.306	0.195994	14	Nrgn
Tfrc	7.90544e-06	-0.614758	0.048	0.324	0.199921	14	Tfrc
Tbc1d14	7.96467e-06	-0.694743	0	0.221	0.201418	14	Tbc1d14
Tecr	8.20047e-06	-0.581854	0.19	0.544	0.207382	14	Tecr
Cisd1	8.20474e-06	-0.76264	0.071	0.396	0.20749	14	Cisd1
Pam	8.22363e-06	0.61725	0.381	0.33	0.207967	14	Pam
Dnajc12	8.45238e-06	-0.582806	0	0.22	0.213752	14	Dnajc12
Angptl2	8.57149e-06	0.876845	0.143	0.01	0.216764	14	Angptl2
Tmem64	8.5779e-06	0.888479	0.262	0.134	0.216926	14	Tmem64
Rnmt	8.57882e-06	-0.640279	0	0.22	0.21695	14	Rnmt
Pfkp	8.7071e-06	-0.572462	0	0.22	0.220194	14	Pfkp
Snhg14	8.77721e-06	-0.752924	0.024	0.31	0.221967	14	Snhg14
Ehmt2	8.83726e-06	-0.597916	0	0.22	0.223486	14	Ehmt2
Hspa1b	8.86535e-06	0.282323	0.405	0.116	0.224196	14	Hspa1b
Zdhhc2	9.10334e-06	-0.752561	0	0.219	0.230214	14	Zdhhc2
Elmo2	9.10334e-06	-0.646283	0	0.219	0.230214	14	Elmo2
Foxf2	9.12493e-06	0.916586	0.214	0.027	0.23076	14	Foxf2
Tomm40	9.17107e-06	-0.578122	0	0.219	0.231927	14	Tomm40
Lrrc3b	9.2393e-06	-0.57644	0	0.219	0.233653	14	Lrrc3b
Rprd1a	9.3164e-06	-0.372022	0.024	0.251	0.235603	14	Rprd1a
Cnnm2	9.37725e-06	-0.574185	0	0.219	0.237141	14	Cnnm2
Atxn7l3	9.37725e-06	-0.579386	0	0.219	0.237141	14	Atxn7l3
Rgma	9.38886e-06	0.669313	0.31	0.256	0.237435	14	Rgma
Cd151	9.47841e-06	1.01917	0.31	0.105	0.2397	14	Cd151
Abi1	9.51722e-06	-0.755603	0	0.218	0.240681	14	Abi1
Blcap	9.51766e-06	-0.702589	0.048	0.35	0.240692	14	Blcap
Olfm3	9.58798e-06	-0.770221	0	0.218	0.24247	14	Olfm3
Ak1	9.65924e-06	-0.573351	0	0.218	0.244273	14	Ak1
Fam73a	9.76522e-06	-0.552196	0.024	0.284	0.246953	14	Fam73a
Chst15	9.83852e-06	0.665192	0.143	0.013	0.248806	14	Chst15
Mrps18c	9.87153e-06	-0.811186	0.024	0.308	0.249641	14	Mrps18c
Dlg2	9.87617e-06	-0.610015	0	0.218	0.249758	14	Dlg2
Anxa5	1.00518e-05	0.795027	0.405	0.128	0.254201	14	Anxa5
Gnal	1.00613e-05	-0.593695	0.024	0.289	0.25444	14	Gnal
Nyap1	1.00979e-05	-0.69712	0	0.217	0.255365	14	Nyap1
Kdelr2	1.01534e-05	0.834546	0.214	0.094	0.25677	14	Kdelr2
Cbln4	1.01729e-05	-0.750404	0	0.217	0.257261	14	Cbln4
Rnf14	1.02433e-05	-0.737123	0.119	0.456	0.259043	14	Rnf14
Fabp5	1.02484e-05	-0.994285	0	0.217	0.259171	14	Fabp5
Peg3	1.03065e-05	-0.561757	0.119	0.448	0.260642	14	Peg3
Epdr1	1.03244e-05	-0.741261	0	0.217	0.261095	14	Epdr1
F3	1.03296e-05	1.55069	0.238	0.057	0.261226	14	F3
Cct7	1.03362e-05	-0.827366	0.071	0.394	0.261393	14	Cct7
Msmo1	1.03426e-05	-1.08302	0.024	0.308	0.261553	14	Msmo1
Ewsr1	1.03567e-05	-0.409047	0.143	0.469	0.26191	14	Ewsr1
Hspb1	1.04414e-05	0.691294	0.333	0.084	0.264053	14	Hspb1
Snx10	1.04685e-05	-0.809074	0.024	0.308	0.264738	14	Snx10
Tnks	1.04831e-05	-0.851541	0.024	0.309	0.265107	14	Tnks
Papola	1.05081e-05	0.334146	0.143	0.262	0.265739	14	Papola
Spag7	1.05179e-05	-0.315683	0.048	0.29	0.265987	14	Spag7
Cisd2	1.06154e-05	-0.274504	0.048	0.272	0.268454	14	Cisd2
Ramp2	1.0663e-05	1.02824	0.286	0.055	0.269657	14	Ramp2
Rtn4rl1	1.07926e-05	-0.605583	0	0.216	0.272935	14	Rtn4rl1
Ubqln2	1.09084e-05	-0.463652	0.119	0.456	0.275862	14	Ubqln2
Nrip3	1.09533e-05	-0.596025	0	0.216	0.276998	14	Nrip3
Purb	1.09548e-05	-0.823959	0.19	0.55	0.277035	14	Purb
Cabp1	1.11163e-05	-0.550384	0	0.215	0.281119	14	Cabp1
Ephx1	1.11498e-05	0.973107	0.286	0.059	0.281968	14	Ephx1
A830010M20Rik	1.11987e-05	-0.59946	0	0.215	0.283203	14	A830010M20Rik
Npepps	1.12762e-05	-0.529398	0.095	0.396	0.285163	14	Npepps
Dnm1l	1.13624e-05	-0.357358	0.048	0.301	0.287344	14	Dnm1l
Ablim2	1.13652e-05	-0.59139	0	0.215	0.287415	14	Ablim2
Sms	1.13652e-05	-0.578768	0	0.215	0.287415	14	Sms
Atad1	1.14675e-05	-0.632422	0.048	0.329	0.290001	14	Atad1
Pon2	1.14703e-05	1.02259	0.19	0.04	0.290072	14	Pon2
Acadsb	1.15414e-05	0.433177	0.119	0.189	0.29187	14	Acadsb
Chd1	1.1633e-05	-0.472511	0.071	0.35	0.294188	14	Chd1
Pigk	1.16699e-05	0.319941	0.071	0.162	0.295121	14	Pigk
Scn3b	1.17923e-05	-0.520575	0	0.214	0.298216	14	Scn3b
Lrrn3	1.17993e-05	-0.57699	0.024	0.277	0.298392	14	Lrrn3
Mapre3	1.18128e-05	-0.537	0.024	0.288	0.298733	14	Mapre3
Snx27	1.1947e-05	-0.620827	0.024	0.29	0.302127	14	Snx27
Ttc3	1.20951e-05	-0.795526	0.119	0.457	0.305872	14	Ttc3
Gprasp1	1.21106e-05	-0.67258	0.19	0.539	0.306266	14	Gprasp1
Capza2	1.22828e-05	-0.542595	0.071	0.376	0.31062	14	Capza2
Evl	1.23408e-05	-0.791804	0.048	0.35	0.312087	14	Evl
Fkbp8	1.24221e-05	-0.46393	0.095	0.391	0.314144	14	Fkbp8
Tspan7	1.25559e-05	-0.986567	0.262	0.609	0.317527	14	Tspan7
Macrod2	1.26011e-05	-0.600963	0	0.213	0.318669	14	Macrod2
Ifitm3	1.27039e-05	0.667128	0.262	0.049	0.32127	14	Ifitm3
Cacybp	1.27184e-05	-0.511315	0.143	0.458	0.321634	14	Cacybp
AF529169	1.28826e-05	-0.629466	0	0.213	0.325787	14	AF529169
Cox6b1	1.29795e-05	-0.729128	0.095	0.422	0.328239	14	Cox6b1
Map2k1	1.30649e-05	0.443779	0.238	0.397	0.330399	14	Map2k1
Hsp90b1	1.30845e-05	0.597657	0.5	0.558	0.330893	14	Hsp90b1
Mgat5	1.32675e-05	-0.586313	0	0.212	0.335521	14	Mgat5
P3h3	1.33652e-05	0.719558	0.262	0.188	0.337994	14	P3h3
Cbx5	1.33942e-05	-0.252821	0.095	0.343	0.338726	14	Cbx5
Gabrg2	1.34641e-05	-0.593542	0	0.212	0.340495	14	Gabrg2
Magi1	1.34641e-05	-0.601606	0	0.212	0.340495	14	Magi1
Dlat	1.34641e-05	-0.608816	0	0.212	0.340495	14	Dlat
Slc25a51	1.37013e-05	-0.514624	0.048	0.313	0.346492	14	Slc25a51
Prkaca	1.37229e-05	-0.503938	0.167	0.507	0.347038	14	Prkaca
Dlgap4	1.38712e-05	-0.447395	0.024	0.26	0.350789	14	Dlgap4
Msi2	1.39198e-05	-0.675334	0.167	0.513	0.352018	14	Msi2
Ehd3	1.39684e-05	-0.610603	0	0.211	0.353247	14	Ehd3
Hspa1a	1.40011e-05	0.565506	0.405	0.117	0.354073	14	Hspa1a
Dusp6	1.41163e-05	0.87857	0.31	0.069	0.356988	14	Dusp6
Rps15	1.42179e-05	0.430615	0.357	0.439	0.359557	14	Rps15
Ttyh3	1.42766e-05	-0.641918	0.024	0.283	0.361042	14	Ttyh3
Snhg18	1.43016e-05	0.728899	0.167	0.028	0.361673	14	Snhg18
Gns	1.43194e-05	0.657437	0.262	0.323	0.362123	14	Gns
Pim3	1.43693e-05	0.869413	0.238	0.149	0.363385	14	Pim3
Cnr1	1.44911e-05	-0.671274	0	0.211	0.366466	14	Cnr1
Anpep	1.45101e-05	0.574269	0.143	0.009	0.366946	14	Anpep
Vps41	1.4519e-05	-0.499973	0.024	0.273	0.367172	14	Vps41
Selt	1.45677e-05	0.646424	0.405	0.462	0.368403	14	Selt
Ctnna2	1.47055e-05	-0.643584	0	0.21	0.371889	14	Ctnna2
Gpr85	1.48139e-05	-0.605106	0	0.21	0.374629	14	Gpr85
Tceb2	1.50676e-05	-0.487029	0.143	0.46	0.381045	14	Tceb2
Dstyk	1.51133e-05	-0.714815	0.071	0.376	0.3822	14	Dstyk
Eml2	1.51382e-05	-0.86183	0.119	0.456	0.382831	14	Eml2
Fam120a	1.54296e-05	0.425613	0.19	0.243	0.390199	14	Fam120a
Sdcbp	1.54313e-05	-0.56545	0.119	0.43	0.390241	14	Sdcbp
X9330159F19Rik	1.54808e-05	-0.592093	0	0.209	0.391494	14	X9330159F19Rik
Ndufs2	1.5686e-05	-0.261827	0.119	0.377	0.396683	14	Ndufs2
Slc5a7	1.57096e-05	-0.752051	0	0.209	0.397279	14	Slc5a7
Sgip1	1.57096e-05	-0.546137	0	0.209	0.397279	14	Sgip1
Isyna1	1.58726e-05	0.892477	0.286	0.104	0.401402	14	Isyna1
Scamp5	1.58852e-05	-0.465365	0.048	0.326	0.40172	14	Scamp5
Pigp	1.59572e-05	0.59068	0.071	0.153	0.403543	14	Pigp
Atcay	1.60589e-05	-0.520507	0	0.209	0.406115	14	Atcay
Hdac5	1.61923e-05	-0.643496	0.048	0.333	0.409487	14	Hdac5
Rps28	1.61983e-05	0.640192	0.452	0.322	0.409639	14	Rps28
Lpgat1	1.62961e-05	-0.59022	0	0.208	0.412111	14	Lpgat1
Hsp90aa1	1.64661e-05	-0.630878	0.429	0.763	0.416411	14	Hsp90aa1
Atp13a2	1.65366e-05	-0.549573	0	0.208	0.418195	14	Atp13a2
Nol12	1.6625e-05	-0.367829	0.048	0.286	0.420429	14	Nol12
Wdr7	1.67807e-05	-0.558203	0	0.208	0.424367	14	Wdr7
Dync1i1	1.67807e-05	-0.54388	0	0.208	0.424367	14	Dync1i1
Mcfd2	1.6781e-05	-0.848552	0.024	0.3	0.424374	14	Mcfd2
Pds5a	1.69781e-05	0.604471	0.095	0.176	0.42936	14	Pds5a
Sbno1	1.70817e-05	-0.712284	0.048	0.34	0.431979	14	Sbno1
Inpp5f	1.73929e-05	-0.686765	0.024	0.297	0.43985	14	Inpp5f
Atp2b2	1.7663e-05	-0.582007	0	0.207	0.446679	14	Atp2b2
Ap1m1	1.7663e-05	-0.586713	0	0.207	0.446679	14	Ap1m1
G3bp2	1.76685e-05	-0.486828	0.119	0.419	0.44682	14	G3bp2
S100a10	1.77252e-05	0.645987	0.167	0.016	0.448251	14	S100a10
Med30	1.77927e-05	-0.589237	0	0.207	0.449959	14	Med30
Fibcd1	1.80549e-05	-0.67604	0	0.207	0.45659	14	Fibcd1
Acbd5	1.81874e-05	-0.673759	0	0.206	0.459941	14	Acbd5
Tmem33	1.82142e-05	-0.261639	0.095	0.35	0.46062	14	Tmem33
Dusp1	1.82437e-05	1.12699	0.381	0.197	0.461364	14	Dusp1
Pgm2l1	1.84553e-05	-0.664381	0	0.206	0.466716	14	Pgm2l1
Rgs2	1.85907e-05	-0.75062	0	0.206	0.47014	14	Rgs2
Gprasp2	1.87145e-05	-0.76076	0.095	0.414	0.47327	14	Gprasp2
Fem1b	1.88262e-05	-0.603912	0.071	0.369	0.476097	14	Fem1b
Tma7	1.88365e-05	-0.26642	0.095	0.381	0.476357	14	Tma7
Impa1	1.91421e-05	-0.586124	0	0.206	0.484085	14	Impa1
Sqle	1.91421e-05	-0.657325	0	0.206	0.484085	14	Sqle
Ube2d3	1.92886e-05	-0.494875	0.238	0.57	0.48779	14	Ube2d3
Rrp7a	1.94238e-05	-0.566609	0	0.205	0.491208	14	Rrp7a
Oprl1	1.95661e-05	-0.526562	0	0.205	0.494808	14	Oprl1
Nipsnap1	1.98539e-05	-0.529463	0	0.205	0.502086	14	Nipsnap1
Golga7b	1.99994e-05	-0.511745	0	0.205	0.505765	14	Golga7b
Pitpnm1	2.0032e-05	-0.292427	0.024	0.227	0.506588	14	Pitpnm1
Fam217b	2.01459e-05	-0.558047	0	0.205	0.509469	14	Fam217b
Rpl18	2.02352e-05	0.46148	0.5	0.563	0.511728	14	Rpl18
X4932438A13Rik	2.02934e-05	-0.592214	0	0.204	0.513201	14	X4932438A13Rik
Neurod1	2.02934e-05	-0.6205	0	0.204	0.513201	14	Neurod1
Slc12a5	2.02934e-05	-0.865268	0	0.204	0.513201	14	Slc12a5
Emsy	2.05901e-05	-0.350921	0.048	0.293	0.520703	14	Emsy
Pogz	2.06357e-05	0.374018	0.071	0.192	0.521856	14	Pogz
Myl12a	2.08095e-05	0.991914	0.429	0.181	0.526252	14	Myl12a
Slc24a2	2.08943e-05	-0.763266	0	0.204	0.528396	14	Slc24a2
Rps27a	2.09459e-05	0.308871	0.548	0.748	0.529701	14	Rps27a
Ube2ql1	2.10472e-05	-0.594785	0	0.204	0.532263	14	Ube2ql1
Hspa4l	2.10658e-05	-0.743431	0.048	0.34	0.532732	14	Hspa4l
Kank2	2.1281e-05	1.0333	0.167	0.022	0.538175	14	Kank2
Celf5	2.16684e-05	-0.416143	0.024	0.253	0.547973	14	Celf5
Ablim3	2.16699e-05	-0.542412	0	0.203	0.548011	14	Ablim3
Rps20	2.18017e-05	0.615167	0.524	0.465	0.551343	14	Rps20
Add3	2.18952e-05	0.879762	0.357	0.113	0.553707	14	Add3
Hnrnph2	2.19813e-05	0.765263	0.214	0.335	0.555886	14	Hnrnph2
Map4k2	2.1988e-05	-0.556861	0	0.203	0.556056	14	Map4k2
Rab15	2.21488e-05	-0.515847	0	0.203	0.560121	14	Rab15
Ptpn13	2.21537e-05	0.702304	0.143	0.015	0.560245	14	Ptpn13
Akap1	2.21679e-05	0.250168	0.024	0.128	0.560605	14	Akap1
R3hdm1	2.23107e-05	-0.583909	0	0.203	0.564216	14	R3hdm1
Tor1aip1	2.25261e-05	0.84061	0.286	0.119	0.569662	14	Tor1aip1
Nxn	2.25797e-05	0.839405	0.19	0.04	0.571017	14	Nxn
Capza1	2.27322e-05	-0.671287	0.024	0.289	0.574873	14	Capza1
Gmps	2.29701e-05	-0.521924	0	0.202	0.58089	14	Gmps
Mrpl23	2.30636e-05	0.440394	0.119	0.175	0.583254	14	Mrpl23
2019-03-02	2.32084e-05	0.273788	0.024	0.135	0.586917	14	2019-03-02
Morn4	2.33069e-05	-0.503021	0	0.202	0.589407	14	Morn4
Psmc1	2.33479e-05	-0.676795	0.048	0.334	0.590445	14	Psmc1
Vkorc1	2.34158e-05	1.0359	0.286	0.097	0.592162	14	Vkorc1
Pebp1	2.34295e-05	-0.319439	0.238	0.583	0.59251	14	Pebp1
Nap1l3	2.34771e-05	-0.568222	0	0.202	0.593712	14	Nap1l3
Blmh	2.36263e-05	-0.350411	0.024	0.237	0.597485	14	Blmh
Hcfc1r1	2.36343e-05	-0.511769	0.071	0.36	0.597687	14	Hcfc1r1
Smarca2	2.37912e-05	-0.536205	0.095	0.395	0.601654	14	Smarca2
Rsrp1	2.38075e-05	0.724551	0.619	0.473	0.602068	14	Rsrp1
Ubxn7	2.38212e-05	-0.56586	0	0.202	0.602413	14	Ubxn7
Mpc1	2.38303e-05	-0.748185	0.095	0.414	0.602645	14	Mpc1
Impact	2.41803e-05	-1.02511	0.238	0.574	0.611495	14	Impact
Rnf5	2.44177e-05	-0.464166	0.048	0.3	0.6175	14	Rnf5
Tm9sf3	2.45366e-05	0.373222	0.262	0.439	0.620505	14	Tm9sf3
Prdx2	2.46857e-05	-0.648237	0.143	0.474	0.624278	14	Prdx2
Wscd1	2.54317e-05	-0.794746	0	0.2	0.643143	14	Wscd1
Atp5f1	2.54817e-05	-0.443506	0.214	0.542	0.644407	14	Atp5f1
Ccnl1	2.57472e-05	0.872452	0.262	0.206	0.651122	14	Ccnl1
Hsp90ab1	2.61931e-05	-0.589525	0.524	0.813	0.662396	14	Hsp90ab1
Maoa	2.67897e-05	-0.906856	0.167	0.5	0.677485	14	Maoa
Gm10053	2.71556e-05	-0.86504	0.143	0.474	0.686737	14	Gm10053
Sucla2	2.73237e-05	-0.622078	0.048	0.324	0.69099	14	Sucla2
Hadh	2.73734e-05	0.85189	0.262	0.084	0.692246	14	Hadh
Rnpep	2.75457e-05	-0.543261	0	0.199	0.696604	14	Rnpep
Clcn2	2.76278e-05	0.704123	0.19	0.069	0.698679	14	Clcn2
Adgre5	2.77558e-05	1.10163	0.214	0.038	0.701915	14	Adgre5
Psmd11	2.8206e-05	-0.336586	0.048	0.276	0.713301	14	Psmd11
X6030419C18Rik	2.83564e-05	-0.61473	0	0.198	0.717106	14	X6030419C18Rik
Klhdc8b	2.84597e-05	-0.390729	0.048	0.289	0.719717	14	Klhdc8b
Trim44	2.85515e-05	-0.492669	0.048	0.313	0.722039	14	Trim44
Mark4	2.87705e-05	-0.513046	0	0.198	0.727577	14	Mark4
Mblac2	2.87705e-05	-0.515979	0	0.198	0.727577	14	Mblac2
Atl1	2.89798e-05	-0.549912	0	0.198	0.732869	14	Atl1
Atp6ap2	2.90764e-05	-0.513486	0.143	0.455	0.735314	14	Atp6ap2
Rimbp2	2.94027e-05	-0.546174	0	0.198	0.743566	14	Rimbp2
Htr5b	2.94027e-05	-0.578174	0	0.198	0.743566	14	Htr5b
Chn1	2.94493e-05	-0.407456	0.071	0.329	0.744743	14	Chn1
G6pc3	2.97592e-05	0.386151	0.119	0.198	0.752581	14	G6pc3
Bcan	3.00486e-05	-1.61176	0	0.197	0.759899	14	Bcan
Cers4	3.01429e-05	-0.820746	0.024	0.286	0.762284	14	Cers4
Arl4c	3.0267e-05	-0.614591	0	0.197	0.765422	14	Arl4c
Adamts5	3.05364e-05	0.634193	0.143	0.013	0.772234	14	Adamts5
Cand1	3.06175e-05	-0.621279	0.048	0.321	0.774286	14	Cand1
Hacd3	3.08104e-05	-0.606769	0.071	0.36	0.779164	14	Hacd3
Adgrl1	3.13775e-05	-0.759789	0.048	0.333	0.793506	14	Adgrl1
Rprm	3.13824e-05	-0.829392	0	0.196	0.793629	14	Rprm
Prdx4	3.17031e-05	0.852215	0.214	0.04	0.801741	14	Prdx4
2019-09-03	3.17136e-05	-0.636858	0.024	0.286	0.802006	14	2019-09-03
Snhg1	3.19054e-05	0.829421	0.238	0.174	0.806856	14	Snhg1
Tceal6	3.23036e-05	-0.471233	0	0.196	0.816926	14	Tceal6
Rell2	3.23036e-05	-0.472859	0	0.196	0.816926	14	Rell2
Ilkap	3.23036e-05	-0.568861	0	0.196	0.816926	14	Ilkap
X2410002F23Rik	3.23036e-05	-0.591636	0	0.196	0.816926	14	X2410002F23Rik
Ufd1l	3.25235e-05	-0.518525	0.024	0.263	0.822487	14	Ufd1l
Mark1	3.2538e-05	-0.517274	0	0.196	0.822854	14	Mark1
Cers1	3.2538e-05	-0.585001	0	0.196	0.822854	14	Cers1
Atxn7l3b	3.25539e-05	-0.379366	0.238	0.567	0.823255	14	Atxn7l3b
Snph	3.27741e-05	-0.497809	0	0.196	0.828825	14	Snph
Rnd2	3.31682e-05	-0.533348	0.048	0.298	0.838791	14	Rnd2
Lrrc49	3.32514e-05	-0.552789	0	0.195	0.840894	14	Lrrc49
Bag3	3.32573e-05	0.793227	0.19	0.029	0.841044	14	Bag3
Cstb	3.33e-05	0.780487	0.262	0.134	0.842125	14	Cstb
Chtop	3.35164e-05	-0.486148	0.024	0.254	0.847595	14	Chtop
Aes	3.35868e-05	-0.568588	0.238	0.581	0.849378	14	Aes
Vamp2	3.39601e-05	-0.80514	0.238	0.577	0.858817	14	Vamp2
Gpx4	3.40133e-05	0.487207	0.381	0.524	0.860163	14	Gpx4
Psma3	3.41603e-05	-0.378182	0.119	0.4	0.863879	14	Psma3
Nolc1	3.41652e-05	0.333258	0.071	0.167	0.864003	14	Nolc1
Pcbp3	3.42264e-05	-0.530559	0	0.195	0.865551	14	Pcbp3
Zfr	3.48727e-05	-0.435268	0.095	0.374	0.881895	14	Zfr
Ppp3r1	3.51712e-05	-0.393146	0.167	0.483	0.889446	14	Ppp3r1
Pbx2	3.53135e-05	0.529147	0.048	0.128	0.893042	14	Pbx2
Rtf1	3.54846e-05	-0.560468	0	0.194	0.897371	14	Rtf1
Akap6	3.54846e-05	-0.492785	0	0.194	0.897371	14	Akap6
St6gal1	3.57171e-05	0.946067	0.19	0.033	0.90325	14	St6gal1
Epb41l3	3.59048e-05	-0.253901	0.119	0.367	0.907996	14	Epb41l3
Brox	3.59427e-05	0.391242	0.119	0.235	0.908954	14	Brox
Rgs17	3.60006e-05	-0.545576	0	0.194	0.910418	14	Rgs17
Ano1	3.60249e-05	-0.511834	0.024	0.253	0.911033	14	Ano1
Cirbp	3.62565e-05	-0.273958	0.143	0.406	0.916891	14	Cirbp
Serpini1	3.62613e-05	-0.589068	0	0.194	0.917011	14	Serpini1
Plxnd1	3.6341e-05	0.648817	0.167	0.028	0.919027	14	Plxnd1
Polr2g	3.67276e-05	-0.528377	0.048	0.309	0.928805	14	Polr2g
Wfikkn2	3.67882e-05	-0.660075	0	0.193	0.930338	14	Wfikkn2
Scn1b	3.70546e-05	-0.510431	0	0.193	0.937073	14	Scn1b
Letm1	3.73227e-05	-0.565331	0	0.193	0.943855	14	Letm1
Ppfia4	3.73227e-05	-0.571873	0	0.193	0.943855	14	Ppfia4
Scai	3.76162e-05	-0.685008	0.048	0.326	0.951276	14	Scai
Ndufa10	3.80248e-05	-0.631953	0.024	0.283	0.96161	14	Ndufa10
Cops4	3.83721e-05	-0.679619	0.024	0.285	0.970391	14	Cops4
Azin1	3.84143e-05	0.362939	0.143	0.27	0.97146	14	Azin1
Rpl10	3.85448e-05	0.370797	0.286	0.374	0.97476	14	Rpl10
Slc5a3	3.88e-05	1.01603	0.19	0.082	0.981214	14	Slc5a3
Ipo5	3.95977e-05	-0.600459	0.024	0.267	1	14	Ipo5
Cep120	3.98238e-05	-0.56867	0	0.192	1	14	Cep120
Pdzd4	3.98238e-05	-0.493175	0	0.192	1	14	Pdzd4
Madd	3.98238e-05	-0.504659	0	0.192	1	14	Madd
Cttnbp2	3.98238e-05	-0.559559	0	0.192	1	14	Cttnbp2
Pink1	4.01688e-05	-0.32229	0.119	0.402	1	14	Pink1
Cdk5r2	4.04015e-05	-0.478126	0	0.192	1	14	Cdk5r2
Elp2	4.06438e-05	-0.597868	0.024	0.265	1	14	Elp2
Ctbp1	4.07595e-05	-0.464583	0.095	0.369	1	14	Ctbp1
Ap3s1	4.0801e-05	-0.506687	0.143	0.448	1	14	Ap3s1
Scaf1	4.0865e-05	-0.254182	0.024	0.212	1	14	Scaf1
Bsn	4.09874e-05	-0.52078	0	0.191	1	14	Bsn
Strbp	4.10312e-05	-0.728779	0.048	0.327	1	14	Strbp
Csf3r	4.12835e-05	-0.599025	0	0.191	1	14	Csf3r
Nefh	4.15817e-05	-0.515095	0	0.191	1	14	Nefh
Cdh13	4.15817e-05	-0.615936	0	0.191	1	14	Cdh13
Dnajc3	4.21712e-05	0.832453	0.357	0.192	1	14	Dnajc3
Slc30a9	4.22867e-05	-0.543073	0.048	0.309	1	14	Slc30a9
Fam103a1	4.27444e-05	-0.520602	0.048	0.309	1	14	Fam103a1
Atp6v1d	4.32761e-05	-0.597891	0.119	0.429	1	14	Atp6v1d
Hars	4.34342e-05	-0.697817	0.024	0.282	1	14	Hars
Higd2a	4.34849e-05	-0.747225	0.095	0.404	1	14	Higd2a
Tuba4a	4.3729e-05	-0.520767	0	0.19	1	14	Tuba4a
Ache	4.37304e-05	-0.258857	0.024	0.211	1	14	Ache
Agpat3	4.37781e-05	-0.647775	0.071	0.359	1	14	Agpat3
Arl8b	4.39746e-05	-0.372659	0.095	0.364	1	14	Arl8b
Arrb2	4.40445e-05	-0.601825	0	0.19	1	14	Arrb2
Pde4dip	4.44932e-05	-0.485371	0.024	0.253	1	14	Pde4dip
Clasp2	4.45145e-05	-0.481481	0.024	0.253	1	14	Clasp2
Smarcd1	4.46762e-05	-0.661636	0.024	0.282	1	14	Smarcd1
Ptpdc1	4.49117e-05	-0.82895	0.024	0.282	1	14	Ptpdc1
Pmm1	4.50044e-05	-0.546773	0	0.19	1	14	Pmm1
Tpm4	4.50263e-05	0.991871	0.357	0.128	1	14	Tpm4
Prkar2b	4.51412e-05	-0.25357	0.024	0.21	1	14	Prkar2b
Huwe1	4.51704e-05	-0.785929	0.048	0.327	1	14	Huwe1
Prkcb	4.52205e-05	-0.745731	0.095	0.396	1	14	Prkcb
Tmeff2	4.52516e-05	-0.89344	0.024	0.282	1	14	Tmeff2
Rac1	4.52846e-05	-0.643821	0.357	0.694	1	14	Rac1
Tceal1	4.55743e-05	-0.40817	0.024	0.238	1	14	Tceal1
Spire1	4.56558e-05	-0.560299	0	0.189	1	14	Spire1
Sub1	4.60083e-05	-0.797967	0.143	0.468	1	14	Sub1
Hipk1	4.65724e-05	-0.774076	0.024	0.281	1	14	Hipk1
Lix1	4.66502e-05	-0.516654	0	0.189	1	14	Lix1
Lyrm9	4.69863e-05	-0.488624	0	0.189	1	14	Lyrm9
Tprgl	4.71605e-05	-0.425365	0.143	0.447	1	14	Tprgl
Rab11a	4.76049e-05	-0.817712	0.048	0.322	1	14	Rab11a
Nbr1	4.78749e-05	-0.378999	0.095	0.353	1	14	Nbr1
Cops8	4.83262e-05	-0.296268	0.095	0.341	1	14	Cops8
Hsd3b2	4.83403e-05	-0.416955	0.143	0.438	1	14	Hsd3b2
Fundc1	4.86009e-05	-0.643792	0.024	0.277	1	14	Fundc1
Dfna5	4.87031e-05	-0.483429	0	0.188	1	14	Dfna5
Psmc3	4.90578e-05	-0.314563	0.048	0.261	1	14	Psmc3
Ahi1	4.92508e-05	-0.901651	0.071	0.366	1	14	Ahi1
Ttf1	4.93663e-05	-0.469744	0.19	0.498	1	14	Ttf1
Syngr1	4.94587e-05	-0.718982	0.024	0.278	1	14	Syngr1
Zfp422	4.95153e-05	0.40552	0.048	0.122	1	14	Zfp422
Camk2n2	5.02213e-05	-0.467439	0.024	0.253	1	14	Camk2n2
Armt1	5.04062e-05	-0.386496	0.119	0.391	1	14	Armt1
Aars	5.07389e-05	-0.433276	0.095	0.36	1	14	Aars
Acat2	5.08446e-05	-0.540534	0	0.187	1	14	Acat2
Jade1	5.09144e-05	1.14767	0.048	0.112	1	14	Jade1
Srpk2	5.11552e-05	-0.407261	0.071	0.337	1	14	Srpk2
Cndp2	5.15788e-05	-0.533541	0	0.187	1	14	Cndp2
Pnrc1	5.17452e-05	0.848391	0.357	0.234	1	14	Pnrc1
Ndufv1	5.19498e-05	-0.504997	0	0.187	1	14	Ndufv1
Dnal1	5.19498e-05	-0.475476	0	0.187	1	14	Dnal1
Wrb	5.19498e-05	-0.525066	0	0.187	1	14	Wrb
Clns1a	5.19705e-05	-0.482681	0.071	0.341	1	14	Clns1a
Antxr2	5.19943e-05	0.536027	0.119	0.007	1	14	Antxr2
Ube2v1	5.20153e-05	-0.676328	0.095	0.398	1	14	Ube2v1
Ddit4	5.24519e-05	1.05961	0.262	0.082	1	14	Ddit4
Tia1	5.25145e-05	-0.778807	0.095	0.401	1	14	Tia1
Dnm1	5.31162e-05	-0.607529	0.024	0.277	1	14	Dnm1
Cox5b	5.31847e-05	-0.555674	0.167	0.481	1	14	Cox5b
Hivep3	5.31909e-05	0.326796	0.024	0.108	1	14	Hivep3
Metap2	5.32317e-05	-0.729341	0.071	0.364	1	14	Metap2
Pnmal1	5.33532e-05	-0.693007	0.024	0.279	1	14	Pnmal1
Fastk	5.346e-05	-0.479603	0	0.186	1	14	Fastk
Ssb	5.41318e-05	-0.264703	0.095	0.331	1	14	Ssb
Mfsd4a	5.42312e-05	-0.524216	0	0.186	1	14	Mfsd4a
Ralyl	5.42312e-05	-0.458396	0	0.186	1	14	Ralyl
Pcp4l1	5.46209e-05	-0.911553	0	0.186	1	14	Pcp4l1
Dcaf8	5.52001e-05	-0.684887	0.048	0.323	1	14	Dcaf8
Gdpd1	5.54085e-05	-0.497242	0	0.186	1	14	Gdpd1
Phf14	5.54085e-05	-0.537889	0	0.186	1	14	Phf14
Drg2	5.59841e-05	0.419337	0.048	0.111	1	14	Drg2
Mysm1	5.62073e-05	-0.53902	0	0.186	1	14	Mysm1
Trappc11	5.70174e-05	-0.570606	0	0.185	1	14	Trappc11
Hnrnpa3	5.71211e-05	-0.469114	0.31	0.635	1	14	Hnrnpa3
Mmgt1	5.74267e-05	-0.59401	0	0.185	1	14	Mmgt1
Pllp	5.74267e-05	-1.34063	0	0.185	1	14	Pllp
Sel1l3	5.74267e-05	-0.513875	0	0.185	1	14	Sel1l3
Nktr	5.81623e-05	-0.784405	0.048	0.322	1	14	Nktr
Cxcl16	5.81897e-05	0.764575	0.167	0.019	1	14	Cxcl16
Epn1	5.84367e-05	-0.404495	0.071	0.329	1	14	Epn1
Rmi2	5.8672e-05	-0.521508	0	0.185	1	14	Rmi2
Cltc	5.8935e-05	-0.516404	0.262	0.585	1	14	Cltc
Pigt	5.99438e-05	-0.519126	0	0.184	1	14	Pigt
Nlgn1	6.03737e-05	-0.599238	0	0.184	1	14	Nlgn1
Vav2	6.0797e-05	-0.331832	0.048	0.277	1	14	Vav2
Cnot7	6.15651e-05	-0.643349	0.024	0.274	1	14	Cnot7
Mef2a	6.20644e-05	0.620308	0.19	0.281	1	14	Mef2a
Gm7609	6.23298e-05	-0.795943	0.19	0.52	1	14	Gm7609
Deb1	6.30175e-05	-0.491595	0	0.183	1	14	Deb1
Dcaf7	6.30281e-05	-0.629952	0.071	0.353	1	14	Dcaf7
Aifm3	6.37633e-05	-0.673534	0.048	0.317	1	14	Aifm3
Sec62	6.37953e-05	0.349318	0.429	0.562	1	14	Sec62
Klhl1	6.39238e-05	-0.498172	0	0.183	1	14	Klhl1
Fbxw11	6.43633e-05	-0.261858	0.048	0.263	1	14	Fbxw11
Lcmt1	6.43817e-05	-0.466221	0	0.183	1	14	Lcmt1
Spop	6.519e-05	-0.818815	0.143	0.46	1	14	Spop
Rgs6	6.53072e-05	-0.494997	0	0.183	1	14	Rgs6
Nr1d2	6.6356e-05	0.604963	0.214	0.292	1	14	Nr1d2
Nol4	6.6622e-05	-0.716807	0.024	0.274	1	14	Nol4
Neurl1a	6.672e-05	-0.484281	0	0.182	1	14	Neurl1a
Maea	6.68272e-05	-0.437506	0.071	0.327	1	14	Maea
Hnrnpl	6.71203e-05	0.316869	0.214	0.372	1	14	Hnrnpl
Pdk2	6.71976e-05	-0.486824	0	0.182	1	14	Pdk2
Rab39b	6.76785e-05	-0.508381	0	0.182	1	14	Rab39b
Nfe2l1	6.78446e-05	-0.376655	0.119	0.385	1	14	Nfe2l1
Fzd2	6.8132e-05	0.768769	0.119	0.009	1	14	Fzd2
Tspan33	6.81628e-05	-0.483437	0	0.182	1	14	Tspan33
Ik	6.82039e-05	-0.354715	0.095	0.343	1	14	Ik
Mrpl20	6.84664e-05	-0.428384	0.048	0.284	1	14	Mrpl20
Bicd1	6.85479e-05	-0.692553	0.024	0.272	1	14	Bicd1
Stradb	6.9451e-05	0.258201	0.024	0.106	1	14	Stradb
Nradd	6.95176e-05	0.564662	0.119	0.018	1	14	Nradd
Syt5	6.96362e-05	-0.484985	0	0.182	1	14	Syt5
Dnajb2	7.00695e-05	0.506472	0.071	0.184	1	14	Dnajb2
Pclo	7.00743e-05	-0.511829	0.048	0.3	1	14	Pclo
Mid1ip1	7.05889e-05	0.500567	0.31	0.364	1	14	Mid1ip1
Rps19	7.07052e-05	0.348989	0.548	0.632	1	14	Rps19
Rps23	7.19559e-05	0.429657	0.667	0.75	1	14	Rps23
Zfp638	7.26034e-05	-0.500452	0.048	0.288	1	14	Zfp638
Rabl6	7.31967e-05	-0.474553	0	0.181	1	14	Rabl6
Cyc1	7.35393e-05	-0.368353	0.095	0.359	1	14	Cyc1
Unc13d	7.36339e-05	-0.639607	0.095	0.385	1	14	Unc13d
Mif	7.43789e-05	-0.4646	0.048	0.3	1	14	Mif
X1500011K16Rik	7.47768e-05	-0.510145	0	0.18	1	14	X1500011K16Rik
Ptpn11	7.50283e-05	-0.676453	0.071	0.352	1	14	Ptpn11
Gadd45b	7.53259e-05	0.943007	0.357	0.12	1	14	Gadd45b
Map2k4	7.56924e-05	-0.35328	0.048	0.262	1	14	Map2k4
Ap2a1	7.58487e-05	-0.485136	0	0.18	1	14	Ap2a1
Tmcc1	7.63569e-05	-0.418819	0.024	0.231	1	14	Tmcc1
Map9	7.63903e-05	-0.52355	0	0.18	1	14	Map9
Tmbim6	7.66665e-05	-0.450991	0.381	0.703	1	14	Tmbim6
Psmd6	7.69357e-05	-0.464231	0	0.18	1	14	Psmd6
Dars	7.73865e-05	0.421867	0.071	0.148	1	14	Dars
Ralgapb	7.80381e-05	-0.518143	0	0.179	1	14	Ralgapb
Adamts13	7.80381e-05	-0.582514	0	0.179	1	14	Adamts13
Gpi1	7.85731e-05	-0.683102	0.143	0.456	1	14	Gpi1
Lpin1	7.96578e-05	0.454805	0.167	0.263	1	14	Lpin1
Reps2	7.97206e-05	-0.454524	0	0.179	1	14	Reps2
Necap1	8.00872e-05	-0.5792	0.071	0.343	1	14	Necap1
Cluh	8.02894e-05	-0.469456	0	0.179	1	14	Cluh
Dapk1	8.02894e-05	-0.495752	0	0.179	1	14	Dapk1
Psma7	8.03532e-05	0.377973	0.214	0.327	1	14	Psma7
Ddb1	8.08083e-05	-0.394581	0.071	0.325	1	14	Ddb1
Tnrc6a	8.10761e-05	-0.684706	0.071	0.351	1	14	Tnrc6a
Tsn	8.17657e-05	-0.818734	0.167	0.483	1	14	Tsn
Nae1	8.17928e-05	0.322214	0.095	0.188	1	14	Nae1
Calm1	8.27552e-05	-0.296227	0.452	0.76	1	14	Calm1
Cct8	8.35659e-05	-0.339698	0.19	0.471	1	14	Cct8
Nudt21	8.37864e-05	-0.507186	0	0.178	1	14	Nudt21
Trim66	8.43836e-05	-0.413209	0	0.178	1	14	Trim66
Ptprj	8.43836e-05	-0.532641	0	0.178	1	14	Ptprj
Rdh10	8.49332e-05	0.783759	0.143	0.049	1	14	Rdh10
Ttc4	8.52532e-05	0.468593	0.071	0.139	1	14	Ttc4
Bcat2	8.5727e-05	0.552143	0.119	0.017	1	14	Bcat2
Phlda1	8.57628e-05	1.01257	0.333	0.145	1	14	Phlda1
Ndufa8	8.68498e-05	-0.313249	0.048	0.263	1	14	Ndufa8
Tbcb	8.70582e-05	-0.262452	0.071	0.28	1	14	Tbcb
Rbbp7	8.82754e-05	0.407651	0.214	0.272	1	14	Rbbp7
Colgalt1	8.83047e-05	0.733604	0.238	0.176	1	14	Colgalt1
Papolg	8.90213e-05	-0.389534	0.048	0.27	1	14	Papolg
Jade2	8.9314e-05	-0.510942	0	0.177	1	14	Jade2
Brd3	8.9314e-05	-0.493528	0	0.177	1	14	Brd3
Calb1	8.9314e-05	-0.898928	0	0.177	1	14	Calb1
Samhd1	8.96043e-05	-0.6851	0.048	0.311	1	14	Samhd1
Fbll1	8.99498e-05	-0.416488	0	0.177	1	14	Fbll1
Atp9a	9.02006e-05	-0.372256	0.119	0.385	1	14	Atp9a
Wdr31	9.03072e-05	-0.385179	0.119	0.375	1	14	Wdr31
Creld1	9.03499e-05	0.264454	0.071	0.145	1	14	Creld1
Ptprz1	9.18719e-05	-1.52399	0.048	0.312	1	14	Ptprz1
Npc1	9.18775e-05	-0.582177	0.071	0.342	1	14	Npc1
Pgam1	9.22901e-05	-0.514597	0.238	0.566	1	14	Pgam1
Atp6v1h	9.25379e-05	-0.491933	0	0.176	1	14	Atp6v1h
Fuca2	9.31963e-05	-0.498765	0	0.176	1	14	Fuca2
Sfxn3	9.45269e-05	-0.451447	0	0.176	1	14	Sfxn3
Sh3kbp1	9.51991e-05	-0.534086	0	0.176	1	14	Sh3kbp1
Rab10	9.51994e-05	-0.289381	0.19	0.477	1	14	Rab10
Grk5	9.55069e-05	0.691799	0.119	0.023	1	14	Grk5
Slc2a13	9.59728e-05	-0.760149	0.048	0.313	1	14	Slc2a13
Atxn2	9.61504e-05	-0.367998	0.048	0.266	1	14	Atxn2
Btbd1	9.63192e-05	-0.250081	0.119	0.356	1	14	Btbd1
Gapvd1	9.64533e-05	-0.357149	0.143	0.406	1	14	Gapvd1
Znrf1	9.65578e-05	-0.492942	0	0.175	1	14	Znrf1
Pum1	9.66724e-05	-0.304819	0.071	0.293	1	14	Pum1
Rpn2	9.70357e-05	0.386229	0.286	0.358	1	14	Rpn2
Mapk9	9.71506e-05	-0.613576	0.024	0.265	1	14	Mapk9
Tmem255a	9.72442e-05	-0.670013	0	0.175	1	14	Tmem255a
Tbl1x	9.84961e-05	-0.442613	0.024	0.24	1	14	Tbl1x
Zdhhc17	9.86084e-05	-0.541707	0.024	0.24	1	14	Zdhhc17
Aldh5a1	9.86315e-05	-0.50107	0	0.175	1	14	Aldh5a1
Tubb4b	9.88051e-05	0.31618	0.19	0.316	1	14	Tubb4b
Frs3	9.93324e-05	-0.49768	0	0.175	1	14	Frs3
St13	9.94469e-05	0.381273	0.238	0.387	1	14	St13
Gtf2h1	9.94574e-05	0.28055	0.071	0.157	1	14	Gtf2h1
Cox6a1	9.94727e-05	-0.287122	0.286	0.573	1	14	Cox6a1
H2afy	9.96913e-05	-0.324489	0.19	0.475	1	14	H2afy
Gcsh	0.000100038	-0.492345	0	0.175	1	14	Gcsh
Dnm3	0.000100038	-0.516278	0	0.175	1	14	Dnm3
Sec24d	0.000100304	0.737869	0.214	0.084	1	14	Sec24d
Tead1	0.000100641	0.694144	0.19	0.033	1	14	Tead1
Slc7a1	0.000100749	-0.626992	0	0.175	1	14	Slc7a1
Fzd8	0.00010094	0.466571	0.143	0.013	1	14	Fzd8
Ppp5c	0.000101139	-0.610285	0.024	0.266	1	14	Ppp5c
Nrxn2	0.000101681	-0.616556	0.19	0.505	1	14	Nrxn2
Rps14	0.000101915	0.266802	0.548	0.67	1	14	Rps14
Pcnp	0.000102192	-0.533259	0.143	0.434	1	14	Pcnp
Rab3gap1	0.000103311	-0.642148	0.024	0.265	1	14	Rab3gap1
Ap2a2	0.000103485	-0.570523	0.024	0.262	1	14	Ap2a2
Eif2b2	0.000103642	-0.463279	0	0.174	1	14	Eif2b2
Fmn2	0.000103642	-0.535558	0	0.174	1	14	Fmn2
Hspa9	0.000104376	-0.368967	0.167	0.446	1	14	Hspa9
Gpr37l1	0.000104378	-1.64769	0	0.174	1	14	Gpr37l1
Sar1b	0.000104498	-0.588716	0.071	0.34	1	14	Sar1b
Ran	0.000105126	-0.5964	0.286	0.613	1	14	Ran
Calm2	0.000105635	-0.609296	0.429	0.727	1	14	Calm2
Prpf40a	0.000107251	0.26328	0.071	0.161	1	14	Prpf40a
Atp2b3	0.000107373	-0.480971	0	0.173	1	14	Atp2b3
Gm42372	0.000108902	-0.430389	0	0.173	1	14	Gm42372
Gpr139	0.000109674	-0.517548	0	0.173	1	14	Gpr139
Srebf2	0.000110092	-0.686201	0.095	0.38	1	14	Srebf2
Robo3	0.000110452	-0.480572	0	0.173	1	14	Robo3
Fam234b	0.000110452	-0.530663	0	0.173	1	14	Fam234b
Dazap1	0.000110452	-0.517718	0	0.173	1	14	Dazap1
Tpd52	0.000111179	-0.741595	0.024	0.264	1	14	Tpd52
Add2	0.000111235	-0.448557	0	0.173	1	14	Add2
Emc7	0.000111733	-0.380424	0.143	0.411	1	14	Emc7
Dbi	0.000112151	-1.21012	0.095	0.386	1	14	Dbi
Clock	0.000112565	-0.675375	0.048	0.308	1	14	Clock
Pfkl	0.000112818	-0.448163	0	0.172	1	14	Pfkl
Zmat3	0.000113618	-0.450569	0	0.172	1	14	Zmat3
Mrps5	0.000113618	-0.473217	0	0.172	1	14	Mrps5
Pear1	0.000114005	0.784153	0.167	0.02	1	14	Pear1
Tubb2a	0.00011417	-0.603762	0.167	0.472	1	14	Tubb2a
Gak	0.000115234	-0.463198	0	0.172	1	14	Gak
Mfn2	0.000115418	-0.655748	0.071	0.348	1	14	Mfn2
Pycr2	0.000115652	0.451487	0.095	0.271	1	14	Pycr2
Serbp1	0.000115793	-0.433335	0.286	0.584	1	14	Serbp1
Asic1	0.000116051	-0.521172	0	0.172	1	14	Asic1
Tac1	0.000116873	-0.893241	0	0.172	1	14	Tac1
Cbln1	0.000117701	-0.601107	0	0.172	1	14	Cbln1
Smap1	0.000118466	-0.392244	0.024	0.222	1	14	Smap1
Cmtm4	0.000119374	-0.554003	0	0.171	1	14	Cmtm4
Nfe2l2	0.00011946	0.721631	0.286	0.069	1	14	Nfe2l2
Snrnp70	0.000119551	0.260377	0.214	0.412	1	14	Snrnp70
Rtcb	0.000119779	0.37318	0.167	0.326	1	14	Rtcb
Naa15	0.000121071	-0.527493	0	0.171	1	14	Naa15
Asns	0.000121071	-0.406801	0	0.171	1	14	Asns
Tomm22	0.000122215	-0.649373	0.024	0.261	1	14	Tomm22
Psma1	0.000123247	-0.291523	0.119	0.355	1	14	Psma1
Git1	0.00012366	-0.482342	0	0.171	1	14	Git1
Smap2	0.000124348	-0.684925	0.024	0.262	1	14	Smap2
Parva	0.000124381	0.953477	0.167	0.048	1	14	Parva
S100a16	0.000124536	-1.24367	0	0.171	1	14	S100a16
Golga4	0.000124536	-0.505108	0	0.171	1	14	Golga4
Ptms	0.000125156	-0.517534	0.262	0.575	1	14	Ptms
Tspyl1	0.000126312	-0.616964	0.119	0.407	1	14	Tspyl1
Tmem59l	0.000127028	-0.567868	0.024	0.257	1	14	Tmem59l
Bag1	0.00012862	-0.504386	0.071	0.326	1	14	Bag1
Col16a1	0.000129225	0.656495	0.214	0.106	1	14	Col16a1
Brinp1	0.000129916	-0.604148	0	0.17	1	14	Brinp1
Fam134a	0.000130593	-0.649048	0.024	0.26	1	14	Fam134a
Slc25a23	0.000130779	-0.315603	0.048	0.254	1	14	Slc25a23
Trim37	0.000130952	-0.603217	0.024	0.261	1	14	Trim37
Tmed4	0.000131154	0.462251	0.214	0.328	1	14	Tmed4
Fgf1	0.00013176	-0.654445	0	0.169	1	14	Fgf1
Cntnap4	0.00013176	-0.463818	0	0.169	1	14	Cntnap4
Lbh	0.000131902	-0.3644	0.143	0.405	1	14	Lbh
Adcy5	0.000132	0.608898	0.238	0.053	1	14	Adcy5
Bpgm	0.00013257	-0.766504	0.024	0.261	1	14	Bpgm
Babam1	0.000132599	-0.608089	0.024	0.261	1	14	Babam1
Il6st	0.000133643	0.805604	0.31	0.144	1	14	Il6st
Atp6v0b	0.000133658	-0.466749	0.167	0.46	1	14	Atp6v0b
Pdk1	0.000133753	0.617282	0.19	0.111	1	14	Pdk1
Ywhaz	0.000134699	-0.333163	0.333	0.643	1	14	Ywhaz
Impdh2	0.000135517	1.05588	0.19	0.107	1	14	Impdh2
Sap18	0.000135524	-0.480008	0	0.169	1	14	Sap18
X1600014C10Rik	0.000137446	-0.435794	0	0.169	1	14	X1600014C10Rik
Asb1	0.000137446	-0.513236	0	0.169	1	14	Asb1
Taf11	0.000137446	-0.485431	0	0.169	1	14	Taf11
Enho	0.000137878	-0.615985	0.024	0.257	1	14	Enho
X2310061I04Rik	0.000139395	-0.427066	0	0.168	1	14	X2310061I04Rik
Eif5a2	0.000139395	-0.44603	0	0.168	1	14	Eif5a2
Hspa8	0.000139461	-0.510782	0.619	0.846	1	14	Hspa8
Gps1	0.000140151	-0.439094	0.048	0.283	1	14	Gps1
Pabpc4	0.000140557	0.391658	0.048	0.106	1	14	Pabpc4
Rpl35a	0.000140736	0.499646	0.571	0.625	1	14	Rpl35a
Fkbp1a	0.000141	-0.649212	0.286	0.608	1	14	Fkbp1a
Ier3	0.000141146	1.04832	0.286	0.083	1	14	Ier3
Sfpq	0.000141691	-0.676019	0.095	0.375	1	14	Sfpq
Slc4a10	0.000142368	-0.464806	0	0.168	1	14	Slc4a10
Mrpl34	0.000142455	-0.536626	0.024	0.253	1	14	Mrpl34
Eif2s2	0.000142932	-0.720541	0.119	0.415	1	14	Eif2s2
Ms4a6c	0.000143373	-0.472096	0	0.168	1	14	Ms4a6c
Psmd14	0.000144359	-0.6795	0.024	0.259	1	14	Psmd14
Dscam	0.000144385	-0.560596	0	0.168	1	14	Dscam
Cbx6	0.000145707	-0.600133	0.19	0.497	1	14	Cbx6
Slc25a22	0.000145791	-0.321343	0.048	0.25	1	14	Slc25a22
Dda1	0.000146172	-0.338055	0.024	0.215	1	14	Dda1
Stau2	0.000146431	-0.474704	0	0.167	1	14	Stau2
Prps1	0.000147402	-0.58445	0.024	0.254	1	14	Prps1
Ncbp3	0.000147464	-0.469933	0	0.167	1	14	Ncbp3
Mrps9	0.000147464	-0.468752	0	0.167	1	14	Mrps9
Minpp1	0.000147976	0.30626	0.119	0.183	1	14	Minpp1
Polr2c	0.000148342	-0.486481	0.024	0.235	1	14	Polr2c
Ap4s1	0.000148364	-0.658267	0.024	0.259	1	14	Ap4s1
Scyl1	0.000148704	0.909599	0.214	0.12	1	14	Scyl1
Uhrf1bp1l	0.000149995	-0.579059	0.048	0.291	1	14	Uhrf1bp1l
Rnf187	0.000150162	-0.770112	0.095	0.38	1	14	Rnf187
Nr4a3	0.000153765	0.779056	0.214	0.116	1	14	Nr4a3
Pbx4	0.000153815	-0.41341	0	0.167	1	14	Pbx4
Rabgap1l	0.000154167	-0.509847	0.048	0.285	1	14	Rabgap1l
Tmcc2	0.000154481	-0.551816	0.048	0.291	1	14	Tmcc2
Sh3bp5	0.000154785	0.8373	0.286	0.135	1	14	Sh3bp5
Sod3	0.000154995	0.277886	0.143	0.02	1	14	Sod3
Zmat2	0.000155245	-0.359427	0.071	0.3	1	14	Zmat2
Csnk1a1	0.000157037	-0.367948	0.19	0.486	1	14	Csnk1a1
Naa60	0.000157731	-0.315255	0.095	0.317	1	14	Naa60
Cdh22	0.000158198	-0.44571	0	0.166	1	14	Cdh22
Clip4	0.000158198	-0.471458	0	0.166	1	14	Clip4
Wdr26	0.000158796	-0.322654	0.167	0.428	1	14	Wdr26
Xpr1	0.000160255	-0.458397	0.071	0.314	1	14	Xpr1
H13	0.00016092	-0.344293	0.119	0.363	1	14	H13
Sox10	0.000162703	-1.30199	0	0.165	1	14	Sox10
Cep170	0.000162752	-0.66408	0.071	0.34	1	14	Cep170
Ica1	0.000163849	-0.408594	0	0.165	1	14	Ica1
Arfip2	0.000163849	-0.42776	0	0.165	1	14	Arfip2
Micu1	0.000163849	-0.468217	0	0.165	1	14	Micu1
Ckb	0.000164204	-0.56729	0.286	0.599	1	14	Ckb
Chd5	0.000165003	-0.403163	0	0.165	1	14	Chd5
Crbn	0.000165003	-0.451204	0	0.165	1	14	Crbn
Dpy19l1	0.000165003	-0.743183	0	0.165	1	14	Dpy19l1
Nppa	0.000166165	-0.505443	0	0.165	1	14	Nppa
Cplx2	0.000166165	-0.497355	0	0.165	1	14	Cplx2
Ggt5	0.000167314	0.70594	0.143	0.015	1	14	Ggt5
Mgat4a	0.000167334	-0.531251	0	0.165	1	14	Mgat4a
Cables1	0.000168512	-0.501197	0	0.165	1	14	Cables1
Asrgl1	0.000168512	-0.648296	0	0.165	1	14	Asrgl1
Scube3	0.000168512	-0.447073	0	0.165	1	14	Scube3
Rbm28	0.000169343	0.435369	0.071	0.163	1	14	Rbm28
Nacc2	0.000169411	-0.44663	0.024	0.219	1	14	Nacc2
Lypla2	0.000169593	-0.431522	0.024	0.231	1	14	Lypla2
Enoph1	0.000169698	-0.521686	0	0.165	1	14	Enoph1
Slc25a27	0.000170893	-0.447455	0	0.165	1	14	Slc25a27
Prnp	0.000171441	-0.520604	0.286	0.59	1	14	Prnp
Uqcr11	0.000171501	-0.45529	0.119	0.383	1	14	Uqcr11
Sumo3	0.000172274	-0.653347	0.071	0.335	1	14	Sumo3
Aig1	0.00017288	-0.619652	0.048	0.297	1	14	Aig1
Mecp2	0.000173378	-0.63127	0.095	0.373	1	14	Mecp2
Akt2	0.00017439	0.741867	0.167	0.086	1	14	Akt2
Imp4	0.000174525	-0.492073	0	0.164	1	14	Imp4
Rasgrp1	0.000175753	-0.453607	0	0.164	1	14	Rasgrp1
B230217C12Rik	0.000176989	-0.409665	0	0.164	1	14	B230217C12Rik
Ppm1b	0.000179277	-0.483379	0.024	0.232	1	14	Ppm1b
Acsl6	0.000180116	-0.582166	0.024	0.238	1	14	Acsl6
Sstr2	0.000180749	-0.443788	0	0.163	1	14	Sstr2
Dr1	0.000180749	-0.450366	0	0.163	1	14	Dr1
X0610012G03Rik	0.000181159	-0.313533	0.071	0.295	1	14	X0610012G03Rik
Chrnb2	0.00018202	-0.396705	0	0.163	1	14	Chrnb2
Ube2e2	0.000185884	-0.493606	0	0.163	1	14	Ube2e2
Scamp1	0.000186114	-0.497765	0.167	0.461	1	14	Scamp1
Vps26b	0.000187195	-0.448964	0.024	0.23	1	14	Vps26b
Aldh2	0.000187818	0.652667	0.333	0.24	1	14	Aldh2
Ginm1	0.000187904	0.819259	0.238	0.096	1	14	Ginm1
Chchd2	0.000188107	-0.4898	0.476	0.771	1	14	Chchd2
Grik5	0.000188505	-0.433277	0	0.163	1	14	Grik5
Spg21	0.000188791	0.576133	0.095	0.212	1	14	Spg21
Zfp36	0.000189503	0.679903	0.333	0.098	1	14	Zfp36
Gbas	0.00019131	-0.671728	0.048	0.298	1	14	Gbas
X0610011F06Rik	0.000193857	-0.45694	0	0.162	1	14	X0610011F06Rik
Rnf114	0.000196162	-0.587283	0.024	0.253	1	14	Rnf114
Dbnl	0.000197519	-0.625369	0.024	0.253	1	14	Dbnl
Rbm5	0.000197578	-0.263141	0.095	0.307	1	14	Rbm5
Prrt2	0.000197969	-0.426979	0	0.162	1	14	Prrt2
Smyd3	0.000197969	-0.4523	0	0.162	1	14	Smyd3
Ildr2	0.000199358	-0.566442	0	0.162	1	14	Ildr2
Zfp451	0.000200757	-0.467606	0	0.161	1	14	Zfp451
Wdr83os	0.000201914	-0.279389	0.048	0.247	1	14	Wdr83os
Txnip	0.000202554	0.599007	0.286	0.075	1	14	Txnip
Tmx1	0.000205855	-0.327217	0.048	0.246	1	14	Tmx1
Camk2g	0.000205926	-0.561311	0.048	0.285	1	14	Camk2g
Camta1	0.000206355	-0.706252	0.071	0.336	1	14	Camta1
Gm17018	0.000206451	-0.447526	0	0.161	1	14	Gm17018
Sipa1	0.000207272	0.837404	0.19	0.051	1	14	Sipa1
Tma16	0.000207899	-0.45216	0	0.161	1	14	Tma16
Mat2b	0.000209096	-0.589939	0.071	0.33	1	14	Mat2b
Tor1aip2	0.00020994	0.707423	0.31	0.228	1	14	Tor1aip2
Mapk8	0.000210356	-0.525866	0.048	0.282	1	14	Mapk8
Rab9b	0.000210825	-0.418624	0	0.161	1	14	Rab9b
Camk1	0.000211602	-0.255567	0.071	0.275	1	14	Camk1
Jph3	0.000212303	-0.447837	0	0.16	1	14	Jph3
Ndst1	0.000213317	-0.667601	0.048	0.291	1	14	Ndst1
Dpysl5	0.000213791	-0.395079	0	0.16	1	14	Dpysl5
Ublcp1	0.000214263	-0.569788	0.024	0.244	1	14	Ublcp1
Ctxn1	0.00021529	-0.492504	0	0.16	1	14	Ctxn1
Plppr1	0.00021529	-0.508943	0	0.16	1	14	Plppr1
Itpa	0.000216692	-0.457619	0.048	0.273	1	14	Itpa
Ccp110	0.000216798	-0.602124	0	0.16	1	14	Ccp110
Pgp	0.000216798	-0.4591	0	0.16	1	14	Pgp
Usp50	0.000218275	0.271046	0.143	0.249	1	14	Usp50
Tnfaip1	0.000218648	0.891748	0.286	0.199	1	14	Tnfaip1
Pex5l	0.000219847	-0.640172	0	0.16	1	14	Pex5l
Nomo1	0.000219847	-0.499684	0	0.16	1	14	Nomo1
Dzip3	0.000219886	-0.546036	0.048	0.288	1	14	Dzip3
Bach1	0.000220004	0.899127	0.19	0.069	1	14	Bach1
Socs2	0.0002245	-0.457747	0	0.159	1	14	Socs2
Ypel3	0.000224933	-0.328121	0.143	0.395	1	14	Ypel3
Dck	0.000226072	-0.454196	0	0.159	1	14	Dck
Atxn1	0.000226072	-0.490213	0	0.159	1	14	Atxn1
Adamts1	0.000227198	0.550317	0.262	0.063	1	14	Adamts1
Abca2	0.000227654	-0.852363	0.024	0.25	1	14	Abca2
Baz2b	0.000227655	-0.589827	0	0.159	1	14	Baz2b
D3Ertd254e	0.000227655	-0.466647	0	0.159	1	14	D3Ertd254e
Mgea5	0.000228793	-0.495769	0.071	0.321	1	14	Mgea5
Taf1	0.000230404	-0.636528	0.024	0.249	1	14	Taf1
Uqcrfs1	0.000232715	-0.710049	0.071	0.336	1	14	Uqcrfs1
Exoc4	0.000233995	-0.495688	0.024	0.23	1	14	Exoc4
Bcl2l2	0.000234089	-0.392754	0.095	0.338	1	14	Bcl2l2
Hook1	0.000234097	-0.41851	0	0.158	1	14	Hook1
Plpp3	0.000235621	0.558402	0.452	0.18	1	14	Plpp3
Gga3	0.000235736	-0.439894	0	0.158	1	14	Gga3
Tspan4	0.000236113	0.872284	0.19	0.06	1	14	Tspan4
Maneal	0.000237385	-0.439333	0	0.158	1	14	Maneal
Chchd4	0.000237385	-0.419074	0	0.158	1	14	Chchd4
Stoml1	0.000237385	-0.459022	0	0.158	1	14	Stoml1
Ppp1r1b	0.000238497	-0.479654	0.024	0.228	1	14	Ppp1r1b
Chrnb3	0.000239046	-0.576956	0	0.158	1	14	Chrnb3
Cpne9	0.000240618	-0.650653	0.048	0.277	1	14	Cpne9
Snx32	0.000240719	-0.395309	0	0.158	1	14	Snx32
Spryd3	0.0002408	-0.29056	0.024	0.199	1	14	Spryd3
Sf3b2	0.000241745	-0.545477	0.143	0.424	1	14	Sf3b2
Cadm4	0.000242473	-0.75076	0.048	0.291	1	14	Cadm4
Etv1	0.000243159	-0.380191	0.071	0.304	1	14	Etv1
Fam20b	0.000243858	-0.335251	0.024	0.207	1	14	Fam20b
Mrfap1	0.000246013	-0.355823	0.476	0.764	1	14	Mrfap1
Atf4	0.000246612	0.261279	0.31	0.451	1	14	Atf4
Tmem222	0.000247872	-0.444637	0.048	0.27	1	14	Tmem222
Pdpk1	0.000248699	-0.735215	0.048	0.294	1	14	Pdpk1
Akain1	0.000249254	-0.435546	0	0.157	1	14	Akain1
Syt17	0.000250679	-0.28452	0.024	0.194	1	14	Syt17
Tmem65	0.000250997	-0.483264	0	0.157	1	14	Tmem65
Susd6	0.000252523	0.72073	0.143	0.08	1	14	Susd6
Ptprr	0.000254518	-0.42589	0	0.157	1	14	Ptprr
Rpl37	0.00025503	0.307256	0.524	0.598	1	14	Rpl37
Lrrn1	0.000256297	-0.77531	0	0.157	1	14	Lrrn1
Dpp9	0.000256297	-0.444616	0	0.157	1	14	Dpp9
Fdft1	0.000256871	-0.460807	0.024	0.222	1	14	Fdft1
Rnf112	0.000258087	-0.471043	0	0.157	1	14	Rnf112
Mbd6	0.000258437	0.305194	0.071	0.159	1	14	Mbd6
Msx1	0.000258923	0.638556	0.143	0.016	1	14	Msx1
Pgm2	0.000259311	-0.62027	0.048	0.288	1	14	Pgm2
Gars	0.000259591	-0.592667	0.024	0.246	1	14	Gars
Srp19	0.000259864	-0.656403	0.024	0.248	1	14	Srp19
Nmd3	0.000261706	-0.413176	0	0.156	1	14	Nmd3
Uba6	0.000261706	-0.465996	0	0.156	1	14	Uba6
Btbd10	0.000261706	-0.472216	0	0.156	1	14	Btbd10
Lrrc17	0.00026187	-0.358114	0.024	0.21	1	14	Lrrc17
Atp5a1	0.000262927	-0.672988	0.381	0.674	1	14	Atp5a1
Pnmal2	0.000264488	-0.884461	0.214	0.502	1	14	Pnmal2
Pura	0.000265906	-0.48917	0.19	0.48	1	14	Pura
Celf2	0.000268996	-0.512541	0.262	0.568	1	14	Celf2
Brms1l	0.000270588	-0.268818	0.048	0.241	1	14	Brms1l
Cx3cr1	0.000270973	-1.4471	0	0.156	1	14	Cx3cr1
Slc7a8	0.000270973	-0.61736	0	0.156	1	14	Slc7a8
Grin1	0.000270973	-0.362095	0	0.156	1	14	Grin1
Bcl6	0.000271007	0.854142	0.19	0.033	1	14	Bcl6
Impdh1	0.000271135	-0.644341	0.024	0.246	1	14	Impdh1
Rheb	0.000272037	-0.361685	0.214	0.494	1	14	Rheb
Gpm6b	0.00027272	-1.09298	0.262	0.571	1	14	Gpm6b
Gm14964	0.000272747	0.481734	0.119	0.01	1	14	Gm14964
2019-09-06	0.000272989	-0.320784	0.048	0.24	1	14	2019-09-06
Slmo2	0.000273137	-0.336298	0.024	0.207	1	14	Slmo2
Wdr13	0.000274209	-0.380284	0.048	0.256	1	14	Wdr13
Il1rap	0.000274769	-0.592909	0	0.155	1	14	Il1rap
Rab3c	0.000276687	-0.789967	0	0.155	1	14	Rab3c
Bpnt1	0.000276939	-0.418373	0.048	0.264	1	14	Bpnt1
Mt1	0.000278076	-1.08779	0.071	0.33	1	14	Mt1
Ric3	0.000278618	-0.434061	0	0.155	1	14	Ric3
B230354K17Rik	0.000278618	-0.43435	0	0.155	1	14	B230354K17Rik
Fam216a	0.000279106	-0.585575	0.048	0.286	1	14	Fam216a
Pptc7	0.000279748	-0.531682	0.024	0.23	1	14	Pptc7
Hira	0.000280562	-0.499291	0	0.155	1	14	Hira
Wls	0.000282021	0.658842	0.476	0.384	1	14	Wls
Bri3	0.00028227	-0.259604	0.095	0.311	1	14	Bri3
Ythdc1	0.000282515	-0.687854	0.024	0.244	1	14	Ythdc1
Elmod1	0.000282519	-0.432758	0	0.155	1	14	Elmod1
Fzr1	0.000282519	-0.439729	0	0.155	1	14	Fzr1
Tomm6	0.000282975	-0.288124	0.119	0.364	1	14	Tomm6
Unc45a	0.000286475	-0.388501	0	0.155	1	14	Unc45a
X1500004A13Rik	0.000287572	-0.605466	0.024	0.244	1	14	X1500004A13Rik
Pxylp1	0.000288473	-0.428477	0	0.154	1	14	Pxylp1
Tbca	0.000289132	-0.460044	0.119	0.372	1	14	Tbca
Btbd3	0.000289984	-0.56619	0.024	0.242	1	14	Btbd3
Bbs1	0.000290484	-0.438048	0	0.154	1	14	Bbs1
Anapc4	0.000290858	0.453387	0.048	0.149	1	14	Anapc4
Phf23	0.000291145	0.323337	0.071	0.148	1	14	Phf23
Atp5g3	0.000292429	-0.907607	0.19	0.484	1	14	Atp5g3
Fam102a	0.00029251	-0.594403	0	0.154	1	14	Fam102a
Atp11a	0.000294549	-0.464525	0	0.154	1	14	Atp11a
Myt1l	0.000295656	-0.621044	0.024	0.245	1	14	Myt1l
Med28	0.0002973	-0.349121	0.095	0.324	1	14	Med28
Ryr2	0.00029867	-0.40052	0	0.154	1	14	Ryr2
Gap43	0.00029867	-0.951108	0	0.154	1	14	Gap43
Actr10	0.000299551	-0.266537	0.119	0.339	1	14	Actr10
Rasa4	0.000300752	-0.476881	0	0.154	1	14	Rasa4
Ly6e	0.000303405	-1.09355	0.024	0.245	1	14	Ly6e
Sned1	0.00030351	0.738353	0.167	0.036	1	14	Sned1
Spast	0.000304958	-0.504402	0	0.153	1	14	Spast
Ralgps1	0.000304958	-0.424734	0	0.153	1	14	Ralgps1
Sh3glb2	0.000306983	-0.618805	0.048	0.29	1	14	Sh3glb2
Parvb	0.000307082	-0.539691	0	0.153	1	14	Parvb
Slc1a2	0.000307082	-1.18085	0	0.153	1	14	Slc1a2
Lrtm2	0.000309222	-0.445609	0	0.153	1	14	Lrtm2
Amer2	0.000309222	-0.381168	0	0.153	1	14	Amer2
P4htm	0.000309222	-0.382589	0	0.153	1	14	P4htm
Gabarapl2	0.00030996	-0.268735	0.238	0.484	1	14	Gabarapl2
Vti1b	0.000311589	0.502727	0.095	0.147	1	14	Vti1b
Hdac11	0.000312126	-0.478927	0.048	0.268	1	14	Hdac11
Clta	0.000313403	-0.347428	0.214	0.491	1	14	Clta
Spint2	0.000313544	-0.398644	0	0.153	1	14	Spint2
Msl1	0.000314808	-0.365832	0.167	0.43	1	14	Msl1
Abhd8	0.000317011	-0.436641	0.048	0.27	1	14	Abhd8
Mmp17	0.000317926	-0.43215	0	0.153	1	14	Mmp17
Cdk17	0.000318227	-0.663047	0.024	0.244	1	14	Cdk17
Park7	0.000318379	-0.266426	0.119	0.343	1	14	Park7
Matr3	0.000319649	-0.606032	0.095	0.359	1	14	Matr3
Rps17	0.000319914	0.353269	0.595	0.662	1	14	Rps17
Ppp3ca	0.000321161	-0.369538	0.167	0.431	1	14	Ppp3ca
Tmem199	0.000322368	-0.43726	0	0.152	1	14	Tmem199
Rbm8a	0.000323333	0.355279	0.167	0.275	1	14	Rbm8a
Ankib1	0.000326871	-0.474737	0	0.152	1	14	Ankib1
Kif2a	0.000328427	-0.506383	0.024	0.233	1	14	Kif2a
Bhlhe41	0.000329228	0.749333	0.238	0.187	1	14	Bhlhe41
Atrx	0.000330693	-0.466945	0.048	0.266	1	14	Atrx
Atmin	0.000331436	-0.40985	0	0.152	1	14	Atmin
Ankmy2	0.000331436	-0.41655	0	0.152	1	14	Ankmy2
Paf1	0.000331436	-0.419043	0	0.152	1	14	Paf1
Vezt	0.000331436	-0.437749	0	0.152	1	14	Vezt
Slc25a12	0.000333433	-0.523808	0.024	0.237	1	14	Slc25a12
Pkp4	0.000333742	-0.564224	0	0.152	1	14	Pkp4
Ppt1	0.000336375	0.314555	0.214	0.316	1	14	Ppt1
Trim32	0.000337227	-0.659934	0.095	0.364	1	14	Trim32
Rab4a	0.000338402	-0.393359	0	0.151	1	14	Rab4a
Cwc15	0.000340852	-0.573852	0.048	0.281	1	14	Cwc15
Rdh14	0.000342216	0.262757	0.095	0.195	1	14	Rdh14
Fbxo21	0.000345634	-0.650177	0.071	0.327	1	14	Fbxo21
Top2b	0.000347478	0.352307	0.19	0.309	1	14	Top2b
Cdh8	0.000347913	-0.42957	0	0.151	1	14	Cdh8
Fam45a	0.000347913	-0.418059	0	0.151	1	14	Fam45a
Casc3	0.000352421	-0.318538	0.024	0.2	1	14	Casc3
Ube2d2a	0.00035266	-0.778115	0.143	0.426	1	14	Ube2d2a
Psmb1	0.000352745	-0.285494	0.143	0.38	1	14	Psmb1
St8sia3	0.000353011	-0.530795	0.024	0.239	1	14	St8sia3
Ddx1	0.000355219	-0.422921	0	0.15	1	14	Ddx1
Psmd3	0.000355366	-0.630909	0.071	0.322	1	14	Psmd3
Cct3	0.000356744	-0.29883	0.143	0.389	1	14	Cct3
Slc9a6	0.000358273	-0.280163	0.048	0.244	1	14	Slc9a6
Fam19a1	0.000360173	-0.420611	0	0.15	1	14	Fam19a1
Xpo6	0.000360173	-0.408895	0	0.15	1	14	Xpo6
Rims3	0.000360173	-0.361291	0	0.15	1	14	Rims3
Ccny	0.000360173	-0.45454	0	0.15	1	14	Ccny
Cebpd	0.000361028	0.593708	0.19	0.033	1	14	Cebpd
Psmd1	0.000361632	-0.41601	0.095	0.335	1	14	Psmd1
Sike1	0.000362676	-0.446638	0	0.15	1	14	Sike1
Ppm1l	0.000362676	-0.479729	0	0.15	1	14	Ppm1l
Uba3	0.000364749	-0.468098	0.048	0.264	1	14	Uba3
Atf7ip	0.000364945	-0.484327	0.024	0.219	1	14	Atf7ip
Fopnl	0.000365195	-0.406851	0	0.15	1	14	Fopnl
Hip1r	0.000365195	-0.546816	0	0.15	1	14	Hip1r
Garnl3	0.000366028	-0.285217	0.048	0.248	1	14	Garnl3
X4933434E20Rik	0.000366531	0.510814	0.19	0.249	1	14	X4933434E20Rik
Gdi2	0.000367302	-0.315322	0.238	0.519	1	14	Gdi2
Ncoa1	0.000367762	-0.608713	0.024	0.24	1	14	Ncoa1
Dcp2	0.000370211	-0.44807	0.024	0.226	1	14	Dcp2
X1700019D03Rik	0.000370286	-0.471974	0	0.15	1	14	X1700019D03Rik
Pgam5	0.000370286	-0.408077	0	0.15	1	14	Pgam5
Parp1	0.000370286	-0.493058	0	0.15	1	14	Parp1
Dcun1d1	0.000371526	0.515772	0.119	0.179	1	14	Dcun1d1
Smyd2	0.000372858	-0.411948	0	0.15	1	14	Smyd2
Nabp2	0.000372858	-0.426162	0	0.15	1	14	Nabp2
Lancl2	0.000375128	-0.298539	0.024	0.196	1	14	Lancl2
Haus2	0.000376238	0.34389	0.071	0.129	1	14	Haus2
Hsph1	0.000377726	-0.50811	0.119	0.38	1	14	Hsph1
Nr3c1	0.000378318	1.12	0.333	0.144	1	14	Nr3c1
X2010107E04Rik	0.000378922	-0.522165	0.143	0.417	1	14	X2010107E04Rik
Pdgfa	0.000380678	-0.622403	0	0.149	1	14	Pdgfa
Spryd7	0.000381894	-0.359351	0.024	0.208	1	14	Spryd7
X2210016L21Rik	0.000382149	-0.298309	0.071	0.277	1	14	X2210016L21Rik
Snrpc	0.000384612	0.29306	0.167	0.245	1	14	Snrpc
Tmco1	0.000384862	-0.383278	0.071	0.289	1	14	Tmco1
Usp5	0.000386564	-0.422396	0.071	0.297	1	14	Usp5
Cyr61	0.000390725	1.63661	0.167	0.029	1	14	Cyr61
Ndufa3	0.000391006	0.267135	0.19	0.27	1	14	Ndufa3
Pitpnm3	0.000391357	-0.380962	0	0.149	1	14	Pitpnm3
X6330403A02Rik	0.000391357	-0.843915	0	0.149	1	14	X6330403A02Rik
Ube2a	0.000392239	0.275577	0.095	0.171	1	14	Ube2a
Dnajc27	0.000392968	-0.560084	0.024	0.238	1	14	Dnajc27
Rpa1	0.000393876	-0.539722	0.024	0.237	1	14	Rpa1
Pnpo	0.000394073	-0.358673	0	0.148	1	14	Pnpo
Eif3e	0.000396246	-0.641413	0.048	0.285	1	14	Eif3e
Pik3r4	0.000396772	0.391364	0.071	0.124	1	14	Pik3r4
Tspan2	0.000399559	-1.26833	0	0.148	1	14	Tspan2
Commd4	0.000399559	-0.423561	0	0.148	1	14	Commd4
Tmem9b	0.000400131	-0.325804	0.119	0.347	1	14	Tmem9b
Anxa7	0.000400398	0.660679	0.262	0.168	1	14	Anxa7
Ankfy1	0.000402331	-0.448843	0	0.148	1	14	Ankfy1
Pdxk	0.000403084	0.267486	0.31	0.401	1	14	Pdxk
Abcg4	0.000405121	-0.369806	0	0.148	1	14	Abcg4
Ash2l	0.000405786	-0.588831	0.048	0.279	1	14	Ash2l
Anapc2	0.000406889	-0.42442	0.024	0.216	1	14	Anapc2
Pnisr	0.000406922	-0.649306	0.071	0.32	1	14	Pnisr
Ralgps2	0.000413607	-0.464318	0	0.148	1	14	Ralgps2
Fbxw7	0.000413607	-0.394985	0	0.148	1	14	Fbxw7
Caprin1	0.000414028	-0.465547	0.143	0.409	1	14	Caprin1
Nol3	0.000415392	-0.316176	0.024	0.196	1	14	Nol3
Phf5a	0.000419346	-0.410207	0.024	0.204	1	14	Phf5a
Zc3h15	0.000423379	-0.554796	0.024	0.236	1	14	Zc3h15
Cds1	0.000425193	-0.454212	0	0.147	1	14	Cds1
Mfsd7c	0.000426403	0.849533	0.119	0.012	1	14	Mfsd7c
Gabarapl1	0.000426554	-0.487755	0.31	0.605	1	14	Gabarapl1
Lsg1	0.00042814	-0.411251	0	0.147	1	14	Lsg1
Cntfr	0.00042814	-0.452293	0	0.147	1	14	Cntfr
Lsm3	0.000434092	-0.408335	0	0.147	1	14	Lsm3
Srrt	0.000436896	-0.619971	0.024	0.236	1	14	Srrt
Dalrd3	0.000437099	-0.397841	0	0.146	1	14	Dalrd3
Rpl4	0.000441868	0.267306	0.571	0.724	1	14	Rpl4
Tubb5	0.000444483	-0.326066	0.214	0.478	1	14	Tubb5
Hnrnpk	0.000445501	-0.319128	0.429	0.711	1	14	Hnrnpk
Gdap1l1	0.000446244	-0.37238	0	0.146	1	14	Gdap1l1
Stk32c	0.000446244	-0.40128	0	0.146	1	14	Stk32c
B930095G15Rik	0.000446244	-0.37209	0	0.146	1	14	B930095G15Rik
Dctn6	0.000449413	-0.503716	0.048	0.266	1	14	Dctn6
Mtus2	0.000452444	-0.387512	0	0.146	1	14	Mtus2
Myh10	0.000453795	-0.451916	0.048	0.268	1	14	Myh10
Braf	0.000454427	-0.29735	0.048	0.239	1	14	Braf
D930015E06Rik	0.000455576	-0.386552	0	0.146	1	14	D930015E06Rik
Kcnip3	0.000455576	-0.834761	0	0.146	1	14	Kcnip3
Tspyl2	0.000455689	-0.501031	0.024	0.224	1	14	Tspyl2
Rab3il1	0.000456987	0.914753	0.119	0.024	1	14	Rab3il1
Fstl5	0.000458729	-0.41453	0	0.145	1	14	Fstl5
Cadm3	0.000459553	-0.566488	0.048	0.277	1	14	Cadm3
Zc2hc1a	0.000464437	-0.368818	0.024	0.207	1	14	Zc2hc1a
Fam169a	0.0004651	-0.34998	0	0.145	1	14	Fam169a
X5730455P16Rik	0.000468183	-0.572069	0.024	0.236	1	14	X5730455P16Rik
D8Ertd738e	0.000470138	0.427991	0.19	0.263	1	14	D8Ertd738e
X4833439L19Rik	0.000471227	-0.542293	0.024	0.23	1	14	X4833439L19Rik
Slc1a1	0.000471559	-0.675183	0	0.145	1	14	Slc1a1
Kcng4	0.00047163	-0.842544	0.024	0.236	1	14	Kcng4
AU040320	0.000471982	-0.322223	0.024	0.196	1	14	AU040320
Psmd8	0.000473841	0.445645	0.238	0.329	1	14	Psmd8
Synpr	0.000475825	-1.45047	0.024	0.236	1	14	Synpr
C2cd2l	0.000478902	-0.339519	0.071	0.285	1	14	C2cd2l
Kpna3	0.000481412	-0.416832	0	0.145	1	14	Kpna3
Canx	0.000482051	-0.377446	0.31	0.59	1	14	Canx
Cmpk1	0.000484423	-0.322406	0.071	0.287	1	14	Cmpk1
Gnptab	0.000484741	-0.474153	0	0.144	1	14	Gnptab
X2700094K13Rik	0.000485026	-0.308966	0.024	0.194	1	14	X2700094K13Rik
Abcd2	0.000485712	0.255992	0.095	0.167	1	14	Abcd2
Grm5	0.000491467	-0.594961	0	0.144	1	14	Grm5
Hpgds	0.000491855	-0.743526	0.119	0.389	1	14	Hpgds
Otub1	0.000493112	-0.469092	0.024	0.228	1	14	Otub1
Emc10	0.000493866	-0.51909	0.143	0.415	1	14	Emc10
Adar	0.000494226	-0.326222	0.024	0.196	1	14	Adar
Trak1	0.000494865	-0.444266	0	0.144	1	14	Trak1
Mpp1	0.000495526	-0.453917	0.024	0.213	1	14	Mpp1
Ept1	0.000498285	-0.410203	0	0.144	1	14	Ept1
Adam23	0.000501729	-0.399045	0	0.144	1	14	Adam23
Lta4h	0.000504829	0.566661	0.214	0.102	1	14	Lta4h
Phactr1	0.000505197	-0.434802	0	0.144	1	14	Phactr1
Pfdn1	0.000506866	-0.499647	0.024	0.231	1	14	Pfdn1
Tsc22d3	0.00050755	0.728894	0.238	0.151	1	14	Tsc22d3
Cnot3	0.000508611	-0.520604	0.024	0.23	1	14	Cnot3
Prmt2	0.000512094	-0.505779	0.024	0.226	1	14	Prmt2
Nifk	0.000512147	0.375206	0.048	0.111	1	14	Nifk
Mrpl33	0.000512202	-0.407098	0	0.143	1	14	Mrpl33
Slain1	0.000512202	-0.635345	0	0.143	1	14	Slain1
Tspan12	0.000515741	-0.440046	0	0.143	1	14	Tspan12
Cdh3	0.000515741	-0.466584	0	0.143	1	14	Cdh3
Slit2	0.000518255	-0.5929	0.024	0.234	1	14	Slit2
Kcnk3	0.000519304	-0.402963	0	0.143	1	14	Kcnk3
B3gat3	0.000519304	-0.374469	0	0.143	1	14	B3gat3
Yeats2	0.000519304	-0.410434	0	0.143	1	14	Yeats2
Smarca5	0.000521782	-0.340294	0.071	0.28	1	14	Smarca5
Zbtb4	0.000523004	0.566037	0.333	0.253	1	14	Zbtb4
Nap1l4	0.000523985	-0.58291	0.024	0.233	1	14	Nap1l4
Klhl7	0.000529898	-0.676677	0.071	0.319	1	14	Klhl7
Msi1	0.000530138	-0.396064	0	0.143	1	14	Msi1
Wapl	0.000533798	-0.486178	0	0.143	1	14	Wapl
Senp2	0.000537484	-0.446042	0	0.142	1	14	Senp2
Sp3	0.000539941	0.642976	0.214	0.15	1	14	Sp3
Ss18l1	0.000541194	-0.392595	0	0.142	1	14	Ss18l1
X1110008P14Rik	0.000541194	-0.366372	0	0.142	1	14	X1110008P14Rik
Sorcs2	0.00054493	-0.403708	0	0.142	1	14	Sorcs2
Plxnc1	0.000547145	-0.558311	0.095	0.346	1	14	Plxnc1
Eif3h	0.000552303	-0.527846	0.214	0.495	1	14	Eif3h
Ciapin1	0.000554458	-0.568046	0.048	0.272	1	14	Ciapin1
Cdh10	0.00055629	-0.445155	0	0.142	1	14	Cdh10
Dip2b	0.000559035	-0.281979	0.048	0.224	1	14	Dip2b
Rngtt	0.000560034	0.504201	0.048	0.11	1	14	Rngtt
Mtor	0.000563543	-0.454241	0.024	0.218	1	14	Mtor
Rnf38	0.000563992	-0.411881	0	0.141	1	14	Rnf38
Ncoa2	0.000566967	-0.540754	0.024	0.23	1	14	Ncoa2
Tsen15	0.000567883	-0.424603	0	0.141	1	14	Tsen15
Higd1a	0.000568109	-0.275072	0.095	0.302	1	14	Higd1a
Rpl12	0.000570519	0.352588	0.476	0.532	1	14	Rpl12
Mapk4	0.0005718	-0.397748	0	0.141	1	14	Mapk4
Ylpm1	0.0005718	-0.402104	0	0.141	1	14	Ylpm1
Slbp	0.000575513	0.310541	0.048	0.15	1	14	Slbp
Mrps12	0.000576513	-0.26013	0.048	0.23	1	14	Mrps12
Cartpt	0.000579713	-0.601806	0	0.141	1	14	Cartpt
Pknox2	0.000580062	0.274486	0.071	0.157	1	14	Pknox2
Ndufb3	0.000582384	-0.559179	0.024	0.23	1	14	Ndufb3
Ypel2	0.000583711	-0.494992	0	0.141	1	14	Ypel2
Coq7	0.000585661	-0.351797	0.024	0.197	1	14	Coq7
Uso1	0.000586491	-0.541566	0.048	0.272	1	14	Uso1
Ranbp3	0.000587735	-0.387847	0	0.141	1	14	Ranbp3
Bod1	0.000587735	-0.415588	0	0.141	1	14	Bod1
Mtm1	0.000587978	-0.580367	0.048	0.274	1	14	Mtm1
Hnrnpa1	0.000588805	-0.618993	0.286	0.58	1	14	Hnrnpa1
Vps29	0.000589647	-0.586585	0.048	0.273	1	14	Vps29
Cntn2	0.000591787	-0.623404	0	0.141	1	14	Cntn2
Bbs4	0.000595866	-0.363475	0	0.14	1	14	Bbs4
Ppig	0.00060322	-0.439226	0.048	0.254	1	14	Ppig
Atrn	0.000608126	-0.64658	0.048	0.275	1	14	Atrn
Lman2l	0.00060827	-0.370006	0	0.14	1	14	Lman2l
Ndufc1	0.000613459	-0.538546	0.095	0.34	1	14	Ndufc1
Bcas2	0.000614965	-0.504806	0.262	0.549	1	14	Bcas2
Slc25a1	0.000615481	-0.615516	0.024	0.23	1	14	Slc25a1
Pias1	0.000617243	0.297992	0.048	0.152	1	14	Pias1
Kcnj9	0.000625206	-0.366019	0	0.139	1	14	Kcnj9
Abcb4	0.000625206	-0.453015	0	0.139	1	14	Abcb4
Opa1	0.000629462	-0.544791	0.048	0.274	1	14	Opa1
Cox8a	0.000630792	-0.626979	0.429	0.694	1	14	Cox8a
Cytip	0.000633847	-0.505051	0	0.139	1	14	Cytip
Ndufa9	0.000633847	-0.39066	0	0.139	1	14	Ndufa9
Syt15	0.000633847	-0.570554	0	0.139	1	14	Syt15
Mrpl49	0.000633847	-0.396716	0	0.139	1	14	Mrpl49
B4galt6	0.000634166	-0.584587	0.095	0.349	1	14	B4galt6
Lrfn5	0.000638211	-0.39322	0	0.139	1	14	Lrfn5
Plppr3	0.000638211	-0.371536	0	0.139	1	14	Plppr3
Col4a3bp	0.000638211	-0.45694	0	0.139	1	14	Col4a3bp
Rhoj	0.000638512	0.731016	0.143	0.049	1	14	Rhoj
Pmp22	0.000646741	0.709165	0.286	0.083	1	14	Pmp22
Adipor1	0.000647039	-0.503777	0.071	0.302	1	14	Adipor1
Cdk2ap2	0.000647073	0.738065	0.19	0.126	1	14	Cdk2ap2
Bnip3	0.000647689	-0.431677	0.048	0.255	1	14	Bnip3
Zdhhc9	0.000651483	-0.500106	0	0.139	1	14	Zdhhc9
Tacr1	0.000651483	-0.365685	0	0.139	1	14	Tacr1
D1Ertd622e	0.000651483	-0.428174	0	0.139	1	14	D1Ertd622e
Oxr1	0.000654566	-0.418722	0.071	0.288	1	14	Oxr1
Ppp1r21	0.000657787	-0.417333	0.024	0.206	1	14	Ppp1r21
Ahsa1	0.000658798	-0.462296	0.048	0.256	1	14	Ahsa1
Aplp2	0.00065897	0.321445	0.476	0.555	1	14	Aplp2
Ormdl1	0.000660481	-0.399461	0	0.138	1	14	Ormdl1
B4galnt4	0.000660481	-0.357035	0	0.138	1	14	B4galnt4
Cck	0.000660481	-1.02788	0	0.138	1	14	Cck
Fgf13	0.000665026	-0.393687	0	0.138	1	14	Fgf13
Opa3	0.000665026	-0.407069	0	0.138	1	14	Opa3
Rps7	0.00066749	-0.34031	0.381	0.654	1	14	Rps7
Ppp1r37	0.000668156	-0.569123	0.024	0.226	1	14	Ppp1r37
Mrpl53	0.000668618	-0.318222	0.119	0.338	1	14	Mrpl53
Ppfia2	0.000674209	-0.376208	0	0.138	1	14	Ppfia2
Gfra4	0.000674209	-0.332724	0	0.138	1	14	Gfra4
Cd59a	0.000674209	-0.536464	0	0.138	1	14	Cd59a
[truncated: 25,865 more rows]
