# Supplementary material for: Anatomical and single-cell transcriptional profiling of the murine habenular complex
Source: eLife. 2020 Feb 11;9:e51271. doi: 10.7554/eLife.51271 (PMC7012610; doi:10.7554/eLife.51271)
Supplement: Supplementary file 3. [file elife-51271-supp3.xlsx]

## Sheet: Table_3_mhb_DEGs_MAST
	p_val	avg_logFC	pct.1	pct.2	p_val_adj	cluster	gene
Synpr	0	2.74538	0.875	0.092	0	6	Synpr
Nrgn	0	1.57487	0.933	0.291	0	6	Nrgn
Prkcb	0	1.54482	0.861	0.298	0	6	Prkcb
Cpne9	0	1.47519	0.852	0.27	0	6	Cpne9
Cplx1	0	1.17304	0.935	0.613	0	6	Cplx1
Calb2	0	-2.62326	0.134	0.888	0	6	Calb2
Necab3	5.70686e-278	1.15267	0.858	0.372	1.44321e-273	6	Necab3
Plch2	8.40553e-276	1.17025	0.858	0.303	2.12567e-271	6	Plch2
Rapgef4	3.62774e-275	1.37562	0.71	0.152	9.1742e-271	6	Rapgef4
Chrnb3	1.23622e-272	1.23508	0.631	0.072	3.12627e-268	6	Chrnb3
Pde2a	2.54595e-253	0.87313	0.943	0.713	6.43845e-249	6	Pde2a
Gdpd5	1.6655e-252	1.09498	0.744	0.176	4.21189e-248	6	Gdpd5
Sema5a	4.91806e-251	1.14022	0.622	0.086	1.24373e-246	6	Sema5a
Slc24a2	2.72797e-248	1.27302	0.652	0.114	6.89876e-244	6	Slc24a2
Tac1	2.6979e-221	-1.62863	0.042	0.518	6.82272e-217	6	Tac1
Cbln4	5.61999e-220	1.11951	0.709	0.186	1.42124e-215	6	Cbln4
Calb1	3.47292e-217	-1.60226	0.024	0.474	8.78266e-213	6	Calb1
Rprm	4.27593e-214	-1.33282	0.04	0.507	1.08134e-209	6	Rprm
Slc5a7	5.01355e-211	1.11511	0.711	0.213	1.26788e-206	6	Slc5a7
Syne1	3.99676e-203	0.953028	0.87	0.536	1.01074e-198	6	Syne1
Pdzd8	1.4642e-202	1.14287	0.643	0.154	3.70283e-198	6	Pdzd8
Kcnip1	7.27646e-200	0.879956	0.874	0.608	1.84014e-195	6	Kcnip1
X6330403K07Rik	1.1416e-198	-1.05032	0.439	0.805	2.887e-194	6	X6330403K07Rik
Map1b	6.79756e-190	0.696486	0.971	0.916	1.71903e-185	6	Map1b
Rbfox3	6.79914e-190	1.04549	0.763	0.316	1.71943e-185	6	Rbfox3
Sphkap	1.30214e-188	1.105	0.747	0.292	3.29299e-184	6	Sphkap
Cck	5.90866e-186	-1.84283	0.037	0.44	1.49424e-181	6	Cck
Kcng4	3.50375e-177	-1.18654	0.222	0.669	8.86063e-173	6	Kcng4
Marcksl1	4.82022e-176	-1.19405	0.133	0.571	1.21899e-171	6	Marcksl1
Lmo3	4.96025e-175	0.912972	0.421	0.035	1.2544e-170	6	Lmo3
Wif1	3.491e-173	-1.30375	0.009	0.379	8.82838e-169	6	Wif1
Baiap3	2.25103e-169	-1.08978	0.066	0.484	5.69262e-165	6	Baiap3
Prkar2a	2.29262e-168	0.779563	0.896	0.619	5.79782e-164	6	Prkar2a
Kcnma1	3.06813e-166	0.675647	0.937	0.796	7.759e-162	6	Kcnma1
Rap1gap	4.16419e-163	0.688016	0.906	0.699	1.05308e-158	6	Rap1gap
Gm13889	3.24204e-162	0.840396	0.616	0.158	8.19881e-158	6	Gm13889
Pou3f1	1.07081e-159	0.851708	0.609	0.161	2.70798e-155	6	Pou3f1
Impdh1	2.24264e-159	0.842448	0.706	0.268	5.67142e-155	6	Impdh1
Syndig1l	1.27656e-157	0.785968	0.37	0.025	3.22829e-153	6	Syndig1l
X6330403A02Rik	8.73499e-148	-1.52016	0.062	0.399	2.20899e-143	6	X6330403A02Rik
Kcna2	1.97347e-147	0.802198	0.789	0.417	4.99072e-143	6	Kcna2
Ahi1	2.14893e-147	-1.00318	0.373	0.674	5.43442e-143	6	Ahi1
Frrs1l	6.31038e-142	0.950964	0.703	0.316	1.59583e-137	6	Frrs1l
Kitl	1.72771e-140	0.814179	0.668	0.233	4.3692e-136	6	Kitl
Igfbp7	3.84917e-139	0.665214	0.301	0.012	9.73415e-135	6	Igfbp7
Basp1	3.06339e-135	-0.872745	0.438	0.782	7.74699e-131	6	Basp1
Celf6	2.91088e-134	-0.966682	0.23	0.602	7.36131e-130	6	Celf6
Resp18	1.66957e-133	-0.98876	0.349	0.657	4.22218e-129	6	Resp18
Chst2	4.97481e-133	0.685811	0.874	0.632	1.25808e-128	6	Chst2
Ncald	8.8535e-130	0.729774	0.874	0.706	2.23896e-125	6	Ncald
Tmem130	4.46018e-129	-0.625732	0.819	0.896	1.12793e-124	6	Tmem130
Slc18a3	1.01742e-127	0.6675	0.432	0.076	2.57296e-123	6	Slc18a3
Tpbgl	1.29494e-126	0.589096	0.326	0.027	3.27477e-122	6	Tpbgl
Nnat	1.43511e-126	-0.915503	0.5	0.788	3.62925e-122	6	Nnat
Scn8a	2.23279e-124	0.741763	0.632	0.237	5.64649e-120	6	Scn8a
X6030419C18Rik	5.987e-124	0.806153	0.587	0.192	1.51405e-119	6	X6030419C18Rik
Gng8	6.60284e-124	-0.773823	0.488	0.795	1.66979e-119	6	Gng8
Ebf1	1.00336e-123	0.792567	0.564	0.167	2.53739e-119	6	Ebf1
Cox14	6.60677e-122	0.734379	0.814	0.559	1.67079e-117	6	Cox14
Pnmal2	2.09593e-119	-0.612472	0.769	0.863	5.30039e-115	6	Pnmal2
Tcf4	2.50112e-116	0.844146	0.506	0.15	6.32508e-112	6	Tcf4
Tagln2	1.27525e-113	-0.779994	0.02	0.297	3.22498e-109	6	Tagln2
Ngb	1.87144e-113	-0.772671	0.04	0.341	4.73267e-109	6	Ngb
Pld5	1.1848e-110	0.658446	0.647	0.257	2.99625e-106	6	Pld5
Thy1	1.67142e-109	0.484996	0.944	0.854	4.22684e-105	6	Thy1
Gabbr2	2.1141e-106	0.552221	0.892	0.625	5.34634e-102	6	Gabbr2
Clec18a	4.25496e-105	0.502503	0.339	0.049	1.07604e-100	6	Clec18a
Jund	6.10565e-105	-0.706255	0.558	0.749	1.54406e-100	6	Jund
Col16a1	5.32348e-104	-0.697515	0.019	0.285	1.34625e-99	6	Col16a1
St3gal5	2.48426e-103	0.699808	0.622	0.248	6.28245e-99	6	St3gal5
Fgf1	1.79534e-102	0.803911	0.484	0.138	4.54025e-98	6	Fgf1
X3632451O06Rik	5.18313e-102	0.697484	0.706	0.362	1.31076e-97	6	X3632451O06Rik
Cytip	9.16493e-102	-0.884194	0.082	0.388	2.31772e-97	6	Cytip
Napb	9.24477e-101	0.605447	0.86	0.658	2.33791e-96	6	Napb
Zcchc12	1.54474e-100	-0.640457	0.664	0.825	3.90649e-96	6	Zcchc12
Gas5	2.60097e-100	-0.712249	0.604	0.757	6.57758e-96	6	Gas5
Nrsn2	1.36565e-98	-0.661115	0.551	0.786	3.4536e-94	6	Nrsn2
Nfib	3.75078e-98	0.580624	0.487	0.146	9.48534e-94	6	Nfib
Zdhhc18	8.43374e-96	0.636404	0.683	0.331	2.13281e-91	6	Zdhhc18
Zfand5	2.3682e-95	0.590569	0.869	0.643	5.98895e-91	6	Zfand5
Adam11	7.90009e-95	0.623385	0.732	0.399	1.99785e-90	6	Adam11
Etv1	2.30553e-92	0.504161	0.726	0.364	5.83046e-88	6	Etv1
Rps3a1	5.20681e-92	-0.606343	0.725	0.839	1.31675e-87	6	Rps3a1
Rpl3	3.21177e-91	-0.579732	0.725	0.819	8.12224e-87	6	Rpl3
X1700019D03Rik	6.13297e-89	0.557363	0.382	0.089	1.55097e-84	6	X1700019D03Rik
Ank1	5.03239e-88	0.55427	0.403	0.103	1.27264e-83	6	Ank1
Mapt	5.14852e-88	-0.649674	0.536	0.711	1.30201e-83	6	Mapt
Ntm	9.57279e-88	0.565941	0.432	0.122	2.42086e-83	6	Ntm
Pcsk1n	1.06826e-87	-0.52639	0.805	0.874	2.70154e-83	6	Pcsk1n
Efnb3	1.45172e-87	-0.719186	0.229	0.546	3.67125e-83	6	Efnb3
2019-09-06	2.93877e-86	0.57271	0.621	0.278	7.43186e-82	6	2019-09-06
Igsf21	6.17743e-86	0.429829	0.223	0.016	1.56221e-81	6	Igsf21
Cbln1	2.54425e-85	-0.697261	0.096	0.382	6.43415e-81	6	Cbln1
Tnks	1.71988e-84	0.613165	0.67	0.34	4.34939e-80	6	Tnks
Nrn1	5.06646e-84	0.407724	0.935	0.875	1.28126e-79	6	Nrn1
Syt9	5.17547e-84	0.413427	0.93	0.844	1.30882e-79	6	Syt9
Gpr139	5.7716e-84	-0.727415	0.144	0.437	1.45958e-79	6	Gpr139
Tmem56	8.60493e-84	0.606442	0.784	0.525	2.1761e-79	6	Tmem56
Nfam1	1.09673e-83	0.579611	0.325	0.063	2.77352e-79	6	Nfam1
Rasgrp1	2.8506e-83	0.6061	0.5	0.181	7.20889e-79	6	Rasgrp1
Pou3f3	8.22108e-83	0.58707	0.393	0.103	2.07903e-78	6	Pou3f3
Cpne4	1.32154e-82	0.52874	0.782	0.471	3.34204e-78	6	Cpne4
Ldha	6.23737e-82	-0.686714	0.387	0.643	1.57737e-77	6	Ldha
Fgf13	4.00785e-81	0.492311	0.366	0.089	1.01354e-76	6	Fgf13
Cpe	1.56253e-80	0.45405	0.925	0.833	3.95148e-76	6	Cpe
Cacng5	1.69342e-79	0.451584	0.311	0.06	4.28249e-75	6	Cacng5
Tesc	2.26409e-79	0.542997	0.677	0.345	5.72567e-75	6	Tesc
Rps8	6.64403e-79	-0.483492	0.796	0.86	1.68021e-74	6	Rps8
Maoa	8.87973e-79	-0.591704	0.553	0.714	2.24559e-74	6	Maoa
Lhfp	9.47131e-78	0.576567	0.346	0.083	2.3952e-73	6	Lhfp
Rps3	9.50192e-78	-0.485381	0.768	0.821	2.40294e-73	6	Rps3
Rps23	2.18617e-77	-0.519809	0.764	0.846	5.5286e-73	6	Rps23
Cnst	2.85734e-77	0.557914	0.503	0.193	7.22594e-73	6	Cnst
Gpr4	4.39966e-76	0.443734	0.333	0.077	1.11263e-71	6	Gpr4
Rps21	1.46908e-75	-0.483617	0.767	0.825	3.71515e-71	6	Rps21
Atp2b2	2.00709e-75	0.557935	0.513	0.204	5.07573e-71	6	Atp2b2
Pde11a	4.79793e-75	-0.883955	0.013	0.198	1.21335e-70	6	Pde11a
Ildr2	5.9106e-75	-0.656779	0.059	0.306	1.49473e-70	6	Ildr2
Chrna3	6.77314e-75	0.511302	0.74	0.423	1.71286e-70	6	Chrna3
Rps29	3.32276e-74	-0.479063	0.764	0.843	8.40294e-70	6	Rps29
Rgs6	1.18684e-73	0.490758	0.538	0.224	3.00139e-69	6	Rgs6
Kcnmb4	1.56922e-73	-0.872439	0.295	0.527	3.9684e-69	6	Kcnmb4
Adcyap1	3.55087e-73	-1.00866	0.156	0.349	8.9798e-69	6	Adcyap1
Gabra2	4.947e-73	-0.525667	0.656	0.721	1.25105e-68	6	Gabra2
Rps14	8.23265e-73	-0.551915	0.683	0.787	2.08196e-68	6	Rps14
Nrcam	2.51495e-72	0.480075	0.632	0.313	6.36005e-68	6	Nrcam
Rps6	8.011e-72	-0.519726	0.632	0.749	2.0259e-67	6	Rps6
Ndufa4	1.42238e-71	0.416559	0.915	0.802	3.59704e-67	6	Ndufa4
Cartpt	1.65005e-71	-0.702605	0.09	0.349	4.17282e-67	6	Cartpt
Rap1gap2	2.21312e-71	0.57963	0.589	0.277	5.59676e-67	6	Rap1gap2
Spon1	2.42717e-71	-0.627046	0.05	0.284	6.13806e-67	6	Spon1
Chat	8.0788e-71	0.448374	0.237	0.033	2.04305e-66	6	Chat
Gnb2	1.88741e-70	-0.671582	0.135	0.396	4.77306e-66	6	Gnb2
Fscn1	3.73414e-70	-0.596928	0.079	0.329	9.44326e-66	6	Fscn1
Rpl14	1.09975e-69	-0.50111	0.681	0.789	2.78115e-65	6	Rpl14
Gde1	4.28205e-69	0.490583	0.799	0.57	1.08289e-64	6	Gde1
Atp6v1g2	1.28239e-68	0.558542	0.746	0.49	3.24305e-64	6	Atp6v1g2
Coro2b	1.45375e-68	0.506339	0.749	0.514	3.67638e-64	6	Coro2b
Celf2	2.01961e-68	0.425776	0.889	0.732	5.1074e-64	6	Celf2
Calm3	2.85514e-68	0.368683	0.954	0.884	7.22037e-64	6	Calm3
Rpl23	3.0245e-68	-0.561376	0.74	0.818	7.64867e-64	6	Rpl23
Snca	4.12101e-68	0.502316	0.791	0.522	1.04216e-63	6	Snca
Lynx1	1.87132e-67	0.421769	0.218	0.028	4.73237e-63	6	Lynx1
Gpd1	2.10397e-67	0.432141	0.268	0.051	5.32072e-63	6	Gpd1
Gnb4	2.20142e-67	-0.55695	0.059	0.285	5.56718e-63	6	Gnb4
Rps9	3.56629e-67	-0.491898	0.683	0.767	9.0188e-63	6	Rps9
Dapk1	5.67217e-67	0.55834	0.467	0.184	1.43444e-62	6	Dapk1
Tnfaip2	1.00294e-66	0.424	0.231	0.034	2.53634e-62	6	Tnfaip2
Rgma	4.77528e-66	0.47852	0.556	0.257	1.20762e-61	6	Rgma
Slc2a13	8.87649e-66	-0.627922	0.452	0.614	2.24478e-61	6	Slc2a13
Pcp4l1	1.6948e-65	0.438325	0.337	0.098	4.28599e-61	6	Pcp4l1
Rpl17	3.64638e-64	-0.485376	0.677	0.776	9.22133e-60	6	Rpl17
Cd47	8.84848e-64	-0.694541	0.119	0.344	2.23769e-59	6	Cd47
Usp25	1.58911e-63	0.449638	0.292	0.069	4.0187e-59	6	Usp25
Wfdc1	3.92088e-63	-0.611311	0.035	0.23	9.91552e-59	6	Wfdc1
Rps19	5.07212e-63	-0.491372	0.675	0.775	1.28269e-58	6	Rps19
Tmem158	5.32831e-63	-0.706164	0.178	0.395	1.34748e-58	6	Tmem158
Adarb1	8.5048e-63	0.516948	0.433	0.167	2.15078e-58	6	Adarb1
Rpl35a	1.30668e-62	-0.505993	0.687	0.78	3.30446e-58	6	Rpl35a
Chst1	2.98738e-62	0.451274	0.803	0.545	7.5548e-58	6	Chst1
Esam	6.16618e-62	0.462758	0.268	0.057	1.55937e-57	6	Esam
Ctxn1	1.04102e-61	-0.544869	0.077	0.303	2.63263e-57	6	Ctxn1
Rpl37	1.22753e-61	-0.496716	0.628	0.745	3.10431e-57	6	Rpl37
A830010M20Rik	1.71803e-61	0.508841	0.551	0.262	4.34471e-57	6	A830010M20Rik
Rpl30	1.99372e-61	-0.498693	0.63	0.74	5.04192e-57	6	Rpl30
Nap1l5	6.0871e-61	-0.98701	0.169	0.376	1.53937e-56	6	Nap1l5
Fzd7	3.14023e-60	0.513933	0.333	0.098	7.94133e-56	6	Fzd7
Rpl13	4.63247e-60	-0.485421	0.593	0.717	1.17151e-55	6	Rpl13
Dclk1	9.84264e-60	0.412083	0.89	0.785	2.48911e-55	6	Dclk1
Zfp536	1.08829e-59	0.497955	0.305	0.081	2.75216e-55	6	Zfp536
Rcan2	1.32488e-59	0.425136	0.642	0.351	3.35048e-55	6	Rcan2
Lhx9	2.8899e-59	-0.584567	0.481	0.644	7.30827e-55	6	Lhx9
Pcdh9	5.11174e-59	-0.666783	0.32	0.547	1.29271e-54	6	Pcdh9
Gaa	5.37976e-59	-0.502982	0.57	0.69	1.36049e-54	6	Gaa
Cacnb4	1.00668e-58	0.524566	0.568	0.287	2.54578e-54	6	Cacnb4
Map3k6	1.3407e-58	0.462715	0.464	0.194	3.3905e-54	6	Map3k6
Rpl37a	1.4142e-58	-0.493629	0.638	0.729	3.57637e-54	6	Rpl37a
A730017C20Rik	2.51953e-58	-0.593579	0.23	0.48	6.37165e-54	6	A730017C20Rik
Cadm2	4.10289e-58	0.435459	0.73	0.449	1.03758e-53	6	Cadm2
Sema3d	8.44536e-58	-0.550036	0.011	0.164	2.13575e-53	6	Sema3d
Csdc2	1.14393e-57	0.380956	0.391	0.141	2.8929e-53	6	Csdc2
Nhlh2	1.27757e-57	-0.580297	0.424	0.621	3.23085e-53	6	Nhlh2
Tppp3	1.62233e-57	-0.65147	0.206	0.429	4.1027e-53	6	Tppp3
St6galnac5	2.70195e-57	0.397384	0.879	0.71	6.83296e-53	6	St6galnac5
Neurod2	6.78329e-57	0.281543	0.162	0.015	1.71543e-52	6	Neurod2
Strbp	1.27899e-56	0.455901	0.687	0.411	3.23443e-52	6	Strbp
Rps16	2.09886e-56	-0.498148	0.586	0.69	5.30781e-52	6	Rps16
Rps5	2.14501e-56	-0.484641	0.568	0.693	5.42452e-52	6	Rps5
Rpl21	2.50782e-56	-0.560827	0.53	0.65	6.34201e-52	6	Rpl21
Gnal	3.02082e-56	0.486261	0.656	0.389	7.63936e-52	6	Gnal
Fam101b	4.26957e-56	0.36891	0.229	0.044	1.07973e-51	6	Fam101b
Sostdc1	4.9459e-56	0.432149	0.432	0.174	1.25077e-51	6	Sostdc1
Snap25	5.5706e-56	0.367932	0.933	0.841	1.40875e-51	6	Snap25
Gas6	7.78696e-56	0.470308	0.478	0.212	1.96924e-51	6	Gas6
Nptn	8.69351e-56	0.506777	0.706	0.459	2.1985e-51	6	Nptn
Nr4a2	1.20661e-55	0.286695	0.908	0.701	3.0514e-51	6	Nr4a2
Ctnnb1	1.53744e-55	0.347285	0.918	0.842	3.88802e-51	6	Ctnnb1
Gnaz	1.79109e-55	-0.559075	0.244	0.466	4.52949e-51	6	Gnaz
Slc25a5	1.8821e-55	0.441778	0.651	0.371	4.75964e-51	6	Slc25a5
Kcnd2	2.56812e-55	0.463811	0.685	0.416	6.49452e-51	6	Kcnd2
Rps27a	4.66525e-55	-0.418331	0.805	0.865	1.1798e-50	6	Rps27a
Prkcq	5.30382e-55	0.541241	0.705	0.458	1.34128e-50	6	Prkcq
St3gal1	1.06853e-54	0.430265	0.3	0.085	2.70221e-50	6	St3gal1
Stmn4	1.72448e-54	-0.702284	0.094	0.308	4.36104e-50	6	Stmn4
Vav3	3.07217e-54	0.389176	0.809	0.565	7.76921e-50	6	Vav3
Srebf2	6.40039e-54	-0.57863	0.338	0.553	1.61859e-49	6	Srebf2
Syt15	1.10532e-53	-0.72007	0.14	0.359	2.79523e-49	6	Syt15
Slc12a5	1.46643e-53	-0.670586	0.146	0.324	3.70845e-49	6	Slc12a5
Lrrc3b	4.19627e-53	0.44816	0.577	0.308	1.0612e-48	6	Lrrc3b
Rasd2	5.92617e-53	-0.476	0.025	0.189	1.49867e-48	6	Rasd2
Tmem163	7.03142e-53	-0.613748	0.215	0.434	1.77818e-48	6	Tmem163
Myt1l	9.03205e-53	0.437324	0.569	0.298	2.28411e-48	6	Myt1l
Rpl24	1.21427e-52	-0.392567	0.694	0.763	3.07078e-48	6	Rpl24
Chrnb4	1.26179e-52	0.380512	0.778	0.523	3.19094e-48	6	Chrnb4
Pcbd1	2.18959e-52	-0.497719	0.08	0.284	5.53727e-48	6	Pcbd1
Got1	2.25404e-52	0.41478	0.859	0.721	5.70024e-48	6	Got1
Cbln2	6.77507e-52	-0.503794	0.549	0.656	1.71335e-47	6	Cbln2
Syt5	2.01963e-51	-0.484574	0.158	0.379	5.10743e-47	6	Syt5
Kcnip3	2.59131e-51	0.366749	0.23	0.05	6.55315e-47	6	Kcnip3
Hopx	1.54386e-50	-0.489606	0.577	0.723	3.90427e-46	6	Hopx
Luzp1	1.55092e-50	0.365663	0.317	0.103	3.92213e-46	6	Luzp1
Vat1	1.91579e-50	-0.547264	0.352	0.549	4.84484e-46	6	Vat1
Robo3	4.75804e-50	0.417798	0.49	0.234	1.20326e-45	6	Robo3
Syt13	5.97445e-50	-0.49374	0.661	0.744	1.51088e-45	6	Syt13
Cadm1	9.94825e-50	-0.487492	0.651	0.727	2.51581e-45	6	Cadm1
Rplp1	9.98012e-50	-0.477455	0.486	0.634	2.52387e-45	6	Rplp1
Atp1b2	1.53809e-49	0.478491	0.664	0.408	3.88967e-45	6	Atp1b2
Rpl34	1.63237e-49	-0.467742	0.553	0.662	4.1281e-45	6	Rpl34
Nefm	1.97972e-49	0.41615	0.569	0.305	5.00651e-45	6	Nefm
Setd7	6.24703e-49	0.417788	0.474	0.223	1.57981e-44	6	Setd7
Mgll	6.36012e-49	-0.558068	0.178	0.356	1.60841e-44	6	Mgll
Ahcyl1	1.26467e-48	0.437296	0.656	0.403	3.19821e-44	6	Ahcyl1
Grina	1.61692e-48	0.429702	0.772	0.589	4.08904e-44	6	Grina
Sh3bp4	1.98152e-48	0.417252	0.37	0.143	5.01106e-44	6	Sh3bp4
Scx	3.3859e-48	-0.380876	0.022	0.175	8.56261e-44	6	Scx
Kcnk1	6.73675e-48	0.297679	0.237	0.06	1.70366e-43	6	Kcnk1
Ptprz1	9.1333e-48	-0.55083	0.165	0.367	2.30972e-43	6	Ptprz1
Tex15	1.71527e-47	0.361437	0.265	0.076	4.33773e-43	6	Tex15
Tmsb10	2.03977e-47	-0.522732	0.233	0.442	5.15837e-43	6	Tmsb10
Fxyd6	2.21784e-47	-0.533783	0.026	0.178	5.60869e-43	6	Fxyd6
Snn	2.54194e-47	0.369079	0.333	0.12	6.42831e-43	6	Snn
Tmem35	4.17538e-47	0.453322	0.509	0.258	1.05591e-42	6	Tmem35
Laptm4b	5.53324e-47	0.318209	0.314	0.109	1.3993e-42	6	Laptm4b
Enah	7.02992e-47	-0.493424	0.393	0.569	1.7778e-42	6	Enah
Acsl6	7.69614e-47	0.394532	0.465	0.221	1.94628e-42	6	Acsl6
Avil	1.54695e-46	-0.394474	0.003	0.115	3.91207e-42	6	Avil
Enho	2.32227e-46	0.391776	0.516	0.266	5.8728e-42	6	Enho
Rspo4	2.6265e-46	-0.54133	0.104	0.306	6.64217e-42	6	Rspo4
Mgat5	2.64357e-46	0.421789	0.464	0.221	6.68532e-42	6	Mgat5
Neurod1	2.79034e-46	0.441217	0.554	0.301	7.05648e-42	6	Neurod1
Kif21a	3.09215e-46	0.419471	0.815	0.622	7.81973e-42	6	Kif21a
Hhip	3.88466e-46	0.411264	0.81	0.607	9.82391e-42	6	Hhip
Agpat3	4.87974e-46	0.375283	0.638	0.387	1.23404e-41	6	Agpat3
X1700020I14Rik	5.73817e-46	0.414447	0.42	0.187	1.45112e-41	6	X1700020I14Rik
Atp6v1e1	9.40427e-46	0.367821	0.847	0.682	2.37825e-41	6	Atp6v1e1
Mark4	1.60214e-45	0.406516	0.481	0.238	4.05166e-41	6	Mark4
Slc17a7	2.54765e-45	0.397486	0.655	0.409	6.44275e-41	6	Slc17a7
Rpl10	3.01719e-45	-0.46636	0.377	0.53	7.63017e-41	6	Rpl10
Plcxd2	3.14661e-45	0.383998	0.249	0.069	7.95747e-41	6	Plcxd2
Pcnx2	4.52471e-45	0.32977	0.279	0.089	1.14425e-40	6	Pcnx2
Fam19a1	6.96551e-45	0.340563	0.407	0.179	1.76151e-40	6	Fam19a1
Lhfpl3	7.03225e-45	0.31842	0.361	0.146	1.77839e-40	6	Lhfpl3
Rpl36a	7.59618e-45	-0.417992	0.552	0.64	1.921e-40	6	Rpl36a
Tspan12	8.57181e-45	0.312167	0.33	0.123	2.16773e-40	6	Tspan12
Phf24	1.16164e-44	-0.51658	0.197	0.4	2.93768e-40	6	Phf24
Rpl39	1.25755e-44	-0.374484	0.59	0.654	3.18022e-40	6	Rpl39
Tuba1b	1.27519e-44	-0.377935	0.692	0.764	3.22482e-40	6	Tuba1b
Rps20	2.10742e-44	-0.506197	0.387	0.531	5.32946e-40	6	Rps20
Extl2	2.53128e-44	0.380899	0.705	0.466	6.40136e-40	6	Extl2
Gfra1	2.62285e-44	0.345676	0.863	0.744	6.63293e-40	6	Gfra1
Gng2	4.12405e-44	-0.441393	0.06	0.234	1.04293e-39	6	Gng2
Peg3	6.70191e-44	-0.440817	0.651	0.716	1.69485e-39	6	Peg3
Idi1	1.15337e-43	-0.60543	0.196	0.376	2.91677e-39	6	Idi1
Dnajc6	1.29792e-43	0.374385	0.557	0.309	3.28232e-39	6	Dnajc6
Cabp1	1.42248e-43	0.420869	0.535	0.295	3.59731e-39	6	Cabp1
Rps15	1.53042e-43	-0.466325	0.433	0.581	3.87027e-39	6	Rps15
Rpsa	2.12e-43	-0.355389	0.73	0.803	5.36127e-39	6	Rpsa
Rpl18a	4.87341e-43	-0.360978	0.706	0.762	1.23244e-38	6	Rpl18a
Btbd11	5.27987e-43	0.376966	0.431	0.202	1.33523e-38	6	Btbd11
Kctd12b	7.02471e-43	0.412426	0.281	0.093	1.77648e-38	6	Kctd12b
Scg2	7.10397e-43	-0.524486	0.526	0.684	1.79652e-38	6	Scg2
Dab2ip	7.44614e-43	0.280755	0.236	0.067	1.88305e-38	6	Dab2ip
Msmo1	2.45789e-42	-0.636205	0.201	0.385	6.21577e-38	6	Msmo1
Map6d1	2.65093e-42	0.298253	0.171	0.031	6.70394e-38	6	Map6d1
Rps11	2.94561e-42	-0.393765	0.662	0.746	7.44915e-38	6	Rps11
Rps25	2.94841e-42	-0.411151	0.67	0.729	7.45625e-38	6	Rps25
Scamp1	6.21471e-42	0.388628	0.796	0.611	1.57164e-37	6	Scamp1
Eef1g	6.39561e-42	-0.352865	0.721	0.782	1.61739e-37	6	Eef1g
Pnmal1	1.13677e-41	-0.476814	0.378	0.539	2.87479e-37	6	Pnmal1
Atp1a1	1.22232e-41	-0.486509	0.699	0.749	3.09113e-37	6	Atp1a1
Hpcal4	1.24145e-41	-0.4312	0.079	0.249	3.1395e-37	6	Hpcal4
Mt1	1.35237e-41	0.376468	0.52	0.281	3.42001e-37	6	Mt1
Luzp2	1.48463e-41	-0.402232	0.024	0.162	3.75449e-37	6	Luzp2
Spire2	1.72348e-41	0.254401	0.297	0.109	4.3585e-37	6	Spire2
Rgs2	5.57014e-41	0.416551	0.4	0.182	1.40863e-36	6	Rgs2
Pkia	7.44312e-41	0.422758	0.659	0.431	1.88229e-36	6	Pkia
Tmem255a	8.2791e-41	-0.448628	0.083	0.255	2.0937e-36	6	Tmem255a
Galnt2	1.20086e-40	0.399791	0.364	0.156	3.03686e-36	6	Galnt2
Lsp1	1.62321e-40	0.261068	0.122	0.012	4.10494e-36	6	Lsp1
Apba2	2.27319e-40	0.41611	0.472	0.244	5.74867e-36	6	Apba2
Rab6b	4.80674e-40	0.357182	0.658	0.421	1.21558e-35	6	Rab6b
Smoc1	6.92381e-40	0.26407	0.136	0.018	1.75096e-35	6	Smoc1
Pdp1	8.32314e-40	0.338889	0.43	0.209	2.10484e-35	6	Pdp1
Gm5741	8.81767e-40	0.445466	0.701	0.469	2.2299e-35	6	Gm5741
Caly	9.78719e-40	-0.456017	0.479	0.604	2.47508e-35	6	Caly
Rps10	1.36565e-39	-0.347016	0.654	0.71	3.45359e-35	6	Rps10
Ptgds	1.78067e-39	-0.545787	0.047	0.193	4.50314e-35	6	Ptgds
Rps7	1.9325e-39	-0.33382	0.757	0.81	4.88709e-35	6	Rps7
Spry4	4.41638e-39	0.256297	0.195	0.048	1.11686e-34	6	Spry4
Epha7	4.63352e-39	0.356043	0.561	0.327	1.17177e-34	6	Epha7
Pkm	4.78374e-39	0.280442	0.919	0.849	1.20976e-34	6	Pkm
Nrip1	4.86212e-39	0.28122	0.244	0.078	1.22958e-34	6	Nrip1
Tuba4a	5.3183e-39	0.352266	0.4	0.188	1.34495e-34	6	Tuba4a
Lix1	7.36539e-39	0.40159	0.488	0.262	1.86263e-34	6	Lix1
Adgrb2	1.18838e-38	-0.335519	0.024	0.152	3.00529e-34	6	Adgrb2
Ghitm	2.36994e-38	0.335526	0.873	0.77	5.99334e-34	6	Ghitm
Slc29a1	2.7528e-38	0.405393	0.51	0.285	6.96156e-34	6	Slc29a1
Tnr	3.37613e-38	-0.423994	0.352	0.479	8.5379e-34	6	Tnr
Trnp1	3.94755e-38	0.366883	0.455	0.234	9.98295e-34	6	Trnp1
Lin7a	4.55574e-38	-0.310374	0.01	0.12	1.1521e-33	6	Lin7a
Gnb1	6.90025e-38	0.339581	0.842	0.715	1.745e-33	6	Gnb1
Aars	7.5824e-38	0.335878	0.642	0.412	1.91751e-33	6	Aars
Slc6a8	7.62667e-38	0.30977	0.363	0.161	1.92871e-33	6	Slc6a8
AF529169	1.13173e-37	0.365562	0.568	0.337	2.86203e-33	6	AF529169
Tubb2b	1.19327e-37	-0.647123	0.237	0.411	3.01766e-33	6	Tubb2b
Cend1	1.96308e-37	0.320861	0.72	0.502	4.96444e-33	6	Cend1
Pxmp4	2.92587e-37	0.310881	0.275	0.099	7.39922e-33	6	Pxmp4
Ppp1r1b	3.80464e-37	0.358831	0.595	0.366	9.62154e-33	6	Ppp1r1b
Atrnl1	4.06635e-37	0.348438	0.251	0.083	1.02834e-32	6	Atrnl1
Plcl1	4.29936e-37	0.36523	0.537	0.31	1.08726e-32	6	Plcl1
Atp8a1	4.31678e-37	-0.463282	0.126	0.3	1.09167e-32	6	Atp8a1
Btg1	7.35302e-37	-0.529603	0.239	0.406	1.8595e-32	6	Btg1
Tapbp	8.11414e-37	-0.493017	0.326	0.481	2.05199e-32	6	Tapbp
Ldlr	9.70985e-37	-0.400557	0.035	0.171	2.45552e-32	6	Ldlr
Tfrc	9.97338e-37	0.427755	0.625	0.403	2.52217e-32	6	Tfrc
Ebf3	1.57439e-36	0.338637	0.108	0.01	3.98148e-32	6	Ebf3
Rbms1	3.18821e-36	0.250498	0.555	0.332	8.06266e-32	6	Rbms1
Dpysl5	4.2033e-36	0.306866	0.372	0.173	1.06297e-31	6	Dpysl5
Yjefn3	4.82824e-36	0.306994	0.261	0.092	1.22101e-31	6	Yjefn3
Hmgcr	6.0721e-36	-0.570896	0.176	0.341	1.53557e-31	6	Hmgcr
Bex2	6.9161e-36	-0.407624	0.491	0.573	1.74901e-31	6	Bex2
Pcdh19	7.12254e-36	-0.358108	0.019	0.135	1.80122e-31	6	Pcdh19
Dusp1	7.51057e-36	-0.714787	0.082	0.236	1.89935e-31	6	Dusp1
Plppr3	8.73114e-36	-0.433805	0.101	0.259	2.20802e-31	6	Plppr3
Mrpl18	9.34097e-36	0.317718	0.438	0.227	2.36224e-31	6	Mrpl18
Pbx3	1.13065e-35	-0.414105	0.514	0.607	2.8593e-31	6	Pbx3
Cdhr1	1.54984e-35	-0.302128	0.011	0.116	3.91939e-31	6	Cdhr1
Agtpbp1	1.5606e-35	0.317596	0.581	0.356	3.94661e-31	6	Agtpbp1
Bex1	2.54442e-35	-0.403999	0.414	0.559	6.43458e-31	6	Bex1
Bcl11a	2.90433e-35	0.314684	0.418	0.212	7.34476e-31	6	Bcl11a
Arap2	3.75399e-35	0.292401	0.167	0.038	9.49346e-31	6	Arap2
Map4k2	4.97207e-35	0.321613	0.438	0.228	1.25739e-30	6	Map4k2
Lrtm2	5.83816e-35	0.324109	0.337	0.148	1.47641e-30	6	Lrtm2
Chmp4b	5.96357e-35	0.306813	0.873	0.765	1.50813e-30	6	Chmp4b
Akt1	6.39306e-35	-0.427935	0.277	0.442	1.61674e-30	6	Akt1
Rps15a	6.39584e-35	-0.356877	0.661	0.714	1.61744e-30	6	Rps15a
Ncam1	6.73411e-35	-0.402196	0.529	0.589	1.70299e-30	6	Ncam1
Gpx3	7.60406e-35	-0.413756	0.069	0.204	1.92299e-30	6	Gpx3
Arl4c	8.91146e-35	-0.455542	0.16	0.327	2.25362e-30	6	Arl4c
Pdgfa	1.42779e-34	-0.372681	0.027	0.148	3.61074e-30	6	Pdgfa
Camk2b	1.55357e-34	0.342256	0.771	0.61	3.92883e-30	6	Camk2b
Tgfb2	2.33683e-34	0.264945	0.504	0.291	5.9096e-30	6	Tgfb2
Fam19a4	2.64284e-34	-0.505719	0.15	0.312	6.68348e-30	6	Fam19a4
Gprasp2	2.64547e-34	-0.396522	0.632	0.71	6.69013e-30	6	Gprasp2
B930095G15Rik	3.45368e-34	0.289386	0.362	0.17	8.73402e-30	6	B930095G15Rik
Mmp17	4.81446e-34	0.321678	0.34	0.153	1.21753e-29	6	Mmp17
Eps15	6.59506e-34	0.376044	0.471	0.259	1.66783e-29	6	Eps15
Garnl3	7.4336e-34	0.31495	0.479	0.267	1.87988e-29	6	Garnl3
Gdf11	9.55165e-34	0.30052	0.464	0.255	2.41552e-29	6	Gdf11
Trim37	1.35421e-33	0.301752	0.555	0.336	3.42466e-29	6	Trim37
Tub	1.54118e-33	-0.407817	0.448	0.547	3.8975e-29	6	Tub
Fam63b	1.54773e-33	0.35319	0.683	0.477	3.91404e-29	6	Fam63b
Tenm3	1.84148e-33	-0.321401	0.021	0.136	4.65691e-29	6	Tenm3
Tmod2	2.12117e-33	0.348513	0.668	0.461	5.36423e-29	6	Tmod2
Kif26a	2.76813e-33	-0.487096	0.043	0.172	7.00033e-29	6	Kif26a
Camkk2	3.04592e-33	0.326331	0.233	0.079	7.70282e-29	6	Camkk2
Tenm1	3.78136e-33	0.318037	0.279	0.111	9.56268e-29	6	Tenm1
Krt222	4.00975e-33	0.260536	0.323	0.144	1.01403e-28	6	Krt222
Ehbp1l1	4.18529e-33	-0.369583	0.049	0.186	1.05842e-28	6	Ehbp1l1
Rpl6	4.96277e-33	-0.352712	0.548	0.628	1.25504e-28	6	Rpl6
Mapre2	5.18406e-33	0.319991	0.768	0.596	1.311e-28	6	Mapre2
Gm10053	5.57015e-33	0.305045	0.815	0.649	1.40863e-28	6	Gm10053
St8sia1	6.1077e-33	0.269743	0.286	0.116	1.54458e-28	6	St8sia1
Egr1	7.22515e-33	-0.830439	0.066	0.201	1.82717e-28	6	Egr1
Eef1b2	9.28902e-33	-0.361688	0.599	0.665	2.3491e-28	6	Eef1b2
Ypel3	9.8576e-33	0.310289	0.683	0.474	2.49289e-28	6	Ypel3
Rack1	1.10071e-32	-0.342017	0.574	0.64	2.78359e-28	6	Rack1
Rell2	1.20628e-32	0.268429	0.465	0.261	3.05056e-28	6	Rell2
Zbtb18	1.2878e-32	0.303847	0.273	0.107	3.25671e-28	6	Zbtb18
Klhl13	1.74105e-32	-0.43193	0.26	0.429	4.40295e-28	6	Klhl13
Uhrf1bp1l	2.87538e-32	0.30187	0.587	0.372	7.27156e-28	6	Uhrf1bp1l
Msi2	3.22395e-32	0.270593	0.884	0.79	8.15305e-28	6	Msi2
Cxx1b	5.74098e-32	0.334742	0.754	0.58	1.45184e-27	6	Cxx1b
Slitrk5	7.16175e-32	0.288966	0.266	0.105	1.81113e-27	6	Slitrk5
Ccdc184	7.48319e-32	-0.374752	0.062	0.202	1.89242e-27	6	Ccdc184
Pou6f2	8.16341e-32	-0.407158	0.082	0.233	2.06445e-27	6	Pou6f2
Cap2	8.63047e-32	0.254703	0.192	0.058	2.18256e-27	6	Cap2
C530008M17Rik	8.73535e-32	0.311731	0.68	0.472	2.20908e-27	6	C530008M17Rik
Dck	9.07111e-32	0.310961	0.365	0.177	2.29399e-27	6	Dck
L3mbtl3	9.44315e-32	0.256949	0.139	0.028	2.38808e-27	6	L3mbtl3
Pkib	1.19437e-31	0.321558	0.364	0.177	3.02044e-27	6	Pkib
Pim1	1.50732e-31	0.252835	0.19	0.056	3.81187e-27	6	Pim1
Fos	1.91149e-31	-0.8481	0.158	0.326	4.83398e-27	6	Fos
Asap1	2.20787e-31	0.274014	0.367	0.181	5.58349e-27	6	Asap1
Amph	2.68336e-31	-0.338696	0.517	0.568	6.78596e-27	6	Amph
Zfas1	2.71655e-31	-0.421289	0.375	0.525	6.86988e-27	6	Zfas1
Cmbl	2.93182e-31	-0.369293	0.06	0.19	7.41429e-27	6	Cmbl
Mmgt1	5.68015e-31	0.270554	0.362	0.181	1.43645e-26	6	Mmgt1
Cmip	5.72433e-31	-0.336488	0.527	0.581	1.44763e-26	6	Cmip
Ndrg3	5.74441e-31	0.287511	0.825	0.679	1.4527e-26	6	Ndrg3
Epha5	8.77376e-31	0.330003	0.455	0.255	2.2188e-26	6	Epha5
Cycs	8.84846e-31	0.304853	0.734	0.541	2.23769e-26	6	Cycs
Osbpl9	1.71945e-30	0.25602	0.491	0.29	4.34832e-26	6	Osbpl9
Ppm1e	2.29244e-30	0.329834	0.523	0.318	5.79736e-26	6	Ppm1e
Scn2b	2.29809e-30	0.295224	0.593	0.387	5.81163e-26	6	Scn2b
Atp5b	3.48119e-30	0.271022	0.89	0.809	8.80359e-26	6	Atp5b
Id4	3.48599e-30	-0.407957	0.078	0.213	8.81572e-26	6	Id4
Foxp2	3.62471e-30	-0.491307	0.229	0.333	9.16653e-26	6	Foxp2
Atp1a3	3.66992e-30	0.309224	0.465	0.265	9.28086e-26	6	Atp1a3
Ccdc74a	4.09742e-30	0.288061	0.18	0.052	1.0362e-25	6	Ccdc74a
Scube1	4.48282e-30	0.280612	0.622	0.415	1.13366e-25	6	Scube1
B3gat1	4.84279e-30	0.290061	0.841	0.697	1.22469e-25	6	B3gat1
Asb13	5.55555e-30	0.302287	0.333	0.158	1.40494e-25	6	Asb13
Sorcs2	6.96176e-30	0.318601	0.323	0.149	1.76056e-25	6	Sorcs2
Atp2b3	8.45165e-30	0.349836	0.429	0.236	2.13734e-25	6	Atp2b3
Cox5a	9.16415e-30	0.293704	0.834	0.697	2.31752e-25	6	Cox5a
Lsamp	1.05362e-29	0.313814	0.715	0.519	2.66449e-25	6	Lsamp
Idh3a	1.1617e-29	0.313258	0.748	0.569	2.93781e-25	6	Idh3a
Mvb12b	1.19121e-29	0.321272	0.669	0.474	3.01246e-25	6	Mvb12b
Pclo	1.33967e-29	0.30103	0.574	0.369	3.3879e-25	6	Pclo
Ptpdc1	1.44605e-29	-0.38647	0.479	0.544	3.65692e-25	6	Ptpdc1
Rpl18	1.46066e-29	-0.299667	0.596	0.658	3.69386e-25	6	Rpl18
Agap3	1.87795e-29	0.289779	0.606	0.4	4.74916e-25	6	Agap3
Gnai2	2.0049e-29	-0.398328	0.253	0.393	5.0702e-25	6	Gnai2
Rab3c	2.19255e-29	0.264012	0.262	0.11	5.54475e-25	6	Rab3c
Sbk1	2.4413e-29	0.289417	0.246	0.095	6.17382e-25	6	Sbk1
Pcsk1	2.65548e-29	-0.355455	0.04	0.16	6.71544e-25	6	Pcsk1
Stmn1	3.05623e-29	-0.512419	0.126	0.263	7.72891e-25	6	Stmn1
Sncg	3.19011e-29	-0.417395	0.564	0.672	8.06747e-25	6	Sncg
Sv2a	3.56982e-29	0.25395	0.87	0.769	9.02772e-25	6	Sv2a
Bzw1	3.71862e-29	0.272554	0.421	0.232	9.40402e-25	6	Bzw1
Efhd2	4.15006e-29	0.311363	0.353	0.175	1.04951e-24	6	Efhd2
Col5a3	4.15845e-29	-0.256629	0.022	0.127	1.05163e-24	6	Col5a3
Pex5l	4.64109e-29	0.265663	0.304	0.139	1.17369e-24	6	Pex5l
Fam49b	5.38586e-29	0.332926	0.666	0.472	1.36203e-24	6	Fam49b
Fdps	5.39817e-29	-0.425774	0.121	0.261	1.36514e-24	6	Fdps
Kcnb1	5.5381e-29	0.279276	0.52	0.321	1.40053e-24	6	Kcnb1
Camk2g	5.58391e-29	0.267686	0.497	0.299	1.41212e-24	6	Camk2g
Rpl36al	5.7456e-29	-0.336093	0.458	0.519	1.453e-24	6	Rpl36al
Tax1bp1	6.09236e-29	0.26304	0.587	0.383	1.5407e-24	6	Tax1bp1
Mical2	7.61612e-29	0.250125	0.129	0.026	1.92604e-24	6	Mical2
Rasgef1b	8.11355e-29	0.283826	0.464	0.27	2.05184e-24	6	Rasgef1b
Bend6	9.91367e-29	0.346699	0.477	0.282	2.50707e-24	6	Bend6
Tagln3	1.03949e-28	0.298729	0.665	0.466	2.62875e-24	6	Tagln3
Enpp5	1.08377e-28	0.27735	0.554	0.352	2.74074e-24	6	Enpp5
Slc7a8	1.10026e-28	-0.39212	0.103	0.23	2.78245e-24	6	Slc7a8
Paip2	1.19794e-28	0.315654	0.758	0.586	3.02948e-24	6	Paip2
Lrrc10b	1.21673e-28	-0.296098	0.03	0.139	3.077e-24	6	Lrrc10b
Scd2	1.24279e-28	-0.447112	0.302	0.389	3.14289e-24	6	Scd2
Aes	1.41028e-28	0.274924	0.853	0.746	3.56646e-24	6	Aes
Dusp18	1.43014e-28	-0.452997	0.076	0.215	3.61669e-24	6	Dusp18
Parm1	1.62899e-28	-0.397526	0.094	0.232	4.11956e-24	6	Parm1
Pdcd4	1.81035e-28	-0.448224	0.236	0.388	4.57818e-24	6	Pdcd4
Jun	1.83659e-28	-0.656598	0.074	0.2	4.64456e-24	6	Jun
X1810041L15Rik	2.03513e-28	0.267875	0.85	0.701	5.14664e-24	6	X1810041L15Rik
Car2	2.40546e-28	0.420694	0.135	0.031	6.08317e-24	6	Car2
Tmem222	2.52481e-28	0.294386	0.539	0.34	6.38499e-24	6	Tmem222
Chn1	3.79311e-28	0.276552	0.628	0.428	9.5924e-24	6	Chn1
Snap47	4.53022e-28	0.281605	0.821	0.681	1.14565e-23	6	Snap47
Rpl5	6.56418e-28	-0.320064	0.633	0.696	1.66001e-23	6	Rpl5
Maob	6.67112e-28	-0.29377	0.027	0.133	1.68706e-23	6	Maob
Slc25a1	8.00351e-28	-0.396259	0.286	0.413	2.02401e-23	6	Slc25a1
Ublcp1	9.33842e-28	0.2751	0.47	0.278	2.36159e-23	6	Ublcp1
Sox5	1.36851e-27	-0.427972	0.217	0.373	3.46082e-23	6	Sox5
Lsm11	1.61828e-27	0.27626	0.278	0.123	4.09248e-23	6	Lsm11
Rgs17	1.66839e-27	-0.372848	0.208	0.354	4.21919e-23	6	Rgs17
Mapk4	2.96818e-27	0.272747	0.347	0.177	7.50624e-23	6	Mapk4
Cep170b	3.0396e-27	-0.417669	0.201	0.341	7.68685e-23	6	Cep170b
Gpr151	3.08253e-27	-0.388934	0.647	0.722	7.79541e-23	6	Gpr151
Pygm	3.64595e-27	-0.294471	0.014	0.102	9.22025e-23	6	Pygm
Hs6st2	3.87803e-27	0.270658	0.566	0.369	9.80714e-23	6	Hs6st2
Atp5f1	4.19357e-27	0.273168	0.809	0.687	1.06051e-22	6	Atp5f1
Trp53i11	4.1947e-27	0.267152	0.799	0.634	1.0608e-22	6	Trp53i11
Scrt1	4.31821e-27	0.266626	0.311	0.148	1.09203e-22	6	Scrt1
Fry	4.39608e-27	0.28318	0.696	0.509	1.11172e-22	6	Fry
Hmgcs1	4.99631e-27	-0.483774	0.353	0.444	1.26352e-22	6	Hmgcs1
Nacc2	6.21363e-27	0.284393	0.28	0.125	1.57136e-22	6	Nacc2
Fdft1	6.35638e-27	-0.370939	0.171	0.321	1.60746e-22	6	Fdft1
Ntrk3	6.62624e-27	0.274072	0.452	0.266	1.67571e-22	6	Ntrk3
Rpl10a	7.42487e-27	-0.367952	0.477	0.571	1.87768e-22	6	Rpl10a
Nr4a3	8.00457e-27	-0.368384	0.088	0.211	2.02428e-22	6	Nr4a3
Nkain2	1.46293e-26	0.259089	0.348	0.181	3.69961e-22	6	Nkain2
Capzb	1.85139e-26	0.25161	0.77	0.593	4.68197e-22	6	Capzb
Rpl11	2.08499e-26	-0.370923	0.258	0.392	5.27273e-22	6	Rpl11
Klf6	2.18815e-26	-0.517489	0.139	0.271	5.53362e-22	6	Klf6
Plxna2	2.48627e-26	-0.350182	0.047	0.162	6.28753e-22	6	Plxna2
2019-09-11	2.67925e-26	0.290595	0.346	0.178	6.77555e-22	6	2019-09-11
Fosb	4.48415e-26	-0.616646	0.123	0.256	1.134e-21	6	Fosb
Purg	4.53099e-26	0.277851	0.291	0.136	1.14584e-21	6	Purg
Amigo2	5.86521e-26	-0.390178	0.593	0.648	1.48325e-21	6	Amigo2
Asic2	8.15175e-26	0.257736	0.276	0.126	2.0615e-21	6	Asic2
Fam57a	9.68793e-26	-0.37223	0.04	0.143	2.44998e-21	6	Fam57a
Gm17541	9.84708e-26	-0.357382	0.386	0.487	2.49023e-21	6	Gm17541
Sec22b	1.02804e-25	0.259209	0.514	0.328	2.59981e-21	6	Sec22b
Rnd2	1.05143e-25	0.274461	0.492	0.305	2.65896e-21	6	Rnd2
Nsf	1.17963e-25	0.255768	0.771	0.602	2.98317e-21	6	Nsf
Rpl41	1.27974e-25	-0.307128	0.597	0.658	3.23634e-21	6	Rpl41
Taok1	1.58134e-25	0.265922	0.799	0.642	3.99905e-21	6	Taok1
Clstn2	2.17397e-25	-0.344395	0.126	0.264	5.49776e-21	6	Clstn2
X2010204K13Rik	2.19644e-25	-0.40807	0.14	0.278	5.55459e-21	6	X2010204K13Rik
Mxd4	2.23916e-25	0.261335	0.253	0.11	5.66261e-21	6	Mxd4
Itpr1	2.36728e-25	-0.346667	0.054	0.165	5.98661e-21	6	Itpr1
Fabp5	2.82577e-25	-0.457874	0.092	0.204	7.14608e-21	6	Fabp5
Sar1b	4.89469e-25	0.27762	0.526	0.339	1.23782e-20	6	Sar1b
Gdap1l1	5.93327e-25	0.250846	0.355	0.192	1.50046e-20	6	Gdap1l1
Tcaf1	6.11492e-25	0.259733	0.81	0.675	1.5464e-20	6	Tcaf1
Scn9a	6.37933e-25	-0.363264	0.08	0.209	1.61327e-20	6	Scn9a
Pnck	8.55552e-25	-0.390701	0.256	0.389	2.16361e-20	6	Pnck
Sh3gl2	9.27046e-25	0.250784	0.817	0.678	2.34441e-20	6	Sh3gl2
Dnajc12	9.87764e-25	-0.343552	0.314	0.409	2.49796e-20	6	Dnajc12
Pxylp1	1.5885e-24	0.287656	0.384	0.214	4.01716e-20	6	Pxylp1
Tsc22d1	2.03768e-24	0.260486	0.801	0.657	5.15308e-20	6	Tsc22d1
Cnih1	2.35113e-24	0.255758	0.616	0.431	5.94577e-20	6	Cnih1
Clip3	2.51781e-24	0.263187	0.744	0.576	6.36729e-20	6	Clip3
Tubb5	2.87449e-24	-0.310282	0.552	0.613	7.26929e-20	6	Tubb5
Dnm1	3.46914e-24	0.252224	0.562	0.377	8.77312e-20	6	Dnm1
Nfe2l1	3.65961e-24	0.310369	0.717	0.556	9.25478e-20	6	Nfe2l1
Sgsm1	3.75495e-24	-0.362745	0.305	0.392	9.49589e-20	6	Sgsm1
Vangl1	3.99438e-24	-0.382653	0.262	0.354	1.01014e-19	6	Vangl1
Atp2a2	4.00844e-24	0.29091	0.748	0.596	1.0137e-19	6	Atp2a2
Sdhc	4.20763e-24	0.256464	0.724	0.552	1.06407e-19	6	Sdhc
Negr1	4.39189e-24	-0.403306	0.329	0.402	1.11067e-19	6	Negr1
Elfn1	4.64554e-24	-0.331939	0.423	0.498	1.17481e-19	6	Elfn1
Nt5dc3	1.02038e-23	0.276019	0.485	0.306	2.58043e-19	6	Nt5dc3
L1cam	1.05147e-23	-0.309597	0.13	0.243	2.65905e-19	6	L1cam
Lrp11	1.13162e-23	0.269721	0.661	0.483	2.86177e-19	6	Lrp11
Pdxk	1.47622e-23	-0.315877	0.558	0.609	3.73322e-19	6	Pdxk
Hsd3b2	1.72644e-23	-0.317084	0.515	0.575	4.366e-19	6	Hsd3b2
Rap2a	1.80754e-23	-0.368401	0.275	0.373	4.57108e-19	6	Rap2a
Trim32	2.21444e-23	0.270082	0.669	0.493	5.60009e-19	6	Trim32
Sat1	2.53567e-23	0.281632	0.201	0.078	6.41246e-19	6	Sat1
Cdh22	2.6559e-23	0.30421	0.383	0.217	6.71651e-19	6	Cdh22
Crmp1	3.06306e-23	0.281218	0.735	0.573	7.74619e-19	6	Crmp1
Insig1	3.86605e-23	-0.416727	0.201	0.312	9.77686e-19	6	Insig1
Dbn1	4.54367e-23	-0.334567	0.423	0.501	1.14905e-18	6	Dbn1
Tat	4.74933e-23	-0.252569	0.019	0.104	1.20106e-18	6	Tat
Rcn1	5.69414e-23	-0.315634	0.09	0.208	1.43999e-18	6	Rcn1
Efnb1	6.1615e-23	-0.27543	0.05	0.154	1.55818e-18	6	Efnb1
Spop	6.28465e-23	0.274218	0.757	0.601	1.58933e-18	6	Spop
Chgb	7.62863e-23	0.263752	0.722	0.552	1.9292e-18	6	Chgb
Tox	1.11689e-22	-0.33974	0.049	0.146	2.82451e-18	6	Tox
Cdk16	1.14586e-22	0.253553	0.455	0.282	2.89776e-18	6	Cdk16
Mtss1	1.63172e-22	-0.365055	0.384	0.487	4.12646e-18	6	Mtss1
Tmem178	1.6799e-22	-0.307825	0.052	0.155	4.24831e-18	6	Tmem178
Gucy1b3	1.69047e-22	0.250249	0.751	0.589	4.27504e-18	6	Gucy1b3
Ckb	2.40535e-22	0.273851	0.729	0.572	6.08289e-18	6	Ckb
Tubb4a	3.57579e-22	0.27573	0.6	0.425	9.04281e-18	6	Tubb4a
Zmiz1	4.3745e-22	-0.381652	0.195	0.313	1.10627e-17	6	Zmiz1
Cnnm2	4.39374e-22	0.280221	0.516	0.342	1.11113e-17	6	Cnnm2
Ddx39b	5.76858e-22	0.250082	0.735	0.571	1.45882e-17	6	Ddx39b
Socs2	5.95168e-22	0.275035	0.366	0.21	1.50512e-17	6	Socs2
Rpl7a	6.00694e-22	-0.265954	0.416	0.472	1.5191e-17	6	Rpl7a
Thsd7b	1.20675e-21	-0.310604	0.069	0.177	3.05175e-17	6	Thsd7b
Bcl11b	1.33712e-21	-0.342581	0.062	0.169	3.38144e-17	6	Bcl11b
Tmcc2	1.92939e-21	0.259718	0.588	0.415	4.87923e-17	6	Tmcc2
Ap1s2	2.25847e-21	-0.354439	0.101	0.206	5.71145e-17	6	Ap1s2
Lpar1	2.44602e-21	-0.398937	0.083	0.186	6.18573e-17	6	Lpar1
Nck2	2.56752e-21	0.285774	0.319	0.171	6.493e-17	6	Nck2
Celf3	3.18573e-21	-0.340299	0.458	0.559	8.05638e-17	6	Celf3
Tmcc3	3.38419e-21	-0.360179	0.151	0.256	8.55827e-17	6	Tmcc3
Rpl12	3.39717e-21	-0.31994	0.574	0.637	8.59111e-17	6	Rpl12
Kcnmb4os2	4.97978e-21	-0.315458	0.069	0.17	1.25934e-16	6	Kcnmb4os2
Cdh13	6.05698e-21	-0.302797	0.14	0.266	1.53175e-16	6	Cdh13
Fkbp1a	6.69631e-21	0.271696	0.805	0.696	1.69343e-16	6	Fkbp1a
Camta1	1.43299e-20	-0.335703	0.469	0.525	3.62388e-16	6	Camta1
Gpr26	1.48964e-20	0.29582	0.423	0.262	3.76715e-16	6	Gpr26
Lhfpl4	1.64416e-20	0.268298	0.599	0.43	4.15792e-16	6	Lhfpl4
Tspyl2	2.06752e-20	-0.331477	0.259	0.37	5.22856e-16	6	Tspyl2
X2410006H16Rik	2.18863e-20	-0.338667	0.162	0.268	5.53483e-16	6	X2410006H16Rik
Cnr1	2.635e-20	-0.382402	0.34	0.444	6.66364e-16	6	Cnr1
Got2	3.61859e-20	0.251763	0.702	0.549	9.15104e-16	6	Got2
Cystm1	4.61791e-20	-0.297811	0.296	0.383	1.16782e-15	6	Cystm1
Slc6a7	5.21352e-20	-0.289961	0.08	0.192	1.31845e-15	6	Slc6a7
Eif4e3	5.32167e-20	-0.332034	0.089	0.194	1.3458e-15	6	Eif4e3
Rplp2	5.53365e-20	-0.348788	0.137	0.26	1.3994e-15	6	Rplp2
Tusc3	7.20785e-20	-0.283796	0.481	0.542	1.82279e-15	6	Tusc3
Kctd4	8.40025e-20	-0.275404	0.105	0.222	2.12434e-15	6	Kctd4
Bex4	1.06921e-19	-0.366658	0.301	0.409	2.70393e-15	6	Bex4
Parvb	1.34844e-19	-0.271888	0.112	0.232	3.41007e-15	6	Parvb
Klhdc8b	1.49299e-19	-0.299927	0.44	0.51	3.77563e-15	6	Klhdc8b
Magi1	1.56448e-19	-0.308822	0.268	0.333	3.95641e-15	6	Magi1
Rhob	1.76448e-19	-0.293212	0.095	0.2	4.46219e-15	6	Rhob
Sqle	1.76778e-19	-0.366083	0.187	0.296	4.47053e-15	6	Sqle
Pafah1b3	2.25094e-19	-0.312535	0.19	0.279	5.69241e-15	6	Pafah1b3
Jam3	2.55739e-19	-0.384318	0.283	0.382	6.46739e-15	6	Jam3
Rps26	2.66102e-19	-0.304467	0.317	0.393	6.72945e-15	6	Rps26
Vstm2a	3.77092e-19	-0.306009	0.197	0.267	9.53629e-15	6	Vstm2a
Mmd2	4.00614e-19	-0.27474	0.053	0.149	1.01311e-14	6	Mmd2
Mpped1	4.03702e-19	-0.286936	0.08	0.187	1.02092e-14	6	Mpped1
Pld3	4.50248e-19	-0.304224	0.35	0.434	1.13863e-14	6	Pld3
Cd59a	4.90508e-19	-0.301595	0.069	0.164	1.24045e-14	6	Cd59a
Dpp10	5.40225e-19	0.256292	0.757	0.611	1.36618e-14	6	Dpp10
Gm9493	8.20282e-19	-0.344293	0.172	0.286	2.07441e-14	6	Gm9493
Sirpa	8.24898e-19	0.254719	0.182	0.075	2.08609e-14	6	Sirpa
Plppr1	9.05862e-19	-0.313576	0.2	0.277	2.29083e-14	6	Plppr1
Islr2	9.30657e-19	-0.29874	0.044	0.128	2.35354e-14	6	Islr2
Dhcr24	1.19452e-18	-0.273116	0.043	0.133	3.02083e-14	6	Dhcr24
Nenf	1.9157e-18	-0.278359	0.163	0.241	4.84461e-14	6	Nenf
Vta1	2.11656e-18	0.295524	0.408	0.257	5.35257e-14	6	Vta1
Col8a2	2.43789e-18	-0.274534	0.059	0.15	6.16518e-14	6	Col8a2
Cd200	4.96548e-18	-0.308965	0.252	0.361	1.25572e-13	6	Cd200
Wdr6	7.82824e-18	-0.270942	0.491	0.553	1.97968e-13	6	Wdr6
Tmem59l	9.61965e-18	-0.279003	0.33	0.411	2.43271e-13	6	Tmem59l
Cyp51	1.00701e-17	-0.357943	0.251	0.343	2.54664e-13	6	Cyp51
Pfkm	1.10132e-17	-0.287337	0.115	0.217	2.78512e-13	6	Pfkm
Fasn	1.39889e-17	-0.286299	0.267	0.35	3.53765e-13	6	Fasn
Ccdc141	1.66448e-17	-0.328014	0.396	0.477	4.2093e-13	6	Ccdc141
Brinp1	2.19515e-17	-0.308756	0.146	0.227	5.55132e-13	6	Brinp1
Ly6h	2.51937e-17	-0.259305	0.518	0.575	6.37123e-13	6	Ly6h
Pitpnm2	5.80977e-17	-0.250543	0.079	0.173	1.46923e-12	6	Pitpnm2
Tob1	7.20031e-17	-0.413234	0.16	0.27	1.82089e-12	6	Tob1
Sptssa	7.26508e-17	-0.304979	0.325	0.405	1.83727e-12	6	Sptssa
Samd11	1.21692e-16	-0.276422	0.073	0.157	3.07746e-12	6	Samd11
Adgrg1	1.96135e-16	-0.284856	0.138	0.246	4.96007e-12	6	Adgrg1
Elmo1	1.98288e-16	-0.250248	0.063	0.153	5.0145e-12	6	Elmo1
Erbb4	2.25629e-16	-0.29067	0.131	0.238	5.70593e-12	6	Erbb4
Sox4	2.69925e-16	-0.269346	0.308	0.367	6.82612e-12	6	Sox4
Ralgds	4.31927e-16	-0.2502	0.105	0.213	1.0923e-11	6	Ralgds
AI504432	8.22109e-16	-0.280261	0.083	0.181	2.07903e-11	6	AI504432
Nppa	1.05429e-15	-0.292042	0.3	0.362	2.66618e-11	6	Nppa
Rps13	1.85311e-15	-0.261575	0.386	0.438	4.68634e-11	6	Rps13
Zmym3	2.18149e-15	-0.291546	0.313	0.388	5.51677e-11	6	Zmym3
Slc12a2	2.32418e-15	-0.323822	0.158	0.229	5.87763e-11	6	Slc12a2
Manf	3.28258e-15	-0.263568	0.298	0.367	8.30132e-11	6	Manf
X2810403D21Rik	3.3927e-15	-0.301548	0.19	0.269	8.57981e-11	6	X2810403D21Rik
Hnrnph3	4.69895e-15	-0.264819	0.367	0.42	1.18832e-10	6	Hnrnph3
Tbca	5.88264e-15	-0.255791	0.475	0.531	1.48766e-10	6	Tbca
Mtus1	6.86757e-15	-0.28963	0.268	0.35	1.73674e-10	6	Mtus1
Slc6a6	7.55892e-15	-0.251398	0.388	0.453	1.91158e-10	6	Slc6a6
Gm8624	1.42043e-14	-0.264559	0.181	0.289	3.59213e-10	6	Gm8624
Nlgn1	1.52023e-14	-0.278653	0.163	0.263	3.84452e-10	6	Nlgn1
Plppr4	5.5553e-14	-0.325945	0.266	0.334	1.40488e-09	6	Plppr4
Aldoc	8.45863e-14	-0.285744	0.197	0.288	2.1391e-09	6	Aldoc
Gm2694	8.95216e-14	-0.254926	0.215	0.292	2.26391e-09	6	Gm2694
Myo1b	1.07579e-13	-0.283068	0.07	0.145	2.72057e-09	6	Myo1b
Amotl1	1.40717e-13	-0.278466	0.292	0.376	3.55859e-09	6	Amotl1
Gpr85	2.91319e-13	-0.259611	0.282	0.376	7.36717e-09	6	Gpr85
Prkch	3.08202e-13	-0.252692	0.111	0.194	7.79411e-09	6	Prkch
Cbfb	3.70984e-13	-0.252347	0.094	0.176	9.38182e-09	6	Cbfb
Rgmb	5.29853e-13	-0.26956	0.089	0.153	1.33995e-08	6	Rgmb
Nme2	5.52755e-13	-0.253779	0.339	0.395	1.39786e-08	6	Nme2
Acat2	6.14264e-13	-0.256653	0.197	0.263	1.55341e-08	6	Acat2
Ndrg2	6.73722e-13	-0.285727	0.121	0.204	1.70378e-08	6	Ndrg2
Rpl36	7.95649e-13	-0.275579	0.223	0.307	2.01212e-08	6	Rpl36
Cfap20	8.97256e-13	-0.253743	0.182	0.236	2.26907e-08	6	Cfap20
Mesdc2	9.03193e-13	-0.261193	0.25	0.309	2.28409e-08	6	Mesdc2
Nyap1	1.00489e-12	-0.31368	0.288	0.368	2.54127e-08	6	Nyap1
Idh1	1.15492e-12	-0.252902	0.195	0.285	2.92068e-08	6	Idh1
Snhg12	8.43242e-12	-0.280817	0.212	0.288	2.13247e-07	6	Snhg12
Snrpf	5.1263e-11	-0.250914	0.345	0.399	1.29639e-06	6	Snrpf
Lemd3	5.27135e-11	-0.268166	0.156	0.216	1.33307e-06	6	Lemd3
Stx3	7.04262e-11	-0.288373	0.13	0.197	1.78101e-06	6	Stx3
X1190002N15Rik	1.20447e-10	-0.263986	0.163	0.225	3.04599e-06	6	X1190002N15Rik
St5	2.44484e-10	-0.264067	0.175	0.254	6.18276e-06	6	St5
B230216N24Rik	1.47581e-09	-0.25127	0.061	0.112	3.73217e-05	6	B230216N24Rik
Prkca	3.0279e-09	-0.255468	0.141	0.21	7.65725e-05	6	Prkca
Ier5	2.54463e-06	-0.263689	0.131	0.191	0.0643512	6	Ier5
Prkcb1	1.34363e-97	0.74853	0.967	0.772	3.39789e-93	7	Prkcb
Synpr1	4.64501e-93	0.74389	0.99	0.777	1.17468e-88	7	Synpr
Ncald1	4.71395e-77	0.656784	0.967	0.796	1.19211e-72	7	Ncald
Fgf11	2.30724e-75	0.922272	0.747	0.261	5.83479e-71	7	Fgf1
Ctnnbip1	2.45186e-64	-0.836392	0.762	0.813	6.20052e-60	7	Ctnnbip1
Nnat1	2.48651e-64	-1.24027	0.323	0.649	6.28813e-60	7	Nnat
Gng81	2.60537e-62	-1.03211	0.288	0.658	6.58873e-58	7	Gng8
Cpne91	7.03896e-60	0.539745	0.962	0.759	1.78008e-55	7	Cpne9
Cplx11	1.04883e-52	0.44633	0.982	0.896	2.65238e-48	7	Cplx1
Pdzd81	1.21608e-51	0.638616	0.84	0.476	3.07534e-47	7	Pdzd8
Gpr1511	9.99662e-50	-0.859258	0.517	0.756	2.52805e-45	7	Gpr151
Igfbp71	6.46873e-49	0.479729	0.499	0.134	1.63588e-44	7	Igfbp7
Cbln41	1.60099e-48	0.590321	0.872	0.57	4.04876e-44	7	Cbln4
Slc24a21	1.98923e-48	0.550577	0.849	0.486	5.03056e-44	7	Slc24a2
Rapgef41	6.25679e-48	0.581201	0.877	0.569	1.58228e-43	7	Rapgef4
Frrs1l1	7.31826e-47	0.63509	0.864	0.566	1.85072e-42	7	Frrs1l
Chrnb31	5.09655e-42	0.483273	0.822	0.469	1.28887e-37	7	Chrnb3
Rbfox31	2.76849e-40	0.54442	0.89	0.655	7.00125e-36	7	Rbfox3
Cox141	2.09851e-39	0.502198	0.912	0.731	5.30692e-35	7	Cox14
Fos1	6.49587e-39	-1.13418	0.028	0.268	1.64274e-34	7	Fos
Efnb31	1.67389e-38	-0.755063	0.078	0.356	4.23309e-34	7	Efnb3
Tcf41	4.83687e-38	0.58695	0.697	0.344	1.22319e-33	7	Tcf4
Kcnip11	7.11716e-37	0.398318	0.957	0.804	1.79986e-32	7	Kcnip1
Kcnma11	9.47707e-37	0.355967	0.99	0.893	2.39666e-32	7	Kcnma1
Snap251	2.46566e-36	0.387637	0.978	0.894	6.23541e-32	7	Snap25
Slc5a71	6.8856e-36	0.499585	0.857	0.587	1.7413e-31	7	Slc5a7
Zcchc121	1.51667e-35	-0.606543	0.612	0.707	3.83552e-31	7	Zcchc12
Kcnmb41	2.13216e-35	-0.87216	0.145	0.423	5.39201e-31	7	Kcnmb4
Pcp4l11	6.71077e-34	0.423421	0.509	0.192	1.69709e-29	7	Pcp4l1
Syne11	6.83462e-34	0.395176	0.96	0.793	1.72841e-29	7	Syne1
X3632451O06Rik1	1.15474e-33	0.426332	0.86	0.576	2.92023e-29	7	X3632451O06Rik
Pld51	1.21021e-33	0.508009	0.802	0.515	3.06051e-29	7	Pld5
Scn8a1	2.85667e-33	0.499397	0.794	0.496	7.22423e-29	7	Scn8a
Atp1b1	3.17919e-33	0.355018	0.987	0.928	8.03985e-29	7	Atp1b1
Nrn11	5.36342e-33	0.338578	0.978	0.899	1.35635e-28	7	Nrn1
Sphkap1	1.05099e-32	0.436422	0.887	0.628	2.65785e-28	7	Sphkap
Lmo31	1.20889e-32	0.535877	0.597	0.272	3.05716e-28	7	Lmo3
Cadm21	2.02205e-32	0.47229	0.865	0.615	5.11356e-28	7	Cadm2
Amigo21	2.59957e-32	-0.678561	0.514	0.661	6.57406e-28	7	Amigo2
Atp2b31	3.3284e-32	0.539976	0.604	0.28	8.41719e-28	7	Atp2b3
Garnl31	4.78414e-32	0.425121	0.657	0.328	1.20986e-27	7	Garnl3
Got11	5.14152e-32	0.409231	0.943	0.787	1.30024e-27	7	Got1
Fosb1	2.05442e-31	-0.657576	0.017	0.213	5.19543e-27	7	Fosb
Rpl37a1	2.06566e-30	-0.624181	0.586	0.682	5.22384e-26	7	Rpl37a
Syndig1l1	2.23984e-30	0.48795	0.537	0.228	5.66434e-26	7	Syndig1l
Ly6e	5.30114e-30	0.381076	0.408	0.131	1.34061e-25	7	Ly6e
Snhg11	1.64325e-29	0.352933	0.97	0.869	4.15561e-25	7	Snhg11
Atp2b21	1.22398e-28	0.429458	0.679	0.373	3.09532e-24	7	Atp2b2
Hopx1	2.02807e-28	-0.581125	0.502	0.641	5.1288e-24	7	Hopx
Nrsn21	4.59225e-28	-0.598004	0.469	0.621	1.16133e-23	7	Nrsn2
Nfib1	8.60328e-28	0.32391	0.652	0.346	2.17568e-23	7	Nfib
Plxnc1	5.20777e-27	-0.54842	0.499	0.659	1.31699e-22	7	Plxnc1
Kcng41	5.27198e-27	-0.603915	0.092	0.332	1.33323e-22	7	Kcng4
Rspo41	8.47417e-27	-0.448183	0.013	0.18	2.14303e-22	7	Rspo4
Lynx11	1.30324e-26	0.420475	0.351	0.106	3.29577e-22	7	Lynx1
Ntm1	2.07005e-26	0.405396	0.592	0.296	5.23495e-22	7	Ntm
Clec18a1	3.36296e-26	0.386621	0.493	0.21	8.50459e-22	7	Clec18a
Nsf1	6.76228e-26	0.367436	0.892	0.669	1.71011e-21	7	Nsf
Kcnip31	1.23545e-25	0.288671	0.359	0.12	3.12434e-21	7	Kcnip3
Armt1	1.45145e-25	-0.574537	0.449	0.527	3.67057e-21	7	Armt1
Enho1	9.6317e-25	0.436736	0.666	0.389	2.43576e-20	7	Enho
Fibcd1	2.27717e-24	0.300739	0.652	0.366	5.75875e-20	7	Fibcd1
Satb1	6.89811e-24	0.343352	0.343	0.11	1.74446e-19	7	Satb1
Opcml	9.10356e-24	0.271943	0.844	0.589	2.3022e-19	7	Opcml
Ccdc74a1	2.46095e-23	0.422246	0.296	0.082	6.22349e-19	7	Ccdc74a
Nptx1	2.50708e-23	0.419735	0.797	0.546	6.34016e-19	7	Nptx1
Epha71	2.54598e-23	0.441947	0.705	0.439	6.43854e-19	7	Epha7
Necab31	3.47327e-23	0.306944	0.933	0.794	8.78354e-19	7	Necab3
Rasgrp11	4.26676e-23	0.384321	0.651	0.373	1.07902e-18	7	Rasgrp1
Ndn	6.80392e-23	-0.334074	0.879	0.821	1.72064e-18	7	Ndn
Nfix	7.22011e-23	0.310117	0.306	0.09	1.82589e-18	7	Nfix
Neurod21	1.52853e-22	0.260662	0.268	0.073	3.86549e-18	7	Neurod2
Nrcam1	2.13461e-22	0.317711	0.774	0.513	5.39823e-18	7	Nrcam
Tubb2b1	2.23051e-22	-0.777349	0.135	0.324	5.64073e-18	7	Tubb2b
Rpl361	3.45296e-22	-0.522911	0.133	0.299	8.73218e-18	7	Rpl36
Cadm11	7.90995e-22	-0.528607	0.606	0.689	2.00035e-17	7	Cadm1
Thy11	8.19006e-22	0.253847	0.982	0.911	2.07119e-17	7	Thy1
Sema5a1	8.60853e-22	0.342581	0.76	0.506	2.17701e-17	7	Sema5a
Dusp181	8.71707e-22	-0.419228	0.007	0.134	2.20446e-17	7	Dusp18
Pex5l1	1.21324e-21	0.39644	0.439	0.19	3.06816e-17	7	Pex5l
Cpne41	2.24255e-21	0.326128	0.889	0.692	5.67119e-17	7	Cpne4
X6030419C18Rik1	3.93939e-21	0.321944	0.729	0.468	9.96231e-17	7	X6030419C18Rik
Ppp2r1a	5.11454e-21	0.278511	0.933	0.785	1.29342e-16	7	Ppp2r1a
Igsf211	8.7984e-21	0.381334	0.343	0.123	2.22503e-16	7	Igsf21
Hsd3b21	1.00672e-20	-0.494853	0.464	0.558	2.54589e-16	7	Hsd3b2
Tmod21	1.37022e-20	0.315196	0.795	0.561	3.46514e-16	7	Tmod2
Tmem176b	1.74519e-20	0.384651	0.775	0.545	4.41341e-16	7	Tmem176b
Slc48a1	1.99468e-20	0.352785	0.429	0.189	5.04435e-16	7	Slc48a1
Pkia1	2.32329e-20	0.306514	0.79	0.548	5.87537e-16	7	Pkia
Slc18a31	3.1072e-20	0.288855	0.572	0.314	7.8578e-16	7	Slc18a3
Usp251	3.13514e-20	0.406692	0.421	0.183	7.92846e-16	7	Usp25
Syt151	8.19269e-20	-0.530176	0.055	0.213	2.07185e-15	7	Syt15
Rgs10	8.84516e-20	-0.505751	0.165	0.37	2.23685e-15	7	Rgs10
Gatsl2	1.19544e-19	0.283456	0.725	0.473	3.02314e-15	7	Gatsl2
Tagln31	1.52866e-19	0.27505	0.794	0.556	3.86582e-15	7	Tagln3
Vldlr	2.03399e-19	0.317752	0.324	0.117	5.14375e-15	7	Vldlr
Kcna21	4.61535e-19	0.30155	0.892	0.703	1.16718e-14	7	Kcna2
Cpe1	8.469e-19	0.268625	0.968	0.889	2.14173e-14	7	Cpe
Pkib1	1.29023e-18	0.279014	0.494	0.254	3.26287e-14	7	Pkib
Coro2b1	1.42697e-18	0.252948	0.864	0.652	3.60866e-14	7	Coro2b
Cacna2d2	1.70552e-18	0.310123	0.894	0.718	4.31308e-14	7	Cacna2d2
Rplp11	2.06336e-18	-0.47199	0.436	0.528	5.21802e-14	7	Rplp1
Alcam	3.03471e-18	0.277949	0.812	0.59	7.67448e-14	7	Alcam
Atp1b21	3.69457e-18	0.256193	0.787	0.561	9.34321e-14	7	Atp1b2
Rpl141	5.14961e-18	-0.41156	0.634	0.721	1.30228e-13	7	Rpl14
Zcchc18	6.64737e-18	-0.263898	0.899	0.841	1.68105e-13	7	Zcchc18
Fgf131	7.31512e-18	0.300811	0.494	0.258	1.84992e-13	7	Fgf13
Bend61	8.78151e-18	0.283127	0.609	0.365	2.22076e-13	7	Bend6
Paip21	9.05843e-18	0.26576	0.865	0.668	2.29079e-13	7	Paip2
Chst21	1.07044e-17	0.275666	0.945	0.814	2.70703e-13	7	Chst2
Tgfb21	1.08524e-17	0.272361	0.636	0.393	2.74446e-13	7	Tgfb2
Gnaz1	1.20428e-17	-0.495083	0.15	0.324	3.04551e-13	7	Gnaz
Ackr1	1.23384e-17	0.325206	0.379	0.165	3.12025e-13	7	Ackr1
Scn2b1	1.55028e-17	0.300598	0.72	0.486	3.92049e-13	7	Scn2b
Rap1gap21	1.61963e-17	0.254737	0.717	0.48	4.09589e-13	7	Rap1gap2
Rps151	1.76556e-17	-0.431987	0.381	0.477	4.46492e-13	7	Rps15
Pou3f11	1.99505e-17	0.334916	0.729	0.508	5.04527e-13	7	Pou3f1
Plcxd21	2.70264e-17	0.264972	0.361	0.155	6.83472e-13	7	Plcxd2
Tbc1d9	2.72055e-17	0.310377	0.609	0.369	6.88001e-13	7	Tbc1d9
Rpl131	3.29437e-17	-0.415858	0.561	0.62	8.33112e-13	7	Rpl13
Efhd21	3.3941e-17	0.356507	0.478	0.248	8.58335e-13	7	Efhd2
Lrrc17	3.99925e-17	0.309442	0.491	0.261	1.01137e-12	7	Lrrc17
Dusp11	5.38934e-17	-0.48994	0.018	0.135	1.36291e-12	7	Dusp1
Nacc21	5.45647e-17	0.305438	0.396	0.182	1.37989e-12	7	Nacc2
Spcs2	5.89572e-17	0.32549	0.822	0.613	1.49097e-12	7	Spcs2
Atp5h	6.2488e-17	-0.443701	0.314	0.396	1.58026e-12	7	Atp5h
A730017C20Rik1	7.5398e-17	-0.473356	0.131	0.313	1.90674e-12	7	A730017C20Rik
St13	8.6714e-17	0.252077	0.722	0.492	2.19291e-12	7	St13
Gm94931	1.04433e-16	-0.49889	0.097	0.235	2.641e-12	7	Gm9493
Myt1l1	1.07903e-16	0.296487	0.696	0.462	2.72876e-12	7	Myt1l
Sostdc11	1.61676e-16	0.34033	0.557	0.325	4.08862e-12	7	Sostdc1
Arl8a	1.66426e-16	0.252554	0.859	0.663	4.20874e-12	7	Arl8a
Pxylp11	2.2908e-16	0.269469	0.507	0.28	5.7932e-12	7	Pxylp1
Extl21	2.9832e-16	0.279605	0.815	0.611	7.54422e-12	7	Extl2
Snn1	3.23648e-16	0.320485	0.453	0.232	8.18473e-12	7	Snn
Anp32a	6.41576e-16	0.251606	0.654	0.424	1.62248e-11	7	Anp32a
Atp5j	7.39182e-16	-0.268653	0.79	0.71	1.86932e-11	7	Atp5j
Tmem176a	1.176e-15	0.344204	0.542	0.318	2.97398e-11	7	Tmem176a
Golga7b	1.25589e-15	0.25626	0.594	0.366	3.17603e-11	7	Golga7b
Rnd21	1.29425e-15	0.275566	0.616	0.387	3.27303e-11	7	Rnd2
Egr11	1.3808e-15	-0.464759	0.012	0.113	3.4919e-11	7	Egr1
Ptpdc11	1.70001e-15	-0.485685	0.406	0.541	4.29916e-11	7	Ptpdc1
Stmn2	2.23015e-15	0.33323	0.755	0.549	5.63983e-11	7	Stmn2
Camk2b1	3.39846e-15	0.26692	0.864	0.693	8.59436e-11	7	Camk2b
Tpbgl1	3.89166e-15	0.266923	0.439	0.23	9.84162e-11	7	Tpbgl
X6330403K07Rik1	6.26331e-15	-0.470045	0.376	0.492	1.58393e-10	7	X6330403K07Rik
Tob11	7.08201e-15	-0.573515	0.092	0.218	1.79097e-10	7	Tob1
Mapre21	8.95396e-15	0.264263	0.854	0.696	2.26437e-10	7	Mapre2
Pnmal11	9.66044e-15	-0.450601	0.321	0.427	2.44303e-10	7	Pnmal1
Nap1l51	1.36038e-14	-0.707251	0.103	0.225	3.44028e-10	7	Nap1l5
Gpr1391	1.5453e-14	-0.355875	0.07	0.207	3.90791e-10	7	Gpr139
Ldha1	1.70459e-14	-0.49692	0.303	0.459	4.31074e-10	7	Ldha
Gm175411	1.89232e-14	-0.467392	0.343	0.423	4.78549e-10	7	Gm17541
St3gal51	1.91585e-14	0.306045	0.737	0.525	4.845e-10	7	St3gal5
Ahi11	2.00794e-14	-0.395378	0.306	0.43	5.07788e-10	7	Ahi1
Jund1	2.03538e-14	-0.368555	0.511	0.597	5.14728e-10	7	Jund
L3mbtl31	2.29417e-14	0.290183	0.22	0.07	5.80172e-10	7	L3mbtl3
Tmem47	2.32768e-14	0.271671	0.469	0.262	5.88646e-10	7	Tmem47
Ttyh3	4.88937e-14	0.260617	0.539	0.325	1.23647e-09	7	Ttyh3
Irf2bpl	1.20929e-13	-0.413337	0.481	0.531	3.05818e-09	7	Irf2bpl
Rab43	1.36385e-13	0.250188	0.29	0.121	3.44903e-09	7	Rab43
Clstn21	1.42969e-13	-0.31925	0.055	0.186	3.61555e-09	7	Clstn2
Bex21	1.69142e-13	-0.38745	0.456	0.521	4.27744e-09	7	Bex2
Nat8l	1.88305e-13	0.279325	0.228	0.079	4.76205e-09	7	Nat8l
Syt51	2.14647e-13	-0.404606	0.083	0.221	5.42822e-09	7	Syt5
Cdh131	3.40013e-13	-0.293765	0.067	0.203	8.59859e-09	7	Cdh13
Zbtb181	4.58077e-13	0.278535	0.373	0.189	1.15843e-08	7	Zbtb18
Vta11	8.64149e-13	0.261284	0.517	0.315	2.18535e-08	7	Vta1
Cacng51	1.0328e-12	0.267961	0.414	0.224	2.61184e-08	7	Cacng5
Npr1	1.07213e-12	-0.393809	0.441	0.523	2.7113e-08	7	Npr1
Rps18	1.16583e-12	-0.348539	0.418	0.47	2.94827e-08	7	Rps18
Spg21	1.20004e-12	0.281619	0.484	0.286	3.03478e-08	7	Spg21
Nefm1	1.29177e-12	0.333261	0.672	0.482	3.26676e-08	7	Nefm
Bex11	1.3078e-12	-0.417338	0.364	0.456	3.30728e-08	7	Bex1
Ier51	1.74866e-12	-0.509791	0.065	0.187	4.4222e-08	7	Ier5
Gm138891	2.63356e-12	0.271066	0.717	0.53	6.66002e-08	7	Gm13889
Caly1	2.64304e-12	-0.363641	0.423	0.527	6.68399e-08	7	Caly
Ebpl	3.45495e-12	0.298863	0.278	0.12	8.73722e-08	7	Ebpl
Rack11	9.44744e-12	-0.277839	0.546	0.597	2.38916e-07	7	Rack1
Coro7	1.12073e-11	0.266888	0.388	0.21	2.83423e-07	7	Coro7
Tnfrsf19	1.58844e-11	-0.391247	0.087	0.207	4.017e-07	7	Tnfrsf19
Hypk	1.94128e-11	-0.44868	0.286	0.356	4.90929e-07	7	Hypk
Prkch1	1.98906e-11	-0.275632	0.05	0.163	5.03013e-07	7	Prkch
Lhfpl31	2.76265e-11	0.276794	0.461	0.276	6.98647e-07	7	Lhfpl3
Cnr11	3.06636e-11	-0.40432	0.278	0.393	7.75451e-07	7	Cnr1
Celf31	3.15355e-11	-0.399373	0.409	0.5	7.975e-07	7	Celf3
Klf61	3.23232e-11	-0.458482	0.08	0.189	8.17422e-07	7	Klf6
Cytip1	4.25848e-11	-0.274992	0.03	0.127	1.07693e-06	7	Cytip
Nppa1	4.82075e-11	-0.372049	0.221	0.366	1.21912e-06	7	Nppa
Celf61	4.92243e-11	-0.382899	0.165	0.285	1.24483e-06	7	Celf6
Zfas11	6.42558e-11	-0.404387	0.343	0.403	1.62496e-06	7	Zfas1
Srebf21	1.24482e-10	-0.451061	0.285	0.383	3.14802e-06	7	Srebf2
2019-06-01	5.43925e-10	-0.396332	0.028	0.113	1.37553e-05	7	Jun
Grin3a	5.65374e-10	-0.37496	0.346	0.435	1.42977e-05	7	Grin3a
Cnih3	6.35409e-10	-0.322935	0.123	0.231	1.60688e-05	7	Cnih3
Tmsb101	7.16489e-10	-0.32373	0.175	0.283	1.81193e-05	7	Tmsb10
X2010204K13Rik1	9.58698e-10	-0.393409	0.092	0.182	2.42445e-05	7	X2010204K13Rik
Mbp	9.99232e-10	-0.977945	0.2	0.277	2.52696e-05	7	Mbp
Snrpf1	1.1331e-09	-0.36396	0.304	0.379	2.8655e-05	7	Snrpf
Pcdh91	2.69886e-09	-0.372654	0.27	0.362	6.82515e-05	7	Pcdh9
AI5044321	4.14958e-09	-0.260821	0.035	0.124	0.000104939	7	AI504432
Foxp21	8.41364e-09	-0.37007	0.178	0.272	0.000212773	7	Foxp2
Tmem1631	1.05837e-08	-0.330737	0.15	0.27	0.000267651	7	Tmem163
Rplp21	1.08291e-08	-0.301527	0.085	0.18	0.000273857	7	Rplp2
Ptprz11	1.23836e-08	-0.322125	0.115	0.207	0.000313169	7	Ptprz1
Cdh3	1.25538e-08	-0.398775	0.226	0.354	0.000317473	7	Cdh3
Mast3	2.34462e-08	-0.256506	0.035	0.111	0.000592931	7	Mast3
Rpl111	2.94145e-08	-0.29673	0.221	0.289	0.000743863	7	Rpl11
Vangl11	3.73277e-08	-0.313838	0.2	0.314	0.00094398	7	Vangl1
Rnf112	4.15083e-08	-0.32834	0.093	0.2	0.0010497	7	Rnf112
Msmo11	4.27661e-08	-0.384264	0.148	0.245	0.00108151	7	Msmo1
Hspb11	4.65575e-08	-0.306556	0.18	0.268	0.00117739	7	Hspb11
Cartpt1	5.26872e-08	-0.313574	0.048	0.125	0.00133241	7	Cartpt
Jam31	5.7808e-08	-0.359089	0.218	0.338	0.00146191	7	Jam3
Slit2	6.53085e-08	-0.323821	0.353	0.427	0.00165159	7	Slit2
Pnrc1	7.14203e-08	-0.328052	0.21	0.27	0.00180615	7	Pnrc1
Htr5b	7.60977e-08	-0.305591	0.354	0.421	0.00192444	7	Htr5b
Gm86241	8.03652e-08	-0.309373	0.131	0.223	0.00203235	7	Gm8624
Calb21	1.55454e-07	-0.369996	0.088	0.173	0.00393129	7	Calb2
Tppp31	1.73419e-07	-0.374844	0.16	0.245	0.00438559	7	Tppp3
Rpl13.ps3	3.62513e-07	-0.250911	0.105	0.199	0.00916759	7	Rpl13.ps3
Aldoc1	4.97036e-07	-0.287427	0.15	0.237	0.0125695	7	Aldoc
Sox51	8.54665e-07	-0.317225	0.17	0.256	0.0216136	7	Sox5
St51	9.79124e-07	-0.283155	0.146	0.199	0.0247611	7	St5
Syt17	1.6673e-06	-0.280203	0.278	0.397	0.0421643	7	Syt17
Ipo7	2.44997e-06	0.264623	0.444	0.308	0.0619573	7	Ipo7
Abl2	2.49973e-06	-0.270555	0.171	0.239	0.0632157	7	Abl2
Nhlh21	2.94045e-06	-0.275847	0.394	0.449	0.0743609	7	Nhlh2
Stmn41	3.00753e-06	-0.284724	0.063	0.12	0.0760575	7	Stmn4
Gm37214	3.71406e-06	-0.327574	0.135	0.194	0.0939249	7	Gm37214
Tma16	3.80926e-06	-0.262322	0.146	0.223	0.0963323	7	Tma16
Plk2	9.41047e-06	-0.257728	0.256	0.321	0.237981	7	Plk2
Tacr1	1.44719e-05	-0.288539	0.28	0.358	0.36598	7	Tacr1
Gna13	1.64053e-05	-0.271115	0.151	0.217	0.414874	7	Gna13
Idi11	2.03497e-05	-0.252187	0.165	0.223	0.514624	7	Idi1
Bex41	2.22154e-05	-0.287764	0.268	0.33	0.561806	7	Bex4
Mpped11	3.1271e-05	-0.256119	0.045	0.11	0.790812	7	Mpped1
Plp1	5.36499e-05	-0.317519	0.203	0.261	1	7	Plp1
Phf241	7.09507e-05	-0.258365	0.163	0.225	1	7	Phf24
Irf2bp2	7.28789e-05	-0.272539	0.13	0.187	1	7	Irf2bp2
Fam19a2	7.31822e-05	-0.253924	0.1	0.172	1	7	Fam19a2
Siah2	0.000175846	-0.250391	0.065	0.118	1	7	Siah2
Ndrg21	0.000219439	-0.29137	0.093	0.144	1	7	Ndrg2
X6330403A02Rik1	3.57656e-297	-2.1659	0.034	0.784	9.04475e-293	8	X6330403A02Rik
Cck1	7.28417e-261	-2.13451	0.101	0.797	1.84209e-256	8	Cck
Gpr1512	9.38712e-256	1.37796	0.952	0.48	2.37391e-251	8	Gpr151
Nr4a21	1.24861e-223	1.34551	0.916	0.474	3.15762e-219	8	Nr4a2
Adcyap11	7.00609e-217	-1.78645	0.038	0.675	1.77177e-212	8	Adcyap1
Kcnmb42	1.37953e-205	1.51283	0.826	0.213	3.48869e-201	8	Kcnmb4
Tmsb4x	2.1076e-189	1.15787	0.951	0.698	5.3299e-185	8	Tmsb4x
Ctnnbip11	5.05083e-184	1.26563	0.909	0.567	1.2773e-179	8	Ctnnbip1
Etv11	1.88885e-183	1.44212	0.651	0.061	4.77672e-179	8	Etv1
Amigo22	1.89345e-183	1.29213	0.883	0.4	4.78836e-179	8	Amigo2
Syt152	2.81944e-172	1.40617	0.638	0.066	7.13009e-168	8	Syt15
Plch21	1.4869e-156	1.32773	0.556	0.038	3.76023e-152	8	Plch2
Gabbr21	1.39409e-149	1.17157	0.821	0.419	3.52553e-145	8	Gabbr2
Foxp22	1.03774e-147	1.29192	0.581	0.073	2.62435e-143	8	Foxp2
Nnat2	7.43751e-146	0.936974	0.938	0.631	1.88087e-141	8	Nnat
Npr11	1.09203e-142	1.15603	0.69	0.159	2.76164e-138	8	Npr1
Nrgn1	1.19613e-139	1.86903	0.521	0.049	3.0249e-135	8	Nrgn
Tac2	2.32682e-134	-0.906072	0.755	0.937	5.88431e-130	8	Tac2
Tmeff2	2.35492e-133	1.15057	0.594	0.09	5.95535e-129	8	Tmeff2
Tspan13	1.17952e-125	0.609834	0.976	0.924	2.98289e-121	8	Tspan13
Wfikkn2	3.2031e-122	1.19232	0.569	0.091	8.10032e-118	8	Wfikkn2
Cdh31	7.37531e-118	1.06218	0.487	0.045	1.86514e-113	8	Cdh3
Spon11	3.70997e-110	1.03959	0.495	0.062	9.38214e-106	8	Spon1
Pde11a1	2.32258e-104	-1.27943	0.02	0.384	5.87357e-100	8	Pde11a
Chst11	4.24532e-102	0.934543	0.755	0.325	1.0736e-97	8	Chst1
Chrna31	5.60128e-100	0.980649	0.638	0.197	1.41651e-95	8	Chrna3
Calb22	5.57778e-99	-0.666873	0.831	0.948	1.41056e-94	8	Calb2
Prkcq1	1.33772e-98	1.009	0.67	0.234	3.38296e-94	8	Prkcq
Syt7	7.79863e-96	-1.00695	0.211	0.627	1.9722e-91	8	Syt7
Slc12a51	8.06146e-91	-0.986799	0.122	0.538	2.03866e-86	8	Slc12a5
Prkar2a1	6.20297e-89	0.937419	0.759	0.473	1.56867e-84	8	Prkar2a
Olfm3	6.28462e-88	-1.05627	0.151	0.559	1.58932e-83	8	Olfm3
Ptgds1	1.39135e-85	-0.963499	0.032	0.362	3.5186e-81	8	Ptgds
Chrnb41	2.47873e-83	0.923553	0.71	0.327	6.26845e-79	8	Chrnb4
Htr5b1	6.54894e-83	0.860891	0.588	0.187	1.65616e-78	8	Htr5b
Wif11	4.30239e-82	-1.09938	0.19	0.578	1.08803e-77	8	Wif1
Nppa2	1.292e-80	0.843271	0.559	0.155	3.26735e-76	8	Nppa
Vat1l	6.74805e-80	0.630579	0.9	0.76	1.70651e-75	8	Vat1l
Snap252	5.57965e-79	-0.652037	0.793	0.891	1.41104e-74	8	Snap25
Pde2a1	6.37482e-78	0.79203	0.819	0.602	1.61213e-73	8	Pde2a
Nap1l52	3.36657e-75	0.979257	0.571	0.171	8.51371e-71	8	Nap1l5
Kcng42	8.6872e-75	-0.743074	0.562	0.782	2.19691e-70	8	Kcng4
Ubl3	2.69459e-70	0.611753	0.879	0.741	6.81435e-66	8	Ubl3
Snca1	3.25936e-67	0.797264	0.693	0.342	8.2426e-63	8	Snca
Vangl12	2.07663e-66	0.820971	0.527	0.173	5.2516e-62	8	Vangl1
Kcnmb4os21	3.45275e-66	0.661494	0.306	0.028	8.73167e-62	8	Kcnmb4os2
Tac11	8.09678e-64	-0.891769	0.345	0.7	2.0476e-59	8	Tac1
Grm5	9.89527e-64	-0.746326	0.019	0.271	2.50241e-59	8	Grm5
Celf4	1.88191e-63	-0.517635	0.853	0.915	4.75915e-59	8	Celf4
Syt131	7.84888e-62	-0.643182	0.669	0.823	1.9849e-57	8	Syt13
Avil1	9.47107e-60	-0.655754	0.008	0.227	2.39514e-55	8	Avil
Ndst1	3.10667e-59	0.80586	0.603	0.262	7.85645e-55	8	Ndst1
Alcam1	1.03744e-58	-0.718175	0.414	0.705	2.62358e-54	8	Alcam
Vav31	2.43366e-58	0.692437	0.708	0.415	6.15447e-54	8	Vav3
Lin7a1	3.81032e-58	-0.572876	0.012	0.233	9.63591e-54	8	Lin7a
Fgf12	1.30571e-57	-0.827683	0.025	0.257	3.30202e-53	8	Fgf1
Rspo3	1.58333e-57	-0.693304	0.098	0.41	4.00409e-53	8	Rspo3
Rasd21	2.18681e-56	-0.649723	0.055	0.33	5.53022e-52	8	Rasd2
Slit21	2.57413e-56	0.710543	0.601	0.272	6.50972e-52	8	Slit2
Atp1b22	1.11526e-55	-0.806123	0.261	0.562	2.82038e-51	8	Atp1b2
Fxyd7	2.98276e-55	-0.692113	0.02	0.249	7.5431e-51	8	Fxyd7
Nr4a31	4.50321e-55	-0.546577	0.072	0.358	1.13882e-50	8	Nr4a3
Wbscr17	4.69854e-55	-0.673707	0.024	0.256	1.18821e-50	8	Wbscr17
Kitl1	1.7675e-54	0.737379	0.373	0.085	4.46982e-50	8	Kitl
Marcksl11	3.5072e-54	-0.654123	0.417	0.733	8.86935e-50	8	Marcksl1
Atp1a11	5.60399e-54	-0.700592	0.686	0.816	1.41719e-49	8	Atp1a1
Syt171	1.11384e-53	0.73577	0.47	0.16	2.8168e-49	8	Syt17
Wls	1.40733e-53	-0.738896	0.318	0.618	3.55901e-49	8	Wls
Ints3	3.39982e-53	0.675396	0.687	0.412	8.5978e-49	8	Ints3
Tacr11	4.66659e-53	0.600812	0.342	0.067	1.18013e-48	8	Tacr1
Tmem1581	2.81108e-52	-0.762357	0.244	0.554	7.10895e-48	8	Tmem158
Sncg1	3.85278e-52	-0.671632	0.558	0.791	9.7433e-48	8	Sncg
Cadm12	6.43131e-52	0.553245	0.853	0.595	1.62641e-47	8	Cadm1
Wfdc11	2.83292e-51	-0.738714	0.096	0.371	7.16418e-47	8	Wfdc1
Gucy1a3	3.35083e-47	-0.522694	0.658	0.815	8.4739e-43	8	Gucy1a3
Gfra2	8.22784e-47	-0.461047	0.01	0.194	2.08074e-42	8	Gfra2
Scd21	1.10268e-46	-0.703467	0.243	0.543	2.78857e-42	8	Scd2
Chrna4	3.36839e-46	0.55624	0.263	0.039	8.51833e-42	8	Chrna4
Ncam11	9.11036e-46	-0.63562	0.48	0.704	2.30392e-41	8	Ncam1
Hpcal1	5.10852e-45	-0.707647	0.256	0.52	1.29189e-40	8	Hpcal1
Scrn1	7.8999e-45	0.558187	0.794	0.623	1.99781e-40	8	Scrn1
Chchd10	2.29892e-44	0.542852	0.762	0.551	5.81374e-40	8	Chchd10
Negr11	2.53258e-44	0.66425	0.548	0.248	6.40464e-40	8	Negr1
Islr21	1.74353e-43	-0.539822	0.029	0.232	4.40922e-39	8	Islr2
Sema3d1	5.83076e-43	0.61909	0.274	0.048	1.47454e-38	8	Sema3d
Tox1	8.33924e-43	0.539427	0.249	0.037	2.10891e-38	8	Tox
L1cam1	1.37559e-42	-0.544903	0.118	0.375	3.47873e-38	8	L1cam
Cadm22	1.82453e-42	-0.740478	0.339	0.565	4.61407e-38	8	Cadm2
Pygm1	1.98832e-42	-0.537888	0.016	0.192	5.02826e-38	8	Pygm
Camkv	2.54332e-42	-0.572973	0.082	0.322	6.4318e-38	8	Camkv
Ap1s21	3.93448e-42	-0.646169	0.089	0.329	9.9499e-38	8	Ap1s2
Hopx2	9.31156e-42	0.532429	0.812	0.629	2.3548e-37	8	Hopx
Sncb	1.95229e-41	-0.533694	0.607	0.761	4.93714e-37	8	Sncb
Rspo42	4.51766e-41	0.621672	0.441	0.163	1.14247e-36	8	Rspo4
Nefl	4.92887e-41	-0.640125	0.232	0.506	1.24646e-36	8	Nefl
Rasl10b	8.33846e-40	0.595672	0.542	0.287	2.10871e-35	8	Rasl10b
Gng21	1.232e-39	-0.591353	0.115	0.36	3.11559e-35	8	Gng2
Olfm1	2.88521e-39	0.392394	0.914	0.823	7.29641e-35	8	Olfm1
Gnb21	3.23117e-39	-0.604403	0.26	0.54	8.1713e-35	8	Gnb2
Cntnap2	4.15777e-39	-0.422156	0.774	0.862	1.05146e-34	8	Cntnap2
Wscd1	5.02417e-39	0.464	0.229	0.033	1.27056e-34	8	Wscd1
Fabp51	6.44499e-39	-0.708533	0.093	0.322	1.62987e-34	8	Fabp5
Grin3a1	1.88715e-38	0.541987	0.549	0.263	4.77241e-34	8	Grin3a
Lhx91	2.16402e-38	0.534841	0.738	0.544	5.47258e-34	8	Lhx9
Gm138892	3.14986e-38	0.544517	0.261	0.051	7.96568e-34	8	Gm13889
Tnfrsf191	3.16867e-38	0.503946	0.329	0.09	8.01326e-34	8	Tnfrsf19
Sptb	6.92691e-38	0.510964	0.362	0.114	1.75175e-33	8	Sptb
Pbx1	1.71627e-36	0.347615	0.939	0.844	4.34028e-32	8	Pbx1
Prkch2	5.5967e-36	0.444406	0.304	0.08	1.41535e-31	8	Prkch
Tbc1d4	7.74624e-36	0.526541	0.273	0.068	1.95895e-31	8	Tbc1d4
Fam163a	9.70932e-36	-0.383082	0.011	0.16	2.45539e-31	8	Fam163a
Ptpdc12	2.38483e-35	0.477951	0.678	0.403	6.03099e-31	8	Ptpdc1
Tmem471	3.20397e-35	-0.697166	0.133	0.369	8.10253e-31	8	Tmem47
Stt3b	1.28322e-34	-0.563241	0.335	0.578	3.24514e-30	8	Stt3b
Mapt1	2.12494e-34	-0.472888	0.637	0.788	5.37376e-30	8	Mapt
Camk2n1	4.24509e-34	-0.507601	0.514	0.711	1.07354e-29	8	Camk2n1
Gabra21	4.79327e-34	0.402902	0.835	0.601	1.21217e-29	8	Gabra2
Amph1	6.84495e-34	0.490978	0.691	0.439	1.73102e-29	8	Amph
Nfib2	1.49138e-33	-0.622363	0.055	0.242	3.77156e-29	8	Nfib
Cytip2	2.06385e-33	0.508943	0.519	0.249	5.21928e-29	8	Cytip
Pbx31	5.15946e-33	0.532422	0.717	0.492	1.30478e-28	8	Pbx3
A830010M20Rik1	5.91996e-33	0.508264	0.375	0.142	1.4971e-28	8	A830010M20Rik
Slc2a131	8.14125e-33	-0.500608	0.521	0.711	2.05884e-28	8	Slc2a13
Slc18a32	8.46878e-33	0.313605	0.141	0.008	2.14167e-28	8	Slc18a3
Pcp4l12	1.29345e-32	-0.581736	0.022	0.177	3.271e-28	8	Pcp4l1
Nefm2	1.40075e-32	-0.56592	0.19	0.426	3.54235e-28	8	Nefm
Cntnap1	1.59127e-32	-0.376512	0.041	0.219	4.02417e-28	8	Cntnap1
Cplx2	3.07826e-32	-0.683119	0.13	0.339	7.78461e-28	8	Cplx2
Cnih31	4.21184e-32	0.501411	0.352	0.126	1.06513e-27	8	Cnih3
Rasgrp2	4.59155e-32	-0.342613	0.021	0.175	1.16116e-27	8	Rasgrp2
Slc24a3	5.12858e-32	0.37983	0.206	0.034	1.29697e-27	8	Slc24a3
Rgs4	1.07242e-31	0.49552	0.526	0.261	2.71205e-27	8	Rgs4
Col16a11	1.23312e-31	-0.47648	0.166	0.41	3.11845e-27	8	Col16a1
Gabrg2	1.57325e-31	-0.516915	0.203	0.439	3.97859e-27	8	Gabrg2
Robo2	3.68942e-31	-0.355139	0.016	0.159	9.33018e-27	8	Robo2
Rasgrf1	3.8624e-31	-0.574687	0.037	0.195	9.76763e-27	8	Rasgrf1
Nsf2	5.44092e-31	-0.511815	0.517	0.69	1.37596e-26	8	Nsf
Pou6f21	5.78059e-31	-0.519973	0.125	0.346	1.46185e-26	8	Pou6f2
Nxph4	6.53556e-31	0.373743	0.166	0.019	1.65278e-26	8	Nxph4
Dap	8.49866e-31	0.519299	0.43	0.202	2.14923e-26	8	Dap
Gabra1	1.14144e-30	-0.298874	0.005	0.124	2.88658e-26	8	Gabra1
Gnb41	2.45177e-30	0.443994	0.401	0.163	6.20028e-26	8	Gnb4
Rimbp2	2.70095e-30	0.531014	0.419	0.187	6.83044e-26	8	Rimbp2
Pea15a	9.63788e-30	-0.585908	0.266	0.486	2.43732e-25	8	Pea15a
Col8a21	1.20329e-29	0.422367	0.239	0.057	3.04299e-25	8	Col8a2
Dok5	1.28062e-29	-0.272014	0.005	0.12	3.23857e-25	8	Dok5
Nfam11	1.34214e-29	0.319087	0.119	0.004	3.39414e-25	8	Nfam1
Cpne42	1.50551e-29	-0.568484	0.388	0.559	3.80729e-25	8	Cpne4
Nt5dc31	1.74388e-29	0.497466	0.418	0.188	4.41009e-25	8	Nt5dc3
Hspb6	2.66194e-29	-0.564826	0.037	0.191	6.73179e-25	8	Hspb6
Otx1	3.4701e-29	-0.385608	0.022	0.167	8.77554e-25	8	Otx1
Klhl1	1.10864e-28	0.531623	0.449	0.229	2.80365e-24	8	Klhl1
Cox6b2	1.13954e-28	-0.346308	0.015	0.147	2.88178e-24	8	Cox6b2
Syt6	1.77446e-28	-0.439991	0.688	0.791	4.48742e-24	8	Syt6
Ctnnb11	2.25234e-28	0.353388	0.874	0.809	5.69594e-24	8	Ctnnb1
Nfix1	3.95685e-28	-0.466882	0.039	0.196	1.00065e-23	8	Nfix
Trpc4	1.18128e-27	0.413908	0.292	0.095	2.98735e-23	8	Trpc4
Nedd4l	3.66301e-27	0.479968	0.499	0.263	9.26338e-23	8	Nedd4l
Hhip1	1.18163e-26	0.513219	0.694	0.515	2.98822e-22	8	Hhip
Homer2	2.8949e-26	-0.424733	0.06	0.23	7.32091e-22	8	Homer2
Tmem178b	2.98534e-26	0.473046	0.522	0.29	7.54963e-22	8	Tmem178b
AW551984	5.45447e-26	-0.373566	0.029	0.169	1.37938e-21	8	AW551984
Tenm11	7.55229e-26	0.399926	0.182	0.035	1.9099e-21	8	Tenm1
Kank4	8.88518e-26	-0.412905	0.03	0.17	2.24697e-21	8	Kank4
Cds2	1.57216e-25	0.321769	0.893	0.834	3.97584e-21	8	Cds2
Stard10	1.79178e-25	-0.475527	0.142	0.344	4.53124e-21	8	Stard10
X1190002N15Rik1	1.86276e-25	-0.508065	0.129	0.327	4.71073e-21	8	X1190002N15Rik
Nptx11	2.09723e-25	-0.441424	0.444	0.627	5.30369e-21	8	Nptx1
Tub1	2.21947e-25	0.418622	0.645	0.444	5.61281e-21	8	Tub
Brinp11	2.30773e-25	-0.469777	0.131	0.328	5.83602e-21	8	Brinp1
Rprm1	2.36443e-25	0.49713	0.617	0.391	5.97942e-21	8	Rprm
Clic5	3.5931e-25	0.40133	0.199	0.045	9.08658e-21	8	Clic5
Clmp	3.61938e-25	-0.321766	0.012	0.127	9.15306e-21	8	Clmp
Nek7	4.30546e-25	0.364992	0.847	0.681	1.08881e-20	8	Nek7
Mapk8ip2	4.61752e-25	0.360554	0.838	0.734	1.16773e-20	8	Mapk8ip2
Plscr4	4.67017e-25	0.29688	0.124	0.011	1.18104e-20	8	Plscr4
Ntrk2	6.75845e-25	-0.328445	0.027	0.16	1.70914e-20	8	Ntrk2
Prkcb2	9.03818e-25	-0.558974	0.204	0.396	2.28567e-20	8	Prkcb
Pkia2	1.2114e-24	-0.483399	0.334	0.533	3.06351e-20	8	Pkia
Prkd1	1.36537e-24	0.348617	0.248	0.075	3.45288e-20	8	Prkd1
Grsf1	2.12649e-24	0.456158	0.605	0.402	5.37768e-20	8	Grsf1
Cav2	3.28177e-24	0.31441	0.151	0.024	8.29927e-20	8	Cav2
Ptprm	3.71538e-24	-0.441331	0.027	0.156	9.39581e-20	8	Ptprm
Zic3	9.25158e-24	-0.430286	0.074	0.24	2.33963e-19	8	Zic3
Th	1.00655e-23	0.403945	0.183	0.041	2.54547e-19	8	Th
Mgll1	1.30348e-23	0.501142	0.449	0.258	3.29637e-19	8	Mgll
Gnaz2	1.37561e-23	0.429099	0.564	0.363	3.47879e-19	8	Gnaz
Otx2	1.58584e-23	-0.467929	0.124	0.312	4.01043e-19	8	Otx2
Adgrb21	1.86414e-23	-0.349636	0.072	0.237	4.71423e-19	8	Adgrb2
Rgs101	1.91494e-23	0.432465	0.362	0.163	4.84268e-19	8	Rgs10
Dpp101	2.70499e-23	0.424908	0.699	0.518	6.84065e-19	8	Dpp10
Lmo4	2.83511e-23	-0.331015	0.014	0.125	7.16972e-19	8	Lmo4
Ephb1	3.61952e-23	-0.388391	0.085	0.254	9.15342e-19	8	Ephb1
Trp53i111	3.67589e-23	0.340866	0.737	0.525	9.29595e-19	8	Trp53i11
Cotl1	4.07776e-23	0.473161	0.462	0.253	1.03123e-18	8	Cotl1
Enox2	4.17574e-23	0.475466	0.401	0.198	1.056e-18	8	Enox2
Lsamp1	4.67407e-23	0.455481	0.612	0.42	1.18202e-18	8	Lsamp
Rhoq	5.38773e-23	-0.546218	0.171	0.355	1.3625e-18	8	Rhoq
Klhl29	5.92161e-23	-0.393694	0.032	0.161	1.49752e-18	8	Klhl29
Garnl32	7.38316e-23	-0.467496	0.173	0.366	1.86713e-18	8	Garnl3
Itga9	9.26585e-23	0.254041	0.12	0.013	2.34324e-18	8	Itga9
Fam49a	1.62748e-22	-0.34933	0.028	0.153	4.11574e-18	8	Fam49a
X4930447F24Rik	1.9916e-22	0.311379	0.14	0.022	5.03655e-18	8	X4930447F24Rik
Gng3	2.113e-22	-0.452993	0.526	0.685	5.34357e-18	8	Gng3
Gfra11	2.47621e-22	0.368204	0.797	0.689	6.26208e-18	8	Gfra1
Efnb32	3.17454e-22	0.425658	0.634	0.454	8.0281e-18	8	Efnb3
Dixdc1	4.04394e-22	0.428408	0.333	0.147	1.02267e-17	8	Dixdc1
Slc5a72	4.87376e-22	0.417968	0.302	0.12	1.23253e-17	8	Slc5a7
Arhgap26	4.96745e-22	-0.441412	0.134	0.315	1.25622e-17	8	Arhgap26
Tmem176b1	5.86688e-22	-0.396287	0.525	0.684	1.48367e-17	8	Tmem176b
Pou4f1	6.51061e-22	-0.378988	0.701	0.777	1.64647e-17	8	Pou4f1
Shroom3	9.18708e-22	0.343505	0.191	0.049	2.32332e-17	8	Shroom3
Kif5c	9.33233e-22	-0.471438	0.306	0.498	2.36005e-17	8	Kif5c
Lrfn5	1.73717e-21	-0.404946	0.088	0.252	4.39313e-17	8	Lrfn5
Brinp3	1.99459e-21	-0.281198	0.015	0.119	5.04413e-17	8	Brinp3
Eno3	2.01005e-21	0.352592	0.243	0.082	5.08322e-17	8	Eno3
Chgb1	2.14217e-21	0.412351	0.64	0.459	5.41734e-17	8	Chgb
Tmcc31	2.86746e-21	0.381428	0.349	0.158	7.25152e-17	8	Tmcc3
Kcnd3	3.55919e-21	0.298619	0.53	0.312	9.00082e-17	8	Kcnd3
Sort1	4.32804e-21	0.394981	0.458	0.253	1.09452e-16	8	Sort1
Lcorl	5.09337e-21	0.430866	0.459	0.258	1.28806e-16	8	Lcorl
Fstl5	5.73665e-21	0.381441	0.349	0.158	1.45074e-16	8	Fstl5
Caly2	5.88084e-21	0.292051	0.706	0.497	1.4872e-16	8	Caly
Gpr158	6.10525e-21	0.360914	0.206	0.06	1.54396e-16	8	Gpr158
Gpr41	7.25225e-21	0.337188	0.131	0.02	1.83402e-16	8	Gpr4
Kcnab2	9.65362e-21	-0.309331	0.04	0.17	2.4413e-16	8	Kcnab2
Lgr4	1.10522e-20	0.383393	0.222	0.07	2.79499e-16	8	Lgr4
Plk5	1.30304e-20	-0.266421	0.021	0.132	3.29525e-16	8	Plk5
Gucy1b31	1.39489e-20	-0.391262	0.512	0.669	3.52752e-16	8	Gucy1b3
Igfbp5	1.5156e-20	0.357925	0.225	0.075	3.83281e-16	8	Igfbp5
Lhfp1	1.79766e-20	0.281223	0.139	0.025	4.54611e-16	8	Lhfp
Cdh8	2.04199e-20	-0.401605	0.115	0.283	5.16398e-16	8	Cdh8
Map3k61	2.88144e-20	0.376741	0.275	0.109	7.28687e-16	8	Map3k6
Ache	3.00636e-20	-0.402606	0.182	0.362	7.60278e-16	8	Ache
Epha4	3.76209e-20	-0.321851	0.011	0.104	9.51395e-16	8	Epha4
Trank1	3.77802e-20	-0.358916	0.074	0.218	9.55423e-16	8	Trank1
Pacsin1	4.25413e-20	-0.400352	0.434	0.598	1.07583e-15	8	Pacsin1
Calm1	4.40567e-20	0.319398	0.827	0.738	1.11415e-15	8	Calm1
AF5291691	4.81598e-20	0.418095	0.428	0.241	1.21791e-15	8	AF529169
Cygb	5.14027e-20	-0.329816	0.793	0.857	1.29992e-15	8	Cygb
Kcna4	9.76336e-20	-0.261524	0.012	0.105	2.46906e-15	8	Kcna4
Gdpd51	1.54799e-19	0.427299	0.253	0.096	3.9147e-15	8	Gdpd5
Magi11	1.93055e-19	0.459585	0.42	0.241	4.88216e-15	8	Magi1
X1810041L15Rik1	2.34101e-19	0.316795	0.787	0.611	5.92018e-15	8	X1810041L15Rik
Cmbl1	2.49818e-19	0.330457	0.27	0.106	6.31764e-15	8	Cmbl
Galnt14	3.19384e-19	-0.291152	0.052	0.185	8.0769e-15	8	Galnt14
Mt11	3.29478e-19	0.335906	0.373	0.185	8.33218e-15	8	Mt1
Slc7a81	3.84169e-19	-0.362787	0.146	0.318	9.71526e-15	8	Slc7a8
Eif4g3	4.48086e-19	0.380085	0.68	0.513	1.13317e-14	8	Eif4g3
Macrod2	4.81887e-19	0.422572	0.373	0.188	1.21864e-14	8	Macrod2
Fzd71	4.90303e-19	0.302554	0.156	0.037	1.23993e-14	8	Fzd7
Nkain21	5.80659e-19	0.357979	0.258	0.1	1.46843e-14	8	Nkain2
Lrrn1	6.20984e-19	-0.295738	0.031	0.142	1.57041e-14	8	Lrrn1
Cds1	6.38279e-19	0.417135	0.296	0.131	1.61414e-14	8	Cds1
Lrrtm1	7.01271e-19	0.291748	0.154	0.035	1.77345e-14	8	Lrrtm1
Pcdh191	7.35653e-19	0.31232	0.202	0.063	1.86039e-14	8	Pcdh19
Parm11	8.44327e-19	0.320528	0.317	0.143	2.13522e-14	8	Parm1
Lrrtm3	9.76454e-19	-0.314352	0.027	0.135	2.46935e-14	8	Lrrtm3
Sema3e	1.18264e-18	0.366293	0.488	0.29	2.99077e-14	8	Sema3e
Cntnap4	1.34887e-18	-0.460956	0.242	0.399	3.41116e-14	8	Cntnap4
Dad1	1.43991e-18	0.418159	0.495	0.32	3.64138e-14	8	Dad1
Gas51	1.67996e-18	-0.330261	0.717	0.8	4.24845e-14	8	Gas5
Hlf	2.12113e-18	-0.354951	0.036	0.147	5.36412e-14	8	Hlf
Epha72	2.16154e-18	-0.429878	0.24	0.417	5.46633e-14	8	Epha7
Efna3	2.24123e-18	-0.262963	0.02	0.116	5.66784e-14	8	Efna3
Jakmip2	3.61411e-18	0.385438	0.618	0.47	9.13971e-14	8	Jakmip2
Nhlh22	3.91018e-18	-0.389147	0.55	0.696	9.88846e-14	8	Nhlh2
Kcnc4	4.11881e-18	0.29006	0.127	0.024	1.04161e-13	8	Kcnc4
Myo1b1	4.41717e-18	-0.416783	0.076	0.217	1.11706e-13	8	Myo1b
Slc16a11	4.75474e-18	-0.25686	0.034	0.146	1.20243e-13	8	Slc16a11
Lgi1	7.95614e-18	-0.300357	0.062	0.195	2.01203e-13	8	Lgi1
Tmem200a	8.65796e-18	0.27612	0.141	0.031	2.18951e-13	8	Tmem200a
Megf11	9.31023e-18	-0.392298	0.03	0.132	2.35446e-13	8	Megf11
Slc8a2	9.51576e-18	-0.405153	0.099	0.247	2.40644e-13	8	Slc8a2
Clstn22	1.45429e-17	0.27936	0.35	0.174	3.67776e-13	8	Clstn2
Kctd12b1	1.61784e-17	0.310927	0.146	0.037	4.09136e-13	8	Kctd12b
Snhg4	1.69268e-17	-0.337723	0.041	0.155	4.28062e-13	8	Snhg4
Sh3bp1	2.2106e-17	-0.35648	0.627	0.734	5.59038e-13	8	Sh3bp1
Scube11	2.76847e-17	0.388296	0.502	0.324	7.00117e-13	8	Scube1
Samd111	4.82113e-17	-0.344321	0.088	0.229	1.21922e-12	8	Samd11
Lmo1	6.72549e-17	0.351555	0.198	0.069	1.70081e-12	8	Lmo1
Resp181	7.38851e-17	-0.433714	0.624	0.692	1.86848e-12	8	Resp18
B3gat11	7.94075e-17	0.288435	0.758	0.633	2.00814e-12	8	B3gat1
Sox41	1.01238e-16	-0.404223	0.284	0.455	2.5602e-12	8	Sox4
Pcyt1a	1.03704e-16	0.337727	0.247	0.104	2.62257e-12	8	Pcyt1a
Erich3	1.08991e-16	0.300019	0.172	0.052	2.75627e-12	8	Erich3
Slc6a71	2.07681e-16	0.350497	0.266	0.115	5.25205e-12	8	Slc6a7
Ephx4	2.17132e-16	0.261637	0.139	0.033	5.49104e-12	8	Ephx4
Lpar11	2.24865e-16	0.282387	0.259	0.11	5.68661e-12	8	Lpar1
Cabp7	2.68521e-16	-0.300959	0.05	0.167	6.79062e-12	8	Cabp7
Opcml1	3.40718e-16	-0.388175	0.517	0.672	8.61642e-12	8	Opcml
Adgrl3	3.46081e-16	-0.36502	0.089	0.223	8.75205e-12	8	Adgrl3
Hnmt	3.55378e-16	-0.254164	0.04	0.149	8.98715e-12	8	Hnmt
Bsn	5.08439e-16	0.341498	0.408	0.234	1.28579e-11	8	Bsn
Fibcd11	7.35335e-16	-0.499049	0.268	0.413	1.85959e-11	8	Fibcd1
Gria4	9.83009e-16	-0.377411	0.201	0.367	2.48593e-11	8	Gria4
Gchfr	1.05033e-15	0.278235	0.192	0.067	2.65617e-11	8	Gchfr
Cldnd1	1.27648e-15	0.360566	0.543	0.37	3.22809e-11	8	Cldnd1
Tubb51	1.67324e-15	-0.351698	0.55	0.678	4.23147e-11	8	Tubb5
Ncs1	2.18421e-15	0.335975	0.478	0.308	5.52366e-11	8	Ncs1
Dynlt3	2.34309e-15	0.421359	0.454	0.299	5.92543e-11	8	Dynlt3
Mgat4a	2.51227e-15	0.343968	0.252	0.112	6.35329e-11	8	Mgat4a
Fry1	2.57837e-15	0.376875	0.583	0.431	6.52044e-11	8	Fry
Slitrk4	3.88274e-15	-0.298826	0.073	0.198	9.81906e-11	8	Slitrk4
Tmem1632	4.26826e-15	-0.354941	0.351	0.523	1.0794e-10	8	Tmem163
Kremen1	4.81033e-15	0.293452	0.155	0.047	1.21648e-10	8	Kremen1
Ccdc1411	5.08441e-15	-0.375789	0.404	0.555	1.2858e-10	8	Ccdc141
Fam171b	6.17056e-15	-0.33253	0.592	0.699	1.56047e-10	8	Fam171b
Gm57411	6.55104e-15	0.409035	0.548	0.385	1.65669e-10	8	Gm5741
Asb1	6.5696e-15	0.377039	0.334	0.176	1.66139e-10	8	Asb1
Eno1	6.77443e-15	0.3321	0.542	0.382	1.71318e-10	8	Eno1
Plxnc11	7.97487e-15	0.302677	0.738	0.61	2.01677e-10	8	Plxnc1
Acsl1	8.12849e-15	-0.381356	0.12	0.256	2.05562e-10	8	Acsl1
Sema5a2	9.87811e-15	0.289649	0.134	0.035	2.49808e-10	8	Sema5a
Rcn11	1.06975e-14	-0.342354	0.137	0.282	2.70529e-10	8	Rcn1
Chrnb32	1.22989e-14	-0.288521	0.028	0.118	3.11027e-10	8	Chrnb3
Celf21	2.19666e-14	-0.335595	0.692	0.773	5.55515e-10	8	Celf2
Stmn21	3.03958e-14	-0.345975	0.613	0.724	7.68679e-10	8	Stmn2
Robo31	3.10092e-14	0.333567	0.306	0.159	7.84192e-10	8	Robo3
Tuba1b1	3.12194e-14	-0.284543	0.73	0.799	7.89508e-10	8	Tuba1b
Bmyc	3.22356e-14	-0.266436	0.039	0.138	8.15205e-10	8	Bmyc
Fxyd61	3.5339e-14	-0.432226	0.112	0.246	8.93688e-10	8	Fxyd6
Plppr11	3.86695e-14	-0.341931	0.2	0.357	9.77912e-10	8	Plppr1
Stmn42	3.98923e-14	-0.342678	0.23	0.389	1.00884e-09	8	Stmn4
Rgs7bp	4.04462e-14	0.257508	0.169	0.057	1.02284e-09	8	Rgs7bp
Slc7a1	4.35675e-14	0.353902	0.296	0.151	1.10178e-09	8	Slc7a1
Lhx2	4.44178e-14	0.272709	0.147	0.044	1.12328e-09	8	Lhx2
Syne12	4.52957e-14	0.382901	0.6	0.469	1.14548e-09	8	Syne1
Runx1t1	5.3834e-14	-0.276201	0.04	0.139	1.36141e-09	8	Runx1t1
Pld52	6.80934e-14	-0.413108	0.188	0.33	1.72201e-09	8	Pld5
Slc6a17	6.90365e-14	0.320864	0.454	0.292	1.74586e-09	8	Slc6a17
Inpp4b	8.93169e-14	0.313473	0.274	0.132	2.25874e-09	8	Inpp4b
Lipa	9.38587e-14	-0.319896	0.098	0.226	2.37359e-09	8	Lipa
Chmp4b1	1.3328e-13	0.278345	0.807	0.72	3.37051e-09	8	Chmp4b
Plekha2	1.64298e-13	-0.250711	0.024	0.106	4.15494e-09	8	Plekha2
Nrep	2.16411e-13	-0.303596	0.125	0.261	5.47282e-09	8	Nrep
Phactr2	2.19822e-13	-0.287301	0.053	0.158	5.55908e-09	8	Phactr2
Phyhipl	2.44044e-13	-0.332524	0.288	0.448	6.17162e-09	8	Phyhipl
Igsf8	3.27286e-13	-0.331643	0.16	0.302	8.27674e-09	8	Igsf8
X2810403D21Rik1	3.33249e-13	-0.287125	0.194	0.347	8.42755e-09	8	X2810403D21Rik
X6330403K07Rik2	3.50687e-13	-0.267322	0.773	0.838	8.86852e-09	8	X6330403K07Rik
Lats2	3.77344e-13	0.383965	0.24	0.115	9.54266e-09	8	Lats2
Atp8a11	3.94466e-13	-0.361227	0.229	0.375	9.97565e-09	8	Atp8a1
Slc23a2	4.69286e-13	-0.411419	0.167	0.304	1.18678e-08	8	Slc23a2
Cnr12	4.90822e-13	-0.32803	0.368	0.524	1.24124e-08	8	Cnr1
Cited2	5.11976e-13	0.31258	0.434	0.274	1.29474e-08	8	Cited2
Disp2	5.25451e-13	-0.336987	0.272	0.418	1.32881e-08	8	Disp2
Tmem255a1	5.73405e-13	-0.291695	0.182	0.331	1.45008e-08	8	Tmem255a
Wwp1	5.89014e-13	0.290054	0.163	0.059	1.48956e-08	8	Wwp1
Id41	6.30817e-13	0.293442	0.281	0.142	1.59527e-08	8	Id4
Ywhah	6.83926e-13	-0.300679	0.71	0.787	1.72958e-08	8	Ywhah
Cdr2	6.87449e-13	0.27085	0.182	0.07	1.73849e-08	8	Cdr2
Rit2	7.14177e-13	-0.283827	0.695	0.783	1.80608e-08	8	Rit2
Snx7	7.14538e-13	-0.254561	0.066	0.176	1.80699e-08	8	Snx7
Socs21	1.21592e-12	0.326483	0.272	0.144	3.07495e-08	8	Socs2
Slc22a23	1.34588e-12	0.274697	0.176	0.068	3.40359e-08	8	Slc22a23
Elavl2	1.43798e-12	-0.308237	0.059	0.16	3.63651e-08	8	Elavl2
Stk39	2.02508e-12	0.331285	0.422	0.283	5.12121e-08	8	Stk39
Uqcc2	2.0655e-12	-0.302632	0.106	0.228	5.22343e-08	8	Uqcc2
Galnt13	2.32032e-12	-0.280598	0.272	0.428	5.86786e-08	8	Galnt13
Gpr1392	2.9427e-12	-0.359425	0.369	0.509	7.44179e-08	8	Gpr139
Cmip1	3.10919e-12	0.282849	0.65	0.509	7.86282e-08	8	Cmip
Rtn4r	3.35218e-12	0.274927	0.238	0.116	8.47732e-08	8	Rtn4r
Fstl1	4.19759e-12	0.35824	0.394	0.253	1.06153e-07	8	Fstl1
Camta11	5.3505e-12	-0.325091	0.458	0.595	1.35309e-07	8	Camta1
Fam81a	5.51085e-12	-0.322013	0.059	0.156	1.39364e-07	8	Fam81a
Coro2b2	5.57303e-12	0.288215	0.578	0.446	1.40936e-07	8	Coro2b
Sv2b	6.40312e-12	0.294675	0.732	0.638	1.61929e-07	8	Sv2b
Bend5	6.51529e-12	0.312148	0.204	0.092	1.64765e-07	8	Bend5
Klhl131	6.81163e-12	-0.319958	0.361	0.5	1.72259e-07	8	Klhl13
Kif2a	8.63571e-12	0.33049	0.405	0.259	2.18388e-07	8	Kif2a
Sostdc12	8.7377e-12	-0.294768	0.116	0.235	2.20968e-07	8	Sostdc1
Atp2c1	8.81675e-12	0.334624	0.554	0.428	2.22967e-07	8	Atp2c1
Mphosph6	1.06282e-11	0.386178	0.265	0.148	2.68777e-07	8	Mphosph6
Ncdn	1.07118e-11	-0.302742	0.603	0.698	2.70891e-07	8	Ncdn
Sipa1l2	1.09269e-11	-0.378053	0.347	0.456	2.76331e-07	8	Sipa1l2
Klhl5	1.10672e-11	-0.293426	0.181	0.319	2.79878e-07	8	Klhl5
Synpr2	1.54792e-11	0.447961	0.126	0.057	3.91452e-07	8	Synpr
Ppp1r1a	1.82424e-11	-0.28324	0.16	0.289	4.61333e-07	8	Ppp1r1a
Impdh11	1.86454e-11	0.287354	0.333	0.2	4.71523e-07	8	Impdh1
Pnmal12	2.26672e-11	0.296876	0.603	0.472	5.7323e-07	8	Pnmal1
Colgalt2	2.4895e-11	0.287168	0.187	0.081	6.2957e-07	8	Colgalt2
Necab32	2.57919e-11	0.338923	0.442	0.298	6.52252e-07	8	Necab3
Zfas12	2.60381e-11	-0.322741	0.468	0.584	6.58477e-07	8	Zfas1
Stx31	3.0216e-11	-0.306774	0.136	0.26	7.64133e-07	8	Stx3
Cystm11	3.03667e-11	0.295825	0.455	0.306	7.67943e-07	8	Cystm1
Sparcl1	3.08038e-11	-0.320146	0.056	0.152	7.78997e-07	8	Sparcl1
St6galnac51	3.61467e-11	0.262544	0.751	0.668	9.14115e-07	8	St6galnac5
Slitrk51	4.06698e-11	0.268878	0.149	0.058	1.0285e-06	8	Slitrk5
Satb11	4.09622e-11	-0.25564	0.048	0.129	1.03589e-06	8	Satb1
Rasgef1b1	4.12356e-11	0.371196	0.33	0.206	1.04281e-06	8	Rasgef1b
Rab11fip4	4.58498e-11	-0.267247	0.172	0.302	1.15949e-06	8	Rab11fip4
Dennd2a	6.34734e-11	-0.264018	0.079	0.182	1.60518e-06	8	Dennd2a
Cd63	6.35612e-11	0.319942	0.571	0.452	1.6074e-06	8	Cd63
Asic4	6.39928e-11	-0.3243	0.095	0.197	1.61831e-06	8	Asic4
Egr12	7.30261e-11	-0.576587	0.161	0.244	1.84676e-06	8	Egr1
Slc4a10	8.06764e-11	-0.257707	0.135	0.258	2.04023e-06	8	Slc4a10
Ablim2	9.07981e-11	0.25196	0.423	0.275	2.29619e-06	8	Ablim2
Pdlim7	9.26663e-11	-0.26991	0.149	0.266	2.34344e-06	8	Pdlim7
Pdzd4	9.65077e-11	-0.292797	0.233	0.37	2.44058e-06	8	Pdzd4
Cebpb	1.06213e-10	0.262967	0.18	0.077	2.68601e-06	8	Cebpb
Dner	1.07443e-10	0.274634	0.677	0.562	2.71712e-06	8	Dner
Cxx1b1	1.18915e-10	0.296322	0.633	0.525	3.00724e-06	8	Cxx1b
Tnfaip8	1.19918e-10	0.278561	0.199	0.092	3.03261e-06	8	Tnfaip8
Chga	1.25679e-10	-0.277376	0.109	0.22	3.1783e-06	8	Chga
Phf242	1.49217e-10	-0.268804	0.331	0.473	3.77356e-06	8	Phf24
Fam105a	2.03801e-10	-0.326374	0.041	0.12	5.15394e-06	8	Fam105a
Slc12a21	2.08388e-10	0.373303	0.286	0.169	5.26991e-06	8	Slc12a2
Kif21a1	2.12985e-10	-0.278653	0.579	0.668	5.38618e-06	8	Kif21a
Neurod11	2.59592e-10	0.280749	0.368	0.231	6.56482e-06	8	Neurod1
Cadps2	2.97082e-10	-0.263862	0.682	0.753	7.51291e-06	8	Cadps2
Chst22	3.02323e-10	0.28194	0.683	0.577	7.64545e-06	8	Chst2
Nsg1	3.32795e-10	-0.263312	0.52	0.644	8.41606e-06	8	Nsg1
Tnks1	3.73594e-10	0.317654	0.405	0.271	9.44781e-06	8	Tnks
Cnnm21	4.72492e-10	0.288157	0.401	0.28	1.19488e-05	8	Cnnm2
Tceal6	5.03506e-10	-0.280709	0.251	0.377	1.27332e-05	8	Tceal6
Sez6l2	5.68487e-10	-0.286404	0.396	0.528	1.43765e-05	8	Sez6l2
Nefh	6.11326e-10	-0.344762	0.233	0.358	1.54598e-05	8	Nefh
Tppp32	6.32275e-10	0.293493	0.49	0.365	1.59896e-05	8	Tppp3
Slc25a11	6.94929e-10	0.265408	0.481	0.342	1.75741e-05	8	Slc25a1
Ckb1	8.40802e-10	-0.273056	0.519	0.628	2.12631e-05	8	Ckb
Irs2	1.29216e-09	0.280138	0.291	0.171	3.26774e-05	8	Irs2
Epdr1	1.34701e-09	0.286271	0.327	0.199	3.40646e-05	8	Epdr1
Lef1	1.38413e-09	-0.272238	0.085	0.18	3.50032e-05	8	Lef1
Tgfb22	1.4705e-09	-0.343277	0.24	0.344	3.71874e-05	8	Tgfb2
P4ha1	1.81322e-09	0.252301	0.211	0.105	4.58544e-05	8	P4ha1
Mgat5b	2.22802e-09	-0.256323	0.066	0.153	5.63444e-05	8	Mgat5b
Dnm3	2.75625e-09	-0.272016	0.147	0.254	6.97027e-05	8	Dnm3
Map4	2.81971e-09	-0.269875	0.652	0.723	7.13076e-05	8	Map4
Acot7	2.8344e-09	0.252128	0.755	0.675	7.16792e-05	8	Acot7
Pianp	3.19549e-09	-0.256214	0.465	0.573	8.08107e-05	8	Pianp
Prpf19	3.22351e-09	-0.294186	0.329	0.454	8.15193e-05	8	Prpf19
X6030419C18Rik2	3.32959e-09	-0.273541	0.138	0.249	8.42021e-05	8	X6030419C18Rik
Luzp21	3.55672e-09	0.258894	0.213	0.109	8.99458e-05	8	Luzp2
Higd1a	4.18089e-09	-0.306479	0.333	0.462	0.000105731	8	Higd1a
Ndfip2	4.20419e-09	0.300028	0.553	0.451	0.00010632	8	Ndfip2
Ntrk31	5.07632e-09	-0.252696	0.206	0.329	0.000128375	8	Ntrk3
Drp2	5.59727e-09	0.252186	0.2	0.105	0.000141549	8	Drp2
Lrp1	5.73552e-09	-0.277434	0.189	0.291	0.000145045	8	Lrp1
Kcnd21	6.37074e-09	0.274218	0.481	0.348	0.00016111	8	Kcnd2
Aldoc2	7.37368e-09	0.269441	0.349	0.225	0.000186473	8	Aldoc
Atp5g3	7.5294e-09	0.264379	0.689	0.587	0.000190411	8	Atp5g3
Dst	1.06281e-08	0.279922	0.538	0.451	0.000268775	8	Dst
Acot13	1.06706e-08	0.292614	0.225	0.132	0.000269848	8	Acot13
Slc17a6	1.07814e-08	-0.315542	0.508	0.58	0.000272651	8	Slc17a6
Bmp7	1.1339e-08	-0.271184	0.239	0.358	0.000286752	8	Bmp7
Zfp467	1.13585e-08	-0.299372	0.138	0.241	0.000287244	8	Zfp467
Scrt11	1.7787e-08	-0.258594	0.102	0.196	0.000449814	8	Scrt1
Pam	1.8985e-08	-0.252261	0.53	0.616	0.000480112	8	Pam
Sstr2	1.94381e-08	0.282581	0.368	0.245	0.000491571	8	Sstr2
Macf1	2.00493e-08	-0.299652	0.342	0.455	0.000507027	8	Macf1
Bhlhe41	2.38698e-08	-0.330608	0.199	0.3	0.000603643	8	Bhlhe41
Dnajc61	2.54703e-08	-0.297608	0.253	0.369	0.000644118	8	Dnajc6
Plk21	2.75179e-08	0.265096	0.354	0.234	0.000695899	8	Plk2
Fzd1	2.85896e-08	0.257568	0.469	0.358	0.000723004	8	Fzd1
Rora	3.05452e-08	-0.29535	0.095	0.184	0.000772456	8	Rora
Lrrc58	3.40066e-08	0.28798	0.399	0.288	0.000859993	8	Lrrc58
Rap1gap22	3.46989e-08	0.286657	0.328	0.224	0.0008775	8	Rap1gap2
Mark1	3.75502e-08	0.270644	0.326	0.211	0.000949606	8	Mark1
Zdbf2	3.93111e-08	-0.275543	0.101	0.19	0.000994138	8	Zdbf2
AI5044322	4.14245e-08	0.282328	0.228	0.132	0.00104759	8	AI504432
Cx3cl1	5.26443e-08	-0.258336	0.453	0.563	0.00133132	8	Cx3cl1
Pls3	5.95197e-08	0.254687	0.456	0.352	0.00150519	8	Pls3
Cyfip2	7.06827e-08	-0.299104	0.516	0.612	0.0017875	8	Cyfip2
Sel1l3	8.4521e-08	-0.303639	0.224	0.333	0.00213745	8	Sel1l3
Nnt	9.90988e-08	0.275066	0.231	0.142	0.00250611	8	Nnt
Tbc1d91	1.10318e-07	-0.254242	0.221	0.324	0.00278983	8	Tbc1d9
Erbb41	1.39549e-07	-0.257861	0.187	0.292	0.00352905	8	Erbb4
Fhl1	1.60089e-07	-0.251003	0.095	0.18	0.00404849	8	Fhl1
Adam111	1.62194e-07	0.253393	0.448	0.348	0.00410173	8	Adam11
Ppp1r1b1	1.84145e-07	0.26493	0.414	0.315	0.00465684	8	Ppp1r1b
Amotl11	1.85076e-07	-0.282331	0.326	0.428	0.00468039	8	Amotl1
Agfg1	1.92953e-07	0.26289	0.379	0.271	0.00487959	8	Agfg1
Dusp8	2.23798e-07	-0.260974	0.403	0.506	0.00565964	8	Dusp8
Klf9	2.39331e-07	-0.267238	0.152	0.253	0.00605245	8	Klf9
Ivns1abp	3.18456e-07	0.250363	0.3	0.195	0.00805343	8	Ivns1abp
Smc6	3.31729e-07	0.286039	0.301	0.201	0.0083891	8	Smc6
Ano1	3.38963e-07	0.253469	0.445	0.335	0.00857203	8	Ano1
Aatk	3.45266e-07	-0.281602	0.178	0.268	0.00873144	8	Aatk
Baiap31	3.76559e-07	-0.261982	0.441	0.529	0.00952281	8	Baiap3
Tmem351	3.90942e-07	0.300253	0.307	0.208	0.00988654	8	Tmem35
Slc35f1	3.90962e-07	-0.263774	0.042	0.104	0.00988705	8	Slc35f1
Stmn11	4.65679e-07	-0.320051	0.232	0.296	0.0117765	8	Stmn1
Tuba4a1	6.00872e-07	-0.257771	0.146	0.231	0.0151954	8	Tuba4a
Abhd11os	6.63692e-07	-0.276304	0.194	0.292	0.0167841	8	Abhd11os
Tpst1	7.72997e-07	-0.250199	0.146	0.238	0.0195483	8	Tpst1
Fam63b1	1.28725e-06	-0.254853	0.429	0.528	0.0325534	8	Fam63b
Aida	1.44059e-06	-0.256185	0.357	0.461	0.0364312	8	Aida
Dach1	1.47567e-06	-0.250045	0.238	0.34	0.0373181	8	Dach1
Cd471	1.73896e-06	-0.298163	0.305	0.385	0.0439766	8	Cd47
Klf62	1.92358e-06	0.314609	0.318	0.223	0.0486453	8	Klf6
Tpp1	3.17569e-06	0.250206	0.461	0.367	0.08031	8	Tpp1
Cers4	4.86421e-06	-0.264658	0.374	0.442	0.123011	8	Cers4
2019-06-02	8.94722e-06	-0.39235	0.161	0.242	0.226266	8	Jun
Slc39a10	5.64494e-05	0.274979	0.331	0.246	1	8	Slc39a10
Calb11	1.87256e-68	1.90556	0.605	0.029	4.73551e-64	9	Calb1
Cadm13	4.35027e-54	1.5378	0.724	0.218	1.10014e-49	9	Cadm1
Cplx12	1.44618e-48	-1.0198	0.465	0.849	3.65724e-44	9	Cplx1
Atp1a12	1.37461e-46	-0.869558	0.779	0.924	3.47625e-42	9	Atp1a1
Gabra22	2.7351e-42	1.26514	0.707	0.294	6.91679e-38	9	Gabra2
Prkcb3	2.42916e-41	-0.933846	0.275	0.748	6.14311e-37	9	Prkcb
Fxyd71	5.56743e-41	-1.03457	0.137	0.576	1.40795e-36	9	Fxyd7
Cpne92	8.27935e-39	-1.19092	0.179	0.567	2.09376e-34	9	Cpne9
Pbx11	4.02307e-37	0.852937	0.889	0.714	1.01739e-32	9	Pbx1
Cadm23	4.86684e-36	-0.912893	0.475	0.824	1.23078e-31	9	Cadm2
Tagln21	1.29861e-35	0.932113	0.389	0.017	3.28407e-31	9	Tagln2
Fgf14	9.14952e-35	-1.00115	0.153	0.559	2.31382e-30	9	Fgf1
Ptgds2	9.7725e-35	-0.992523	0.266	0.643	2.47137e-30	9	Ptgds
Rab3b	1.51127e-34	-0.83699	0.023	0.324	3.82186e-30	9	Rab3b
Pcp4	1.9592e-34	0.512485	0.974	0.916	4.95461e-30	9	Pcp4
Hspb61	9.27487e-34	-1.0206	0.098	0.462	2.34552e-29	9	Hspb6
Trp53i112	1.30012e-33	1.03936	0.632	0.214	3.28788e-29	9	Trp53i11
Wif12	3.72181e-33	1.1119	0.682	0.277	9.41209e-29	9	Wif1
Tesc1	8.75337e-33	-0.906394	0.184	0.567	2.21364e-28	9	Tesc
Pygm2	4.27126e-32	-0.901822	0.101	0.458	1.08016e-27	9	Pygm
Ptpdc13	6.03313e-32	1.13015	0.504	0.109	1.52572e-27	9	Ptpdc1
Gpr1513	7.06065e-32	1.25563	0.572	0.21	1.78557e-27	9	Gpr151
Adcyap12	7.7862e-32	1.004	0.757	0.437	1.96905e-27	9	Adcyap1
Cpne43	7.8622e-32	-0.789086	0.473	0.811	1.98827e-27	9	Cpne4
Snap253	1.06003e-30	-0.536345	0.874	0.941	2.68072e-26	9	Snap25
Resp182	2.32873e-30	0.97281	0.769	0.471	5.88913e-26	9	Resp18
Pcp4l13	6.00615e-30	-0.92825	0.088	0.437	1.5189e-25	9	Pcp4l1
Cpe2	1.44435e-29	-0.580954	0.801	0.887	3.65262e-25	9	Cpe
Olfm31	6.05609e-29	-0.79581	0.474	0.807	1.53152e-24	9	Olfm3
Kcnma12	1.87862e-28	-0.657182	0.747	0.912	4.75083e-24	9	Kcnma1
Rprm2	2.49976e-28	1.05506	0.481	0.13	6.32165e-24	9	Rprm
Tmem472	1.05291e-27	-0.886731	0.279	0.63	2.6627e-23	9	Tmem47
Fabp52	1.70205e-27	-0.835398	0.224	0.605	4.30432e-23	9	Fabp5
Asic41	3.17321e-27	-0.760339	0.111	0.445	8.02474e-23	9	Asic4
Cytip3	4.23449e-26	0.91296	0.327	0.025	1.07086e-21	9	Cytip
X1810041L15Rik2	4.80599e-26	0.808776	0.704	0.34	1.21539e-21	9	X1810041L15Rik
Cplx21	1.55545e-25	-0.936424	0.247	0.605	3.93357e-21	9	Cplx2
Ebf11	1.95755e-25	-0.778076	0.085	0.395	4.95044e-21	9	Ebf1
Nfix2	2.37015e-25	-0.741702	0.111	0.441	5.99388e-21	9	Nfix
Kif21a2	9.96216e-25	-0.635196	0.608	0.84	2.51933e-20	9	Kif21a
Atp1b23	3.15222e-24	-0.718471	0.496	0.756	7.97164e-20	9	Atp1b2
Nr4a22	5.25527e-24	1.01412	0.562	0.218	1.32901e-19	9	Nr4a2
Caly3	7.15867e-24	0.826592	0.588	0.231	1.81036e-19	9	Caly
Syt61	7.35438e-24	-0.543279	0.773	0.845	1.85985e-19	9	Syt6
Nfib3	2.51184e-23	-0.740798	0.155	0.496	6.35219e-19	9	Nfib
X6330403A02Rik2	3.19885e-23	-0.608741	0.754	0.87	8.08957e-19	9	X6330403A02Rik
Grin3a2	7.17857e-23	0.844583	0.338	0.046	1.81539e-18	9	Grin3a
Baiap32	1.01543e-22	0.794097	0.618	0.269	2.56793e-18	9	Baiap3
Megf111	2.33557e-22	-0.866959	0.066	0.324	5.90643e-18	9	Megf11
Tyrp1	4.56332e-22	-0.893508	0.166	0.458	1.15402e-17	9	Tyrp1
Wls1	5.18763e-22	-0.653979	0.546	0.828	1.3119e-17	9	Wls
Olfm11	2.79091e-21	0.681046	0.86	0.714	7.05793e-17	9	Olfm1
Celf22	5.73855e-21	-0.539329	0.734	0.887	1.45122e-16	9	Celf2
Lypd6	7.71638e-21	-0.456911	0.016	0.21	1.95139e-16	9	Lypd6
Pbx32	4.18599e-20	0.793866	0.571	0.265	1.0586e-15	9	Pbx3
Kcnmb43	5.30056e-20	0.881373	0.276	0.029	1.34046e-15	9	Kcnmb4
Tubb2b2	6.46057e-20	1.10744	0.464	0.193	1.63381e-15	9	Tubb2b
Fxyd62	4.06837e-19	0.823298	0.314	0.05	1.02885e-14	9	Fxyd6
Fibcd12	6.40579e-19	-0.642492	0.331	0.651	1.61996e-14	9	Fibcd1
Amigo23	1.80803e-18	0.868924	0.47	0.197	4.57232e-14	9	Amigo2
Necab33	2.86992e-18	-0.657881	0.221	0.521	7.25775e-14	9	Necab3
Pea15a1	3.32012e-18	-0.611007	0.419	0.681	8.39625e-14	9	Pea15a
A730017C20Rik2	4.21443e-18	0.770644	0.488	0.197	1.06579e-13	9	A730017C20Rik
Ngb1	4.5091e-18	0.690193	0.448	0.147	1.14031e-13	9	Ngb
Chst12	5.55412e-18	0.806894	0.396	0.118	1.40458e-13	9	Chst1
Snca2	5.92468e-18	0.704751	0.418	0.122	1.49829e-13	9	Snca
Cbln42	6.91914e-18	-0.599569	0.156	0.445	1.74978e-13	9	Cbln4
Zcchc122	7.54258e-18	0.594781	0.838	0.66	1.90744e-13	9	Zcchc12
Fosb2	8.29182e-18	0.916633	0.298	0.046	2.09692e-13	9	Fosb
Nek71	1.33072e-17	0.673332	0.734	0.525	3.36525e-13	9	Nek7
Ctnnbip12	1.59266e-17	0.759074	0.64	0.353	4.02768e-13	9	Ctnnbip1
Tmsb4x1	1.65528e-17	0.759971	0.747	0.555	4.18604e-13	9	Tmsb4x
Rbfox32	2.15121e-17	-0.544286	0.236	0.546	5.44019e-13	9	Rbfox3
Efnb33	3.15302e-17	0.582191	0.529	0.235	7.97367e-13	9	Efnb3
Stmn12	3.24424e-17	0.932209	0.358	0.113	8.20437e-13	9	Stmn1
Fstl51	1.27037e-16	0.582723	0.208	0.013	3.21265e-12	9	Fstl5
Tgfb23	1.31233e-16	0.699098	0.418	0.13	3.31875e-12	9	Tgfb2
Ahi12	1.65466e-16	0.690001	0.681	0.429	4.18447e-12	9	Ahi1
Pld53	1.68977e-16	-0.66361	0.259	0.538	4.27326e-12	9	Pld5
Fos2	5.24879e-16	0.85739	0.353	0.092	1.32737e-11	9	Fos
Rspo43	7.51574e-16	0.54604	0.214	0.017	1.90066e-11	9	Rspo4
Htr5b2	1.07462e-15	0.531109	0.241	0.029	2.71762e-11	9	Htr5b
Ptprm1	1.67935e-15	-0.702662	0.097	0.328	4.24692e-11	9	Ptprm
Cbln11	1.72496e-15	0.691478	0.436	0.189	4.36224e-11	9	Cbln1
Dusp12	1.53142e-14	0.750903	0.328	0.084	3.87282e-10	9	Dusp1
Lhx92	2.14452e-14	0.659745	0.598	0.387	5.42327e-10	9	Lhx9
Gm11744	2.38344e-14	-0.436511	0.039	0.218	6.02748e-10	9	Gm11744
Sorl1	2.77752e-14	-0.608692	0.169	0.387	7.02408e-10	9	Sorl1
Kcnd31	3.84541e-14	0.616833	0.377	0.122	9.72465e-10	9	Kcnd3
Rpl231	4.21888e-14	0.574002	0.828	0.761	1.06691e-09	9	Rpl23
Avil2	5.58758e-14	-0.562005	0.162	0.416	1.41304e-09	9	Avil
Gpx31	5.80138e-14	0.52905	0.192	0.017	1.46711e-09	9	Gpx3
Syt1	7.27675e-14	-0.389008	0.808	0.887	1.84022e-09	9	Syt1
Car4	7.3332e-14	-0.329951	0.025	0.181	1.85449e-09	9	Car4
Cck2	7.66944e-14	0.511368	0.848	0.647	1.93952e-09	9	Cck
Hpcal11	7.73383e-14	-0.538461	0.468	0.672	1.95581e-09	9	Hpcal1
Slc17a71	9.19429e-14	-0.547699	0.36	0.622	2.32515e-09	9	Slc17a7
Kif26a1	1.259e-13	0.701687	0.178	0.013	3.18389e-09	9	Kif26a
Sncg2	1.48267e-13	0.488429	0.816	0.718	3.74953e-09	9	Sncg
Egr13	1.62148e-13	0.961854	0.302	0.076	4.10055e-09	9	Egr1
Sphkap2	1.78427e-13	0.615755	0.334	0.097	4.51225e-09	9	Sphkap
X4833423E24Rik	2.10406e-13	-0.730173	0.049	0.231	5.32097e-09	9	X4833423E24Rik
A930003A15Rik	2.55378e-13	-0.311448	0.004	0.113	6.45824e-09	9	A930003A15Rik
Ly6h1	3.05263e-13	0.569875	0.621	0.374	7.7198e-09	9	Ly6h
Fgf132	3.8468e-13	-0.444909	0.033	0.193	9.72816e-09	9	Fgf13
Gfra12	4.08804e-13	-0.426771	0.652	0.798	1.03383e-08	9	Gfra1
Clstn23	5.2015e-13	0.45176	0.223	0.034	1.31541e-08	9	Clstn2
Nefh1	6.67438e-13	-0.533927	0.292	0.55	1.68788e-08	9	Nefh
Ldha2	7.04843e-13	0.568937	0.662	0.496	1.78248e-08	9	Ldha
Chrnb33	7.29988e-13	-0.526046	0.069	0.261	1.84607e-08	9	Chrnb3
Dclk11	9.37154e-13	-0.418503	0.695	0.849	2.36997e-08	9	Dclk1
St3gal52	1.4396e-12	-0.516677	0.168	0.403	3.64061e-08	9	St3gal5
Lrrn11	1.49168e-12	-0.5078	0.092	0.286	3.77232e-08	9	Lrrn1
Peg31	2.02769e-12	0.557378	0.736	0.613	5.12782e-08	9	Peg3
Cmbl2	2.29162e-12	0.398473	0.142	0.004	5.79528e-08	9	Cmbl
Scg3	2.41065e-12	-0.524619	0.53	0.731	6.09631e-08	9	Scg3
Sulf2	2.44182e-12	0.516753	0.65	0.395	6.17512e-08	9	Sulf2
Ildr21	2.57813e-12	0.629591	0.289	0.08	6.51983e-08	9	Ildr2
Parm12	2.767e-12	0.515165	0.185	0.021	6.99747e-08	9	Parm1
Ap1s22	3.16123e-12	0.635683	0.384	0.168	7.99442e-08	9	Ap1s2
Msn	3.34396e-12	-0.413473	0.048	0.214	8.45653e-08	9	Msn
Homer21	3.37971e-12	-0.475185	0.169	0.408	8.54695e-08	9	Homer2
Cd24a	3.44536e-12	-0.430407	0.02	0.155	8.71296e-08	9	Cd24a
Nrn12	4.31364e-12	-0.345525	0.845	0.937	1.09088e-07	9	Nrn1
X3632451O06Rik2	5.25466e-12	-0.586791	0.298	0.534	1.32885e-07	9	X3632451O06Rik
Cdhr11	6.14238e-12	0.348814	0.139	0.004	1.55335e-07	9	Cdhr1
Tmem561	6.53944e-12	-0.439548	0.475	0.706	1.65376e-07	9	Tmem56
Dusp182	6.78797e-12	0.606052	0.247	0.055	1.71661e-07	9	Dusp18
Tppp33	7.13023e-12	0.665735	0.421	0.202	1.80316e-07	9	Tppp3
Rapgef42	7.2405e-12	-0.398727	0.104	0.311	1.83105e-07	9	Rapgef4
Gnaz3	1.0641e-11	0.469964	0.425	0.185	2.69101e-07	9	Gnaz
Gad1	1.08921e-11	-0.418161	0.029	0.172	2.75452e-07	9	Gad1
Tubb4a1	1.39315e-11	-0.454244	0.405	0.626	3.52313e-07	9	Tubb4a
Cited21	1.62371e-11	0.549803	0.329	0.113	4.10621e-07	9	Cited2
Cngb3	2.08279e-11	-0.380381	0.007	0.109	5.26717e-07	9	Cngb3
Pcdh92	2.46476e-11	0.602541	0.588	0.366	6.23314e-07	9	Pcdh9
Id42	3.06225e-11	0.48453	0.182	0.025	7.74412e-07	9	Id4
Col5a31	3.2548e-11	0.260583	0.105	0	8.23106e-07	9	Col5a3
Lmo41	3.54957e-11	-0.47827	0.078	0.261	8.9765e-07	9	Lmo4
Col16a12	3.90397e-11	0.559766	0.468	0.239	9.87276e-07	9	Col16a1
Cadps21	3.95358e-11	-0.393455	0.727	0.828	9.99821e-07	9	Cadps2
Cmip2	3.98602e-11	0.530076	0.566	0.34	1.00802e-06	9	Cmip
Cacna1e	4.51337e-11	-0.511927	0.436	0.651	1.14139e-06	9	Cacna1e
Cntnap41	6.41512e-11	-0.512688	0.345	0.555	1.62232e-06	9	Cntnap4
Aes1	6.65777e-11	-0.381119	0.72	0.803	1.68368e-06	9	Aes
Pcdh17	6.76001e-11	0.474865	0.221	0.055	1.70954e-06	9	Pcdh17
Slc24a22	7.41301e-11	-0.538638	0.078	0.248	1.87468e-06	9	Slc24a2
Elmo11	9.71578e-11	0.390059	0.221	0.046	2.45702e-06	9	Elmo1
Cacna1g	9.93364e-11	0.356908	0.139	0.008	2.51212e-06	9	Cacna1g
Nap1l53	1.06159e-10	1.01114	0.211	0.055	2.68467e-06	9	Nap1l5
Lhfpl1	1.55455e-10	-0.288755	0.014	0.126	3.93131e-06	9	Lhfpl1
Zdhhc181	2.08739e-10	-0.453968	0.26	0.483	5.27879e-06	9	Zdhhc18
Ptprr	2.57935e-10	-0.34246	0.189	0.412	6.52293e-06	9	Ptprr
Gng82	3.1578e-10	0.463545	0.79	0.672	7.98575e-06	9	Gng8
Bcam	3.24949e-10	-0.421647	0.066	0.223	8.21763e-06	9	Bcam
Cd59a1	3.9241e-10	0.440669	0.228	0.055	9.92365e-06	9	Cd59a
Cers41	3.97851e-10	-0.48128	0.387	0.601	1.00613e-05	9	Cers4
Jam32	4.01638e-10	0.679048	0.371	0.176	1.0157e-05	9	Jam3
Tagln32	4.67569e-10	-0.454987	0.462	0.668	1.18244e-05	9	Tagln3
Tmem1301	5.2524e-10	0.396293	0.895	0.828	1.32828e-05	9	Tmem130
Epha41	5.49455e-10	-0.470049	0.064	0.223	1.38952e-05	9	Epha4
Klhl291	5.65593e-10	-0.39081	0.113	0.303	1.43033e-05	9	Klhl29
Amph2	6.13736e-10	0.558055	0.493	0.282	1.55208e-05	9	Amph
Tfrc1	7.64859e-10	-0.527924	0.332	0.534	1.93425e-05	9	Tfrc
Fam163a1	8.60601e-10	-0.391115	0.113	0.298	2.17638e-05	9	Fam163a
Slc6a72	1.22802e-09	0.323521	0.149	0.017	3.10553e-05	9	Slc6a7
Slc17a61	1.4247e-09	-0.475553	0.538	0.702	3.60291e-05	9	Slc17a6
Gdpd52	1.87666e-09	-0.404573	0.058	0.206	4.74588e-05	9	Gdpd5
X2010204K13Rik2	2.02983e-09	0.590602	0.279	0.105	5.13325e-05	9	X2010204K13Rik
Tmem182	2.10698e-09	-0.28544	0.016	0.118	5.32834e-05	9	Tmem182
Rpl211	2.33229e-09	0.494099	0.673	0.576	5.89812e-05	9	Rpl21
2019-06-03	2.47938e-09	0.425907	0.29	0.101	6.27009e-05	9	Jun
Brinp31	2.73495e-09	-0.316677	0.078	0.239	6.9164e-05	9	Brinp3
Rpl36a1	2.82916e-09	0.459864	0.658	0.5	7.15467e-05	9	Rpl36a
Magi12	3.20181e-09	0.39803	0.289	0.101	8.09705e-05	9	Magi1
Atp2b32	3.2995e-09	-0.4112	0.202	0.408	8.3441e-05	9	Atp2b3
Fam19a5	3.36043e-09	-0.377202	0.074	0.231	8.49819e-05	9	Fam19a5
Dnajc121	3.36584e-09	0.463135	0.494	0.277	8.51187e-05	9	Dnajc12
Ndst11	3.46566e-09	0.417769	0.312	0.118	8.76432e-05	9	Ndst1
Tnfaip81	3.80292e-09	0.322395	0.121	0.008	9.61719e-05	9	Tnfaip8
Plce1	4.14903e-09	-0.273153	0.069	0.223	0.000104925	9	Plce1
Acsl11	4.277e-09	-0.466578	0.202	0.412	0.000108161	9	Acsl1
Celf32	5.65994e-09	0.545077	0.542	0.345	0.000143134	9	Celf3
Jund2	6.02256e-09	0.395244	0.783	0.685	0.000152304	9	Jund
Tnfrsf192	6.33554e-09	0.286516	0.118	0.008	0.00016022	9	Tnfrsf19
Enc1	7.56347e-09	0.486778	0.707	0.584	0.000191273	9	Enc1
Rgs41	7.81146e-09	0.557553	0.309	0.122	0.000197544	9	Rgs4
Slc2a132	7.88731e-09	-0.339062	0.675	0.815	0.000199462	9	Slc2a13
Prkch3	8.65245e-09	0.313292	0.105	0.004	0.000218812	9	Prkch
Fndc5	1.01783e-08	-0.461505	0.049	0.172	0.000257398	9	Fndc5
Eya1	1.0437e-08	-0.285385	0.04	0.168	0.000263942	9	Eya1
Rap1gap1	1.09506e-08	-0.395233	0.632	0.765	0.000276929	9	Rap1gap
Scoc	1.10509e-08	-0.377317	0.655	0.786	0.000279467	9	Scoc
Rtn4	1.15561e-08	-0.28385	0.785	0.891	0.000292242	9	Rtn4
Wbscr171	1.24722e-08	-0.288185	0.204	0.408	0.00031541	9	Wbscr17
Hs3st1	1.35256e-08	-0.414342	0.035	0.155	0.000342048	9	Hs3st1
Thrb	1.37367e-08	-0.415636	0.029	0.143	0.000347388	9	Thrb
Slc35f11	1.41175e-08	-0.569889	0.068	0.21	0.000357018	9	Slc35f1
Ncald2	1.48415e-08	-0.420678	0.655	0.807	0.000375326	9	Ncald
Tcf7l2	1.48595e-08	-0.315208	0.756	0.861	0.000375783	9	Tcf7l2
Pcdh10	1.64251e-08	-0.289686	0.023	0.13	0.000415374	9	Pcdh10
Coro71	1.70265e-08	-0.432649	0.162	0.349	0.000430582	9	Coro7
Tbc1d92	1.72447e-08	-0.418168	0.27	0.479	0.000436101	9	Tbc1d9
Chrnb42	2.48798e-08	0.492922	0.377	0.181	0.000629186	9	Chrnb4
Chrm1	2.49374e-08	-0.346364	0.029	0.139	0.000630643	9	Chrm1
Usp252	2.545e-08	-0.345784	0.066	0.21	0.000643604	9	Usp25
Gas61	2.82938e-08	-0.413387	0.173	0.361	0.000715522	9	Gas6
Chrna32	3.1607e-08	0.445232	0.237	0.08	0.000799309	9	Chrna3
Cnih32	3.27263e-08	0.335408	0.159	0.029	0.000827616	9	Cnih3
Akain1	3.43341e-08	0.463584	0.286	0.109	0.000868276	9	Akain1
mt.Nd5	3.61489e-08	-0.390434	0.738	0.866	0.000914169	9	mt.Nd5
F2r	3.63237e-08	-0.28635	0.039	0.16	0.000918589	9	F2r
Cox6b21	3.90747e-08	-0.310204	0.105	0.269	0.000988159	9	Cox6b2
Hlf1	3.94236e-08	-0.35722	0.105	0.269	0.000996984	9	Hlf
Sv2a1	4.10609e-08	-0.324917	0.767	0.849	0.00103839	9	Sv2a
Sh3gl21	4.31675e-08	-0.359761	0.634	0.739	0.00109166	9	Sh3gl2
Itpr11	4.50148e-08	0.429169	0.188	0.046	0.00113838	9	Itpr1
Gabra11	4.74681e-08	0.328766	0.156	0.029	0.00120042	9	Gabra1
Bcl11b1	4.98474e-08	0.381893	0.253	0.088	0.00126059	9	Bcl11b
Cd472	5.07917e-08	-0.432637	0.338	0.521	0.00128447	9	Cd47
Gnb42	5.09358e-08	0.334882	0.201	0.055	0.00128812	9	Gnb4
Hmgcr1	5.45726e-08	0.588526	0.358	0.189	0.00138009	9	Hmgcr
Slc22a17	5.46622e-08	-0.256849	0.829	0.891	0.00138235	9	Slc22a17
Btbd3	5.67817e-08	0.414505	0.386	0.202	0.00143595	9	Btbd3
Tnr1	5.7882e-08	0.415925	0.514	0.366	0.00146378	9	Tnr
Pnmal13	6.18558e-08	0.474799	0.513	0.353	0.00156427	9	Pnmal1
Fam19a41	6.27618e-08	0.428778	0.392	0.193	0.00158718	9	Fam19a4
Scube3	6.43234e-08	0.409088	0.389	0.193	0.00162668	9	Scube3
Tm7sf3	6.57762e-08	-0.285929	0.045	0.168	0.00166341	9	Tm7sf3
Fzd11	6.66555e-08	0.471716	0.406	0.218	0.00168565	9	Fzd1
Fam81a1	6.71524e-08	0.384274	0.192	0.05	0.00169822	9	Fam81a
Calcrl	7.10999e-08	-0.452694	0.111	0.261	0.00179805	9	Calcrl
Chl1	7.63517e-08	0.36283	0.13	0.021	0.00193086	9	Chl1
Ablim21	7.72512e-08	0.428609	0.321	0.143	0.00195361	9	Ablim2
Tmeff21	8.03075e-08	0.356198	0.117	0.013	0.0020309	9	Tmeff2
Ache1	8.0921e-08	-0.40383	0.316	0.496	0.00204641	9	Ache
Gm17494	8.21285e-08	-0.364626	0.097	0.252	0.00207695	9	Gm17494
Grm51	8.36659e-08	-0.391926	0.223	0.412	0.00211583	9	Grm5
Stmn3	8.61883e-08	-0.250068	0.85	0.903	0.00217962	9	Stmn3
Slc44a5	8.72065e-08	-0.291487	0.035	0.147	0.00220537	9	Slc44a5
Gm4076	8.77749e-08	-0.336369	0.293	0.496	0.00221974	9	Gm4076
Sox52	9.32915e-08	0.469287	0.406	0.218	0.00235925	9	Sox5
Cystm12	9.44654e-08	0.424831	0.354	0.168	0.00238894	9	Cystm1
Hpcal41	1.05823e-07	0.37134	0.276	0.113	0.00267615	9	Hpcal4
Kcnd22	1.06327e-07	-0.402359	0.302	0.483	0.00268891	9	Kcnd2
Tat1	1.06685e-07	0.284776	0.105	0.008	0.00269795	9	Tat
Rnf128	1.32026e-07	0.358099	0.123	0.017	0.00333879	9	Rnf128
Atp2b22	1.34422e-07	-0.451556	0.201	0.378	0.0033994	9	Atp2b2
Ccdc1841	1.36107e-07	0.401409	0.225	0.076	0.00344201	9	Ccdc184
Ube2e2	1.42739e-07	-0.380087	0.171	0.349	0.00360972	9	Ube2e2
Rimbp21	1.4794e-07	0.363397	0.225	0.076	0.00374125	9	Rimbp2
Idi12	1.60649e-07	0.506649	0.397	0.227	0.00406264	9	Idi1
Atp6v0e2	1.90166e-07	-0.374796	0.41	0.584	0.0048091	9	Atp6v0e2
Pitpnm3	1.93402e-07	0.429236	0.217	0.076	0.00489095	9	Pitpnm3
Fstl11	2.00876e-07	0.457808	0.293	0.134	0.00507994	9	Fstl1
Clec18a2	2.04791e-07	-0.272509	0.026	0.126	0.00517896	9	Clec18a
Robo32	2.08328e-07	-0.434805	0.123	0.265	0.0052684	9	Robo3
Rgs102	2.45061e-07	0.31148	0.199	0.059	0.00619734	9	Rgs10
Rps17	2.45725e-07	0.340745	0.79	0.718	0.00621415	9	Rps17
Sptbn1	2.75368e-07	-0.369169	0.669	0.769	0.00696377	9	Sptbn1
Ptms	2.84829e-07	-0.330248	0.754	0.845	0.00720303	9	Ptms
Aldoc3	3.0173e-07	0.296073	0.266	0.105	0.00763046	9	Aldoc
Hmgcs11	3.06829e-07	0.598419	0.458	0.294	0.00775939	9	Hmgcs1
Gpm6b	3.748e-07	0.402706	0.629	0.525	0.00947832	9	Gpm6b
Atp5g31	3.80022e-07	0.519084	0.611	0.517	0.00961039	9	Atp5g3
Arl4c1	3.86241e-07	0.395299	0.355	0.176	0.00976764	9	Arl4c
Rps31	3.96937e-07	0.321903	0.845	0.756	0.0100381	9	Rps3
Sipa1l21	4.06504e-07	-0.332389	0.405	0.605	0.0102801	9	Sipa1l2
Emb	4.15631e-07	-0.336359	0.055	0.176	0.0105109	9	Emb
Grina1	4.25315e-07	-0.360293	0.527	0.689	0.0107558	9	Grina
Sqle1	4.25911e-07	0.495243	0.295	0.139	0.0107709	9	Sqle
Ephb11	4.3649e-07	-0.341226	0.208	0.387	0.0110384	9	Ephb1
Scrt12	4.3941e-07	-0.368399	0.153	0.319	0.0111122	9	Scrt1
Efhd22	4.40262e-07	0.413211	0.194	0.063	0.0111338	9	Efhd2
Nrcam2	4.50322e-07	-0.326888	0.306	0.496	0.0113882	9	Nrcam
Cabp71	4.92232e-07	-0.344977	0.127	0.282	0.012448	9	Cabp7
Stmn22	5.43748e-07	-0.317872	0.711	0.761	0.0137508	9	Stmn2
Nxph1	5.44137e-07	0.319804	0.152	0.034	0.0137607	9	Nxph1
Mgll2	6.24086e-07	0.391915	0.301	0.134	0.0157825	9	Mgll
Gng22	6.76371e-07	-0.340253	0.312	0.5	0.0171047	9	Gng2
Csdc21	6.80922e-07	-0.380856	0.132	0.277	0.0172198	9	Csdc2
Rpl37a2	7.06377e-07	0.353834	0.737	0.685	0.0178636	9	Rpl37a
Irf2bpl1	7.38933e-07	0.452036	0.457	0.361	0.0186869	9	Irf2bpl
Aifm3	7.46265e-07	-0.362755	0.545	0.681	0.0188723	9	Aifm3
Scg21	7.79997e-07	0.419675	0.698	0.58	0.0197253	9	Scg2
Tubb2a	7.96949e-07	0.371891	0.686	0.58	0.020154	9	Tubb2a
Necab1	8.38477e-07	-0.354209	0.022	0.109	0.0212042	9	Necab1
Armt11	1.02904e-06	0.462139	0.548	0.391	0.0260235	9	Armt1
Mpped12	1.04236e-06	0.434375	0.244	0.097	0.0263602	9	Mpped1
Tex151	1.10129e-06	-0.301219	0.068	0.193	0.0278505	9	Tex15
Trpc41	1.15937e-06	0.303795	0.12	0.021	0.0293194	9	Trpc4
Garnl33	1.26556e-06	-0.363181	0.324	0.487	0.0320049	9	Garnl3
Nsf3	1.32133e-06	-0.305178	0.659	0.782	0.033415	9	Nsf
Nptx12	1.66197e-06	-0.30104	0.604	0.693	0.0420297	9	Nptx1
Mtpn	1.69492e-06	-0.488944	0.329	0.5	0.0428627	9	Mtpn
Tob12	1.73564e-06	0.372497	0.302	0.143	0.0438925	9	Tob1
Sncb1	1.75384e-06	-0.277339	0.747	0.803	0.0443529	9	Sncb
Rgs61	1.75468e-06	-0.420847	0.205	0.336	0.044374	9	Rgs6
Rap2a1	1.78056e-06	0.45446	0.347	0.185	0.0450285	9	Rap2a
Slc25a51	1.78842e-06	-0.276805	0.312	0.5	0.0452274	9	Slc25a5
Tmem1582	1.80982e-06	-0.35438	0.514	0.668	0.0457685	9	Tmem158
Klf63	1.87381e-06	0.432407	0.26	0.113	0.0473867	9	Klf6
Kcna22	2.2004e-06	-0.315528	0.302	0.487	0.0556458	9	Kcna2
Elfn11	2.29881e-06	0.388027	0.571	0.403	0.0581347	9	Elfn1
Bex42	2.47485e-06	0.442301	0.422	0.282	0.0625865	9	Bex4
Lin7a2	2.47945e-06	-0.317182	0.191	0.357	0.0627029	9	Lin7a
Ypel31	2.71698e-06	-0.391636	0.475	0.634	0.0687096	9	Ypel3
Nefm3	2.94598e-06	-0.341979	0.38	0.559	0.0745008	9	Nefm
Gatsl21	3.11712e-06	-0.397894	0.419	0.58	0.0788289	9	Gatsl2
Pde2a2	3.1574e-06	0.390654	0.627	0.529	0.0798474	9	Pde2a
Ncdn1	3.31281e-06	-0.269302	0.669	0.782	0.0837776	9	Ncdn
Atp5d	3.3386e-06	-0.316724	0.611	0.727	0.0844299	9	Atp5d
Slc22a8	3.60402e-06	-0.272154	0.023	0.105	0.0911421	9	Slc22a8
Enho2	3.95944e-06	-0.330211	0.247	0.416	0.10013	9	Enho
Sstr21	3.971e-06	0.374631	0.283	0.134	0.100423	9	Sstr2
Klf4	4.36658e-06	0.360492	0.116	0.021	0.110426	9	Klf4
Per2	4.48558e-06	0.271313	0.132	0.029	0.113436	9	Per2
Wdr61	4.63201e-06	-0.319133	0.517	0.664	0.117139	9	Wdr6
Scamp11	4.68319e-06	-0.353128	0.562	0.735	0.118433	9	Scamp1
Serinc1	4.68783e-06	-0.263672	0.805	0.861	0.11855	9	Serinc1
Tmem352	4.83605e-06	-0.278147	0.168	0.324	0.122299	9	Tmem35
Ubb	5.25555e-06	0.316386	0.746	0.66	0.132908	9	Ubb
Btg11	5.2846e-06	0.448649	0.435	0.269	0.133642	9	Btg1
Tspan131	5.58928e-06	0.267579	0.938	0.882	0.141347	9	Tspan13
Prkcq2	5.66578e-06	0.360964	0.272	0.126	0.143282	9	Prkcq
Krt2221	5.84336e-06	-0.322127	0.127	0.269	0.147773	9	Krt222
Tmem255a2	6.12251e-06	0.37565	0.371	0.214	0.154832	9	Tmem255a
Trnp11	6.17851e-06	-0.306463	0.189	0.345	0.156248	9	Trnp1
Pkia3	6.25039e-06	-0.329004	0.493	0.651	0.158066	9	Pkia
Plxna21	6.28702e-06	0.387678	0.241	0.105	0.158992	9	Plxna2
Pdxk1	6.34632e-06	0.310288	0.656	0.529	0.160492	9	Pdxk
Ntm2	6.59862e-06	-0.278319	0.124	0.265	0.166872	9	Ntm
Tub2	6.65289e-06	0.355348	0.486	0.324	0.168245	9	Tub
Arhgef12	6.78765e-06	-0.393767	0.24	0.403	0.171653	9	Arhgef12
Ndrg31	6.88257e-06	-0.363806	0.637	0.761	0.174053	9	Ndrg3
Gm4631	7.03844e-06	-0.371883	0.244	0.395	0.177995	9	Gm4631
Fat1	7.11819e-06	0.346518	0.11	0.021	0.180012	9	Fat1
Nlgn2	7.18807e-06	-0.35182	0.462	0.605	0.181779	9	Nlgn2
Pou2f2	7.24503e-06	-0.359495	0.137	0.273	0.183219	9	Pou2f2
Thsd7b1	7.24665e-06	0.301931	0.185	0.063	0.18326	9	Thsd7b
Pxylp12	8.15638e-06	-0.320082	0.22	0.382	0.206267	9	Pxylp1
Slit22	8.19344e-06	0.363565	0.311	0.16	0.207204	9	Slit2
Rgs3	8.65638e-06	0.27128	0.176	0.059	0.218911	9	Rgs3
Cntnap11	9.15777e-06	-0.328042	0.184	0.324	0.231591	9	Cntnap1
Rpl181	9.6008e-06	0.355645	0.681	0.559	0.242795	9	Rpl18
Slc6a171	1.06294e-05	0.290689	0.331	0.181	0.268808	9	Slc6a17
Rsph9	1.07261e-05	0.256722	0.142	0.038	0.271253	9	Rsph9
Cbfb1	1.16914e-05	-0.25341	0.173	0.319	0.295663	9	Cbfb
Vstm2a1	1.23417e-05	0.380517	0.354	0.197	0.312109	9	Vstm2a
Ybx1	1.25061e-05	-0.323057	0.484	0.655	0.316267	9	Ybx1
Arpc4	1.32135e-05	-0.263557	0.24	0.403	0.334155	9	Arpc4
Rpl112	1.38565e-05	0.356823	0.449	0.298	0.350417	9	Rpl11
Fam57a1	1.45246e-05	0.374455	0.143	0.042	0.367313	9	Fam57a
Tmtc2	1.45961e-05	0.292885	0.137	0.038	0.36912	9	Tmtc2
Wbscr27	1.47831e-05	-0.296698	0.142	0.277	0.373849	9	Wbscr27
Bcl2	1.49108e-05	-0.27393	0.072	0.185	0.377079	9	Bcl2
Pclo1	1.54211e-05	-0.343838	0.331	0.5	0.389983	9	Pclo
Atp6v1e11	1.54431e-05	-0.2631	0.637	0.782	0.39054	9	Atp6v1e1
Dgcr6	1.57356e-05	-0.348181	0.327	0.475	0.397939	9	Dgcr6
Camk2n2	1.6531e-05	-0.290255	0.348	0.521	0.418053	9	Camk2n2
Clmp1	1.67287e-05	0.333245	0.153	0.05	0.423053	9	Clmp
Slc8a21	1.79147e-05	0.344706	0.283	0.143	0.453045	9	Slc8a2
Lztr1	1.86227e-05	-0.382784	0.286	0.429	0.47095	9	Lztr1
Asph	1.92184e-05	-0.322917	0.259	0.408	0.486014	9	Asph
Hmgb3	2.09569e-05	-0.317708	0.061	0.164	0.529979	9	Hmgb3
Cdh81	2.11774e-05	-0.347603	0.244	0.395	0.535555	9	Cdh8
Got21	2.1246e-05	-0.277774	0.517	0.672	0.537289	9	Got2
Scn8a2	2.22161e-05	-0.315531	0.218	0.374	0.561824	9	Scn8a
Tpd52l1	2.43112e-05	0.283763	0.114	0.025	0.614806	9	Tpd52l1
Luzp22	2.47332e-05	0.351523	0.133	0.038	0.625478	9	Luzp2
Samd14	2.50527e-05	-0.251189	0.344	0.513	0.633558	9	Samd14
Vav2	2.54098e-05	-0.323721	0.436	0.571	0.642588	9	Vav2
Psd2	2.56426e-05	0.329009	0.197	0.08	0.648475	9	Psd2
Pgm2l1	2.70441e-05	0.290342	0.275	0.134	0.683919	9	Pgm2l1
Ier52	2.7151e-05	0.395421	0.199	0.084	0.686623	9	Ier5
Gm27048	2.88164e-05	-0.341094	0.09	0.206	0.728738	9	Gm27048
Rpl132	3.09412e-05	0.316476	0.749	0.668	0.782473	9	Rpl13
Slc39a11	3.2074e-05	0.379012	0.38	0.235	0.81112	9	Slc39a11
Hopx3	3.24705e-05	0.349374	0.652	0.563	0.821147	9	Hopx
Otx11	3.2485e-05	-0.283639	0.133	0.265	0.821514	9	Otx1
Mdh2	3.5448e-05	-0.298904	0.561	0.702	0.896445	9	Mdh2
Fdps1	3.65224e-05	0.294016	0.26	0.126	0.923615	9	Fdps
Syt91	3.96542e-05	0.283883	0.842	0.752	1	9	Syt9
Ascl4	4.05181e-05	0.267648	0.173	0.063	1	9	Ascl4
Mtss11	4.05239e-05	0.395918	0.527	0.395	1	9	Mtss1
Cox142	4.06722e-05	-0.292301	0.506	0.664	1	9	Cox14
Paip22	4.30396e-05	-0.269408	0.551	0.672	1	9	Paip2
Pcdh20	4.71158e-05	0.314542	0.16	0.059	1	9	Pcdh20
Prps1	4.86616e-05	-0.308745	0.348	0.504	1	9	Prps1
Dnajc62	5.20309e-05	-0.272714	0.328	0.487	1	9	Dnajc6
Tmx2	5.27972e-05	-0.341902	0.565	0.676	1	9	Tmx2
Ctxn11	5.49325e-05	0.388098	0.316	0.197	1	9	Ctxn1
Vstm2b	5.55233e-05	0.309909	0.545	0.399	1	9	Vstm2b
Vangl13	5.83306e-05	0.33929	0.201	0.092	1	9	Vangl1
Glrb	6.31526e-05	-0.250515	0.332	0.492	1	9	Glrb
Runx1t11	6.37382e-05	-0.300725	0.108	0.227	1	9	Runx1t1
Eif4e31	6.37495e-05	0.353941	0.191	0.084	1	9	Eif4e3
Eid1	6.4373e-05	0.3266	0.749	0.681	1	9	Eid1
Elavl3	6.6927e-05	-0.254417	0.665	0.769	1	9	Elavl3
Sh3bp5	7.38556e-05	-0.258901	0.094	0.206	1	9	Sh3bp5
Gnal1	7.40155e-05	-0.251769	0.335	0.492	1	9	Gnal
Vat11	7.56267e-05	0.341377	0.525	0.391	1	9	Vat1
Dlgap1	7.84832e-05	-0.334226	0.457	0.601	1	9	Dlgap1
Irf2bp21	8.25801e-05	0.268431	0.173	0.067	1	9	Irf2bp2
Anxa6	8.35219e-05	-0.337068	0.288	0.429	1	9	Anxa6
Mgat4a1	8.63545e-05	0.250563	0.136	0.042	1	9	Mgat4a
Pcf11	8.7033e-05	0.331551	0.143	0.05	1	9	Pcf11
Rps161	8.72416e-05	0.285254	0.728	0.647	1	9	Rps16
Neto2	8.87745e-05	0.315771	0.332	0.189	1	9	Neto2
Prpf191	9.00809e-05	-0.317571	0.419	0.555	1	9	Prpf19
Lhfpl41	9.12235e-05	-0.376129	0.41	0.546	1	9	Lhfpl4
Disp21	9.30835e-05	-0.27887	0.382	0.525	1	9	Disp2
Ndrg22	9.97228e-05	0.251608	0.243	0.118	1	9	Ndrg2
Spint2	0.000104949	0.308439	0.257	0.13	1	9	Spint2
Rpl341	0.000112473	0.280712	0.659	0.576	1	9	Rpl34
X1110059G10Rik	0.000112749	-0.293853	0.081	0.185	1	9	X1110059G10Rik
Rpl171	0.000113561	0.305805	0.814	0.731	1	9	Rpl17
Crnde	0.000118446	0.288176	0.104	0.025	1	9	Crnde
Lage3	0.000120724	-0.291218	0.049	0.134	1	9	Lage3
Flrt2	0.000143244	0.254569	0.15	0.055	1	9	Flrt2
Pde4a	0.00014968	-0.312376	0.197	0.29	1	9	Pde4a
Dlg1	0.000150396	0.268823	0.266	0.139	1	9	Dlg1
Srgap3	0.000152923	0.328635	0.205	0.092	1	9	Srgap3
Bmp71	0.000156699	-0.279863	0.321	0.466	1	9	Bmp7
Ubl31	0.000165403	0.301364	0.756	0.697	1	9	Ubl3
Rab6b1	0.00016786	-0.353021	0.355	0.487	1	9	Rab6b
Nhlh23	0.000169857	-0.271761	0.663	0.79	1	9	Nhlh2
Wfikkn21	0.000170062	0.255446	0.111	0.034	1	9	Wfikkn2
Zfand51	0.00017073	0.296449	0.627	0.513	1	9	Zfand5
Ptprs	0.000177211	-0.283388	0.448	0.542	1	9	Ptprs
Atp5h1	0.00018444	0.258836	0.373	0.231	1	9	Atp5h
Naa60	0.00018624	-0.256762	0.351	0.504	1	9	Naa60
Mllt11	0.000195698	-0.283988	0.561	0.697	1	9	Mllt11
Adssl1	0.000199769	0.324551	0.165	0.067	1	9	Adssl1
Pafah1b31	0.000205384	0.293269	0.312	0.181	1	9	Pafah1b3
Rbms11	0.000206054	-0.300669	0.25	0.391	1	9	Rbms1
Ptprd	0.000211812	-0.300112	0.293	0.42	1	9	Ptprd
Bcat1	0.000213686	-0.276185	0.325	0.475	1	9	Bcat1
Nrxn2	0.000218617	-0.293072	0.672	0.761	1	9	Nrxn2
Mesdc21	0.00022708	0.376234	0.371	0.252	1	9	Mesdc2
Nlgn11	0.000230697	0.339193	0.316	0.193	1	9	Nlgn1
Mat2a	0.000235049	-0.298587	0.483	0.601	1	9	Mat2a
Gucy1b32	0.000239115	-0.253835	0.64	0.752	1	9	Gucy1b3
Gabrb1	0.000255777	0.258623	0.152	0.059	1	9	Gabrb1
Smad1	0.00027162	0.272694	0.25	0.13	1	9	Smad1
Tmem178b1	0.000272601	0.39084	0.319	0.206	1	9	Tmem178b
Sema6a	0.000276849	0.275689	0.293	0.168	1	9	Sema6a
Bex22	0.000277794	0.369932	0.581	0.487	1	9	Bex2
Tmsb102	0.000285805	0.319564	0.483	0.391	1	9	Tmsb10
Snrpf2	0.000288892	0.338524	0.403	0.273	1	9	Snrpf
Adam112	0.000291865	-0.286335	0.316	0.441	1	9	Adam11
Celf62	0.000297572	0.266223	0.643	0.521	1	9	Celf6
Rpl51	0.000300968	0.289888	0.702	0.647	1	9	Rpl5
Tmem151b	0.000315303	-0.284148	0.068	0.151	1	9	Tmem151b
Pitpnc1	0.000316864	-0.287051	0.043	0.118	1	9	Pitpnc1
Hspb111	0.000323772	0.320548	0.259	0.151	1	9	Hspb11
Zfand2a	0.000324969	-0.283576	0.104	0.206	1	9	Zfand2a
Thra	0.000332094	-0.260565	0.458	0.597	1	9	Thra
Cetn3	0.000335657	0.389038	0.348	0.239	1	9	Cetn3
Ppa1	0.000343583	0.322564	0.525	0.403	1	9	Ppa1
Slc4a101	0.000367716	-0.254409	0.228	0.345	1	9	Slc4a10
Ncam12	0.000370575	-0.255193	0.681	0.773	1	9	Ncam1
Spop1	0.000373526	-0.256525	0.587	0.693	1	9	Spop
Ralgds1	0.000386023	0.316614	0.191	0.092	1	9	Ralgds
Rnf152	0.000390892	-0.34154	0.087	0.185	1	9	Rnf152
Myadm	0.000401472	0.311597	0.227	0.122	1	9	Myadm
Parva	0.000417255	-0.288929	0.048	0.122	1	9	Parva
Axin1	0.000424012	0.345324	0.22	0.113	1	9	Axin1
Fam149a	0.00044599	-0.281459	0.134	0.223	1	9	Fam149a
Btbd111	0.000482211	0.279508	0.175	0.08	1	9	Btbd11
Nedd4l1	0.000495439	0.3356	0.295	0.172	1	9	Nedd4l
Rgmb1	0.000496015	0.288669	0.173	0.076	1	9	Rgmb
Inpp4b1	0.000513995	0.29968	0.153	0.071	1	9	Inpp4b
Dpysl3	0.000525202	-0.303047	0.25	0.374	1	9	Dpysl3
Msmo12	0.000529791	0.427657	0.36	0.252	1	9	Msmo1
Mtcl1	0.000532944	-0.373407	0.132	0.227	1	9	Mtcl1
Copg1	0.000538695	-0.262707	0.473	0.592	1	9	Copg1
Ago2	0.000543795	0.318436	0.506	0.42	1	9	Ago2
Rps152	0.000547317	0.3019	0.607	0.517	1	9	Rps15
Srebf22	0.000560685	0.291204	0.545	0.408	1	9	Srebf2
Rdh11	0.000594625	0.274519	0.165	0.071	1	9	Rdh11
Dkc1	0.000612168	-0.264571	0.126	0.231	1	9	Dkc1
X2900011O08Rik	0.000657872	0.281049	0.337	0.21	1	9	X2900011O08Rik
Sgsm11	0.000670809	0.289904	0.431	0.349	1	9	Sgsm1
Lrrn3	0.000682148	-0.250824	0.387	0.521	1	9	Lrrn3
Lrrc4c	0.000683948	0.280682	0.473	0.34	1	9	Lrrc4c
Pcca	0.000684285	-0.398321	0.214	0.332	1	9	Pcca
Stard101	0.000704016	-0.303375	0.311	0.441	1	9	Stard10
Cartpt2	0.000782127	0.315269	0.387	0.269	1	9	Cartpt
X2510009E07Rik	0.000791475	-0.289048	0.293	0.395	1	9	X2510009E07Rik
Uqcr10	0.000793444	-0.260349	0.379	0.504	1	9	Uqcr10
Lgi11	0.000798797	-0.273439	0.166	0.277	1	9	Lgi1
Rpa1	0.00081198	0.300006	0.296	0.197	1	9	Rpa1
Atxn7l3	0.000823113	-0.292707	0.243	0.37	1	9	Atxn7l3
Gm94932	0.000842927	0.26095	0.312	0.189	1	9	Gm9493
Rps191	0.000842976	0.273584	0.808	0.739	1	9	Rps19
Adgrg11	0.000863001	0.285552	0.277	0.168	1	9	Adgrg1
Sema6c	0.000977774	-0.310569	0.091	0.176	1	9	Sema6c
Ptbp2	0.00106792	-0.281938	0.199	0.315	1	9	Ptbp2
Cox7b	0.00112272	-0.265401	0.364	0.496	1	9	Cox7b
Tmem65	0.0011478	-0.265938	0.133	0.231	1	9	Tmem65
Dok4	0.00115322	0.359985	0.202	0.113	1	9	Dok4
Pdcd41	0.001262	0.370726	0.37	0.29	1	9	Pdcd4
Son	0.00138016	-0.297685	0.533	0.626	1	9	Son
B230216N24Rik1	0.0013861	0.377349	0.143	0.08	1	9	B230216N24Rik
Zfas13	0.0013923	0.263855	0.605	0.521	1	9	Zfas1
Mif	0.00143915	0.296332	0.447	0.345	1	9	Mif
Wbp5	0.00148899	0.264466	0.71	0.639	1	9	Wbp5
Gng31	0.00149344	-0.263142	0.66	0.756	1	9	Gng3
Hsd3b22	0.0015108	0.257879	0.634	0.534	1	9	Hsd3b2
Wdr83	0.00166809	-0.252018	0.081	0.16	1	9	Wdr83
Mapre1	0.00183412	0.352256	0.353	0.248	1	9	Mapre1
Nrep1	0.0019083	-0.269656	0.231	0.349	1	9	Nrep
Lcorl1	0.00193245	0.26945	0.285	0.181	1	9	Lcorl
Rasgrf11	0.00200461	0.320394	0.218	0.126	1	9	Rasgrf1
Hexim1	0.00201088	0.372373	0.267	0.202	1	9	Hexim1
Pip4k2a	0.00203237	0.31384	0.178	0.092	1	9	Pip4k2a
Parvb1	0.00209389	0.258329	0.267	0.181	1	9	Parvb
Stmn43	0.00217943	0.358243	0.41	0.328	1	9	Stmn4
Chst10	0.0021808	0.260472	0.474	0.357	1	9	Chst10
Ppp1ca	0.00219144	-0.257951	0.341	0.466	1	9	Ppp1ca
Fam155a	0.00224981	0.282503	0.374	0.256	1	9	Fam155a
B230217C12Rik	0.00226712	-0.272127	0.207	0.307	1	9	B230217C12Rik
Irx5	0.00230864	0.287291	0.182	0.092	1	9	Irx5
Tspyl21	0.00234551	0.257518	0.438	0.332	1	9	Tspyl2
Otx21	0.00239008	-0.31272	0.283	0.395	1	9	Otx2
Yeats2	0.00252472	0.26243	0.223	0.126	1	9	Yeats2
Srf	0.00273528	0.285727	0.146	0.071	1	9	Srf
X0610012G03Rik	0.0027373	-0.252553	0.338	0.445	1	9	X0610012G03Rik
Aldh3a2	0.00276131	0.285145	0.24	0.155	1	9	Aldh3a2
Rptor	0.00285142	-0.257947	0.212	0.315	1	9	Rptor
Rasd22	0.00293743	0.299641	0.358	0.248	1	9	Rasd2
Exosc2	0.0032037	0.276269	0.435	0.34	1	9	Exosc2
Trove2	0.00329061	-0.342938	0.275	0.391	1	9	Trove2
Gm86242	0.00331009	0.265062	0.309	0.214	1	9	Gm8624
Lpar12	0.00344498	0.368568	0.127	0.059	1	9	Lpar1
Tusc31	0.00352071	0.274643	0.587	0.496	1	9	Tusc3
Pde1a	0.00366633	-0.266091	0.533	0.647	1	9	Pde1a
Atp8a12	0.00367822	0.290043	0.399	0.307	1	9	Atp8a1
Rps201	0.00374607	0.276722	0.542	0.492	1	9	Rps20
Sema3e1	0.0039655	0.32852	0.314	0.223	1	9	Sema3e
Exoc4	0.00404453	-0.337842	0.217	0.307	1	9	Exoc4
Eef1b21	0.00414932	0.256395	0.678	0.605	1	9	Eef1b2
X2700060E02Rik	0.00443627	0.310846	0.477	0.399	1	9	X2700060E02Rik
Pnrc11	0.00480058	0.295035	0.303	0.223	1	9	Pnrc1
Klhdc10	0.00492386	0.290747	0.41	0.34	1	9	Klhdc10
Zmiz11	0.00494468	0.290801	0.344	0.256	1	9	Zmiz1
Pcbd11	0.00496269	0.262774	0.347	0.252	1	9	Pcbd1
Robo1	0.00505472	0.259246	0.327	0.252	1	9	Robo1
Cables1	0.00514386	0.263567	0.329	0.227	1	9	Cables1
Fhod3	0.0053032	0.306817	0.225	0.147	1	9	Fhod3
Arrdc3	0.00545613	0.269238	0.108	0.046	1	9	Arrdc3
Elf2	0.00554269	0.268648	0.176	0.097	1	9	Elf2
Vma21	0.0056035	-0.294216	0.267	0.37	1	9	Vma21
Glcci1	0.00632512	0.285155	0.249	0.155	1	9	Glcci1
Ypel2	0.0063617	0.256616	0.16	0.088	1	9	Ypel2
Sybu	0.00656562	0.305656	0.335	0.248	1	9	Sybu
Fam96a	0.00685035	0.251238	0.186	0.109	1	9	Fam96a
Pfdn2	0.00690977	0.261347	0.592	0.5	1	9	Pfdn2
Siah1a	0.00740523	0.283714	0.175	0.109	1	9	Siah1a
Tenm31	0.00747982	0.267811	0.201	0.118	1	9	Tenm3
N4bp1	0.00806969	0.297751	0.345	0.269	1	9	N4bp1
Tnik	0.00808247	-0.28019	0.292	0.37	1	9	Tnik
Agfg11	0.00828723	0.254358	0.295	0.202	1	9	Agfg1
Rab15	0.00871293	0.255683	0.301	0.214	1	9	Rab15
Bin1	0.00904644	-0.271556	0.393	0.496	1	9	Bin1
Gnl1	0.0090621	0.257389	0.408	0.34	1	9	Gnl1
Vps4b	0.00932213	0.27805	0.296	0.235	1	9	Vps4b
Hif1a	0.00953505	0.309029	0.249	0.168	1	9	Hif1a
Nckap1	0.00981477	-0.280853	0.403	0.513	1	9	Nckap1
Rpn2	0.00997871	0.325449	0.386	0.324	1	9	Rpn2
Ryr2	0.0102557	-0.308918	0.217	0.29	1	9	Ryr2
Arhgap261	0.0104012	-0.251456	0.29	0.387	1	9	Arhgap26
Ncoa5	0.0118933	0.252851	0.156	0.101	1	9	Ncoa5
Kitl2	0.0133511	-0.261959	0.071	0.126	1	9	Kitl
Chka	0.0139413	0.272753	0.315	0.248	1	9	Chka
Sppl3	0.0147264	-0.263476	0.194	0.269	1	9	Sppl3
Abi2	0.0151215	-0.254457	0.475	0.571	1	9	Abi2
Bnip3	0.0151415	0.27692	0.338	0.273	1	9	Bnip3
Prkca1	0.0164335	-0.26719	0.188	0.273	1	9	Prkca
Naa30	0.0166748	-0.253297	0.137	0.214	1	9	Naa30
Fxr1	0.0170036	0.274874	0.267	0.197	1	9	Fxr1
Grb10	0.0171767	0.258978	0.504	0.429	1	9	Grb10
Plp11	0.0174538	0.500027	0.246	0.16	1	9	Plp1
D10Wsu102e	0.018081	0.265561	0.429	0.357	1	9	D10Wsu102e
Peli1	0.0181095	0.279536	0.325	0.261	1	9	Peli1
Galnt16	0.0189873	0.259746	0.325	0.252	1	9	Galnt16
Eml2	0.0193569	0.2691	0.603	0.546	1	9	Eml2
Snrnp27	0.0199967	-0.338227	0.21	0.298	1	9	Snrnp27
Gltscr1l	0.0200382	0.257112	0.172	0.109	1	9	Gltscr1l
Cpne8	0.0202682	-0.253546	0.247	0.319	1	9	Cpne8
Adgrl1	0.0203611	-0.258917	0.426	0.513	1	9	Adgrl1
Samd4	0.023277	0.259186	0.208	0.134	1	9	Samd4
Snrpa1	0.0234265	0.253212	0.188	0.122	1	9	Snrpa1
[truncated: 18 more rows]
