# Supplementary material for: Anatomical and single-cell transcriptional profiling of the murine habenular complex
Source: eLife. 2020 Feb 11;9:e51271. doi: 10.7554/eLife.51271 (PMC7012610; doi:10.7554/eLife.51271)
Supplement: Supplementary file 4. [file elife-51271-supp4.csv]

gene	MHb	ventral2/3	ventrolateral	lateral	dorsal	superior		LHb	oval/medial	marginal	lateral	HbX
X0610006L08Rik		0	0	0.001	0	0			0.007	0	0	0.014
X0610007P14Rik		0.473	0.509	0.67	0.696	0.75			0.465	0.377	0.805	0.563
X0610009B22Rik		0.551	0.551	0.416	0.361	0.613			0.436	0.187	0.342	0.505
X0610009E02Rik		0.034	0.039	0.024	0.047	0.063			0.036	0.009	0.043	0.021
X0610009L18Rik		0.044	0.035	0.093	0.062	0.021			0.11	0.048	0.093	0.021
X0610009O20Rik		0.135	0.137	0.183	0.177	0.159			0.088	0.051	0.121	0.201
X0610010F05Rik		0.407	0.299	0.187	0.243	0.334			0.566	0.49	0.438	0.28
X0610010K14Rik		0.003	0.011	0.017	0.027	0			0.025	0	0.027	0
X0610011F06Rik		0.567	0.586	0.813	0.82	0.517			1.052	0.547	0.774	0.685
X0610012D04Rik		0.009	0.01	0.003	0.004	0.015			0.023	0	0	0.012
X0610012G03Rik		1.989	1.494	1.38	1.108	1.713			1.262	1.482	1.494	1.506
X0610025J13Rik		0.008	0	0.002	0.003	0			0	0	0	0
X0610030E20Rik		0.068	0.101	0.15	0.081	0.08			0.092	0.126	0.086	0.101
X0610031O16Rik		0.437	0.382	0.387	0.411	0.408			0.383	0.371	0.353	0.582
X0610033M10Rik		0.002	0	0.005	0.006	0.009			0.014	0	0	0
X0610037L13Rik		0.333	0.353	0.316	0.253	0.465			0.286	0.294	0.166	0.29
X0610038B21Rik		0.011	0.025	0.019	0.045	0.015			0.011	0.01	0.012	0
X0610040B10Rik		0.057	0.101	0.077	0.062	0.059			0.029	0.337	0.059	0.08
X0610040F04Rik		0	0.006	0	0.002	0.006			0.013	0.01	0.004	0.011
X0610040J01Rik		0.012	0.009	0.011	0.027	0.015			0	0.032	0.013	0
X0610043K17Rik		0.003	0.006	0.002	0.003	0.011			0	0	0.011	0
X1010001B22Rik		0	0	0	0	0			0	0.043	0	0
X1010001N08Rik		0	0	0.005	0	0			0	0	0.006	0
X1110001J03Rik		0.516	0.448	0.567	0.734	0.714			0.528	1.086	0.808	0.717
X1110002J07Rik		0.009	0.005	0.006	0.008	0			0	0	0.015	0
X1110002L01Rik		0.234	0.261	0.169	0.135	0.259			0.162	0.17	0.223	0.256
X1110002O04Rik		0	0.002	0	0	0			0	0	0	0
X1110004E09Rik		0.307	0.402	0.447	0.469	0.251			0.178	0.281	0.506	0.385
X1110004F10Rik		2.958	2.915	3.013	3.585	3.343			2.27	1.985	2.825	3.19
X1110008F13Rik		2.027	1.778	1.377	1.134	1.684			1.15	1.084	1.348	1.237
X1110008L16Rik		0.034	0.015	0.02	0.043	0.041			0.004	0.01	0.008	0.044
X1110008P14Rik		0.687	0.616	0.628	0.611	0.665			0.575	0.547	0.802	0.688
X1110012L19Rik		0.208	0.202	0.236	0.241	0.213			0.137	0.154	0.302	0.168
X1110017D15Rik		0.034	0.018	0.035	0.038	0.026			0.014	0.058	0	0
X1110018N20Rik		0.109	0.131	0.107	0.069	0.113			0.067	0	0.037	0.04
X1110019D14Rik		0.036	0.021	0.03	0.034	0.017			0.03	0.19	0.092	0.008
X1110020A21Rik		0	0.015	0.015	0.008	0.028			0	0	0.018	0
X1110025L11Rik		0	0.003	0	0	0			0	0	0	0
X1110028F11Rik		0.002	0.003	0	0.001	0			0	0	0	0
X1110028F18Rik		0	0.006	0.014	0.004	0.008			0	0	0	0
X1110032A03Rik		0.665	0.538	0.566	0.511	0.525			0.306	0.076	0.459	0.471
X1110032F04Rik		0.033	0.013	0	0.006	0			0.125	0.392	0.008	0
X1110034G24Rik		0.082	0.061	0.063	0.059	0.031			0.063	0	0.133	0.046
X1110036E04Rik		0.005	0	0.002	0.001	0			0	0	0	0
X1110037F02Rik		0.229	0.433	0.402	0.382	0.316			0.233	0.152	0.388	0.365
X1110038B12Rik		0.122	0.165	0.214	0.408	0.285			0.316	0.236	0.216	0.114
X1110038F14Rik		0.226	0.275	0.345	0.231	0.327			0.128	0.057	0.135	0.153
X1110046J04Rik		0.038	0.04	0.053	0.094	0.041			0.072	0.108	0.073	0.027
X1110051M20Rik		1.248	1.135	1.246	1.012	1.266			1.163	0.908	1.443	1.025
X1110057P08Rik		0	0	0.002	0.001	0			0	0	0	0
X1110059E24Rik		0.31	0.214	0.247	0.333	0.272			0.488	0.465	0.333	0.202
X1110059G10Rik		0.443	0.24	0.237	0.282	0.72			0.342	0.156	0.282	0.229
X1110065P20Rik		0.875	1.008	0.862	0.956	1.009			0.632	0.422	0.912	1.251
X1190002N15Rik		0.628	0.397	0.48	1.606	1.033			0.289	0.19	0.382	0.298
X1190003K10Rik		0	0.003	0	0	0			0	0	0	0
X1190005I06Rik		0.449	0.563	0.61	0.626	0.728			0.036	0.116	0.318	0.501
X1190007I07Rik		0.179	0.147	0.177	0.139	0.144			0.101	0.035	0.275	0.13
X1200007C13Rik		0.003	0	0.01	0.015	0.026			0.01	0	0.043	0
X1300002E11Rik		0.05	0.044	0.081	0.048	0.06			0.014	0.067	0.08	0
X1300017J02Rik		0.004	0.008	0.014	0.007	0.011			0.017	0	0.022	0.013
X1500002F19Rik		0.012	0.006	0.019	0.005	0			0.008	0	0	0
X1500004A13Rik		0.827	1.011	0.887	1.131	1.103			1.237	0.794	1.036	0.824
X1500009C09Rik		2.163	2.062	2.035	1.996	2.274			1.733	2.167	1.927	1.575
X1500009L16Rik		1.069	0.868	0.811	0.594	0.404			0.52	0.442	0.956	0.593
X1500011B03Rik		2.191	2.287	2.682	2.695	2.455			2.562	1.845	2.757	3.071
X1500011K16Rik		0.723	0.895	0.855	0.649	0.77			0.488	0.398	0.728	0.525
X1500012K07Rik		0.012	0.004	0.015	0.003	0.016			0.005	0	0	0
X1500015A07Rik		0.006	0.002	0	0.013	0			0	0	0	0
X1500015L24Rik		0	0	0.002	0	0			0	0	0	0
X1500015O10Rik		0.005	0.007	0.009	0	0			0	0	0.019	0
X1500017E21Rik		0.033	0.023	0.01	0.029	0.009			0.059	0.051	0.023	0.04
X1500026H17Rik		0.014	0.076	0.031	0.063	0.066			0.053	0.066	0.035	0.09
X1500035N22Rik		0.042	0.053	0.074	0.081	0.05			0.04	0	0.104	0.023
X1520401A03Rik		0.014	0.036	0.006	0.01	0.018			0.004	0.133	0.007	0.01
X1600002D24Rik		0	0	0.004	0.001	0			0	0	0	0.006
X1600002H07Rik		0.18	0.213	0.096	0.101	0.062			0.12	0.035	0.15	0.082
X1600002K03Rik		0.101	0.108	0.092	0.12	0.105			0.024	0.1	0.047	0.029
X1600010M07Rik		0.007	0.015	0.011	0.022	0.023			0.024	0	0	0
X1600012H06Rik		0.136	0.115	0.075	0.103	0.078			0.1	0.026	0.029	0.138
X1600012P17Rik		0.005	0.007	0	0.005	0			0	0	0	0
X1600014C10Rik		0.945	0.965	0.644	0.688	0.872			0.636	0.6	0.946	0.989
X1600014C23Rik		0	0.002	0.012	0.002	0.025			0	0	0	0
X1600015I10Rik		0	0.002	0.014	0.008	0			0	0	0	0
X1600019K03Rik		0	0	0	0	0			0	0	0.007	0
X1600020E01Rik		0.141	0.088	0.154	0.156	0.133			0.067	0.165	0.071	0.134
X1600025M17Rik		0.004	0.002	0	0	0			0	0	0	0
X1600029O15Rik		0.009	0.056	0.022	0.083	0.142			0.053	0.016	0.048	0
X1700001C02Rik		0.002	0	0.003	0	0			0.006	0.026	0	0
X1700001C19Rik		0.004	0.01	0.003	0.008	0			0	0	0.008	0
X1700001D01Rik		0	0	0.001	0.004	0.011			0	0	0	0
X1700001F09Rik		0	0.002	0	0	0			0	0	0	0
X1700001G01Rik		0.003	0.012	0.002	0.006	0			0	0	0	0
X1700001G11Rik		0.003	0.008	0.013	0.004	0			0.019	0	0	0.013
X1700001J03Rik		0.006	0.003	0	0	0			0	0	0	0
X1700001J04Rik		0.004	0	0.005	0.004	0			0	0	0	0
X1700001K19Rik		0.002	0.004	0	0.021	0			0	0	0	0
X1700001L05Rik		0.005	0	0.003	0.005	0			0.025	0.014	0	0
X1700001L19Rik		0.015	0.019	0.014	0.073	0.032			0.203	0.072	0.071	0.088
X1700001N15Rik		0.002	0.002	0	0.005	0			0	0	0	0
X1700001O22Rik		0.016	0.003	0.014	0.015	0.012			0.022	0	0.077	0.017
X1700001P01Rik		0	0	0	0.003	0			0	0	0	0
X1700003C15Rik		0	0	0.008	0	0.005			0	0	0	0
X1700003D09Rik		0.006	0	0.007	0.012	0			0	0	0	0
X1700003E16Rik		0.024	0.097	0.259	0.162	0.107			0.185	0.032	0.087	0.072
X1700003E24Rik		0	0	0	0	0			0	0	0	0
X1700003F12Rik		0.005	0.006	0.013	0.002	0			0.024	0	0	0
X1700003G13Rik		0.002	0.011	0	0.004	0			0	0	0	0
X1700003G18Rik		0	0	0	0	0			0	0	0	0
X1700003H04Rik		0.01	0.012	0	0	0			0	0	0.01	0
X1700003I16Rik		0.013	0.023	0.031	0.013	0.005			0.013	0	0.006	0.005
X1700003I22Rik		0	0	0	0	0			0	0	0	0
X1700003L19Rik		0	0	0	0	0			0	0	0	0.014
X1700003M07Rik		0	0.009	0.002	0.002	0.009			0	0.046	0.029	0
X1700003P14Rik		0.002	0	0	0	0			0	0	0	0
X1700006A11Rik		0.001	0.003	0.001	0.006	0			0.008	0	0	0
X1700006E09Rik		0	0	0.002	0	0			0	0	0	0
X1700006F04Rik		0	0	0.003	0	0			0	0	0	0
X1700006H21Rik		0.002	0	0.004	0	0			0	0	0	0
X1700006J14Rik		0.01	0.006	0.005	0.027	0.021			0.004	0.031	0.013	0
X1700007B14Rik		0.006	0.002	0.005	0.006	0.017			0.03	0	0	0.025
X1700007F19Rik		0	0	0.009	0.003	0			0	0	0	0
X1700007G11Rik		0.007	0.017	0.006	0.006	0			0	0.01	0	0.019
X1700007J10Rik		0.031	0.028	0.028	0.035	0.022			0.055	0	0.035	0.012
X1700007K09Rik		0.011	0	0.006	0.002	0			0.006	0	0	0
X1700007K13Rik		0.008	0.03	0.123	0.106	0.013			0.011	0.022	0.043	0.02
X1700007L15Rik		0.065	0.05	0.018	0.065	0.046			0.014	0.009	0.014	0
X1700007M16Rik		0.002	0	0	0.012	0			0	0	0	0.01
X1700007P06Rik		0	0	0.004	0	0			0	0	0	0
X1700008K24Rik		0.002	0.002	0	0	0			0	0	0	0
X1700008O03Rik		0.031	0.029	0.037	0.085	0.006			0.071	0.066	0.046	0.018
X1700008P02Rik		0.005	0	0.004	0	0			0	0	0	0
X1700009C05Rik		0.002	0	0.001	0	0			0	0	0.013	0
X1700009J07Rik		0	0	0	0	0			0	0	0	0
X1700009N14Rik		0	0.037	0.003	0.007	0			0.005	0	0	0.008
X1700010B08Rik		0.002	0	0	0	0			0	0	0	0
X1700010D01Rik		0	0	0	0	0			0	0	0	0
X1700010H22Rik		0.008	0.002	0.001	0	0			0.009	0	0	0
X1700010I02Rik		0.012	0.037	0.034	0.025	0.072			0.063	0.021	0.016	0.055
X1700010I14Rik		0.062	0.014	0.059	0.045	0.015			0	0.009	0	0.041
X1700010J16Rik		0	0	0.002	0	0			0	0	0	0
X1700010K23Rik		0	0	0	0.004	0.005			0	0	0	0
X1700010K24Rik		0.003	0	0.002	0	0			0	0	0	0
X1700010L04Rik		0	0	0	0.001	0			0	0	0	0.007
X1700010N08Rik		0	0	0	0.003	0			0	0	0	0
X1700011B04Rik		0	0.014	0	0	0.009			0	0	0	0
X1700011C11Rik		0	0.004	0	0	0			0	0	0	0
X1700011E24Rik		0.003	0	0.002	0.006	0			0.013	0.015	0.041	0
X1700011H14Rik		0.007	0	0.002	0	0			0	0	0	0.013
X1700011I03Rik		0	0.011	0.002	0.001	0			0.01	0	0	0.015
X1700011L22Rik		0.003	0	0	0	0			0	0	0.01	0
X1700011M02Rik		0	0	0	0	0			0	0	0	0
X1700012A03Rik		0.009	0.002	0	0.002	0.007			0	0	0	0.021
X1700012B07Rik		0	0.002	0.001	0.004	0.007			0	0	0	0.01
X1700012B09Rik		0	0.019	0.002	0.005	0.01			0.017	0	0	0
X1700012C08Rik		0	0	0	0	0			0	0	0	0
X1700012C14Rik		0.003	0.01	0.004	0.003	0			0	0	0.011	0.081
X1700012D16Rik		0	0	0	0	0			0	0	0	0
X1700012E03Rik		0	0.004	0.002	0	0			0	0	0	0
X1700012I11Rik		0.002	0.002	0	0.001	0			0	0	0	0
X1700012L04Rik		0	0	0	0	0			0	0	0	0
X1700012P22Rik		0.002	0	0	0	0			0	0	0	0
X1700013D24Rik		0	0	0	0.004	0			0	0	0	0
X1700013F07Rik		0.006	0.005	0.008	0.014	0			0	0	0.04	0
X1700013G24Rik		0	0.003	0	0.002	0			0	0	0	0
X1700013H16Rik		0.002	0	0	0	0			0.005	0	0	0
X1700014D04Rik		0.006	0.004	0	0.004	0			0	0	0	0
X1700014F14Rik		0	0	0.004	0	0			0	0	0	0.011
X1700015E13Rik		0	0	0.001	0	0.006			0	0	0	0
X1700015F17Rik		0	0.013	0.003	0.002	0.02			0.015	0.015	0	0.027
X1700015G11Rik		0	0	0	0	0			0	0	0	0
X1700015O11Rik		0	0	0.001	0.025	0			0	0	0	0
X1700016C15Rik		0	0.003	0.002	0	0			0	0	0	0
X1700016D06Rik		0.032	0.004	0.009	0.017	0.013			0.015	0.017	0.007	0.013
X1700016F12Rik		0.002	0	0.002	0	0			0	0	0	0
X1700016G14Rik		0	0	0.002	0	0.013			0	0	0	0.009
X1700016G22Rik		0.006	0	0	0.003	0			0.014	0	0.008	0
X1700016H13Rik		0	0.003	0.002	0	0			0	0	0	0.007
X1700016K19Rik		0	0.017	0.023	0.003	0			0	0	0.021	0
X1700016L21Rik		0	0	0	0	0			0	0	0	0
X1700016P03Rik		0	0	0.012	0.002	0.01			0	0.023	0	0.015
X1700016P04Rik		0.002	0.003	0.003	0	0			0	0	0	0
X1700017B05Rik		0.023	0.063	0.107	0.102	0.066			0.038	0.02	0.065	0.224
X1700017D01Rik		0.04	0.063	0.039	0.038	0.078			0.047	0.028	0	0.03
X1700017G19Rik		0.002	0	0	0.004	0			0	0	0.032	0
X1700017I07Rik		0	0	0.002	0.001	0			0	0	0	0
X1700017J07Rik		0	0	0	0	0			0	0	0	0
X1700017L05Rik		0	0	0.003	0	0			0	0.023	0	0
X1700017N19Rik		0.004	0	0	0	0			0	0	0	0
X1700018A04Rik		0.002	0.01	0.007	0.002	0.016			0	0	0.006	0
X1700018B08Rik		0	0.005	0.002	0.004	0			0	0	0	0
X1700018B24Rik		0	0	0.004	0	0			0	0	0	0
X1700018C11Rik		0	0.001	0	0.002	0			0	0	0	0
X1700018F24Rik		0	0	0	0.008	0			0	0	0	0
X1700019A02Rik		0.006	0.008	0	0	0			0	0	0	0
X1700019B21Rik		0	0.003	0.003	0.004	0.005			0	0	0	0.019
X1700019D03Rik		1.345	1.177	0.404	0.181	0.144			0.604	0.562	0.513	0.21
X1700019E08Rik		0.005	0	0.001	0.002	0			0	0	0	0.012
X1700019G24Rik		0	0	0	0	0			0	0	0	0
X1700019N19Rik		0	0	0.002	0	0			0	0	0.007	0
X1700019O17Rik		0	0	0	0.003	0			0	0	0	0
X1700019P21Rik		0	0	0.001	0	0			0	0	0	0
X1700020A23Rik		0	0	0	0	0			0	0	0.008	0
X1700020D05Rik		0	0	0.007	0.011	0			0	0	0	0.015
X1700020G17Rik		0.005	0.004	0.007	0.009	0			0.006	0.019	0.011	0
X1700020I14Rik		1.691	1.123	0.511	0.545	0.923			1.577	1.035	0.596	0.675
X1700020L24Rik		0.008	0.002	0.043	0	0			0	0	0	0.031
X1700020M21Rik		0	0.005	0.001	0.004	0			0	0.019	0.016	0
X1700020N01Rik		0	0	0.001	0.007	0			0.013	0	0.012	0.007
X1700020N15Rik		0	0	0	0	0			0	0	0	0
X1700020N18Rik		0.006	0	0	0	0			0	0	0	0
X1700021A07Rik		0	0	0.002	0	0			0	0	0.027	0
X1700021F05Rik		0.159	0.244	0.168	0.114	0.114			0.254	0.173	0.227	0.198
X1700021F07Rik		0.003	0	0.002	0	0			0	0	0	0
X1700021F13Rik		0	0	0	0	0			0.01	0	0	0
X1700021J08Rik		0.001	0	0.004	0	0			0	0	0	0
X1700021L23Rik		0.006	0.006	0.003	0.001	0			0	0	0	0.045
X1700021N21Rik		0	0	0.003	0	0			0	0	0	0
X1700021P04Rik		0	0	0	0	0			0	0	0	0
X1700022A21Rik		0	0	0.002	0.001	0			0.027	0	0	0
X1700022A22Rik		0	0	0	0	0			0	0	0	0.033
X1700022E09Rik		0	0	0	0	0			0	0	0	0
X1700022H16Rik		0	0	0	0	0			0	0	0	0
X1700022I11Rik		0.017	0.018	0.001	0.006	0			0	0.028	0	0.014
X1700022N22Rik		0	0	0.005	0.002	0			0.005	0	0	0
X1700023C21Rik		0.002	0	0	0	0			0	0	0	0
X1700023F02Rik		0	0	0	0	0			0	0	0.008	0
X1700023F06Rik		0.01	0.011	0.028	0.013	0.012			0.026	0.019	0.058	0
X1700023G09Rik		0.005	0	0.006	0.009	0			0.01	0	0	0
X1700023H06Rik		0	0.003	0	0.004	0			0.014	0.114	0	0
X1700024B05Rik		0.002	0	0	0.002	0			0	0	0	0
X1700024B18Rik		0	0	0	0	0			0	0	0	0
X1700024G13Rik		0	0.016	0.001	0.002	0			0	0	0	0
X1700024P04Rik		0.003	0	0	0	0			0	0	0	0
X1700024P16Rik		0.002	0.002	0.002	0	0			0.014	0	0.014	0.022
X1700025B11Rik		0.002	0	0	0	0			0.004	0	0	0
X1700025C18Rik		0.002	0.002	0.003	0	0			0.015	0	0	0
X1700025D23Rik		0.004	0	0.001	0	0			0	0	0	0
X1700025F22Rik		0.002	0	0.006	0	0			0	0.032	0.019	0
X1700025F24Rik		0	0.002	0.001	0	0			0	0	0	0
X1700025G04Rik		0.322	0.336	0.431	0.656	0.306			0.734	0.504	0.268	0.262
X1700025H01Rik		0	0.004	0.002	0	0			0	0	0.008	0.019
X1700025J12Rik		0	0.023	0.006	0.002	0.007			0	0.032	0	0
X1700025K24Rik		0.005	0	0.003	0	0.022			0	0	0	0.01
X1700025M24Rik		0.003	0	0	0	0			0	0	0	0
X1700025N21Rik		0	0	0	0.009	0			0	0	0	0
X1700025N23Rik		0.007	0.018	0.011	0.008	0.01			0.025	0.152	0	0.021
X1700025O08Rik		0	0	0	0	0			0	0	0	0
X1700026D11Rik		0.004	0.005	0.01	0.016	0			0.01	0	0	0.014
X1700026F02Rik		0	0	0	0	0			0	0	0	0
X1700026J12Rik		0	0	0.019	0	0			0	0	0.01	0
X1700026J14Rik		0.004	0	0	0.004	0.006			0.019	0	0	0
X1700027A07Rik		0.005	0.003	0.003	0.009	0			0	0	0	0
X1700027A15Rik		0	0	0	0	0			0.008	0	0	0
X1700027F06Rik		0	0	0	0	0.01			0	0	0	0
X1700027F09Rik		0	0.008	0.004	0.002	0			0	0	0	0
X1700027H10Rik		0.006	0.005	0.001	0.004	0.008			0.005	0	0	0
X1700027I24Rik		0	0	0.002	0.009	0			0	0	0	0
X1700028B04Rik		0.022	0.03	0.022	0.027	0			0.026	0.067	0.014	0.005
X1700028D13Rik		0	0.003	0.002	0.004	0			0	0	0.014	0
X1700028E10Rik		0.046	0.053	0.055	0.023	0.035			0.031	0.022	0.092	0.022
X1700028I16Rik		0.006	0.004	0.002	0.004	0			0	0	0	0
X1700028J19Rik		0.002	0.009	0	0.004	0			0	0	0.011	0
X1700028K03Rik		0.136	0.117	0.108	0.048	0.039			0.023	0.024	0.132	0.116
X1700028M03Rik		0	0	0.003	0.005	0			0	0	0.012	0
X1700028N14Rik		0.005	0	0.002	0.002	0			0.013	0.041	0	0.027
X1700028P14Rik		0.01	0.02	0.044	0.001	0.041			0	0	0.007	0
X1700028P15Rik		0.011	0.016	0	0.013	0			0	0.016	0	0
X1700029B22Rik		0.002	0	0.005	0	0			0.008	0	0.006	0
X1700029E06Rik		0	0.006	0.012	0.004	0			0	0	0	0
X1700029F12Rik		0	0.008	0.002	0	0			0	0	0	0
X1700029H14Rik		0	0.005	0	0.001	0			0	0	0	0
X1700029I15Rik		0.034	0.011	0.002	0.007	0			0.02	0	0.011	0
X1700029J03Rik		0.004	0	0	0.002	0			0	0	0	0
X1700029J07Rik		0.017	0.044	0.054	0.063	0.059			0.137	0.06	0.069	0.028
X1700029M03Rik		0	0	0	0	0			0	0	0	0
X1700029M20Rik		0	0.008	0.004	0.002	0			0	0	0	0.015
X1700029N11Rik		0	0	0.002	0	0.005			0	0.027	0.004	0
X1700029P11Rik		0.002	0.004	0.005	0	0			0	0.035	0	0
X1700030A11Rik		0.007	0.002	0.004	0.009	0.006			0	0	0.012	0
X1700030C10Rik		0.015	0.041	0.025	0.018	0			0.043	0.054	0.045	0
X1700030C12Rik		0	0	0.006	0	0			0	0.022	0	0.021
X1700030C14Rik		0.005	0.02	0.045	0.011	0.042			0	0	0.01	0
X1700030F04Rik		0	0	0	0	0			0	0	0	0
X1700030J22Rik		0.022	0.014	0.072	0.024	0.009			0.065	0	0	0.025
X1700030K09Rik		0.112	0.216	0.109	0.132	0.117			0.069	0	0.104	0.045
X1700030L20Rik		0.002	0	0.002	0	0			0	0	0	0
X1700030M09Rik		0	0.003	0	0.003	0			0.011	0.009	0	0
X1700030N03Rik		0.033	0.013	0.01	0.014	0.026			0.025	0.05	0.021	0.02
X1700030O20Rik		0.002	0	0.001	0.013	0			0	0	0.006	0
X1700031A10Rik		0	0	0	0.004	0.036			0	0	0.014	0
X1700031F05Rik		0.003	0.002	0	0.004	0			0	0	0	0
X1700031F10Rik		0	0	0	0	0			0	0	0	0
X1700031L13Rik		0	0	0.004	0.001	0			0.004	0	0	0
X1700031M16Rik		0.002	0.007	0	0.011	0			0	0	0	0
X1700031P21Rik		0.006	0.002	0.006	0.032	0			0.005	0	0	0.009
X1700034B16Rik		0	0.002	0	0	0			0	0	0	0.016
X1700034E13Rik		0.002	0	0	0	0			0	0	0	0
X1700034G24Rik		0.003	0	0	0	0			0	0	0	0
X1700034H15Rik		0.003	0.001	0.005	0.002	0			0	0	0	0
X1700034I23Rik		0.008	0.006	0.001	0.027	0.007			0	0	0.011	0.006
X1700034J05Rik		0.006	0.015	0.005	0.013	0			0.02	0.022	0.008	0
X1700034K08Rik		0.003	0.002	0	0.006	0			0	0	0	0
X1700034O15Rik		0.004	0.003	0	0.006	0			0	0	0	0.008
X1700034P13Rik		0.013	0.014	0.02	0.023	0.036			0	0.038	0.025	0
X1700036A12Rik		0.002	0.013	0.031	0.007	0.055			0.023	0	0	0.024
X1700036G14Rik		0	0	0.002	0	0			0	0	0.004	0
X1700036O09Rik		0.002	0	0	0	0			0	0	0	0
X1700037C18Rik		0.07	0.166	0.095	0.098	0.057			0.108	0.101	0.119	0.076
X1700037F24Rik		0.005	0	0	0	0.006			0	0	0	0
X1700037H04Rik		0.371	0.385	0.746	0.631	0.479			1.038	0.908	0.933	0.975
X1700039E15Rik		0	0.002	0.001	0	0			0.01	0	0	0
X1700039E22Rik		0	0	0.003	0	0			0.006	0	0	0
X1700039M10Rik		0	0	0	0	0.007			0.007	0	0	0
X1700039M15Rik		0	0	0.002	0.004	0			0	0	0	0.015
X1700040D17Rik		0.023	0.022	0.02	0.015	0.01			0.052	0.102	0.019	0
X1700040F17Rik		0.006	0	0.002	0	0			0	0	0	0
X1700040L02Rik		0	0.003	0.015	0.003	0			0.005	0.009	0.009	0
X1700040L08Rik		0	0	0	0	0			0	0	0	0
X1700041C23Rik		0	0	0	0	0			0	0	0	0
X1700041G16Rik		0.007	0	0.016	0.019	0.026			0	0	0	0
X1700041M05Rik		0	0	0	0	0			0	0	0	0
X1700041M19Rik		0	0	0.003	0.008	0			0.006	0	0	0
X1700042D02Rik		0	0	0	0	0			0	0	0.013	0
X1700042G07Rik		0.006	0.007	0.003	0.01	0			0.022	0	0	0
X1700042G15Rik		0	0	0.002	0	0			0	0	0	0
X1700042O10Rik		0	0	0.005	0	0			0	0	0	0
X1700044C05Rik		0.003	0.003	0.009	0	0			0.016	0	0	0.032
X1700044K03Rik		0	0	0.002	0	0			0	0	0.006	0.007
X1700045H11Rik		0.002	0.002	0	0	0			0	0	0	0
X1700046C09Rik		0.003	0	0.001	0.003	0			0.015	0	0	0
X1700047A11Rik		0.002	0	0	0	0			0	0	0	0
X1700047F07Rik		0.003	0	0	0.006	0			0	0	0	0
X1700047G03Rik		0	0	0	0.004	0			0	0	0	0
X1700047I17Rik2		0.063	0.18	0.034	0.049	0.038			0.045	0	0.028	0.03
X1700047K16Rik		0.002	0	0.002	0	0			0	0	0	0
X1700047L14Rik		0	0	0	0.002	0			0	0	0	0
X1700047M11Rik		0.009	0.011	0.015	0.012	0.006			0	0	0	0
X1700048F04Rik		0	0.002	0.002	0.004	0			0	0	0	0
X1700048M11Rik		0	0	0	0	0			0	0	0	0
X1700048O20Rik		0.081	0.127	0.094	0.133	0.178			0.11	0.009	0.153	0.096
X1700049E15Rik		0	0.01	0	0	0			0	0	0.008	0
X1700049E17Rik1		0	0.007	0.001	0.024	0			0	0	0	0
X1700049E22Rik		0.003	0	0.003	0	0			0	0	0	0
X1700049G17Rik		0.064	0.096	0.087	0.112	0.068			0.052	0.201	0.044	0.13
X1700049J03Rik		0	0	0	0	0			0.018	0	0	0
X1700051A21Rik		0.021	0.019	0.012	0.006	0			0.043	0.042	0	0.038
X1700052I22Rik		0	0	0	0	0			0	0	0.007	0
X1700054A03Rik		0.003	0.003	0	0.016	0			0	0	0.013	0
X1700054K19Rik		0	0	0	0	0			0	0	0	0.01
X1700054M17Rik		0	0.002	0	0.004	0			0	0	0	0
X1700055C04Rik		0	0	0.002	0	0			0	0	0.006	0
X1700056E22Rik		0.002	0	0.003	0.002	0			0	0	0.012	0
X1700056N10Rik		0.023	0.02	0.021	0.027	0.005			0.02	0.014	0.017	0
X1700057G04Rik		0.006	0.005	0.008	0.002	0			0	0	0.007	0.01
X1700057H15Rik		0	0	0.002	0	0			0	0	0	0
X1700057H21Rik		0	0	0.008	0.003	0			0	0	0	0
X1700058P15Rik		0	0	0	0	0			0	0	0	0
X1700060C16Rik		0	0	0	0	0			0	0	0	0
X1700060C20Rik		0.006	0.002	0.006	0.004	0			0	0	0.011	0.01
X1700060J05Rik		0.005	0.003	0	0	0			0	0	0	0
X1700060O08Rik		0	0	0	0.004	0			0	0	0	0
X1700061E17Rik		0.006	0.005	0.002	0.005	0.005			0.008	0.059	0	0
X1700061E18Rik		0	0	0	0	0			0	0	0	0
X1700061F12Rik		0	0	0.003	0.006	0			0	0	0	0
X1700061G19Rik		0.003	0	0	0.007	0			0	0	0.016	0.01
X1700061H18Rik		0	0	0.002	0.003	0			0	0	0.014	0
X1700061I17Rik		0	0	0.001	0.001	0			0	0	0	0
X1700061J23Rik		0.001	0	0	0	0			0.006	0	0	0
X1700063A18Rik		0	0.016	0.004	0.001	0.006			0	0	0.012	0
X1700063D05Rik		0.032	0.036	0.032	0.047	0.038			0.04	0	0.008	0
X1700063H04Rik		0	0	0	0	0			0	0	0	0
X1700063H06Rik		0	0.004	0	0	0			0	0	0	0
X1700063K16Rik		0.005	0	0	0.004	0			0	0	0	0.012
X1700063O14Rik		0	0	0	0	0			0	0.023	0	0
X1700064H15Rik		0	0	0	0	0			0	0	0	0
X1700064J06Rik		0.002	0	0.001	0	0			0	0	0	0
X1700064M15Rik		0.003	0.002	0.032	0.025	0			0.004	0	0	0.033
X1700065D16Rik		0.003	0.007	0.006	0.006	0			0.01	0	0.028	0
X1700065I16Rik		0	0.002	0.001	0.004	0.009			0	0	0	0.006
X1700065J11Rik		0	0	0	0	0			0	0	0	0
X1700065L07Rik		0	0.012	0.003	0	0			0	0	0	0
X1700065O20Rik		0	0	0	0	0			0	0	0	0
X1700066B17Rik		0	0	0	0	0			0	0	0	0
X1700066B19Rik		0.002	0.031	0.007	0.015	0.013			0	0	0.017	0.033
X1700066C05Rik		0	0	0	0	0.011			0	0	0	0
X1700066J03Rik		0	0	0.001	0	0			0	0	0	0
X1700066M21Rik		0.105	0.043	0.067	0.111	0.058			0.245	0.098	0.099	0.105
X1700066N21Rik		0	0.004	0.009	0	0			0	0	0	0
X1700066O22Rik		0.004	0.01	0.003	0.008	0			0	0.028	0	0.015
X1700067G17Rik		0	0	0.001	0	0			0	0	0	0
X1700067K01Rik		0.003	0.002	0.003	0	0			0	0	0	0.01
X1700067P10Rik		0	0	0	0	0			0	0	0	0
X1700069L16Rik		0	0.003	0.002	0.006	0			0	0	0.007	0
X1700069P05Rik		0	0	0.006	0.015	0			0	0	0	0
X1700071G01Rik		0	0	0	0.003	0			0	0	0	0
X1700071M16Rik		0.005	0	0.006	0.021	0.013			0.004	0	0.013	0
X1700072B07Rik		0	0	0	0	0			0	0	0	0
X1700072G22Rik		0.001	0	0.002	0	0			0	0	0	0
X1700073E17Rik		0.314	0.281	0.352	0.484	0.509			0.217	0.118	0.388	0.453
X1700074H08Rik		0	0	0	0	0			0	0	0	0
X1700074P13Rik		0.002	0	0.005	0.003	0			0	0	0	0
X1700080E11Rik		0	0	0.001	0.003	0			0	0	0	0
X1700080G11Rik		0	0	0.002	0	0			0	0	0	0
X1700080N15Rik		0.002	0	0.001	0.001	0			0	0	0	0
X1700080O16Rik		0	0	0	0.002	0			0.007	0	0.012	0.011
X1700081H04Rik		0.005	0	0.001	0	0			0	0	0	0
X1700082M22Rik		0.005	0.041	0.049	0.027	0			0.013	0.036	0	0.011
X1700083H02Rik		0.002	0.002	0	0.022	0			0	0	0	0
X1700084C06Rik		0.013	0	0.011	0.009	0			0.017	0	0.008	0
X1700084F23Rik		0	0.006	0.002	0	0			0	0	0	0.015
X1700084M14Rik		0	0	0.002	0.003	0			0	0.021	0	0
X1700085C21Rik		0	0	0.002	0.003	0			0.009	0	0	0
X1700086D15Rik		0	0	0	0.003	0			0.004	0	0	0.019
X1700086L19Rik		0	0.034	0.126	0.069	0			0.039	0.03	0.139	0.015
X1700086O06Rik		0.068	0.06	0.092	0.166	0.168			0.067	0.038	0.075	0.053
X1700086P04Rik		0.016	0.026	0.032	0.054	0.015			0.016	0	0.06	0
X1700087M22Rik		0	0	0	0.001	0			0	0	0	0
X1700088E04Rik		0.145	0.168	0.254	0.189	0.133			0.064	0.133	0.109	0.168
X1700091H14Rik		0.005	0.002	0.007	0	0			0	0.155	0.008	0
X1700092C02Rik		0	0	0	0	0			0	0	0	0
X1700092C10Rik		0.002	0	0.002	0	0			0	0	0	0
X1700092C17Rik		0	0	0.001	0	0			0	0	0	0
X1700092E19Rik		0.027	0.026	0.023	0.018	0			0	0	0	0.174
X1700092K14Rik		0.002	0	0.001	0	0			0.007	0	0.006	0
X1700092M07Rik		0	0.007	0.008	0.003	0			0	0	0.02	0
X1700093J21Rik		0.003	0	0.003	0.011	0.016			0.021	0	0	0
X1700093K21Rik		0.003	0.003	0.003	0.001	0			0	0	0.008	0
X1700094J05Rik		0	0	0	0.002	0			0	0.021	0	0
X1700094M24Rik		0	0	0	0	0			0	0	0.008	0
X1700095A13Rik		0.002	0.001	0.001	0.002	0.014			0	0	0	0
X1700095A21Rik		0.002	0	0	0	0			0	0	0	0
X1700095B10Rik		0.006	0	0	0.004	0			0	0	0	0
X1700095J03Rik		0.01	0.005	0.011	0.057	0.006			0.009	0.025	0.077	0.013
X1700095J07Rik		0.116	0.183	0.101	0.181	0.129			0.191	0.045	0.187	0.167
X1700095J12Rik		0.002	0	0.002	0.008	0			0.021	0	0	0
X1700095K22Rik		0	0	0	0	0			0	0	0	0
X1700096J18Rik		0.002	0	0	0.003	0			0	0	0	0
X1700099I09Rik		0.002	0	0	0	0			0	0	0	0
X1700100L14Rik		0	0	0.005	0.002	0			0	0	0.007	0
X1700101I11Rik		0.027	0.021	0.007	0.032	0.037			0.036	0.059	0.017	0.03
X1700101O22Rik		0	0	0	0	0			0	0	0	0.007
X1700102P08Rik		0.027	0.078	0.113	0.078	0.026			0.026	0.252	0.065	0.015
X1700104B16Rik		0	0.003	0.009	0.003	0			0	0	0	0.008
X1700108F19Rik		0	0	0.011	0	0			0	0	0.015	0
X1700108J01Rik		0.008	0.002	0.003	0.007	0			0	0	0.016	0.009
X1700108N11Rik		0	0.003	0	0	0.013			0.013	0	0	0
X1700109G14Rik		0	0	0.001	0.003	0			0	0	0	0
X1700109G15Rik		0	0.004	0	0	0			0	0	0.011	0
X1700109H08Rik		0.125	0.047	0.078	0.065	0.058			0.028	0.079	0.038	0.031
X1700109I08Rik		0	0	0.001	0	0.004			0.007	0	0.004	0
X1700109K24Rik		0	0	0.001	0.003	0			0	0	0	0
X1700110C19Rik		0	0.002	0	0.001	0			0	0	0	0
X1700110I01Rik		0.005	0	0.002	0.004	0			0	0	0	0
X1700110K17Rik		0.003	0	0	0	0.008			0	0	0	0
X1700111E14Rik		0.01	0	0	0	0.013			0	0	0	0
X1700111N16Rik		0.013	0.002	0.014	0	0			0	0	0	0.029
X1700112D23Rik		0.005	0	0.012	0.005	0			0.02	0	0	0
X1700112E06Rik		0.006	0.002	0.005	0	0			0	0.061	0	0
X1700112H15Rik		0	0	0	0	0.009			0	0	0	0
X1700112J05Rik		0	0	0.003	0	0			0	0.01	0	0
X1700112J16Rik		0.026	0.035	0.057	0.045	0.052			0.044	0.05	0.032	0.05
X1700112K13Rik		0	0.002	0	0	0			0	0	0	0
X1700113A16Rik		0.04	0.014	0.034	0.004	0.063			0.006	0.038	0	0.009
X1700113H08Rik		0	0	0.002	0	0			0	0	0	0
X1700116B05Rik		0.003	0	0.001	0	0			0	0	0.008	0
X1700119I11Rik		0	0	0	0	0			0	0	0	0
X1700120B22Rik		0	0	0	0	0			0	0	0	0.007
X1700120C14Rik		0.019	0.009	0.013	0.008	0.046			0.006	0.017	0.029	0
X1700120C18Rik		0.002	0	0.002	0.002	0			0	0	0	0.01
X1700120G07Rik		0.005	0.002	0	0.003	0.006			0	0	0.006	0
X1700120G11Rik		0	0	0	0.001	0			0	0	0	0
X1700120O09Rik		0	0.002	0	0.002	0.009			0	0	0	0.006
X1700121L03Rik		0.004	0.002	0	0	0			0.019	0	0	0
X1700121L16Rik		0	0.002	0	0.003	0			0.011	0	0	0
X1700121N20Rik		0	0	0	0	0			0	0	0	0
X1700122D07Rik		0.011	0.008	0.009	0.006	0			0	0.023	0.026	0
X1700122E12Rik		0	0.001	0.001	0.001	0			0	0	0	0
X1700122O11Rik		0.002	0	0.001	0.004	0			0	0	0	0
X1700123I01Rik		0	0.002	0.006	0	0			0	0	0	0
X1700123K08Rik		0	0.002	0	0	0			0	0	0	0
X1700123L14Rik		0.009	0.019	0.007	0.001	0.006			0.026	0.022	0.023	0.012
X1700123M08Rik		0	0.013	0.006	0.002	0.041			0.039	0	0.021	0
X1700123O12Rik		0.002	0	0	0.001	0			0.018	0	0	0
X1700123O20Rik		0.448	0.398	0.336	0.291	0.409			0.177	0.082	0.375	0.655
X1700123O21Rik		0.002	0	0	0	0			0.011	0	0	0
X1700124L16Rik		0.03	0.016	0.035	0.053	0.029			0.058	0	0.044	0.009
X1700125G02Rik		0	0	0	0	0			0	0	0	0
X1700125G22Rik		0.002	0	0	0.008	0			0	0	0	0
X1700125H03Rik		0	0	0	0.003	0			0	0	0	0
X1700125H20Rik		0.004	0	0.001	0.002	0			0.009	0	0	0
X1700126G02Rik		0.022	0	0.002	0.007	0			0	0	0	0
X1700126H18Rik		0	0	0	0	0			0	0	0	0
X1700128A07Rik		0.003	0	0.003	0.002	0.006			0	0	0	0
X1700128E19Rik		0.002	0	0.001	0.005	0			0	0	0	0
X1700128F08Rik		0.002	0.006	0.003	0.003	0			0	0	0	0
X1700129C05Rik		0	0	0.002	0	0			0	0	0	0
X1700129L04Rik		0	0.003	0.002	0.004	0			0	0	0	0
X1810006J02Rik		0.006	0.011	0.005	0.023	0			0.01	0	0	0
X1810007C17Rik		0	0	0	0	0.008			0	0	0.004	0
X1810007D17Rik		0.002	0	0.004	0	0.01			0	0	0	0
X1810008B01Rik		0	0.002	0.003	0	0			0	0	0.013	0
X1810009A15Rik		0.187	0.201	0.173	0.31	0.324			0.088	0.149	0.283	0.373
X1810009J06Rik		0	0	0	0	0			0	0	0	0
X1810010H24Rik		0.07	0.078	0.036	0.055	0.082			0.146	0.018	0.135	0.201
X1810010K12Rik		0.003	0.002	0.003	0.019	0			0	0	0	0
X1810011H11Rik		0	0.011	0.011	0.008	0			0	0	0	0.006
X1810011O10Rik		0.006	0.002	0.016	0	0			0	0	0	0
X1810012K08Rik		0	0	0	0	0			0	0	0	0
X1810012K16Rik		0	0	0	0.001	0			0	0	0	0
X1810013L24Rik		0.409	0.521	0.467	0.4	0.308			0.425	0.254	0.513	0.263
X1810014B01Rik		0.013	0.011	0.009	0.014	0.015			0	0	0	0
X1810018F18Rik		0.004	0.005	0.001	0.003	0			0	0	0	0
X1810019D21Rik		0.002	0.004	0.012	0.014	0			0	0	0	0.023
X1810019N24Rik		0.037	0.004	0.011	0.007	0.016			0	0	0	0.01
X1810020O05Rik		0	0.008	0.005	0.003	0			0.032	0.018	0.016	0.006
X1810021B22Rik		0.02	0.026	0.019	0.01	0.02			0.038	0	0.015	0.019
X1810022K09Rik		0.283	0.364	0.496	0.652	0.521			0.605	0.759	0.299	0.377
X1810024B03Rik		0.011	0.011	0.027	0.02	0.006			0.033	0	0.012	0
X1810026B05Rik		0.455	0.568	0.639	0.798	0.668			0.162	0.504	0.603	0.396
X1810026J23Rik		0.74	0.788	0.811	0.874	0.898			0.68	0.654	1.237	1.258
X1810030O07Rik		0.304	0.233	0.256	0.228	0.243			0.394	0.105	0.254	0.213
X1810032O08Rik		0.146	0.118	0.213	0.333	0.114			0.051	0.103	0.085	0.104
X1810034E14Rik		0.002	0.004	0.002	0.001	0			0.019	0	0	0
X1810037I17Rik		0.979	0.938	0.827	1.315	1.129			0.777	0.943	1.414	1.232
X1810041H14Rik		0.005	0.002	0.018	0.007	0.007			0.008	0	0.006	0.024
X1810041L15Rik		7.525	7.302	6.41	5.291	1.802			3.119	5.415	5.988	13.533
X1810043G02Rik		0.299	0.382	0.395	0.401	0.258			0.382	0.199	0.437	0.377
X1810043H04Rik		0.467	0.493	0.482	0.444	0.572			0.476	0.157	0.49	0.624
X1810044D09Rik		0.005	0.004	0.038	0.015	0.022			0.006	0	0.006	0
X1810046K07Rik		0.005	0	0	0	0			0	0	0	0
X1810049J17Rik		0	0.016	0	0	0			0	0	0	0
X1810053B23Rik		0.005	0.01	0.002	0.014	0			0.004	0	0.027	0
X1810055G02Rik		0.095	0.106	0.064	0.059	0.064			0.04	0.198	0.029	0.176
X1810058I24Rik		0.142	0.206	0.197	0.203	0.128			0.17	0.13	0.245	0.134
X1810059C17Rik		0.008	0	0.002	0.004	0			0	0	0	0
X1810059H22Rik		0.07	0.108	0.125	0.074	0.011			0.046	0.036	0.077	0.059
X1810062G17Rik		0.002	0	0.009	0.001	0			0	0	0	0
X1810062O18Rik		0.049	0.023	0.018	0.013	0.024			0.02	0	0.039	0.014
X1810063I02Rik		0	0	0	0	0			0	0	0	0
X1810064F22Rik		0.018	0.013	0.029	0.034	0.09			0.02	0	0.067	0.027
X1810065E05Rik		0	0	0.005	0	0.013			0	0	0	0
X2010001A14Rik		0.09	0.077	0.083	0.093	0.103			0.055	0.016	0.162	0.101
X2010003K11Rik		0	0.004	0	0	0			0	0	0	0
X2010005H15Rik		0.002	0.006	0.008	0.003	0			0	0	0	0
X2010007H06Rik		0.024	0.002	0.01	0.005	0.035			0.05	0	0.007	0.013
X2010009K17Rik		0.002	0.007	0	0.001	0			0	0	0	0
X2010010A06Rik		0	0	0.003	0.011	0.01			0	0	0	0
X2010013B24Rik		0	0.011	0	0	0			0	0	0	0
X2010015M23Rik		0.14	0.193	0.139	0.208	0.191			0.232	0.17	0.279	0.134
X2010016I18Rik		0	0.014	0	0.004	0			0	0	0	0
X2010103J01Rik		0	0	0	0.004	0			0	0	0	0
X2010106C02Rik		0	0.003	0	0	0			0.007	0	0	0
X2010106E10Rik		0.005	0.004	0.005	0	0.013			0	0.042	0.01	0
X2010107E04Rik		2.893	2.788	3.073	2.789	2.936			2.042	1.625	2.482	3.155
X2010107G12Rik		0.054	0.016	0.021	0.011	0.07			0.015	0	0.041	0.075
X2010107G23Rik		0.361	0.378	0.577	0.804	0.627			0.638	0.714	0.733	1.125
X2010109A12Rik		0.002	0.007	0.028	0.002	0			0.012	0	0.02	0.019
X2010109I03Rik		0.163	0.222	0.278	0.24	0.174			0.186	0.158	0.22	0.136
X2010110G14Rik		0	0	0	0.005	0			0	0	0	0
X2010110K18Rik		0	0.009	0.008	0.013	0.01			0.005	0	0	0.043
X2010111I01Rik		0.124	0.235	0.195	0.17	0.1			0.029	0.01	0.159	0.041
X2010204K13Rik		0.151	0.705	1.339	1.277	0.261			0.406	0.605	0.983	0.78
X2010300C02Rik		0.07	0.079	0.239	0.261	0.109			1.194	0.252	0.146	0.224
X2010300F17Rik		0	0	0.006	0.011	0.008			0	0	0	0
X2010308F09Rik		0	0.019	0.002	0.013	0			0	0	0.012	0.005
X2010310C07Rik		0.008	0.019	0.001	0.012	0			0	0.021	0	0
X2010315B03Rik		0.128	0.151	0.106	0.119	0.056			0.031	0.146	0.172	0.056
X2010320O07Rik		0	0	0.006	0.002	0.04			0	0	0	0
X2200002D01Rik		0.014	0.014	0.013	0.007	0.013			0	0.037	0	0.015
X2210008F06Rik		0.038	0.031	0.04	0.023	0.038			0.037	0	0	0.016
X2210010C04Rik		0.006	0.005	0.009	0.005	0			0.011	0	0.027	0
X2210011C24Rik		0.052	0.01	0.002	0.016	0.022			0.024	0	0.007	0.012
X2210011K15Rik		0	0.004	0	0.005	0.01			0	0	0	0
X2210013O21Rik		1.407	1.46	1.615	1.446	1.131			1.262	1.444	1.813	1.447
X2210016F16Rik		0.169	0.172	0.196	0.465	0.232			0.204	0.203	0.433	0.449
X2210016L21Rik		1.803	1.577	1.252	1.388	1.675			1.524	1.495	1.689	1.911
X2210017I01Rik		0	0	0.002	0	0			0.005	0	0	0
X2210019I11Rik		0.002	0	0.006	0.002	0			0.011	0.028	0	0
X2210404O09Rik		0.031	0.033	0.048	0.023	0.036			0.061	0.071	0	0
X2210406O10Rik		0.115	0.123	0.076	0.061	0.114			0.044	0.075	0.085	0.392
X2210407C18Rik		0	0.002	0	0	0			0	0	0	0
X2210408F21Rik		0.04	0.04	0.054	0.058	0.025			0.073	0.205	0.058	0.045
X2210408I21Rik		0.012	0.011	0.014	0.053	0.041			0.11	0.024	0.044	0.049
X2210411M09Rik		0	0.004	0.002	0	0			0	0	0	0
X2210414B05Rik		0	0	0	0.001	0			0	0	0.018	0
X2210417A02Rik		0	0	0.001	0	0			0	0	0	0
X2210418O10Rik		0	0	0	0	0			0	0	0	0
X2210420H20Rik		0.005	0	0	0.003	0.015			0	0	0	0.086
X2300002M23Rik		0.003	0	0.001	0	0			0	0	0	0
X2300003K06Rik		0	0	0.003	0.003	0			0	0	0	0
X2300009A05Rik		0.353	0.369	0.367	0.376	0.511			0.544	0.387	0.629	0.783
X2310001H17Rik		0	0.002	0.009	0.012	0			0.041	0.032	0	0.017
X2310001K24Rik		0.005	0.008	0.012	0.003	0.005			0.005	0	0.007	0
X2310002F09Rik		0.004	0	0.001	0.004	0.006			0	0	0	0
X2310002L09Rik		0.006	0.003	0.002	0	0.011			0	0	0	0.01
X2310003L06Rik		0	0	0.002	0.007	0			0	0	0.007	0
X2310005A03Rik		0.003	0.002	0	0.011	0			0.004	0	0	0
X2310005E17Rik		0.002	0	0	0.001	0			0.004	0	0.038	0
X2310007B03Rik		0.007	0	0	0.002	0			0	0	0.013	0
X2310008N11Rik		0	0	0	0.001	0			0	0	0	0
X2310009A05Rik		0.217	0.357	0.369	0.288	0.258			0.093	0.069	0.306	0.197
X2310009B15Rik		0.59	0.694	0.712	0.607	0.483			0.355	0.554	0.486	0.462
X2310010J17Rik		0.039	0.077	0.104	0.103	0.114			0.16	0.072	0.056	0.111
X2310011J03Rik		0.228	0.255	0.279	0.307	0.376			0.157	0.418	0.193	0.345
X2310014F06Rik		0.002	0.006	0.004	0.003	0			0.02	0.025	0.012	0
X2310015A10Rik		0.075	0.074	0.046	0.032	0.071			0.062	0.087	0.072	0.01
X2310015D24Rik		0	0	0	0.001	0			0	0	0	0
X2310015K22Rik		0.003	0.002	0.007	0.025	0			0	0	0	0.015
X2310016D03Rik		0	0.017	0.002	0.03	0.005			0	0	0.008	0
X2310016D23Rik		0.002	0.005	0	0	0			0.02	0	0.011	0.055
X2310016G11Rik		0	0.004	0.002	0	0			0	0	0	0
X2310020H05Rik		0	0	0	0.004	0			0	0	0	0
X2310022A10Rik		0.808	0.904	0.774	0.809	0.776			0.699	1.016	0.99	1.111
X2310022B05Rik		0.029	0.055	0.058	0.032	0.016			0.088	0.054	0.073	0.113
X2310026I22Rik		0.002	0.004	0.009	0.008	0			0.026	0	0	0
X2310026L22Rik		0.006	0.009	0.009	0.026	0.012			0	0	0	0
X2310030A07Rik		0	0	0	0	0			0	0	0	0
X2310030G06Rik		0.044	0.031	0.052	0.037	0.039			0.006	0	0.037	0.032
X2310031A07Rik		0.005	0	0	0.002	0			0	0	0	0
X2310033P09Rik		0.218	0.234	0.251	0.258	0.328			0.225	0.18	0.243	0.251
X2310034C09Rik		0.013	0	0.01	0.004	0			0.049	0.017	0	0
X2310034O05Rik		0.003	0	0.007	0	0.05			0	0	0	0
X2310035C23Rik		0.055	0.051	0.07	0.093	0.152			0.092	0.103	0.036	0.085
X2310036O22Rik		1.156	1.125	1.244	1.336	1.244			0.722	1.041	1.353	1.266
X2310039H08Rik		0.071	0.051	0.029	0.055	0.02			0.122	0.315	0.081	0.116
X2310039L15Rik		0	0.009	0.002	0	0			0	0	0.018	0.024
X2310040G24Rik		0.031	0.03	0.037	0.008	0.011			0.062	0.034	0.013	0.044
X2310043L19Rik		0	0	0.001	0	0			0	0	0	0
X2310043M15Rik		0.002	0.002	0	0	0			0	0	0.011	0
X2310043O21Rik		0.002	0	0	0.001	0			0	0	0	0
X2310044K18Rik		0	0.002	0	0	0			0	0	0.01	0
X2310046K23Rik		0	0	0.001	0.002	0			0	0	0	0
X2310047D07Rik		0.004	0.003	0.003	0.001	0.033			0	0	0.029	0
X2310050C09Rik		0.002	0	0.001	0	0			0	0	0	0
X2310057J18Rik		0.005	0.009	0	0	0			0	0	0	0
X2310057M21Rik		0.26	0.22	0.359	0.285	0.217			0.309	0.236	0.318	0.186
X2310057N15Rik		0.002	0.003	0.004	0	0			0.006	0	0.013	0.014
X2310058D17Rik		0.105	0.051	0.056	0.014	0.067			0.038	0.04	0.036	0.073
X2310061I04Rik		0.758	0.742	0.684	0.616	0.642			0.957	1.13	0.827	0.754
X2310061N02Rik		0.003	0	0	0	0.004			0	0	0	0
X2310065F04Rik		0.007	0.006	0.003	0.004	0.006			0.016	0	0.012	0.009
X2310069B03Rik		0.006	0	0.008	0.004	0			0.008	0	0	0
X2310069G16Rik		0.034	0.024	0.005	0.018	0			0.01	0	0.008	0.024
X2310075C17Rik		0	0	0	0	0			0	0	0	0
X2310079G19Rik		0	0	0.002	0	0.005			0	0	0	0
X2310081O03Rik		0.002	0	0	0.001	0			0	0	0	0
X2410002F23Rik		0.825	0.845	0.894	1.072	1.123			0.763	1.021	1.162	0.948
X2410003L11Rik		0	0	0.002	0.001	0			0	0	0	0.014
X2410004B18Rik		0.454	0.547	0.423	0.661	0.612			0.406	0.611	0.496	0.417
X2410004I01Rik		0.001	0.004	0	0.003	0.009			0.007	0	0	0.015
X2410004P03Rik		0.278	0.295	0.346	0.309	0.245			0.265	0.443	0.379	0.194
X2410006H16Rik		0.265	0.506	0.839	1.066	1.131			0.587	0.321	0.898	0.86
X2410012E07Rik		0	0.002	0.002	0.026	0.006			0.004	0	0	0
X2410015M20Rik		0.711	0.656	0.826	0.774	0.727			0.439	0.34	0.788	0.801
X2410016O06Rik		0.048	0.097	0.067	0.143	0.143			0.152	0.016	0.054	0.015
X2410017I17Rik		0.014	0.016	0.046	0.021	0.027			0.024	0.078	0.039	0.008
X2410018L13Rik		0.114	0.078	0.045	0.164	0.079			0.589	0.416	0.116	0.098
X2410021H03Rik		0.005	0.022	0.012	0	0.016			0	0	0.018	0
X2410080I02Rik		0.004	0	0	0	0			0	0	0	0
X2410089E03Rik		0.045	0.069	0.044	0.119	0.021			0.098	0.177	0.042	0.033
X2410124H12Rik		0	0	0.002	0.002	0			0	0	0	0.07
X2410131K14Rik		0.243	0.164	0.195	0.203	0.197			0.374	0.523	0.278	0.297
X2410137M14Rik		0	0.011	0	0	0			0	0	0	0
X2410141K09Rik		0	0.007	0	0	0			0	0	0.004	0
X2410152P15Rik		0	0	0.011	0.003	0.013			0.015	0	0	0
X2500002B13Rik		0.025	0.014	0.051	0.03	0.009			0.028	0	0	0.012
X2500004C02Rik		0.257	0.351	0.346	0.345	0.179			0.268	0.286	0.434	0.195
X2510002D24Rik		0.36	0.476	0.582	0.466	0.452			0.272	0.315	0.356	0.192
X2510009E07Rik		1.958	1.48	1.058	0.985	1.651			0.321	0.24	0.814	1.192
X2510039O18Rik		0.27	0.212	0.272	0.309	0.388			0.201	0.311	0.15	0.431
X2600006K01Rik		0.011	0.018	0.017	0.05	0.008			0.072	0.039	0.024	0.009
X2610001J05Rik		0.848	1.097	1.123	1.166	1.407			0.723	0.538	1.545	1.059
X2610002M06Rik		0.639	0.727	0.601	0.726	0.892			0.769	0.503	0.855	0.697
X2610005L07Rik		0.068	0.072	0.078	0.093	0.042			0.083	0.116	0.04	0.049
X2610008E11Rik		0.166	0.246	0.287	0.316	0.224			0.186	0.147	0.155	0.283
X2610016A17Rik		0.003	0.007	0	0.002	0			0	0.014	0	0.01
X2610020C07Rik		0.025	0.034	0.036	0.032	0.01			0.051	0.065	0.064	0.025
X2610020F03Rik		0	0.002	0.002	0.007	0			0	0	0	0.009
X2610020H08Rik		0.007	0.014	0.017	0.01	0.085			0.009	0	0.047	0.031
X2610021A01Rik		0.127	0.111	0.15	0.212	0.194			0.142	0.13	0.037	0.093
X2610027K06Rik		0.003	0	0.002	0	0.008			0	0	0	0
X2610028E06Rik		0.004	0.004	0.028	0.03	0.006			0	0	0.12	0.025
X2610028H24Rik		0.016	0.006	0.023	0.005	0			0.006	0	0.037	0.016
X2610035D17Rik		0.107	0.113	0.165	0.14	0.112			0.13	0.076	0.097	0.088
X2610035F20Rik		0.162	0.14	0.18	0.174	0.18			0.036	0.021	0.131	0.057
X2610037D02Rik		0.151	0.075	0.057	0.038	0.071			0.085	0.217	0.095	0.137
X2610042L04Rik		0.202	0.184	0.128	0.241	0.445			0.147	0.167	0.117	0.184
X2610044O15Rik8		0.25	0.24	0.238	0.27	0.274			0.297	0.359	0.271	0.168
X2610203C20Rik		0.015	0.011	0.005	0.037	0.069			0.266	0.271	0.113	0.088
X2610203C22Rik		0.007	0.008	0.004	0.006	0			0	0	0.007	0.009
X2610204G07Rik		0.002	0	0.002	0	0			0	0	0	0
X2610301B20Rik		0.911	1.024	1.209	1.178	1.191			0.66	1.092	0.917	1.594
X2610303G11Rik		0	0.001	0.002	0.002	0			0	0	0	0
X2610305D13Rik		0.318	0.123	0.025	0.072	0.282			0.1	0.349	0.04	0.153
X2610307P16Rik		0.007	0.054	0.049	0.042	0.068			0	0.088	0.008	0.014
X2610316D01Rik		0.005	0	0	0.004	0			0.053	0	0.011	0
X2610318N02Rik		0.07	0.06	0.063	0.045	0.05			0	0.022	0.011	0.202
X2610507B11Rik		1.327	1.156	1.171	1.297	1.04			1.472	1.262	1.248	1.474
X2610507I01Rik		0.015	0.009	0.02	0.022	0			0	0	0	0
X2610524H06Rik		0.079	0.125	0.151	0.215	0.162			0.12	0.306	0.201	0.126
X2610528A11Rik		0.011	0	0.006	0.013	0.008			0.013	0	0	0.005
X2610528J11Rik		0	0.015	0	0.002	0			0	0	0	0
X2700012I20Rik		0	0.017	0.006	0.003	0.006			0	0	0	0.012
X2700016F22Rik		0.05	0.064	0.04	0.076	0.169			0.085	0.209	0.07	0.008
X2700029M09Rik		0.815	0.751	0.788	0.861	0.623			0.603	0.862	0.88	0.731
X2700033N17Rik		0	0.001	0.001	0	0			0	0	0	0
X2700038G22Rik		0.051	0.052	0.107	0.08	0.125			0.108	0	0.107	0.031
X2700046A07Rik		0.023	0.005	0.006	0.005	0			0.02	0	0	0
X2700046G09Rik		0.048	0.044	0.064	0.054	0.036			0.063	0.042	0.063	0.026
X2700049A03Rik		0.042	0.047	0.085	0.1	0.089			0.096	0.26	0.053	0.065
X2700060E02Rik		1.42	1.427	1.567	2.198	1.343			1.615	1.093	1.5	1.286
X2700062C07Rik		0.093	0.121	0.113	0.143	0.079			0.178	0.024	0.123	0.069
X2700068H02Rik		0.003	0	0.002	0.013	0			0.016	0.017	0	0
X2700069I18Rik		0.003	0	0.006	0	0.009			0.023	0.027	0.032	0
X2700081O15Rik		0.018	0.032	0.034	0.044	0.181			0.021	0.023	0.023	0.053
X2700089I24Rik		0.002	0.003	0.003	0.003	0.006			0	0.043	0.004	0
X2700094K13Rik		0.795	0.809	0.907	0.911	1.084			0.674	0.62	0.861	0.959
X2700097O09Rik		0.36	0.289	0.424	0.551	0.414			0.517	1.084	0.523	0.405
X2700099C18Rik		0	0.007	0.004	0.012	0			0.004	0	0.036	0
X2810001G20Rik		0.23	0.24	0.29	0.342	0.188			0.291	0.206	0.668	0.119
X2810002D19Rik		0.125	0.129	0.092	0.092	0.127			0.067	0.092	0.074	0.094
X2810004N23Rik		0.156	0.12	0.065	0.107	0.047			0.235	0.16	0.13	0.113
X2810006K23Rik		0.115	0.147	0.151	0.128	0.089			0.101	0.111	0.144	0.103
X2810021J22Rik		0.061	0.039	0.067	0.104	0.125			0.049	0	0.03	0.053
X2810025M15Rik		0.367	0.331	0.329	0.201	0.165			0.192	0.174	0.203	0.417
X2810029C07Rik		0.122	0.092	0.146	0.064	0.078			0.132	0.06	0.109	0.123
X2810030D12Rik		0.006	0.004	0.008	0	0			0	0	0.058	0
X2810032G03Rik		0.154	0.085	0.004	0.053	0.135			0.058	0.135	0.07	0.544
X2810039B14Rik		0.039	0.036	0.08	0.056	0.096			0.039	0.083	0.171	0
X2810049E08Rik		0.018	0.015	0.024	0.006	0			0.031	0	0.047	0
X2810403A07Rik		0.915	0.897	0.857	0.906	0.836			0.724	0.61	0.981	0.721
X2810403D21Rik		0.397	0.542	0.717	1.384	1.009			1.057	0.966	0.763	0.476
X2810404F17Rik		0.003	0.009	0.002	0	0			0	0	0	0
X2810404M03Rik		0	0	0.007	0.004	0			0	0	0	0
X2810407A14Rik		0.011	0.005	0.007	0.016	0.013			0	0	0.009	0.011
X2810408A11Rik		0.002	0	0.009	0.002	0			0.01	0	0	0
X2810408I11Rik		0.009	0.015	0.006	0.018	0.028			0	0.025	0.011	0
X2810410L24Rik		0.059	0.045	0.02	0.057	0.052			0.028	0	0.037	0.115
X2810414N06Rik		0.082	0.062	0.034	0.021	0.033			0.107	0.01	0.022	0.056
X2810417H13Rik		0.072	0.126	0.141	0.166	0.096			0.189	0.178	0.117	0.047
X2810428I15Rik		0.316	0.305	0.462	0.38	0.678			0.386	0.443	0.646	0.406
X2810429I04Rik		0.089	0.066	0.029	0.074	0.073			0.075	0.056	0.124	0.108
X2810430I11Rik		0.002	0.002	0.004	0.009	0			0.008	0	0	0
X2810433D01Rik		0.022	0.022	0.044	0.029	0.027			0.039	0.074	0.011	0.068
X2810442N19Rik		0	0.01	0.002	0.002	0			0	0	0.009	0
X2810455O05Rik		0.092	0.039	0.031	0.015	0.016			0.114	0	0	0.049
X2810459M11Rik		0.005	0.022	0.002	0.004	0.009			0.009	0.059	0	0
X2810468N07Rik		0.029	0.024	0.002	0.024	0.06			0.093	0	0	0
X2810471M01Rik		0	0.001	0.004	0	0			0	0	0	0
X2810474O19Rik		0.15	0.18	0.282	0.275	0.328			0.289	0.449	0.339	0.387
X2900005J15Rik		0.002	0.004	0.003	0.005	0.029			0.009	0	0.014	0
X2900009J06Rik		0.006	0.005	0.018	0.023	0.008			0.017	0	0.008	0.007
X2900011O08Rik		1.395	1.441	1.21	1.294	0.732			3.536	2.787	0.893	0.531
X2900026A02Rik		0.009	0.004	0.017	0.014	0.028			0.045	0.195	0.03	0.183
X2900041M22Rik		0	0.006	0.005	0.004	0			0.038	0.064	0.006	0.011
X2900052L18Rik		0.032	0.017	0.053	0.024	0.046			0.025	0	0.007	0.009
X2900052N01Rik		0.005	0.02	0.089	0.075	0.005			0.017	0	0.012	0.016
X2900055J20Rik		0.002	0.001	0	0.004	0			0.167	0.278	0	0
X2900072N19Rik		0	0.023	0.012	0	0.011			0	0	0.027	0
X2900076A07Rik		0.154	0.169	0.227	0.217	0.027			0.111	0.125	0.141	0.175
X2900079G21Rik		0.004	0.01	0.025	0.016	0.028			0.023	0.038	0.015	0
X2900089D17Rik		0.066	0.051	0.018	0.06	0.036			0.006	0.029	0.016	0.01
X2900092C05Rik		0	0.002	0	0	0			0.005	0	0.027	0
X3000002C10Rik		0.474	0.309	0.295	0.369	0.475			0.369	0.33	0.392	0.27
X3010001F23Rik		0.063	0.021	0.058	0.064	0.102			0.02	0.269	0.02	0.027
X3010003L21Rik		0.006	0.005	0.02	0.004	0.015			0	0	0.007	0.011
X3010026O09Rik		0.123	0.054	0.095	0.146	0.195			0.08	0.072	0.146	0.137
X3100002H09Rik		0.027	0.021	0.01	0.006	0.022			0.009	0	0.011	0.026
X3100003L05Rik		0.002	0	0.003	0	0			0	0	0.016	0
X3110001I22Rik		0.009	0.055	0.019	0.011	0.009			0.015	0	0.029	0.043
X3110002H16Rik		0.201	0.277	0.17	0.199	0.236			0.13	0.051	0.154	0.286
X3110004A20Rik		0.003	0	0	0	0			0	0	0	0
X3110009E18Rik		0.029	0.015	0.041	0.035	0			0.013	0.143	0	0.015
X3110018I06Rik		0	0.015	0.006	0.006	0			0	0	0	0.01
X3110035E14Rik		0.012	0.009	0.016	0.008	0			0.539	0.089	0.042	0.014
X3110039M20Rik		0.002	0	0	0	0			0	0	0	0
X3110040N11Rik		0.048	0.134	0.067	0.105	0.073			0.101	0.02	0.05	0.113
X3110043O21Rik		0.29	0.379	0.483	0.277	0.2			0.389	0.375	0.302	0.409
X3110045C21Rik		0.008	0.008	0.044	0.055	0.007			0	0.01	0.053	0
X3110052M02Rik		0.039	0.072	0.038	0.005	0.048			0.036	0	0.02	0.017
X3110053B16Rik		0.024	0.049	0.015	0.027	0.026			0.019	0.026	0.018	0.06
X3110056K07Rik		0.03	0.023	0.014	0.019	0.024			0	0.037	0.048	0
X3110062M04Rik		0.232	0.152	0.078	0.093	0.127			0.077	0.103	0.155	0.172
X3110070M22Rik		0	0.01	0.004	0.003	0.015			0	0	0.009	0.007
X3110079O15Rik		0.003	0	0.001	0	0			0	0	0	0
X3110082I17Rik		0.015	0.051	0.05	0.054	0.064			0.074	0.052	0.067	0.195
X3110082J24Rik		0.002	0	0.005	0.005	0			0	0	0	0
X3110083C13Rik		0.026	0.008	0.027	0.003	0.011			0	0.035	0.015	0.006
X3110099E03Rik		0.005	0.002	0.005	0.008	0.006			0.022	0.019	0.031	0
X3300002A11Rik		0	0.012	0	0.008	0.02			0.012	0	0.008	0.005
X3300002I08Rik		0.013	0.011	0.02	0.007	0			0.007	0	0.013	0
X3300002P13Rik		0.003	0	0.002	0.002	0			0	0.018	0.028	0
X3300005D01Rik		0.003	0	0.006	0	0.007			0	0	0.009	0
X3425401B19Rik		0	0.005	0.001	0.001	0.025			0.005	0	0.01	0.006
X3632451O06Rik		4.905	2.855	1.383	0.985	2.57			1.067	1.324	1.445	1.649
X3632454L22Rik		0.012	0.039	0.064	0.05	0.056			0.022	0.018	0.031	0.052
X3830403N18Rik		0	0	0	0	0			0.004	0.017	0	0
X3830406C13Rik		0.232	0.162	0.264	0.229	0.243			0.262	0.18	0.347	0.285
X3830408C21Rik		0.045	0.037	0.04	0.04	0.038			0.018	0.115	0.038	0.039
X3830417A13Rik		0.006	0	0.001	0.004	0			0	0	0	0.016
X3830432H09Rik		0.008	0	0.005	0.007	0			0	0	0	0.005
X3930402G23Rik		0	0.003	0.005	0.007	0			0.01	0	0	0
X4430402I18Rik		0.017	0.067	0.02	0.034	0			0.05	0	0	0.01
X4631405J19Rik		0.003	0.002	0.019	0.002	0			0.009	0	0	0
X4631405K08Rik		0	0	0.001	0	0			0	0	0	0
X4632404H12Rik		0.085	0.071	0.12	0.095	0.111			0.09	0.064	0.214	0.051
X4632411P08Rik		0.04	0.011	0.042	0.023	0			0.032	0	0	0
X4632427E13Rik		0.323	0.366	0.437	0.539	0.377			0.387	0.489	0.456	0.237
X4632428C04Rik		0.011	0.02	0.032	0.047	0			0.082	0.21	0	0.008
X4731419I09Rik		0	0.027	0.006	0.005	0.005			0	0	0.007	0.007
X4732414G09Rik		0.007	0.022	0.03	0.025	0.025			0.007	0.022	0.061	0.026
X4732419C18Rik		0.154	0.254	0.228	0.259	0.218			0.348	0.285	0.221	0.22
X4732463B04Rik		0.014	0.008	0.03	0.017	0			0.049	0.159	0.039	0.026
X4732465J04Rik		0.002	0.007	0.009	0.016	0.024			0.017	0.203	0.008	0
X4732471J01Rik		0.021	0.005	0.022	0.008	0.054			0.019	0	0.044	0.091
X4732487G21Rik		0	0.002	0	0.003	0			0.01	0	0	0
X4732490B19Rik		0.006	0.006	0	0	0.006			0	0	0.007	0
X4732491K20Rik		0.028	0.068	0.029	0.038	0.022			0.029	0.033	0.063	0.048
X4831440E17Rik		0	0.011	0.005	0.005	0			0	0	0	0
X4833407H14Rik		0.004	0.021	0.001	0.003	0			0	0	0.007	0
X4833412C05Rik		0.004	0.003	0.021	0.002	0.006			0.012	0	0	0
X4833413E03Rik		0.003	0.002	0.004	0.009	0.011			0.005	0	0	0
X4833417C18Rik		0.009	0.008	0.002	0.004	0			0	0.029	0.008	0.019
X4833418N02Rik		0.018	0.015	0.013	0.032	0.006			0	0.054	0.089	0
X4833420G17Rik		0.26	0.342	0.522	0.503	0.459			0.444	0.555	0.434	0.159
X4833422C13Rik		0.005	0.019	0.016	0.007	0			0.049	0.102	0	0.014
X4833422M21Rik		0.056	0.011	0.012	0.029	0.009			0	0.017	0.011	0
X4833423E24Rik		0.038	0.027	0.044	0.341	1.784			0.176	0.435	0.014	6.66
X4833427F10Rik		0.002	0.006	0.023	0.004	0			0	0	0.04	0
X4833427G06Rik		0	0.002	0	0	0.005			0	0	0	0
X4833428L15Rik		0	0.003	0	0	0			0	0	0	0
X4833439L19Rik		0.966	0.962	0.751	0.792	1.147			0.604	0.563	0.677	0.912
X4921501E09Rik		0	0	0.004	0	0.007			0.009	0	0	0.017
X4921504A21Rik		0.02	0.026	0.033	0.023	0.043			0.09	0	0.019	0.005
X4921504E06Rik		0.009	0.002	0	0.004	0.008			0	0.022	0	0
X4921507G05Rik		0	0.007	0.026	0.001	0.004			0	0.053	0.008	0
X4921507P07Rik		0.025	0.117	0.02	0.037	0.033			0.015	0	0.026	0.024
X4921508D12Rik		0.002	0.003	0.001	0.004	0			0	0	0	0
X4921508M14Rik		0	0	0.001	0.002	0.006			0	0	0	0
X4921509C19Rik		0	0.005	0.001	0.013	0			0.009	0	0	0.012
X4921511C10Rik		0.002	0	0.001	0	0			0	0	0	0
X4921511C20Rik		0.001	0	0	0.002	0			0	0	0	0
X4921511H03Rik		0.006	0.018	0.005	0.003	0			0	0	0	0.006
X4921511M17Rik		0	0	0	0	0			0	0	0	0
X4921513D11Rik		0	0	0.004	0	0			0	0	0	0
X4921513I03Rik		0.002	0	0	0.006	0			0	0	0	0
X4921513I08Rik		0	0	0.007	0.008	0.006			0	0.022	0	0
X4921514A10Rik		0.009	0.006	0.02	0.011	0.013			0.025	0	0	0
X4921517D22Rik		0.006	0.007	0.011	0.008	0.01			0.01	0	0.004	0.025
X4921518K17Rik		0.02	0.033	0.036	0.012	0.02			0.018	0	0	0.123
X4921521D15Rik		0.002	0	0.004	0	0.015			0.018	0	0.007	0
X4921522P10Rik		0.01	0.004	0.008	0.007	0			0	0	0.004	0.026
X4921523L03Rik		0.094	0.151	0.137	0.176	0.043			0.238	0.177	0.149	0.173
X4921524J17Rik		0.383	0.616	0.527	0.598	0.3			0.218	0.292	0.278	0.39
X4921524L21Rik		0	0	0	0.003	0			0	0	0.093	0
X4921528I07Rik		0	0.002	0.001	0	0			0.008	0	0.012	0
X4921529L05Rik		0.002	0.004	0.002	0.005	0			0.021	0	0.007	0.131
X4921530L21Rik		0.003	0.004	0.004	0.01	0			0	0	0	0
X4921531C22Rik		0.044	0.051	0.073	0.048	0.038			0.125	0.175	0.063	0.019
X4921534H16Rik		0.011	0.022	0.004	0.005	0.007			0	0	0	0
X4921536K21Rik		0	0.005	0.016	0.012	0.009			0.006	0	0.046	0.034
X4921539E11Rik		0.003	0.003	0.007	0.011	0			0	0	0.011	0
X4921539H07Rik		0	0.005	0	0.008	0.019			0	0	0.012	0
X4922502D21Rik		0	0	0.002	0.006	0.004			0	0	0.038	0
X4922502N22Rik		0.001	0	0.01	0.002	0			0	0	0	0.01
X4930401G09Rik		0	0.01	0	0.001	0			0	0	0	0
X4930401O10Rik		0.004	0	0	0.005	0			0.007	0	0	0.012
X4930402C01Rik		0	0	0.001	0	0			0.014	0	0	0.007
X4930402F06Rik		0	0	0.003	0.003	0.009			0.004	0	0	0
X4930402H24Rik		1.129	1.259	1.462	1.616	1.524			0.937	1.713	1.656	1.875
X4930402K13Rik		0.007	0	0.001	0	0			0	0	0.007	0
X4930403D09Rik		0	0	0	0	0			0.009	0	0	0
X4930403O15Rik		0.012	0.009	0.015	0.013	0.007			0.027	0.031	0.016	0.043
X4930404A12Rik		0.003	0.002	0	0	0			0	0	0	0
X4930404H24Rik		0	0	0	0	0.005			0	0	0	0
X4930404I05Rik		0.005	0.021	0.017	0.013	0			0.051	0	0.017	0.058
X4930404N11Rik		0.005	0.051	0.017	0.02	0.025			0	0	0.009	0.032
X4930405A21Rik		0.005	0.005	0.014	0.015	0			0	0	0	0.03
X4930405D11Rik		0	0	0.012	0	0.013			0.008	0	0	0.013
X4930405H06Rik		0.004	0.005	0.004	0.002	0			0	0	0.021	0.015
X4930405L22Rik		0	0	0	0	0			0	0	0	0
X4930405O22Rik		0.005	0	0	0.004	0.004			0	0	0.009	0
X4930406D18Rik		0	0.006	0	0	0			0	0	0	0
X4930407G08Rik		0	0.002	0	0.005	0			0	0	0	0
X4930407I10Rik		0	0.005	0.003	0.004	0			0	0	0	0
X4930408K08Rik		0	0.002	0.006	0	0.01			0.008	0.019	0.011	0.013
X4930408O17Rik		0	0	0	0	0			0	0	0.012	0
X4930412B13Rik		0	0	0	0	0			0	0	0	0
X4930412C18Rik		0.084	0.091	0.038	0.074	0.104			0.067	0.15	0.049	0.032
X4930412E21Rik		0.002	0	0	0.002	0			0	0	0	0
X4930412F09Rik		0	0.005	0	0	0.006			0	0	0	0
X4930412L05Rik		0.002	0	0	0	0.009			0	0	0	0
X4930412M03Rik		0	0	0	0	0			0	0	0	0.016
X4930412O13Rik		0	0.002	0	0	0			0	0	0	0
X4930413E15Rik		0	0.003	0	0	0			0	0	0	0
X4930415F15Rik		0	0.001	0.001	0.003	0			0	0	0	0
X4930415L06Rik		0	0.002	0	0.009	0			0	0.009	0	0
X4930415O20Rik		0	0	0	0.004	0			0	0	0	0
X4930417H01Rik		0.01	0.004	0.022	0.002	0			0	0	0	0.013
X4930417O13Rik		0.004	0.015	0.005	0.013	0			0	0.016	0	0.024
X4930417O22Rik		0.03	0.021	0.015	0.017	0.016			0.016	0	0.014	0.011
X4930419G24Rik		0	0	0	0.025	0			0	0	0	0
X4930422M22Rik		0	0.002	0	0.002	0			0	0	0	0.02
X4930423M02Rik		0.004	0	0	0	0			0	0.061	0.009	0
X4930425K10Rik		0	0	0	0	0			0	0	0	0
X4930425L21Rik		0	0.004	0.001	0	0.01			0	0	0	0
X4930425O10Rik		0.005	0	0	0	0			0	0	0	0.008
X4930426D05Rik		0.003	0.003	0.013	0.008	0			0.121	0	0.011	0
X4930426I24Rik		0	0	0.002	0	0			0	0	0	0
X4930426L09Rik		0.037	0.043	0.019	0.008	0.038			0.007	0	0.008	0.009
X4930427A07Rik		0.005	0.022	0.007	0.01	0			0	0.176	0	0
X4930428N03Rik		0.002	0.006	0.011	0.028	0			0.012	0	0	0
X4930428O21Rik		0	0.002	0.002	0.002	0			0.007	0	0.016	0
X4930429D17Rik		0	0	0.004	0	0			0	0	0	0
X4930429F24Rik		0	0	0.001	0.008	0			0.005	0.075	0	0
X4930429H19Rik		0.002	0	0.002	0.015	0.01			0	0	0	0
X4930429P21Rik		0	0	0.006	0	0			0	0	0	0
X4930430A15Rik		0	0.003	0	0	0			0	0	0	0
X4930430F08Rik		0.34	0.304	0.246	0.236	0.378			0.147	0.292	0.233	0.27
X4930431F12Rik		0.003	0	0.006	0.008	0			0.009	0	0	0
X4930431L21Rik		0	0	0	0	0			0	0	0	0
X4930431P03Rik		0.005	0.002	0.01	0.011	0			0.008	0	0	0.008
X4930432B10Rik		0.007	0.005	0.008	0.017	0.011			0.006	0	0.006	0
X4930432E11Rik		0.002	0.003	0.002	0.017	0			0.005	0.131	0	0
X4930432H08Rik		0.003	0.002	0.002	0	0			0	0	0	0
X4930432K21Rik		0	0.012	0.005	0.028	0.153			0.056	0	0.01	0
X4930432L08Rik		0	0	0	0	0			0	0	0	0
X4930432M17Rik		0	0.002	0	0.028	0			0	0	0	0
X4930433B08Rik		0	0	0.003	0	0			0	0	0	0.008
X4930433I11Rik		0.003	0.011	0	0	0.01			0	0	0.006	0
X4930433J02Rik		0	0.009	0	0.002	0			0	0	0	0
X4930433N12Rik		0	0.002	0	0	0.006			0	0	0	0
X4930434B07Rik		0	0.004	0.002	0.007	0			0	0	0	0
X4930435E12Rik		0	0.005	0.006	0	0			0	0	0	0
X4930438E09Rik		0.003	0.005	0	0.001	0			0	0	0	0
X4930439A04Rik		0	0	0	0	0			0	0	0	0
X4930440C22Rik		0	0.005	0.008	0.01	0.004			0.008	0	0	0.005
X4930440I19Rik		0.002	0.005	0.003	0.016	0			0.017	0	0	0
X4930441H08Rik		0.001	0	0.003	0	0			0	0	0	0
X4930441J16Rik		0	0	0	0.003	0			0.013	0	0	0
X4930442H23Rik		0	0	0.011	0.003	0			0	0	0	0
X4930442J19Rik		0	0	0	0	0			0	0	0	0
X4930442L01Rik		0	0	0.002	0	0			0	0.152	0	0
X4930443O20Rik		0.002	0	0	0	0			0.008	0	0.004	0
X4930444A19Rik		0.022	0.007	0.003	0.007	0			0	0	0	0
X4930444E06Rik		0.007	0.005	0.013	0.024	0.117			0	0	0	0
X4930444G20Rik		0	0	0.002	0	0			0	0	0	0
X4930444M15Rik		0	0.006	0.004	0.002	0			0.009	0.035	0	0
X4930444P10Rik		0.075	0.059	0.042	0.035	0.016			0.017	0.02	0.088	0.086
X4930445B16Rik		0.005	0.002	0	0.002	0			0	0.107	0	0
X4930445N08Rik		0	0.002	0	0.003	0			0	0	0	0
X4930445N18Rik		0.002	0.002	0	0.002	0			0	0	0	0
X4930447A16Rik		0	0	0	0	0			0	0	0	0
X4930447C04Rik		0.054	0.113	0.127	0.123	0.179			0.254	0.232	0.12	0.077
X4930447F04Rik		0	0	0.001	0	0			0	0	0	0
X4930447F24Rik		0.053	0.152	0.464	0.093	0.01			0	0	0.06	0.031
X4930447M23Rik		0	0.002	0.004	0.004	0			0	0	0	0
X4930447N08Rik		0.003	0.002	0.018	0.011	0.014			0.013	0	0.009	0
X4930448A20Rik		0.002	0.004	0.002	0	0			0	0	0	0
X4930448D08Rik		0.005	0	0.014	0.003	0			0.01	0	0.024	0
X4930448E22Rik		0.015	0.022	0.024	0.024	0.009			0.039	0	0	0.017
X4930448I06Rik		0	0.002	0.001	0.007	0			0	0	0.011	0
X4930448I18Rik		0	0	0.003	0.004	0			0	0	0.039	0
X4930448N21Rik		0.002	0.006	0.007	0.003	0			0	0	0.017	0
X4930449A18Rik		0	0.002	0.001	0.004	0			0	0	0	0
X4930449E01Rik		0	0	0	0	0			0	0	0	0
X4930449I24Rik		0	0	0.004	0.004	0			0.015	0	0	0
X4930451E10Rik		0	0.003	0.002	0	0			0	0	0	0
X4930451G09Rik		0.01	0.016	0.032	0.037	0.038			0.053	0.021	0.012	0
X4930451I11Rik		0	0.003	0	0	0			0	0	0	0
X4930452B06Rik		0.018	0.116	0.061	0.037	0.03			0.058	0.071	0.033	0
X4930452N14Rik		0	0	0	0	0			0.023	0	0	0.011
X4930453H23Rik		0	0.001	0	0.004	0			0	0	0	0
X4930453N24Rik		0.263	0.392	0.283	0.248	0.133			0.213	0.188	0.248	0.285
X4930453O03Rik		0	0	0	0	0			0	0	0	0.012
X4930455B14Rik		0	0.003	0.001	0	0.007			0	0.009	0	0
X4930455D15Rik		0	0	0	0.001	0.023			0	0	0	0
X4930455G09Rik		0.008	0	0.014	0.006	0			0.005	0	0	0
X4930455H04Rik		0	0	0	0.005	0.007			0	0	0.007	0
X4930456L15Rik		0.006	0	0	0.004	0			0.008	0	0	0
X4930458D05Rik		0.008	0.018	0.02	0.011	0.008			0.004	0	0.03	0.007
X4930459L07Rik		0	0	0	0	0			0	0.018	0	0
X4930461C15Rik		0.003	0.016	0.003	0	0.013			0	0.018	0	0.013
X4930461G14Rik		0.003	0	0	0.004	0			0	0	0	0
X4930463O16Rik		0	0.002	0.001	0.005	0			0	0	0	0
X4930465M20Rik		0	0.003	0.009	0.004	0			0	0	0	0
X4930466I24Rik		0	0	0	0	0			0	0	0	0.016
X4930467D21Rik		0.01	0.004	0.013	0	0.005			0	0	0	0
X4930467K11Rik		0.003	0.002	0	0	0			0	0	0	0
X4930469G21Rik		0	0.003	0.005	0	0			0	0	0	0
X4930469K13Rik		0.003	0	0.003	0	0			0	0	0.026	0.006
X4930470G03Rik		0.028	0.015	0.02	0.015	0.021			0.046	0	0.041	0.015
X4930470P17Rik		0	0	0.004	0	0			0	0	0	0
X4930471C04Rik		0	0	0.003	0	0			0	0	0.01	0
X4930471C06Rik		0	0	0	0	0			0	0	0.004	0
X4930471D02Rik		0.01	0.017	0.026	0.014	0.005			0.043	0.009	0.025	0.009
X4930471M09Rik		0.004	0	0.006	0	0			0.005	0	0	0
X4930473A02Rik		0	0	0	0	0.005			0	0	0	0
X4930473D10Rik		0	0	0	0	0			0	0	0	0
X4930474H06Rik		0	0	0	0	0			0	0	0	0
X4930474N05Rik		0.011	0.028	0.012	0.029	0.02			0.017	0.024	0	0
X4930477E14Rik		0	0.005	0.006	0	0			0	0	0	0
X4930478K11Rik		0	0.014	0.005	0.002	0			0.01	0	0	0
X4930478P22Rik		0.003	0	0.003	0	0			0.015	0	0	0
X4930479D17Rik		0	0.007	0.008	0.025	0			0.01	0	0	0
X4930480E11Rik		0.002	0	0.013	0.003	0			0	0	0	0
X4930480K15Rik		0.003	0.002	0.008	0	0			0.007	0.078	0	0
X4930480K23Rik		0.05	0.037	0.026	0.013	0.06			0.014	0	0.004	0.023
X4930481A15Rik		0.095	0.181	0.121	0.083	0.078			0.043	0.08	0.108	0.211
X4930481B07Rik		0.004	0.003	0.002	0.006	0			0	0	0	0
X4930483J18Rik		0.006	0.009	0.002	0.002	0			0.013	0	0	0
X4930483K19Rik		0.002	0.002	0	0.025	0			0	0	0	0
X4930486I03Rik		0	0	0	0	0			0	0	0	0
X4930486L24Rik		0	0	0	0.004	0			0	0	0	0
X4930487D11Rik		0	0	0	0	0			0	0	0	0
X4930488B22Rik		0	0	0.011	0	0			0	0	0	0
X4930500F04Rik		0	0	0	0	0.007			0	0	0	0.013
X4930500F10Rik		0.01	0	0.011	0.007	0			0	0	0.087	0
X4930500L23Rik		0.008	0.004	0	0	0.005			0	0	0	0
X4930502E09Rik		0.002	0	0	0.002	0			0	0	0	0
X4930502E18Rik		0.014	0.012	0.029	0.033	0.007			0.026	0	0	0
X4930503B20Rik		0.01	0.005	0.002	0.007	0.019			0	0	0.018	0.008
X4930503E14Rik		0	0	0.002	0	0			0	0	0	0
X4930503L19Rik		0.014	0.008	0.004	0.002	0			0	0.014	0.007	0
X4930503O07Rik		0	0	0.004	0.004	0			0	0	0	0
X4930504D19Rik		0.002	0	0	0	0			0	0.009	0	0
X4930504O13Rik		0	0	0	0.004	0			0	0	0	0
X4930505A04Rik		0.002	0.002	0	0.002	0.008			0	0	0	0
X4930505G20Rik		0	0.001	0.008	0	0			0	0	0	0
X4930505K14Rik		0	0	0	0.006	0			0	0	0	0.017
X4930505M18Rik		0.009	0.002	0	0.003	0			0.122	0	0	0
X4930505N22Rik		0.005	0.001	0.005	0.007	0			0.013	0	0	0.015
X4930505O20Rik		0.018	0	0.001	0	0			0	0.031	0.006	0
X4930506C21Rik		0.023	0.015	0.006	0.029	0			0.013	0	0.011	0
X4930507D05Rik		0.032	0.006	0.002	0	0			0.007	0	0	0.01
X4930507D10Rik		0	0.002	0.012	0	0			0	0.028	0	0
X4930509E16Rik		0	0.003	0.012	0.019	0			0	0	0	0.008
X4930509G22Rik		0.101	0.162	0.146	0.187	0.146			0.112	0.193	0.108	0.121
X4930509J09Rik		0.002	0	0.001	0.006	0			0.007	0	0.008	0.012
X4930509K18Rik		0.004	0.004	0.017	0.004	0			0.013	0	0	0
X4930510E17Rik		0	0.002	0.001	0.003	0			0	0	0	0.021
X4930511A02Rik		0.005	0	0.002	0.003	0			0.03	0	0.008	0.019
X4930511E03Rik		0.01	0.004	0.024	0.009	0.016			0.004	0.089	0.007	0.008
X4930511M06Rik		0.22	0.287	0.32	0.339	0.146			0.16	0.285	0.137	0.121
X4930511M18Rik		0	0	0	0	0			0	0	0.014	0
X4930511O05Rik		0	0	0.002	0	0			0	0	0	0
X4930512B01Rik		0.002	0.01	0	0	0.005			0.008	0	0	0
X4930512H18Rik		0	0.005	0.006	0.01	0.005			0	0.01	0	0
X4930512M02Rik		0.002	0	0.001	0	0.032			0.007	0	0	0
X4930513D17Rik		0	0.018	0.007	0	0			0.017	0	0	0
X4930513N10Rik		0.013	0.008	0.007	0.005	0.028			0	0	0	0
X4930513O06Rik		0.002	0	0	0.002	0			0	0	0	0
X4930515B02Rik		0.003	0	0.001	0	0			0	0	0	0
X4930515L19Rik		0	0.002	0.002	0	0			0	0	0	0
X4930516B21Rik		0	0	0	0	0			0	0	0	0
X4930516K23Rik		0	0.01	0	0	0			0.007	0	0	0
X4930517E11Rik		0	0	0.002	0.002	0.01			0	0	0	0
X4930517L18Rik		0	0	0.002	0.004	0			0	0	0	0.015
X4930518C09Rik		0	0	0	0	0			0	0	0.021	0
X4930518I15Rik		0.036	0.02	0.046	0.034	0.068			0.01	0.02	0.009	0.019
X4930519A11Rik		0.002	0.002	0	0.001	0			0	0	0	0
X4930519D14Rik		0.002	0	0	0.001	0			0.01	0.009	0	0
X4930519F09Rik		0.013	0.025	0.003	0.029	0.006			0.028	0.031	0.011	0.011
X4930519F16Rik		0.008	0.007	0.008	0.007	0.01			0.032	0.021	0	0
X4930519F24Rik		0	0	0.005	0.004	0			0	0.02	0	0
X4930519G04Rik		0.005	0.007	0.015	0.004	0			0.027	0	0.011	0.013
X4930519H02Rik		0.015	0	0	0.001	0.007			0.005	0	0	0
X4930519L02Rik		0	0.002	0	0	0			0.018	0	0	0
X4930519P11Rik		0.002	0.002	0	0	0			0	0	0	0
X4930520M14Rik		0	0.005	0	0.006	0			0	0	0	0
X4930520O04Rik		0.017	0.009	0.021	0.019	0.008			0.042	0.046	0.034	0.012
X4930521E06Rik		0	0.003	0.002	0.001	0			0	0	0	0
X4930522H14Rik		0.003	0	0.002	0	0			0	0	0	0
X4930522L14Rik		0.016	0.009	0.011	0.027	0			0.041	0	0.007	0
X4930522N08Rik		0	0.002	0	0	0.04			0	0	0	0
X4930522O17Rik		0.002	0.004	0.002	0.009	0			0	0	0	0
X4930523C07Rik		0.015	0.013	0.017	0.012	0.005			0.006	0.054	0.027	0.026
X4930524B15Rik		0	0	0.002	0.002	0.008			0	0.061	0	0.031
X4930524B17Rik		0.005	0	0.001	0.002	0			0.006	0	0.011	0
X4930524J08Rik		0.002	0.006	0.003	0	0			0.022	0	0.013	0
X4930524N10Rik		0	0.002	0.002	0	0			0	0	0	0
X4930524O07Rik		0.012	0.008	0	0	0.024			0	0	0	0
X4930524O08Rik		0.002	0.008	0	0.007	0			0	0	0	0
X4930525G20Rik		0.01	0.02	0.015	0.019	0.015			0.033	0	0	0
X4930526F13Rik		0.008	0.033	0.012	0.007	0			0.007	0	0.008	0
X4930526L06Rik		0.002	0.009	0	0.004	0.005			0	0	0	0.014
X4930527A07Rik		0	0.004	0	0	0			0	0.022	0	0
X4930527B05Rik		0.002	0.003	0	0	0.01			0	0	0	0
X4930527E20Rik		0.002	0	0	0	0			0	0	0	0
X4930528D03Rik		0.03	0.015	0.01	0.005	0.029			0.011	0	0.016	0.021
X4930528G23Rik		0.003	0.007	0	0.002	0			0	0	0	0
X4930528P14Rik		0	0	0	0.004	0			0.015	0.013	0	0
X4930529I22Rik		0.008	0.013	0.002	0.01	0			0	0	0	0.011
X4930532G15Rik		0	0	0	0	0			0	0	0	0
X4930532M18Rik		0.006	0.012	0.02	0.007	0			0	0	0	0
X4930533B01Rik		0	0	0.002	0	0			0	0	0.007	0
X4930533D04Rik		0.004	0.005	0	0.006	0.006			0.009	0	0	0
X4930533I22Rik		0.009	0.003	0.022	0.007	0			0.013	0	0.018	0.021
X4930533O14Rik		0.482	0.445	0.323	0.335	0.33			0.345	0.189	0.435	0.493
X4930533P14Rik		0	0	0	0	0			0	0	0	0
X4930534D22Rik		0.014	0.005	0.004	0.004	0			0.026	0	0	0
X4930535E02Rik		0	0.008	0.002	0	0			0	0	0	0
X4930535G08Rik		0	0	0	0.001	0			0	0	0	0
X4930535I16Rik		0	0	0	0	0			0	0	0	0
X4930535L15Rik		0	0.005	0	0	0			0	0	0	0
X4930535O05Rik		0.01	0	0	0	0			0	0	0	0
X4930538E20Rik		0	0.002	0	0.003	0			0	0	0	0
X4930538K18Rik		0.02	0.016	0.065	0.024	0.034			0.032	0.062	0.044	0.07
X4930539C22Rik		0	0.002	0.001	0	0			0	0	0	0
X4930539E08Rik		0.031	0.018	0.063	0.094	0.027			0.045	0.113	0	0.109
X4930539J05Rik		0.048	0.101	0.029	0.037	0.033			0	0.07	0.045	0.016
X4930539M17Rik		0.002	0	0	0	0.006			0	0.028	0	0.081
X4930540M05Rik		0.011	0.005	0.008	0	0.021			0	0	0.014	0
X4930542C16Rik		0.002	0.011	0.003	0.032	0			0	0	0	0
X4930544D05Rik		0	0.003	0.003	0	0			0	0	0	0
X4930544G11Rik		0.003	0	0	0	0			0.005	0	0	0
X4930544I03Rik		0	0.007	0	0	0			0	0	0	0
X4930544M13Rik		0.008	0.002	0.01	0.006	0.01			0	0	0	0
X4930545L23Rik		0	0	0.007	0	0.011			0	0.089	0.008	0
X4930547E08Rik		0	0	0.002	0	0			0	0	0	0
X4930547M16Rik		0.009	0	0.009	0.002	0.011			0	0	0	0
X4930548G14Rik		0.007	0.002	0	0	0			0.008	0	0	0
X4930548H24Rik		0.003	0.022	0.034	0.009	0.018			0	0	0.048	0.007
X4930548K13Rik		0	0	0.004	0	0			0	0	0	0
X4930549C01Rik		0	0	0.001	0	0			0	0	0	0
X4930550C14Rik		0	0	0.024	0.007	0			0	0	0	0
X4930550C17Rik		0	0	0.017	0	0			0	0	0	0
X4930550L24Rik		0	0.002	0.002	0	0			0.008	0.072	0	0
X4930551L18Rik		0	0	0	0.002	0			0.011	0	0	0.008
X4930551O13Rik		0.007	0	0.001	0	0			0	0	0	0
X4930552N02Rik		0.019	0.022	0.025	0.021	0.085			0.004	0.022	0.004	0
X4930552P12Rik		0.002	0.005	0	0	0			0	0.051	0	0
X4930553M12Rik		0	0	0.01	0	0			0	0	0	0
X4930553P18Rik		0.028	0.054	0.043	0.067	0.039			0.019	0	0.046	0.015
X4930554C24Rik		0	0	0.005	0	0			0	0	0	0
X4930554G24Rik		0.002	0	0	0.002	0			0	0.017	0	0.008
X4930554H23Rik		0	0.003	0	0	0			0	0	0	0.018
X4930555A03Rik		0.002	0	0.008	0	0.01			0	0	0	0.007
X4930555B11Rik		0.003	0.004	0	0	0			0	0	0	0
X4930555B12Rik		0.014	0	0	0	0			0	0	0	0
X4930555F03Rik		0.069	0.089	0.083	0.096	0.037			0.081	0.036	0.077	0.025
X4930555G01Rik		0	0	0	0	0			0	0	0	0
X4930555M17Rik		0	0.003	0.008	0.007	0			0	0	0	0
X4930555O08Rik		0	0.002	0	0	0			0	0	0	0.015
X4930556G22Rik		0	0	0	0	0			0	0	0	0
X4930556I23Rik		0	0	0	0	0			0	0	0	0
X4930556J24Rik		0	0	0	0	0			0	0	0	0
X4930556L07Rik		0	0	0	0.002	0			0.006	0	0	0
X4930556M19Rik		0.011	0.009	0.02	0.013	0.008			0	0	0	0.017
X4930556N13Rik		0	0.003	0	0.003	0			0.015	0	0.008	0
X4930557A04Rik		0	0	0.004	0.003	0.007			0	0	0	0
X4930557F10Rik		0	0	0	0	0			0	0	0	0
X4930557J02Rik		0	0.002	0.003	0.008	0			0.011	0	0	0
X4930558C23Rik		0	0.006	0.003	0.002	0.007			0	0	0	0
X4930558F17Rik		0	0	0	0	0			0	0	0	0
X4930558J18Rik		0.007	0.003	0.002	0	0			0	0.117	0	0
X4930558J22Rik		0.004	0.005	0.006	0	0.014			0	0	0	0
X4930558K02Rik		0	0	0.001	0.009	0			0.007	0	0.007	0
X4930558N11Rik		0	0	0	0	0			0	0	0	0
X4930562A09Rik		0	0	0.004	0	0			0	0	0	0
X4930562C15Rik		0.044	0.055	0.036	0.01	0.006			0.035	0.016	0.011	0.034
X4930562D21Rik		0	0.004	0	0	0			0	0	0	0.015
X4930562F07Rik		0	0.002	0	0.001	0			0	0	0	0
X4930563D23Rik		0	0	0.007	0.018	0			0	0	0	0
X4930563E18Rik		0.003	0	0	0.009	0.014			0	0	0	0
X4930563E22Rik		0.17	0.177	0.183	0.181	0.14			0.144	0.506	0.292	0.162
X4930563F08Rik		0	0	0	0.015	0			0	0	0	0
X4930563H07Rik		0	0	0	0	0			0	0	0	0
X4930563I02Rik		0	0	0.005	0	0			0	0	0	0
X4930563M21Rik		0	0	0.001	0.005	0			0	0.013	0	0
X4930564D02Rik		0.001	0.003	0.002	0	0			0	0	0	0
X4930565D16Rik		0.002	0.005	0.003	0.001	0			0	0	0	0
X4930565N06Rik		0	0.011	0.002	0.004	0			0	0	0.006	0
X4930566F21Rik		0.002	0.009	0.008	0	0			0.006	0	0	0
X4930567H17Rik		0.02	0.011	0.011	0.009	0			0.019	0	0.007	0
X4930568A12Rik		0	0.004	0.011	0.011	0			0.008	0	0	0
X4930568D16Rik		0.002	0.015	0.009	0.002	0			0	0	0	0.014
X4930568G15Rik		0.005	0	0.005	0.024	0.038			0.004	0.075	0.023	0
X4930570D08Rik		0	0	0	0	0			0	0	0	0
X4930570G19Rik		0.092	0.13	0.258	0.078	0.085			0.135	0.159	0.092	0.084
X4930570N18Rik		0	0.003	0.001	0.012	0			0	0	0	0
X4930571N24Rik		0.002	0.006	0.002	0.001	0			0.009	0	0	0
X4930572K03Rik		0	0	0.004	0.015	0			0	0	0	0
X4930572O03Rik		0	0	0	0	0			0	0	0	0
X4930573C15Rik		0	0	0	0	0			0	0	0	0
X4930573I07Rik		0	0	0	0	0			0	0	0.008	0
X4930577H14Rik		0	0	0	0	0			0	0	0	0
X4930578C19Rik		0	0.002	0	0.003	0			0.015	0	0	0
X4930578G10Rik		0	0.003	0	0.003	0			0	0	0	0
X4930578I06Rik		0.002	0	0.004	0	0			0	0	0	0
X4930578M01Rik		0.054	0.039	0.043	0.019	0.031			0	0	0.073	0.026
X4930579C12Rik		0.016	0.01	0.001	0	0			0	0	0	0
X4930579D09Rik		0	0	0.001	0	0			0	0	0	0.021
X4930579F01Rik		0	0	0.002	0	0			0	0	0	0
X4930579G18Rik		0	0	0.002	0	0			0	0.009	0	0
X4930579G24Rik		0.086	0.081	0.064	0.067	0.175			0.054	0.098	0.113	0.162
X4930579H20Rik		0	0.002	0.001	0	0.007			0.004	0	0	0
X4930579K19Rik		0.003	0.003	0.004	0.003	0.006			0.007	0	0.014	0.009
X4930579M01Rik		0.003	0	0	0.002	0.006			0.004	0.046	0.042	0
X4930579O11Rik		0.003	0.004	0.005	0	0			0	0	0	0
X4930580E04Rik		0	0.007	0.005	0.001	0			0	0	0	0
X4930581F22Rik		0.011	0.008	0.013	0.028	0.014			0.074	0.119	0.031	0.031
X4930583I09Rik		0.004	0	0	0.005	0			0	0	0	0
X4930583K01Rik		0.002	0	0.003	0.01	0			0.025	0	0	0.035
X4930583P06Rik		0.002	0.014	0	0	0			0.008	0	0	0
X4930584F24Rik		0.002	0	0.003	0	0.014			0	0	0	0
X4930586N03Rik		0	0	0.004	0.002	0			0	0.019	0	0
X4930587A21Rik		0	0	0.008	0	0			0	0	0	0
X4930588K23Rik		0.009	0.021	0	0.006	0			0	0	0.007	0
X4930589L23Rik		0	0.004	0.02	0.012	0			0	0	0.008	0
X4930589P08Rik		0	0.003	0	0	0			0	0	0	0
X4930590J08Rik		0.016	0.015	0.034	0.034	0			0	0.023	0	0.015
X4930590L14Rik		0	0.005	0.003	0.003	0			0	0	0	0
X4930590L20Rik		0.004	0	0.001	0.004	0			0	0	0	0
X4930591A17Rik		0.003	0	0	0	0			0	0	0	0
X4930593A02Rik		0.003	0	0.003	0	0			0	0	0	0
X4930593C16Rik		0.019	0.019	0.023	0.026	0			0.012	0	0.006	0.015
X4930594M17Rik		0	0	0	0.006	0			0	0	0	0
X4930594M22Rik		0.039	0.038	0.02	0.057	0.022			0.082	0	0.015	0
X4930594O21Rik		0	0	0	0	0			0	0	0	0
X4930595D18Rik		0	0	0.002	0	0			0	0	0	0
X4930595M18Rik		0.013	0.004	0.003	0.001	0.01			0	0	0	0.013
X4930596D02Rik		0	0.004	0	0.003	0			0	0	0	0
X4930596I21Rik		0.004	0	0.001	0	0			0	0	0.021	0
X4930597A21Rik		0	0.002	0.002	0	0.011			0	0	0	0
X4930597O21Rik		0.007	0.016	0	0.013	0			0	0	0.04	0.01
X4930598A11Rik		0.002	0	0.003	0	0			0.016	0	0	0
X4930598F16Rik		0	0	0.009	0.008	0			0	0	0	0
X4930599A14Rik		0	0	0	0	0			0	0	0	0
X4930599N23Rik		0.002	0.002	0.009	0.008	0			0	0	0	0
X4931400O07Rik		0.002	0	0	0	0			0	0	0	0.017
X4931403E22Rik		0	0.013	0	0.006	0.005			0	0	0	0
X4931403G20Rik		0.003	0	0.005	0.001	0			0	0	0	0
X4931403M11Rik		0.006	0	0	0	0			0	0	0	0
X4931406B18Rik		0.013	0.018	0.023	0.032	0.02			0.011	0	0.02	0
X4931406C07Rik		0.188	0.196	0.116	0.146	0.296			0.328	0.175	0.191	0.139
X4931406G06Rik		0	0	0	0	0			0	0	0.013	0
X4931406P16Rik		0.127	0.181	0.273	0.363	0.098			0.291	0.267	0.133	0.284
X4931408C20Rik		0.003	0.009	0.002	0.004	0.05			0	0	0.013	0
X4931409K22Rik		0	0	0	0	0			0	0	0	0.01
X4931413I07Rik		0	0.003	0.007	0.006	0			0	0	0	0
X4931413K12Rik		0.002	0.001	0.003	0.001	0			0	0	0.007	0
X4931414P19Rik		0.038	0.095	0.069	0.128	0.149			0.032	0.029	0.074	0.09
X4931415C17Rik		0.022	0.016	0.011	0.006	0.02			0.008	0.055	0	0.042
X4931417E11Rik		0	0.004	0.001	0	0			0	0	0	0
X4931419H13Rik		0.003	0	0.002	0	0.01			0.01	0	0	0
X4931422A03Rik		0	0.002	0	0	0			0	0	0.011	0
X4931423N10Rik		0.002	0.006	0.013	0	0			0.015	0.041	0.022	0
X4931428F04Rik		0.287	0.175	0.23	0.268	0.424			0.299	0.33	0.425	0.396
X4931428L18Rik		0	0.002	0.005	0.003	0			0	0	0	0
X4931429L15Rik		0.002	0	0	0.005	0			0	0	0	0.008
X4931429P17Rik		0.002	0	0.003	0	0			0	0	0.019	0
X4931431B13Rik		0	0.006	0.003	0.003	0			0	0	0	0
X4931431C16Rik		0	0	0.003	0	0			0	0.009	0.004	0
X4931431F19Rik		0.002	0	0.003	0	0			0.008	0	0	0
X4931440F15Rik		0.039	0.009	0.025	0.029	0			0.082	0	0.011	0.024
X4931440J10Rik		0	0.002	0.003	0.004	0			0	0	0	0.016
X4931440P22Rik		0.053	0.043	0.053	0.046	0.074			0.056	0.055	0.081	0.007
X4932411E22Rik		0.007	0.007	0.008	0.006	0			0.025	0.041	0	0
X4932411K12Rik		0	0.006	0	0.001	0.012			0.012	0	0.004	0
X4932411N23Rik		0.003	0.002	0.004	0.008	0			0.008	0	0.004	0
X4932412D23Rik		0	0.017	0.007	0.012	0			0	0	0	0.015
X4932413F04Rik		0	0.004	0	0.003	0			0.016	0	0	0
X4932414J04Rik		0	0	0	0	0			0	0	0	0
X4932414N04Rik		0.006	0	0.006	0.001	0.016			0.004	0	0	0
X4932415D10Rik		0	0.002	0	0	0			0	0.027	0.012	0
X4932415M13Rik		0.004	0.019	0	0	0			0.008	0	0	0
X4932429P05Rik		0.002	0	0	0.004	0			0	0	0	0
X4932430I15Rik		0.006	0.013	0.023	0.052	0			0.038	0	0.073	0.015
X4932435O22Rik		0	0.016	0.013	0.009	0.014			0	0	0.014	0.015
X4932438A13Rik		0.976	0.869	0.882	0.902	1.147			1.184	0.987	0.802	1.528
X4932438H23Rik		0.001	0.009	0	0.007	0.01			0.015	0	0.017	0
X4932441J04Rik		0	0.008	0	0	0			0	0	0	0
X4932443I19Rik		0.01	0.028	0.068	0.065	0.004			0.036	0	0.038	0.027
X4932443L11Rik		0.002	0	0.007	0	0.009			0.007	0	0	0
X4932702P03Rik		0.004	0.023	0.024	0.013	0			0.017	0.009	0.046	0.015
X4933400A11Rik		0	0.002	0	0.002	0			0.01	0	0	0
X4933400C23Rik		0	0	0	0.002	0.008			0	0	0	0
X4933400F21Rik		0	0.019	0.003	0.016	0.029			0.007	0	0.036	0
X4933401H06Rik		0	0	0	0.006	0.006			0	0	0	0
X4933402C06Rik		0	0.002	0	0.007	0			0	0	0	0.029
X4933402D24Rik		0.02	0.005	0	0.002	0			0	0	0	0.019
X4933402E13Rik		0	0.001	0.013	0	0.007			0	0	0	0
X4933402J07Rik		0	0	0.004	0.001	0			0	0	0	0
X4933402J10Rik		0	0	0	0	0			0	0	0	0.015
X4933402N03Rik		0	0	0.004	0.002	0			0	0	0.01	0
X4933402N22Rik		0	0	0	0	0			0	0	0	0
X4933402P03Rik		0	0.002	0.002	0	0			0	0	0.01	0
X4933403O08Rik		0	0.004	0	0	0			0	0.013	0	0
X4933404I11Rik		0	0.004	0.001	0	0			0	0	0	0
X4933404K08Rik		0.004	0	0	0.021	0			0.014	0	0	0
X4933404O12Rik		0.029	0.091	0.108	0.061	0.024			0.117	0.016	0.072	0.064
X4933405D12Rik		0.088	0.146	0.079	0.117	0.122			0.138	0.178	0.16	0.063
X4933405E24Rik		0.006	0	0	0.005	0			0	0	0	0
X4933405L10Rik		0	0.003	0	0.002	0.009			0	0	0.023	0
X4933405O20Rik		0.001	0.002	0.001	0	0.008			0	0	0	0
X4933406C10Rik		0	0.002	0.017	0.024	0.006			0	0	0.009	0
X4933406D12Rik		0	0	0.001	0.002	0			0	0	0	0
X4933406F09Rik		0	0	0	0	0			0	0	0	0
X4933406G16Rik		0	0	0	0	0			0.009	0	0	0
X4933406I18Rik		0.017	0.036	0.017	0.063	0.025			0.037	0	0.023	0.01
X4933406J08Rik		0.026	0	0.002	0	0.005			0	0	0	0
X4933406J10Rik		0	0	0.005	0	0			0	0	0	0
X4933406K04Rik		0	0.003	0.001	0.002	0			0	0	0	0
X4933406M09Rik		0	0	0.003	0.002	0			0	0	0	0
X4933406P04Rik		0.019	0	0.01	0.006	0			0.007	0	0.007	0
X4933407E24Rik		0	0	0.002	0	0			0	0	0	0
X4933407I08Rik		0	0.002	0	0.002	0.013			0.012	0	0	0
X4933407K13Rik		0.023	0.028	0.03	0.016	0.016			0.022	0.031	0.038	0.023
X4933407L21Rik		0.046	0.141	0.442	0.222	0.088			0.009	0.032	0.181	0.143
X4933408A14Rik		0	0.002	0.003	0	0.005			0	0	0	0
X4933408B17Rik		0.006	0.047	0.062	0.073	0.031			0.109	0	0.032	0.023
X4933408J17Rik		0.005	0.002	0	0.004	0			0.036	0	0	0
X4933409D19Rik		0	0	0	0	0			0.012	0	0	0
X4933409G03Rik		0	0	0.007	0.002	0			0	0	0	0
X4933411G06Rik		0	0.002	0.002	0	0			0	0	0	0
X4933411K16Rik		0.003	0.006	0	0	0			0	0	0	0
X4933411O13Rik		0	0	0	0	0			0	0	0	0
X4933412E24Rik		0	0.002	0.002	0	0			0.021	0.018	0	0
X4933413C19Rik		0.002	0.003	0	0.006	0			0.018	0	0.013	0
X4933413G19Rik		0	0.003	0	0.002	0			0	0	0	0
X4933413J09Rik		0.01	0	0.002	0.025	0			0	0	0	0
X4933413L06Rik		0.002	0	0.016	0.008	0			0	0	0.01	0
X4933414I15Rik		0.002	0	0.013	0.007	0			0.019	0.017	0	0
X4933415A04Rik		0	0	0.005	0.005	0.014			0	0.02	0	0
X4933415F23Rik		0	0	0.002	0	0.007			0	0	0	0
X4933416C03Rik		0	0.002	0.01	0	0			0	0	0	0
X4933416E03Rik		0.003	0.015	0	0	0			0	0	0	0
X4933416M07Rik		0	0.011	0	0.013	0.007			0	0	0	0
X4933417A18Rik		0	0	0	0.003	0			0	0	0	0
X4933417D19Rik		0.012	0.006	0.016	0	0			0	0	0	0
X4933417E11Rik		0.003	0	0	0	0			0	0	0	0
X4933417O13Rik		0.003	0	0.003	0	0			0.012	0	0	0
X4933421A08Rik		0.002	0	0	0	0			0	0	0.014	0
X4933421I07Rik		0	0	0.003	0	0			0	0.025	0	0
X4933421O10Rik		0.222	0.245	0.337	0.278	0.183			0.267	0.137	0.311	0.18
X4933423P22Rik		0.01	0.019	0.033	0.009	0.026			0.02	0.067	0.021	0
X4933424G06Rik		0	0	0	0	0			0.007	0.035	0	0
X4933424M12Rik		0.01	0	0.002	0.011	0			0	0	0	0
X4933425L06Rik		0	0	0.008	0	0			0	0	0	0
X4933426K07Rik		0	0.002	0	0	0			0.004	0	0	0.005
X4933427D06Rik		0.038	0.04	0.041	0.062	0.011			0.019	0	0.103	0.06
X4933427D14Rik		0.116	0.102	0.19	0.146	0.154			0.24	0.366	0.127	0.098
X4933427E13Rik		0.006	0.004	0	0.005	0			0	0	0	0
X4933427G17Rik		0.058	0.058	0.129	0.055	0.008			0.016	0	0.037	0.05
X4933427G23Rik		0.025	0.006	0.003	0.016	0			0.044	0	0	0
X4933427I04Rik		0.067	0.108	0.121	0.119	0.021			0.265	0.266	0.137	0.092
X4933427I22Rik		0.003	0	0.004	0.001	0			0.006	0	0	0
X4933427J07Rik		0.044	0.017	0.014	0.019	0.015			0.017	0.113	0.055	0
X4933428C19Rik		0	0	0	0	0			0	0	0	0
X4933428G20Rik		0	0.009	0	0	0			0	0	0	0.014
X4933428M09Rik		0.002	0.002	0	0.008	0			0	0	0	0
X4933430I17Rik		0.002	0.004	0.016	0	0			0.007	0	0	0
X4933430L12Rik		0	0	0	0.001	0			0.008	0	0	0
X4933430M04Rik		0	0.002	0.002	0	0			0	0	0	0
X4933431E20Rik		1.086	0.685	0.618	0.574	0.548			0.851	1.01	0.635	0.75
X4933431G14Rik		0	0	0	0.002	0			0	0	0.004	0
X4933431K23Rik		0.007	0.008	0.008	0.022	0.032			0.008	0.017	0.01	0
X4933431M02Rik		0.002	0.002	0.002	0	0			0	0	0	0.017
X4933432K03Rik		0.013	0.003	0.001	0.001	0			0	0	0	0.011
X4933433F19Rik		0.004	0.003	0	0	0			0	0	0.012	0
X4933433G15Rik		0.007	0.005	0.001	0.005	0			0	0	0	0
X4933434E20Rik		1.046	0.936	0.934	1.013	1.121			1.108	1.186	1.051	1.252
X4933434M16Rik		0.002	0.002	0.002	0	0.006			0	0	0.013	0
X4933435F18Rik		0.006	0.011	0.045	0.015	0.006			0	0.023	0	0.022
X4933436E23Rik		0	0	0.002	0	0			0	0	0	0.006
X4933436I01Rik		0	0	0.002	0	0			0	0	0	0.015
X4933436I20Rik		0.002	0	0.001	0.002	0			0	0	0	0
X4933438A12Rik		0	0.002	0	0	0.011			0	0	0	0
X4933438B17Rik		0.004	0	0	0	0			0	0	0	0
X4933438K21Rik		0.004	0.002	0	0.005	0.01			0	0	0	0
X4933439C10Rik		0.155	0.173	0.323	0.201	0.278			0.215	0.3	0.237	0.184
X4933439K11Rik		0	0.002	0.007	0	0.009			0	0.069	0.005	0.019
X4933440J02Rik		0.007	0.002	0	0	0.006			0	0	0	0
X4933440M02Rik		0.005	0.02	0.011	0.014	0.012			0	0	0.008	0.013
X5031410I06Rik		0	0.002	0	0	0			0	0	0	0
X5031414D18Rik		0.006	0.007	0.006	0.007	0			0.006	0	0	0
X5031415H12Rik		0.002	0.005	0.008	0.001	0			0	0	0	0
X5031425E22Rik		0.005	0.029	0.022	0.067	0.009			0.024	0	0.044	0
X5031425F14Rik		0.005	0.013	0.054	0.017	0.006			0	0.045	0.006	0.006
X5031434C07Rik		0.003	0.016	0.001	0.004	0			0	0	0.007	0
X5031434O11Rik		0.073	0.111	0.155	0.107	0.057			0.077	0.08	0.08	0.079
X5031439G07Rik		0.261	0.31	0.279	0.393	0.349			0.769	0.686	0.344	0.472
X5033403F01Rik		0	0	0.002	0.008	0			0	0	0	0
X5033403H07Rik		0	0.009	0.006	0.008	0.022			0	0	0	0.006
X5033404E19Rik		0	0	0.004	0.004	0.008			0	0	0	0
X5033417F24Rik		0.018	0.003	0.018	0.028	0.054			0	0	0.023	0
X5033426O07Rik		0.002	0.004	0.005	0.006	0			0.004	0	0.018	0
X5033428I22Rik		0.002	0.002	0.009	0.003	0			0.007	0	0.006	0.007
X5033430I15Rik		0.03	0.033	0.026	0.041	0.018			0.069	0.178	0.017	0.008
X5330411J11Rik		0.01	0	0.001	0.011	0			0	0	0.018	0.023
X5330411O13Rik		0	0	0	0.006	0			0.048	0	0	0
X5330413P13Rik		0.004	0.038	0.055	0.035	0.022			0.037	0.039	0.009	0.053
X5330416C01Rik		0.002	0.015	0.013	0.007	0.01			0	0	0	0
X5330417C22Rik		0.078	0.085	0.183	0.181	0.197			0.146	0.031	0.131	0.293
X5330417H12Rik		0	0	0.004	0	0			0.006	0	0	0
X5330429C05Rik		0.002	0.002	0.005	0.001	0.013			0.027	0	0	0
X5330434G04Rik		0.297	0.271	0.301	0.211	0.304			0.448	0.558	0.448	0.154
X5330439A09Rik		0.007	0.002	0.015	0.005	0.019			0	0	0.08	0.027
X5330439B14Rik		0.002	0	0.001	0.005	0			0	0	0	0
X5330439K02Rik		0.002	0.017	0.01	0.003	0.016			0	0	0.021	0
X5430400D12Rik		0.005	0	0.012	0.02	0.017			0.009	0	0	0.033
X5430401F13Rik		0	0	0	0	0			0	0	0	0
X5430402E10Rik		0	0	0	0	0			0	0	0	0
X5430402O13Rik		0.012	0.006	0.018	0.022	0.012			0	0	0.036	0.034
X5430405H02Rik		0.022	0.073	0.068	0.072	0.068			0.032	0.036	0.037	0.072
X5430416N02Rik		0.147	0.086	0.3	0.155	0.151			0.111	0.122	0.175	0.184
X5430416O09Rik		0.007	0.002	0.024	0.006	0.265			0.005	0.05	0	0
X5430419D17Rik		0	0.003	0.005	0.005	0.01			0	0	0.057	0
X5430427O19Rik		0.001	0.003	0	0.01	0.013			0.011	0	0	0.01
X5430434I15Rik		0	0	0	0.001	0.01			0	0	0	0.007
X5530400C23Rik		0.003	0	0	0	0			0.009	0.017	0	0
X5530401A14Rik		0.014	0.015	0.003	0.01	0			0.012	0	0	0
X5530601H04Rik		0.419	0.598	0.428	0.418	0.523			0.447	0.261	0.513	0.332
X5730403I07Rik		0	0.006	0	0.001	0.032			0.044	0.032	0	0
X5730405O15Rik		0.021	0.002	0.002	0.001	0			0	0	0	0.076
X5730409E04Rik		0.906	0.63	0.46	0.372	0.652			0.755	0.338	0.551	0.502
X5730419F03Rik		0.003	0.004	0.005	0	0			0	0	0	0
X5730420D15Rik		0.002	0	0	0	0			0	0	0	0.016
X5730422E09Rik		0.003	0	0.01	0.003	0.013			0.022	0	0.011	0
X5730435O14Rik		0	0.002	0	0	0			0.048	0	0	0
X5730455P16Rik		1.045	1.148	1.237	0.993	1.279			1.692	1.408	1.218	1.339
X5730460C07Rik		0.003	0.002	0.002	0.001	0			0	0	0.03	0
X5730480H06Rik		0.211	0.152	0.24	0.229	0.212			0.19	0.178	0.22	0.145
X5730507C01Rik		0.009	0.005	0.006	0.008	0.036			0.018	0.042	0.022	0.007
X5730508B09Rik		0.618	0.597	0.83	0.772	1.175			0.035	0.02	0.225	0.039
X5730522E02Rik		0	0	0.003	0.003	0.007			0	0	0	0.008
X5730559C18Rik		0.009	0.015	0.01	0.022	0			0	0.032	0	0.024
X5730596B20Rik		0.001	0.006	0.01	0	0			0.022	0	0.007	0
X5830405F06Rik		0.006	0.004	0.001	0.013	0			0	0	0	0
X5830411N06Rik		0.009	0.005	0.003	0.003	0			0	0	0	0
X5830416I19Rik		0.005	0.002	0.001	0.007	0			0	0.024	0.019	0.007
X5830418P13Rik		0.016	0.008	0.018	0.063	0.098			0.018	0	0.049	0.087
X5830432E09Rik		0	0.002	0.001	0.004	0			0	0.031	0.019	0.008
X5830444B04Rik		0.011	0.042	0.024	0.016	0.015			0	0.022	0.008	0.006
X5830454E08Rik		0.01	0.044	0.042	0.076	0.045			0.023	0.104	0.051	0.031
X5830468F06Rik		0.003	0.002	0.002	0.001	0			0.005	0	0	0.01
X5930403N24Rik		0.005	0	0.028	0.01	0			0.005	0	0	0
X5930412G12Rik		0.006	0.002	0.006	0.017	0.054			0.013	0	0.017	0
X5930422O12Rik		0.062	0.06	0.015	0.011	0.019			0.028	0	0	0.008
X5930430L01Rik		0.026	0.031	0.086	0.043	0.225			0.085	0	0.036	0.112
X6030407O03Rik		0	0	0.005	0	0			0.01	0	0	0
X6030408B16Rik		0.03	0.085	0.066	0.03	0.015			0.03	0.037	0.038	0.026
X6030419C18Rik		3.465	2.236	0.471	0.897	1.041			0.585	0.528	0.906	1.332
X6030442E23Rik		0	0	0	0	0			0.009	0	0	0
X6030442K20Rik		0.014	0.012	0.013	0.003	0.016			0.025	0.031	0.011	0
X6030443J06Rik		0.288	0.352	0.328	0.386	0.269			0.543	0.354	0.408	0.336
X6030445D17Rik		0.004	0.007	0.002	0	0			0.009	0.032	0.004	0
X6030452D12Rik		0.003	0.002	0.003	0	0			0	0	0	0
X6030458C11Rik		0.207	0.376	0.169	0.292	0.234			0.168	0.19	0.211	0.446
X6030468B19Rik		0	0.002	0.001	0.005	0			0	0	0	0
X6030469F06Rik		0.003	0	0	0	0			0	0	0	0
X6030471H07Rik		0	0	0	0	0			0.018	0	0	0.017
X6030498E09Rik		0	0	0.003	0.002	0.012			0	0	0	0
X6230400D17Rik		0.038	0.08	0.049	0.127	0.041			0.039	0	0.032	0.018
X6330403A02Rik		0.167	0.183	0.129	7.106	13.899			1.142	0.373	0.353	0.041
X6330403K07Rik		1.169	2.471	6.148	8.484	7.915			12.857	13.131	14.505	12.28
X6330403N20Rik		0.015	0.016	0.038	0.013	0			0.008	0	0.072	0
X6330408A02Rik		0.212	0.255	0.142	0.266	0.12			0.129	0.329	0.202	0.518
X6330409D20Rik		0.035	0.086	0.039	0.068	0.093			0.279	0.108	0.083	0.274
X6330410L21Rik		0.126	0.027	0.011	0.018	0.008			0.006	0	0.005	0
X6330416G13Rik		0.127	0.091	0.062	0.093	0.099			0.16	0.346	0.07	0.121
X6330418K02Rik		0.079	0.094	0.082	0.047	0.132			0.084	0.034	0.051	0.015
X6330549D23Rik		0.035	0.028	0.018	0.031	0.035			0.007	0	0.026	0
X6330562C20Rik		0.088	0.068	0.09	0.066	0.102			0.035	0	0.032	0.037
X6430503K07Rik		0	0	0	0	0			0	0	0	0
X6430531B16Rik		0.012	0	0.024	0.016	0			0	0.023	0.013	0
X6430548M08Rik		0.841	0.577	0.441	0.444	0.606			1.092	1.213	0.594	0.185
X6430550D23Rik		0.029	0.015	0.023	0.018	0			0	0.024	0.025	0
X6430562O15Rik		0.02	0.014	0.014	0.022	0.015			0	0	0.072	0.041
X6430571L13Rik		0.144	0.051	0.062	0.214	0.192			0.124	0.234	0.158	0.349
X6430573F11Rik		0.189	0.132	0.082	0.143	0.131			0.104	0.2	0.156	0.49
X6430584L05Rik		0	0	0.002	0.007	0			0.035	0	0	0
X6430590A07Rik		0.017	0.014	0.013	0.027	0.031			0.005	0	0.02	0.047
X6430628N08Rik		0.007	0.008	0.047	0.192	0.012			0.008	0	0.009	0
X6430710C18Rik		0.002	0.002	0.007	0.003	0.011			0.009	0.028	0	0
X6530401F13Rik		0.009	0.006	0.006	0	0			0.007	0	0	0
X6530402F18Rik		0.006	0.012	0.026	0.014	0.016			0.025	0	0.026	0.035
X6530403H02Rik		0.019	0.025	0.021	0.02	0.019			0.028	0	0.016	0.025
X6530409C15Rik		0.005	0.003	0.005	0	0.007			0	0	0	0.03
X6530411M01Rik		0.006	0	0	0.002	0			0.007	0	0.01	0
X6720483E21Rik		0.04	0.003	0.022	0.001	0.015			0.033	0	0.01	0
X6720489N17Rik		0.041	0.044	0.038	0.04	0.095			0.035	0.017	0.114	0.012
X6820408C15Rik		0.03	0.004	0.064	0.04	0.024			0	0	0.092	0.056
X6820431F20Rik		0.559	0.799	0.744	0.714	0.647			0.858	0.742	0.661	0.532
X7330404K18Rik		0	0	0	0	0			0	0	0	0
X7420426K07Rik		0.008	0	0	0.002	0			0	0	0.01	0
X7420461P10Rik		0.003	0	0	0	0			0	0	0	0
X7530416G11Rik		0.001	0.003	0.013	0.002	0			0	0.014	0	0
X7530428D23Rik		0.003	0	0.002	0.008	0			0.007	0	0	0
X7630403G23Rik		0.003	0.003	0	0	0			0.01	0	0	0
X8030411F24Rik		0	0	0	0	0			0	0	0	0
X8030423F21Rik		0.004	0.011	0.006	0.007	0.005			0	0	0.021	0
X8030423J24Rik		0.003	0	0	0.002	0			0	0	0	0
X8030442B05Rik		0.001	0	0.003	0.002	0			0	0	0	0
X8030443G20Rik		0	0	0.009	0.008	0			0	0	0	0
X8030451A03Rik		0.012	0.018	0.007	0.008	0.009			0.012	0	0.023	0.006
X8030453O22Rik		0.008	0.016	0.002	0	0			0	0	0.012	0
X8030462N17Rik		0.005	0.023	0.003	0.002	0.016			0.042	0	0.008	0.008
X8030474K03Rik		0.005	0.008	0	0.003	0			0.05	0.041	0	0.01
X8430408G22Rik		0.002	0	0.002	0.004	0			0	0	0	0
X8430423G03Rik		0	0	0	0	0.011			0	0	0	0
X8430429K09Rik		0.212	0.205	0.139	0.126	0.13			0.099	0	0.07	0.135
X8430436N08Rik		0	0	0	0.001	0			0	0	0	0
X8430437L04Rik		0	0	0.002	0	0			0	0	0	0.008
X9030204H09Rik		0.003	0	0.005	0.003	0			0.012	0.016	0	0
X9030407P20Rik		0.125	0.147	0.101	0.069	0.031			0.029	0	0.112	0.075
X9030612E09Rik		0.003	0.006	0.019	0.013	0.012			0.074	0.019	0.021	0.038
X9030616G12Rik		0.003	0	0	0	0			0	0	0	0
X9030617O03Rik		0.055	0.06	0.05	0.092	0.167			0.107	0.189	0.083	0.195
X9030619P08Rik		0.006	0	0.003	0	0			0	0	0	0
X9030622O22Rik		0	0.002	0	0	0			0	0	0	0.008
X9030624G23Rik		0	0	0	0.004	0.009			0	0	0	0
X9030624J02Rik		0.529	0.559	0.472	0.542	0.446			0.726	0.444	0.584	0.465
X9130008F23Rik		0.001	0	0	0	0			0	0	0	0
X9130015L21Rik		0	0.002	0.008	0.006	0			0.013	0	0	0
X9130017K11Rik		0.003	0	0.002	0.009	0			0.007	0.107	0	0
X9130019O22Rik		0.017	0.019	0.015	0.036	0.02			0.005	0	0.05	0.017
X9130019P16Rik		0.003	0.002	0.007	0.004	0.006			0.006	0	0.026	0
X9130023H24Rik		0.055	0.06	0.093	0.02	0.091			0.006	0	0.027	0.03
X9130024F11Rik		0.006	0.002	0.004	0.008	0			0.004	0.031	0	0
X9130204K15Rik		0.002	0.004	0.002	0.008	0			0	0	0.015	0
X9130204L05Rik		0	0	0	0	0			0	0	0	0
X9130213A22Rik		0.015	0	0.004	0.001	0			0	0.046	0	0
X9130221F21Rik		0.005	0.011	0.016	0.008	0.033			0	0	0.056	0.037
X9130221H12Rik		0.033	0.053	0.064	0.061	0.025			0.054	0.02	0.072	0.037
X9130227L01Rik		0	0.011	0.006	0	0			0	0	0	0
X9130230L23Rik		0.049	0.075	0.102	0.165	0.061			0.054	0.172	0.166	0.062
X9130401M01Rik		0.163	0.283	0.247	0.263	0.19			0.188	0.114	0.209	0.165
X9130409I23Rik		0	0.005	0	0.028	0			0	0	0	0.017
X9130409J20Rik		0	0.002	0	0.003	0			0.01	0	0	0
X9130410C08Rik		0	0	0	0	0			0	0	0	0
X9230009I02Rik		0	0	0	0	0			0.013	0	0	0
X9230019H11Rik		0.003	0	0	0	0			0	0.023	0.01	0.008
X9230020A06Rik		0	0	0	0	0			0.013	0	0	0
X9230102O04Rik		0.005	0.007	0	0.005	0			0	0	0	0
X9230104L09Rik		0	0	0	0	0			0	0	0	0
X9230104M06Rik		0.002	0.004	0.001	0.004	0.005			0	0	0.027	0
X9230105E05Rik		0.14	0.127	0.145	0.158	0.283			0.096	0.046	0.081	0.206
X9230109A22Rik		0	0.009	0.017	0.004	0.008			0	0.057	0.014	0.015
X9230110C19Rik		0.011	0.077	0.099	0.043	0.063			0.013	0.053	0.029	0.015
X9230110F15Rik		0	0	0.006	0	0			0	0	0	0
X9230111E07Rik		0.004	0.007	0.017	0.007	0			0	0	0	0
X9230112D13Rik		0	0	0.003	0	0.008			0	0	0	0
X9230113P08Rik		0.002	0.008	0.004	0.005	0			0	0.01	0.008	0
X9230114J08Rik		0	0.002	0.004	0.002	0.01			0	0	0	0
X9230114K14Rik		0.162	0.145	0.125	0.183	0.2			0.122	0.181	0.399	0.178
X9230116N13Rik		0.004	0	0.007	0.007	0.008			0	0	0	0
X9230117E06Rik		0	0.002	0	0	0.006			0.01	0	0	0
X9330020H09Rik		0.043	0.031	0.038	0.033	0.074			0.053	0.062	0.032	0.014
X9330102E08Rik		0.07	0.044	0.05	0.048	0.077			0.086	0.139	0.055	0.033
X9330104G04Rik		0.05	0.034	0.047	0.075	0.059			0.033	0.054	0.009	0.032
X9330111N05Rik		0.005	0.009	0.015	0	0			0	0	0	0
X9330118I20Rik		0	0	0.001	0	0			0.005	0	0	0
X9330136K24Rik		0.036	0.064	0.084	0.08	0.068			0.06	0.071	0.094	0.075
X9330151L19Rik		0.477	0.26	0.421	0.275	0.289			0.229	0.266	0.328	0.358
X9330154J02Rik		0.021	0	0.012	0.014	0.008			0.007	0	0	0
X9330158H04Rik		0.034	0.03	0.033	0.013	0.008			0.122	0.062	0.13	0.107
X9330159F19Rik		1.092	1.264	1.11	1.11	1.553			1.326	1.009	0.97	1.049
X9330159M07Rik		0.071	0.055	0.064	0.111	0.086			0.119	0.072	0.007	0.04
X9330161L09Rik		0.017	0.041	0.014	0.042	0.033			0.022	0.017	0.04	0.008
X9330162012Rik		0.105	0.102	0.11	0.107	0.05			0.216	0.169	0.153	0.145
X9330162B11Rik		0	0	0.002	0.003	0			0.004	0	0.006	0
X9330175E14Rik		0.005	0.014	0.01	0.008	0.018			0.011	0	0.089	0.01
X9330175M20Rik		0.004	0.004	0.003	0.003	0			0	0	0	0
X9330178D15Rik		0	0.001	0.087	0.012	0			0.01	0	0.205	0.038
X9330179D12Rik		0.003	0.003	0.005	0.002	0			0	0.117	0	0
X9330182L06Rik		0.683	0.475	0.406	0.36	0.109			0.347	0.651	0.884	0.465
X9330185C12Rik		0	0.006	0.005	0	0			0	0.017	0	0
X9330198N18Rik		0.002	0.01	0	0.003	0			0.036	0	0.012	0
X9430007A20Rik		0	0.003	0	0.008	0.011			0	0	0.015	0
X9430015G10Rik		0.143	0.186	0.081	0.175	0.103			0.259	0.175	0.24	0.208
X9430016H08Rik		0.38	0.579	0.544	0.537	0.675			0.665	0.496	0.456	0.296
X9430018G01Rik		0.004	0	0	0.006	0.01			0	0	0.012	0.017
X9430021M05Rik		0	0.003	0.002	0.015	0			0.066	0.032	0.004	0.005
X9430024E24Rik		0.002	0	0.002	0	0			0	0	0	0
X9430037G07Rik		0.027	0.026	0.029	0.054	0.014			0.043	0.021	0	0
X9430038I01Rik		0.031	0.033	0.041	0.045	0.035			0.07	0.054	0.062	0
X9430041J12Rik		0.003	0.015	0.018	0.006	0			0.015	0.021	0.043	0
X9430060I03Rik		0.014	0.023	0.028	0.032	0			0.052	0.046	0.098	0.045
X9430065F17Rik		0.04	0.056	0.039	0.055	0.058			0.019	0	0	0
X9430073C21Rik		0	0.003	0.015	0.011	0			0	0.014	0	0.011
X9430076C15Rik		0.028	0.071	0.064	0.079	0.081			0.042	0	0.004	0.026
X9430091E24Rik		0.005	0.01	0.005	0.014	0.02			0	0	0.021	0.039
X9430093N23Rik		0	0.003	0	0	0			0	0	0	0
X9430097D07Rik		0.003	0.006	0.01	0.008	0.01			0.009	0	0.012	0
X9530002B09Rik		0.011	0.003	0	0.004	0.009			0	0	0	0.015
X9530003J23Rik		0.003	0	0	0	0.01			0	0	0	0
X9530026F06Rik		0.017	0.036	0.004	0.019	0.026			0.005	0	0.074	0.027
X9530026P05Rik		0.038	0.02	0.009	0.014	0.014			0.067	0.104	0.024	0.007
X9530027J09Rik		0	0.001	0.001	0	0			0	0	0	0
X9530034A14Rik		0.009	0	0	0.004	0			0	0	0.011	0
X9530034E10Rik		0	0	0	0	0			0	0	0	0
X9530036M11Rik		0	0.003	0.009	0.007	0.021			0.008	0	0.007	0
X9530036O11Rik		0.005	0	0.004	0.013	0			0.015	0	0.006	0.011
X9530046B11Rik		0.009	0.006	0.01	0.014	0.013			0	0.043	0	0
X9530051G07Rik		0.007	0.023	0.014	0.019	0.038			0.038	0.059	0.032	0.108
X9530052C20Rik		0	0.005	0	0	0			0	0.02	0.004	0
X9530052E02Rik		0.005	0.041	0.016	0.019	0.028			0	0	0	0.01
X9530059O14Rik		0.004	0.026	0.005	0.012	0.017			0.072	0	0.016	0
X9530062K07Rik		0.06	0.086	0.063	0.019	0.042			0.082	0	0.004	0.052
X9530068E07Rik		0.962	1.059	1.165	1.052	1.168			1.361	1.515	1.618	0.953
X9530077C05Rik		0.092	0.15	0.145	0.155	0.025			0.191	0.021	0.141	0.14
X9530080O11Rik		0.013	0.01	0.008	0.025	0			0	0.013	0.019	0.011
X9530082P21Rik		0.069	0.058	0.057	0.069	0.036			0.082	0.051	0.046	0.056
X9630001P10Rik		0.012	0.006	0.017	0.004	0.013			0.031	0	0.015	0
X9630013D21Rik		0.006	0.003	0.002	0	0			0	0	0	0
X9630013K17Rik		0	0	0.003	0	0			0.007	0	0	0
X9630028B13Rik		0.029	0.012	0.025	0.027	0.024			0.043	0.054	0.042	0.027
X9630028H03Rik		0.002	0	0.007	0.012	0.005			0.006	0	0	0
X9630041A04Rik		0	0	0.005	0	0			0	0	0	0
X9830004L10Rik		0.023	0.008	0.018	0.017	0.015			0	0	0.016	0.035
X9830107B12Rik		0	0	0	0.015	0.013			0	0	0.017	0
X9830132P13Rik		0.012	0.012	0.003	0.033	0			0.025	0.187	0	0
X9830144P21Rik		0.003	0.006	0.005	0.022	0.012			0	0.023	0.004	0
X9830147E19Rik		0.065	0.031	0.02	0.084	0.034			0.066	0	0.054	0.04
X9930012K11Rik		0.005	0.016	0.034	0.029	0.012			0.015	0.051	0.009	0
X9930014A18Rik		0.076	0.044	0.047	0.11	0.572			0	0.076	0.103	0.14
X9930022D16Rik		0.009	0.004	0.008	0.019	0.026			0.008	0	0	0.033
X9930038B18Rik		0	0.002	0.001	0.013	0			0	0	0	0
X9930104L06Rik		0.232	0.322	0.222	0.307	0.269			0.249	0.124	0.3	0.46
X9930111H07Rik		0.099	0.182	0.123	0.179	0.198			0.144	0.054	0.179	0.063
X9930111J21Rik1		0	0	0	0	0			0	0.026	0	0
X9930111J21Rik2		0.713	1.182	1.257	1.228	1.466			1.317	1.392	1.415	1.18
A130010J15Rik		0.069	0.098	0.143	0.23	0.185			0.981	0.742	0.389	0.14
A130023I24Rik		0.001	0.005	0.009	0.002	0			0	0	0.017	0
A130030D18Rik		0	0.003	0	0.005	0			0	0	0	0
A130051J06Rik		0.013	0.011	0.002	0.005	0			0	0	0.008	0
A130057D12Rik		0.002	0.005	0	0.014	0.005			0	0.018	0.01	0
A1bg		0	0	0	0	0.006			0	0	0	0
A1cf		0	0.007	0.002	0.006	0			0.013	0.028	0.011	0.015
A230001M10Rik		0	0.014	0.018	0.011	0			0.008	0	0.008	0.019
A230004M16Rik		0	0.006	0.002	0.007	0			0.008	0.009	0	0
A230005M16Rik		0.005	0.004	0	0	0			0	0	0	0
A230009B12Rik		0.008	0.009	0.009	0.018	0			0	0.014	0	0
A230020J21Rik		0	0.006	0	0	0			0	0.019	0.004	0
A230028O05Rik		0.004	0.001	0.007	0.018	0			0.009	0.018	0.009	0.016
A230050P20Rik		1.184	1.125	1.314	1.31	1.156			1.549	1.439	1.469	1.783
A230052G05Rik		0.002	0.007	0	0.003	0.006			0	0.031	0	0
A230056P14Rik		0.05	0.027	0.023	0.02	0.034			0.06	0.022	0.085	0.046
A230059L01Rik		0.291	0.256	0.293	0.407	0.341			0.243	0.183	0.281	0.136
A230065H16Rik		0	0	0.007	0.002	0			0.271	0.418	0.027	0.01
A230072C01Rik		0.004	0.004	0.011	0.022	0.005			0.014	0	0	0
A230072E10Rik		0.069	0.228	0.052	0.04	0.057			0.072	0.059	0.02	0.043
A230072I06Rik		0	0.002	0.004	0.001	0			0	0	0	0
A230077H06Rik		0.058	0.083	0.187	0.193	0.119			0.15	0.042	0.089	0.204
A230083G16Rik		0.008	0.002	0.03	0.002	0.005			0	0	0.026	0.116
A230087F16Rik		0.023	0.088	0.145	0.112	0.153			0.199	0.23	0.136	0.032
A230103J11Rik		0.021	0.03	0.021	0.016	0.011			0.034	0.018	0.046	0.013
A230107N01Rik		0.023	0.03	0.003	0.008	0			0.012	0.031	0.028	0.01
A230108P19Rik		0.004	0.008	0.007	0	0.018			0.006	0	0	0
A2m		0.005	0.007	0.002	0.001	0			0.025	0	0	0.129
A330008L17Rik		0.158	0.096	0.048	0.067	0.058			0.083	0.073	0.047	0.036
A330009N23Rik		0.002	0.004	0	0.026	0			0.006	0.018	0.011	0
A330015K06Rik		0.003	0.014	0	0.011	0			0	0	0.009	0
A330017A19Rik		0.043	0.029	0.047	0.044	0.084			0.282	0.066	0.124	0.054
A330023F24Rik		0.456	0.375	0.463	0.472	0.377			0.438	0.561	0.548	0.224
A330032B11Rik		0.049	0.118	0.155	0.126	0.113			0.099	0.056	0.088	0.201
A330033J07Rik		0.013	0.012	0.047	0.024	0.014			0.065	0.01	0.052	0.033
A330035P11Rik		0.015	0.019	0.017	0.012	0.015			0.015	0	0	0.043
A330040F15Rik		0.015	0.005	0.026	0.004	0			0	0	0.021	0
A330041J22Rik		0.012	0.067	0.028	0.008	0.028			0.004	0.085	0.02	0.044
A330043C09Rik		0	0	0	0.003	0			0	0	0	0
A330044P14Rik		0.069	0.112	0.096	0.115	0.167			0.129	0.072	0.095	0.079
A330048O09Rik		0.008	0.014	0.01	0.008	0			0	0	0.032	0
A330069E16Rik		0.034	0.042	0.1	0.07	0.039			0.088	0.084	0.08	0.068
A330069K06Rik		0	0	0.001	0.002	0			0	0.009	0.037	0
A330070K13Rik		0.003	0	0.001	0.002	0.007			0	0	0	0
A330074K22Rik		0	0.018	0.016	0.011	0.018			0.01	0	0.022	0.039
A330087D11Rik		0	0.003	0	0	0			0	0	0.01	0
A330093E20Rik		0.003	0	0.004	0.008	0			0	0	0	0.169
A330094K24Rik		0.005	0	0.001	0	0.011			0	0	0	0
A330102I10Rik		0.128	0.192	0.331	0.476	0.353			0.032	0.368	0.066	0
A3galt2		0.012	0.019	0.033	0.013	0.004			0	0.034	0.032	0.007
A430005L14Rik		0.112	0.148	0.115	0.092	0.115			0.213	0.29	0.206	0.203
A430010J10Rik		0.008	0.009	0.008	0.009	0.005			0.007	0	0.007	0
A430018G15Rik		0.046	0.059	0.105	0.068	0.081			0.02	0.02	0.209	0.082
A430027H14Rik		0	0	0.013	0.007	0			0.021	0	0	0
A430033K04Rik		0.088	0.201	0.11	0.158	0.101			0.103	0.063	0.056	0.292
A430034D21Rik		0.004	0.002	0.004	0.007	0.019			0.009	0	0	0
A430035B10Rik		0.091	0.034	0.064	0.046	0.081			0.047	0.009	0	0.011
A430046D13Rik		0.076	0.091	0.077	0.087	0.099			0.22	0.153	0.053	0.04
A430048G15Rik		0.002	0	0	0	0			0	0	0	0
A430057M04Rik		0.017	0.02	0.003	0.01	0.015			0	0.024	0.008	0
A430072P03Rik		0.003	0.002	0.002	0	0			0	0	0	0
A430073D23Rik		0.258	0.347	0.299	0.276	0.361			0.44	0.212	0.339	0.172
A430078I02Rik		0.004	0.014	0.004	0.011	0.016			0	0	0.008	0
A430089I19Rik		0	0	0	0	0			0	0	0	0
A430093F15Rik		0.006	0.018	0.016	0.006	0.005			0.016	0	0.017	0.021
A430105I19Rik		0.002	0.004	0.006	0.011	0.039			0.06	0	0.008	0
A430105J06Rik		0.008	0	0.004	0.005	0			0	0	0.014	0
A430108G06Rik		0.002	0	0.011	0.034	0			0.033	0	0	0.018
A4galt		0.003	0	0	0.004	0			0.004	0	0	0
A4gnt		0.002	0.008	0.004	0.002	0			0	0	0	0
A530006G24Rik		0	0.012	0	0.003	0			0.006	0	0	0
A530010F05Rik		0	0	0	0	0.007			0	0	0	0
A530013C23Rik		0.003	0.009	0.024	0.012	0.018			0.021	0	0.049	0
A530016L24Rik		0	0.004	0.004	0.005	0			0	0	0	0
A530020G20Rik		0.007	0.019	0	0.026	0.019			0.013	0	0	0
A530032D15Rik		0.002	0	0.001	0	0			0	0	0.005	0
A530040E14Rik		0.006	0	0	0	0			0	0	0	0
A530053G22Rik		0.009	0	0.003	0.004	0.05			0.012	0	0	0.011
A530053M12Rik		0.005	0	0	0	0			0	0	0	0
A530058N18Rik		0.012	0.015	0.012	0.012	0.098			0.239	0.188	0.19	0.013
A530064D06Rik		0	0.008	0	0.004	0			0.005	0	0	0.013
A530072M11Rik		0.008	0.01	0.013	0.008	0			0	0.018	0.037	0.031
A530076I17Rik		0.006	0.026	0.035	0.04	0.029			0.008	0	0.008	0.017
A530083I20Rik		0.005	0.023	0.02	0.017	0			0.017	0	0.014	0
A530084C06Rik		0.004	0	0.005	0.003	0.013			0.009	0	0	0
A530095I07Rik		0.005	0.003	0.01	0.005	0			0	0	0	0
A530099J19Rik		0.002	0.007	0.01	0.01	0			0	0	0	0
A630001G21Rik		0.007	0.008	0.004	0.011	0.006			0.005	0	0.015	0.013
A630010A05Rik		0	0	0.002	0	0			0	0	0	0
A630012P03Rik		0.008	0	0.009	0.003	0			0.01	0	0	0
A630014C17Rik		0.093	0.04	0.029	0.011	0.026			0.025	0.016	0.046	0.021
A630023A22Rik		0.005	0	0	0	0			0	0	0	0
A630023P12Rik		0	0	0	0	0			0	0	0	0
A630031M04Rik		0.002	0.011	0.007	0.004	0.017			0	0.019	0	0
A630033H20Rik		0.023	0.024	0.016	0.008	0.02			0.028	0	0.021	0.122
A630035G10Rik		0.002	0.004	0.004	0.006	0.057			0	0	0.011	0
A630050E04Rik		0	0	0	0	0			0	0	0	0
A630052C17Rik		0.018	0.035	0.026	0.045	0.078			0.03	0	0.015	0.01
A630072L19Rik		0.005	0	0.003	0.02	0.005			0	0	0.014	0
A630073D07Rik		0.004	0.008	0.015	0.003	0.004			0.006	0.024	0.014	0.024
A630075F10Rik		0.002	0.005	0.019	0.006	0.005			0	0	0.011	0
A630076J17Rik		0	0	0.003	0.004	0			0	0	0	0
A630091E08Rik		0	0	0	0	0			0	0	0	0
A630095E13Rik		0.003	0.004	0.001	0.003	0			0	0.026	0	0
A630095N17Rik		0.002	0	0	0	0			0	0	0	0
A730004F24Rik		0	0	0.003	0	0			0	0	0	0
A730011C13Rik		0.024	0.04	0.025	0.009	0.043			0.031	0.084	0.011	0.042
A730015C16Rik		0	0.002	0.002	0	0			0	0	0	0
A730017C20Rik		0.345	1.16	2.562	2.35	0.55			3.162	2.364	0.16	0.025
A730017L22Rik		0.021	0.014	0.023	0.048	0.04			0.026	0.088	0.038	0.116
A730018C14Rik		0	0	0	0	0			0	0	0	0
A730020E08Rik		0.361	0.47	0.467	0.3	0.231			0.298	0.275	0.316	0.394
A730020M07Rik		0.037	0.049	0.056	0.022	0.012			0	0	0.032	0
A730032A03Rik		0	0.006	0	0.002	0			0.019	0	0.008	0
A730035I17Rik		0	0	0	0	0.006			0	0	0	0
A730036I17Rik		0.018	0.04	0.021	0.016	0			0.019	0	0	0.021
A730045E13Rik		0	0	0.004	0	0			0	0	0	0
A730046J19Rik		0.012	0.005	0.001	0.007	0.008			0	0	0	0.112
A730049H05Rik		0.003	0	0.004	0.011	0.006			0	0.023	0	0.008
A730056A06Rik		0.135	0.059	0.03	0.039	0.15			0.093	0.035	0.048	0
A730060N03Rik		0.005	0.009	0.001	0	0			0.036	0	0.014	0
A730061H03Rik		0	0	0	0	0			0	0	0	0
A730071L15Rik		0.046	0.025	0.016	0.002	0			0.026	0	0	0.011
A730081D07Rik		0.042	0.034	0.029	0.004	0.041			0.085	0.022	0.026	0.035
A730082K24Rik		0.08	0.062	0.114	0.064	0.081			0.144	0.127	0.034	0.041
A730085K08Rik		0.002	0.003	0.002	0.008	0			0	0	0	0
A730090N16Rik		0.002	0	0.008	0	0			0.028	0	0.007	0.014
A730098A19Rik		0.031	0.026	0.011	0.03	0.075			0.064	0.019	0.032	0.033
A830005F24Rik		0.008	0.001	0.006	0.008	0			0.008	0	0.011	0.009
A830008E24Rik		0.036	0.038	0.092	0.117	0.021			0.055	0.026	0.064	0.026
A830009L08Rik		0.01	0.007	0.007	0.009	0.012			0	0	0.016	0.01
A830010M20Rik		2.18	2.284	1.415	0.453	0.451			0.703	0.285	0.535	0.523
A830011K09Rik		0.064	0.032	0.016	0.002	0.02			0.008	0	0.044	0.013
A830012C17Rik		0.007	0.003	0.002	0.002	0			0	0	0	0
A830018L16Rik		0.086	0.101	0.04	0.112	0.09			0.326	0.304	0.06	0.166
A830019L24Rik		0	0.002	0.004	0	0.006			0	0	0.006	0
A830019P07Rik		0.007	0.016	0.005	0.013	0.024			0.02	0.038	0	0.013
A830029E22Rik		0	0.02	0.005	0.003	0			0	0	0.011	0.007
A830031A19Rik		0	0.002	0	0	0			0	0	0	0
A830035A12Rik		0.004	0	0.001	0	0			0	0	0	0
A830036E02Rik		0.005	0.021	0.021	0.011	0			0.017	0.126	0.036	0.026
A830052D11Rik		0.008	0.018	0.016	0.007	0.013			0	0	0	0.012
A830080D01Rik		0.254	0.247	0.169	0.225	0.073			0.246	0.042	0.172	0.174
A830082K12Rik		0.039	0.075	0.065	0.026	0.022			0.121	0.045	0.054	0.019
A930001A20Rik		0	0	0	0.004	0			0	0	0	0
A930001C03Rik		0	0	0	0	0			0	0	0	0
A930002H24Rik		0	0.002	0	0	0			0	0	0	0
A930002I21Rik		0.015	0	0.001	0	0			0	0	0	0
A930003A15Rik		0.005	0	0.005	0.012	0.381			0	0	0	0
A930003O13Rik		0.031	0.012	0.02	0.022	0.022			0	0.073	0.006	0.028
A930004D18Rik		0.04	0	0.023	0.005	0.046			0.044	0	0.014	0.029
A930005H10Rik		0.168	0.146	0.135	0.115	0.099			0.119	0.277	0.129	0.026
A930006I01Rik		0.002	0.002	0.005	0	0			0	0	0	0.017
A930006K02Rik		0.014	0	0.046	0.035	0			0.023	0	0.014	0.024
A930006L05Rik		0.004	0.002	0	0.007	0.02			0	0	0	0
A930007I19Rik		0.025	0.014	0.038	0.028	0			0.012	0	0	0
A930009A15Rik		0	0	0.007	0	0			0	0	0.009	0
A930011G23Rik		0.089	0.069	0.075	0.124	0.101			0.078	0.047	0.112	0.2
A930012L18Rik		0.019	0.027	0.039	0.006	0.024			0.006	0.067	0.033	0
A930012O16Rik		0.015	0.021	0.015	0.012	0			0.026	0	0	0.135
A930014E10Rik		0	0.002	0.016	0.001	0			0	0	0	0
A930015D03Rik		0.013	0.009	0.014	0.017	0			0	0	0	0.024
A930016O22Rik		0.011	0.002	0.012	0.002	0.008			0.007	0	0.03	0
A930017K11Rik		0.022	0.037	0.003	0.017	0.012			0	0	0	0
A930018M24Rik		0.002	0	0.001	0.001	0			0	0	0	0
A930018P22Rik		0	0.003	0.001	0.002	0			0	0	0	0
A930019D19Rik		0.002	0	0	0.002	0			0	0	0	0
A930024E05Rik		0.268	0.104	0.038	0.096	0.073			0.023	0	0.026	0.085
A930024N18Rik		0	0.002	0.007	0	0			0	0	0	0.04
A930029G22Rik		0.036	0.027	0.009	0.009	0.008			0.013	0	0	0.011
A930031H19Rik		0	0	0	0	0			0	0	0	0
A930033H14Rik		0.01	0.033	0.017	0.032	0.023			0.029	0.016	0.03	0
A930038B10Rik		0.003	0.004	0.013	0.015	0			0	0	0	0
A930041C12Rik		0	0	0	0.003	0.014			0	0	0	0
A930104D05Rik		0	0	0	0.001	0			0.007	0	0.013	0
AA415398		0.035	0.095	0.087	0.007	0.034			0.116	0.043	0.108	0.037
AA465934		0.071	0.045	0.025	0.06	0.045			0.148	0.068	0.073	0.05
AA467197		0.07	0.086	0.055	0.021	0.007			0	0	0	0
AA543186		0.006	0.014	0.014	0.01	0.007			0.007	0	0.02	0
AA545190		0.002	0.007	0.001	0	0			0	0	0	0
AA645442		0.026	0.015	0.038	0.018	0.02			0	0	0	0
AA672651		0.004	0	0.005	0.01	0.005			0	0	0	0
AA792892		0	0	0	0	0			0	0	0	0
AA986860		0.021	0.015	0.006	0.05	0.013			0.052	0	0.007	0
AB041806		0.105	0.193	0.146	0.157	0.054			0.135	0.096	0.141	0.171
AB124611		0	0.014	0.009	0.002	0			0	0	0	0
AC087559.2		0	0.002	0.003	0.002	0			0.006	0	0.022	0
AC087559.3		0	0	0	0	0			0	0	0	0
AC102264.1		0	0	0	0	0			0	0	0	0
AC123873.2		0	0	0	0	0			0	0	0	0
AC123873.3		0	0	0	0	0			0	0	0	0
AC124606.1		0	0	0	0	0			0	0	0	0
AC124606.2		0	0	0	0	0			0	0	0	0
AC125149.3		0	0	0	0	0			0	0	0	0
AC125178.1		0	0	0	0	0			0	0	0	0
AC132444.1		0	0.003	0.056	0.065	0.02			0.017	0.022	0.152	0.011
AC132444.2		0	0	0	0	0			0	0	0	0
AC132444.4		0	0	0	0	0			0	0	0	0
AC132444.6		0.032	0.053	0.081	0.053	0.055			0.109	0.042	0.072	0.073
AC133095.2		0	0	0	0	0			0	0	0	0
AC133103.1		0	0	0	0	0			0	0	0	0
AC133103.5		0	0	0.001	0	0			0	0	0	0
AC133103.6		0	0	0	0	0			0	0	0	0
AC133103.7		0	0	0	0	0			0	0	0	0
AC140325.2		0	0	0	0	0			0	0	0	0
AC140325.4		0	0	0	0	0			0	0	0	0
AC149090.1		0.707	0.493	0.567	0.724	0.683			1.903	2.138	0.765	0.422
AC163611.2		0	0	0	0	0			0	0	0	0
AC164084.1		0	0.004	0.002	0.003	0			0.013	0.027	0	0.026
AC164084.2		0	0	0	0	0			0	0	0	0
AC165294.2		0	0	0	0	0			0	0	0	0
AC165294.3		0	0	0	0	0			0	0	0	0
AC168977.1		0.024	0.059	0.096	0.171	0.012			0.025	0.016	0	0.037
AC234645.1		0	0	0	0	0			0	0	0	0
AF067061		0	0	0	0.001	0			0	0	0	0
AF067063		0	0	0	0	0			0	0	0.029	0
AF366264		0	0.011	0.004	0.012	0.004			0.007	0	0	0.007
AF529169		2.312	2.525	1.853	0.875	0.887			0.224	0.082	0.092	0.06
AI115009		0.002	0	0.002	0.017	0			0	0.062	0	0
AI182371		0.005	0.015	0	0.003	0			0.011	0	0.014	0
AI314180		0.692	0.672	0.774	0.859	0.805			0.909	1.017	0.95	0.655
AI413582		0.669	0.611	0.407	0.543	0.68			0.629	0.477	0.513	0.58
AI427809		0.004	0	0	0	0			0.008	0	0	0
AI429214		0.016	0.008	0.008	0.012	0			0	0	0.048	0.041
AI464131		0.023	0.026	0.035	0.011	0			0	0	0	0.017
AI467606		0.007	0.011	0.012	0.015	0			0.031	0	0	0
AI480526		0.169	0.183	0.208	0.223	0.227			0.152	0	0.076	0.162
AI481877		0.001	0.014	0	0	0			0	0	0.004	0
AI504432		0.085	0.408	0.895	0.488	0.256			0.962	1.294	0.61	0.06
AI506816		1.326	1.345	1.56	1.237	1.725			0.818	1.324	0.842	1.265
AI507597		0	0	0.002	0.005	0.007			0	0	0	0
AI593442		0.162	0.057	0.046	0.074	0.046			2.139	2.183	0.697	0.083
AI597479		0.362	0.367	0.417	0.422	0.503			0.354	0.651	0.487	0.399
AI606181		0.057	0.117	0.054	0.067	0.201			0.049	0	0.1	0.074
AI606473		0	0.002	0.002	0.003	0			0.027	0	0	0
AI607873		0.002	0.007	0.002	0	0			0	0	0	0
AI646519		0.003	0	0	0	0			0.012	0	0	0
AI661453		0.013	0.017	0.006	0	0			0	0.034	0	0
AI662270		0	0	0	0	0			0	0	0	0
AI837181		1.016	0.881	0.579	0.696	0.844			0.737	0.45	0.746	0.809
AI838599		0.024	0.074	0.027	0.05	0.101			0.045	0.042	0.039	0.033
AI839979		0.029	0.067	0.07	0.017	0.028			0.02	0.013	0.039	0.014
AI846148		0.271	0.295	0.438	0.336	0.254			0.426	0.34	0.307	0.365
AI847159		0.005	0.003	0.006	0	0.007			0.014	0	0.009	0
AI854703		0.017	0.014	0.051	0.04	0.032			0.071	0.196	0.073	0.052
AI987944		0.27	0.239	0.17	0.39	0.214			0.183	0.274	0.328	0.341
AK010878		0.63	0.658	0.657	0.548	0.669			0.94	0.577	0.64	0.693
AK157302		0	0	0	0	0			0	0	0	0
AU015836		0	0	0.015	0	0			0	0	0.006	0
AU016765		0	0	0	0.004	0			0	0	0	0
AU018091		0	0.005	0	0.002	0.005			0.016	0	0	0.017
AU019823		0.208	0.254	0.225	0.296	0.229			0.192	0.285	0.175	0.183
AU019990		0	0.004	0.005	0.005	0			0	0	0	0
AU020206		0	0	0	0	0			0	0.009	0	0.008
AU021092		0	0.014	0.014	0.005	0			0	0	0	0
AU022252		1.126	1.308	1.257	1.348	1.333			1.595	2.217	1.539	1.524
AU022751		0.002	0.009	0.041	0.008	0.01			0.028	0	0	0
AU022754		0.002	0	0.004	0.005	0			0	0.02	0.015	0
AU023070		0	0	0.002	0	0			0	0	0	0
AU040320		1.026	0.778	0.811	0.811	0.726			0.663	0.71	0.631	0.881
AU041133		0.024	0.093	0.028	0.024	0.063			0.05	0.024	0.061	0.024
AV026068		0.006	0.018	0.014	0.04	0			0.014	0	0.006	0.01
AV039307		0.011	0.011	0.016	0.005	0.005			0.008	0	0	0
AV064505		0	0.005	0	0	0			0	0	0	0
AV099323		0	0.002	0	0.005	0.007			0	0	0.008	0
AV320801		0	0	0	0	0			0	0	0	0
AW011738		0.019	0.011	0.015	0.026	0.017			0.01	0.013	0	0
AW047730		0.008	0.008	0.012	0.005	0			0.009	0	0	0
AW112010		0	0	0.003	0.012	0			0	0	0	0
AW121686		0.002	0.003	0.007	0.008	0.005			0	0	0	0
AW146154		0.098	0.071	0.102	0.104	0.098			0.121	0.07	0.148	0.135
AW209491		0.226	0.292	0.138	0.296	0.423			0.268	0.421	0.291	0.204
AW495222		0.006	0.002	0.002	0.031	0.006			0.028	0	0	0
AW549877		1.049	0.796	0.893	0.753	1.018			0.634	0.583	0.589	0.907
AW551984		0.027	0.055	0.106	0.634	0.528			2.487	2.133	1.809	0.816
AW554918		0.006	0.016	0.006	0.003	0			0.004	0	0	0
AW822073		0	0	0	0	0			0	0	0	0
AW822252		0.03	0.017	0.036	0.064	0.042			0.057	0.015	0.068	0
AY074887		0.056	0.077	0.113	0.148	0.151			0.092	0.118	0.257	0.2
AY358078		0.003	0.006	0.004	0.006	0			0	0	0	0
AY512915		0.005	0.004	0.013	0.005	0			0.021	0	0.067	0
AY512931		0.003	0.01	0.005	0.012	0.006			0	0	0.015	0
AY702103		0.019	0.002	0.009	0.011	0			0.023	0	0.013	0
AY761184		0	0	0	0	0			0	0	0	0
AY761185		0	0	0	0	0			0	0	0	0
Aaas		0.101	0.085	0.074	0.056	0.117			0.053	0.448	0.108	0.226
Aacs		0.214	0.26	0.377	0.381	0.292			0.427	0.312	0.441	0.241
Aadac		0	0	0.019	0	0			0.011	0	0.013	0.01
Aadacl2		0.002	0	0	0	0			0	0	0	0
Aadat		0.002	0.002	0.003	0.005	0.01			0.026	0.022	0.007	0
Aaed1		0.003	0.01	0	0.001	0			0	0	0	0
Aagab		1.001	0.805	0.777	0.964	0.748			0.587	0.959	0.55	0.997
Aak1		1.779	1.459	1.029	1.25	1.3			2.065	1.544	1.329	1.264
Aamdc		0.52	0.808	0.604	0.452	0.488			0.462	0.403	0.915	0.741
Aamp		1.994	2.074	1.732	1.876	2.248			1.991	1.407	2.418	2.159
Aanat		0.004	0.007	0.007	0.01	0			0	0	0	0.008
Aar2		0.191	0.193	0.208	0.144	0.157			0.245	0.136	0.155	0.239
Aard		0.03	0.004	0.066	0.112	0.202			0.199	0.302	0.03	0.055
Aars		3.106	2.237	1.57	1.527	1.918			2.063	1.922	1.846	2.193
Aars2		0.189	0.17	0.132	0.259	0.18			0.248	0.359	0.174	0.137
Aarsd1		0.489	0.533	0.595	0.545	0.484			0.384	0.282	0.54	0.363
Aasdh		0.055	0.032	0.059	0.048	0.016			0.049	0.049	0.06	0.057
Aasdhppt		0.502	0.566	0.428	0.387	0.492			0.542	0.383	0.49	0.671
Aass		0.037	0	0.001	0.021	0.01			0	0	0.007	0
Aatf		0.101	0.135	0.13	0.209	0.158			0.362	0.11	0.096	0.142
Aatk		1.114	0.804	0.546	0.941	1.363			1.389	1.514	1.334	1.104
Abat		1.404	1.078	1.162	1.499	1.788			2.333	3.003	2.463	2.014
Abca1		0.059	0.082	0.116	0.04	0.053			0.119	0.036	0.031	0.052
Abca12		0.038	0.059	0.08	0.065	0.029			0.135	0.035	0.063	0.102
Abca13		0.006	0	0.003	0.001	0			0.009	0	0.005	0
Abca14		0.006	0.003	0.002	0.009	0			0	0	0	0.015
Abca15		0.002	0.003	0.01	0.002	0.073			0	0.01	0	0
Abca16		0.005	0.005	0	0.006	0			0.004	0	0	0
Abca17		0.005	0.002	0.007	0.008	0.039			0.017	0	0.009	0.021
Abca2		0.646	0.786	0.674	0.812	0.936			1.107	0.9	0.76	0.792
Abca3		0.45	0.406	0.501	0.341	0.299			0.614	0.433	0.569	0.189
Abca4		0.017	0.02	0.014	0.01	0.009			0.006	0.009	0.015	0
Abca5		0.375	0.236	0.236	0.358	0.303			0.622	0.94	0.445	0.42
Abca6		0.005	0.008	0.013	0.003	0.012			0.032	0	0.008	0
Abca7		0.07	0.103	0.083	0.078	0.141			0.066	0.022	0.14	0.081
Abca8a		0	0.005	0	0.002	0			0	0	0	0
Abca8b		0.19	0.191	0.134	0.315	0.208			0.329	0.221	0.125	0.315
Abca9		0.005	0.007	0.001	0	0.024			0	0	0.005	0
Abcb10		0.264	0.115	0.25	0.223	0.222			0.549	0.433	0.317	0.285
Abcb11		0.001	0.003	0.005	0.004	0			0.007	0	0.007	0
Abcb1a		0.012	0.031	0.018	0.02	0.027			0	0	0.007	0.01
Abcb1b		0.024	0.028	0.048	0.079	0.011			0.053	0.067	0.035	0.014
Abcb4		0.321	0.408	0.335	0.538	0.589			0.455	0.777	0.292	0.476
Abcb5		0.007	0.003	0.001	0.013	0			0	0	0.018	0.033
Abcb6		0.111	0.093	0.07	0.04	0.103			0.109	0.222	0.093	0.088
Abcb7		0.502	0.63	0.514	0.406	0.359			0.421	0.823	0.562	0.408
Abcb8		0.325	0.365	0.384	0.47	0.591			0.43	0.534	0.717	0.534
Abcb9		0.376	0.246	0.127	0.229	0.258			0.297	0.256	0.311	0.219
Abcc1		0.105	0.147	0.211	0.133	0.155			0.177	0.206	0.113	0.02
Abcc10		0.078	0.084	0.061	0.085	0.072			0.126	0.048	0.081	0.144
Abcc12		0.024	0.044	0.043	0.018	0.018			0	0.026	0.016	0.015
Abcc2		0.002	0.007	0.006	0.004	0.005			0.023	0	0.006	0
Abcc3		0	0.006	0.004	0.004	0			0	0	0	0
Abcc4		0.03	0.031	0.038	0.032	0.018			0.005	0.034	0.022	0.014
Abcc5		0.624	0.74	0.873	0.859	0.777			1.561	1.21	0.795	0.781
Abcc6		0.003	0.009	0.002	0.007	0			0	0	0	0
Abcc8		0	0.005	0.099	0.177	0.047			0.144	0.016	0.152	0.063
Abcc9		0.01	0.015	0.026	0.007	0			0.098	0	0.033	0.036
Abcd1		0.175	0.133	0.136	0.137	0.26			0.041	0.192	0.132	0.104
Abcd2		0.628	0.536	0.413	0.662	0.542			0.789	0.433	0.652	0.399
Abcd3		0.691	0.875	0.645	0.593	0.422			0.462	0.281	0.528	0.729
Abcd4		0.313	0.249	0.238	0.209	0.229			0.32	0.105	0.325	0.323
Abce1		1.619	1.563	1.35	1.284	1.045			0.78	0.348	0.911	1.314
Abcf1		0.55	0.302	0.308	0.455	0.523			0.56	0.238	0.565	0.261
Abcf2		1.298	0.951	0.833	0.916	0.963			0.816	0.808	1.057	0.957
Abcf3		0.612	0.545	0.507	0.622	0.482			0.489	0.532	0.476	0.694
Abcg1		0.377	0.391	0.231	0.172	0.165			0.411	0.123	0.224	0.262
Abcg2		0.015	0.029	0.036	0.034	0.105			0.13	0.129	0.014	0.014
Abcg3		0.008	0.003	0.013	0.004	0			0.013	0	0	0
Abcg4		0.912	0.643	0.487	0.655	1.123			0.63	1.162	0.53	0.383
Abcg5		0.003	0.002	0.002	0	0			0.009	0	0	0
Abcg8		0.003	0.005	0.013	0	0			0.013	0	0.01	0
Abhd1		0.067	0.043	0.054	0.07	0.044			0.044	0	0.012	0.041
Abhd10		0.544	0.498	0.556	0.586	0.533			0.331	0.455	0.907	0.744
Abhd11		0.208	0.182	0.2	0.289	0.442			0.206	0.407	0.251	0.361
Abhd11os		0.572	0.685	0.658	1.124	1.365			0.399	0.265	0.582	0.819
Abhd12		1.028	0.844	0.78	0.684	0.783			1.607	0.941	0.888	0.969
Abhd12b		0.002	0.003	0	0.063	0			0.073	0	0.007	0.013
Abhd13		0.404	0.381	0.413	0.362	0.469			0.282	0.524	0.507	0.735
Abhd14a		0.101	0.107	0.125	0.154	0.058			0.234	0.019	0.102	0.157
Abhd14b		0.109	0.115	0.138	0.112	0.073			0.049	0.037	0.164	0.356
Abhd15		0.065	0.029	0.05	0.038	0			0	0	0.023	0.021
Abhd16a		1.535	1.066	0.904	0.876	1.376			1.501	0.853	1.051	1.392
Abhd16b		0	0.003	0	0.001	0			0	0	0	0
Abhd17a		0.712	0.636	0.545	0.382	0.496			0.516	0.268	0.536	0.55
Abhd17c		0.066	0.117	0.089	0.264	0.164			0.188	0.059	0.236	0.192
Abhd18		0.221	0.194	0.231	0.302	0.219			0.198	0.445	0.315	0.278
Abhd2		0.183	0.213	0.261	0.366	0.254			0.115	0.058	0.168	0.054
Abhd3		0.583	0.462	0.289	0.417	0.511			0.388	0.465	0.5	0.495
Abhd4		0.08	0.173	0.199	0.199	0.095			0.107	0.043	0.034	0.141
[truncated: 23,290 more rows]
