# Supplementary material for: Anatomical and single-cell transcriptional profiling of the murine habenular complex
Source: eLife. 2020 Feb 11;9:e51271. doi: 10.7554/eLife.51271 (PMC7012610; doi:10.7554/eLife.51271)
Supplement: Supplementary file 5. [file elife-51271-supp5.xlsx]

## Sheet: Table_5_lhb_DEGs_MAST
	p_val	avg_logFC	pct.1	pct.2	p_val_adj	cluster	gene
Gpr151	1.82e-124	-2.74264	0.049	0.939	4.61e-120	5	Gpr151
Nwd2	1.37e-110	-2.22308	0.278	0.953	3.46e-106	5	Nwd2
Cacnb3	6.96e-90	-1.65543	0.399	0.929	1.76e-85	5	Cacnb3
Olfm1	1.93e-87	-1.29964	0.821	0.963	4.88e-83	5	Olfm1
Necab2	9.27e-80	-1.69504	0.205	0.892	2.34e-75	5	Necab2
Gng8	4.63e-79	-1.73352	0.057	0.785	1.17e-74	5	Gng8
Vsnl1	5e-75	1.7134	0.722	0.04	1.27e-70	5	Vsnl1
Lpar1	3.15e-70	-1.67884	0.076	0.758	7.97e-66	5	Lpar1
Nnat	4.46e-70	-1.54506	0.589	0.926	1.13e-65	5	Nnat
Nptx2	1.47e-69	-1.61883	0.091	0.764	3.71e-65	5	Nptx2
Cartpt	2.04e-68	-2.08465	0.019	0.663	5.15e-64	5	Cartpt
Calm1	4.36e-62	0.922391	0.954	0.848	1.1e-57	5	Calm1
Stmn1	6.33e-58	1.3294	0.924	0.488	1.6e-53	5	Stmn1
Slc24a3	1.05e-56	1.57024	0.73	0.114	2.65e-52	5	Slc24a3
Zic4	1.38e-56	-1.34103	0.373	0.879	3.48e-52	5	Zic4
Zic1	1.54e-54	-0.934059	0.749	0.976	3.89e-50	5	Zic1
Pou4f1	1.88e-52	-1.25956	0.243	0.828	4.76e-48	5	Pou4f1
Rbfox1	3.84e-49	1.38336	0.525	0.02	9.7e-45	5	Rbfox1
Nek7	6.2e-49	-1.34956	0.259	0.791	1.57e-44	5	Nek7
Msi2	1.19e-48	-1.01732	0.529	0.906	3.01e-44	5	Msi2
Fstl1	2.25e-48	-1.56102	0.163	0.697	5.69e-44	5	Fstl1
Sncg	2.99e-48	-1.46455	0.19	0.747	7.57e-44	5	Sncg
Gabra1	5.33e-48	1.45834	0.646	0.094	1.35e-43	5	Gabra1
Nsf	2.93e-46	0.913822	0.92	0.731	7.42e-42	5	Nsf
Syn2	4.96e-46	1.32628	0.757	0.205	1.25e-41	5	Syn2
Kcnmb4	6.19e-46	-1.35376	0.133	0.677	1.57e-41	5	Kcnmb4
Sez6l	6.95e-46	0.993342	0.521	0.024	1.76e-41	5	Sez6l
Vav3	2.21e-45	-1.26068	0.152	0.69	5.59e-41	5	Vav3
Pde2a	9.62e-45	-1.56167	0.156	0.653	2.43e-40	5	Pde2a
Syt9	1.21e-44	-1.44757	0.171	0.68	3.06e-40	5	Syt9
Kcnc1	2.24e-43	1.11519	0.498	0.024	5.66e-39	5	Kcnc1
Htr2c	3.65e-43	-1.20628	0.297	0.825	9.24e-39	5	Htr2c
Igfbp5	2.66e-41	1.13624	0.54	0.047	6.71e-37	5	Igfbp5
Sst	1.43e-40	-2.73796	0.087	0.559	3.62e-36	5	Sst
Cacna2d1	6.24e-40	1.25764	0.494	0.037	1.58e-35	5	Cacna2d1
Snap25	9.29e-40	0.853564	0.935	0.869	2.35e-35	5	Snap25
Tcf7l2	1.07e-39	-0.688433	0.479	0.949	2.71e-35	5	Tcf7l2
A730017C20Rik	2.53e-39	1.24551	0.49	0.034	6.4e-35	5	A730017C20Rik
Trp53i11	1.26e-38	-1.13433	0.373	0.788	3.18e-34	5	Trp53i11
Ubl3	3.96e-38	-1.07488	0.586	0.865	1e-33	5	Ubl3
Tmem176b	4.52e-38	-1.02444	0.099	0.603	1.14e-33	5	Tmem176b
Syt7	2.29e-37	1.1697	0.529	0.064	5.79e-33	5	Syt7
Ppp3ca	3.18e-37	1.5987	0.749	0.354	8.04e-33	5	Ppp3ca
Gabbr1	4.92e-37	-0.687557	0.894	0.973	1.25e-32	5	Gabbr1
Amigo2	3.96e-36	-1.20275	0.186	0.66	1e-31	5	Amigo2
Gria2	4.61e-36	0.9411	0.863	0.603	1.17e-31	5	Gria2
Lhx9	5.29e-36	-1.1193	0.27	0.714	1.34e-31	5	Lhx9
Npr1	1.05e-35	-0.998558	0.008	0.401	2.65e-31	5	Npr1
Nr4a3	7.71e-35	-1.10099	0.053	0.485	1.95e-30	5	Nr4a3
Rasgrf2	1.01e-34	0.970614	0.437	0.027	2.55e-30	5	Rasgrf2
Calb2	2.54e-33	1.26407	0.783	0.357	6.42e-29	5	Calb2
Sema3d	1.13e-32	-1.06686	0.038	0.455	2.87e-28	5	Sema3d
Nrn1	1.35e-32	-0.777576	0.692	0.919	3.42e-28	5	Nrn1
Rph3a	1.05e-31	0.925158	0.407	0.027	2.65e-27	5	Rph3a
Kctd8	1.46e-31	-1.08994	0.106	0.542	3.7e-27	5	Kctd8
Gnao1	4.82e-31	-0.597392	0.863	0.956	1.22e-26	5	Gnao1
Slc6a1	4.03e-30	0.920404	0.422	0.037	1.02e-25	5	Slc6a1
Gpr139	4.86e-30	-0.961303	0.095	0.522	1.23e-25	5	Gpr139
Chl1	3.16e-29	1.03025	0.662	0.219	8e-25	5	Chl1
Arpp21	5.06e-29	0.808145	0.38	0.027	1.28e-24	5	Arpp21
Nap1l5	8.36e-29	0.832636	0.928	0.764	2.11e-24	5	Nap1l5
Cbln2	8.38e-29	-0.814563	0.559	0.855	2.12e-24	5	Cbln2
Nefl	9.98e-29	0.926966	0.711	0.333	2.52e-24	5	Nefl
Rab3c	1.12e-28	1.0822	0.719	0.32	2.83e-24	5	Rab3c
Efhd2	1.28e-28	1.04493	0.593	0.168	3.24e-24	5	Efhd2
Hpca	1.43e-28	1.21495	0.582	0.152	3.62e-24	5	Hpca
Nrgn	3.99e-28	1.86418	0.49	0.104	1.01e-23	5	Nrgn
Ntm	5.37e-28	0.964031	0.593	0.165	1.36e-23	5	Ntm
Ankrd34b	7.81e-28	0.833567	0.392	0.034	1.98e-23	5	Ankrd34b
Ncald	1.09e-27	-0.697015	0.688	0.892	2.75e-23	5	Ncald
Sv2b	1.69e-27	-0.886288	0.3	0.714	4.28e-23	5	Sv2b
Ptn	3.75e-27	1.18148	0.471	0.098	9.48e-23	5	Ptn
Cacna1a	5.43e-27	0.75056	0.422	0.051	1.37e-22	5	Cacna1a
Tmsb4x	9.03e-27	0.7724	0.939	0.811	2.28e-22	5	Tmsb4x
Slc2a13	1.04e-26	-0.926	0.354	0.727	2.64e-22	5	Slc2a13
Akain1	3.23e-26	-0.855887	0.084	0.468	8.18e-22	5	Akain1
Fut9	5.96e-26	0.689631	0.331	0.017	1.51e-21	5	Fut9
X2900011O08Rik	6.75e-26	0.884227	0.662	0.276	1.71e-21	5	X2900011O08Rik
Sstr2	7.37e-26	-0.779723	0.027	0.364	1.86e-21	5	Sstr2
Adcy1	1.85e-25	1.04045	0.304	0.01	4.68e-21	5	Adcy1
Plxna4	3.91e-25	0.895146	0.513	0.121	9.89e-21	5	Plxna4
Syt6	5.03e-25	-0.862481	0.167	0.576	1.27e-20	5	Syt6
Nova1	6.4e-25	0.751379	0.411	0.054	1.62e-20	5	Nova1
Tcf4	7.01e-25	1.12775	0.525	0.236	1.77e-20	5	Tcf4
Slc12a5	2.59e-24	0.661822	0.897	0.771	6.54e-20	5	Slc12a5
Apba1	2.68e-24	-0.750059	0.312	0.71	6.78e-20	5	Apba1
Cd83	3.11e-24	0.857325	0.411	0.061	7.87e-20	5	Cd83
Cadps2	3.38e-24	-1.04626	0.163	0.542	8.55e-20	5	Cadps2
Clmp	3.49e-24	0.71013	0.35	0.03	8.82e-20	5	Clmp
Shisa9	5.56e-24	0.713824	0.342	0.03	1.41e-19	5	Shisa9
Cx3cl1	8.45e-24	0.782026	0.783	0.475	2.14e-19	5	Cx3cl1
Rian	3.05e-23	0.642892	0.935	0.869	7.71e-19	5	Rian
Kcnd3	4.48e-23	-0.846981	0.278	0.657	1.13e-18	5	Kcnd3
Nhlh2	4.79e-23	-0.829231	0.335	0.704	1.21e-18	5	Nhlh2
Pde1a	6.57e-23	-0.882363	0.144	0.525	1.66e-18	5	Pde1a
Ap1s2	6.83e-23	0.881144	0.49	0.131	1.73e-18	5	Ap1s2
Vgf	6.86e-23	1.10307	0.331	0.037	1.73e-18	5	Vgf
Fgfr1	1.21e-22	0.691842	0.327	0.027	3.05e-18	5	Fgfr1
Edil3	1.31e-22	0.882607	0.51	0.135	3.31e-18	5	Edil3
Pak1	1.7e-22	0.889333	0.711	0.404	4.29e-18	5	Pak1
Sytl2	1.83e-22	-0.770506	0.266	0.636	4.62e-18	5	Sytl2
Sparcl1	2.53e-22	0.778307	0.643	0.263	6.39e-18	5	Sparcl1
Cytip	4.56e-22	-0.74821	0.019	0.306	1.15e-17	5	Cytip
Camkv	6.03e-22	0.77141	0.475	0.114	1.52e-17	5	Camkv
Elfn1	6.33e-22	-0.700013	0.099	0.465	1.6e-17	5	Elfn1
Nptn	1.33e-21	0.709373	0.738	0.562	3.36e-17	5	Nptn
Gm10421	1.87e-21	-0.649777	0.038	0.337	4.72e-17	5	Gm10421
Kiss1r	2.51e-21	-0.506319	0.004	0.249	6.36e-17	5	Kiss1r
Epha5	3.95e-21	0.851905	0.65	0.333	1e-16	5	Epha5
Fabp5	5.13e-21	0.750581	0.597	0.212	1.3e-16	5	Fabp5
Pcdh10	7.51e-21	0.81528	0.616	0.226	1.9e-16	5	Pcdh10
Tpd52l1	1.71e-20	0.808305	0.471	0.135	4.32e-16	5	Tpd52l1
Atp2b2	2.8e-20	0.708564	0.635	0.263	7.08e-16	5	Atp2b2
Dnajc6	4.12e-20	0.744064	0.662	0.333	1.04e-15	5	Dnajc6
Kcng4	4.65e-20	-0.789739	0.011	0.259	1.18e-15	5	Kcng4
Timp2	5.02e-20	0.63658	0.848	0.778	1.27e-15	5	Timp2
Rab27b	5.38e-20	-1.06039	0.285	0.549	1.36e-15	5	Rab27b
Nrsn1	5.94e-20	-0.697801	0.582	0.838	1.5e-15	5	Nrsn1
Grin3a	6.79e-20	-0.690005	0.243	0.63	1.72e-15	5	Grin3a
Zfhx3	8.74e-20	0.837727	0.578	0.209	2.21e-15	5	Zfhx3
Peg3	9.1e-20	0.62944	0.871	0.781	2.3e-15	5	Peg3
Tspan13	9.76e-20	-0.753849	0.597	0.805	2.47e-15	5	Tspan13
Htr5b	1.54e-19	-0.588795	0.004	0.229	3.9e-15	5	Htr5b
Cbln1	1.77e-19	0.856649	0.567	0.424	4.49e-15	5	Cbln1
X1810041L15Rik	2.21e-19	-0.681273	0.586	0.862	5.58e-15	5	X1810041L15Rik
Rmst	4.85e-19	0.590488	0.289	0.027	1.23e-14	5	Rmst
Gap43	5.03e-19	0.699694	0.859	0.663	1.27e-14	5	Gap43
Chgb	5.43e-19	0.705136	0.757	0.468	1.37e-14	5	Chgb
Sez6	5.68e-19	0.817057	0.479	0.165	1.44e-14	5	Sez6
Pitpnc1	8.26e-19	0.564931	0.319	0.04	2.09e-14	5	Pitpnc1
Maoa	1.22e-18	-0.636057	0.513	0.805	3.08e-14	5	Maoa
Adora1	1.53e-18	0.46152	0.236	0.01	3.86e-14	5	Adora1
Grm7	1.79e-18	0.449937	0.255	0.017	4.52e-14	5	Grm7
Sobp	2.65e-18	0.694195	0.449	0.125	6.71e-14	5	Sobp
Ptprd	2.8e-18	0.775056	0.681	0.38	7.08e-14	5	Ptprd
Zic5	2.86e-18	-0.47279	0.084	0.401	7.22e-14	5	Zic5
H3f3b	2.95e-18	-0.583466	0.753	0.899	7.46e-14	5	H3f3b
Mapt	3.44e-18	0.515791	0.901	0.798	8.7e-14	5	Mapt
Chrnb3	3.44e-18	-0.660672	0.027	0.286	8.7e-14	5	Chrnb3
Atp1a1	3.45e-18	-0.660178	0.627	0.832	8.73e-14	5	Atp1a1
Sh3bgrl2	4.89e-18	-0.754037	0.205	0.529	1.24e-13	5	Sh3bgrl2
Pgm2l1	5.25e-18	0.694657	0.643	0.34	1.33e-13	5	Pgm2l1
Dgkg	5.86e-18	0.496291	0.251	0.017	1.48e-13	5	Dgkg
Sirpa	6.05e-18	0.791243	0.437	0.121	1.53e-13	5	Sirpa
Rasgrf1	7.02e-18	0.620967	0.825	0.522	1.77e-13	5	Rasgrf1
Cbln4	7.02e-18	0.830294	0.327	0.051	1.78e-13	5	Cbln4
Ndst4	1e-17	-0.610099	0.057	0.347	2.53e-13	5	Ndst4
Kcna2	1.04e-17	0.782488	0.551	0.246	2.63e-13	5	Kcna2
Maob	1.09e-17	-0.369395	0.027	0.273	2.77e-13	5	Maob
Th	1.17e-17	-0.66239	0.011	0.239	2.95e-13	5	Th
Rgmb	1.67e-17	-0.764041	0.091	0.387	4.22e-13	5	Rgmb
Klhl5	1.88e-17	-0.704743	0.087	0.38	4.75e-13	5	Klhl5
Irx2	2.36e-17	-0.731209	0.373	0.673	5.97e-13	5	Irx2
Lynx1	4.69e-17	0.737318	0.373	0.084	1.19e-12	5	Lynx1
Etv1	5.95e-17	-0.658555	0.065	0.347	1.51e-12	5	Etv1
Rap1gap	6.5e-17	-0.765912	0.479	0.68	1.64e-12	5	Rap1gap
Ifitm10	7e-17	0.505095	0.319	0.051	1.77e-12	5	Ifitm10
Hopx	7.88e-17	-0.69948	0.24	0.572	1.99e-12	5	Hopx
Kif5c	8.59e-17	0.703176	0.627	0.451	2.17e-12	5	Kif5c
Klhdc8b	1.02e-16	-0.70596	0.198	0.519	2.57e-12	5	Klhdc8b
Igsf8	1.06e-16	0.671317	0.707	0.431	2.68e-12	5	Igsf8
Umodl1	1.43e-16	-0.681518	0.008	0.215	3.61e-12	5	Umodl1
Shox2	1.46e-16	0.669328	0.331	0.061	3.69e-12	5	Shox2
Vldlr	1.5e-16	0.685795	0.43	0.125	3.8e-12	5	Vldlr
Kcnmb4os2	2.24e-16	-0.540292	0.019	0.246	5.67e-12	5	Kcnmb4os2
Syt4	3e-16	0.682322	0.776	0.599	7.59e-12	5	Syt4
Chrm3	3.1e-16	0.613101	0.262	0.03	7.83e-12	5	Chrm3
Fndc5	3.16e-16	0.812708	0.487	0.178	7.99e-12	5	Fndc5
AI593442	3.32e-16	0.772856	0.437	0.131	8.4e-12	5	AI593442
Bend6	3.68e-16	0.594254	0.711	0.404	9.3e-12	5	Bend6
Cap2	3.73e-16	0.619687	0.407	0.108	9.44e-12	5	Cap2
Gucy1a3	3.95e-16	-0.739102	0.221	0.529	9.99e-12	5	Gucy1a3
Plxdc1	4.95e-16	0.48636	0.186	0.003	1.25e-11	5	Plxdc1
Fam19a5	5.02e-16	0.672931	0.49	0.168	1.27e-11	5	Fam19a5
Shroom2	6.63e-16	0.514021	0.293	0.044	1.68e-11	5	Shroom2
C1qtnf4	6.93e-16	0.520061	0.259	0.03	1.75e-11	5	C1qtnf4
Kcnma1	7.8e-16	-0.844755	0.426	0.613	1.97e-11	5	Kcnma1
Tmem176a	8.23e-16	-0.558732	0.049	0.306	2.08e-11	5	Tmem176a
Cadps	8.99e-16	0.650472	0.601	0.279	2.27e-11	5	Cadps
Adarb1	1.18e-15	0.694571	0.46	0.185	2.97e-11	5	Adarb1
Bdnf	1.51e-15	0.562748	0.205	0.01	3.82e-11	5	Bdnf
Nat8l	1.64e-15	0.682984	0.517	0.205	4.15e-11	5	Nat8l
Dpp6	1.78e-15	-0.544633	0.658	0.838	4.51e-11	5	Dpp6
Unc5c	1.95e-15	0.53026	0.209	0.013	4.94e-11	5	Unc5c
Tesc	2.68e-15	-0.692663	0.137	0.441	6.77e-11	5	Tesc
Frrs1l	2.7e-15	0.656797	0.7	0.448	6.84e-11	5	Frrs1l
Penk	2.71e-15	0.905326	0.179	0.003	6.87e-11	5	Penk
Dzank1	3.26e-15	0.630143	0.677	0.444	8.25e-11	5	Dzank1
Ano1	3.26e-15	-0.671664	0.027	0.242	8.25e-11	5	Ano1
Pcbd1	3.28e-15	-0.637081	0.327	0.626	8.29e-11	5	Pcbd1
Syt13	3.52e-15	-0.662187	0.529	0.69	8.9e-11	5	Syt13
Cmip	4.61e-15	0.601526	0.776	0.566	1.17e-10	5	Cmip
Pcp4l1	5.59e-15	0.288317	0.338	0.094	1.41e-10	5	Pcp4l1
Cck	5.97e-15	1.00952	0.209	0.013	1.51e-10	5	Cck
Caln1	6.4e-15	0.475297	0.297	0.051	1.62e-10	5	Caln1
Chst10	7.05e-15	-0.650179	0.395	0.626	1.78e-10	5	Chst10
Camta1	7.58e-15	0.540245	0.852	0.67	1.92e-10	5	Camta1
Chd3os	8.78e-15	0.679251	0.715	0.481	2.22e-10	5	Chd3os
Fam84a	8.97e-15	0.506588	0.259	0.037	2.27e-10	5	Fam84a
Diras2	9.99e-15	0.456603	0.221	0.02	2.53e-10	5	Diras2
Slc7a3	1.25e-14	0.42871	0.171	0.003	3.16e-10	5	Slc7a3
Hs6st2	1.6e-14	-0.676758	0.278	0.562	4.04e-10	5	Hs6st2
Megf11	1.74e-14	0.675011	0.278	0.047	4.39e-10	5	Megf11
Cntn1	1.94e-14	0.579264	0.73	0.589	4.92e-10	5	Cntn1
Ints3	1.97e-14	-0.633808	0.259	0.549	4.99e-10	5	Ints3
Prkd1	2.15e-14	-0.501998	0.042	0.276	5.43e-10	5	Prkd1
Mctp1	2.25e-14	-0.58835	0.049	0.283	5.7e-10	5	Mctp1
Nptx1	2.31e-14	-0.712818	0.137	0.421	5.85e-10	5	Nptx1
Ppp2r2b	2.37e-14	0.735412	0.433	0.158	6e-10	5	Ppp2r2b
Ntng1	2.45e-14	0.598503	0.232	0.027	6.2e-10	5	Ntng1
Ube2ql1	3.92e-14	-0.632992	0.521	0.684	9.9e-10	5	Ube2ql1
Crim1	3.97e-14	0.621835	0.289	0.054	1e-09	5	Crim1
Rbms3	4.09e-14	-0.578066	0.445	0.737	1.04e-09	5	Rbms3
Gabra5	4.38e-14	0.451062	0.179	0.007	1.11e-09	5	Gabra5
Pcdh17	5.51e-14	0.677884	0.426	0.141	1.39e-09	5	Pcdh17
Id4	5.93e-14	-0.814213	0.152	0.428	1.5e-09	5	Id4
Nhs	6.26e-14	0.487112	0.205	0.017	1.58e-09	5	Nhs
Aifm3	6.93e-14	-0.597485	0.175	0.465	1.75e-09	5	Aifm3
Gabrb1	7.58e-14	0.659912	0.479	0.178	1.92e-09	5	Gabrb1
Kcnh1	7.82e-14	0.362064	0.163	0.003	1.98e-09	5	Kcnh1
Gabrg1	8.09e-14	0.561129	0.281	0.051	2.05e-09	5	Gabrg1
Ap3s1	8.74e-14	-0.614979	0.399	0.65	2.21e-09	5	Ap3s1
Gabra2	1.13e-13	0.672449	0.639	0.343	2.86e-09	5	Gabra2
Ncdn	1.25e-13	0.508537	0.875	0.761	3.16e-09	5	Ncdn
Sdc2	1.52e-13	0.622213	0.327	0.077	3.85e-09	5	Sdc2
Gas5	1.62e-13	-0.504266	0.658	0.828	4.11e-09	5	Gas5
Gng4	1.79e-13	0.357888	0.156	0.003	4.54e-09	5	Gng4
Tmem255a	1.88e-13	-0.791972	0.418	0.663	4.74e-09	5	Tmem255a
Sgpp2	1.98e-13	0.39613	0.221	0.024	5e-09	5	Sgpp2
Cntnap2	2.05e-13	-0.583951	0.62	0.808	5.19e-09	5	Cntnap2
Tmem158	2.36e-13	-0.652909	0.16	0.431	5.98e-09	5	Tmem158
Hapln4	2.49e-13	0.410306	0.228	0.027	6.29e-09	5	Hapln4
Nxph4	2.55e-13	-0.610405	0.046	0.273	6.44e-09	5	Nxph4
Mycbp2	2.67e-13	0.614755	0.749	0.542	6.76e-09	5	Mycbp2
Lcorl	2.89e-13	-0.545047	0.103	0.367	7.3e-09	5	Lcorl
Cacng2	3.3e-13	0.565548	0.418	0.138	8.35e-09	5	Cacng2
Cdh3	3.34e-13	-0.459145	0.008	0.178	8.45e-09	5	Cdh3
Basp1	3.58e-13	0.499598	0.905	0.791	9.06e-09	5	Basp1
Fam126b	3.72e-13	0.553594	0.7	0.461	9.42e-09	5	Fam126b
Eif1	4.01e-13	-0.434723	0.837	0.929	1.02e-08	5	Eif1
Fjx1	5.35e-13	0.314426	0.186	0.013	1.35e-08	5	Fjx1
Ar	5.9e-13	0.428689	0.205	0.02	1.49e-08	5	Ar
Dap	5.9e-13	-0.386879	0.019	0.209	1.49e-08	5	Dap
Cacna1i	5.99e-13	0.528254	0.449	0.168	1.52e-08	5	Cacna1i
Rspo3	6.41e-13	-0.675233	0.103	0.34	1.62e-08	5	Rspo3
L1cam	7.01e-13	0.583495	0.532	0.246	1.77e-08	5	L1cam
Sema5a	8.25e-13	0.63029	0.319	0.081	2.09e-08	5	Sema5a
Klhl4	9.15e-13	-0.352736	0.023	0.215	2.31e-08	5	Klhl4
Atp6v1a	9.3e-13	0.436523	0.897	0.828	2.35e-08	5	Atp6v1a
Baiap2	9.86e-13	0.491315	0.194	0.017	2.49e-08	5	Baiap2
Flrt3	1.05e-12	0.584198	0.281	0.061	2.64e-08	5	Flrt3
Gm5741	1.14e-12	-0.397317	0.015	0.195	2.89e-08	5	Gm5741
Pcdh7	1.17e-12	0.412037	0.236	0.034	2.96e-08	5	Pcdh7
Chga	1.23e-12	0.573438	0.544	0.266	3.12e-08	5	Chga
Plpp4	1.32e-12	-0.425756	0.011	0.178	3.33e-08	5	Plpp4
Gnaq	1.37e-12	0.579365	0.551	0.273	3.47e-08	5	Gnaq
Slitrk5	1.4e-12	0.560876	0.3	0.067	3.53e-08	5	Slitrk5
Mab21l1	1.47e-12	-0.52011	0.019	0.202	3.72e-08	5	Mab21l1
Ptma	1.54e-12	-0.511175	0.654	0.852	3.9e-08	5	Ptma
Cetn2	1.74e-12	-0.440624	0.221	0.519	4.4e-08	5	Cetn2
Adcy5	1.78e-12	0.413217	0.255	0.044	4.49e-08	5	Adcy5
Prkcq	1.95e-12	-0.561353	0.08	0.32	4.94e-08	5	Prkcq
Mirg	2.1e-12	0.497154	0.331	0.091	5.3e-08	5	Mirg
Sema6d	2.35e-12	0.394885	0.266	0.051	5.94e-08	5	Sema6d
Elmod1	2.38e-12	0.59762	0.605	0.357	6.03e-08	5	Elmod1
Sox1	3.59e-12	0.553011	0.281	0.064	9.07e-08	5	Sox1
Spock3	3.6e-12	0.439352	0.392	0.128	9.1e-08	5	Spock3
Ldb2	4.08e-12	0.44978	0.221	0.03	1.03e-07	5	Ldb2
Slc39a11	4.49e-12	-0.501968	0.106	0.36	1.14e-07	5	Slc39a11
Disp2	4.59e-12	0.475475	0.802	0.663	1.16e-07	5	Disp2
Scn1b	5.6e-12	0.603365	0.631	0.397	1.42e-07	5	Scn1b
Tppp	6.06e-12	0.598591	0.54	0.273	1.53e-07	5	Tppp
Cd63	6.08e-12	-0.603673	0.167	0.441	1.54e-07	5	Cd63
Gabra3	6.08e-12	0.51605	0.464	0.189	1.54e-07	5	Gabra3
Ckmt1	7.88e-12	0.493725	0.433	0.168	1.99e-07	5	Ckmt1
Rxfp3	8e-12	-0.347802	0.019	0.195	2.02e-07	5	Rxfp3
Fam155a	8.35e-12	0.512128	0.525	0.246	2.11e-07	5	Fam155a
Kcnc4	1e-11	0.526708	0.414	0.152	2.53e-07	5	Kcnc4
Pgm2	1.02e-11	-0.598144	0.3	0.535	2.57e-07	5	Pgm2
Slc7a14	1.17e-11	0.607565	0.407	0.152	2.96e-07	5	Slc7a14
Cntnap5a	1.22e-11	0.658568	0.259	0.057	3.07e-07	5	Cntnap5a
Phlda3	1.26e-11	0.374555	0.19	0.02	3.19e-07	5	Phlda3
Ndufa4	1.27e-11	-0.487196	0.726	0.842	3.21e-07	5	Ndufa4
P2ry1	1.5e-11	0.420773	0.171	0.013	3.78e-07	5	P2ry1
Cacnb4	1.5e-11	0.622555	0.578	0.337	3.79e-07	5	Cacnb4
Jup	1.72e-11	-0.353303	0.049	0.249	4.35e-07	5	Jup
Ryr2	1.75e-11	0.577307	0.316	0.108	4.44e-07	5	Ryr2
Elavl2	1.79e-11	0.686988	0.567	0.34	4.54e-07	5	Elavl2
Plk2	1.82e-11	-0.64057	0.125	0.35	4.61e-07	5	Plk2
Adcy7	1.99e-11	0.389903	0.148	0.007	5.04e-07	5	Adcy7
Camk1d	2.2e-11	0.330956	0.16	0.01	5.55e-07	5	Camk1d
Nr3c1	2.22e-11	0.410918	0.213	0.03	5.62e-07	5	Nr3c1
Tagln2	2.58e-11	-0.467978	0.019	0.182	6.53e-07	5	Tagln2
Pip5k1b	2.74e-11	0.441351	0.232	0.04	6.94e-07	5	Pip5k1b
Prkce	2.89e-11	0.699209	0.673	0.444	7.3e-07	5	Prkce
B3gat1	3.03e-11	-0.567766	0.426	0.667	7.66e-07	5	B3gat1
Lingo1	3.06e-11	0.333004	0.278	0.064	7.73e-07	5	Lingo1
Pbx3	3.29e-11	-0.594971	0.156	0.407	8.33e-07	5	Pbx3
Ccnd2	3.58e-11	0.395622	0.194	0.024	9.04e-07	5	Ccnd2
Parm1	3.63e-11	-0.596832	0.205	0.475	9.19e-07	5	Parm1
Mmp17	4.66e-11	0.431221	0.395	0.141	1.18e-06	5	Mmp17
Elavl4	4.98e-11	-0.415796	0.635	0.838	1.26e-06	5	Elavl4
Surf4	6.07e-11	-0.484735	0.171	0.421	1.53e-06	5	Surf4
Syndig1l	6.6e-11	0.477034	0.198	0.027	1.67e-06	5	Syndig1l
Slc17a6	6.63e-11	0.503667	0.768	0.646	1.68e-06	5	Slc17a6
Pbx1	7.31e-11	-0.503431	0.757	0.875	1.85e-06	5	Pbx1
Cd164l2	7.43e-11	-0.422126	0.03	0.205	1.88e-06	5	Cd164l2
Glra3	8.08e-11	0.292634	0.129	0.003	2.04e-06	5	Glra3
Fam174b	8.81e-11	-0.450697	0.042	0.229	2.23e-06	5	Fam174b
Bcl11b	9.09e-11	-0.45677	0.068	0.279	2.3e-06	5	Bcl11b
Gng2	9.28e-11	0.636169	0.536	0.269	2.35e-06	5	Gng2
Cpne6	1e-10	0.49696	0.262	0.061	2.54e-06	5	Cpne6
Camk2b	1.15e-10	0.529932	0.817	0.687	2.92e-06	5	Camk2b
Scn8a	1.19e-10	0.599777	0.483	0.239	3e-06	5	Scn8a
Fgf13	1.2e-10	0.547604	0.331	0.114	3.02e-06	5	Fgf13
Rpl18	1.22e-10	-0.525748	0.475	0.677	3.09e-06	5	Rpl18
Hrh3	1.27e-10	0.409117	0.194	0.027	3.22e-06	5	Hrh3
Cox4i1	1.3e-10	-0.557844	0.703	0.852	3.29e-06	5	Cox4i1
Lgi3	1.33e-10	0.438418	0.243	0.051	3.37e-06	5	Lgi3
Igsf21	1.4e-10	0.30261	0.133	0.007	3.54e-06	5	Igsf21
Gda	1.46e-10	0.560275	0.167	0.02	3.68e-06	5	Gda
Ppp3r1	1.92e-10	0.453862	0.806	0.727	4.86e-06	5	Ppp3r1
Lrrc4	2.01e-10	0.374083	0.183	0.024	5.08e-06	5	Lrrc4
Vav2	2.12e-10	-0.550908	0.091	0.31	5.36e-06	5	Vav2
Aplp2	2.27e-10	0.464765	0.787	0.677	5.75e-06	5	Aplp2
Col5a3	2.29e-10	-0.347077	0.011	0.152	5.79e-06	5	Col5a3
Ptprt	2.3e-10	0.541946	0.255	0.061	5.82e-06	5	Ptprt
Rhob	2.38e-10	0.54333	0.544	0.29	6.01e-06	5	Rhob
Prdx1	2.64e-10	-0.406606	0.559	0.795	6.67e-06	5	Prdx1
Sidt1	2.67e-10	0.341302	0.19	0.027	6.76e-06	5	Sidt1
Ccnd1	2.75e-10	0.457658	0.156	0.013	6.96e-06	5	Ccnd1
Hspa4l	2.77e-10	0.568603	0.673	0.519	7e-06	5	Hspa4l
Cd44	2.77e-10	-0.41745	0.004	0.131	7.01e-06	5	Cd44
Pnkd	2.79e-10	0.495067	0.46	0.219	7.06e-06	5	Pnkd
Atp2a2	3.02e-10	0.460824	0.779	0.7	7.64e-06	5	Atp2a2
Ppargc1a	3.08e-10	0.679541	0.357	0.141	7.78e-06	5	Ppargc1a
Sptssa	3.3e-10	-0.552354	0.179	0.431	8.35e-06	5	Sptssa
Tenm4	3.51e-10	0.397404	0.243	0.054	8.86e-06	5	Tenm4
Rab40b	3.82e-10	-0.366437	0.046	0.232	9.67e-06	5	Rab40b
Otx2	3.96e-10	-0.430963	0.008	0.141	1e-05	5	Otx2
Cspg5	4.56e-10	0.583945	0.654	0.525	1.15e-05	5	Cspg5
Akap2	4.84e-10	0.530899	0.331	0.111	1.22e-05	5	Akap2
Spns2	4.88e-10	0.311985	0.144	0.01	1.23e-05	5	Spns2
Kcnip4	5.06e-10	0.619807	0.525	0.337	1.28e-05	5	Kcnip4
Glrb	5.11e-10	0.436433	0.684	0.512	1.29e-05	5	Glrb
Camk2a	5.25e-10	0.610681	0.308	0.098	1.33e-05	5	Camk2a
Pcsk1n	5.59e-10	-0.324935	0.844	0.933	1.41e-05	5	Pcsk1n
Cables1	6.09e-10	-0.44976	0.061	0.253	1.54e-05	5	Cables1
Vamp1	6.61e-10	0.58894	0.399	0.178	1.67e-05	5	Vamp1
Klhl1	7.2e-10	-0.553975	0.152	0.38	1.82e-05	5	Klhl1
A130010J15Rik	9.15e-10	0.379073	0.312	0.098	2.31e-05	5	A130010J15Rik
Cnnm2	9.32e-10	-0.477921	0.08	0.276	2.36e-05	5	Cnnm2
Gabrg2	9.38e-10	0.566887	0.612	0.418	2.37e-05	5	Gabrg2
Lima1	9.54e-10	-0.424756	0.072	0.263	2.41e-05	5	Lima1
Pgrmc1	1.02e-09	0.503624	0.757	0.623	2.57e-05	5	Pgrmc1
Gng10	1.06e-09	-0.317757	0.137	0.37	2.67e-05	5	Gng10
Epha4	1.06e-09	0.52599	0.167	0.024	2.68e-05	5	Epha4
Lmo3	1.09e-09	0.581752	0.19	0.03	2.74e-05	5	Lmo3
Klf9	1.11e-09	0.488488	0.297	0.094	2.82e-05	5	Klf9
Gfra2	1.18e-09	0.386225	0.175	0.024	2.98e-05	5	Gfra2
Thsd7b	1.26e-09	-0.349324	0.061	0.253	3.19e-05	5	Thsd7b
Anp32e	1.31e-09	-0.535707	0.319	0.535	3.32e-05	5	Anp32e
Pcbp2	1.37e-09	-0.387422	0.776	0.855	3.47e-05	5	Pcbp2
Ttc3	1.47e-09	0.450903	0.844	0.771	3.71e-05	5	Ttc3
Srebf2	1.77e-09	-0.526645	0.468	0.677	4.47e-05	5	Srebf2
Vstm2b	1.79e-09	-0.510031	0.281	0.532	4.53e-05	5	Vstm2b
Dazap2	1.82e-09	-0.531986	0.262	0.495	4.6e-05	5	Dazap2
Adcyap1r1	1.83e-09	0.442015	0.297	0.094	4.62e-05	5	Adcyap1r1
Prkca	1.83e-09	-0.435736	0.129	0.357	4.63e-05	5	Prkca
Rasgef1b	1.98e-09	-0.43411	0.072	0.266	5.01e-05	5	Rasgef1b
Tmem150c	1.99e-09	0.441315	0.232	0.054	5.04e-05	5	Tmem150c
Mkl2	2e-09	0.5092	0.297	0.091	5.05e-05	5	Mkl2
Fam163b	2.42e-09	0.419669	0.137	0.01	6.12e-05	5	Fam163b
Tmem35	2.58e-09	-0.579522	0.494	0.697	6.53e-05	5	Tmem35
Parvb	2.62e-09	-0.364974	0.061	0.239	6.62e-05	5	Parvb
Tsc22d1	2.63e-09	0.382771	0.821	0.677	6.65e-05	5	Tsc22d1
Unc5a	2.92e-09	0.400067	0.163	0.02	7.38e-05	5	Unc5a
Plch1	3.14e-09	0.478003	0.255	0.067	7.93e-05	5	Plch1
Kcnip1	3.14e-09	-0.491342	0.133	0.34	7.93e-05	5	Kcnip1
Kcnq3	3.47e-09	0.405374	0.224	0.051	8.76e-05	5	Kcnq3
Wrnip1	3.58e-09	-0.580022	0.38	0.545	9.06e-05	5	Wrnip1
Opcml	3.7e-09	-0.482949	0.395	0.636	9.37e-05	5	Opcml
Ppa1	3.87e-09	-0.492635	0.471	0.667	9.78e-05	5	Ppa1
Rps9	4.26e-09	-0.416606	0.627	0.798	0.000107671	5	Rps9
Cox20	4.29e-09	-0.509083	0.224	0.455	0.000108564	5	Cox20
Smc3	4.4e-09	-0.593144	0.259	0.485	0.000111318	5	Smc3
Glce	4.74e-09	-0.502561	0.122	0.32	0.000119771	5	Glce
Dtd1	4.81e-09	0.525753	0.551	0.306	0.000121662	5	Dtd1
Bcan	5.03e-09	0.281766	0.19	0.034	0.000127101	5	Bcan
Trpc4	5.46e-09	-0.389252	0.046	0.215	0.000138107	5	Trpc4
X2410018L13Rik	5.46e-09	0.315791	0.217	0.047	0.000138155	5	X2410018L13Rik
Prmt8	5.5e-09	0.27306	0.133	0.01	0.000139166	5	Prmt8
Rftn1	5.8e-09	0.270012	0.133	0.01	0.000146668	5	Rftn1
Myt1l	6.37e-09	0.475215	0.551	0.327	0.000160991	5	Myt1l
Cit	6.7e-09	0.490137	0.331	0.131	0.000169425	5	Cit
Camk2g	6.73e-09	0.512053	0.593	0.38	0.000170112	5	Camk2g
Inpp5a	6.79e-09	0.328049	0.274	0.081	0.000171753	5	Inpp5a
Tango2	7.02e-09	0.477517	0.403	0.182	0.00017744	5	Tango2
Cadm3	7.88e-09	0.513631	0.643	0.421	0.00019934	5	Cadm3
Vangl1	8.44e-09	-0.43257	0.224	0.468	0.000213472	5	Vangl1
Ptprz1	1.06e-08	-0.50451	0.19	0.414	0.000268272	5	Ptprz1
Cyp46a1	1.07e-08	0.425847	0.304	0.111	0.000271123	5	Cyp46a1
Endod1	1.08e-08	0.406929	0.373	0.152	0.000273127	5	Endod1
Acly	1.13e-08	-0.497122	0.35	0.579	0.000285237	5	Acly
Cdh2	1.16e-08	0.427519	0.494	0.256	0.000292246	5	Cdh2
Cyfip2	1.18e-08	0.411015	0.81	0.744	0.000298753	5	Cyfip2
A230065H16Rik	1.18e-08	0.264595	0.129	0.01	0.000298917	5	A230065H16Rik
Cldnd1	1.21e-08	-0.471092	0.289	0.505	0.000306325	5	Cldnd1
Clstn3	1.21e-08	0.466458	0.665	0.522	0.000306807	5	Clstn3
Hcn1	1.21e-08	0.289724	0.129	0.01	0.000306992	5	Hcn1
2019-03-04	1.22e-08	-0.421277	0.038	0.192	0.000307779	5	2019-03-04
Pak3	1.22e-08	0.432737	0.76	0.66	0.000307855	5	Pak3
Scp2	1.23e-08	-0.536099	0.392	0.582	0.000311135	5	Scp2
Grm1	1.37e-08	0.404337	0.247	0.067	0.00034592	5	Grm1
Rap2a	1.39e-08	-0.471045	0.247	0.458	0.000352483	5	Rap2a
Sumo2	1.54e-08	-0.337315	0.722	0.835	0.000388969	5	Sumo2
Serp2	1.6e-08	0.356792	0.57	0.323	0.00040389	5	Serp2
Ctsb	1.61e-08	0.379544	0.863	0.795	0.000407799	5	Ctsb
Atp6v1f	1.66e-08	-0.364706	0.646	0.822	0.000418734	5	Atp6v1f
Sncb	1.71e-08	0.323056	0.867	0.808	0.000432155	5	Sncb
Cadm2	1.75e-08	0.576796	0.605	0.451	0.000442018	5	Cadm2
Nefm	1.79e-08	0.565495	0.411	0.232	0.000453657	5	Nefm
Arhgdig	1.8e-08	0.522964	0.475	0.242	0.000454698	5	Arhgdig
Zfp804a	1.89e-08	0.314825	0.114	0.007	0.000477177	5	Zfp804a
Cntfr	1.97e-08	-0.483801	0.175	0.38	0.000499447	5	Cntfr
Arhgef3	2.07e-08	0.295081	0.125	0.01	0.000524383	5	Arhgef3
Erbb4	2.26e-08	-0.372908	0.118	0.323	0.000572717	5	Erbb4
Rgs7	2.27e-08	0.286275	0.221	0.054	0.000573457	5	Rgs7
Serpine2	2.34e-08	0.567977	0.407	0.205	0.00059228	5	Serpine2
Wbscr27	2.38e-08	-0.294129	0.034	0.185	0.000601332	5	Wbscr27
Racgap1	2.39e-08	-0.398508	0.099	0.293	0.000603791	5	Racgap1
Lypd1	2.49e-08	0.390223	0.171	0.03	0.000629812	5	Lypd1
Habp4	2.87e-08	0.492443	0.517	0.306	0.000724551	5	Habp4
Rhoa	2.92e-08	-0.360894	0.376	0.589	0.000737655	5	Rhoa
Wif1	3e-08	-0.70129	0.053	0.185	0.000758455	5	Wif1
Osbpl6	3.01e-08	0.258141	0.24	0.067	0.000761004	5	Osbpl6
Dst	3.08e-08	0.405618	0.791	0.623	0.000779003	5	Dst
Slit2	3.13e-08	-0.48066	0.198	0.401	0.000792598	5	Slit2
Ogfod1	3.27e-08	0.516604	0.578	0.407	0.000827215	5	Ogfod1
Eef1g	3.44e-08	-0.339292	0.646	0.832	0.000869094	5	Eef1g
Osbpl1a	3.47e-08	0.474553	0.312	0.121	0.000878046	5	Osbpl1a
Gria4	3.55e-08	-0.443001	0.281	0.502	0.000897712	5	Gria4
Sema7a	3.62e-08	0.308186	0.141	0.017	0.000915252	5	Sema7a
Pfkp	3.76e-08	0.488048	0.536	0.33	0.000951762	5	Pfkp
Brinp2	3.83e-08	0.292292	0.198	0.044	0.00096946	5	Brinp2
Rasd2	3.91e-08	0.4939	0.373	0.165	0.000989648	5	Rasd2
Insm1	4.02e-08	-0.292264	0.023	0.158	0.00101634	5	Insm1
Galnt13	4.06e-08	-0.431493	0.308	0.549	0.00102681	5	Galnt13
Kctd12	4.2e-08	-0.479297	0.156	0.357	0.00106184	5	Kctd12
Wnt3	4.35e-08	0.300455	0.171	0.03	0.00110026	5	Wnt3
Slco3a1	4.39e-08	0.316401	0.228	0.061	0.00111025	5	Slco3a1
Dkk3	4.47e-08	0.367973	0.11	0.007	0.00112942	5	Dkk3
Hpcal1	4.55e-08	-0.358304	0.487	0.714	0.00115081	5	Hpcal1
Tpt1	4.61e-08	-0.285803	0.875	0.929	0.00116552	5	Tpt1
Vat1	4.74e-08	-0.382201	0.395	0.636	0.00119772	5	Vat1
Coro2b	4.89e-08	-0.453341	0.281	0.465	0.00123772	5	Coro2b
Nlk	5.06e-08	-0.553997	0.156	0.343	0.00127974	5	Nlk
Klhl2	5.15e-08	0.467218	0.247	0.074	0.00130304	5	Klhl2
Rbfox2	5.73e-08	-0.415332	0.399	0.63	0.00144984	5	Rbfox2
Atp5k	6.32e-08	-0.361267	0.624	0.761	0.0015984	5	Atp5k
Gm9962	6.7e-08	0.258253	0.11	0.007	0.00169513	5	Gm9962
Nipsnap3b	6.72e-08	-0.357089	0.095	0.283	0.00169897	5	Nipsnap3b
Brd2	6.77e-08	-0.371611	0.38	0.593	0.00171097	5	Brd2
Camkk2	6.95e-08	0.436895	0.278	0.101	0.00175734	5	Camkk2
AC149090.1	7.02e-08	0.608119	0.433	0.242	0.0017765	5	AC149090.1
Cacna1g	7.32e-08	0.450876	0.331	0.135	0.00185148	5	Cacna1g
Gad2	7.58e-08	0.558856	0.3	0.121	0.00191791	5	Gad2
Hsd17b10	7.69e-08	-0.336846	0.061	0.226	0.0019442	5	Hsd17b10
Pknox2	7.69e-08	-0.410973	0.099	0.286	0.00194421	5	Pknox2
Pkp4	8.06e-08	0.485785	0.316	0.121	0.00203826	5	Pkp4
Gpr85	8.28e-08	-0.44371	0.247	0.468	0.00209308	5	Gpr85
Rcan2	8.51e-08	-0.490924	0.559	0.747	0.00215215	5	Rcan2
Hrasls	8.7e-08	0.261931	0.137	0.017	0.00219915	5	Hrasls
Lpgat1	8.71e-08	0.49917	0.555	0.347	0.00220179	5	Lpgat1
Specc1	9.06e-08	0.33557	0.266	0.088	0.00229006	5	Specc1
H13	1.04e-07	-0.401746	0.388	0.613	0.00261966	5	H13
Necab1	1.05e-07	0.612298	0.3	0.131	0.00266735	5	Necab1
Gadd45g	1.11e-07	0.407602	0.171	0.034	0.00279566	5	Gadd45g
Unc80	1.11e-07	0.461247	0.654	0.444	0.00280245	5	Unc80
Herc3	1.13e-07	0.360914	0.361	0.155	0.00284892	5	Herc3
X2510009E07Rik	1.16e-07	-0.420213	0.125	0.313	0.00292484	5	X2510009E07Rik
Pgpep1	1.18e-07	-0.300193	0.019	0.141	0.00299497	5	Pgpep1
Rpl15	1.19e-07	-0.406386	0.589	0.771	0.003001	5	Rpl15
Brinp3	1.19e-07	-0.519495	0.156	0.343	0.00302033	5	Brinp3
Camkk1	1.2e-07	0.45404	0.312	0.128	0.00304517	5	Camkk1
Atxn7l3b	1.29e-07	0.345336	0.81	0.741	0.00326421	5	Atxn7l3b
Pou2f2	1.31e-07	0.512029	0.304	0.135	0.00331857	5	Pou2f2
Elmo1	1.32e-07	0.449217	0.437	0.293	0.00334091	5	Elmo1
Eif4a2	1.35e-07	-0.280447	0.909	0.96	0.00341476	5	Eif4a2
Sh3bgrl	1.36e-07	-0.461125	0.251	0.458	0.00344322	5	Sh3bgrl
Kalrn	1.4e-07	0.538212	0.175	0.04	0.00354578	5	Kalrn
Rimbp2	1.42e-07	-0.497771	0.179	0.364	0.00358945	5	Rimbp2
Dhrs1	1.48e-07	-0.429814	0.259	0.471	0.00374196	5	Dhrs1
Gas7	1.53e-07	0.333315	0.156	0.027	0.00386615	5	Gas7
Robo1	1.53e-07	-0.328588	0.11	0.296	0.00387015	5	Robo1
Ptprg	1.54e-07	0.302855	0.194	0.047	0.00390479	5	Ptprg
Khdrbs3	1.67e-07	0.488694	0.338	0.145	0.00423085	5	Khdrbs3
Zfp423	1.75e-07	0.25644	0.133	0.017	0.00442497	5	Zfp423
Clstn2	1.89e-07	0.411065	0.198	0.051	0.00477893	5	Clstn2
Pcdh9	1.95e-07	-0.387916	0.316	0.545	0.00494146	5	Pcdh9
Prdx2	2.05e-07	-0.31194	0.605	0.801	0.00518109	5	Prdx2
Sub1	2.13e-07	-0.346105	0.529	0.727	0.00539319	5	Sub1
Slc25a3	2.14e-07	-0.328984	0.757	0.886	0.0054101	5	Slc25a3
Prkcg	2.18e-07	0.364841	0.274	0.098	0.00551558	5	Prkcg
Myl6	2.18e-07	-0.338687	0.802	0.879	0.00552112	5	Myl6
Akr1a1	2.3e-07	-0.344383	0.673	0.791	0.00581272	5	Akr1a1
Mfge8	2.47e-07	-0.291157	0.015	0.121	0.00624686	5	Mfge8
Lrrn3	2.54e-07	-0.396536	0.167	0.367	0.00641507	5	Lrrn3
Rbfox3	2.57e-07	0.511478	0.567	0.38	0.00651026	5	Rbfox3
Id2	2.61e-07	0.349707	0.16	0.03	0.00659179	5	Id2
Twf1	2.62e-07	-0.284872	0.125	0.316	0.0066154	5	Twf1
Fosb	2.69e-07	-0.590559	0.019	0.135	0.00681533	5	Fosb
Pcmt1	2.83e-07	0.50661	0.601	0.414	0.0071511	5	Pcmt1
Cox14	2.91e-07	-0.43091	0.536	0.69	0.00736725	5	Cox14
Scn9a	2.94e-07	-0.3001	0.122	0.31	0.00743123	5	Scn9a
Uqcrh	2.98e-07	-0.359586	0.745	0.855	0.00754793	5	Uqcrh
Lingo2	3.15e-07	0.375938	0.232	0.071	0.00795365	5	Lingo2
Nrp2	3.33e-07	-0.52755	0.342	0.478	0.0084245	5	Nrp2
Kif5a	3.46e-07	0.447268	0.76	0.63	0.00876008	5	Kif5a
Glra1	3.52e-07	0.262769	0.11	0.01	0.00890815	5	Glra1
Myo1b	3.82e-07	-0.444745	0.087	0.253	0.00965859	5	Myo1b
Adgrb1	3.96e-07	0.356127	0.327	0.141	0.0100101	5	Adgrb1
Gprc5b	4.17e-07	0.449592	0.236	0.074	0.0105538	5	Gprc5b
Trim37	4.25e-07	0.487664	0.51	0.316	0.0107486	5	Trim37
Tapbp	4.36e-07	-0.343213	0.221	0.434	0.0110253	5	Tapbp
Pdp1	4.38e-07	0.51466	0.285	0.125	0.0110763	5	Pdp1
Idi1	4.39e-07	-0.473749	0.297	0.495	0.0111118	5	Idi1
Bzw2	4.4e-07	-0.372309	0.144	0.3	0.0111211	5	Bzw2
Mllt6	4.4e-07	-0.375315	0.179	0.38	0.0111392	5	Mllt6
Doc2b	4.47e-07	0.384398	0.285	0.111	0.0113136	5	Doc2b
Jam3	4.51e-07	-0.358483	0.11	0.286	0.0114173	5	Jam3
St5	4.6e-07	-0.326414	0.046	0.185	0.0116437	5	St5
Podxl2	4.69e-07	0.413484	0.525	0.35	0.011853	5	Podxl2
Hint1	4.69e-07	-0.318532	0.757	0.872	0.011854	5	Hint1
Scn1a	4.72e-07	0.266376	0.16	0.034	0.0119392	5	Scn1a
Nomo1	4.76e-07	0.417889	0.392	0.202	0.0120286	5	Nomo1
2019-09-05	4.78e-07	0.535665	0.62	0.451	0.0120832	5	2019-09-05
X6430548M08Rik	4.84e-07	0.400327	0.327	0.141	0.0122424	5	X6430548M08Rik
Sorcs2	4.89e-07	-0.378112	0.11	0.276	0.0123641	5	Sorcs2
BC005537	5.28e-07	-0.428468	0.456	0.636	0.0133568	5	BC005537
Kcnc3	5.41e-07	0.311265	0.205	0.057	0.0136858	5	Kcnc3
Irx1	5.45e-07	-0.37604	0.228	0.441	0.0137781	5	Irx1
Dab1	5.51e-07	0.273822	0.194	0.051	0.0139401	5	Dab1
Cdk14	5.9e-07	-0.417553	0.487	0.657	0.0149124	5	Cdk14
X1190005I06Rik	5.93e-07	-0.262952	0.03	0.158	0.0149972	5	X1190005I06Rik
Bcl2l2	6.18e-07	-0.437338	0.414	0.586	0.0156317	5	Bcl2l2
Pxdn	6.29e-07	0.261655	0.125	0.017	0.0159048	5	Pxdn
Kcnab1	6.32e-07	0.276863	0.125	0.017	0.0159826	5	Kcnab1
Pcdh8	6.85e-07	0.287946	0.125	0.017	0.0173333	5	Pcdh8
Map3k6	6.86e-07	-0.286282	0.011	0.114	0.0173453	5	Map3k6
Fibp	7e-07	-0.261699	0.129	0.313	0.0176962	5	Fibp
Cpne4	7.14e-07	-0.499826	0.27	0.448	0.0180502	5	Cpne4
Ndufs5	7.23e-07	-0.376471	0.498	0.7	0.0182951	5	Ndufs5
Fign	7.4e-07	0.364948	0.228	0.074	0.0187082	5	Fign
Adgrb3	7.66e-07	0.469971	0.582	0.424	0.0193769	5	Adgrb3
Gdf11	8.03e-07	-0.473669	0.171	0.347	0.0203013	5	Gdf11
Ctnnbip1	8.12e-07	-0.321194	0.346	0.566	0.0205272	5	Ctnnbip1
Ncam1	8.18e-07	0.43331	0.825	0.754	0.020686	5	Ncam1
Pip4k2a	8.64e-07	-0.398304	0.084	0.246	0.0218408	5	Pip4k2a
Laptm4b	8.71e-07	0.413841	0.357	0.168	0.0220153	5	Laptm4b
Fgf9	9.15e-07	0.291595	0.202	0.057	0.0231334	5	Fgf9
Prpsap2	9.34e-07	-0.436787	0.259	0.461	0.0236243	5	Prpsap2
Ndufa13	9.62e-07	-0.358624	0.384	0.532	0.0243304	5	Ndufa13
Btbd11	9.67e-07	-0.438669	0.228	0.384	0.0244459	5	Btbd11
Atp5j	9.74e-07	-0.396141	0.536	0.7	0.024623	5	Atp5j
Rasl10b	9.79e-07	-0.312174	0.114	0.286	0.0247603	5	Rasl10b
Pclo	1.03e-06	0.431681	0.635	0.451	0.0261244	5	Pclo
Smad5	1.07e-06	-0.354065	0.095	0.256	0.0271645	5	Smad5
Cnih3	1.11e-06	-0.319962	0.156	0.347	0.0280651	5	Cnih3
Rnf128	1.14e-06	0.311091	0.395	0.195	0.0288367	5	Rnf128
Tshz2	1.17e-06	0.293068	0.129	0.02	0.0297134	5	Tshz2
Psenen	1.19e-06	-0.335322	0.175	0.357	0.0302146	5	Psenen
Rab5c	1.2e-06	-0.431635	0.342	0.492	0.0304685	5	Rab5c
2019-03-08	1.23e-06	-0.370856	0.137	0.316	0.0310967	5	2019-03-08
Nrxn3	1.35e-06	0.515409	0.209	0.071	0.0340377	5	Nrxn3
Rpl7	1.35e-06	-0.330789	0.654	0.771	0.0341687	5	Rpl7
Adcyap1	1.37e-06	-0.327744	0.331	0.545	0.0346846	5	Adcyap1
Ptpre	1.45e-06	0.328255	0.175	0.044	0.0366704	5	Ptpre
Cyp4v3	1.48e-06	-0.2502	0.015	0.114	0.037394	5	Cyp4v3
Nap1l2	1.49e-06	0.448444	0.582	0.404	0.0377662	5	Nap1l2
Rgs17	1.52e-06	0.513141	0.487	0.31	0.0383466	5	Rgs17
Gucy1b3	1.52e-06	-0.481072	0.468	0.599	0.0384438	5	Gucy1b3
Ube3a	1.54e-06	0.404554	0.677	0.549	0.039019	5	Ube3a
Nectin3	1.57e-06	-0.434992	0.125	0.279	0.0396762	5	Nectin3
Ass1	1.57e-06	0.310073	0.262	0.098	0.0397941	5	Ass1
Ociad1	1.59e-06	0.448537	0.772	0.663	0.0402341	5	Ociad1
Rpl23	1.7e-06	-0.378969	0.681	0.808	0.0429198	5	Rpl23
Hdac7	1.7e-06	0.281411	0.209	0.064	0.0431052	5	Hdac7
Iqsec3	1.7e-06	0.323459	0.221	0.071	0.043116	5	Iqsec3
Adcy8	1.72e-06	-0.279049	0.049	0.185	0.0434092	5	Adcy8
Rtn4rl1	1.76e-06	-0.385973	0.213	0.407	0.0445599	5	Rtn4rl1
Rab11fip4	1.76e-06	0.412474	0.365	0.175	0.0446301	5	Rab11fip4
Ech1	1.88e-06	-0.294935	0.061	0.202	0.0475617	5	Ech1
Relt	1.9e-06	0.336928	0.224	0.081	0.048144	5	Relt
Trank1	1.92e-06	0.371673	0.422	0.232	0.0485689	5	Trank1
Snhg14	1.94e-06	0.346799	0.738	0.556	0.04918	5	Snhg14
Scx	2.07e-06	-0.281368	0.03	0.145	0.0522641	5	Scx
Epb41l1	2.13e-06	-0.349776	0.57	0.734	0.053777	5	Epb41l1
Gm13889	2.14e-06	-0.428738	0.103	0.242	0.0541432	5	Gm13889
Srgap3	2.16e-06	0.518021	0.407	0.222	0.054678	5	Srgap3
Hnrnpa1	2.17e-06	-0.311563	0.692	0.808	0.0549711	5	Hnrnpa1
Rundc3a	2.18e-06	-0.368781	0.487	0.66	0.0551662	5	Rundc3a
Nos1ap	2.21e-06	0.252432	0.141	0.027	0.0559932	5	Nos1ap
Cttnbp2	2.24e-06	0.43638	0.331	0.158	0.0565474	5	Cttnbp2
Nav1	2.27e-06	0.367101	0.209	0.074	0.0573105	5	Nav1
Dscam	2.37e-06	0.343335	0.335	0.158	0.0599764	5	Dscam
Ntrk2	2.5e-06	0.43086	0.517	0.32	0.0632619	5	Ntrk2
Eif4b	2.51e-06	-0.41376	0.513	0.673	0.0634807	5	Eif4b
Rnd1	2.52e-06	0.39698	0.19	0.061	0.0638161	5	Rnd1
Cnot3	2.55e-06	0.465994	0.498	0.38	0.0646124	5	Cnot3
Tspan7	2.59e-06	0.29118	0.909	0.859	0.0654596	5	Tspan7
Lrp1	2.69e-06	0.345916	0.49	0.29	0.0679488	5	Lrp1
Cpne7	2.71e-06	0.266106	0.16	0.037	0.0684832	5	Cpne7
Pacsin1	2.73e-06	0.346311	0.703	0.596	0.0689221	5	Pacsin1
Trim35	2.74e-06	-0.353548	0.312	0.512	0.0693341	5	Trim35
Cpne9	2.75e-06	-0.482304	0.144	0.293	0.0695235	5	Cpne9
Dync1i2	2.78e-06	0.391401	0.677	0.542	0.070285	5	Dync1i2
Dusp1	2.92e-06	-0.661567	0.08	0.192	0.0739416	5	Dusp1
Enpp2	2.94e-06	0.418183	0.19	0.057	0.0743799	5	Enpp2
Pgbd5	2.96e-06	0.386466	0.259	0.101	0.074818	5	Pgbd5
Mapk4	3e-06	-0.437523	0.11	0.269	0.0759336	5	Mapk4
B630019K06Rik	3.02e-06	0.275498	0.51	0.303	0.0763998	5	B630019K06Rik
B3gat2	3.08e-06	0.372067	0.16	0.044	0.0778075	5	B3gat2
Hnrnpa2b1	3.16e-06	-0.333642	0.772	0.835	0.0799596	5	Hnrnpa2b1
Matk	3.17e-06	0.351545	0.266	0.104	0.0802056	5	Matk
Ebf1	3.24e-06	-0.439978	0.217	0.37	0.0819757	5	Ebf1
Plk5	3.27e-06	0.358403	0.129	0.024	0.0826275	5	Plk5
Gabrb3	3.47e-06	0.397688	0.555	0.364	0.0877965	5	Gabrb3
Cacybp	3.66e-06	-0.26953	0.631	0.808	0.0926185	5	Cacybp
Ly6h	3.9e-06	0.359834	0.764	0.673	0.098669	5	Ly6h
Rbms1	4.08e-06	-0.464991	0.293	0.478	0.103138	5	Rbms1
Phyh	4.1e-06	-0.401753	0.388	0.542	0.103739	5	Phyh
Rangap1	4.37e-06	0.373446	0.753	0.599	0.110533	5	Rangap1
Sash1	4.37e-06	0.444193	0.217	0.077	0.110593	5	Sash1
X4833423E24Rik	4.51e-06	-1.03815	0.03	0.138	0.114039	5	X4833423E24Rik
Npm1	4.56e-06	-0.356758	0.589	0.721	0.115317	5	Npm1
Nedd4	4.58e-06	-0.302133	0.745	0.835	0.115931	5	Nedd4
Camk2n2	4.7e-06	0.387208	0.62	0.475	0.118972	5	Camk2n2
Mical2	4.78e-06	0.327254	0.205	0.071	0.120948	5	Mical2
Rps7	5.37e-06	-0.331997	0.692	0.805	0.135825	5	Rps7
Golga7b	5.42e-06	-0.295646	0.19	0.377	0.137074	5	Golga7b
Stk32c	5.44e-06	0.446095	0.471	0.283	0.137606	5	Stk32c
Pmepa1	5.49e-06	-0.332583	0.183	0.36	0.138957	5	Pmepa1
Cox5b	5.68e-06	-0.3417	0.597	0.741	0.143688	5	Cox5b
Ubtf	5.75e-06	-0.415558	0.285	0.465	0.145445	5	Ubtf
Lrrcc1	5.93e-06	0.251637	0.179	0.051	0.150061	5	Lrrcc1
Mid1ip1	6.12e-06	-0.353576	0.266	0.455	0.154863	5	Mid1ip1
Pcdh19	6.19e-06	0.455297	0.559	0.37	0.156544	5	Pcdh19
Kcnk2	6.23e-06	0.373197	0.129	0.027	0.157593	5	Kcnk2
Impad1	6.27e-06	0.399495	0.635	0.488	0.158441	5	Impad1
Hhip	6.35e-06	-0.435249	0.061	0.182	0.160561	5	Hhip
Pde1b	6.44e-06	0.361325	0.3	0.135	0.162773	5	Pde1b
Slc3a2	6.68e-06	-0.414142	0.183	0.354	0.168938	5	Slc3a2
Tenm1	6.73e-06	0.4801	0.392	0.209	0.170104	5	Tenm1
Ndufb11	6.88e-06	-0.349762	0.38	0.535	0.174001	5	Ndufb11
Atp6v1g2	7.38e-06	0.366454	0.715	0.623	0.18662	5	Atp6v1g2
Zbtb7a	7.43e-06	0.379304	0.646	0.512	0.187885	5	Zbtb7a
Rpl36a	7.52e-06	-0.363188	0.529	0.643	0.190227	5	Rpl36a
Kcnd2	7.55e-06	0.303758	0.209	0.071	0.190942	5	Kcnd2
Chn1	7.85e-06	0.490495	0.7	0.582	0.198487	5	Chn1
Jdp2	7.97e-06	0.286451	0.19	0.061	0.201578	5	Jdp2
Tuba4a	8.15e-06	0.372938	0.525	0.343	0.206027	5	Tuba4a
Cnnm1	8.17e-06	0.362447	0.202	0.077	0.206718	5	Cnnm1
Diras1	8.21e-06	0.275091	0.24	0.091	0.207701	5	Diras1
Dfna5	8.49e-06	-0.318605	0.118	0.276	0.214635	5	Dfna5
Fxyd6	8.83e-06	0.41232	0.529	0.475	0.223361	5	Fxyd6
Tceb2	9.43e-06	-0.321773	0.502	0.677	0.238524	5	Tceb2
Tmem117	9.47e-06	-0.346826	0.065	0.182	0.239604	5	Tmem117
Apba2	9.73e-06	0.434061	0.487	0.34	0.246187	5	Apba2
Sel1l	9.85e-06	0.319771	0.635	0.441	0.24915	5	Sel1l
Fam98b	9.94e-06	-0.342838	0.281	0.461	0.25135	5	Fam98b
Prrt2	1.02e-05	0.400186	0.502	0.35	0.257868	5	Prrt2
Sox4	1.04e-05	-0.307916	0.16	0.333	0.264049	5	Sox4
Prdx3	1.08e-05	-0.346522	0.384	0.559	0.272668	5	Prdx3
Galnt16	1.08e-05	-0.331166	0.494	0.667	0.273127	5	Galnt16
Tvp23b	1.1e-05	-0.412419	0.179	0.347	0.277729	5	Tvp23b
Clip4	1.11e-05	0.427733	0.414	0.236	0.2804	5	Clip4
Kcnk1	1.11e-05	0.310574	0.198	0.067	0.281937	5	Kcnk1
Uqcc1	1.12e-05	-0.388492	0.27	0.438	0.282625	5	Uqcc1
Slc7a8	1.17e-05	-0.268818	0.103	0.256	0.29539	5	Slc7a8
Laptm4a	1.19e-05	-0.318856	0.662	0.791	0.299791	5	Laptm4a
Cfap61	1.23e-05	-0.253566	0.034	0.145	0.31171	5	Cfap61
Wsb1	1.24e-05	0.406677	0.513	0.343	0.313456	5	Wsb1
Rabggtb	1.24e-05	-0.390453	0.289	0.458	0.31467	5	Rabggtb
Tmtc2	1.26e-05	-0.284216	0.046	0.165	0.318245	5	Tmtc2
Rap1b	1.28e-05	-0.363339	0.186	0.35	0.32394	5	Rap1b
Lbh	1.29e-05	-0.324837	0.266	0.455	0.326066	5	Lbh
Slc25a1	1.35e-05	-0.267805	0.099	0.249	0.340188	5	Slc25a1
Capza1	1.38e-05	-0.343507	0.319	0.492	0.34863	5	Capza1
X1700020I14Rik	1.39e-05	0.373328	0.376	0.212	0.350837	5	X1700020I14Rik
Peg10	1.39e-05	-0.572517	0.087	0.205	0.351584	5	Peg10
Srsf2	1.44e-05	-0.391505	0.605	0.707	0.364522	5	Srsf2
D430019H16Rik	1.44e-05	0.320776	0.205	0.071	0.364938	5	D430019H16Rik
Hibadh	1.44e-05	-0.355477	0.319	0.502	0.365022	5	Hibadh
Arrb1	1.49e-05	0.362141	0.281	0.128	0.375584	5	Arrb1
Limch1	1.49e-05	0.341571	0.209	0.074	0.375696	5	Limch1
AI504432	1.49e-05	0.405648	0.281	0.125	0.377015	5	AI504432
Wipi1	1.54e-05	-0.387652	0.118	0.249	0.388678	5	Wipi1
Irf2bpl	1.54e-05	-0.448866	0.3	0.384	0.390097	5	Irf2bpl
St6galnac5	1.64e-05	-0.458209	0.312	0.471	0.413663	5	St6galnac5
Phactr2	1.65e-05	-0.321164	0.118	0.263	0.418243	5	Phactr2
Ttyh1	1.66e-05	0.31902	0.392	0.212	0.420731	5	Ttyh1
Atp9a	1.67e-05	0.332817	0.726	0.586	0.421903	5	Atp9a
Atp6v1g1	1.74e-05	-0.258407	0.593	0.754	0.4399	5	Atp6v1g1
Stard10	1.74e-05	-0.348443	0.148	0.303	0.440105	5	Stard10
Atp8a1	1.77e-05	0.419687	0.498	0.35	0.44696	5	Atp8a1
Gramd1b	1.82e-05	0.341118	0.319	0.155	0.461109	5	Gramd1b
Tnr	1.83e-05	-0.353411	0.205	0.37	0.46284	5	Tnr
Ackr1	1.85e-05	0.321592	0.384	0.215	0.467123	5	Ackr1
Anp32b	1.89e-05	-0.360352	0.236	0.35	0.477159	5	Anp32b
Idh1	1.89e-05	-0.383295	0.274	0.458	0.478626	5	Idh1
Ralbp1	1.9e-05	-0.356463	0.308	0.485	0.48065	5	Ralbp1
Msmo1	1.9e-05	-0.39828	0.43	0.572	0.480871	5	Msmo1
Mtus1	1.92e-05	-0.318833	0.106	0.246	0.485254	5	Mtus1
Vwa1	1.94e-05	0.265365	0.114	0.024	0.491078	5	Vwa1
Tmem59l	1.96e-05	0.316473	0.692	0.549	0.496414	5	Tmem59l
Pea15a	1.99e-05	-0.352711	0.57	0.697	0.504496	5	Pea15a
Prlr	2e-05	0.263525	0.114	0.024	0.50652	5	Prlr
Acadm	2.04e-05	-0.257677	0.125	0.283	0.515867	5	Acadm
Frmpd4	2.15e-05	-0.322789	0.156	0.313	0.543372	5	Frmpd4
Pura	2.2e-05	0.289781	0.814	0.737	0.557126	5	Pura
Rpl13	2.27e-05	-0.296677	0.593	0.744	0.573179	5	Rpl13
Cers2	2.32e-05	-0.373548	0.213	0.364	0.587487	5	Cers2
Tpd52	2.35e-05	-0.350439	0.236	0.407	0.593036	5	Tpd52
Hmgcr	2.4e-05	-0.384413	0.262	0.444	0.605955	5	Hmgcr
Lrrtm3	2.41e-05	0.359284	0.217	0.081	0.60897	5	Lrrtm3
Wasf1	2.46e-05	0.370162	0.281	0.131	0.622904	5	Wasf1
Kcnj3	2.5e-05	0.443413	0.228	0.098	0.632626	5	Kcnj3
Fam53c	2.55e-05	-0.370392	0.175	0.337	0.644243	5	Fam53c
Runx1t1	2.61e-05	0.39677	0.308	0.148	0.661278	5	Runx1t1
Kifap3	2.74e-05	0.33596	0.692	0.556	0.693592	5	Kifap3
Tppp3	2.82e-05	-0.362969	0.331	0.508	0.71313	5	Tppp3
Ttyh3	2.84e-05	0.382186	0.456	0.293	0.718788	5	Ttyh3
Hspe1	2.94e-05	-0.391477	0.449	0.596	0.744661	5	Hspe1
H3f3a	3.2e-05	-0.363961	0.574	0.707	0.809066	5	H3f3a
Tub	3.25e-05	-0.305013	0.35	0.515	0.821036	5	Tub
Zbtb18	3.25e-05	0.440136	0.221	0.101	0.821618	5	Zbtb18
Plcb4	3.26e-05	0.268718	0.323	0.162	0.824358	5	Plcb4
Ets2	3.29e-05	0.352771	0.243	0.101	0.831593	5	Ets2
Clybl	3.32e-05	-0.264389	0.084	0.219	0.84059	5	Clybl
Smg7	3.33e-05	-0.291003	0.152	0.31	0.841245	5	Smg7
Ptms	3.33e-05	-0.353641	0.692	0.788	0.842678	5	Ptms
Stip1	3.39e-05	-0.335043	0.563	0.69	0.856262	5	Stip1
Hes6	3.4e-05	-0.311	0.11	0.256	0.860153	5	Hes6
Matr3	3.41e-05	0.317108	0.677	0.572	0.861334	5	Matr3
Bex1	3.43e-05	-0.358626	0.452	0.606	0.866286	5	Bex1
Mtx2	3.5e-05	-0.401284	0.338	0.502	0.884365	5	Mtx2
Celf6	3.51e-05	-0.289605	0.354	0.539	0.88696	5	Celf6
Mapk8ip2	3.53e-05	-0.279212	0.715	0.785	0.893773	5	Mapk8ip2
Fam110b	3.74e-05	0.29441	0.152	0.047	0.945195	5	Fam110b
Prokr2	3.75e-05	0.415316	0.255	0.111	0.947495	5	Prokr2
Wdr47	3.8e-05	0.299948	0.475	0.293	0.960383	5	Wdr47
U2af1l4	3.84e-05	-0.278844	0.118	0.266	0.969861	5	U2af1l4
Atp6ap2	3.84e-05	0.403201	0.738	0.646	0.96999	5	Atp6ap2
Phyhip	3.89e-05	0.313087	0.338	0.182	0.98278	5	Phyhip
Cep83os	3.9e-05	-0.276033	0.046	0.155	0.986395	5	Cep83os
Rpl3	3.93e-05	-0.292182	0.787	0.865	0.993862	5	Rpl3
Ctsl	3.95e-05	-0.347665	0.289	0.444	0.998383	5	Ctsl
2019-03-11	3.97e-05	-0.276594	0.046	0.141	1	5	2019-03-11
Dclk1	4e-05	-0.319609	0.624	0.764	1	5	Dclk1
Tubb2b	4.12e-05	-0.426521	0.278	0.434	1	5	Tubb2b
Ran	4.15e-05	-0.28826	0.776	0.875	1	5	Ran
Rnf220	4.18e-05	0.346487	0.54	0.374	1	5	Rnf220
Focad	4.18e-05	-0.378211	0.148	0.3	1	5	Focad
Foxp2	4.19e-05	-0.358357	0.129	0.273	1	5	Foxp2
Cacna2d2	4.22e-05	-0.311743	0.593	0.731	1	5	Cacna2d2
Btbd1	4.47e-05	-0.363651	0.399	0.549	1	5	Btbd1
Dcaf11	4.48e-05	-0.327051	0.224	0.367	1	5	Dcaf11
Tanc1	4.5e-05	0.306468	0.335	0.182	1	5	Tanc1
Nono	4.5e-05	-0.324001	0.46	0.63	1	5	Nono
Lmo4	4.52e-05	0.516032	0.19	0.071	1	5	Lmo4
Wbp2	4.52e-05	-0.282875	0.719	0.822	1	5	Wbp2
Ly6e	4.87e-05	0.360105	0.452	0.293	1	5	Ly6e
Rida	5.01e-05	-0.267528	0.152	0.31	1	5	Rida
Trim32	5.03e-05	0.303743	0.639	0.485	1	5	Trim32
Mex3c	5.13e-05	-0.285321	0.095	0.205	1	5	Mex3c
Pde6d	5.37e-05	-0.339897	0.251	0.404	1	5	Pde6d
Rims3	5.38e-05	0.353349	0.403	0.279	1	5	Rims3
Astn1	5.45e-05	0.250828	0.555	0.37	1	5	Astn1
Rgs4	5.46e-05	-0.493527	0.316	0.458	1	5	Rgs4
Hdac11	5.49e-05	0.329986	0.601	0.448	1	5	Hdac11
Smim17	5.69e-05	0.305963	0.255	0.118	1	5	Smim17
Ndufb4	5.7e-05	-0.290653	0.373	0.552	1	5	Ndufb4
Exosc2	5.71e-05	-0.296242	0.373	0.556	1	5	Exosc2
Sms	5.72e-05	0.312935	0.593	0.434	1	5	Sms
Cntnap1	5.8e-05	0.274033	0.262	0.118	1	5	Cntnap1
Dact3	5.92e-05	-0.322525	0.175	0.323	1	5	Dact3
Ppp1r14b	6.07e-05	-0.287125	0.106	0.242	1	5	Ppp1r14b
Gls2	6.08e-05	0.305069	0.16	0.064	1	5	Gls2
Pde4a	6.24e-05	0.353044	0.43	0.279	1	5	Pde4a
Grb10	6.26e-05	-0.26272	0.471	0.636	1	5	Grb10
Pld5	6.32e-05	-0.363258	0.16	0.303	1	5	Pld5
Pgd	6.41e-05	-0.344014	0.171	0.316	1	5	Pgd
Chmp2b	6.6e-05	-0.270515	0.133	0.283	1	5	Chmp2b
Fpgt	6.6e-05	-0.267141	0.034	0.131	1	5	Fpgt
Rprm	6.65e-05	-0.524306	0.122	0.249	1	5	Rprm
Tspyl5	6.81e-05	0.315718	0.217	0.091	1	5	Tspyl5
Efr3a	6.83e-05	0.367018	0.551	0.418	1	5	Efr3a
Arl15	6.85e-05	-0.292867	0.076	0.202	1	5	Arl15
Rab4a	6.85e-05	-0.295478	0.198	0.347	1	5	Rab4a
Rnf10	7.03e-05	-0.319928	0.361	0.525	1	5	Rnf10
Rps10	7.14e-05	-0.265827	0.616	0.707	1	5	Rps10
Scamp1	7.16e-05	0.31266	0.711	0.586	1	5	Scamp1
Acox1	7.17e-05	-0.291085	0.422	0.572	1	5	Acox1
Ubc	7.54e-05	-0.260624	0.829	0.889	1	5	Ubc
Kitl	7.56e-05	0.378972	0.468	0.303	1	5	Kitl
Pdcl3	7.78e-05	-0.270899	0.122	0.266	1	5	Pdcl3
Thra	7.86e-05	0.301345	0.643	0.549	1	5	Thra
Itfg2	7.96e-05	-0.272207	0.148	0.293	1	5	Itfg2
Pja2	8.18e-05	0.27599	0.798	0.7	1	5	Pja2
Plxna2	8.21e-05	0.41906	0.27	0.135	1	5	Plxna2
Jkamp	8.33e-05	-0.315222	0.51	0.667	1	5	Jkamp
Dpp10	8.38e-05	0.273882	0.563	0.38	1	5	Dpp10
Mab21l2	8.39e-05	-0.41758	0.084	0.199	1	5	Mab21l2
Ptprm	8.43e-05	0.258447	0.141	0.04	1	5	Ptprm
Tmem56	8.53e-05	-0.418913	0.217	0.374	1	5	Tmem56
Hivep2	8.71e-05	0.268263	0.285	0.138	1	5	Hivep2
Tpm1	8.97e-05	0.325684	0.342	0.199	1	5	Tpm1
Ank	9.1e-05	0.359922	0.373	0.219	1	5	Ank
Med10	9.12e-05	-0.307973	0.133	0.273	1	5	Med10
Snx12	9.15e-05	-0.31018	0.163	0.316	1	5	Snx12
Fem1b	9.18e-05	-0.325884	0.395	0.539	1	5	Fem1b
Cds1	9.8e-05	0.311081	0.27	0.131	1	5	Cds1
Lrrc8d	9.81e-05	-0.303275	0.129	0.273	1	5	Lrrc8d
X1810026J23Rik	9.84e-05	-0.295921	0.228	0.384	1	5	X1810026J23Rik
Creg2	9.96e-05	0.325525	0.243	0.108	1	5	Creg2
Timm8b	0.0001	-0.300489	0.51	0.673	1	5	Timm8b
Rpl39	0.000101265	-0.262845	0.464	0.636	1	5	Rpl39
Atp5j2	0.000104408	-0.271339	0.418	0.593	1	5	Atp5j2
Fam102b	0.000106187	0.377402	0.259	0.131	1	5	Fam102b
X6330403A02Rik	0.000108039	0.400878	0.198	0.091	1	5	X6330403A02Rik
Tpp1	0.000110037	-0.311781	0.289	0.448	1	5	Tpp1
Grem2	0.000113146	0.403395	0.194	0.074	1	5	Grem2
Ccdc184	0.000116008	0.314455	0.304	0.155	1	5	Ccdc184
Plcb1	0.000117828	0.398332	0.16	0.054	1	5	Plcb1
Mllt3	0.000126099	-0.270185	0.156	0.296	1	5	Mllt3
Fam168b	0.000127921	0.251322	0.513	0.337	1	5	Fam168b
Myo5a	0.000129331	0.331869	0.213	0.088	1	5	Myo5a
Tmprss11a	0.000129407	0.649595	0.365	0.226	1	5	Tmprss11a
Clvs1	0.000133768	0.251627	0.163	0.057	1	5	Clvs1
Ephb6	0.000138951	0.37883	0.27	0.138	1	5	Ephb6
Ppp1cc	0.000140183	-0.392373	0.441	0.586	1	5	Ppp1cc
Hlf	0.000140484	0.434364	0.3	0.165	1	5	Hlf
Pitpnm1	0.000143092	-0.357371	0.262	0.411	1	5	Pitpnm1
Slc1a1	0.000151069	0.334414	0.308	0.162	1	5	Slc1a1
Cisd3	0.000151475	-0.260986	0.198	0.35	1	5	Cisd3
Rpl7a	0.000152616	-0.273281	0.319	0.485	1	5	Rpl7a
Rps16	0.000153344	-0.266639	0.612	0.734	1	5	Rps16
Rnf141	0.000153498	-0.339265	0.114	0.229	1	5	Rnf141
Wscd1	0.000156334	-0.32591	0.259	0.407	1	5	Wscd1
Aldoa	0.000157455	-0.271465	0.757	0.848	1	5	Aldoa
Sdccag8	0.00016096	0.305313	0.232	0.104	1	5	Sdccag8
2019-09-04	0.000162475	0.326867	0.205	0.084	1	5	2019-09-04
Slc35c2	0.000163512	-0.385039	0.213	0.357	1	5	Slc35c2
Tmem106c	0.000168184	0.308797	0.262	0.125	1	5	Tmem106c
Nckap1	0.000169048	0.319069	0.616	0.502	1	5	Nckap1
Cntn2	0.000169426	-0.277063	0.205	0.347	1	5	Cntn2
Fez1	0.000171189	0.403145	0.574	0.414	1	5	Fez1
Fgf1	0.00017209	0.311036	0.255	0.125	1	5	Fgf1
Ugp2	0.000173259	-0.307457	0.289	0.441	1	5	Ugp2
Ubb	0.000176395	-0.280393	0.654	0.744	1	5	Ubb
Gas6	0.000178086	0.333931	0.35	0.195	1	5	Gas6
Lrrc58	0.000178989	-0.327472	0.262	0.411	1	5	Lrrc58
Prpf4	0.000181967	-0.274246	0.053	0.158	1	5	Prpf4
Cirbp	0.000184683	-0.288438	0.551	0.7	1	5	Cirbp
Nudt16l1	0.000188774	-0.321067	0.175	0.286	1	5	Nudt16l1
Btg1	0.000189728	-0.331051	0.175	0.313	1	5	Btg1
Tnfrsf21	0.000189728	0.314281	0.293	0.152	1	5	Tnfrsf21
Pink1	0.000191412	0.344638	0.616	0.535	1	5	Pink1
Med16	0.000193451	-0.350657	0.148	0.283	1	5	Med16
Pde10a	0.00019562	0.254514	0.137	0.04	1	5	Pde10a
Alcam	0.000198715	-0.361062	0.354	0.515	1	5	Alcam
Tmeff2	0.000199435	0.303799	0.35	0.195	1	5	Tmeff2
Ftx	0.000200608	0.269009	0.156	0.054	1	5	Ftx
Mrps6	0.00020254	-0.282676	0.141	0.279	1	5	Mrps6
Pcsk1	0.000204491	-0.294065	0.095	0.215	1	5	Pcsk1
Rab28	0.000204642	-0.266855	0.224	0.384	1	5	Rab28
Arhgap24	0.000206397	0.350929	0.213	0.091	1	5	Arhgap24
Nt5dc3	0.000207814	0.31723	0.346	0.202	1	5	Nt5dc3
Chst8	0.000209363	-0.285579	0.103	0.226	1	5	Chst8
Asphd2	0.000212792	0.290913	0.312	0.165	1	5	Asphd2
Yipf4	0.000213167	-0.311146	0.376	0.505	1	5	Yipf4
Xpr1	0.000213249	-0.373202	0.376	0.502	1	5	Xpr1
Arhgap44	0.000214199	0.340381	0.418	0.263	1	5	Arhgap44
Rps21	0.000217127	-0.305079	0.749	0.825	1	5	Rps21
Srsf1	0.000217372	-0.32656	0.513	0.63	1	5	Srsf1
Exoc1	0.000220337	0.324559	0.475	0.33	1	5	Exoc1
Dnajc12	0.000221776	-0.312509	0.297	0.441	1	5	Dnajc12
Magee2	0.000226223	-0.289476	0.072	0.185	1	5	Magee2
Dock9	0.000228144	0.334864	0.194	0.084	1	5	Dock9
Adipor1	0.000229434	-0.306823	0.259	0.407	1	5	Adipor1
X2610001J05Rik	0.00023283	-0.356215	0.236	0.37	1	5	X2610001J05Rik
Vdac2	0.000232961	-0.266389	0.768	0.855	1	5	Vdac2
Iscu	0.000239414	0.295377	0.627	0.545	1	5	Iscu
Brsk2	0.000243675	0.25549	0.323	0.175	1	5	Brsk2
Serf2	0.000245236	-0.329925	0.433	0.579	1	5	Serf2
Itgb1	0.000246676	-0.304284	0.125	0.246	1	5	Itgb1
Purb	0.000248377	-0.291073	0.639	0.764	1	5	Purb
Enah	0.00025011	0.297346	0.665	0.542	1	5	Enah
Fam168a	0.00025348	0.316532	0.395	0.263	1	5	Fam168a
Inadl	0.000267549	0.356958	0.186	0.081	1	5	Inadl
Ndufa1	0.000269561	-0.316464	0.414	0.549	1	5	Ndufa1
Tle4	0.000272158	-0.377799	0.167	0.296	1	5	Tle4
Hmgn1	0.000274342	-0.306233	0.278	0.438	1	5	Hmgn1
Aqp6	0.000274543	-0.272238	0.038	0.131	1	5	Aqp6
Insig2	0.000282847	-0.277141	0.171	0.316	1	5	Insig2
Nrp1	0.000283125	0.26982	0.24	0.111	1	5	Nrp1
Ndufv2	0.00029594	-0.278736	0.529	0.667	1	5	Ndufv2
Atf5	0.000298255	-0.39966	0.087	0.168	1	5	Atf5
Smc2	0.000298567	-0.332109	0.065	0.172	1	5	Smc2
Zc3hc1	0.00030735	0.341765	0.787	0.697	1	5	Zc3hc1
Cul1	0.000312788	0.30386	0.502	0.357	1	5	Cul1
Bub3	0.000313093	-0.323765	0.308	0.414	1	5	Bub3
R3hdm4	0.000316968	-0.282837	0.125	0.242	1	5	R3hdm4
Fam172a	0.000328329	-0.259803	0.114	0.219	1	5	Fam172a
Slc1a2	0.000329046	0.334406	0.274	0.138	1	5	Slc1a2
Hnrnpc	0.000330599	-0.289015	0.624	0.727	1	5	Hnrnpc
Pnp	0.000332689	-0.313179	0.061	0.158	1	5	Pnp
Ndrg3	0.000333222	0.285202	0.783	0.697	1	5	Ndrg3
Erc2	0.000333992	-0.276169	0.236	0.391	1	5	Erc2
Paqr8	0.000341746	0.295485	0.251	0.121	1	5	Paqr8
Nr2f2	0.000347683	0.441165	0.19	0.098	1	5	Nr2f2
Cd200	0.000350441	0.416087	0.532	0.458	1	5	Cd200
Pbx4	0.000352495	-0.319325	0.144	0.273	1	5	Pbx4
Uqcr11	0.00035888	-0.272693	0.399	0.552	1	5	Uqcr11
Hnrnpab	0.000364222	-0.28491	0.445	0.566	1	5	Hnrnpab
Lamp1	0.00036599	0.273083	0.608	0.451	1	5	Lamp1
Tprgl	0.00037682	-0.300041	0.589	0.721	1	5	Tprgl
Mmd	0.000379441	0.414142	0.213	0.098	1	5	Mmd
Scube1	0.000390714	-0.274049	0.084	0.195	1	5	Scube1
Bicd1	0.000398212	0.333762	0.468	0.32	1	5	Bicd1
Nav2	0.000398844	0.296298	0.243	0.118	1	5	Nav2
H2afv	0.000400081	-0.336175	0.243	0.37	1	5	H2afv
Clip1	0.000403691	0.292572	0.494	0.35	1	5	Clip1
Nol4	0.000407837	-0.381859	0.24	0.384	1	5	Nol4
Gnb2	0.000411493	0.273343	0.654	0.589	1	5	Gnb2
Fam171b	0.000415234	0.3654	0.525	0.401	1	5	Fam171b
Rnf112	0.000416146	0.326512	0.441	0.286	1	5	Rnf112
Atp1b3	0.000424353	0.348124	0.513	0.374	1	5	Atp1b3
Nsa2	0.000436298	-0.307803	0.274	0.394	1	5	Nsa2
Lrp11	0.000440302	-0.295937	0.46	0.606	1	5	Lrp11
Sgpp1	0.000440999	-0.351028	0.148	0.259	1	5	Sgpp1
X1700025G04Rik	0.000459444	0.260842	0.255	0.138	1	5	X1700025G04Rik
Pou6f2	0.000463635	-0.263188	0.091	0.209	1	5	Pou6f2
Noct	0.000464538	-0.264761	0.506	0.596	1	5	Noct
Acsl3	0.000476011	0.271344	0.437	0.286	1	5	Acsl3
Morn4	0.000476472	-0.26447	0.243	0.391	1	5	Morn4
Taok1	0.000479905	0.294954	0.631	0.485	1	5	Taok1
Hmgb1	0.000484695	-0.272411	0.608	0.737	1	5	Hmgb1
Atad1	0.000487492	-0.307183	0.365	0.512	1	5	Atad1
Zc3h7b	0.000488753	-0.320982	0.308	0.451	1	5	Zc3h7b
Snap91	0.000514087	0.294879	0.635	0.502	1	5	Snap91
Ttc7b	0.000542066	0.310931	0.487	0.327	1	5	Ttc7b
Frmd4a	0.000547731	0.305038	0.236	0.118	1	5	Frmd4a
Rpl41	0.000552026	-0.25165	0.578	0.707	1	5	Rpl41
Grm5	0.000557667	-0.321804	0.426	0.566	1	5	Grm5
Efnb3	0.000560248	-0.255624	0.373	0.522	1	5	Efnb3
Prdx6	0.000569572	-0.259289	0.11	0.232	1	5	Prdx6
Oprl1	0.000623442	-0.262773	0.274	0.428	1	5	Oprl1
Bnip3l	0.000635372	-0.267719	0.669	0.778	1	5	Bnip3l
Golga7	0.000653475	-0.287934	0.228	0.37	1	5	Golga7
Pld3	0.00065364	0.301847	0.605	0.478	1	5	Pld3
Mal2	0.000667618	0.32065	0.342	0.205	1	5	Mal2
Ptpn5	0.000676176	0.293137	0.388	0.256	1	5	Ptpn5
Arl6	0.000703098	-0.309275	0.274	0.391	1	5	Arl6
Ogfrl1	0.000704185	0.273738	0.338	0.199	1	5	Ogfrl1
Acad9	0.000710055	0.317622	0.43	0.29	1	5	Acad9
Oard1	0.000735826	-0.284805	0.091	0.202	1	5	Oard1
Lrrc4c	0.000752537	0.30105	0.281	0.152	1	5	Lrrc4c
Sptan1	0.000754259	0.282245	0.684	0.579	1	5	Sptan1
Eps15	0.000754608	0.396642	0.411	0.276	1	5	Eps15
Senp2	0.00077145	0.302617	0.354	0.226	1	5	Senp2
Insig1	0.000780398	-0.337677	0.266	0.407	1	5	Insig1
Rpl5	0.00078992	-0.265424	0.578	0.684	1	5	Rpl5
Fbxo34	0.000790652	0.257722	0.205	0.094	1	5	Fbxo34
Phkg1	0.00080467	0.268595	0.795	0.677	1	5	Phkg1
F730043M19Rik	0.000817616	0.271809	0.171	0.081	1	5	F730043M19Rik
Celf3	0.000835514	-0.270738	0.297	0.441	1	5	Celf3
Rps14	0.000848223	-0.283879	0.665	0.778	1	5	Rps14
Fdft1	0.000849441	-0.303249	0.319	0.458	1	5	Fdft1
Csrnp3	0.000849885	0.280789	0.399	0.253	1	5	Csrnp3
Lrrtm1	0.000869086	0.265889	0.144	0.057	1	5	Lrrtm1
Mapk8ip3	0.000894515	0.258457	0.631	0.569	1	5	Mapk8ip3
Txn2	0.000896454	-0.328909	0.441	0.576	1	5	Txn2
Hgsnat	0.000898802	0.278711	0.205	0.098	1	5	Hgsnat
Tmbim6	0.000909494	-0.25274	0.673	0.758	1	5	Tmbim6
Tbc1d14	0.00092073	-0.250048	0.186	0.323	1	5	Tbc1d14
Fam19a2	0.000924826	0.277428	0.3	0.172	1	5	Fam19a2
Slc48a1	0.000929145	0.304086	0.335	0.212	1	5	Slc48a1
Eno1	0.000936822	-0.265883	0.361	0.495	1	5	Eno1
Abhd10	0.000939348	-0.289809	0.141	0.259	1	5	Abhd10
Aldh6a1	0.000943199	-0.258074	0.08	0.182	1	5	Aldh6a1
Ei24	0.000956062	-0.343391	0.228	0.327	1	5	Ei24
Tmem30a	0.000957593	0.258646	0.772	0.707	1	5	Tmem30a
Rps5	0.000960228	-0.25772	0.593	0.71	1	5	Rps5
Phf5a	0.000971464	-0.252096	0.183	0.31	1	5	Phf5a
X2010107E04Rik	0.000984571	-0.263566	0.502	0.64	1	5	X2010107E04Rik
Arl2bp	0.0010108	-0.287486	0.536	0.67	1	5	Arl2bp
Pde7a	0.00102285	0.253934	0.175	0.074	1	5	Pde7a
Bex4	0.00103052	-0.328489	0.274	0.407	1	5	Bex4
Sf1	0.00104039	-0.306128	0.437	0.522	1	5	Sf1
Tmod2	0.00111819	0.291747	0.574	0.488	1	5	Tmod2
Nub1	0.00115922	-0.337645	0.285	0.418	1	5	Nub1
Dgcr6	0.00117027	-0.270291	0.247	0.35	1	5	Dgcr6
Dbi	0.00117645	-0.396781	0.289	0.38	1	5	Dbi
Dnm1	0.00119605	0.327215	0.567	0.434	1	5	Dnm1
Paqr7	0.00120337	0.262661	0.175	0.074	1	5	Paqr7
Nup93	0.00122251	-0.253846	0.072	0.158	1	5	Nup93
Cers4	0.0012361	-0.307952	0.433	0.552	1	5	Cers4
Cetn3	0.00123897	-0.287863	0.221	0.354	1	5	Cetn3
Tspan2	0.00124033	0.275267	0.209	0.101	1	5	Tspan2
Leprot	0.00124285	-0.335114	0.122	0.219	1	5	Leprot
Ntrk3	0.00125614	0.315875	0.437	0.303	1	5	Ntrk3
Spcs3	0.00128052	-0.265567	0.228	0.367	1	5	Spcs3
Dmtf1	0.00128974	0.269402	0.297	0.172	1	5	Dmtf1
Slc25a51	0.00130234	-0.318119	0.411	0.529	1	5	Slc25a51
Gm4076	0.00134063	0.274896	0.475	0.391	1	5	Gm4076
Kcnab3	0.0013523	0.319849	0.122	0.04	1	5	Kcnab3
X2010300C02Rik	0.00135444	0.436992	0.156	0.074	1	5	X2010300C02Rik
Plcl1	0.00138024	-0.280042	0.19	0.306	1	5	Plcl1
Plbd2	0.00138986	0.279258	0.209	0.101	1	5	Plbd2
Brinp1	0.00139233	-0.419783	0.243	0.36	1	5	Brinp1
Clmn	0.00140053	0.277822	0.213	0.111	1	5	Clmn
Hmgcs1	0.00141699	-0.392649	0.46	0.589	1	5	Hmgcs1
Atp11b	0.0014263	0.263756	0.3	0.172	1	5	Atp11b
Myh10	0.00149402	0.267883	0.529	0.407	1	5	Myh10
2019-09-03	0.001496	0.278221	0.521	0.455	1	5	2019-09-03
Adgrl2	0.00152517	0.260854	0.179	0.081	1	5	Adgrl2
Slc39a10	0.00152763	0.351205	0.475	0.347	1	5	Slc39a10
Hacd3	0.00152912	0.359624	0.555	0.421	1	5	Hacd3
Alkbh5	0.0015312	-0.304398	0.205	0.323	1	5	Alkbh5
Tacc1	0.00159448	0.251798	0.236	0.125	1	5	Tacc1
Kcnt1	0.00160555	0.257943	0.194	0.094	1	5	Kcnt1
Cd47	0.00162309	0.273658	0.753	0.687	1	5	Cd47
Ostc	0.00162613	-0.321456	0.304	0.421	1	5	Ostc
Sh3bp5	0.00162984	0.304459	0.278	0.155	1	5	Sh3bp5
Lin54	0.00163431	0.26943	0.856	0.805	1	5	Lin54
Snhg5	0.00165994	-0.276252	0.038	0.118	1	5	Snhg5
Ece2	0.00168056	-0.274239	0.369	0.505	1	5	Ece2
Uchl5	0.00168507	0.294428	0.251	0.145	1	5	Uchl5
Macrod2	0.00171142	-0.303041	0.224	0.327	1	5	Macrod2
Anxa6	0.00174524	-0.298928	0.167	0.279	1	5	Anxa6
Dut	0.00176312	-0.267359	0.293	0.418	1	5	Dut
Pde4b	0.00179555	0.350392	0.418	0.313	1	5	Pde4b
Cct7	0.00179891	-0.305102	0.449	0.582	1	5	Cct7
Pygo1	0.00180904	0.253827	0.266	0.148	1	5	Pygo1
Asb1	0.00180989	-0.311708	0.16	0.232	1	5	Asb1
Lrfn5	0.00184338	0.25826	0.433	0.296	1	5	Lrfn5
Ddr1	0.00184543	-0.324292	0.144	0.242	1	5	Ddr1
Rapgefl1	0.0018804	0.287569	0.221	0.114	1	5	Rapgefl1
Mapk3	0.00199436	-0.25578	0.346	0.478	1	5	Mapk3
Shisa4	0.00201162	0.300202	0.319	0.202	1	5	Shisa4
Ngrn	0.00205382	-0.312798	0.289	0.411	1	5	Ngrn
Ufc1	0.00206584	-0.25251	0.323	0.448	1	5	Ufc1
Fam219a	0.00209812	-0.279511	0.559	0.673	1	5	Fam219a
Rnf149	0.00211352	-0.293191	0.312	0.418	1	5	Rnf149
Aldh5a1	0.0021375	-0.267515	0.24	0.357	1	5	Aldh5a1
Fam174a	0.00214391	-0.341345	0.426	0.512	1	5	Fam174a
Gmpr	0.00216549	0.255016	0.247	0.135	1	5	Gmpr
Cbx6	0.0021867	0.277305	0.753	0.69	1	5	Cbx6
Ift80	0.00226662	-0.26434	0.103	0.202	1	5	Ift80
Spr	0.00227132	-0.303782	0.217	0.333	1	5	Spr
Setd3	0.00228553	-0.26093	0.445	0.579	1	5	Setd3
X6030419C18Rik	0.00230998	-0.282623	0.202	0.313	1	5	X6030419C18Rik
Slmo2	0.00231095	-0.355066	0.297	0.364	1	5	Slmo2
Hace1	0.00232738	0.274121	0.202	0.118	1	5	Hace1
Ppp4r1l.ps	0.00233474	-0.279322	0.106	0.209	1	5	Ppp4r1l.ps
Emb	0.00234192	0.272722	0.262	0.145	1	5	Emb
Nsmaf	0.00238239	0.266534	0.171	0.077	1	5	Nsmaf
Rps18	0.00242772	-0.274275	0.426	0.545	1	5	Rps18
Epb41l3	0.00247148	0.331858	0.665	0.589	1	5	Epb41l3
Sort1	0.00249934	0.328234	0.46	0.33	1	5	Sort1
Sdf4	0.00252639	0.303669	0.669	0.549	1	5	Sdf4
Calu	0.00253485	-0.254746	0.148	0.266	1	5	Calu
Fos	0.00255455	-0.701412	0.072	0.141	1	5	Fos
Mgrn1	0.00259793	0.270495	0.43	0.296	1	5	Mgrn1
Cntnap4	0.00269721	0.410878	0.354	0.249	1	5	Cntnap4
Acat2	0.00274919	-0.307851	0.228	0.33	1	5	Acat2
Ift20	0.00282684	0.384902	0.483	0.37	1	5	Ift20
Emc2	0.00282715	-0.296808	0.236	0.323	1	5	Emc2
Dexi	0.00283677	0.298903	0.278	0.175	1	5	Dexi
Klhl29	0.00290266	0.254832	0.202	0.111	1	5	Klhl29
Arrb2	0.00290808	-0.286632	0.179	0.296	1	5	Arrb2
Samd4	0.00299307	0.279941	0.335	0.219	1	5	Samd4
Ctsf	0.0030161	-0.255563	0.202	0.323	1	5	Ctsf
Abcc5	0.00308369	0.302909	0.422	0.306	1	5	Abcc5
Calb1	0.00313262	-0.437236	0.338	0.404	1	5	Calb1
Fads1	0.00316481	-0.303738	0.247	0.37	1	5	Fads1
Snx16	0.00317497	0.337953	0.441	0.31	1	5	Snx16
Bcl2	0.00325339	0.263616	0.133	0.054	1	5	Bcl2
Ncoa7	0.00327248	0.281789	0.357	0.263	1	5	Ncoa7
Srsf6	0.00328672	-0.275657	0.259	0.354	1	5	Srsf6
Pisd	0.00330263	0.26224	0.224	0.125	1	5	Pisd
Cerk	0.00338989	0.275206	0.175	0.084	1	5	Cerk
Snn	0.00359447	0.255724	0.35	0.232	1	5	Snn
Pou3f2	0.00365317	0.270294	0.125	0.057	1	5	Pou3f2
Tomm40	0.00373894	0.277622	0.403	0.296	1	5	Tomm40
Appbp2	0.00374525	0.286683	0.589	0.481	1	5	Appbp2
Hdac5	0.00374953	-0.266824	0.297	0.421	1	5	Hdac5
Nr4a2	0.00377127	-0.393554	0.354	0.431	1	5	Nr4a2
Ankrd17	0.00379635	0.264505	0.494	0.38	1	5	Ankrd17
Grin1	0.00384066	0.255719	0.437	0.32	1	5	Grin1
Gm26682	0.00388847	0.292799	0.255	0.195	1	5	Gm26682
Tac2	0.00403587	-0.362539	0.057	0.128	1	5	Tac2
Pfkm	0.00405128	0.292006	0.49	0.377	1	5	Pfkm
Mgat3	0.00406321	0.262497	0.289	0.199	1	5	Mgat3
Zfr	0.00407242	0.252919	0.646	0.549	1	5	Zfr
Bzw1	0.00418448	0.300289	0.422	0.32	1	5	Bzw1
Grid1	0.0042018	0.26534	0.293	0.189	1	5	Grid1
Rora	0.00423747	0.369936	0.228	0.135	1	5	Rora
Slc24a2	0.00425288	0.285541	0.373	0.256	1	5	Slc24a2
Gm16286	0.00428485	0.307149	0.411	0.3	1	5	Gm16286
Kif3a	0.00429181	0.254535	0.433	0.31	1	5	Kif3a
Sdhd	0.00434045	-0.259592	0.559	0.673	1	5	Sdhd
Mpp1	0.00436674	-0.341512	0.281	0.35	1	5	Mpp1
Gfod1	0.00437962	0.301025	0.156	0.081	1	5	Gfod1
Trmt112	0.00491659	-0.25133	0.243	0.37	1	5	Trmt112
Akt1	0.00492876	-0.272066	0.437	0.535	1	5	Akt1
Lgals3bp	0.00497194	-0.268646	0.084	0.168	1	5	Lgals3bp
Gabarap	0.00511129	-0.273199	0.521	0.623	1	5	Gabarap
Pank3	0.00521432	-0.269729	0.144	0.239	1	5	Pank3
Cyth1	0.0052627	0.319007	0.167	0.088	1	5	Cyth1
Phf3	0.00537182	0.323502	0.251	0.152	1	5	Phf3
Bhlhe41	0.00552536	-0.319888	0.259	0.374	1	5	Bhlhe41
Mrps23	0.0057033	-0.269258	0.259	0.343	1	5	Mrps23
Gse1	0.00578904	0.279838	0.194	0.104	1	5	Gse1
Ppargc1b	0.00586466	-0.255896	0.141	0.229	1	5	Ppargc1b
Pfn1	0.00587082	-0.256232	0.266	0.347	1	5	Pfn1
Eif5b	0.00589457	0.258908	0.449	0.327	1	5	Eif5b
Plxnc1	0.00592958	-0.325251	0.262	0.33	1	5	Plxnc1
Sacm1l	0.00595161	0.263271	0.43	0.323	1	5	Sacm1l
Iqsec1	0.00609217	0.314237	0.388	0.296	1	5	Iqsec1
Cpeb3	0.00613937	0.350515	0.304	0.195	1	5	Cpeb3
Srpk2	0.00626526	0.254172	0.597	0.515	1	5	Srpk2
Galk2	0.00648963	-0.250811	0.16	0.263	1	5	Galk2
Lrba	0.00659544	-0.280193	0.198	0.283	1	5	Lrba
Cdkn1b	0.00672145	-0.271528	0.217	0.296	1	5	Cdkn1b
Cited2	0.00678249	-0.282424	0.369	0.468	1	5	Cited2
Sulf2	0.00683873	-0.297104	0.152	0.246	1	5	Sulf2
Nkiras1	0.00686736	0.265572	0.494	0.438	1	5	Nkiras1
Neo1	0.007139	0.260934	0.247	0.148	1	5	Neo1
Lix1l	0.00719474	-0.277334	0.065	0.141	1	5	Lix1l
Btf3l4	0.00739317	-0.251141	0.342	0.424	1	5	Btf3l4
Nek1	0.00743033	0.350652	0.236	0.158	1	5	Nek1
AW551984	0.00751126	0.323975	0.468	0.387	1	5	AW551984
Tob1	0.00756813	-0.341191	0.129	0.199	1	5	Tob1
Cdh22	0.00757354	-0.294785	0.24	0.343	1	5	Cdh22
Atp2b4	0.00774974	0.258961	0.236	0.148	1	5	Atp2b4
Pfkl	0.00775774	-0.250862	0.293	0.401	1	5	Pfkl
Tspan31	0.00787821	-0.276186	0.175	0.269	1	5	Tspan31
Crmp1	0.00788661	-0.272878	0.513	0.623	1	5	Crmp1
X1110065P20Rik	0.00796943	-0.277692	0.24	0.337	1	5	X1110065P20Rik
Cav2	0.0083482	-0.266395	0.087	0.158	1	5	Cav2
Ehbp1l1	0.00846655	-0.295986	0.137	0.236	1	5	Ehbp1l1
Wipf2	0.00855263	0.257226	0.323	0.219	1	5	Wipf2
Dlx6	0.00879475	0.349521	0.251	0.168	1	5	Dlx6
X1700123O20Rik	0.00880724	-0.263993	0.072	0.148	1	5	X1700123O20Rik
Abce1	0.0088509	-0.25084	0.236	0.296	1	5	Abce1
Slc4a3	0.00893213	0.276499	0.38	0.279	1	5	Slc4a3
Wdr61	0.00893469	-0.257694	0.209	0.296	1	5	Wdr61
Map2k7	0.00923608	-0.282996	0.297	0.38	1	5	Map2k7
Map2k1	0.00934783	0.269005	0.643	0.589	1	5	Map2k1
Arpc2	0.00939341	0.260183	0.529	0.421	1	5	Arpc2
Ttc14	0.00956815	0.330917	0.399	0.303	1	5	Ttc14
Trf	0.00965525	0.286783	0.183	0.101	1	5	Trf
Cdh10	0.00968184	-0.306934	0.278	0.374	1	5	Cdh10
Exoc5	0.0098029	-0.255618	0.316	0.377	1	5	Exoc5
Vps35	0.0101627	-0.251982	0.403	0.492	1	5	Vps35
Snhg8	0.0104651	-0.255138	0.213	0.313	1	5	Snhg8
Me1	0.0105045	-0.253517	0.118	0.205	1	5	Me1
Olfm3	0.0108351	-0.320524	0.202	0.296	1	5	Olfm3
Glrx	0.0109476	0.260506	0.217	0.125	1	5	Glrx
Lsm14a	0.0113634	-0.262688	0.175	0.266	1	5	Lsm14a
Amer2	0.0114094	-0.26283	0.163	0.253	1	5	Amer2
Gm42669	0.0121521	0.259543	0.354	0.293	1	5	Gm42669
Plpp6	0.0124598	0.286435	0.228	0.162	1	5	Plpp6
Cdc73	0.0126231	-0.26901	0.167	0.253	1	5	Cdc73
Tmcc2	0.012651	-0.255385	0.198	0.293	1	5	Tmcc2
Slc9a1	0.0128514	0.264382	0.179	0.125	1	5	Slc9a1
Atg4c	0.0129533	0.267825	0.171	0.101	1	5	Atg4c
Psd3	0.0133751	0.255029	0.498	0.391	1	5	Psd3
Btbd3	0.0135705	-0.260647	0.35	0.451	1	5	Btbd3
Ppp1r37	0.0137127	-0.285385	0.175	0.256	1	5	Ppp1r37
Bms1	0.0138995	0.254383	0.152	0.084	1	5	Bms1
Clock	0.0141003	0.262792	0.445	0.333	1	5	Clock
Atrn	0.0142416	0.386991	0.452	0.364	1	5	Atrn
Tmem128	0.0144961	-0.264938	0.251	0.323	1	5	Tmem128
Extl2	0.0149353	-0.284234	0.399	0.492	1	5	Extl2
Dzip3	0.0151026	0.292454	0.597	0.522	1	5	Dzip3
Arl3	0.0153745	-0.268728	0.369	0.481	1	5	Arl3
Kcnq2	0.0157746	0.258736	0.327	0.226	1	5	Kcnq2
Trak2	0.0174863	0.269432	0.19	0.111	1	5	Trak2
Ocrl	0.0181172	-0.287213	0.266	0.34	1	5	Ocrl
Baz2b	0.019782	0.402247	0.354	0.259	1	5	Baz2b
Sesn1	0.0197917	0.271098	0.141	0.074	1	5	Sesn1
Sphkap	0.0199701	0.315359	0.411	0.306	1	5	Sphkap
Nae1	0.0202713	-0.271516	0.243	0.34	1	5	Nae1
Slc5a3	0.0205988	-0.372764	0.114	0.182	1	5	Slc5a3
Tmem181a	0.0207018	0.33089	0.331	0.239	1	5	Tmem181a
Oat	0.0212887	0.262983	0.414	0.313	1	5	Oat
Srprb	0.0224139	-0.272634	0.289	0.367	1	5	Srprb
Ppp1r7	0.0225003	0.250778	0.251	0.192	1	5	Ppp1r7
Spred1	0.0247098	0.273865	0.259	0.172	1	5	Spred1
Ube4b	0.0255901	-0.292125	0.297	0.377	1	5	Ube4b
Uhrf1bp1l	0.0276848	0.255546	0.449	0.343	1	5	Uhrf1bp1l
Ankrd24	0.0277082	0.278663	0.278	0.185	1	5	Ankrd24
Plppr4	0.0283056	0.315886	0.517	0.448	1	5	Plppr4
Adra1a	0.0283536	-0.283629	0.202	0.283	1	5	Adra1a
Tpst1	0.0285538	-0.297824	0.217	0.3	1	5	Tpst1
Tbccd1	0.0289015	-0.255798	0.065	0.125	1	5	Tbccd1
Tmem263	0.0290618	-0.258702	0.084	0.152	1	5	Tmem263
Ssb	0.029748	-0.266855	0.373	0.458	1	5	Ssb
Mef2a	0.0300851	-0.293892	0.289	0.35	1	5	Mef2a
Wnt4	0.0320676	0.262111	0.209	0.145	1	5	Wnt4
Akap6	0.0346033	0.288185	0.384	0.29	1	5	Akap6
Lrrtm2	0.0382867	0.251018	0.3	0.215	1	5	Lrrtm2
Arfgef3	0.0407977	0.315912	0.479	0.404	1	5	Arfgef3
Rnf6	0.0412589	-0.263185	0.278	0.343	1	5	Rnf6
Foxo3	0.0456795	0.25804	0.118	0.061	1	5	Foxo3
Tmed9	0.0471895	0.270397	0.437	0.354	1	5	Tmed9
Rbfox11	3.27e-15	0.930727	0.723	0.221	8.27e-11	6	Rbfox1
Ppp3ca1	9.77e-13	1.12114	0.899	0.519	2.47e-08	6	Ppp3ca
Hpca1	2.77e-11	0.920527	0.748	0.327	7.02e-07	6	Hpca
Golga3	4.59e-11	0.283438	0.786	0.394	1.16e-06	6	Golga3
Gpd2	5.35e-10	0.480276	0.384	0.058	1.35e-05	6	Gpd2
Ppp3r11	7.08e-10	0.532084	0.925	0.625	1.79e-05	6	Ppp3r1
Enc1	9.64e-10	0.42347	0.805	0.423	2.44e-05	6	Enc1
Rhob1	1.06e-09	0.354929	0.698	0.308	2.68e-05	6	Rhob
Ttf1	1.35e-09	0.339272	0.881	0.529	3.41e-05	6	Ttf1
Celf1	1.92e-09	0.313037	0.654	0.279	4.84e-05	6	Celf1
Prrt21	7.02e-09	0.406532	0.648	0.279	0.000177513	6	Prrt2
Tpd52l11	1.23e-08	0.451651	0.616	0.25	0.000312144	6	Tpd52l1
Sptbn1	1.35e-08	0.261888	0.918	0.615	0.000341755	6	Sptbn1
Blcap	1.51e-08	-0.361051	0.711	0.538	0.000381045	6	Blcap
Sepw1	4.5e-08	0.315188	0.723	0.375	0.00113716	6	Sepw1
Cse1l	4.79e-08	0.379713	0.503	0.173	0.00121021	6	Cse1l
Ngef	6.56e-08	0.322182	0.371	0.087	0.0016599	6	Ngef
Rnf208	6.72e-08	0.415789	0.692	0.337	0.00169867	6	Rnf208
Camk2a1	7.29e-08	0.671892	0.434	0.115	0.00184232	6	Camk2a
Pnck	8.01e-08	0.400744	0.616	0.269	0.00202582	6	Pnck
Hsd17b12	1.09e-07	-0.335429	0.472	0.356	0.00275575	6	Hsd17b12
Rnf1121	1.12e-07	0.264455	0.566	0.25	0.00283689	6	Rnf112
Ensa	1.21e-07	0.270847	0.792	0.462	0.00305326	6	Ensa
Hsph1	1.25e-07	0.386362	0.73	0.385	0.00315929	6	Hsph1
Pfkp1	1.31e-07	-0.256683	0.61	0.423	0.0033076	6	Pfkp
Mecp2	1.62e-07	-0.285697	0.66	0.471	0.00410943	6	Mecp2
Camk2b1	1.89e-07	0.351789	0.925	0.654	0.00478437	6	Camk2b
Ankrd46	2.05e-07	0.28717	0.704	0.375	0.00518908	6	Ankrd46
Calr	2.08e-07	0.358852	0.83	0.51	0.00526417	6	Calr
Nrgn1	2.09e-07	1.31932	0.623	0.288	0.00528586	6	Nrgn
Arhgef9	2.21e-07	0.282085	0.597	0.269	0.00558799	6	Arhgef9
Hcfc1r1	2.42e-07	0.332334	0.66	0.327	0.0061126	6	Hcfc1r1
Wdr82	3.3e-07	0.266492	0.654	0.317	0.00835801	6	Wdr82
Jak1	3.61e-07	0.443764	0.616	0.279	0.00913982	6	Jak1
Ogt	3.82e-07	-0.260865	0.786	0.606	0.00967278	6	Ogt
Idh3g	4.68e-07	-0.29294	0.327	0.192	0.0118318	6	Idh3g
Acsl6	4.88e-07	0.35612	0.541	0.221	0.0123495	6	Acsl6
Fbxw7	5.27e-07	0.328475	0.396	0.115	0.0133234	6	Fbxw7
Syt1	5.35e-07	0.311295	0.912	0.644	0.0135273	6	Syt1
Adgrl3	5.57e-07	0.270811	0.409	0.125	0.0140876	6	Adgrl3
Serpini1	5.72e-07	0.263365	0.553	0.24	0.0144696	6	Serpini1
Hspa4	5.76e-07	-0.313501	0.686	0.529	0.0145761	6	Hspa4
Pdia6	6.01e-07	0.310803	0.553	0.24	0.0151862	6	Pdia6
Cadm1	6.63e-07	-0.607842	0.792	0.731	0.0167696	6	Cadm1
Cdk141	7.21e-07	0.294637	0.61	0.298	0.0182323	6	Cdk14
Gas71	7.79e-07	0.283142	0.239	0.029	0.0196995	6	Gas7
Myt1l1	8.18e-07	0.271352	0.679	0.356	0.0206751	6	Myt1l
Dlx61	9.83e-07	-0.320162	0.314	0.154	0.0248527	6	Dlx6
Rpl31	1.02e-06	0.277975	0.805	0.51	0.0256994	6	Rpl31
Rps17	1.02e-06	0.266948	0.786	0.481	0.0259025	6	Rps17
Gabra21	1.22e-06	0.533702	0.761	0.452	0.0309297	6	Gabra2
Map2k11	1.25e-06	0.356579	0.767	0.452	0.0316462	6	Map2k1
Psma5	1.31e-06	0.326851	0.377	0.106	0.0330028	6	Psma5
Akr1a11	1.34e-06	0.286777	0.792	0.49	0.0339121	6	Akr1a1
Fth1	1.38e-06	0.474288	0.962	0.798	0.0348469	6	Fth1
Lmo41	1.75e-06	0.782911	0.283	0.048	0.0443139	6	Lmo4
Cpeb1	1.75e-06	-0.436961	0.327	0.144	0.0443771	6	Cpeb1
Snca	1.83e-06	0.669783	0.509	0.202	0.0463461	6	Snca
Uqcrb	1.87e-06	-0.423489	0.528	0.404	0.0472916	6	Uqcrb
Akr1b3	1.99e-06	-0.385115	0.371	0.308	0.0503245	6	Akr1b3
Baiap21	2.23e-06	0.36052	0.283	0.058	0.0564543	6	Baiap2
Sar1a	2.31e-06	0.279685	0.503	0.212	0.0584439	6	Sar1a
Napg	2.55e-06	0.318119	0.591	0.279	0.0643694	6	Napg
Adap1	2.6e-06	0.400511	0.314	0.067	0.0658621	6	Adap1
U2af1	2.67e-06	-0.254358	0.434	0.298	0.0675004	6	U2af1
Oxsm	2.68e-06	0.281031	0.453	0.173	0.06766	6	Oxsm
Tomm20	2.68e-06	0.36823	0.881	0.615	0.0677376	6	Tomm20
Slc38a1	2.77e-06	-0.30704	0.648	0.558	0.0700984	6	Slc38a1
Rap2a1	3.07e-06	0.306476	0.346	0.096	0.0777534	6	Rap2a
Eif5a	3.21e-06	0.280624	0.742	0.442	0.0812348	6	Eif5a
Eno2	3.38e-06	0.276842	0.906	0.654	0.0854418	6	Eno2
Syt131	3.47e-06	0.262906	0.648	0.346	0.0877066	6	Syt13
Tcp1	3.78e-06	-0.264337	0.604	0.452	0.0956786	6	Tcp1
Chn11	4.09e-06	0.578994	0.811	0.529	0.103318	6	Chn1
Yaf2	4.21e-06	0.340497	0.472	0.192	0.106472	6	Yaf2
Srpr	4.22e-06	-0.386193	0.333	0.24	0.106802	6	Srpr
Tppp1	4.51e-06	0.330183	0.66	0.356	0.114127	6	Tppp
Srsf11	4.8e-06	0.397324	0.635	0.327	0.121296	6	Srsf1
Ncam11	4.87e-06	-0.322865	0.874	0.75	0.123249	6	Ncam1
Amph	5.04e-06	0.265732	0.635	0.346	0.12753	6	Amph
Tspan5	5.14e-06	0.472956	0.289	0.058	0.129959	6	Tspan5
Eef2	5.54e-06	-0.363055	0.78	0.673	0.140204	6	Eef2
Slc6a11	5.55e-06	0.344619	0.182	0.01	0.140343	6	Slc6a11
Brinp11	5.58e-06	0.352295	0.34	0.096	0.141103	6	Brinp1
BC037034	5.8e-06	0.382686	0.321	0.077	0.146764	6	BC037034
Mrpl53	5.86e-06	0.3111	0.547	0.26	0.148184	6	Mrpl53
Pld31	5.86e-06	-0.260737	0.667	0.51	0.148273	6	Pld3
Casc4	6.33e-06	0.357607	0.591	0.298	0.160101	6	Casc4
Hnrnpul2	6.73e-06	-0.282088	0.667	0.462	0.170123	6	Hnrnpul2
Phf20	6.86e-06	0.266797	0.409	0.154	0.173556	6	Phf20
Zcchc8	7.34e-06	0.28138	0.126	0	0.185728	6	Zcchc8
Nfix	7.34e-06	0.468092	0.126	0	0.185728	6	Nfix
Vbp1	7.46e-06	0.341941	0.528	0.24	0.188642	6	Vbp1
Ncald1	7.81e-06	0.264923	0.799	0.519	0.197485	6	Ncald
Usp8	7.86e-06	-0.276732	0.44	0.298	0.198782	6	Usp8
Sorl1	7.99e-06	0.388739	0.434	0.163	0.201999	6	Sorl1
Hpcal11	8.05e-06	0.283494	0.597	0.317	0.20351	6	Hpcal1
Ywhae	8.09e-06	0.265151	0.969	0.798	0.204653	6	Ywhae
Cdkn2aipnl	8.2e-06	0.283891	0.314	0.087	0.207389	6	Cdkn2aipnl
Nyap1	8.37e-06	0.262454	0.56	0.279	0.211739	6	Nyap1
C1qbp	8.58e-06	0.288292	0.503	0.231	0.216879	6	C1qbp
Tmem59	8.64e-06	-0.302142	0.767	0.625	0.218573	6	Tmem59
Ptk2	9.68e-06	0.281502	0.201	0.019	0.24478	6	Ptk2
Celsr2	1.04e-05	0.27881	0.39	0.144	0.264103	6	Celsr2
Bclaf1	1.07e-05	0.30837	0.528	0.24	0.269557	6	Bclaf1
Cplx2	1.16e-05	0.477994	0.327	0.087	0.292796	6	Cplx2
Ap2a1	1.22e-05	0.250199	0.371	0.125	0.308016	6	Ap2a1
Nnat1	1.26e-05	-0.698833	0.541	0.663	0.319284	6	Nnat
Tmem198	1.3e-05	0.290561	0.22	0.029	0.328851	6	Tmem198
Ubald1	1.42e-05	0.511851	0.447	0.173	0.35805	6	Ubald1
Atg12	1.43e-05	-0.304556	0.39	0.24	0.362771	6	Atg12
Wdr37	1.44e-05	-0.319972	0.384	0.317	0.365072	6	Wdr37
Nudt16l11	1.45e-05	0.288119	0.258	0.048	0.365646	6	Nudt16l1
Stag1	1.48e-05	0.329344	0.289	0.067	0.374874	6	Stag1
Arl31	1.68e-05	0.293398	0.472	0.212	0.425684	6	Arl3
Abi2	1.71e-05	0.267857	0.623	0.346	0.432515	6	Abi2
Galnt1	1.75e-05	-0.370534	0.283	0.202	0.443266	6	Galnt1
Ywhab	1.79e-05	0.251611	0.994	0.894	0.451522	6	Ywhab
Eea1	1.94e-05	-0.367938	0.283	0.173	0.490847	6	Eea1
Jun	2e-05	0.25441	0.358	0.135	0.505099	6	Jun
Plppr41	2.08e-05	0.375403	0.629	0.346	0.526531	6	Plppr4
Cacul1	2.2e-05	0.326224	0.333	0.096	0.557118	6	Cacul1
Abhd12	2.21e-05	0.295115	0.547	0.269	0.558731	6	Abhd12
Abi1	2.23e-05	0.414426	0.39	0.135	0.56431	6	Abi1
Efr3a1	2.48e-05	0.260687	0.66	0.385	0.62697	6	Efr3a
Nup88	2.55e-05	-0.253305	0.333	0.202	0.645427	6	Nup88
Pgbd51	2.56e-05	0.389773	0.352	0.115	0.646961	6	Pgbd5
Alyref	2.56e-05	0.340165	0.296	0.077	0.646971	6	Alyref
Txnl1	2.63e-05	-0.274727	0.465	0.365	0.666262	6	Txnl1
Polr2c	2.82e-05	0.34868	0.528	0.25	0.71358	6	Polr2c
Ncdn1	2.91e-05	0.375135	0.943	0.769	0.736229	6	Ncdn
Tmed8	3.01e-05	0.283448	0.283	0.077	0.761294	6	Tmed8
Mkl21	3.05e-05	0.497439	0.396	0.144	0.771157	6	Mkl2
Cadps21	3.11e-05	0.31721	0.239	0.048	0.786773	6	Cadps2
Wdr471	3.39e-05	0.339048	0.585	0.308	0.85852	6	Wdr47
X5730409E04Rik	3.48e-05	0.271551	0.289	0.087	0.881119	6	X5730409E04Rik
Camk1d1	3.53e-05	0.263613	0.233	0.048	0.893365	6	Camk1d
Fam219a1	3.67e-05	0.29468	0.667	0.394	0.928743	6	Fam219a
Hmgb11	3.9e-05	0.261957	0.717	0.442	0.985994	6	Hmgb1
mt.Nd3	3.91e-05	-0.258514	0.767	0.615	0.988042	6	mt.Nd3
Ptma1	3.97e-05	0.364271	0.761	0.49	1	6	Ptma
Aida	3.99e-05	-0.348231	0.478	0.365	1	6	Aida
Hnrnpm	3.99e-05	-0.266207	0.591	0.462	1	6	Hnrnpm
Cisd2	4.11e-05	-0.319235	0.421	0.279	1	6	Cisd2
Arpc21	4.11e-05	0.253333	0.635	0.365	1	6	Arpc2
Ngb	4.22e-05	0.306601	0.365	0.135	1	6	Ngb
Rcan21	4.32e-05	-0.279048	0.591	0.51	1	6	Rcan2
Dnajc7	4.49e-05	0.27366	0.723	0.452	1	6	Dnajc7
Unc13d	4.51e-05	0.283748	0.742	0.471	1	6	Unc13d
Lgi1	4.6e-05	0.498245	0.377	0.135	1	6	Lgi1
Pdpk1	4.7e-05	-0.256204	0.503	0.346	1	6	Pdpk1
Ak4	4.78e-05	0.358052	0.157	0.01	1	6	Ak4
Senp21	4.95e-05	0.29837	0.453	0.202	1	6	Senp2
Ankra2	5.03e-05	0.386101	0.377	0.135	1	6	Ankra2
Apba11	5.2e-05	-0.311672	0.346	0.26	1	6	Apba1
Arih1	5.39e-05	0.305146	0.396	0.154	1	6	Arih1
Camkk21	5.62e-05	0.336245	0.371	0.135	1	6	Camkk2
Phyh1	5.66e-05	-0.411798	0.434	0.317	1	6	Phyh
Ybx1	5.68e-05	0.398729	0.497	0.231	1	6	Ybx1
Fbxo21	5.9e-05	0.257696	0.484	0.24	1	6	Fbxo21
Ddhd1	6e-05	0.374424	0.176	0.019	1	6	Ddhd1
Slk	6.19e-05	0.353373	0.22	0.038	1	6	Slk
Kalrn1	6.25e-05	0.70716	0.252	0.058	1	6	Kalrn
Bmyc	6.36e-05	0.290822	0.403	0.163	1	6	Bmyc
Ndufs4	6.52e-05	-0.324971	0.377	0.221	1	6	Ndufs4
Ndufa8	6.54e-05	-0.313192	0.34	0.288	1	6	Ndufa8
Lynx11	6.61e-05	-0.369694	0.421	0.298	1	6	Lynx1
Dlg1	6.71e-05	0.3024	0.34	0.125	1	6	Dlg1
Zc2hc1a	6.75e-05	-0.33057	0.384	0.288	1	6	Zc2hc1a
Tceal6	6.84e-05	0.28672	0.478	0.221	1	6	Tceal6
Rufy2	6.87e-05	0.251968	0.377	0.144	1	6	Rufy2
Ppfia2	7.08e-05	0.259794	0.314	0.106	1	6	Ppfia2
Alcam1	7.26e-05	0.407529	0.453	0.202	1	6	Alcam
BC0055371	7.29e-05	-0.270482	0.491	0.404	1	6	BC005537
Rit2	7.3e-05	-0.272278	0.73	0.635	1	6	Rit2
Rpl14	7.44e-05	0.258725	0.774	0.519	1	6	Rpl14
Golga2	7.64e-05	0.266202	0.396	0.163	1	6	Golga2
Slc17a7	7.65e-05	0.464884	0.145	0.01	1	6	Slc17a7
Agpat3	7.76e-05	0.388394	0.535	0.269	1	6	Agpat3
Hnrnpu	8.23e-05	0.297233	0.805	0.558	1	6	Hnrnpu
Zfp207	8.27e-05	0.300229	0.371	0.144	1	6	Zfp207
Nptxr	8.28e-05	-0.339284	0.654	0.538	1	6	Nptxr
Rapgef2	8.64e-05	0.267316	0.333	0.115	1	6	Rapgef2
1951-09-01	9.5e-05	-0.276201	0.679	0.529	1	6	2019-09-05
Ptges3	9.71e-05	0.269453	0.748	0.49	1	6	Ptges3
Tbk1	0.000101195	0.278241	0.302	0.096	1	6	Tbk1
Nebl	0.000102605	0.337574	0.233	0.048	1	6	Nebl
Msh2	0.000106515	-0.370643	0.233	0.096	1	6	Msh2
Sri	0.000107124	-0.250733	0.245	0.115	1	6	Sri
Ebag9	0.000107714	-0.297117	0.157	0.058	1	6	Ebag9
Setd7	0.000108446	0.265299	0.27	0.077	1	6	Setd7
Vmp1	0.0001122	0.43429	0.509	0.25	1	6	Vmp1
Nr3c11	0.000115613	0.383698	0.296	0.087	1	6	Nr3c1
Add1	0.000121855	0.289758	0.572	0.308	1	6	Add1
Cirbp1	0.0001268	0.308726	0.654	0.394	1	6	Cirbp
Tstd3	0.000131873	0.265281	0.17	0.019	1	6	Tstd3
Tmeff21	0.000131971	-0.251103	0.384	0.298	1	6	Tmeff2
Anapc16	0.000132055	0.251031	0.34	0.125	1	6	Anapc16
Sparcl11	0.000133149	0.366338	0.742	0.49	1	6	Sparcl1
Mmadhc	0.000133875	0.276832	0.245	0.058	1	6	Mmadhc
Gda1	0.000136438	0.432148	0.239	0.058	1	6	Gda
Ldb21	0.000138315	0.331485	0.302	0.096	1	6	Ldb2
Serf21	0.000140712	0.310553	0.535	0.279	1	6	Serf2
Klf13	0.00014158	0.363158	0.258	0.067	1	6	Klf13
Arpp211	0.000143037	0.258605	0.478	0.231	1	6	Arpp21
Cacybp1	0.000144108	-0.26196	0.673	0.567	1	6	Cacybp
Dnajc61	0.000147223	0.293685	0.761	0.51	1	6	Dnajc6
Kcnip2	0.000147698	0.334461	0.189	0.029	1	6	Kcnip2
Klhl21	0.000148598	0.413089	0.333	0.115	1	6	Klhl2
Lrp1b	0.000148859	0.284657	0.308	0.106	1	6	Lrp1b
Rltpr	0.00015096	0.30918	0.226	0.048	1	6	Rltpr
Taok3	0.000151133	0.31207	0.428	0.192	1	6	Taok3
Klhdc3	0.000151368	0.302468	0.453	0.212	1	6	Klhdc3
Phf31	0.00016116	-0.25689	0.302	0.173	1	6	Phf3
Nomo11	0.000180453	0.390799	0.491	0.24	1	6	Nomo1
Suds3	0.000185112	0.429728	0.289	0.087	1	6	Suds3
Dohh	0.000192649	0.295694	0.365	0.144	1	6	Dohh
Wdr83os	0.000200005	0.26416	0.403	0.173	1	6	Wdr83os
Ubap2l	0.000200767	0.290577	0.365	0.144	1	6	Ubap2l
Mmp171	0.00020102	0.264389	0.491	0.25	1	6	Mmp17
Rnmt	0.000201069	0.351783	0.409	0.173	1	6	Rnmt
Atic	0.000208385	-0.338548	0.233	0.163	1	6	Atic
Zfp365	0.000208412	0.36882	0.239	0.058	1	6	Zfp365
Rad23b	0.000213074	-0.273614	0.635	0.529	1	6	Rad23b
Lpl1	0.000219244	-0.402088	0.208	0.135	1	6	Lpl
Fbxw2	0.000220854	0.34479	0.421	0.192	1	6	Fbxw2
Tcf7l21	0.000231591	0.508696	0.579	0.327	1	6	Tcf7l2
Shisa41	0.000232178	0.329958	0.409	0.183	1	6	Shisa4
Wasl	0.000234412	0.326511	0.516	0.269	1	6	Wasl
Synpr	0.000235738	0.43772	0.314	0.106	1	6	Synpr
Snrk	0.000236642	0.254561	0.673	0.423	1	6	Snrk
Ntng11	0.000239625	0.538702	0.314	0.106	1	6	Ntng1
Hspd1	0.000245049	-0.313589	0.673	0.567	1	6	Hspd1
Ago1	0.000249444	0.263999	0.346	0.144	1	6	Ago1
Psmb6	0.000250157	0.309757	0.459	0.221	1	6	Psmb6
Wbp4	0.000253227	0.30475	0.459	0.221	1	6	Wbp4
Scarb2	0.000260201	0.252062	0.541	0.298	1	6	Scarb2
Egfr	0.000266095	0.296796	0.283	0.087	1	6	Egfr
Cadm4	0.000266513	0.440962	0.39	0.163	1	6	Cadm4
Degs1	0.000277509	-0.287796	0.358	0.26	1	6	Degs1
Ypel3	0.00027954	0.260841	0.736	0.49	1	6	Ypel3
Rab11a	0.000281376	0.256291	0.56	0.327	1	6	Rab11a
Sema5a1	0.000282711	0.579818	0.409	0.183	1	6	Sema5a
Larp4b	0.000286229	0.395314	0.522	0.279	1	6	Larp4b
Rpl38	0.000286469	0.25909	0.83	0.606	1	6	Rpl38
Rnf7	0.000288796	-0.267694	0.497	0.433	1	6	Rnf7
Tbcb	0.000293868	-0.280993	0.371	0.308	1	6	Tbcb
Pfdn2	0.000310982	-0.436809	0.635	0.51	1	6	Pfdn2
Zbtb181	0.000313379	0.313812	0.296	0.106	1	6	Zbtb18
Rps6ka2	0.000317642	0.272778	0.321	0.115	1	6	Rps6ka2
Mapk14	0.000323331	0.258687	0.157	0.019	1	6	Mapk14
Cdc42	0.000325217	0.309145	0.572	0.327	1	6	Cdc42
Tmem43	0.000346789	0.254379	0.195	0.038	1	6	Tmem43
Zdhhc2	0.000348843	-0.34096	0.321	0.269	1	6	Zdhhc2
Thumpd1	0.000351019	0.257842	0.314	0.115	1	6	Thumpd1
Hnrnpf	0.000352705	0.293166	0.415	0.192	1	6	Hnrnpf
Specc1l	0.000355099	0.327787	0.176	0.029	1	6	Specc1l
Tagln3	0.000362132	-0.34403	0.704	0.577	1	6	Tagln3
Thoc31	0.000362779	-0.320084	0.403	0.269	1	6	Thoc3
Lmo31	0.000363089	0.615746	0.264	0.077	1	6	Lmo3
Tceal3	0.000364685	-0.302428	0.547	0.471	1	6	Tceal3
Rmnd5b	0.000372278	0.265764	0.214	0.048	1	6	Rmnd5b
Nav21	0.000374042	0.266713	0.321	0.125	1	6	Nav2
Stau2	0.000375095	-0.436278	0.384	0.26	1	6	Stau2
Adcy9	0.00037709	0.297316	0.176	0.029	1	6	Adcy9
Gsta4	0.000389157	0.28108	0.245	0.067	1	6	Gsta4
Dirc2	0.000391323	0.389962	0.321	0.115	1	6	Dirc2
Ttyh31	0.000391449	0.378677	0.553	0.308	1	6	Ttyh3
Gabbr2	0.000407901	0.338402	0.572	0.327	1	6	Gabbr2
Ablim2	0.000420175	-0.278945	0.302	0.192	1	6	Ablim2
Zmym4	0.000420259	0.315257	0.34	0.135	1	6	Zmym4
Pum1	0.000420719	-0.25666	0.434	0.346	1	6	Pum1
Apbb2	0.000430447	0.354191	0.384	0.163	1	6	Apbb2
Rab3c1	0.000439487	-0.251372	0.748	0.673	1	6	Rab3c
Slc35e3	0.00045447	0.364251	0.245	0.067	1	6	Slc35e3
Nol3	0.000481328	-0.286603	0.264	0.202	1	6	Nol3
Rnf114	0.000486941	0.26487	0.371	0.163	1	6	Rnf114
Wwc2	0.000500769	-0.343927	0.245	0.125	1	6	Wwc2
Mfsd4a	0.000501956	0.366146	0.453	0.221	1	6	Mfsd4a
Psmd12	0.000503484	-0.38227	0.434	0.317	1	6	Psmd12
Dcaf12l1	0.000511827	-0.287149	0.686	0.587	1	6	Dcaf12l1
Cobl	0.000518444	-0.341563	0.239	0.163	1	6	Cobl
Cdh13	0.000521344	0.357716	0.302	0.106	1	6	Cdh13
Uhmk1	0.000536489	0.290015	0.642	0.404	1	6	Uhmk1
Dip2a	0.000550004	0.26054	0.308	0.115	1	6	Dip2a
Cdk7	0.000550622	0.28763	0.226	0.058	1	6	Cdk7
Usp33	0.000557277	0.270059	0.503	0.269	1	6	Usp33
Sybu	0.00055999	-0.329826	0.327	0.26	1	6	Sybu
Chd6	0.000569907	0.272237	0.44	0.221	1	6	Chd6
Mast4	0.000574982	-0.377039	0.44	0.365	1	6	Mast4
Zfp239	0.000577258	0.270166	0.239	0.067	1	6	Zfp239
Sumo3	0.00058235	0.268866	0.566	0.327	1	6	Sumo3
Slc25a14	0.000584908	-0.295183	0.371	0.25	1	6	Slc25a14
Pcx	0.000609423	0.277672	0.17	0.029	1	6	Pcx
Emd	0.000611608	0.305233	0.352	0.144	1	6	Emd
Rad17	0.000618405	0.251618	0.126	0.01	1	6	Rad17
Dgkz	0.000624283	0.295868	0.384	0.173	1	6	Dgkz
Adcy11	0.000646104	0.731402	0.39	0.173	1	6	Adcy1
Papss1	0.000650885	0.497371	0.27	0.087	1	6	Papss1
Cck1	0.000658014	0.757317	0.283	0.096	1	6	Cck
Amotl1	0.000665228	0.270407	0.371	0.173	1	6	Amotl1
Hdac71	0.000669319	0.29965	0.283	0.096	1	6	Hdac7
Vwc2	0.00067522	0.529033	0.17	0.029	1	6	Vwc2
Garnl3	0.000681135	0.253128	0.491	0.269	1	6	Garnl3
Pls3	0.000683846	0.292073	0.541	0.308	1	6	Pls3
H3f3a1	0.000723	0.279147	0.667	0.433	1	6	H3f3a
Dlg3	0.000749744	0.25822	0.296	0.106	1	6	Dlg3
Gm10636	0.000774916	0.307631	0.252	0.077	1	6	Gm10636
Mrpl51	0.000782029	0.283344	0.321	0.125	1	6	Mrpl51
Slc7a1	0.000787034	0.282771	0.182	0.038	1	6	Slc7a1
Lrrc4b	0.000788616	0.269256	0.572	0.337	1	6	Lrrc4b
Nfib	0.000788735	0.443267	0.138	0.019	1	6	Nfib
Necap1	0.000812445	-0.266578	0.579	0.51	1	6	Necap1
Nfx1	0.000850278	0.331732	0.384	0.173	1	6	Nfx1
Cdkn2d	0.000857545	0.266407	0.484	0.26	1	6	Cdkn2d
Nr2f21	0.000881007	0.382131	0.258	0.087	1	6	Nr2f2
Dgkg1	0.000884972	0.259716	0.327	0.135	1	6	Dgkg
Nefm1	0.000899228	0.260531	0.497	0.279	1	6	Nefm
Kpna4	0.000917134	0.338061	0.321	0.125	1	6	Kpna4
Mapk8	0.000919417	-0.316532	0.415	0.298	1	6	Mapk8
Nme2	0.000935035	0.268874	0.415	0.202	1	6	Nme2
Pank2	0.000955227	0.306777	0.264	0.087	1	6	Pank2
Kndc1	0.000955729	0.266892	0.358	0.154	1	6	Kndc1
Rab9b	0.000959248	0.272619	0.358	0.163	1	6	Rab9b
Rasgrf21	0.000961197	0.33806	0.528	0.298	1	6	Rasgrf2
Pepd	0.000973598	0.254775	0.201	0.048	1	6	Pepd
Blmh	0.000991657	-0.336514	0.371	0.26	1	6	Blmh
Vegfa	0.00102182	-0.332514	0.314	0.231	1	6	Vegfa
Pex3	0.00102212	0.306678	0.164	0.029	1	6	Pex3
Gnptg	0.00102272	0.288988	0.415	0.202	1	6	Gnptg
Gm4631	0.00103715	-0.250795	0.409	0.298	1	6	Gm4631
Ppm1k	0.0010966	0.272789	0.39	0.183	1	6	Ppm1k
Slc39a101	0.00109785	-0.299236	0.522	0.404	1	6	Slc39a10
Bzrap1	0.00110728	0.291755	0.34	0.144	1	6	Bzrap1
Zc3h14	0.00112557	0.444572	0.39	0.192	1	6	Zc3h14
Nudt11	0.00113092	0.311265	0.327	0.135	1	6	Nudt11
Rnf126	0.00113761	0.262733	0.245	0.077	1	6	Rnf126
Mmd1	0.00114678	-0.257675	0.264	0.135	1	6	Mmd
Cacna2d21	0.00115409	-0.286275	0.623	0.548	1	6	Cacna2d2
Abcg4	0.00115417	-0.282562	0.302	0.25	1	6	Abcg4
Dapk1	0.0011607	0.280144	0.415	0.202	1	6	Dapk1
Abhd16a	0.00116419	0.300086	0.503	0.279	1	6	Abhd16a
Mark4	0.00120326	-0.321516	0.264	0.173	1	6	Mark4
Rcan3	0.00120638	-0.300223	0.233	0.135	1	6	Rcan3
Grin2b	0.00120888	0.380854	0.138	0.019	1	6	Grin2b
Plch11	0.00121374	-0.504011	0.214	0.317	1	6	Plch1
Mn1	0.00121664	0.306317	0.214	0.058	1	6	Mn1
Srm	0.00123897	0.258941	0.226	0.067	1	6	Srm
Golga71	0.00128104	0.370418	0.302	0.115	1	6	Golga7
B230219D22Rik	0.00128583	-0.252641	0.358	0.269	1	6	B230219D22Rik
Frmd5	0.0012989	0.283187	0.195	0.048	1	6	Frmd5
Kif1a	0.00134814	-0.365159	0.836	0.779	1	6	Kif1a
Ubfd1	0.00135667	0.305892	0.509	0.288	1	6	Ubfd1
Arhgap21	0.00135943	0.37247	0.258	0.087	1	6	Arhgap21
P4hb	0.00136263	-0.353798	0.352	0.269	1	6	P4hb
Usp30	0.00145771	0.281034	0.157	0.029	1	6	Usp30
Tomm34	0.00146134	0.381363	0.421	0.212	1	6	Tomm34
Pigk	0.0014734	-0.262113	0.258	0.192	1	6	Pigk
Syndig1l1	0.00150563	0.369588	0.264	0.096	1	6	Syndig1l
Tiprl	0.00158008	-0.389302	0.296	0.212	1	6	Tiprl
Bola2	0.00159064	0.339299	0.226	0.067	1	6	Bola2
Shox21	0.00161128	0.28794	0.409	0.212	1	6	Shox2
Hrk	0.00162441	0.282137	0.151	0.029	1	6	Hrk
Ehd3	0.0016325	0.281695	0.333	0.144	1	6	Ehd3
Bcl11b1	0.00166791	0.37544	0.107	0.01	1	6	Bcl11b
Fn1	0.00167646	0.265619	0.157	0.029	1	6	Fn1
Slc25a28	0.00171097	0.250288	0.17	0.038	1	6	Slc25a28
Tada1	0.00172538	0.260983	0.264	0.096	1	6	Tada1
Mrpl3	0.00183227	-0.275471	0.346	0.279	1	6	Mrpl3
Drg1	0.00185209	0.27341	0.358	0.163	1	6	Drg1
Mark1	0.00185428	0.301141	0.346	0.154	1	6	Mark1
Chd3os1	0.00191136	-0.257323	0.755	0.654	1	6	Chd3os
Opcml1	0.00194872	0.266522	0.478	0.269	1	6	Opcml
Fdps	0.00197801	-0.296692	0.176	0.115	1	6	Fdps
Rbm17	0.00199829	-0.454628	0.27	0.183	1	6	Rbm17
Ccdc50	0.00200236	0.36996	0.346	0.154	1	6	Ccdc50
Ppp1r21	0.002019	0.370659	0.333	0.144	1	6	Ppp1r21
Ebf3	0.00204153	0.406877	0.132	0.019	1	6	Ebf3
Elmo11	0.00207188	0.268479	0.522	0.308	1	6	Elmo1
Eif3h	0.00211408	-0.363525	0.667	0.567	1	6	Eif3h
Lrrc7	0.00212581	-0.258615	0.214	0.135	1	6	Lrrc7
Ptprg1	0.00213882	0.252463	0.258	0.096	1	6	Ptprg
Ranbp9	0.00214258	0.311744	0.365	0.173	1	6	Ranbp9
Myo5a1	0.00219108	-0.293146	0.233	0.183	1	6	Myo5a
Atg13	0.00219225	0.280372	0.314	0.135	1	6	Atg13
Cluh	0.00227353	0.298062	0.365	0.173	1	6	Cluh
Ipo7	0.0022821	0.307293	0.415	0.212	1	6	Ipo7
Tmed91	0.00229982	-0.317631	0.472	0.385	1	6	Tmed9
X6330403A02Rik1	0.00235039	0.444503	0.264	0.096	1	6	X6330403A02Rik
Magi2	0.00237292	0.287797	0.277	0.106	1	6	Magi2
Git2	0.002417	-0.265567	0.214	0.106	1	6	Git2
A830010M20Rik	0.00247111	0.28193	0.302	0.125	1	6	A830010M20Rik
Rcl1	0.00249003	0.279119	0.17	0.038	1	6	Rcl1
Gpm6b	0.00254107	0.281908	0.377	0.183	1	6	Gpm6b
Fbxl4	0.00257592	-0.292546	0.157	0.096	1	6	Fbxl4
Parm11	0.00257908	-0.576243	0.164	0.269	1	6	Parm1
Dnajb9	0.00260269	-0.294051	0.377	0.269	1	6	Dnajb9
Rgs16	0.00261422	0.261594	0.151	0.029	1	6	Rgs16
Ccni	0.00272353	0.262494	0.352	0.163	1	6	Ccni
Car10	0.00277484	0.319282	0.365	0.173	1	6	Car10
Slc5a31	0.00303127	0.266191	0.164	0.038	1	6	Slc5a3
Crtac1	0.00314011	0.282799	0.145	0.029	1	6	Crtac1
Fam131a	0.00316635	0.528336	0.346	0.163	1	6	Fam131a
Ptk2b	0.00323342	0.828379	0.119	0.019	1	6	Ptk2b
Trmt6	0.00324654	0.281474	0.182	0.048	1	6	Trmt6
Ergic2	0.00329564	-0.350676	0.27	0.192	1	6	Ergic2
Lrrc57	0.00329739	0.251119	0.126	0.019	1	6	Lrrc57
Dnajc8	0.00330625	-0.429891	0.591	0.423	1	6	Dnajc8
Tmsb4x1	0.0033506	0.279217	0.969	0.894	1	6	Tmsb4x
Nptx11	0.00335824	0.420583	0.189	0.058	1	6	Nptx1
Ncbp1	0.00335866	0.364054	0.214	0.067	1	6	Ncbp1
X2010300C02Rik1	0.00339112	0.561232	0.214	0.067	1	6	X2010300C02Rik
Plk51	0.00341302	0.343085	0.182	0.048	1	6	Plk5
Lrp12	0.00347013	0.31475	0.214	0.067	1	6	Lrp12
Ctxn1	0.00352676	0.366586	0.321	0.144	1	6	Ctxn1
Mag	0.0035986	0.557399	0.126	0.019	1	6	Mag
Wdr11	0.00361443	-0.324574	0.17	0.106	1	6	Wdr11
St7l	0.00364377	0.316318	0.126	0.019	1	6	St7l
Dctn6	0.00369369	0.289754	0.44	0.24	1	6	Dctn6
Iqsec2	0.00392421	-0.267773	0.195	0.135	1	6	Iqsec2
Vps4b	0.00403627	0.315099	0.321	0.144	1	6	Vps4b
Fam195b	0.0040676	0.262627	0.302	0.135	1	6	Fam195b
Shtn1	0.00414158	-0.415956	0.164	0.221	1	6	Shtn1
Slc39a6	0.00422052	0.306052	0.377	0.192	1	6	Slc39a6
Arhgef4	0.00438378	0.394921	0.34	0.163	1	6	Arhgef4
Nr1d1	0.00453452	0.284673	0.189	0.058	1	6	Nr1d1
Ddx54	0.00465105	-0.468051	0.101	0.048	1	6	Ddx54
Gabra4	0.00472737	0.312231	0.208	0.067	1	6	Gabra4
Rnf215	0.00489254	-0.349655	0.201	0.144	1	6	Rnf215
Arhgef31	0.00490689	0.283697	0.176	0.048	1	6	Arhgef3
Ptcd3	0.00500225	-0.295718	0.277	0.221	1	6	Ptcd3
Elavl1	0.00508739	0.256972	0.314	0.144	1	6	Elavl1
Jmjd6	0.00510193	-0.435492	0.107	0.183	1	6	Jmjd6
Basp11	0.00511768	0.26935	0.937	0.856	1	6	Basp1
Cabp7	0.00519936	0.26816	0.22	0.077	1	6	Cabp7
Fam179b	0.00520313	-0.300145	0.208	0.135	1	6	Fam179b
Abce11	0.00531079	0.277874	0.302	0.135	1	6	Abce1
Pdcd6	0.00532351	0.26477	0.289	0.125	1	6	Pdcd6
Bace1	0.00539502	0.33533	0.34	0.163	1	6	Bace1
Angel2	0.00563247	-0.307705	0.34	0.25	1	6	Angel2
Slc39a7	0.00563737	-0.615098	0.245	0.192	1	6	Slc39a7
Erc21	0.00565303	0.350716	0.302	0.135	1	6	Erc2
Frs3	0.00594528	-0.251258	0.421	0.337	1	6	Frs3
Sgce	0.00625127	0.298901	0.233	0.087	1	6	Sgce
Yeats4	0.00666436	-0.290189	0.321	0.26	1	6	Yeats4
Nacc2	0.00673548	0.288773	0.447	0.26	1	6	Nacc2
Kcmf1	0.00684319	-0.282766	0.27	0.183	1	6	Kcmf1
Sall2	0.00698936	0.298223	0.258	0.106	1	6	Sall2
Snrpf	0.00721211	0.338731	0.358	0.183	1	6	Snrpf
Nav11	0.00738422	0.336926	0.27	0.115	1	6	Nav1
Tspan21	0.00742361	0.268752	0.27	0.115	1	6	Tspan2
Wbscr17	0.00748528	0.309924	0.17	0.048	1	6	Wbscr17
Kcnh7	0.00768879	0.332823	0.308	0.144	1	6	Kcnh7
Mast3	0.00798883	0.389317	0.182	0.058	1	6	Mast3
Tshz1	0.00801107	0.309021	0.182	0.058	1	6	Tshz1
Kitl1	0.00829912	-0.445168	0.415	0.548	1	6	Kitl
Sec23ip	0.00833713	0.341498	0.214	0.077	1	6	Sec23ip
Foxj2	0.00839716	0.29293	0.151	0.038	1	6	Foxj2
Vps33a	0.00844936	0.253245	0.214	0.077	1	6	Vps33a
Actr3b	0.00877771	0.309057	0.233	0.096	1	6	Actr3b
Cnksr2	0.00887511	0.265037	0.132	0.029	1	6	Cnksr2
Zfp467	0.0090209	0.290724	0.201	0.077	1	6	Zfp467
Umad1	0.00936841	-0.270636	0.409	0.327	1	6	Umad1
Herpud2	0.00946061	-0.433895	0.22	0.154	1	6	Herpud2
Spns21	0.00967373	0.303301	0.195	0.067	1	6	Spns2
Paqr81	0.00972779	-0.40515	0.214	0.308	1	6	Paqr8
Mxd4	0.00974387	0.270961	0.239	0.096	1	6	Mxd4
Ppp1r13b	0.00993378	0.264493	0.252	0.106	1	6	Ppp1r13b
Tmem191c	0.0101366	0.283805	0.314	0.154	1	6	Tmem191c
Pnma2	0.0101937	0.287989	0.302	0.144	1	6	Pnma2
Erlin2	0.010197	-0.25306	0.277	0.212	1	6	Erlin2
Dnajc19	0.010251	0.294954	0.34	0.173	1	6	Dnajc19
Kars	0.0106241	0.290859	0.277	0.125	1	6	Kars
Adgrl21	0.0107343	-0.316939	0.208	0.135	1	6	Adgrl2
Erbb41	0.0111194	0.259692	0.164	0.048	1	6	Erbb4
Spock1	0.0115931	0.428658	0.233	0.096	1	6	Spock1
Pitpnm3	0.0116676	0.252003	0.358	0.192	1	6	Pitpnm3
Glo1	0.0117866	0.261512	0.371	0.202	1	6	Glo1
Pi4ka	0.0119433	-0.273402	0.478	0.423	1	6	Pi4ka
Gng7	0.0121543	0.26169	0.107	0.019	1	6	Gng7
Anxa61	0.0124105	0.266134	0.22	0.087	1	6	Anxa6
Slc1a4	0.0127753	0.263345	0.22	0.087	1	6	Slc1a4
Polr1d	0.0128697	0.293467	0.409	0.24	1	6	Polr1d
Mrps14	0.013166	-0.340621	0.459	0.375	1	6	Mrps14
Tanc11	0.0132393	0.266651	0.403	0.231	1	6	Tanc1
X2700097O09Rik	0.0138348	-0.317651	0.233	0.183	1	6	X2700097O09Rik
Stmn4	0.0142972	-0.326402	0.604	0.529	1	6	Stmn4
Mtmr3	0.0148386	0.312321	0.308	0.154	1	6	Mtmr3
Grem21	0.0151213	-0.314619	0.226	0.144	1	6	Grem2
Ppp1r1a	0.0157853	0.387946	0.226	0.096	1	6	Ppp1r1a
Pim2	0.0159136	-0.285165	0.264	0.212	1	6	Pim2
Rev1	0.0162893	-0.308049	0.182	0.125	1	6	Rev1
Tmem70	0.0169804	0.31112	0.302	0.154	1	6	Tmem70
Ssh3	0.0180295	0.282772	0.214	0.087	1	6	Ssh3
Fam163b1	0.0182619	0.377858	0.182	0.067	1	6	Fam163b
Egr1	0.0184074	0.257454	0.17	0.067	1	6	Egr1
Pwwp2a	0.0188784	0.267716	0.226	0.096	1	6	Pwwp2a
Ddn	0.0193835	0.331037	0.101	0.019	1	6	Ddn
Grin3a1	0.0197695	0.256628	0.302	0.154	1	6	Grin3a
Slit1	0.0205211	0.254949	0.119	0.029	1	6	Slit1
Dkk31	0.0206064	0.33374	0.151	0.048	1	6	Dkk3
Cdo1	0.0210358	0.294486	0.151	0.048	1	6	Cdo1
Bex2	0.0223789	-0.277632	0.597	0.538	1	6	Bex2
Pou4f11	0.0232885	-0.510064	0.201	0.308	1	6	Pou4f1
Plp1	0.0243252	0.989744	0.245	0.115	1	6	Plp1
Ankrd45	0.024763	0.277604	0.126	0.038	1	6	Ankrd45
Clpp	0.0249958	-0.350717	0.126	0.202	1	6	Clpp
Ppp1r16b	0.026045	0.306826	0.176	0.067	1	6	Ppp1r16b
Tcf41	0.0261797	0.254531	0.591	0.423	1	6	Tcf4
Golph3	0.0262178	-0.2599	0.264	0.212	1	6	Golph3
Fam65b	0.0263052	0.440159	0.22	0.096	1	6	Fam65b
Pip5k1c	0.0268337	0.259724	0.296	0.154	1	6	Pip5k1c
Ppm1l	0.0273886	0.324305	0.283	0.144	1	6	Ppm1l
Tpx2	0.0279878	-0.28417	0.113	0.183	1	6	Tpx2
Irgq	0.029531	0.284434	0.308	0.173	1	6	Irgq
Rnf150	0.0298488	0.261298	0.176	0.067	1	6	Rnf150
Sptbn2	0.03166	0.287342	0.302	0.163	1	6	Sptbn2
Epha41	0.0339758	0.366055	0.214	0.096	1	6	Epha4
Atf6	0.0393047	0.34545	0.126	0.038	1	6	Atf6
Sst1	0.0400881	0.313408	0.119	0.038	1	6	Sst
Sncg1	0.0442802	-0.400616	0.151	0.25	1	6	Sncg
Htr2c1	0.0448929	0.326122	0.352	0.212	1	6	Htr2c
Nfkb1	0.0468975	0.271084	0.138	0.048	1	6	Nfkb1
Mcl1	0.0485492	0.254698	0.208	0.096	1	6	Mcl1
Nap1l51	6.71e-46	1.73428	0.939	0.491	1.7e-41	7	Nap1l5
Rab27b1	5.35e-35	-1.49134	0.32	0.905	1.35e-30	7	Rab27b
Parm12	7.97e-25	1.34965	0.691	0.138	2.01e-20	7	Parm1
Bcl11b2	1.16e-23	-1.17599	0.072	0.603	2.94e-19	7	Bcl11b
Nr4a22	7.77e-23	1.60856	0.63	0.121	1.97e-18	7	Nr4a2
Pde2a1	1.69e-22	-1.16299	0.514	0.871	4.28e-18	7	Pde2a
Rap1gap1	8.27e-22	-1.02622	0.552	0.879	2.09e-17	7	Rap1gap
Gap431	1.15e-20	1.09361	0.834	0.397	2.91e-16	7	Gap43
Chrnb31	1.17e-20	-1.00405	0.088	0.595	2.95e-16	7	Chrnb3
Calb11	1.81e-20	1.61999	0.58	0.129	4.59e-16	7	Calb1
Syt91	1.95e-19	-0.878598	0.536	0.905	4.94e-15	7	Syt9
Kcng41	4.27e-19	-1.14918	0.077	0.543	1.08e-14	7	Kcng4
Mab21l21	7.35e-19	-0.948331	0.033	0.457	1.86e-14	7	Mab21l2
Pcp4	9e-19	2.164	0.525	0.121	2.28e-14	7	Pcp4
X1810041L15Rik1	7.4e-18	-0.732246	0.807	0.948	1.87e-13	7	X1810041L15Rik
Th1	8.56e-18	-1.00813	0.066	0.509	2.16e-13	7	Th
Nptx12	9.8e-18	-0.975199	0.232	0.716	2.48e-13	7	Nptx1
Cartpt1	1.06e-17	-0.764211	0.508	0.905	2.69e-13	7	Cartpt
X4833423E24Rik1	1.2e-17	-2.02177	0.006	0.345	3.04e-13	7	X4833423E24Rik
Tmem255a1	1.73e-17	1.17041	0.796	0.457	4.37e-13	7	Tmem255a
Rspo31	2.31e-17	-0.78695	0.149	0.638	5.84e-13	7	Rspo3
Cdh131	2.18e-15	1.02078	0.376	0.017	5.51e-11	7	Cdh13
Ano11	5.35e-15	-0.85894	0.083	0.491	1.35e-10	7	Ano1
Otx21	1.71e-14	-0.818085	0.017	0.336	4.32e-10	7	Otx2
Cbln11	4.55e-14	-0.550295	0.249	0.698	1.15e-09	7	Cbln1
Peg101	6.43e-14	1.07484	0.331	0.009	1.63e-09	7	Peg10
Sncg2	9.76e-14	-0.676317	0.669	0.871	2.47e-09	7	Sncg
Ebf11	1.34e-13	-0.74064	0.199	0.638	3.39e-09	7	Ebf1
Pcdh101	1.36e-13	1.07563	0.354	0.026	3.43e-09	7	Pcdh10
Sphkap1	1.38e-13	1.07785	0.448	0.086	3.49e-09	7	Sphkap
Nell11	2.92e-13	0.715326	0.271	0	7.39e-09	7	Nell1
Tmem1581	4.76e-13	-0.81453	0.265	0.69	1.2e-08	7	Tmem158
Aqp61	4.9e-13	-0.681738	0.017	0.31	1.24e-08	7	Aqp6
Tmeff22	5.54e-13	0.716782	0.315	0.009	1.4e-08	7	Tmeff2
Sparcl12	8.71e-13	-1.14903	0.11	0.5	2.2e-08	7	Sparcl1
Nnat2	1.55e-12	-0.506817	0.901	0.966	3.91e-08	7	Nnat
Nr4a31	1.71e-12	-0.711797	0.32	0.741	4.32e-08	7	Nr4a3
Nrp21	3.22e-12	-0.779342	0.32	0.724	8.14e-08	7	Nrp2
Kcnmb41	1.51e-11	0.780798	0.79	0.5	3.82e-07	7	Kcnmb4
Slc17a71	1.6e-11	-0.639425	0.061	0.388	4.04e-07	7	Slc17a7
Celf2	2.02e-11	-0.667459	0.674	0.905	5.11e-07	7	Celf2
Rcan22	2.6e-11	-0.719392	0.663	0.879	6.57e-07	7	Rcan2
Foxp21	2.91e-11	0.88516	0.398	0.078	7.35e-07	7	Foxp2
Wif11	4.53e-11	1.10116	0.293	0.017	1.15e-06	7	Wif1
Nxph41	4.64e-11	-0.895433	0.138	0.483	1.17e-06	7	Nxph4
Pbx31	6.64e-11	0.844779	0.508	0.25	1.68e-06	7	Pbx3
Syt132	9.36e-11	-0.622034	0.575	0.871	2.37e-06	7	Syt13
Cadps22	1.22e-10	-0.760544	0.403	0.759	3.09e-06	7	Cadps2
Mab21l11	1.93e-10	-0.624384	0.077	0.397	4.89e-06	7	Mab21l1
Mfge81	2.33e-10	-0.522943	0.022	0.276	5.89e-06	7	Mfge8
Gabrb11	2.98e-10	0.706815	0.282	0.017	7.55e-06	7	Gabrb1
Kcnma11	3.68e-10	-0.886413	0.536	0.733	9.3e-06	7	Kcnma1
Nfix1	4.79e-10	-0.490395	0.006	0.216	1.21e-05	7	Nfix
Cxx1a	5.86e-10	0.623066	0.912	0.75	1.48e-05	7	Cxx1a
Calb21	5.94e-10	1.21221	0.475	0.172	1.5e-05	7	Calb2
Gucy1a31	6.84e-10	-0.727405	0.392	0.741	1.73e-05	7	Gucy1a3
Rprm1	7.34e-10	0.904157	0.365	0.069	1.86e-05	7	Rprm
Meg3	1.11e-09	0.447082	1	0.94	2.81e-05	7	Meg3
Kctd121	1.29e-09	-0.51387	0.215	0.578	3.26e-05	7	Kctd12
Cpne91	1.35e-09	-0.857322	0.171	0.483	3.4e-05	7	Cpne9
Plxnc11	2.06e-09	0.916391	0.431	0.172	5.22e-05	7	Plxnc1
Zmat4	2.16e-09	-0.626193	0.033	0.284	5.47e-05	7	Zmat4
Srgap31	2.21e-09	0.675824	0.331	0.052	5.58e-05	7	Srgap3
Pcdh91	2.88e-09	-0.560394	0.403	0.767	7.29e-05	7	Pcdh9
Slc24a31	2.95e-09	0.502675	0.188	0	7.47e-05	7	Slc24a3
Zfhx31	2.95e-09	0.794311	0.315	0.043	7.47e-05	7	Zfhx3
Syt11	4.25e-09	0.61657	0.884	0.784	0.00010759	7	Syt1
Espn	4.58e-09	-0.320307	0	0.155	0.000115929	7	Espn
Pld51	5.1e-09	-0.61234	0.171	0.509	0.000128897	7	Pld5
Vwc21	5.27e-09	0.660184	0.254	0.017	0.000133381	7	Vwc2
Cntnap21	5.88e-09	-0.511949	0.785	0.845	0.000148722	7	Cntnap2
Pou6f21	1.08e-08	-0.481773	0.094	0.388	0.00027214	7	Pou6f2
Trpc41	1.27e-08	0.584951	0.32	0.052	0.000321628	7	Trpc4
Kcnab2	1.96e-08	-0.592384	0.149	0.466	0.000495509	7	Kcnab2
Homer2	2.04e-08	-0.488595	0.077	0.353	0.000516599	7	Homer2
Enpp5	2.55e-08	0.590962	0.58	0.379	0.000644158	7	Enpp5
Chl11	4.96e-08	0.656722	0.32	0.06	0.00125521	7	Chl1
Tenm11	5.52e-08	0.569919	0.309	0.052	0.00139569	7	Tenm1
Tub1	5.57e-08	0.581034	0.591	0.397	0.00140979	7	Tub
Hpca2	5.77e-08	-0.591729	0.055	0.302	0.00145819	7	Hpca
Scg3	7.35e-08	0.650289	0.646	0.397	0.00185915	7	Scg3
Lhx91	7.47e-08	0.579405	0.762	0.638	0.00188894	7	Lhx9
Gabra11	9.87e-08	0.394449	0.155	0	0.00249687	7	Gabra1
Disp21	1.39e-07	0.57768	0.729	0.56	0.00350519	7	Disp2
Gabra22	1.41e-07	0.675568	0.459	0.164	0.00355931	7	Gabra2
Kcnip41	2.02e-07	0.662046	0.448	0.164	0.00511587	7	Kcnip4
Aebp1	2.18e-07	-0.368542	0.022	0.216	0.00550049	7	Aebp1
Necab22	2.32e-07	0.447288	0.934	0.828	0.00586374	7	Necab2
Hs6st21	2.66e-07	-0.555259	0.453	0.733	0.00673307	7	Hs6st2
Cadps1	2.72e-07	0.678373	0.376	0.129	0.00687358	7	Cadps
Cables11	3.43e-07	-0.58452	0.144	0.422	0.0086721	7	Cables1
Tunar	5.14e-07	-0.544172	0.022	0.198	0.0130024	7	Tunar
Gng21	5.96e-07	0.633074	0.365	0.121	0.0150803	7	Gng2
Lsp1	6e-07	-0.33785	0.006	0.155	0.015177	7	Lsp1
Phactr21	6.02e-07	-0.369204	0.155	0.431	0.0152229	7	Phactr2
Phactr3	6.4e-07	-0.458226	0.105	0.362	0.0161963	7	Phactr3
Negr1	7.18e-07	0.492343	0.729	0.466	0.018163	7	Negr1
Necab3	7.21e-07	-0.543992	0.122	0.388	0.0182308	7	Necab3
Cav21	9.16e-07	0.59682	0.238	0.034	0.0231579	7	Cav2
Adgrl22	9.77e-07	0.341698	0.133	0	0.0247022	7	Adgrl2
Slitrk1	9.77e-07	0.334633	0.133	0	0.0247022	7	Slitrk1
Spock31	1.03e-06	0.463075	0.199	0.017	0.0260177	7	Spock3
Tcaf1	1.04e-06	-0.497943	0.729	0.828	0.026256	7	Tcaf1
Btbd111	1.26e-06	-0.602984	0.276	0.552	0.0318814	7	Btbd11
Necab11	1.29e-06	-0.388165	0.05	0.259	0.0326305	7	Necab1
Cygb	1.45e-06	0.629619	0.762	0.586	0.0365659	7	Cygb
Creg21	1.66e-06	0.438137	0.171	0.009	0.0419866	7	Creg2
Elavl21	1.81e-06	-0.478618	0.227	0.517	0.0457285	7	Elavl2
Sipa1l2	1.86e-06	-0.545702	0.221	0.509	0.04713	7	Sipa1l2
Pcdh171	1.93e-06	0.502033	0.215	0.026	0.048825	7	Pcdh17
Asic1	2.08e-06	-0.507101	0.215	0.5	0.052658	7	Asic1
Zic3	2.19e-06	-0.27939	0.061	0.267	0.0553652	7	Zic3
Gpd1	2.3e-06	-0.397256	0.028	0.207	0.0580844	7	Gpd1
Gucy1b31	3e-06	-0.627254	0.508	0.741	0.0759883	7	Gucy1b3
Olfm31	3.01e-06	-0.73174	0.199	0.448	0.076083	7	Olfm3
Serpine21	3.07e-06	-0.530297	0.11	0.353	0.0777183	7	Serpine2
Rasgrp2	3.07e-06	-0.452241	0.028	0.198	0.0777529	7	Rasgrp2
Brinp12	3.12e-06	-0.700391	0.254	0.526	0.07896	7	Brinp1
Racgap11	3.13e-06	-0.363132	0.188	0.457	0.0790873	7	Racgap1
Rasgrp1	3.19e-06	-0.479185	0.094	0.328	0.080707	7	Rasgrp1
Kiss1r1	4.97e-06	-0.397975	0.149	0.405	0.125674	7	Kiss1r
Dscam1	5e-06	0.395263	0.232	0.043	0.126477	7	Dscam
Tcf42	5.25e-06	-0.389346	0.138	0.388	0.132851	7	Tcf4
Postn	5.33e-06	0.641908	0.116	0	0.134757	7	Postn
Lingo21	5.33e-06	0.252864	0.116	0	0.134757	7	Lingo2
Dgkz1	5.5e-06	-0.357062	0.249	0.526	0.139159	7	Dgkz
Pcp4l11	5.56e-06	-0.670358	0.028	0.198	0.140488	7	Pcp4l1
Rnd2	6.25e-06	0.523744	0.497	0.25	0.158031	7	Rnd2
Vstm2a	7.71e-06	0.522399	0.53	0.267	0.194977	7	Vstm2a
Otx1	8.08e-06	-0.346244	0.022	0.181	0.204399	7	Otx1
Lrrc49	8.91e-06	0.589696	0.359	0.216	0.225248	7	Lrrc49
Lrba1	1.01e-05	-0.486617	0.182	0.44	0.254238	7	Lrba
Myo1b1	1.04e-05	-0.31466	0.16	0.397	0.262812	7	Myo1b
Htr5b1	1.13e-05	0.576779	0.315	0.095	0.286073	7	Htr5b
Atp1a11	1.22e-05	-0.446099	0.796	0.888	0.307548	7	Atp1a1
Calm11	1.22e-05	0.423155	0.906	0.759	0.309394	7	Calm1
Fam101b	1.26e-05	0.463333	0.155	0.009	0.319775	7	Fam101b
Alcam2	1.31e-05	0.367444	0.492	0.552	0.331513	7	Alcam
Slc7a81	1.34e-05	-0.509616	0.16	0.405	0.338236	7	Slc7a8
Wbscr271	1.4e-05	-0.352374	0.099	0.319	0.354808	7	Wbscr27
Syt17	1.47e-05	0.358697	0.409	0.164	0.372443	7	Syt17
Rpl311	1.53e-05	0.379475	0.851	0.707	0.386517	7	Rpl31
Sox11	1.64e-05	0.251171	0.105	0	0.4137	7	Sox1
Cacna1e	1.69e-05	-0.317551	0.398	0.672	0.426753	7	Cacna1e
Glra2	1.72e-05	0.434528	0.149	0.009	0.434676	7	Glra2
Fam219a2	1.93e-05	-0.374266	0.58	0.819	0.489262	7	Fam219a
Aes	2.01e-05	-0.465823	0.751	0.862	0.509244	7	Aes
Arl4c	2.03e-05	0.436139	0.547	0.284	0.512797	7	Arl4c
Epb41l4a	2.18e-05	-0.292691	0.133	0.353	0.550124	7	Epb41l4a
Gpr1391	2.22e-05	-0.482685	0.425	0.672	0.562151	7	Gpr139
Kank4	2.37e-05	-0.409362	0.039	0.207	0.598587	7	Kank4
Syt61	2.44e-05	-0.446151	0.475	0.733	0.618265	7	Syt6
Csnk1e	2.7e-05	-0.557184	0.403	0.655	0.681729	7	Csnk1e
Chst101	2.75e-05	-0.434588	0.536	0.767	0.695203	7	Chst10
Wls	2.82e-05	-0.509865	0.243	0.483	0.712562	7	Wls
Clstn1	2.89e-05	0.386291	0.89	0.836	0.731532	7	Clstn1
Rpl30	3.14e-05	0.438482	0.785	0.664	0.794429	7	Rpl30
Gm138891	3.25e-05	-0.565962	0.155	0.379	0.821774	7	Gm13889
Prokr21	3.33e-05	0.492521	0.166	0.026	0.841899	7	Prokr2
Pbx11	3.37e-05	0.427028	0.906	0.828	0.85218	7	Pbx1
Gng81	3.51e-05	-0.383072	0.718	0.888	0.887043	7	Gng8
Gria41	3.65e-05	-0.400804	0.398	0.664	0.923309	7	Gria4
Aifm31	3.75e-05	-0.533059	0.37	0.612	0.948357	7	Aifm3
Elmo2	4.04e-05	-0.385443	0.227	0.474	1	7	Elmo2
Rps8	4.54e-05	0.348126	0.901	0.828	1	7	Rps8
Txn21	4.54e-05	-0.434948	0.475	0.733	1	7	Txn2
Nek71	4.74e-05	0.432989	0.84	0.716	1	7	Nek7
Cplx21	4.96e-05	0.545307	0.359	0.198	1	7	Cplx2
Amph1	5.02e-05	0.424436	0.558	0.362	1	7	Amph
Syn21	5.08e-05	0.474087	0.276	0.095	1	7	Syn2
Ube2e3	5.17e-05	-0.431762	0.442	0.698	1	7	Ube2e3
Fam19a51	5.25e-05	0.457252	0.238	0.06	1	7	Fam19a5
Calm2	5.59e-05	0.329736	0.967	0.888	1	7	Calm2
Cxx1b	5.98e-05	0.482387	0.486	0.328	1	7	Cxx1b
Dclk2	6.46e-05	-0.387947	0.094	0.293	1	7	Dclk2
Dip2b	6.93e-05	-0.418763	0.149	0.371	1	7	Dip2b
Kctd81	6.93e-05	-0.28575	0.442	0.698	1	7	Kctd8
Nr2f1	6.98e-05	0.462454	0.166	0.026	1	7	Nr2f1
Rab11fip5	7.73e-05	-0.315615	0.276	0.526	1	7	Rab11fip5
Ttyh11	7.9e-05	0.4904	0.287	0.095	1	7	Ttyh1
Tmsb4x2	8.06e-05	0.427634	0.851	0.75	1	7	Tmsb4x
Dlgap1	8.51e-05	-0.280305	0.597	0.828	1	7	Dlgap1
Tmem130	9e-05	0.325226	0.961	0.888	1	7	Tmem130
Nr2f22	9.05e-05	0.398857	0.149	0.017	1	7	Nr2f2
Rps161	9.15e-05	0.375354	0.757	0.698	1	7	Rps16
Rgs171	9.49e-05	0.460651	0.359	0.233	1	7	Rgs17
Chrm2	9.61e-05	0.397699	0.133	0.009	1	7	Chrm2
Gm12184	9.66e-05	-0.278327	0.116	0.319	1	7	Gm12184
Slc29a1	0.000108002	-0.33052	0.083	0.267	1	7	Slc29a1
Stk32c1	0.000110797	0.501755	0.343	0.19	1	7	Stk32c
Rps211	0.000119746	0.415202	0.851	0.784	1	7	Rps21
Ltbp1	0.000120565	-0.276451	0.039	0.19	1	7	Ltbp1
Tmem176a1	0.000127177	-0.346964	0.215	0.448	1	7	Tmem176a
Zbtb7a1	0.00012943	-0.389532	0.414	0.664	1	7	Zbtb7a
Ntm1	0.000137321	0.452426	0.232	0.06	1	7	Ntm
Fxyd61	0.000138539	0.583181	0.547	0.362	1	7	Fxyd6
Spred3	0.000143507	-0.393802	0.044	0.198	1	7	Spred3
Rpl34	0.000143667	0.416181	0.669	0.56	1	7	Rpl34
AI5044321	0.00014514	0.417737	0.182	0.034	1	7	AI504432
Pcdh191	0.000152437	0.542381	0.453	0.241	1	7	Pcdh19
Sobp1	0.000154715	0.296539	0.182	0.034	1	7	Sobp
Prkce1	0.000158124	-0.329187	0.348	0.595	1	7	Prkce
Ctsb1	0.000165547	0.35436	0.823	0.75	1	7	Ctsb
Ptprj	0.000175958	-0.260105	0.193	0.414	1	7	Ptprj
Rps20	0.000187887	0.404276	0.657	0.466	1	7	Rps20
Atp1a2	0.000190136	-0.638461	0.044	0.19	1	7	Atp1a2
Gabra41	0.000198352	0.301884	0.144	0.017	1	7	Gabra4
Dpp61	0.000208229	-0.302457	0.801	0.897	1	7	Dpp6
Rps23	0.00020978	0.326643	0.917	0.862	1	7	Rps23
Gnaz	0.000225837	0.480824	0.436	0.31	1	7	Gnaz
Ppp2r2a	0.000234716	-0.476374	0.398	0.621	1	7	Ppp2r2a
Snhg141	0.00023619	0.420461	0.608	0.474	1	7	Snhg14
Klf7	0.000238527	-0.484591	0.315	0.543	1	7	Klf7
Nkain2	0.000244941	0.279392	0.144	0.017	1	7	Nkain2
Edil31	0.000260721	0.428385	0.193	0.043	1	7	Edil3
Dnaja3	0.000262315	-0.371344	0.149	0.353	1	7	Dnaja3
Ldhb	0.00027088	-0.296777	0.785	0.845	1	7	Ldhb
Slc4a10	0.000284188	-0.429384	0.276	0.509	1	7	Slc4a10
Rimbp21	0.000286405	0.501966	0.414	0.284	1	7	Rimbp2
Galnt14	0.000289469	0.314263	0.16	0.026	1	7	Galnt14
Kcnk13	0.000294473	0.312098	0.133	0.017	1	7	Kcnk13
Tmem222	0.000316014	-0.279419	0.343	0.578	1	7	Tmem222
AI5934421	0.000318996	0.448847	0.188	0.043	1	7	AI593442
Bad	0.000325388	-0.339715	0.171	0.379	1	7	Bad
Basp12	0.000337431	-0.299713	0.729	0.888	1	7	Basp1
Rbfox31	0.000343183	-0.45925	0.293	0.517	1	7	Rbfox3
Kcnn3	0.000344082	-0.286663	0.171	0.379	1	7	Kcnn3
Wipi11	0.000351828	0.476221	0.282	0.198	1	7	Wipi1
Pde1a1	0.000363968	-0.407269	0.442	0.655	1	7	Pde1a
Zc2hc1a1	0.000385732	-0.319108	0.243	0.466	1	7	Zc2hc1a
Osbpl5	0.000410368	-0.291623	0.11	0.293	1	7	Osbpl5
Ubl31	0.000423503	0.339369	0.895	0.819	1	7	Ubl3
Tmeff1	0.00045519	-0.391306	0.238	0.457	1	7	Tmeff1
Btrc	0.000459627	-0.272904	0.227	0.44	1	7	Btrc
Rapgef4	0.000478199	-0.528954	0.138	0.328	1	7	Rapgef4
Cacng21	0.000543292	0.448249	0.193	0.052	1	7	Cacng2
Rnpep	0.000544526	-0.250243	0.21	0.414	1	7	Rnpep
Slc25a22	0.000557934	0.346588	0.448	0.388	1	7	Slc25a22
Tmprss11a1	0.000575316	0.559715	0.287	0.129	1	7	Tmprss11a
Synpr1	0.00058461	0.578988	0.254	0.112	1	7	Synpr
Cers21	0.000625806	-0.251602	0.282	0.491	1	7	Cers2
Rab9	0.000656158	0.447457	0.293	0.155	1	7	Rab9
Elfn11	0.000719088	0.430023	0.53	0.362	1	7	Elfn1
AW5519841	0.000736905	0.436041	0.436	0.31	1	7	AW551984
Shisa2	0.0007877	0.321001	0.149	0.026	1	7	Shisa2
Chn12	0.000830868	-0.291895	0.497	0.716	1	7	Chn1
Alox8	0.000831117	-0.425916	0.055	0.19	1	7	Alox8
Lgmn	0.000848724	-0.399956	0.331	0.543	1	7	Lgmn
Eif2b1	0.000849195	-0.269253	0.083	0.241	1	7	Eif2b1
Bckdhb	0.000874121	-0.278766	0.066	0.216	1	7	Bckdhb
Txndc12	0.000926563	-0.276036	0.122	0.293	1	7	Txndc12
Stard101	0.000943481	-0.251746	0.227	0.422	1	7	Stard10
Cmbl	0.00097794	0.378667	0.204	0.086	1	7	Cmbl
Dync1i21	0.000987959	0.453606	0.586	0.474	1	7	Dync1i2
Mettl7a1	0.00100834	-0.29589	0.133	0.31	1	7	Mettl7a1
[truncated: 282 more rows]
