# Supplementary material for: Anatomical and single-cell transcriptional profiling of the murine habenular complex
Source: eLife. 2020 Feb 11;9:e51271. doi: 10.7554/eLife.51271 (PMC7012610; doi:10.7554/eLife.51271)
Supplement: Supplementary file 6. [file elife-51271-supp6.xlsx]

## Sheet: Sheet1
Statistical comparisons for Figure 5 and Figure 5--Figure Supplment 3
one-way ANOVA with Tukeys correction for multiple comparisons, statistically significant comparisons (red) P<0.05
	Gpr151					Chrm3					Vgf					Sst
	VGAT	DAT	DRN			VGAT	DAT	DRN			VGAT	DAT	DRN			VGAT	DAT	DRN
VGAT	x	0.002	0.0025		VGAT	x	0.0025	0.0321		VGAT	x	0.3905	0.0545		VGAT	x	0.6668	0.7977
DAT	x	x	0.6533		DAT	x	x	0.0735		DAT	x	x	0.5145		DAT	x	x	0.9424
DRN	x	x	x		DRN	x	x	x		DRN	x	x	x		DRN	x	x	x
